# Supplementary material for: Reshaping of bacterial molecular hydrogen metabolism contributes to the outgrowth of commensal E. coli during gut inflammation
Source: eLife. 2021 Jun 4;10:e58609. doi: 10.7554/eLife.58609 (PMC8177889; doi:10.7554/eLife.58609)
Supplement: Figure 1—source data 1. [file elife-58609-fig1-data1.xlsx]

## Sheet: Figure 1-Source Data 1
Figure 1-Source Data 1. Mapping of metagenomic sequencing of murine cecal content to hydrogenases
NCBI Accession	Protein Sequence	Previous Class	New Class	Activity (predicted)	Oxygen-Tolerance (predicted)	Subunits (predicted)	Metal Centres (predicted)	Accessory Subunits (predicted)	average control	average DSS	control1	control2	control3	control4	control5	control6	DSS1	DSS2	DSS3	DSS4	DSS5	DSS6
WP_004052440.1	MYNDENVIKIKHDVLYEVAKLAFDGTLEEKRDEIPEKLIPGPQPQFRCCIYKEREIIRQRVRLAEGKNLRGQGDNVIQVISSACEGCPISSYTVTDNCQNCLGKACMNACKFGAITMGRDRSYIDPSKCKECGQCAKACPYNAIVGVKRPCKVACPVDAITYDEYNVSVIDKEKCIRCGQCIHNCPFGAIGSQTFMIDVIEALKSGKKVYAMIAPASEGQFGADITMQSWKNALKKLGFEDTIEVGLGGDMTAASEADEWAEAYKEGKKMTTSCCPAFVNMVYRHYPELKDHVSTTVSPMCGVSRMIKAKDPDAYTVFVGPCIAKKSEVKDQKIEGNADAVLTYSEIRTIMKVKGIALEPAENEYQESSIFGKRFGNSGGVTEAVLQCLKETNQEMNAK…	[FeFe] Group B	[FeFe] Group B	Evolving	Labile	1	[FeFe]-centre, 3 x [4Fe4S] clusters, 1 x [2Fe2S] cluster	None	16.0058	0.12325	16.57	23.4457	2.06137	10.7449	21.8401	21.3727	0.739501	0	0	0	0	0
WP_004054251.1	MTFNELHRTVLKSKKDNTPLPRNLTDREQHQLDCLLHPDEHPLVWKTDACDCQDGSCAAACTFAALEIKDGQISFDPEKCTGCAKCIEACQNENLTFSHDSVKALELLKDDAHPVYALMAPAFIGQFGKDATPSRIRTALKQIGFTGMIEVAAFADILTLKEALEFQHNMEQPDAFQLTSCCCPIWINLIRKDFGKIVGHLPASVSPMIACGRIAKQLHKGCRTIFIGPCLAKKAEAKEPELAGAIDCVLTFEELDYIFDTFSVDFSKLKDEVKEHSAAAGRLYARTGGVSQAVMECVKNINPDCQIDPVCENGIANCKKLLEDILNGKASGNFFEGMACDGGCVGGPKRVIPAQEGTQLVNDYAAQAPYRTPAENPYVIDLIHRLGFFTIEEFLKNSD…	[FeFe] Group B	[FeFe] Group B	Evolving	Labile	1	[FeFe]-centre, 2 x [4Fe4S] clusters	None	9.17317	0	10.6522	16.7469	2.06137	8.26529	13.7512	3.56212	0	0	0	0	0	0
WP_028324338.1	MGNRITIDPITRIEGHLRIEVEVEGGKVKDAWSSGQMFRGIEIILQGRDPRDAQHFVQRSCGVCTYTHALASVRAVEAAVNVTIPPNARLIRNLLHGAQFQHDHLVHFYHLHALDWVDIVSALKADPAKTAALADNVSNASVGGTAYYKSVQQRLQTFVDSGQLGPFSNAYWGHPAYKLPAEANLMAAAHYIEALKLQARTARMHAVFGAKNPHLQSLVVGGVTCVKDLTPDRIAEFLYLWKETQEFVNNVYVPDLLAVASFYKDWGGIGGTTNFLAYGDLPASEKEPESLYMPRGVVFKRDLAKVGDVNQEKITESVIHSWYEEGSPKHPYKGETKPKHGDYNTAGKYSWLKAPRYEGESCEVGPLARVLVAYGKGHPEIKKLVDDTVKKLDIPVTAL…	[NiFe] Group 1b	[NiFe] Group 1b	Anaerobic Uptake	Sensitive	3	[NiFe]-centre, 2 x [4Fe4S] clusters, 1 x [3Fe4S] cluster	Cytochrome	0	4.56246	0	0	0	0	0	0	0.739501	4.97566	8.34913	4.38373	6.12988	2.79685
WP_004065781.1	MRCVQICDKVQSLNIWDIINTGKRTSVGVSKIRKITEADCALCGQCITHCPTGALRERDDVRKVMDAVNNPDKIVVAQIAPAVRASWGEGLGLAQHMATEKRMAAAARALGIDYVFDTNFSADLTIMEEANEFLERFTHRDEYRWPMFTSCCPGWVRFVKSQYPDMVKHLSTAKSPQQMFGAVAKSYFAEKILQTDPENIFCVSIMPCTAKKAEAALPNINDANAGRDVDAVLTTREFDRMLRSELITPANLEEEEFDSPLGTGSGAAVIFGATGGVMEAALRTAYYALHKENPKPDLFQSVRGLDGIKEATFDIAGTTIRTAVVHGLGNTRTLMERIKAKEADYDFVEVMACPGGCADGGGQPIIEGQEPAGERGAKLYALDQNNPLRFSHENPSVIA…	[FeFe] Group A2	[FeFe] Group A2	Evolving	Labile	2	[FeFe]-centre, 3 x [4Fe4S] clusters, 1 x [2Fe2S] cluster	NADH-dependent glutamate synthase	15.6482	3.15672	10.6522	31.2609	9.27618	17.3571	15.3689	9.97394	6.65551	0.995132	5.21821	1.46124	3.67793	0.932283
WP_027202827.1	MQLRPIYTEPDNCQDCYKCIRECPVKAIRMENNQASIIEDRCIYCGHCTQVCPTGAKKIRDGLTRAKLTLTQNPKVILSLAPSYVSEFEGVHSSVLIAAIKRLGFTSVSETALGAEIVTDRTEKFLEEAESGVYISSACPVVVEYIRKYSPDHVRFITPIISPMLAHAKILNQLYGEDVKIVFAGPCICKKLEADYFNNLVDVVITFKDLKKWFEQSDINLKNIAPNQPEARFVPYRSGMGAYYPIEGGMLKGMQEGKKQIHHMAFSELSTVKDVLKELDSHREDDSIFLELLACKGGCINGPAKLSHISPALKRYEIIHQSELGNPKDDFKNIDLQILFCKDPHVQDHTYTEEEIKQAMAVVGKTGPEDELNCSGCGYDSCRDFAIAMLEGRAEENMC…	[FeFe] Group C	[FeFe] Group C3	Sensory	Labile	3	[FeFe]-centre, 2 x [4Fe4S] clusters, PAS domain	Phosphatase, thioredoxin	2.50533	14.9573	2.36715	3.34938	2.06137	3.30612	3.23556	0.712424	7.39501	8.95619	1.04364	42.376	12.2598	17.7134
WP_012421152.1	MSNYTSADVPESSRVVIDPVTRIEGHLRVEMEAGDGVIKNAWTSTTQYRGIEVIACKRDPRDVWAFVERICGVCTGTHAIAALAAVEDALQYPVPVQARLMRDLVSGALGIQDHVIHFYQLQAMDWVDVMSALKADPAETAAIAKSLSDWPLSSAAYFAGVQKKLKDSIAYGQYSIFTNGYWGHPAYKLPPEVNLLGVAHYLQALVWQRDMIKIHTILGGKNPHPNFLVGGMACAINMNNDQAINQFSLSYLKQLVQTCHDFIHKVYYPDIVAIAGFYKDYAHIGASNPNFFCTGAPSEINTGAPAGKGMIKPGVLLNGDYRNVLPFDQDKIREFVTSSWYRYTEGRDAGLAPYDGETNADYNGPRPPYKWLSDHPQYTWVKAPRYDGHAMAVGPNARM…	[NiFe] Group 1f	[NiFe] Group 1f	Anaerobic Uptake	Unknown	3	[NiFe]-centre, 2 x [4Fe4S] clusters, 1 x [3Fe4S] cluster	Cytochrome b	3.29582	44.9611	1.18357	3.34938	11.3376	2.47959	0	1.42485	26.622	17.9124	10.4364	64.2947	149.569	0.932283
WP_029502586.1	MAKYMIIDGNRVEFNDEPNILALVRKAGIDLPTFCYYSDLSIYGACRMCVVEDQWGGIIASCSTPPKDKMEVKTNTPKLHQHRKMILELLLAAHCRDCTVCDKNGKCRLQELALRFGIKTVRFENKTEEMELDTSSTSIIRDPGKCILCGDCVRMCHEIQNVGAIDFAHRGAKMVVSPAFNKKIAETNCVNCGQCAAVCPTAAITVKSDLKEVWKAIYNPKKRVVVQVAPAVRVALGEEFHMKAGENVIGKIVAALRRLGFDAIFDTTVGADLTIMEESKELLKKLESGDSKYPLFTSCCPGWIRYAETQHKELLPYISTCKSPMEMFGAVIKEHFKGLDSSEGVETISVAIMPCTAKKFEASREEFKRNNVPDVDYVITTIELVKMIKEIGIQFEELD…	[FeFe] Group A3	[FeFe] Group A3	Bifurcating	Labile	3	[FeFe]-centre, 3 x [4Fe4S] clusters, 1 x [2Fe2S] cluster	NADH dehydrogenase, thioredoxin	6.62055	0.680946	1.18357	13.3975	6.18412	5.78571	8.8978	4.27454	0	0.995132	0	0	1.22598	1.86457
WP_002853139.1	MEMIHLKINGIPVEVPAGSTVLEAAKAANVDIPTLCYLKDVNCIGACRICVVEITGARGLVAACTHPAAEGMEVFTNTPKVRKSRKTTLELLLSNHKKKCLSCVRANNCELQKLSVAYGADEDRFMPEEMNKPIDDSSPFLVRDNNKCIQCMRCVAACKNVQSVSVIGNIRRGFNVHVGSAFDAPLASTACVGCGQCIVSCPVGALTEKSSEKKVWDAIADPEKKVIFFTAPSIRATLGEEFGNPVGTNVEGKMVAAIRRLGPDQVFNMDVTADLTIVEEANELIERITTGGTLPMFTSCCPGWVKFCEHFYPDFLPHLSSCKSPQQMFGAVLKSYYAQKNNIDPKNLFVVSVIPCTAKKFEVTREEQREGDFDDVDVALTTRELGRMIREAGIDFNSL…	[FeFe] Group A3	[FeFe] Group A3	Bifurcating	Labile	3	[FeFe]-centre, 3 x [4Fe4S] clusters, 1 x [2Fe2S] cluster	NADH dehydrogenase, thioredoxin	3.64359	12.2892	4.7343	6.69876	0	4.95918	4.04446	1.42485	14.79	10.9465	12.5237	13.1512	3.67793	18.6457
WP_005600915.1	MLADKNILHFKHEILYQVARLAFEGNLEEGRDALPYELVKGPKPQFYCCIYKEREIIRQRIRLAEGKAPGAYDDGNIIQVITAACEDCPISSYTVTDNCQNCPGKACINACKFGAISTGEHHSKIDGSKCKECGMCAKACPYNAIAHLKRPCKFSCPVDAITYDEYGISVIDEKKCIRCGQCIHKCPFGAIGSKTFIVDVINAIKSDRPVYAMVAPAAEGQFGKDITMASWRDAMKEVGFTDMFEVGAGADMTTMSEAEEWAEAYEKGEKKTTSCCPSFVNMIKNFYPELSDKVSETVSPMCMLSRAIKAKYPEAVTVFIGPCIAKKSEIVDQKIEGNADYALAFSEIRAIMKAKNVVLKPSDNTYQGASVFGKKYANVGGVSSSVLEYMKETGKEISP…	[FeFe] Group B	[FeFe] Group B	Evolving	Labile	1	[FeFe]-centre, 3 x [4Fe4S] clusters, 1 x [2Fe2S] cluster	None	2.99197	0	4.7343	1.11646	1.03069	1.65306	7.28002	2.13727	0	0	0	0	0	0
WP_016268012.1	MEEKQITLQIDGHFITVPEGSTILEAACKIGINIPTLCHIDLKGTCIKNNPASCRICVVEVAGRRNLAPACATRCTEGMVVKTSTLRVMNARKVVAELILSDHPNDCLTCPKCGNCELQTLALRFNIREMPFNGGELSPRKREVTSSIVRNMDKCIFCRRCESVCNDVQTVGALGAIRRGFNTTIAPAFDRMMKDSECTYCGQCVAVCPVGALTERDYTNRLLDDLADPDKIVIVQTAPAVRAALGEEFGLPPGTLVTGKMVYALRELGFDYVFDTDFAADLTIMEEGSEILNRLTRYLDGDKSVRLPILTSCCPAWVNFFEHHFPDMLDIPSTARSPQQMFGSITKSYWAEKMGIPREKLVVVSIMPCLAKKYECDRDEFKVNGVPDVDYSISTRELA…	[FeFe] Group A1	[FeFe] Group A1	Evolving	Labile	1	[FeFe]-centre, 3 x [4Fe4S] clusters, 1 x [2Fe2S] cluster	None	4.20962	13.9457	3.55072	2.23292	3.09206	3.30612	8.08891	4.98697	16.269	10.9465	11.4801	27.7636	13.4857	3.72913
WP_015560436.1	MYADENVIKIKHDVLYTVAKLAFEGRLEEERDHIATELIPGPTPQFRCCIYKEREIIRQRVRLAEGKAPGAEDDGNVIQVISSACEDCPISSYTVTENCQNCLGKACVNACKFGAIEPGRDRSHIDPSKCKECGRCAQACPYNAIAHLKRPCKFSCPVNAITYNEYGISVIDKEKCIRCGKCIHSCPFGAIASKTFIVPVIEALKAGKHIYAMAAPATEGQFGVDITMASWKKAMKEMGFTDFYDVGLGGDMTAAYEAEEWAEAYKEGNKKVTSCCPAFVNMVRLHYPELAECVSTTVSPMCAVSRLIKAKDPEAITVFIGPCVAKKSEVADQKIEGNADYVLTYSEIRAMMKAKGVELQPCANDDQTASTFGKRFANSGGVTAAVLESLKESNDEIAA…	[FeFe] Group B	[FeFe] Group B	Evolving	Labile	1	[FeFe]-centre, 3 x [4Fe4S] clusters, 1 x [2Fe2S] cluster	None	5.43235	0.525131	2.36715	3.34938	3.09206	9.09182	9.70669	4.98697	2.2185	0	0	0	0	0.932283
WP_022362192.1	MVNLTINNRPVSVPEGTTILDAAAGIGIMIPHLCYLRDINEIAACRVCQVELQGKEKLITACNNKVEEGMVIFTNSPKVRETRKTIVRLILSQHDCRCAICVRSGNCELQKIANDLGCIENPYNGRIEHNDWNPEFPIIRDNAKCIKCMRCIQVCEKIQTLHVWDVVNTGSRTTVDVANGRKIEHADCAACGQCVTHCPVGALREKDDIGKVLAALNDPETITVVQVAPAVRTAWGEDLGMPGDVATEKRLASVLRHIGFDYVFDTNFSADLTIMEEGNEFIERLKNPDKSRLPMFTSCCPGWVRFVKSQYPEFVDNLSTAKSPQQMFGAVVKSYFAKKADIDPSRICSVSIMPCTAKKAEAAYDNMSSAGYGQDVDYVLTTREFARLVRGEAIIPEAL…	[FeFe] Group A2	[FeFe] Group A2	Evolving	Labile	2	[FeFe]-centre, 3 x [4Fe4S] clusters, 1 x [2Fe2S] cluster	NADH-dependent glutamate synthase	12.877	4.61129	17.7536	7.81522	11.3376	13.2245	6.47113	20.6603	5.17651	5.97079	8.34913	2.92248	2.45195	2.79685
WP_006362914.1	MNVVNIKLNGYDYAMEKGMTVLDASFETMKFKKEYLNHPIPTLYYLQGIVDVDESGVCVAEVDGKLVNASTTRIGEGMEIETMSPKAVEARKEALSRILAVHDKDCLHCLRSSSCELQTLLKDYGFTDEPDIPDDNIEEIDTSSVVLIRDNNKCIRCKRCVNVCAKMQAVSAIACTGTGLDATIAPSSPSGLAAASCVNCGQCVAVCPVGALVEKTCIDEVNAALADPKKYVAVQVAPAVRAALGEDFEFPLGIDVEGRIAEGLRLLGFDKVFDTKFGADLTIVEEANELVDRIAHDGVLPMITSCCPGWIKYAEHFYPDMLDNISSCKSPHQMHGAIVKSFLAEREGLDKEDIVTVSVMPCTAKKFECTRNDEDGAGVPDVDIVVTTNELAKMFKDAG…	[FeFe] Group A1	[FeFe] Group A1	Evolving	Labile	1	[FeFe]-centre, 2 x [4Fe4S] clusters	None	2.83476	22.1122	0	12.2811	3.09206	0.826529	0.808891	0	13.311	23.8832	15.6546	16.0737	63.7507	0
WP_007209903.1	MAFTNNIMIVRHRLLTELVKLWRDNELVEKIDRLPIELSPRRSKHAGRCCVHKERAVWKYKSLPLLGLDMEDEKDELTPLSEYAAHALDRAENGTPKDNIMCVIDEACSACVQINYEITNLCRGCTARSCQTNCPKKAVHVKESGQAWIDHDECISCGICHKSCPYHAIVYIPVPCEEACPVKAISKDKKGIEHIDESKCIYCGKCLNACPFGAIFEVSQVFDILHKIRKGEKIVAIVAPSILGQFKTTIEQVYGALKAVGFTDVIEVAQGAMDTVSNEAHELIEKLEEGQKFMTTSCCPSYIELVNKHIPGMKPYVSGTGSPMYYAARIAKEKHPDAKVVFIGPCVAKRKEAQRDEAVDFVMTFEEVASVLDGLNIQLEQSQPYAMSFASVREAHGFA…	[FeFe] Group B	[FeFe] Group B	Evolving	Labile	1	[FeFe]-centre, 3 x [4Fe4S] clusters, 1 x [2Fe2S] cluster	None	3.49797	0.12325	7.10145	2.23292	6.18412	0	4.04446	1.42485	0.739501	0	0	0	0	0
WP_004064152.1	MKVMNELLNTADKLIYTNDKCTGCNKCVRVCPTLVSNIAQEGKIWVNRDSCIACGACLDACGHDARSYHDDTQQFFSDLKSGRKISVIIAPAFLANYPKEYKRVLGYLKSLGVNHIYSVSFGADITTWGYLKYITENNFKGGISQPCPAVVDYVEKYIPELLPRMMPVQSPMMCMAIYIKKYLKLTDDLAFISPCIAKKVEIEDKNNHGYVKYNVTFLKLMQHIGRDYTKSPEYTDELEYGLGSLYPMPGGLRENVEHFLGKEQVVRQVEGEREAYHYLQEYLKRVKSKAQLPLMVDILNCSKGCIYGTATDPAKNTDDVLLTLSKMRAMDKQEIHGKGPFRKTNKSPWSQQSTPKERMANLMEAFHELNLTDFIRKYDTSKQIKVNEPSAGELDEIYR…	[FeFe] Group C	[FeFe] Group C2	Sensory	Labile	1	[FeFe]-centre, 2 x [4Fe4S] clusters, PAS domain	Fusion with methyl-accepting chemotaxis protein	105.222	60.1377	97.0531	77.0358	77.3015	87.6121	181.192	111.138	58.4206	37.815	82.4477	46.7597	74.7845	60.5984
WP_006565663.1	MVTLTIDQMKVTVPEGTTIMEAAASIHIDIPKLCYLKGINEISACRVCVVEMEGKDKLITSCNNVVEEGMVIYTNSPKVRLNRRKTVSMLLSQHDGQCITCSRSMNCSLQKIANDFNILENPFKKEFVHKEWDKTFPLIRDANKCIKCMRCVQICDKVQGLNVWDVSGTGARTTVDVSRNRDIRVADCSLCGQCITHCPVGALRERDDTSMLFSALEDENKIVVAQIAPAVRAAWAEQLGLSREEAPVEKIVTAFRRMGIDYVFDTTFSADLTIMEEGSEFVKRLQDGDLEEYPMFTSCCPGWVRFIKTQFPDMIGRLSTAKSPQQMFGAVMKTYFAKKLGVDPERIFTLSIMPCLAKKAEREMDLFYEEYAGHDIDCVLTTRELDRMLRAEHLNPQFL…	[FeFe] Group A2	[FeFe] Group A2	Evolving	Labile	2	[FeFe]-centre, 3 x [4Fe4S] clusters, 1 x [2Fe2S] cluster	NADH-dependent glutamate synthase	9.9908	2.6961	9.4686	6.69876	6.18412	8.26529	12.9423	16.3858	4.437	0	0	4.38373	7.35585	0
WP_021739983.1	MVNLTINNKKIQVPEGTTILAAAAQAGIKIPTLCYLKEINEIGACRVCVVEVEGKETLVASCNTAVEEGMVVYTNSYKAQHARRMNVQLILSEHDAHCASCLRSGNCTLQSVANDLNIGDVPFGEKYEQNEWSQDFPLIRDASKCIKCMRCVQICDKVQELKIWDVINTGKRTSVGVSGRKQITESDCAVCGQCITHCPVGALHERDDIDKLMDAVHDPEKIVVVQIAPAVRSAWGEGIGLSREMATEKRMAAAVRALGVDYVFDTNFSADLTIMEEGNEFLERMTHADEYSWPMFTSCCPGWVRFVKSQYPDMVKNLSTAKSPQQMFGAVAKSYYAQILDVDPSRIFSVSIMPCVAKKHECAIPVMNDAGAGQDVDISLTTRELDRVLKAELISPAFL…	[FeFe] Group A2	[FeFe] Group A2	Evolving	Labile	2	[FeFe]-centre, 3 x [4Fe4S] clusters, 1 x [2Fe2S] cluster	NADH-dependent glutamate synthase	4.1342	0.329321	0	4.46584	0	8.26529	5.66224	6.41182	0	0	1.04364	0	0	0.932283
WP_007748547.1	MAFTNNIMIVRHKLLADLVRLWKNDQLIEKIDRLPVELSPRRSKPMGRCCIHKERAVWRYKTFPLMGLDMTDEHDEVAPLSDYARMALSRPEPNKENIMCVIDEACSSCVQINYEITNLCRGCVARSCYMNCPKDAIRFKKNGQAMIDHDTCVSCGICHKSCPYHAIVYIPVPCEESCPVKAISKDEHGIEHIDESKCIYCGKCLNACPFGAIFEISQTFDVLQHIRKGEKLVAIVAPSILGQFNTTIEKVYGAFKEIGFADVIEVAEGAMQTTSNEAHELLEKLEEGQKFMTTSCCPSYIELVEKHIPGMKPYVSSTGSPMYYAARIAKEKHPDAKIVFVGPCIAKRKEVRRDEAVDYILTFEEIGSILDGFDIQLEQMQEFSILHTSVREAHGFAQA…	[FeFe] Group B	[FeFe] Group B	Evolving	Labile	1	[FeFe]-centre, 3 x [4Fe4S] clusters, 1 x [2Fe2S] cluster	None	0.763291	4.34451	1.18357	0	1.03069	1.65306	0	0.712424	2.958	1.99026	3.13092	8.76745	7.35585	1.86457
WP_014118796.1	MVNIEINGKALSVPEGSTILSAAQGAGIPIPHLCYLKGINEIAACRICVVELEGTQRLIPACNTQVEEGMVIKTNSPRVRSARRTNLRLILSEHNSTCTTCIRSGNCALQTLSHDLNIHYQPYRLQPEKSRVDLDAPVVREASKCIKCMRCVQICDKVQGMHIWDVAGTGSRTTVDVSFNRLLKNTDCTFCGQCVTHCPTGALTIRDDSNKVLRALADPEITTVIQVAPAVRVAWAEAFSLSPKFATAGRMVAALRRMGFDYIFDTNFTADLTIMEEGSEFLERYTHRGKYRWPMFTSCCPGWVRFVKSQFPSYTECLSTAKSPQQMFGAIAKSYFAEKKGIDPHKMFVVSIMPCSAKKSECELPTMKDACGDPDVDAVLTTREMVRLLRSDCIVPTDL…	[FeFe] Group A2	[FeFe] Group A2	Evolving	Labile	2	[FeFe]-centre, 3 x [4Fe4S] clusters, 1 x [2Fe2S] cluster	NADH-dependent glutamate synthase	159.032	74.4923	204.758	133.975	341.157	108.275	42.0623	123.962	109.446	72.6447	96.015	46.7597	69.8806	52.2078
WP_015359537.1	MECLTLKKSNCKNCYKCIRHCPVKSIRFSGNQAYIIGDECIMCGQCFVVCPQNAKQIVDETEKVKVLLQSGAPVVVSLAPSFVANYEVGIEAMREAIKKLGFYDVEETAIGATIVKREYERLVKDEERDIIITSCCHSVNLLIQKHFPRCLPYLADIMSPMQVHCKDIKKRIPNAKTVFIGPCVAKKDEAQQYKGIVDAVLTFDELTAWLKAENITLEKKTDSNENSRARFFPTTGGILKTMDKKNPKYVYMAIDGAENCIAALRDIEKGNLHHCFIEMSACAGSCIGGPVMEKHHRSPVRDFAVISRYAGKKDFLVEQPSRAEIRKDFEIIEQRLREPTEEEILDTLRQMGKMKPSDELNCGSCGYNTCREKAIAICQGKAEISMCLPFLKEKAENFS…	[FeFe] Group C	[FeFe] Group C3	Sensory	Labile	3	[FeFe]-centre, 2 x [4Fe4S] clusters, PAS domain	Phosphatase, thioredoxin	3.74589	9.19079	4.7343	5.5823	3.09206	1.65306	2.42667	4.98697	11.832	8.95619	4.17457	11.6899	11.0338	7.45826
WP_006568603.1	MPEAKKSTSFHELYKELLQKQMKNEDISEADYDPHQLDCLLNPDQYAPVIHTESCESCAYDRACKNSCIFDAIEEVDGKLSIDPDKCSGCGVCIESCRLDKLAESKDIFPVLKEVRSEEKDVYALIAPAFVGQYENASPGQLRSALKAAGFKGMVEVAVFADILTLKEALEFDEHINSNDDFQLTSCCCPVWIAMIRKIYHELIPHVPGAVSPMIAAGRAVKQIHPDAVTVFIGPCIAKKKEAREPDIADAVDYVLTFQEVQDIFDAAGIQPEELADNDREHSSRAGRIYAHTGGVSEAVRSTVEKLSPGRDVPVRAQQADGVPACKAMIEQIQKGETDANFFEGMACRGGCVGGPKIIIDKDKGKRNVETYGEEAPYKTPLDNPYVMELLHRLGFKNM…	[FeFe] Group B	[FeFe] Group B	Evolving	Labile	1	[FeFe]-centre, 2 x [4Fe4S] clusters	None	2.25838	0.12325	3.55072	1.11646	1.03069	2.47959	3.23556	2.13727	0.739501	0	0	0	0	0
WP_014080018.1	MYADENVIKIKHDVLYEVAKLAFAGELDEKRDNIAMSLIPGPTPQFRCCIYKEREIIRQRVRLAEGKAPGLTDDGNVIQVISSACEDCPISSYIVTENCQNCLGKACINACKFGAIEPGRTRSHIDPTKCKECGRCAQACPYNAIAHLKRPCKFSCPVNAITYDEHGISVIDKKKCIRCGKCIHSCPFGAIGSKSFIVDVINALREGKHVYAMAAPATEGQFGDDITMASWKNAMKELGFTDFFDVGLGGDMTAAYESEEWAEAYKAGEKKVTSCCPAFVNMVRLHYPDLADCVSTTVSPMCAVSRLIKARDPEAITVFIGPCIAKKSEVVDQQIPGNADYVLTYSEIRAIMKAKSVVLQPAANDDQIASTFGKRFANSGGVTAAVLQSLKESEDEIDA…	[FeFe] Group B	[FeFe] Group B	Evolving	Labile	1	[FeFe]-centre, 3 x [4Fe4S] clusters, 1 x [2Fe2S] cluster	None	5.50043	1.48543	1.18357	7.81522	4.12275	6.61223	9.70669	3.56212	0.739501	1.99026	1.04364	1.46124	3.67793	0
WP_004613839.1	MRGLETPIRRIRRQVFTKVAKLAFESTPETLIDDIEAVPYELINEDTEKYRESIYRSRAIVRERMRLAMGMSLRPEDKPVHLTAGIEESNISEKYYEPPLMQVIPSACAACEEKGYEVSDMCKGCVAHPCREVCPVGAISMKKGRSYIDQEKCIKCGKCKSVCPYDAISKKERPCAKACGVNAIGSDKMGRAHIDNDKCVSCGMCMVSCPFGAISDKSQIFQLGRALKEGGEIIAEIAPAFVGQFGPNITPRHIKAALQELGFAEVYEVALGADIGAIAEAHHYVEKVVTGELPFLLTSCCPAWSMLAKKYFPDLADQVSQELTPMVATARTIKLEHPNAKVVFIGPCASKKLEASRRTVRSDVDFVITFEELQAMFDAREIDLTEYEAESSFHDATGA…	[FeFe] Group B	[FeFe] Group B	Evolving	Labile	1	[FeFe]-centre, 2 x [4Fe4S] clusters	None	69.4372	43.3376	60.3623	52.4736	57.7185	61.9897	97.8758	86.2033	39.1935	37.815	29.222	33.6086	50.265	69.9212
WP_009146318.1	MVNLTIDGQKVSVPQGTTIMQAAATVGIEIPRLCYLKGINEISACKVCVVEIQGQNRVVTACTTPVQEGLVVYTNSPKARSIRRTNVELILSQHDCMCATCVRSGNCSLQTLANDLGIYDIPYERDVVDTPWNQEFPLIRDSKKCIKCMRCVQICDKVQKLHIWDVQNTGARTTVDVAGNVSIEDSDCSLCGQCITHCPVGALKERNDVPKIYDVLADPNKVTVVQVAPAVRTSWAEAFNLPPELATEGRMVATLKKIGFDYVFDTCYAADVTIMEEASELLEHLQKPQDHSWPMFTSCCPGWVSYVNKTHPYFVPNLSTTKSPQQIFGALAKSYFAQKKGLKPKEICSISIMPCVSKKREAALFSMRSSGTHDVDIVLTTREFIRLLRAEHINPAMLD…	[FeFe] Group A2	[FeFe] Group A2	Evolving	Labile	2	[FeFe]-centre, 3 x [4Fe4S] clusters, 1 x [2Fe2S] cluster	NADH-dependent glutamate synthase	5.78219	1.27697	2.36715	3.34938	2.06137	4.13265	17.7956	4.98697	1.479	0	1.04364	1.46124	3.67793	0
WP_024986193.1	MEEKQITLQIDGHFITVPEGSTILEAANKIGINIPTLCHIDLKGTCIKNTPASCRICVVEVIGQRNLAPACATRCTEGMVVKTSTLRVMNARKVVAELILSDHPNDCLTCPKCGNCELQTLALRFNIREMPFNGGELSPRKREITASIVRNMDKCIFCRRCESVCNDVQTVGALGAIRRGFNTTIAPAFDRMMTESECTYCGQCVAICPVGALTERDYTNRLLDDLANPNKVVIVQTAPAVRAALGEEFGFPPGTLVTGKMVYALRELGFDYVFDTDFAADLTIMEEGSEILNRLTRYLNGDKSIRLPILTSCCPAWVNFFEHHFPDMLDIPSTARSPQQMFGSIAKSYWAEKMGIPREKLVVVSIMPCLAKKYECDRDEFKVNGIPDVDYSISTRELA…	[FeFe] Group A3	[FeFe] Group A3	Bifurcating	Labile	2	[FeFe]-centre, 3 x [4Fe4S] clusters, 1 x [2Fe2S] cluster	NADH dehydrogenase	1.89504	8.61239	3.55072	0	6.18412	0.826529	0.808891	0	17.748	4.97566	2.08728	8.76745	17.1637	0.932283
WP_028527755.1	MRGLDTPIKKIRREIFREIARIAFESDQEHFKGEIEAIPYHIVEERAKYRDSIYRERAVASERVRLAMGMSLRPENRAVHITAGVDKSNIDEKYYEPPLMQVIPSACDACEPNSYMVSDMCRGCVAHPCREVCPKGAIIVKKGKSIIDQEKCIRCGKCKQVCPYDAISKMERPCARACGVNAIDSDEQGRATINHKKCVSCGMCMVSCPFGAISDKSQIFQLCKALREEQFIVAEVAPAYIGQFGKHVTPEKLKAALLLLGFREVYEVALGADIGAVAEAHHYAQKVVTGELPFLLTSCCPSWSLLAKKHFPDLVDSVSQELTPMVATARSIKQKHPDARVVFVGPCASKKLEASRRTVRSDVDFVITFEELVGMFEAKGIDLEEMEPSGGNFAMNDAT…	[FeFe] Group B	[FeFe] Group B	Evolving	Labile	1	[FeFe]-centre, 2 x [4Fe4S] clusters	None	67.8602	43.0771	62.7294	52.4736	65.964	66.1223	80.0802	79.7915	51.7651	22.888	27.1347	42.376	49.039	65.2598
WP_005929426.1	MAFTNNVMIVRHKLLADLVRLWKKDELTDKIDRLPIELSPRKSKPLGRCCIHKERAVWKYKCLPLLGLDMADEKDELTTLSEYARQALDRETCTKENILCVIDEACSSCVQINYEITNLCRGCVARSCYMNCPKDAIRFKKNGQAMIDHDTCVSCGICHKSCPYHAIVYIPVPCEEACPVKAISKDERGIEHINESKCIYCGKCMNACPFGAIFEISQAFDVLQHIRKGEKMVAIIAPSILGQFKTDIEHVYGAFKEIGFTDVIEVAQGAMDTTSNEAHELLEKLEEGQAFMTTSCCPSYIELVEKHIPDLKPYVSTTGSPMYYAARIAKEKHPDAKIVFVGPCVAKRQEIRRDEAVDFILTFEEIGSILDGMDIRLEQAQPFSLAYTSVREAHGFAQA…	[FeFe] Group B	[FeFe] Group B	Evolving	Labile	1	[FeFe]-centre, 3 x [4Fe4S] clusters, 1 x [2Fe2S] cluster	None	4.37978	15.1226	1.18357	6.69876	5.15343	3.30612	5.66224	4.27454	2.2185	19.9026	20.8728	39.4535	7.35585	0.932283
WP_007665069.1	MAFTNNIMIVRHRLLTELVKLWRDNELVEKIDRLPIELSPRRSKHAGRCCVHKERAVWKYKSLPLLGLDMEDEKDELTPLSEYAVHALDRAENGTPKDNIMCVIDEACSACVQINYEITNLCRGCTARSCQTNCPKKAVHVKESGQAWIDHDECISCGICHKSCPYHAIVYIPVPCEEACPVKAISKDKKGIEHIDESKCIYCGKCLNACPFGAIFEVSQVFDILHKIRKGEKIVAIVAPSILGQFKTTIEQVYGALKAVGFTDVIEVAQGAMDTVSNEAHELIEKLEEGQKFMTTSCCPSYIELVNKHIPGMKPYVSSTGSPMYYAARIAKEKYPDAKVVFIGPCVAKRKEAQRDEAVDFVMTFEEVASVLDGLDIQLEQSQPYTMSFASVREAHGFA…	[FeFe] Group B	[FeFe] Group B	Evolving	Labile	1	[FeFe]-centre, 3 x [4Fe4S] clusters, 1 x [2Fe2S] cluster	None	2.34927	8.80194	1.18357	2.23292	2.06137	4.95918	0.808891	2.8497	3.6975	7.96106	5.21821	30.6861	2.45195	2.79685
WP_010251391.1	MDNNIIISKEEKCVGCNKCIYVCPVEGANISYIKDGKSYTKIDESKCITCGSCINACDHQARSYQDDLESFLNDLKNGEKISILAGPAFKISFPNYQQILGFLKSLGVINFYDVSIGADITTWAYLRAIKDRNLKSVVAQPCPAVVNYVQKYRHEILPYLSPIHSPMMCTAIYLNKYLKVNDKLGFLSPCIAKKSEMQDPNTNKLVKYNITFKNLFDYIKSKGIDLSSFSKWDFAVHSYLAGDIYSMPGGLKENVCLYTKDAFIKQVEGPQQAYKYLDEYAQRCTSGNTLPLLVDILNCQNGCNIGTGTIKENSITELEEKVHSLKTNKSSKFNKNPQNLFKYFNKELKLEDFTRNYSKEDIGLPKEPSEADYNNIFSKMLKTTYEDKNKNCFSCGYGN…	[FeFe] Group C	[FeFe] Group C2	Sensory	Labile	1	[FeFe]-centre, 2 x [4Fe4S] clusters, PAS domain	Fusion with methyl-accepting chemotaxis protein	37.3049	61.5561	43.7923	17.8634	45.3502	35.5408	36.4001	44.8827	34.017	62.6933	87.6659	45.2985	57.6209	82.0409
WP_008369976.1	MNADGNVIKIKHDVLFEVAKLAFAGELEEQRDHLPLKLIPGPTPQFRCCIYKEREIIRQRIRLAEGKAPGPEDDGNIIQVISSACEDCPISSYTVTENCQNCLGKACINACKFGAIEPGHYRSHIDASKCKECGQCAKACPYNAIAHLKRPCKFSCPVDAITYDEHGISIIDKNKCIRCGKCIHSCPFGAIASKTFIVPVINALREGKHIYAMAAPATEGQFGADITMESWRKAMKELGFVDFYDVGLGGDMTAAYEAEEWAEAYKEGQKKVTSCCPAFVNMVRLNYPQLADNISTTVSPMCAISRMIKAQDPEAITVFIGPCLAKKSEVVDQQIEGNADYVLTYSEIRAIMKAKDVELEACPNDNQTASTFGKRFANSGGVTAAVLESLKESDNCIDA…	[FeFe] Group B	[FeFe] Group B	Evolving	Labile	1	[FeFe]-centre, 3 x [4Fe4S] clusters, 1 x [2Fe2S] cluster	None	4.55122	0.956046	3.55072	2.23292	8.2455	4.95918	4.04446	4.27454	3.6975	0.995132	1.04364	0	0	0
WP_005941255.1	MEEQQITLQIDHHFITVPAGTTLLEAARKIGIDIPTLCHINLKGTCIKNNPASCRICVVEVEGRKNLAPACATRCTDGMVVRTSTLRVMNARKIVAELILSDHPNECLTCPKSGNCELQNLALRFNIREMPFNGGELSPRKREVTSSIVRNMDKCIFCRRCESVCNDVQTVGALGAIRRGFNTTIAPAFDKMMTDSECTYCGQCVAVCPVGALTERDHTNRLIEDLSNPDKIVIVQTAPAVRAALGEEFGLPAGTLVTGKMVYALRELGFNYVFDTDFAADLTIMEEGSEILNRLTRYLNGDRSVRLPILTSCCPAWVNFFEHQFPDMLDIPSTARSPQQMFGSIAKTYWAEKMGIPREKLVVVSIMPCLAKKYECDRDEFKTNGNPDVDYSISTRELA…	[FeFe] Group A3	[FeFe] Group A3	Bifurcating	Labile	2	[FeFe]-centre, 3 x [4Fe4S] clusters, 1 x [2Fe2S] cluster	NADH dehydrogenase	0.357858	2.74752	0	1.11646	1.03069	0	0	0	3.6975	0.995132	1.04364	5.84497	4.9039	0
WP_006573282.1	MNELKHSVVLEYKRCRGCTTCIKSCPTEAIRVRNGKAAILNARCIDCGVCIQVCPHKAIKSISDPLDMLKKFRYCVALPEPALYGQFHNMDDIDIILNGLLEIGFHDVYEVSKAAELVSDYQRQCITGGVDRVMPQISSACPTVLRLIRMRFPKLIPNIAPVITPVELAAILARREAVEKTGLKPEEIGVFSIVPCSSKVTAALTPDGLNHPVLDGAFAIRDIYLRLLSAMKKLRGQELRPLSSSGIMGVGWAYCGGESAARMGERYVAVDGISNVIRMLEEIEDGRLPEADFIELNACVQGCVGGCLTVENPYGARMRIKKLMKGLPVSRNRFTFKGEDRDVVKFDYELQYVPVFVLDEDRAAAMEKLAKIEALEQQLPGLHCGSCGAPSCRAFAEDV…	[FeFe] Group C	[FeFe] Group C1	Sensory	Labile	2	[FeFe]-centre, 2 x [4Fe4S] clusters, PAS domain	Histidine kinase	4.91707	15.7261	0	13.3975	3.09206	3.30612	9.70669	0	9.61351	23.8832	12.5237	10.2287	30.6494	7.45826
WP_012158789.1	MVKLTIDGIQVEVPKGTTILEAARTLDIHIPTLCHLKGVNNSGSCRVCVVESGPRLVASCSIMAEDGMDIKTNTAKVRESRKTVVKLILSDHKRECTTCIRSENCELQSLSSELNIRDIEYDGERLQLGTDSLSPSVSRDPEKCILCGRCISTCSKVQEVHAIGFIERGFDTTVAPAYAKSLDDVFCTNCGQCITACPVGALYEKENIKDVWKAIYDKEKYVVVQTAPAIRAALGEEFGIPVGTSVTGKMVAALRRLGFDKVFDTDFTADLTIMEEGTELISRLTSGENLPLMTSCCPGWIKFAEHFYPDMLDNLSTCKSPHEMEGALIKSYFAEKMAMDPKKIVTVSIMPCTAKKFESARGELSNDGLQDVDLVLTTRELARMIKEAGIDFENLPVEE…	[FeFe] Group A3	[FeFe] Group A3	Bifurcating	Labile	4	[FeFe]-centre, 3 x [4Fe4S] clusters, 1 x [2Fe2S] cluster	NADH dehydrogenase, thioredoxin, thioredoxin	0.137755	2.30231	0	0	0	0.826529	0	0	2.958	0.995132	1.04364	1.46124	7.35585	0
WP_015560495.1	MELIYANDNCTGCNKCVRDCPVLIANVATDAGKVIVDSEKCIACGACFDACEHNAREYQDDTKSFFTALEAGKKISVILAPAFFANYPHEYKKVLGYLKEKGVNHIYSVSFGADITTWGYLKYITEHQFLGGISQPCPAVVNYVEKYIPELLPKMMPIHSPMMCMAIYIKKYLKCDDELAFISPCIAKKTEITDPNCYGYVKYNVTFKKLFETIGNKYQGCKEYEDELEYGMGALYPMPGGLRENVEHFLGKEQVVRQVEGEKEAYRYLHEYLERIKKNKRQPFMVDILNCSKGCIYGTATELERNTDDVMLTLSDMRNKTANAGADAKRGLFGKKTKNGSPWDESVPEKDRLVNLMKAFEDLDINDFVRKYTNKSVEIKEPAEHEMQEIFASMNKTDA…	[FeFe] Group C	[FeFe] Group C2	Sensory	Labile	1	[FeFe]-centre, 2 x [4Fe4S] clusters, PAS domain	Fusion with methyl-accepting chemotaxis protein	112.138	75.7309	107.705	87.0839	82.455	102.49	157.734	135.361	53.9836	52.742	98.1023	87.6745	68.6546	93.2283
WP_005884626.1	MKHLSENIRVPIELDNPSIMRNESLCIKCGQCKEVCEKYIGVHNTYKLVDTNNIAVCINCGQCANVCPTSSITEKHEYQDIKKAILDSDKIVIFSTSPSVRVALGEEFGEEDGKFLEGKMISLLRKLGGDYILDTNFAADMTILEEASELIERVSKKTAPLPQFTSCCPSWVKYLETYLPDMRENLSSAKSPIGMQGPTIKTYFAKMKNIDPKKIVNVAVTPCTAKKFEIRREEMNAAGRYLDIPGMRDMDYVITTRELAKWAKEEGIDFSSLEDSKYDSLMGEASGAGVIFGNTGGVMEAALRTAYKYITGEDAPEVLLNFELVRGMKDVKTAIVKVKDLELKVAVIYGTKSAKDFIEKIKRENEEYHFIEVMTCPGGCIGGGGQPKGTLEKGDALRE…	[FeFe] Group A1	[FeFe] Group A1	Evolving	Labile	1	[FeFe]-centre, 2 x [4Fe4S] clusters	None	7.12922	13.8742	3.55072	12.2811	5.15343	4.95918	9.70669	7.12424	10.353	8.95619	12.5237	13.1512	19.6156	18.6457
WP_013738980.1	MVNLTINGLPVQAPESATILEAAALVNIHIPTICFLKDINEIGACRVCVVEIEGVDKLASACNNRVREGMVVLTNSPRVRQTRRTNVELILSEHDCFCATCVRSGNCALQKVANDLGILELPYERRPAPTKWDHSFPLFRDAAKCIKCMRCIQVCDKIQGLNIWDLVGTGSRTTVDVSFSRKITDADCALCGQCITHCPVGALRERDDTQRMFQAIANPKKITVIQIAPAVRAAWGEALGLPREKATVKRLVAALRKIGFDYVFDTTFSADLTIMEEGHEFLERLAGRNDHPWPMFTSCCPGWVRFIKSQYPDMTENLSTAKSPQQMFGAVAKTYYAQLLGANPADIFSVSIMPCVAKKSEAELPTMNDAEAAQDVDLVLTTREIVRMIRAEKIDVKSL…	[FeFe] Group A2	[FeFe] Group A2	Evolving	Labile	2	[FeFe]-centre, 3 x [4Fe4S] clusters, 1 x [2Fe2S] cluster	NADH-dependent glutamate synthase	5.18268	1.95526	4.7343	5.5823	5.15343	5.78571	4.85335	4.98697	2.2185	0.995132	1.04364	4.38373	1.22598	1.86457
WP_009132353.1	MAFTNNIMIVRHRLLTELVKLWRDNELVEKIDRLPIELSPRRSKHAGRCCVHKERAVWKYKSLPLLGLDMEDEQDELTPLSEYAARALDRAENGKPKDNIMCVIDEACSACVQINYEITNLCRGCTARSCQTNCPKKAVHVKESGQAWIDHDECISCGICHKNCPYHAIVYIPVPCEEACPVKAISKDKKGIEHIDESKCIYCGKCLNACPFGAIFEVSQVFDVLHKIRKGEKVVAIVAPSILGQFKTTIEQVYGALKAVGFADVIEVAQGAMDTVSNEAHELIEKLEEGQKFMTTSCCPSYIELVNKHVPGMKPYVSSTGSPMYYSARIAKEKHPDAKVVFIGPCVAKRKEAQWDDAVDFVMTFEEVASVLDGLDIQLEQTHPYSMSFASVREAHGFA…	[FeFe] Group B	[FeFe] Group B	Evolving	Labile	1	[FeFe]-centre, 3 x [4Fe4S] clusters, 1 x [2Fe2S] cluster	None	2.4902	0	2.36715	0	0	0.826529	8.8978	2.8497	0	0	0	0	0	0
WP_025075971.1	MAFTNNIMIVRHKLLADLVRLWKTDQLVEKIDRLPIELSPRKSKPMGRCCVHKERAVWKYKTFPLMGFDMTDEHDELTPLSDYAKIALNRPEPVKENIMCVIDEACSSCVQINYEISNLCRGCVARSCYINCPKDAIRFKKNGQAMIDHDTCISCGICHKSCPYHAIVYIPVPCEEACPVKAISKDEHGIEHIDESKCIYCGKCMNACPFGAIFEISQTFDVLQRIRKGEKMVAIIAPSILGQFHTSIDRVYGAFKEIGFTDIIEVAEGAMMTTSNEAHELLEKLEEGQPFMTTSCCPSYIELVEKHLPGIKPYVSSTGSPMYYAARIAKEKYPDAKIVFVGPCVAKRKEVRRDEAVDFILTFEEVGSILDGLDIQLEEVQTFSVVQTSVREAHGFAQA…	[FeFe] Group B	[FeFe] Group B	Evolving	Labile	1	[FeFe]-centre, 3 x [4Fe4S] clusters, 1 x [2Fe2S] cluster	None	0.783192	5.63592	0	1.11646	2.06137	0	0.808891	0.712424	2.2185	0	2.08728	23.3799	6.12988	0
WP_027202830.1	MLYDNFAMLTKRELLIRIVKLLKEENLVDGVKYIPVEMRPKNKRPIKCCVHKDRYILKHKIISILGFEITDEEIDLIPLSEFAQKALDNKNTKENILSVVHEACSACMQSQYFVTNMCRGCEGRPCLMNCPKAAISFKGGKACITQEDCVGCGLCSKVCPYHAIVYTPVPCEDVCPVKAITKGEDGTEHIDKDKCIYCGKCMQTCPYGAIMERSKVIDVYKSITAPDKKIIAIPAPAIYGQFNATPGQILSAIKAIGFDDVVEVALGAEDTSRNEAAEFLERMEEGKPFMTTSCCPAYVGWVDKHAPMVKPFVSDTRSPMVYAARRVKEQYPDAEVVFIGPCLAKRYEAEMYVPEVDYVMSFEELGAFMVAYDINPETCEELPLDPEVTKFARGYAQAG…	[FeFe] Group B	[FeFe] Group B	Evolving	Labile	1	[FeFe]-centre, 3 x [4Fe4S] clusters, 1 x [2Fe2S] cluster	None	3.57847	10.0374	2.36715	3.34938	3.09206	4.95918	4.85335	2.8497	4.437	2.9854	5.21821	27.7636	4.9039	14.9165
WP_006874781.1	METTERSFDTNVQLLKYKVIKGVVEHFDKGTLESAYRDIPLAIAPGPKPTMRCCVYKERAIITERVRMAMGGDHENPNAIEVIRIACDECTVNRYHVGSACRGCIAHRCEHACPTGAISVHDGKAHIDQEKCVECGRCATACPYSAIMKYTRPCENACKIKAISMHRDNSAKIDNDKCIACGACVYQCPFGAIVDKSFVLDALTMMRDSENNAKYRVYAVVAPSISSQFSYAKTGQVVTGLKKLGFHSVVEAALGADMVAYDEAAELAEKGFLTSSCCPAFVAYVKSAFPDLANHISHNPSPMEAVARFIKRTDPTARCIFVGPCTAKKMEFQQEACTGIDCVITFEELQALFDARGVTIEHLEESVLDNASYYGRIFARSGGLSDAVAQALKEHGISE…	[FeFe] Group B	[FeFe] Group B	Evolving	Labile	1	[FeFe]-centre, 3 x [4Fe4S] clusters, 1 x [2Fe2S] cluster	None	1.25805	4.20576	0	0	2.06137	0.826529	3.23556	1.42485	2.958	2.9854	4.17457	5.84497	3.67793	5.5937
WP_027207458.1	MRGIYTSVNDIRKRVFTEVARLSYNYKDGDLSEMEMIPYRIIPGEESKYRESVFLERAIVKERMRLAMGLSLRSAAEHAPVSTGAEECVKPEKYYQPPLINIIKFACNKCPDNVVTVSNQCQACLAHPCHEVCPRDAIKFDHGKSVIDQEKCIKCGRCIEVCPYNAIIRMERPCSKACGVKAIGTDEHGRADIDYDKCVSCGMCLANCPFGAIADKAQIFQTIQAIKSDTPVYAAIAPAIVGQFGPDLTLDKMRYAFKALGFEDAVEVAIGADLCTLQEADDFIKEVPEKLPFMGTSCCPAWSAMAKRDFPEQANCISMALTPMVLTGRLLKQQHPDCKIAFIGPCAAKKLEAMRKSVRSDIDFVLTFEEVMGMFEAKGVNFAEFETHNTMHGGSGDGR…	[FeFe] Group B	[FeFe] Group B	Evolving	Labile	1	[FeFe]-centre, 2 x [4Fe4S] clusters	None	0.814859	3.72119	0	1.11646	0	0.826529	0.808891	2.13727	0.739501	1.99026	2.08728	7.30621	3.67793	6.52598
WP_027640429.1	MGMEIIDFKATKCKHCYKCVRYCGVKAIQVKDERAVIMPDKCILCGHCLKICPQSAKTLKSDLNMVRGFLREGMRVVVSIAPSYMGLLKYKTIGQVRGALLRLGFEDVRETSEGAAFVTAEYAKLLAEHKMENIITTCCPSANDLVEIYYPQLIPYLAPVVSPMIAHGKLLKEELGRDVKVVFLGPCIAKKKEAMDLRHEGYIDAVLNFNDINKWLEEEDIVIGDCEDRPFTAFDPKVNRLYPVTNGVVNSVLATEEKGDGYRKFYVHGEDNCIDLCKSMSRGEIKGCFIEMNMCSGGCIKGPTVDEEFISRFKVKLDMEESICREPADEKQMEPVWENVNFRKRFEDHSPRDPQPTEEQIREILRMTNKLKPEDELNCGACGYPTCREKAIAVFQHKA…	[FeFe] Group C	[FeFe] Group C3	Sensory	Labile	3	[FeFe]-centre, 2 x [4Fe4S] clusters, PAS domain	Phosphatase, thioredoxin	1.95253	0.165855	2.36715	4.46584	1.03069	0	2.42667	1.42485	0	0.995132	0	0	0	0
WP_005944276.1	MSFRGINTTVIQIRRQVFTEVARMAYANVKGEQANHLMRKIPYTIIPGEEGKLRKDIFLERAIVEERVRLAMGLPTRRMDEHNSVVSGLEDASIADKYYDPPLVNVIKFACNRCPEKLVKVSDLCQGCLAHPCMEVCPKKAITWESGRSIIDQDKCIKCGRCVGVCPYNAIVKTERPCAAACGMGAIHSDELGRAEIDYSKCVSCGQCLVNCPFGAIADKGQIYQLIQGFNRGDRIYALVAPAFINQFPGLASTGKLKAALKAVGFYDVVEVAIGADLCTVDEAHDFLEEVPGKLNFMATSCCPAWSMMAKTAFPDLAKNISMTMTPMVFTARMMKQKDPEARMCFIGPCAAKKLEASRRTVRSDVDFVLTFEELAGIIEAKDVDTSLLEVDEAEALHA…	[FeFe] Group B	[FeFe] Group B	Evolving	Labile	1	[FeFe]-centre, 2 x [4Fe4S] clusters	None	7.18004	2.41752	10.6522	1.11646	13.3989	8.26529	3.23556	6.41182	4.437	0.995132	5.21821	2.92248	0	0.932283
WP_005679640.1	MAFTNNIMIVRHKLLADLVRLWKNDQLVEKIDRLPIELSPRKSKPLGRCCVHKERAVWRYKMFPLMGLDMTDEHDEVTPLSEYAQQALSRPEPDKENIMCVIDEACSSCIQINYEITNLCRGCVARSCYMNCPKDAIRFKKNGQAMIDHETCISCGICHKSCPYHAIVYIPVPCEESCPVKAISKDEHGIEHIDESKCIYCGKCMNACPFGAIFEISQTFDVLQRIRKGEKMVAIIAPSILGQFKTSIEQVYGAFKEIGFTDVIEVAEGAMSTTSNEAHELLEKLEKGQSFMTTSCCPSYIELVEKHIPGMKPYVSTTGSPMYYTARIAKEKHPDAKIVFVGPCVAKRKEVRRDEAVDYILTFEEVGSILDGLDIQLEQTQAFSILHTSVREAHGFAQA…	[FeFe] Group B	[FeFe] Group B	Evolving	Labile	1	[FeFe]-centre, 3 x [4Fe4S] clusters, 1 x [2Fe2S] cluster	None	2.14152	5.51198	3.55072	1.11646	2.06137	1.65306	1.61778	2.8497	9.61351	2.9854	3.13092	10.2287	2.45195	4.66141
WP_016266912.1	MAFTNNIMIVRHKLLADLVRLWKNDQLVEKIDRLPIELSPRKSKPLGRCCVHKERAVWRYKTFPLMGLDMTDEHDEVTPLSEYARMALNRPEPSKENIMCVIDEACSSCVQINYEITNLCRGCVARSCYMNCPKDAIRFKKNGQAMIDHDTCVSCGICHKSCPYHAIVYIPVPCEESCPVKAISKDEHGVEHIDESKCIYCGKCMNACPFGAIFEISQTFDVLQHIKKGEKLVAIIAPSILGQFKTSIEQVYGAFKEIGFTDIIEVAEGAMMTTSNEAHELLEKLEEGQKFMTTSCCPSYIELVEKHMTEMKPYVSTTGSPMYYAARIAKEKHPDAKIVFVGPCVAKRKEVRRDDAVDYILTFEEVGSILDGMDIQLEQVNSFSILHTSVREAHGFAQA…	[FeFe] Group B	[FeFe] Group B	Evolving	Labile	1	[FeFe]-centre, 3 x [4Fe4S] clusters, 1 x [2Fe2S] cluster	None	2.82334	9.93731	2.36715	1.11646	2.06137	3.30612	8.08891	0	7.39501	1.99026	8.34913	35.0698	1.22598	5.5937
WP_014903221.1	MSAACHIHTDIDKCQGCNNCIRHCPVHGNIAYLDTSGNVKVKISEENCIECGECLKVCSHSARYYQDDITSFFAELKGGSRVSILTAPAIRVNFPNYKRLFGYLKSLGAHAFYDVSLGADICTWAYLKTINEKNLKTLIAQPCPVVVNYIEKYVPELLEQLSPIHSPMMCTAVYIKQYVKDTSALAMLSPCIAKKTEFESTDNTISYNVTYNNLAKYLEAHNVNLNNYEEVEFNDLDCSLGLLFSRPGGLRENVEARNPDAWVRQVEGPQEACDYLKTYSSRLKQGKSAPLLVDILNCSHGCNIGTGTSLDKSVLDDIDNTLNSLKVVKREERVRNKHFSKMSRLNWLDEYFTKNLRLSDFFRAYDRNRALKPLSNPSESELNSIYIKMHKTTQEAKEL…	[FeFe] Group C	[FeFe] Group C2	Sensory	Labile	1	[FeFe]-centre, 2 x [4Fe4S] clusters, PAS domain	Fusion with methyl-accepting chemotaxis protein	21.5176	11.9557	27.2222	15.6304	16.491	23.1428	14.56	32.0591	8.87401	3.98053	15.6546	5.84497	15.9377	21.4425
WP_012738474.1	MVNLTINGKAVSVKEGTTILEAAKTIGETIPTLCYLKEVNAIGACRVCVVEVEGTDRCVTACNNFVEEGMVVYTNSRKVRTTRKTNVKLILSQHDYKCGTCIRSGNCALQSIANELNISEMPYDSILEKDNWDKTFPLIRDAQKCIKCMRCVQVCDNIQGMHIWDVVNTGSRTTVNVRANKNIAETACTLCGQCVSNCPVGALTERDDVGIVLDAIENEDIITVVQIAPAVRAAWGEDFGMSKEYATAQRLVAGLRRIGFDYIFDTTFAADMTIMEEGSEFLERLPEIKESGLPMFTSCCPGWVKFVKSEFPEMAGRLSTAKSPQQMFGAITKSYYAEKLGVDPEKIFCVSIMPCLAKKDECTWDGGKDVDAVLTTREVERMFKAFFIKPEELDEDEFD…	[FeFe] Group A2	[FeFe] Group A2	Evolving	Labile	2	[FeFe]-centre, 3 x [4Fe4S] clusters, 1 x [2Fe2S] cluster	NADH-dependent glutamate synthase	8.79798	3.13171	8.28502	6.69876	13.3989	5.78571	0.808891	17.8106	6.65551	0.995132	2.08728	2.92248	6.12988	0
WP_014115957.1	MRGIHSAVDDIRRNVFTEVARLAYEGGDYSRIDLIPYKIVPGEESQYRSNVFLARAIVQERLRLACGLPLQPVNVRAPASAGIEEAAAADDKFFEEPLVNVITFACNACPPKQVRVTDSCQGCMSHPCQVVCPKDAIYLDAQKRSHIDQSKCIKCGKCVNQCPYHAITKIERPCAAACGMDAIESDEKGRAKINYNKCVSCGMCLVNCPFAAIADKSQIFQIINAMKRHNKLIACVAPAFVSQFGKEVSPAKLKAAMRLCGFADVVEVAIGADLCTIEEAGDFLENVPKNQPFMGTSCCPAWSVMAKKLFPEFKDYISMALTPMVITARLVKKRYPDARICFIGPCAAKKLEANRKSVRSDVDYVLTFEELQGMFDAKDIDFSQLPEDPADDFTIGTGA…	[FeFe] Group B	[FeFe] Group B	Evolving	Labile	1	[FeFe]-centre, 2 x [4Fe4S] clusters	None	71.8013	40.1412	97.0531	60.2888	147.388	48.7652	21.0312	56.2815	47.3281	56.7225	50.0948	17.5349	31.8754	37.2913
WP_028726954.1	MAFTNNVMIVRHGLMAKLVRLWKENRLLDEIDRLPIELSPRKSKVIGRCCVHKERAVWKYKTLPLLGFDMQDEIDELTPLSEYAKRALLRPENKKENLMCVVDEACSSCVQVNYEITNLCRGCVARSCYMNCPKDAIQFKKNGQARIDHDTCISCGKCHQNCPYHAIVYIPIPCEEVCPVKAISKDEYGVEHIDESKCIYCGKCINACPFGAIFEISQVFDILQRLRNKEQMIAIVAPSILAQFSAPVEKVYGAIKAMGFEEIVEVAQGAMETTRREAEELKEKLEEGQPFMTTSCCPSYVQLAEKHIPDLKKYISSTGSPMYYTARLVKEKYPDCKVVFIGPCVAKRKEVKMDPAVDFTLTFEEIGSILEGLDIKVEEAKPFSILYNSVREAHGFAQS…	[FeFe] Group B	[FeFe] Group B	Evolving	Labile	1	[FeFe]-centre, 3 x [4Fe4S] clusters, 1 x [2Fe2S] cluster	None	21.3796	41.8358	13.0193	14.514	15.4603	35.5408	34.7823	14.9609	44.37	43.7858	26.091	102.287	23.2935	11.1874
WP_005931733.1	METKEITLQIDRHSITVPAGTTILEAATEIGINIPTLCHIDLKGTCIKNNPASCRICVVEVEGRRNLAPACATKCTEGMVVRTSTLRVMNARKVVAELILSDHPNDCLTCPKSGNCELQNLALRFNVREMPFNGGELSLRKREVTSSIVRNMDKCIFCRRCESVCNDVQTVGALGAVRRGFNTTIAPAFDKKMSESECTYCGQCVAVCPVGALTERDHTNRLLEDLDNPDKVVIVQTAPAVRVALGEEFGMPAGTQVTGKMVYALRELGFDYVFDTDFAADLTIMEEGTEVLERLGRFLNGDKNVCLPILTSCCPAWVNFFEHHFPDLLDIPSTARSPQQMFGSIAKTYWAEKMGIPREKLVVVSIMPCLAKKYECDREEFKVNGNPDVDYSISTRELA…	[FeFe] Group A3	[FeFe] Group A3	Bifurcating	Labile	2	[FeFe]-centre, 3 x [4Fe4S] clusters, 1 x [2Fe2S] cluster	NADH dehydrogenase	5.08617	11.8619	7.10145	5.5823	5.15343	5.78571	4.04446	2.8497	5.17651	16.9172	15.6546	24.8411	8.58183	0
WP_013708979.1	MADMMRGAYTGLAEIRRMVFREVAKLAYADADDDADYRWVDELPYRIIPGDVATYRESVFLERAVVGERIRLTMGLPLQDVDRPARLSEGVAAAARPETYYQPPLINVIKFACNACEEECYEVTNMCQGCLAHPCREICPTGAVTFVDKKAHIDKDACINCGRCASICPYTAIAHRERPCAAACGMNAIASDEWGRAEIDYDRCVSCGQCLVNCPFGAIADKSQIFQVIQAITTGDEVIAAVAPAFVGQFGGRGNVDKLREAFLRLGFCGMEEVAIGADLCTVQEAEYFVDEVPDKLPFMGTSCCPAWSVMAKREFPEHAQCISMALTPMVLTARLIRERHPDAKIVFVGPCAAKKLEARRTSVKSEVDFVLTFEEMAGMMEAKEIDYRQLSGDGSTDF…	[FeFe] Group B	[FeFe] Group B	Evolving	Labile	1	[FeFe]-centre, 2 x [4Fe4S] clusters	None	7.53372	3.67147	3.55072	8.93168	4.12275	9.91835	7.28002	11.3988	2.2185	2.9854	5.21821	2.92248	1.22598	7.45826
WP_010690649.1	MVNLTIDNIKISAKENMTIMEAAESAGIPIPKLCFLKGINEIAACRVCVVELEGKEKLITACNNSVEEGMVVYTNSPKVRIDRRRTVQMILSQHDCKCAICVRSGNCTLQTLANDLNIQDVLYEEQLEDQPWDKNFPLIRDSKKCIKCMRCIQVCDKIQSLNIWELEGTGARTTINVSGSRTIADADCSLCGQCITHCPVGALRERDDTEKFWRAVANPDKVVVVQVAPAIRTAWGEHIGLDLKDASVNKIFDALKRIGADYVFDTAFSADLTIMEEAYEFIERFSKGELKDKPMFTSCCPGWVRFIKSQYPHLVSHLSSAKSPMQMFGAVMKSYFAEKIGKKPEDIFSVAIMPCVAKKGEISMELFYGEYAGHDMDCVLTTREFVRMIKSAHILPETL…	[FeFe] Group A2	[FeFe] Group A2	Evolving	Labile	2	[FeFe]-centre, 3 x [4Fe4S] clusters, 1 x [2Fe2S] cluster	NADH-dependent glutamate synthase	0.510045	2.72314	0	0	0	0.826529	0.808891	1.42485	5.91601	0	4.17457	4.38373	0	1.86457
WP_012742086.1	MRLLILSDTIRKIEILFYKEESIMRGVETRIQEIRHKIFTEVARMAYHTEWPVKDRMEALPYKIIPGEKGNFRNDVFLERAIVGERLRLAMGLPYRSAAEHSPISDGIEAADKDETYYTPPLINVIKFACNACPEKRVHVTDGCQGCLAHPCMEVCPKDAVSLDRTTGKSVIDQEKCIKCGRCASVCSYNAIIVQERPCAKACGMDAISSDENGKANIDYDKCVSCGQCLVNCPFGAIADKSQIFQTIRAIQSGEKVYAAVAPAFVGQFGPKVTPGKLRAAMKALGFADVFEVAIGADLCAKQEAEDFLKEVPDELPFMATSCCPAWSVMAKKLFPEHAKCISMALTPMTLTARLIKQHNPDARVVFIGPCAAKKLEAMRRSVRSEVDFVLTFEEMTGI…	[FeFe] Group B	[FeFe] Group B	Evolving	Labile	1	[FeFe]-centre, 2 x [4Fe4S] clusters	None	8.00479	4.11037	2.36715	6.69876	4.12275	8.26529	13.7512	12.8236	4.437	1.99026	5.21821	4.38373	4.9039	3.72913
WP_028044437.1	MRGVYSSVTDIRRKIFTEIARMAYNGDYSVIEELPYKIIPGEVATYRESIFLERAIVGERLRLAMGLPLRPIDQHTILSTGITNSIIAEKYYEPPLINIIKFACHACPDNIVKVTDACQGCLAHPCKEVCPKNAIQIVNGRSVIDQDKCIKCGLCIKNCPYGAIMKMERPCAKACGMDAIKTDEHGHADIDYDKCVSCGMCLVNCPFGAISDKGQIFQLITAMKEGYKVYAAVAPAFVGQLGPKVTPEKLKGAMKTLGFEDTIEVAIGADLCTVEEAEDFLSKVPQEQPFMGTSCCPAWSVMAKKLFPEFKPYISMALTPMVLTARMIKKDHPDCKVVFIGPCAAKKLEASRKSVRSDVDFVLTFEEIMGMFEAKDIHFEDLTEVEQLGEASADGRGFA…	[FeFe] Group B	[FeFe] Group B	Evolving	Labile	1	[FeFe]-centre, 2 x [4Fe4S] clusters	None	30.149	17.6241	40.2415	30.1444	53.5957	26.4489	10.5156	19.9479	18.4875	19.9026	28.1783	16.0737	14.7117	8.39055
WP_006571748.1	MRGVETRIQEIRHRIFREVARMAYHTEWPVDKRIEELPYKIIPGEVGNFRNDVFLERAIVGERLRLAMGLPCRSAAEHAPLSDNIEAADKDETYYTPPLINVIKFACNGCAEKKVMVTEGCQGCLAHPCEEVCPKDAIKLDRYNGRSHIDQDKCIKCGRCADVCSYKAIIIQERPCAVACGVDAIHTDINGKAEIDYDKCVSCGMCLVNCPFGAIADKSQIFQVIRAIQSGERVYAAVAPAFVGQFGPKVTPGKLRAAMKQLGFADVFEVAVGADLCATQEAEDFIREVPNELPFMGTSCCPAWSVMAKKSFPDHANCISMALTPMTLTARLIKHNHPNGKVVFIGPCAAKKLEAMRKSVRSEVDFVLTFEEMAGIFDAKHVDLATIEEDPTGVNDAST…	[FeFe] Group B	[FeFe] Group B	Evolving	Labile	1	[FeFe]-centre, 2 x [4Fe4S] clusters	None	5.73145	1.82906	11.8357	14.514	1.03069	0.826529	4.04446	2.13727	0	2.9854	1.04364	2.92248	1.22598	2.79685
WP_022739883.1	MSKATVIPFGPQHPVLPEPLHLDLVVQDETVVDVLPQIGFVHRGLEKLVETRDYNQFIYIAERICGICAMGHSLGYAETVESLMGVEVPKRAEYLRVIWHELSRIHSHLLWLGLAADAFGFESMFMHCWRLRERVLDLFEKTTGGRVILSVVKVGGVVRDIDANQMAEIVSVLDGIKDEYTQIMNTLLTDTSVKNRTVGVGHITTEDAAALSMVGPFARASNLPYDVRSFGRGAYGDLADFAPITATEGDCYARVKVRCLEVLQSIEIIKELGAKIPAGDIEVAVKGAPADGAQASNVLEQPRGECYYYARGNGSKNLERMRMRTPTSQNLAGMTVALKGCDLADVNMIILTIDPCISCTER	[NiFe] Group 4e	[NiFe] Group 4e	Evolving	Sensitive	6	[NiFe]-centre, 1 x [4Fe4S] clusters	NuoL, NuoH, NuoC, [FeS] protein	2.1958	0.495176	2.36715	3.34938	1.03069	2.47959	3.23556	0.712424	0	0.995132	1.04364	0	0	0.932283
WP_006874783.1	MNDVLSLKKANCKNCHKCIRSCPVKSIRFSDNQAKIIPEECILCGRCVVVCPQNAKRVRNDLTEVIGAIGSGKRVIAALAPAFISEFPVSGIEEMEELLKKFGFFAAREVAQGAYIVKSDYERMIREKTQDVIISSCCHTVVTLIQKYYPAVIPYIAPIISPMMACARQIKQEYPDAYVVFIGPCISKKDEMEKLPGYVDCVLTFDELWQWFEKRGIVLQKQEVDAQGGRASRFFPRTGGIIACMHTEESTYKYIAVDGVENCVQAIKEIERGGLKGYFVEMSACEGSCINGPSTRAYRDNILTSRARVDEYAQPDMHQKPDFDAACEFGLSRHIANEFVHEPEPPEATIIEILARMGKTRPEHELNCGSCGYPTCREKAKAVYNGKADITMCLPYLLE…	[FeFe] Group C	[FeFe] Group C3	Sensory	Labile	3	[FeFe]-centre, 2 x [4Fe4S] clusters, PAS domain	Phosphatase, thioredoxin	0.949645	2.83745	3.55072	1.11646	1.03069	0	0	0	2.958	4.97566	2.08728	1.46124	3.67793	1.86457
WP_022187469.1	MLTPKNNLFPIRNDILARVAASFFADRFAHIDDVPAQVLPDGSQCYHCNIENDRDIVRQICMAVLGFSPADEEGSKRPLHDYAAQALKREKLEPSKISVINSACMACRKERYIVSDLCRACIARPCQVNCPKNAISFVNGKAFIDQDLCIKCGRCHDVCPYSAIIKNVIPCEDSCPVGAITKDQAGKEHIDPEKCISCGKCLKSCPFGAIVERSQMVDVLKAMHETDKQVIAMVAPAIIGQFGGTVNNLVGALKAAGFDDVIEVAVGADITTKNEAAEFIERMEEGKKFMTTSCCPAYYRAAQLHIPEIKEYVSSTKTPMYYTAELVKKEHPQSVAVFVGPCFAKRVEAETDPNVDYVLTFEEMNAIFSGANINVATAEPAEFTTVSCAQGRGFPLTGG…	[FeFe] Group B	[FeFe] Group B	Evolving	Labile	1	[FeFe]-centre, 3 x [4Fe4S] clusters, 1 x [2Fe2S] cluster	None	1.74396	7.89335	0	0	0	6.61223	2.42667	1.42485	5.91601	11.9416	0	24.8411	0	4.66141
WP_024622238.1	MVKLKINNTEIEVAEGTTILEATKSAGMSIPSLCYLKGINEIGACRVCVVEMKGKEKLITACNNIVAEGMDISTNSPRVREARRTNVELILSQHDCNCPTCVRSGNCELQTLANNLNFPENHYKLEVLHSNWPKDFPLIREEGKCIKCMRCVQVCDKIQDQHVWDIAQTGSRTTVDVSLNRDIKDADCSLCGQCITHCPTGALHERDDVGKILRMNGVLNDPDTITIIQVAPSVRTAWGEALGLPREFATVKRLVSALRKMGFDYIFDTDFSADLTIMEEGSEFLERLKSGKKSVYPMFTSCCPGWVRFLKSQYPDMVDSLSTAKSPQQMFGAVAKSYYADILGVDPSKICCISVMPCVAKKHECDIPNINDSGAEKDVDFVWTTREVVRLIKSEHIDV…	[FeFe] Group A2	[FeFe] Group A2	Evolving	Labile	2	[FeFe]-centre, 3 x [4Fe4S] clusters, 1 x [2Fe2S] cluster	NADH-dependent glutamate synthase	3.30813	0.915617	2.36715	0	4.12275	2.47959	1.61778	9.26151	1.479	0.995132	2.08728	0	0	0.932283
WP_011993425.1	MVTVYINDKPYEVSENKTVLEVAQELGYYIPTLCHHPELEPIGACRICVVEVEGARTLQPACTTKVSDGMKIRTNTERVESAVKFNLSLIMANHPHECMYCEADGRCELQKLVHMYDIKPIFGVNVDMDKEIDISSPSINRELSKCIKCQRCVRVCSEIQGMNIYSMVDRGYESLPETEFGIPVYETNCISCGQCAYLCPVGAIYEAPDWKKVLNLLNKKEPGKVYVAQTAPSVRVAIGEEFGVEPGTVSTGKMVAALRRLGFDYVFDTNFAADLTIMEEGYELIHRLQNGGKFPMFTSCCPGWVNEMEKEWPELRENLSTAKSPQQMMSSVVKTYFAQKIGVKPEDIVMVSVMPCTAKKDEITRPQQLVDGIKVTDYVITTRELGKLIKLKGIPFVNL…	[FeFe] Group A1	[FeFe] Group A1	Evolving	Labile	1	[FeFe]-centre, 3 x [4Fe4S] clusters, 1 x [2Fe2S] cluster	None	2.19134	0.339796	0	1.11646	1.03069	7.43876	0	3.56212	0	0.995132	1.04364	0	0	0
WP_006573275.1	MEQKMVNLKIDNIPVSVPAGTTVLEAARNAGIKIPSLCFLKEINEIGACRICVVEVKGAKSLVASCVYPVSEGMEVFTNTEKVRHSRQLTLELILSNHRMDCLTCSRSGRCELQDLARDLGIDAVRYAADNLPPQIEDSAPHLIRDNSKCVLCRRCTAVCRKSQEVGVIGCNDRGFATHVGCAFDRDLNEVDCVSCGQCIVACPTGALQEKDDTAKVWAALNDPTKHVVVGPAPSIRVTLGECFGMPIGTNVEGKMVTALRRLGFDKVFDVDNAADFTIMEEGTEFLHRLQNGGTLPLITSCSPGWIRFCEQHYPDMVPNLSSCKSPQQMFGTLVKTYYAEKMGINPRDIFVVSIMPCTAKKYEVRREEMRQHGWLPVDVSLTTRELGRMITRAGLLFQ…	[FeFe] Group A3	[FeFe] Group A3	Bifurcating	Labile	3	[FeFe]-centre, 3 x [4Fe4S] clusters, 1 x [2Fe2S] cluster	NADH dehydrogenase, thioredoxin	34.0028	63.2096	31.9565	82.6181	27.8285	16.5306	31.5468	13.5361	28.101	68.6641	67.8367	36.5311	152.021	26.1039
WP_006874974.1	MTRDKTGRSCKMRGIYTSVTDIRRKVFTEVARLAYEGGDYSRIEGLPYKIVHGETAQYRDSIFLERAIVGERLRLAIGLPLRPMDEHAPVSMGINQSAVAEKYYDPPLVNIIKFACNACPEKQYRVTDCCQGCLAHPCKEVCPRDAVSIVHGKSVIDQEKCIKCGRCAEVCPYGAILKLERPCASACGMDAISSDEHGRAVIDYDKCVSCGMCIVNCPFGAISDKGQIFQVIQSIKKGDRVIAIVAPAFVGQFGPAMTPEKFTAAMKQLGFDSVVEVAIGADLCTIEEAKDFMRAVPEEQPFMATSCCPSWSVMAKKLFPTLAPYISMALTPMVLTARLQKKEHKGCKIVFVGPCSAKKLEASRRTIRSDVDFVLTFEELMGMFVAKGVKFGDIKEEKP…	[FeFe] Group B	[FeFe] Group B	Evolving	Labile	1	[FeFe]-centre, 2 x [4Fe4S] clusters	None	22.043	32.5159	24.8551	27.9115	38.1354	14.8775	12.9423	13.5361	25.8825	49.7566	28.1783	29.2248	29.4234	32.6299
WP_008025884.1	MAFTNNIMIVRHKLLADLVKLWKNDELVEKIDRLPIELSPRKSKPLGRCCVHKERAVWRYKTFPLMGLDMTDEHDEVTPLSEYARLALSRPEPDKENIMCVIDEACSSCVQINYEITNLCRGCVARSCYMNCPKDAIRFKKNGQAMIDHDTCVSCGICHKSCPYHAIVYIPVPCEEACPVKAISKDEHGIEHIDESKCIYCGKCMNACPFGAIFEISQTFDVLQRIRKGEKMVAIIAPSILGQFKTSIGQVYGAFKEIGFTDVIEVAEGAMATTSNEAHELLEKLEEGQKFMTTSCCPSYIELVEKHIPDMKPYVSTTGSPMYYAARIAKKKHPDAKVVFVGPCVAKRKEVRRDEAVDYILTFEEIGSILDGLGIELEQVQEFSVLHTSVREAHGFAQA…	[FeFe] Group B	[FeFe] Group B	Evolving	Labile	1	[FeFe]-centre, 3 x [4Fe4S] clusters, 1 x [2Fe2S] cluster	None	1.13429	3.19836	1.18357	1.11646	2.06137	0.826529	1.61778	0	5.17651	2.9854	1.04364	2.92248	6.12988	0.932283
WP_008409712.1	MLKQVVYTDKERCRLCSACLQVCHTKSIKTDQGKAEIIADSCLSCGLCIGVCSKGAKRYLDSTQAVQQLLAARQCALVLAPSYVIVAKKRYGCSPEQFAAAMKKLGFSLVYEAGFGADVVTKVYLDYLAQRINEKGRENTHVITSPCPSLMNYVEKHVPELIEEFAPVLSPMAAQALLVKHWTKDKAAIIGASPCVAKKSELLDEQLGLFDAVLRFEELCNWLDNANIKPSVLPPIEGDGIEALYGAGFPISGGLTKTLEQFSGKLELNPIGDDILILEGEDRSIEFLKHMALDKKKDNNLKGYPLLIDILYCEGCIVGKAMGVKGSLLENKKIVADYTRHRFAKMQKKGLFKKYNGYRFVVKNTVQAPEFKEWLAVVEKLIQEKRFWRSWQNRKYMRK…	[FeFe] Group C	[FeFe] Group C3	Sensory	Labile	2	[FeFe]-centre, 2 x [4Fe4S] clusters, PAS domain	Histidine kinase	1.80579	4.65484	2.36715	2.23292	0	2.47959	1.61778	2.13727	6.65551	0.995132	2.08728	1.46124	3.67793	13.052
WP_033162999.1	MVNNVRIWIDGHSYHVPERTTILDAAKMAGIQIPTLCYWKGLNEIGACRVCVVEVEGYERLFTACNNTVDEGMVIWTNSKKVREARIVNVQLILSQHNANCTMCTRSGNCSLQKVANDLGIMDSPYKKDIPAQKGNPNFPLIRDYTKCIKCMRCIQVCDKIQNSHIWDVVNTGSRTTVDVRDVYSLEDSKCALCGQCITHCPVNALHERDDTDSVYEAIDDPKKVVIAQIAPSIRTAWGEEFGLSPDVATVERLAEALHMIGFDFILDTDFSADLTIMEEASEFLDHLQHPTDHKFPMFTSCCPGWVRFVKAHYPEFVDQLSTSKSPQQMFGAIAKSYYAKLLQVEPENIYSVSIMPCLAKKQECDIPVMNDACGDPDVDVVLTTREVNRMIRRAYIIP…	[FeFe] Group A2	[FeFe] Group A2	Evolving	Labile	2	[FeFe]-centre, 3 x [4Fe4S] clusters, 1 x [2Fe2S] cluster	NADH-dependent glutamate synthase	0.428273	1.8907	0	0	1.03069	0.826529	0	0.712424	1.479	2.9854	1.04364	0	4.9039	0.932283
WP_014080084.1	MAGYVYTNENCIGCNRCISVCPVLTANQAVVVDGKPRIEVNHAQCINCGACFDACEHQAREYADDTEQFFADLQRGESISLLLAPAFLANYPREYEQILGGLRQMGAKRIISVSFGADITTWAYINYITKNQFTGGISQPCPAVVNYIEMYAPELLPKLMPVHSPMMCAAIYAKKYLHITDKLAFISPCIAKKNEISDPDTDGYVSYNVTFDHLMDYCRKHRISGPGVSDEIEYGLGSIYPMPGGLKENVYWFCGEDVFIRQIEGERHVYEFLDAYRKRVAEHKELPFMVDALNCAMGCIYGTGVEPEKTAGDDVLYELHKIREKSKKVKGPWARSATSKQRLAQLNRQFAQLEPADFTRRYTDRSKGNEIRVPEGQELEAVYSRLNKQTAMDRAIDCS…	[FeFe] Group C	[FeFe] Group C2	Sensory	Labile	1	[FeFe]-centre, 2 x [4Fe4S] clusters, PAS domain	Fusion with methyl-accepting chemotaxis protein	89.4487	60.9575	68.6473	65.8711	65.964	94.2243	129.423	112.563	67.2946	23.8832	60.5312	40.9148	64.9767	108.145
WP_018336996.1	MENNITLKIDNREISVPKGTTILEAARELGIDIPTLCYMNLKDLCIKNAPASCRICVVEVEGRKNLAPSCATRCENNMVVRTNTMRVLNARRVVLELMLSDHPSDCLVCAKSGNCELQDTAIKLGIREIPFAGEKSEFKVDLSPSIRRDASKCIYCRRCEMMCNDVQTVGALGAVNRGFSSVVMPAFDEALIDSECTFCGQCVAVCPVGALTELSHTNRLINDLANPSKTVIVQTAPAVRAALGEEFGLPAGTSVTGKMVAALRQLGFAKVFDTDFAADLTIMEEGTELLGRLNAFLNGDKEVKLPIITSCCPGWVNFFEKQFPDLLDRPSSARSPQQMFGAIAKTYWAEKMGIKREDLIVVSVMPCLAKKFESERDEFKTNGDPDVNYSISTRELAAL…	[FeFe] Group A3	[FeFe] Group A3	Bifurcating	Labile	3	[FeFe]-centre, 3 x [4Fe4S] clusters, 1 x [2Fe2S] cluster	NADH dehydrogenase, thioredoxin	2.1314	4.95941	2.36715	2.23292	1.03069	3.30612	2.42667	1.42485	2.958	2.9854	2.08728	14.6124	2.45195	4.66141
WP_013380841.1	MRGIYTPVTKIRRQVFAAIAKMAYEGGDYASRVEEIPFEIIPGEVANYRDSVFKERAIIGERLRLAIGLPLYPVDQPSPISRDVEESAIAEKVYDPPLVNVIPFACDACEPKAFMVTDNCRGCLAHPCVSVCPVNAVYMKDGKSHIDKEKCVRCGRCREACPYEAIVKYDRPCAAACGVDAIESDELGRAKINYDKCVSCGMCLVNCPFGAIADKTQIFQLIHAIKEGDEVIAEIAPAFVGQFGPLATPEKIKEAIKALGFADVVEVALGADLGAVEEAHHYVNKVVKGDDPFIGTSCCPSWSVMAKTKFPEIAHCISGELTPMVATARIIKKEHPKSRIVFIGPCAAKKLEASRKSVRSDVDFVITFEELMGMFVAKGIEFGDLEDDGRLDDATAAGR…	[FeFe] Group B	[FeFe] Group B	Evolving	Labile	1	[FeFe]-centre, 2 x [4Fe4S] clusters	None	18.9666	12.2638	24.8551	13.3975	35.0434	17.3571	8.8978	14.2485	11.832	14.927	13.5673	7.30621	11.0338	14.9165
WP_028529172.1	MVTITINGKKMQVEEGTTILKAAAAAGMPVPSLCYLKEINEIGACRVCVVEVKGVARLVTACNNLVQNGMEILTNSPRVRQARRTNVELILSQHNSSCTSCVRGGNCSLQRIANDLGIYASEYTKVIPKKHWPVSFPLIRDSSRCIKCMRCLQICDKVQDLHVWDIAKTGSRATVGVSHNLQITEADCAICGQCLTHCPTGALRERDDTLKLLSAQGAFADPEKVTIVQVAPAVRAAWGEELGLTREEATPKRLVAALKALGFDYVFDTDFGADLTIMEEGSEFLERLNHRDDYKFPMFTSCCPGWVRFLKSQYPEMTGQLSTAKSPHQMQGAVTKTYIAEKFGIDADRIFNISIMPCIAKKQEAEIPNINDSGHGRDVDLVLTTREIARMIRADHLDV…	[FeFe] Group A2	[FeFe] Group A2	Evolving	Labile	2	[FeFe]-centre, 3 x [4Fe4S] clusters, 1 x [2Fe2S] cluster	NADH-dependent glutamate synthase	3.2542	1.1449	4.7343	3.34938	1.03069	4.13265	4.85335	1.42485	0.739501	0	0	0	6.12988	0
WP_003499089.1	MPIIDFKAAMCKHCYKCVRDCEVKSIMIRDGHAYIMPNRCILCGQCLISCPQSAKKMSSELEKVKSFIKEGRPVILSLSSAYIGLFQYKTRGQVKDALLKLGFTDVRDTAEAAAMATGEYVKLLEKGDMKNIITTACPSIVSLIEIHYPELIDYLAPVLIPSGIHARMLGEEYGEEARIVFAGPCIAEKEKMRAVSPDAVLTFEELKGWLEEEEIKIDECEDADFDERHLGANLRYPVSGGLLTSVETTKTKPDRYRKFYVSGVKDCLDVCEAMMTGEVKGCFIEMNACHGGCINGPATAATVSSFKVKLDLEATLPREPAELSALSEKARAVSIGRTFKNRARKEIMPTEEEIREILIKTGKTRPEQELNCGACGYPTCREKAIAVCQKKAELNMCIP…	[FeFe] Group C	[FeFe] Group C3	Sensory	Labile	3	[FeFe]-centre, 2 x [4Fe4S] clusters, PAS domain	Phosphatase, thioredoxin	3.22431	0.69733	4.7343	8.93168	0	0.826529	4.85335	0	2.958	0	0	0	1.22598	0
WP_004610270.1	MRGIYSSLTKIRRKVFVEVAKLAYEGNDYSRIEDLPYKIIPGEVATYRDSIFLERAIVGERLRLTMGLSLRPIDEPAPISKGIEESIIADKYYEPPLINIIKFACNKCEENKYEVSNGCQACLAHPCIEICPKNAISFKNGKAYIDQDKCIKCGLCKNNCPYDAILKKERPCAKACGMNAIESDEYGNAHINYDKCVSCGMCLVSCPFGAIADKSQIFQLIQAIKNGDEIIAAVAPAFIGQFGPKVTPEVLKKAMRELGFKDVVEVAIGADLCTIDEANDFLEKVPEKQPFMATSCCPSWSMMAKKEFPEFKSYISMALTPMVLTARLIKEKHPNSRVVFIGPCAAKKLEASRKSVRSEVDFVLTFEEVGAMFEAKGIDLSTLEADPNDSFTQASGDGR…	[FeFe] Group B	[FeFe] Group B	Evolving	Labile	1	[FeFe]-centre, 2 x [4Fe4S] clusters	None	2.12373	4.37093	1.18357	4.46584	3.09206	2.47959	0.808891	0.712424	3.6975	10.9465	4.17457	0	3.67793	3.72913
WP_004611441.1	MVNLTIDGKQITVKENTTIMEAAAQNGIPIPHLCYLKGINEIAACRVCVVELEGKERLITSCNNVAKEGMVIYTNSPKVRRHRKTNVELILSQHNCECVTCPRSGNCMLQTVANDLNILEIPYRMQLEKQMWNKEFPLIRDSSKCIKCMRCIQVCDKVQSLHIWDVEGTGSRTTVNVSGHKTIEESACSLCGQCVTHCPVGALRERNDTEKVWEALSDPNKIVVTQVAPAVRTAWGEEFGLQPNEATVGMILDALKKMGADYVFDTCFSADLTIMEEATEFIQRFTSGELKDRPMFTSCCPGWVRFAKSQFPHMVKYVSSAKSPQQMFGTVMKTYFAQKLGVSPEQIFTVSIMPCLAKKGEQEMELFHGEYAGKDIDVVLTTREFVKMIRAAHISPETL…	[FeFe] Group A2	[FeFe] Group A2	Evolving	Labile	2	[FeFe]-centre, 3 x [4Fe4S] clusters, 1 x [2Fe2S] cluster	NADH-dependent glutamate synthase	5.73021	3.18741	1.18357	4.46584	2.06137	10.7449	8.08891	7.83666	2.958	2.9854	2.08728	5.84497	2.45195	2.79685
WP_007047054.1	MVNITVNGTAVQVPEGTTILNAAKAAGVDIPHLCYLKDLNEIGACRVCCVEIEGERNLVPSCNNPVFEGMAIRTNTDRVRRTRRINVELILSQHDCHCATCPRSGNCHLQNVANDLGILENPYPSDLVTGARAQWPRDFPLYRDTNKCIKCMRCIQVCDKIQGVHVWDLSGTGSRTRVDVSGNRRIKESDCVLCGQCITHCPTGALRERNDTQRAFDAIADPEKITVVQIAPAVRTAWGETLGLTPEQATVHRMAACLRRLGFDYVFDTSFSADLTIMEEGTEFLHRYQAGETRDLPMFTSCCPGWVRYLKSHYPQWTDRLSTAKSPQQMFGAVTKNYFAQKLGVSPDKIYCVSIMPCIAKKQECDLPTMHTEAGKDVDLVLTTRELVRMIRAERLHPE…	[FeFe] Group A2	[FeFe] Group A2	Evolving	Labile	2	[FeFe]-centre, 3 x [4Fe4S] clusters, 1 x [2Fe2S] cluster	NADH-dependent glutamate synthase	6.04316	2.52438	8.28502	2.23292	2.06137	4.13265	14.56	4.98697	0	3.98053	6.26185	0	4.9039	0
WP_004614049.1	MLFIKSNRGGKMMENVTIKLNGRAVSAPVGSTILEAAHLAGIKIPTLCFLKEINEIGACRICVVEVKGAKTLVASCVHPIGDGMEIWTNTPKVLEARRKTLQLILSAHDRKCLSCVRSGNCELQQLCRELGVAEEDYFDGEKNGYELDVTAAHMIRDNNKCILCRRCSAVCEKVQGIGVIGPNHRGFATSIGSAFEMGLGDTSCVSCGQCIAVCPTGALQEKDYIDEVLEAIADPEKHVVVQTAPSVRAALGEEFGYPIGTDVEGRMVAALRRIGFDKVFDTDFSADLTIMEEAREFIDRVQNGGVLPLITSCSPGWIKYCEHYFPDMTENLSSCKSPQQMFGAITKTYYAEKTGMDPKDIVCVSVMPCTAKKFEIGREDQNAAGVPDVDIAITTRELA…	[FeFe] Group A3	[FeFe] Group A3	Bifurcating	Labile	3	[FeFe]-centre, 3 x [4Fe4S] clusters, 1 x [2Fe2S] cluster	NADH dehydrogenase, thioredoxin	4.92702	9.15016	3.55072	8.93168	1.03069	5.78571	2.42667	7.83666	8.87401	1.99026	7.30549	14.6124	18.3896	3.72913
WP_019893070.1	MRGVYNSVTDIRRKVFAAIAEMAYEEDVNYTERLESIPYEIIEGKQAKYRDSIFLERAIIGERLRLGMGLPVRDITTAGAISDGVEESIIAEKFYDQPLINIISFACHACPEKKVMVTDGCQGCLSHQCVEVCPKKAVSIVNGRSEINQDLCIKCGKCQDVCPYNAIIKIERPCAASCGMNAITSDEDGKAKINYDKCVSCGQCLVNCPFGAIVDKGQIFQTIYAMREHEVIAAVAPAFIGQFGANVTPEQVIGGLKELGFADVVEVAIGADLCTIEEAEDFLKKVPEELDFMATSCCPAWSVLAKKEFPQFKDNISMALTPMVLTARMIKKDHPNAKVCFIGPCAAKKLEASRRSIRSDVDFVLTFEEVMGMFSAKKIDLPTITCEETFDKATAAGRE…	[FeFe] Group B	[FeFe] Group B	Evolving	Labile	1	[FeFe]-centre, 2 x [4Fe4S] clusters	None	3.38708	6.01009	1.18357	4.46584	8.2455	2.47959	3.23556	0.712424	4.437	11.9416	6.26185	2.92248	4.9039	5.5937
WP_006442325.1	MRVIDFKDASCRHCYKCVRNCEVKAISVQNEQAHIMKDHCINCGHCLEVCPQNAKTFASDMERVKGYLKQGMKTVISIAPSYLGVLEYEKPGQVVDALLKLGFYEVRETAEGAALVTQEYRKLLKDGTMKNIITTCCPSVNDLIEKYYPALTGQMAPVVSPMIAHGRLIKQIYGEDTKVVFLGPCIAKKEEAVGDKRVIGAVDAILTFEEITKWWAAEGIDVNACEDRPLGNPDPRVNKLYPVGGGIVKSILADSVEDNYYKVYVDGLKPCMELFEELMKGEISDCFFEVNVCEGGCIKGPASDKWQQTVIKAKMNVEDQVGHREPAEGIDGSSISMEKQFHDRHVADRMPDGSEMRDVLKAMGKYTAEDELNCGACGYPTCRAKAVAVYQKKAEIGMC…	[FeFe] Group C	[FeFe] Group C3	Sensory	Labile	3	[FeFe]-centre, 2 x [4Fe4S] clusters, PAS domain	Phosphatase, thioredoxin	5.44606	9.21112	3.55072	5.5823	11.3376	1.65306	4.85335	5.69939	15.5295	2.9854	5.21821	14.6124	12.2598	4.66141
WP_007656801.1	MEDTKFYHALKIDKERCIGCTHCMTKCPTRAVRIRDGKAVIRKDWCVDCGECLKACPTEAIYVEQDDFQKIFDYECRVALVPTVFIGQFSKYTTEEEIFSALYELGFTHVYQVEFTADMIHREMLRQMEQAEEKPVISSFCPAIVRLIQIRFPALVDNILLVKSPVNATATYYHQVLTEEGHSPDQIGLFYVTPCAAKIAALKSADGYSSTINGVINMDTLYNKVYHILQNRPKGYKPDCVLPPTLTKKEMRWSQTGGEAKHFSGRCLAIDEIHNVIDFLERMETTTEVRNVDFLELRACDRSCAGGVLAVANRFLTAERIMKRSMKRDKAPLIYASERLGALAYLKQHITIRPLQPNPKLLYDGSIEEVLKKMEQVRRLMCYLPGIDCGACGNPNCQS…	[FeFe] Group C	[FeFe] Group C1	Sensory	Labile	2	[FeFe]-centre, 2 x [4Fe4S] clusters, PAS domain	Histidine kinase	18.3886	28.8191	13.0193	8.93168	10.3069	29.7551	34.7823	13.5361	33.2775	30.8491	19.8292	58.4497	18.3896	12.1197
WP_012635578.1	MSDKVNITLDGKSLTVDKDKTILEVAREAGIKIPTLCYLEEINEIGSCRVCVVEVNGKIQPACVTPVSEGLEITTTSPRIREARRISLELIISDHPMECLTCSRNGNCELQRLAEDFGISEITYEGEQSHFEPDLSSPSIVRDPDKCILCRRCVSVCEQVQGVAALTPNERGFSTIITPAFGQKLGEIACANCGQCINACPVGALSEKDDTEKVWEALANPDKHVVVQTAPAVRVSIGEVFGMKPGSLVTGKLMAGLRRLGFDKVFDTNFTADLTIMEEGHELIERLKNNERLPLITSCSPGWIKFIEHFYPSYLEHISSCKSPQQMFGALAKTYYPENNGIDPEDVFVVSVMPCTAKKFEITRPGMDSSGYQDVDVVLTTRELAKMFKQAGIDFVNLP…	[FeFe] Group A3	[FeFe] Group A3	Bifurcating	Labile	3	[FeFe]-centre, 3 x [4Fe4S] clusters, 1 x [2Fe2S] cluster	NADH dehydrogenase, thioredoxin	2.04927	0.408659	2.36715	0	1.03069	0	8.8978	0	0	0	0	0	2.45195	0
WP_015359535.1	MRKFDTKVQHLKYKVLKEVARLAWNDTLLENLMDIPQMIIPGKTPTMRCCVYKERAIVAERVKLAMGGNKDNPNVIEVIEIACDECPMGGYEVTNACRGCLAHRCEDACKFGAIYFDQNHVAHIDKTKCRECGACSRVCPYSAIISLRRPCENACKIKAIHMSEAKTAAIDNKKCIACGACVYQCPFGAIMDKSYILDAIDIIKKSDNNRKYKVYAVVAPSISSQFTYAKLGQVITGLKELGFYTVIEAALGADMVAYSESRELVEKGFLISSCCPAFVSYVEKNFPGLAPSISHNLSPMATIAKYLKEREKNCKVIFIGPCTAKKAEVQKESVRPYVDVVLTFEELQALFDSKDIDITTLPEDVLDNASYYGRIFARSGGLTDAIAEGLKEHGFTDFE…	[FeFe] Group B	[FeFe] Group B	Evolving	Labile	1	[FeFe]-centre, 3 x [4Fe4S] clusters, 1 x [2Fe2S] cluster	None	10.2263	6.30932	9.4686	14.514	6.18412	13.2245	7.28002	10.6864	12.5715	6.96593	1.04364	5.84497	4.9039	6.52598
WP_022418160.1	MRKFDTKVQHLKYKVLREVAKQAWADTLQDNLLDIPKIIVPGKIPTMRCCVYKERAILAERVKLAMGGNKQNPNVIEVLDIACDECPMGGYEVTNACRGCLAHRCEDVCKFGAITFDENHVAHIDKTKCKECGACSRVCPYSAIHNYRRPCETACKVKAIYMGDEKQACIDNGKCISCGACVYACPFGAINDKSFILNVIDMLKGSNGNRDYKIYAIVAPSISSQFTYAKLGQVITGLRKLGFHTVIEAALGADMVAQAESKELVEKGFLTSSCCPAFVDYINKNFPELKQFVSHNLSPMATIAKYIKSKEANCKTVFIGPCTAKKMEVQKESVKPYVDAVLTFEELQALFDSKEIDITTLEEGVLDNASYFGRIFARCGGLADAVAEGIKEQNLEFAL…	[FeFe] Group B	[FeFe] Group B	Evolving	Labile	1	[FeFe]-centre, 2 x [4Fe4S] clusters	None	3.37706	5.89588	1.18357	5.5823	4.12275	2.47959	4.04446	2.8497	6.65551	4.97566	1.04364	8.76745	3.67793	10.2551
WP_026892188.1	MENITIKINGLDVSAPAGSTILEAARLAHIEIPTLCFLKEINEIAACRICTVEIGGGKLAASCVYPINAGMEVWTNTPKIRDYRKKTLQLILSNHDRSCLSCVRSGDCELQTLCKELGVDSENYFDGDKTPSTPDESAAHMVRDNSKCILCRRCSSICEKVQGIGVIGPNSRGFATFIGSPFEMGLGDTSCVSCGQCISVCPTGALYEKSSIQEVAAAIADPEKHVIVQTAPAVRAALGEEFNFPIGTNVEGKMVSVLRRLGFDKVFDTNFSADLTIMEEAHEFIERVQHGGVLPMITSCSPGWIKYCEHYFPDMTENLSSCKSPQQMFGAIAKSYYADKMGLKPEDIVSISVMPCTAKKFEIGRDDQDANGSPDVDYTITTRELARMIKQAGLRFETL…	[FeFe] Group A3	[FeFe] Group A3	Bifurcating	Labile	4	[FeFe]-centre, 3 x [4Fe4S] clusters, 1 x [2Fe2S] cluster	NADH dehydrogenase, thioredoxin, thioredoxin	2.77813	5.83478	4.7343	6.69876	2.06137	1.65306	0.808891	0.712424	8.13451	7.96106	1.04364	4.38373	13.4857	0
WP_002570587.1	MRGVETRIQEIRHRIFREVARMAYHTEWPVDKRIEELPYKIIPGEVGNFRNDVFLERAIVGERLRLAMGLPYRSAAEHAPVSDNIEAADRPETYYTPPLINVIKFACNACHEKRVFVTDGCQGCLAHPCEEVCPKDAIKLDRTNGRSHINDDKCIKCGRCADVCSYKAIIIQERPCAAACGMDAISTDENGKADIDYDKCVSCGMCLVNCPFGAIADKSQIFQVIRAIQSGERVYAAVAPAFVGQFGPKVTPGKLRAAMKALGFADVFEVAVGADLCATQEAIDFIQEVPEKLPFMATSCCPAWSMMAKKLFPEHADCISMALTPMTLTARLIKRHHSNAKVVFIGPCAAKKLEAMRTDIRSDVDFVLTFEEMDGIFDARHVDVEKIEEDPEGVNDASM…	[FeFe] Group B	[FeFe] Group B	Evolving	Labile	1	[FeFe]-centre, 2 x [4Fe4S] clusters	None	4.19687	6.94305	3.55072	8.93168	5.15343	1.65306	1.61778	4.27454	3.6975	12.9367	10.4364	4.38373	3.67793	6.52598
WP_007861015.1	MRGVETRIQEIRHRIFTEVARMAYHTEWPVDKRIEELPYKIIPGEVGKFRNDVFLERAIVGERLRLAMGLPYRSAAESAPISDNIGAADQSETYYTPPLINVIKFACNACHEKRVVVTDGCQGCLAHPCVEVCPKDAVSIDRSNGRSHIDQDKCIRCGRCAEVCSYHAVIVQERPCAAACGMDCIHSDENGKADIDYDKCVSCGMCLVNCPFGAIADKSQIFQVIRAIQSGERVYAAVAPAFVGQFGPKVTPGKLRAAMKALGFADVFEVAVGADLCATQEAIDFMQEVPEKLPFMATSCCPAWSMMAKKLFPEQADCISMALTPMTLTARLIKRHHKNAKVVFIGPCAAKKLEAMRTDIRSDVDFVLTFEEMTGIFDAKHLEVEKMEEDPDGVNDASM…	[FeFe] Group B	[FeFe] Group B	Evolving	Labile	1	[FeFe]-centre, 2 x [4Fe4S] clusters	None	5.93084	3.1226	1.18357	8.93168	7.21481	10.7449	3.23556	4.27454	2.958	8.95619	1.04364	1.46124	2.45195	1.86457
WP_022741745.1	MVTITLNGQAVEVAEGSTLLEAATAAGVNIPTLCYLKDLNCIGSCRVCLVDVEGQGLVAACNTAAAEGMVVRTDTPQVAAARRANLQAIMDDHRALCATCVRQDTCALRFLSSTFNLQDAGEALPVPEPWDATFPLQRDSSKCIKCMRCVAICDKVQHCGVWDFTGAGPSMKVIVRDNLPIADAGCALCGQCITHCPTGALTARDDVSRIMDAILDPAVETVVQVAPAVRAAWGEGVGLSRDEATPGRLAAALHAVGFDRVFDTDFAADLTIMEEGSEFVEFLGSDAPRPMFTSCCPGWVRFVKQHYPQFTAQLSSAKSPHQMMGAVVKNTLAAEADEAGRRLFVVSIMPCVAKKYECDVPELSTVVGATHGNGTSDANLAPDAPAAPELAAEATPDVD…	[FeFe] Group A2	[FeFe] Group A2	Evolving	Labile	2	[FeFe]-centre, 3 x [4Fe4S] clusters, 1 x [2Fe2S] cluster	NADH-dependent glutamate synthase	2.27144	0.471131	7.10145	4.46584	2.06137	0	0	0	0.739501	0	2.08728	0	0	0
WP_003534157.1	MVAAIADPKKHVVVQTAPSVRAALGEEFGMPIGTNVEGKMVAALRRLGFDKVFDTDFGADMTIMEEAHEFIDRVQNGGVLPLITSCSPGWIKFCEFYYPELLPNLSSCKSPQQMQGALIKTWYAETHNIDPKDIVSVSVMPCTAKKFEISRDDENAAGVPDVDVVLTVRELARMIKRANIDLTMLPDEKFDPTMDVSTGAAVIFGATGGVMEAALRTAADTLTGKSLDSIDYEEVRGTDGIKEAVYNVAGMDVKVAVASGLSNANEILKKVKNGEADYHFIEIMCCPGGCVNGGGMPIQPSSVRNFVDIRKERAKVLYEEDKNLPLRKSHDNPVVKKCYAEYLGEPGSHKAHEILHTTYTPRPKMK	[FeFe] Group A3	[FeFe] Group A3	Bifurcating	Labile	4	[FeFe]-centre, 2 x [4Fe4S] clusters	NADH dehydrogenase, thioredoxin, thioredoxin	19.3814	13.894	29.5894	23.4457	19.5831	12.3979	11.3245	19.9479	11.0925	16.9172	13.5673	7.30621	23.2935	11.1874
WP_007715934.1	MIMGIIDFKATKCKHCYKCVRYCEVKAIQVKDERAVIMPDKCVLCGHCLRICPQSAKTLNSDLNKVKGYIAAGERVVVSIAPSFMGLLKYKTIGQVRAALMRLGFEDVRETSEGAAFVTAEYAKLLAEHQMENIITTCCPSVNDLIEIYYPQLVPYLAPVVSPMIAHGLLLKEELGSQVKVVFLGPCIAKKKEAQDPRHESCIDAVLNFNDINQWLEEEEIEISDCEDKPFTCFDPKVNRLYPVTNGVVNSVLATEEQADNYRKFYVHGMQNCIDLCKSMARGEIKGCFIEMNMCSGGCIKGPTVNDETISRFKVKLDMEETIAREPVEARAMEPVWEKVSFAKRFEDHSPRDPQPSEEEIRAILRMTNKMRPEDELNCGACGYPTCREKAIAVYQHKA…	[FeFe] Group C	[FeFe] Group C3	Sensory	Labile	3	[FeFe]-centre, 2 x [4Fe4S] clusters, PAS domain	Phosphatase, thioredoxin	5.01771	2.56334	5.91787	7.81522	5.15343	4.13265	5.66224	1.42485	4.437	0	4.17457	0	4.9039	1.86457
WP_027199847.1	MNENITLKIDNREISVPKGTTILEAARELGIDIPTLCYMNLKDLCIKNAPASCRICVVEVDGRKNLAPSCATRCENGMNVHTNTMRVLNARRTVLELMLSDHPSDCLVCAKSGSCELQAVAIKLGIREIPFQGTQTEYKVDLSPSIRRDATKCIYCRRCEMMCNDIQTVGALGAVNRGFDSVVMPAFDQALQDSECTFCGQCVAVCPVGALTELDHTNRLIKDLANPDKTVIVQTAPAVRAALGEEFGLPAGTSVTGKMVAALRKLGFAKVFDTDFAADLTIMEEGTELLGRLTAFLNGDKDVKLPIITSCCPGWVNFFEKQFPDLLDNPSSARSPQQMFGAIAKTYWAEKMGIKREDLIVVSVMPCLAKKFESERDEFRTNGDPDVNYSISTRELAAL…	[FeFe] Group A3	[FeFe] Group A3	Bifurcating	Labile	3	[FeFe]-centre, 3 x [4Fe4S] clusters, 1 x [2Fe2S] cluster	NADH dehydrogenase, thioredoxin	5.08268	9.33353	2.36715	4.46584	0	12.3979	4.85335	6.41182	7.39501	3.98053	7.30549	21.9186	9.8078	5.5937
WP_022746312.1	MSKSKKHRVQEDNIIQMNKKKCIGCTACAFTCAKETKISVLKAVDNGRRTVDPKQVTFGASGCIYCGQCTLACPTTAINVRNDVSLVKEALNSGKYLILTAAPAVKATLGEEFSLPIGTNVGGKIAPSAKKMGFQNVFDTDFGADMTVIEEGTELIKRIVSKENLPMFTSCCPAWVRYVELFHPEILKNVSTSKSPQQMMGASIKTYFADTYNVLPTNIVTVSVKPCTAKKYEAQRDEMGRNGYKDIDIVLTIREYAQLLKEKGINITAIPDESSDPFMGEYTGAAVIFGASGGVMQATLRTVANYLKGDVAEVNNIKFNKIDGYEDIKESIISLGGQNYKVAIVNGLKEIEKFLSGRKWKEYLFVEVMACPGGCINGGGTPRIEMKSKINEKLCIACG…	[FeFe] Group A1	[FeFe] Group A1	Evolving	Labile	1	[FeFe]-centre, 2 x [4Fe4S] clusters	None	1.84475	4.53761	1.18357	0	1.03069	2.47959	5.66224	0.712424	1.479	1.99026	3.13092	17.5349	1.22598	1.86457
WP_005348317.1	MVNIKINDVPISVEEGTTILEACREAKMIVPTLCYLKDINEIGACRVCVVEIKGIERLVTSCNNTVKEGMEIYTNSPKVRDARRINIKLILSQHNCFCPTCVRSGNCQLQKVANDLEFGSGTFKQHITEEKWPMDFPLIRDESKCIKCMRCIQICDKVQSLKVWDIAKTGSRTTVNVSLGRNIKEADCALCGQCITHCPVAALSGRDDKRPVFSQNGMLNTRRKTTVVQVAPAVRTAWAEAFKLSRKFASPERLAGALRLMGFDYVFDTTYAADLTIMEEGSEFLERLKHKEDYQWPMFTSCCPGWVRFLKSQYPDMVDCLSTAKSPQQMQGAIIKNYFADKIHEDPENIFSVSIMPCIAKKAECALPTMDSTGTGPDVDVVLNTREFVDYMKSLNIDV…	[FeFe] Group A2	[FeFe] Group A2	Evolving	Labile	2	[FeFe]-centre, 3 x [4Fe4S] clusters, 1 x [2Fe2S] cluster	NADH-dependent glutamate synthase	1.66525	0.572861	0	5.5823	2.06137	0.826529	0.808891	0.712424	0	0	1.04364	1.46124	0	0.932283
WP_015518171.1	MDKKLRKFDTKVQYLKYKVLREVARHAWTTEGTEKPADSFSFFNDVAKKIVKDKPTMRCCIYKERAIVSERIKIAMGGDPTNPNVIEVIDIACDECPVGGYDVTEACRGCIAHRCEDVCRMGAITFDEHQKAHIDKSKCVNCGQCAKVCPYGAILEFKRPCERACKIGAISRATDTSSAAAHIDNDKCISCGACVYTCPFGAISDKSYIVDIIETLKGSDNSKNYKVYAVVAPSIASQFSYAKLDQVVTAIKQLGFHSVVEAALGADMVAYKESKELAEKGFLTSSCCPAFVMYIEKAFPTMTDKISHNLSPMAEIAKYIKDSDPTAKVVFIGPCTAKKMEVQWDKVKPYVDYAMTFEELQAIFDSKDIEVSELEGTVLDNASYYGRIFARCGGLADAV…	[FeFe] Group B	[FeFe] Group B	Evolving	Labile	1	[FeFe]-centre, 3 x [4Fe4S] clusters, 1 x [2Fe2S] cluster	None	7.53208	4.34615	13.0193	3.34938	3.09206	7.43876	4.04446	14.2485	6.65551	6.96593	4.17457	1.46124	1.22598	5.5937
WP_004840268.1	MSNMRGLDTQVRAIRRRVFKEVAKLGFEANSETLLEDMEAIPYEIVNDDTVKYRESTYRSRAIVRERLRLAMGLSLRPEDKPVHLTAGVQESNISEKYYEPPLMQVIPSACESCEENKYEVSNMCKGCLAHPCSEVCPKGAISMVNGKSYIDQEKCIKCGKCKAVCPYDAIAKKERPCKNACGVGAIVSDKYGRAYIDTEKCVSCGMCMVSCPFGAISDKSQIFQLTRALQEEGSEIIAEIAPAFVGQFGENINPRNIKAALIELGFKGVHEVALGADIGAVAEAHHYVEKVVTGELPFLLTSCCPSWAMLAKKFFPDLIDQISQELTPMVATARSIKKEHPNAKVVFIGPCAAKKLEASRRSVRSDVDFVVTFEELQAMFDAKEIDLSQYEAESSFHD…	[FeFe] Group B	[FeFe] Group B	Evolving	Labile	1	[FeFe]-centre, 2 x [4Fe4S] clusters	None	31.4253	22.3748	20.1208	15.6304	17.5217	33.0612	56.6224	45.5951	36.2355	15.9221	18.7855	17.5349	15.9377	29.8331
WP_016147607.1	MRTFETDVQLLKYRVLKAVAKRAYEGTLMESYYEIPKLISPGPKPTMRCCVYKERAIVQERVRLAMGGDRRNPNIIEVIEIACDECPVERYMVSESCRGCISQRCIKTCPKQAISKKNGKAHIDFDLCIECGRCAKVCPYGAITEHVRPCERSCKVGAIHMNEEKKAEINPEKCISCGACSYACPFGAIMDKSFMVDAINIIRNKKENYKTVAIVAPAIAAQFDGVTLGQVATAIRQLGFDYVVEAAIGADMVADKEAEELVEKGFLTSSCCPAFVDYIKKHVPELADKISHNLSPMAEIGKFVKLGGESPVKCIFIGPCTAKKAEMRLPNVDLWIDSVLTFEELQAMIDAREIEMESLEETSMNDASYFGRIFGRSGGLTEAVLEVIKEKGLDFEVKA…	[FeFe] Group B	[FeFe] Group B	Evolving	Labile	1	[FeFe]-centre, 3 x [4Fe4S] clusters, 1 x [2Fe2S] cluster	None	2.48305	6.00841	0	1.11646	11.3376	0.826529	1.61778	0	0	2.9854	5.21821	8.76745	13.4857	5.5937
WP_009202817.1	MRGIQTPVRNVRRRIFKEIAKFGYEQRNLQDLEDLPYEIIPGEVAKYRDSIYRERAIVGERLRLAMGMSLNPADKPTRITKEIDESNISEKYYEPPLLQVIPSACNECKEKAFIVGEQCQGCMAHPCMEVCPKKAISFKDGYSYIDQEKCIKCGQCKKVCPYGAIYERKRPCANACGVGAIETDYAGRAKINPDKCVSCGMCMVNCPFGAIADKSQIYQLIKAMNEGAEVIAILAPAFVGQFGPKATPNKIKAALFDIGFADVWEVAVGADAGALEEAKHYVQSVATGKLPFLLTSCCPSWSMLGKKYFPEVIDEISNALTPMVATARAARITSPNAKIVFVGPCVAKKLEASRRTVRSEVDFVITFEELAGMFDAKEIDFNTYEKEEELNDAFGAGRG…	[FeFe] Group B	[FeFe] Group B	Evolving	Labile	1	[FeFe]-centre, 2 x [4Fe4S] clusters	None	12.4037	7.80333	13.0193	12.2811	10.3069	14.051	10.5156	14.2485	7.39501	11.9416	5.21821	1.46124	1.22598	19.5779
WP_006352890.1	MPIGTNVKGKMVAALRRLGFDKVFDTDFGADLTIMEEANEFIERVQNGGKLPMITSCSPGWINYCEHYFPDMLDNLSTCKSPQQMTGAMIKTWYAEQNGLDPKDIVVVSIMPCTAKKYEIHRADQDAAGYPDIDIVLTTRELARMINRAHINFTDLPDEEFDPALGITTGAGAIFGATGGVMEAALRTAADWITGKDLSVIDYYTDVRGTDGIKTATYDIKDLTIKVGVASGLANAKELLNRVREGEHFDFIEIMCCPGGCVNGGGQPLQPSSIYNFTDLKTKRAKALYDEDKELPIRKSHKSPIIEKLYKEYLEKPGSHKAHELLHTSYSAKVKPVK	[FeFe] Group A3	[FeFe] Group A3	Bifurcating	Labile	4	[FeFe]-centre, 2 x [4Fe4S] clusters	NADH dehydrogenase, thioredoxin, thioredoxin	0.604648	1.82097	1.18357	0	0	0.826529	1.61778	0	0	3.98053	0	2.92248	1.22598	2.79685
WP_015513462.1	MENITIKINGVEVSAPAGSTILEAARLAHIDIPTLCYLKEINEIGACRMCIVEVKGARSLVASCVYPINPGMEVWTNTPKVIESRKKTLELLLSNHKKECLSCVRSGNCELQQLCKELGVEDENYYSGEMTPAMIDTSAAHMVRDNSKCILCRRCSAVCEKVQGIGVIGPNERGFKSYIGTAFNMDLADTSCVSCGQCIAVCPTGALHEKDNTDEIFEAIADPDKYVVVQTAPSVRAGLGEEFGYPMGTDVEGKMVAALRRLGFDKVFDTDFAADLTIMEEAHEFLDRVQNGGKLPLITSCSPGWIKYCEHYFPDMTENLSSCKSPQQMFGATLKTYYAEKMGIDPKKIVSVSVMPCTAKKFEIGRDDEDAAGVPDVDIAITTRELARMIKKVGIMFTE…	[FeFe] Group A3	[FeFe] Group A3	Bifurcating	Labile	4	[FeFe]-centre, 3 x [4Fe4S] clusters, 1 x [2Fe2S] cluster	NADH dehydrogenase, thioredoxin, thioredoxin	7.75598	10.6861	8.28502	7.81522	10.3069	7.43876	4.85335	7.83666	10.353	4.97566	9.39277	13.1512	12.2598	13.9842
WP_026649549.1	MGHMIIDGRKVEFTDEKNVLSVIRKAGINIPTLCYHSEVSTFGACRLCTVEDERGKTFASCSEQPRDGMVIYTNSGRVKKYRKLIVELLLAAHCRDCTTCVKSGECVLQELAHRLGVQTIRFKNTREYHELDTSSPSLVRDPNKCILCGDCVRACEELQGIGALGFAFRGTEAMVMPAFNKKIAETECVNCGQCRVYCPTGAIAIKTHMDEAWEALADPNIRVVAQIAPAVRVAVGDHYGLTKGKSVMGKIVNALHRMGFDEVYDTSFSADLTIMEESAEFLDRIKKGEKLPLLTSCCPAWVKFITDQYKEYIPNLSTCRSPQGMLSAVIKEYFRDPEHAGGKKTVMISIMPCTAKKAEAVRPNSFTDGEQDTDIVITTTELLRMIDNFGLDFATLDPE…	[FeFe] Group A1	[FeFe] Group A1	Evolving	Labile	1	[FeFe]-centre, 3 x [4Fe4S] clusters, 1 x [2Fe2S] cluster	None	0.924599	2.40535	0	0	4.12275	0	0	1.42485	3.6975	0	1.04364	2.92248	4.9039	1.86457
WP_022739737.1	MAATEISVDHIARVEGHGDIRLVIEDGRVVTCEMAVVEPARLFESMVRGRSFEEVPYIASRVCGICSSSHVVTDLRAIEQVFGVEVADRTEALRELLLYGSYLQNHGTHLFVFAAPDFLGHKSVFPLAEGNPELFERALGLKALGNELCTLVGGRSIHPITAVVGGFTHEISADEYLRLAEAMDATREFALASVDLFRDFDTVDVQTEGDLLAMVAPGAYPVCTSDTLRFVRAGYDFSAQDVEEEIEEYPVGHSAAFLARARRTGRPYMTAALARVNASWDALSKDARYAAAKAGLRPPEYNPFANNIAQAVELVDALDRCAALCRRLAADEFEGSSEPVPFTVRAGRGVGFTEAPRGALFHILDINGEGRIERASIMTPTAQNIANLEADMRQLAEKM…	[NiFe] Group 3b	[NiFe] Group 3b	Bidirectional	Tolerant	4	[NiFe]-centre, 3 x [4Fe4S] clusters	Diaphorase, [FeS] protein	2.36248	0.923701	5.91787	2.23292	0	1.65306	0.808891	3.56212	1.479	0	3.13092	0	0	0.932283
WP_006778911.1	MGIIDFKATKCKHCYKCVRNCEVKAIMIKDGRAEIMPDKCVLCGKCLQICPQSAKTLVSDLDMVKGYIKSGKTVVVSLAPSYMGLLKYKTIGQVQSALLKLGFADVRETSEGAVLVTEEYARLLREAKMENIITTCCPSVNDLIEIYYPQLVPYLAPVVSPMVAHGKLLKKEYGRDAKVVFIGPCIAKKKESQDRRHDDCIDAVLNFNDLRQWLREEEIEIEDCEDMPFEKADPKVNRLYPVTNGVVNSVLATEGRADDYRKFYVHGIRNCIDLCDSMSRGEISGCFIEMNMCSGGCIKGPTVEDETISRFKVKLDMEETIAKEPVQAKTVAAMEEGLALHKDYMDRSPDDVMPTEEEIQAILKKIGKVRPEDELNCGACGYATCREKAVAVFQKKAEI…	[FeFe] Group C	[FeFe] Group C3	Sensory	Labile	3	[FeFe]-centre, 2 x [4Fe4S] clusters, PAS domain	Phosphatase, thioredoxin	10.5602	15.3213	11.8357	12.2811	18.5524	4.95918	6.47113	9.26151	20.706	6.96593	17.7419	4.38373	31.8754	10.2551
WP_007157603.1	MVTNDKGFIPLKHRVIEGLARIAWNGEVTEEAKEGLIRELSPGPKAAFRCCVYKEREILRWRIRLACNEDASPKRKSSNVIQVIDPACEECPISSYSVTDNCRLCLGKACQNSCHFGAITMTDQRAHIDPMKCKECGMCATACPYSAIAQLTRPCKKPCPVNAITYDENGLCVIDDNRCIRCGQCVHSCPFGAISTKTHLLQVISAIKEGKEVYAMCAPATEGQFGKDISMSAIRVALKKLGFTDMVEVGLGGDMTAAYEALEWSEARKEGKKMTTSCCPAFINLLKIHFPDQYHENMSETLSPMAAVSRYLKAIHPDCVTVFIGPCMAKKSESQEMGIEGNADYVLSFGEFSSLLRSKDVQLEAEVSPYQEASLWGKNFASSGGVANAVMECMRERGE…	[FeFe] Group B	[FeFe] Group B	Evolving	Labile	1	[FeFe]-centre, 3 x [4Fe4S] clusters, 1 x [2Fe2S] cluster	None	1.94219	0.880526	0	2.23292	1.03069	3.30612	0.808891	4.27454	0.739501	0.995132	2.08728	1.46124	0	0
WP_005338995.1	MVNLTIDGRQISVEENTTIMEAARSVGIQIPSLCYLKGINEIGACRVCVVELEGKDRLITACNNICKEGMVIYTNSPKVRKDRRTTVELILSEHDCQCVTCMRSGNCSLQKIANDLDIIELPFHQYLEHQPWDKTFPLIRDSAKCIKCMRCVQVCDKVQGLGVWDVEGTGYHTTVNVSGHNSIREADCALCGQCITHCPVGALRERSDTNEVWKAIEDPDKIVVAQVAPAVRAAWGEELGLAPEDATVGKIIDALKRMGINYVFDTTFSADLTIMEEGNEFVKRFTSGELKDRPMFTSCCPGWVRFIKSQFPHLVKYLSSAKSPQQMFGAVMKTYFAEKLGVSPEKIYTVSVMPCVAKKAEREMDLYYEEYAGHDIDAVITTRELIRMIRSAHISPQTL…	[FeFe] Group A2	[FeFe] Group A2	Evolving	Labile	2	[FeFe]-centre, 3 x [4Fe4S] clusters, 1 x [2Fe2S] cluster	NADH-dependent glutamate synthase	6.52771	4.22323	4.7343	3.34938	4.12275	10.7449	10.5156	5.69939	6.65551	2.9854	1.04364	8.76745	1.22598	4.66141
WP_012414922.1	MREILKLKKSNCKNCYKCIRHCPVKSIRVSGNQAHIINDECILCGQCFVVCPQGAKQIESDIEKVKVMLYGKEPVIASLAPSFIANYGGAGIKSLSKALKKLGFHSAEETAIGATMVKNEYENILAKKEHDILISSSCHSVNLLIQKHFPSALKYLANVMSPMQAHCRDIKKRYPGAKTVFIGPCVSKKDEAQRYPDIVDAVLTFEELTQWFKEEKITVEPEKNKTAEGKARFFPTSGGILKTMRGTAKKGEYKYIAVDGTEACIDALNDIKDGNIFRCFIEMSACKGSCIGGPIMEKYNRSPIKGYMQVAAYAGEKDFKVEDYSGKITQKRNPLHFNKKEIPPHEIEEILKQMGKTKPEHELNCASCGYNTCREKAAAVYLGNANISMCLPFLKDKAE…	[FeFe] Group C	[FeFe] Group C3	Sensory	Labile	2	[FeFe]-centre, 2 x [4Fe4S] clusters, PAS domain	Phosphatase	2.82467	1.5712	2.36715	4.46584	1.03069	2.47959	1.61778	4.98697	0.739501	0	2.08728	2.92248	3.67793	0
WP_013780872.1	MDNNYFHSVTLNKEKCRGCTNCIKRCPTEAIRVRAGKANITAERCIDCGECIRVCPYHAKLAVTDPVDVISKYKYTIALTAPTLYGQFKRIEDALAVDDALKALGFDDVFEVAKAADIAAHFIKQRIESADIPRPIISSSCPVIVRLIQVRFPSLIEHMVDVWSPMEIAGYIAKQRAIETTGYDPDDIGAFFITPCPAKMTAIRHPIERRTSSVDGAIAISDIFGHIVAEVGGISSSRGAIEASSFGLGWANSGGESLSIGADNSLAVDGIQNVIKVLEEIEDDKMNDLDFFEGLSCPGGCVGGPLTVENGFVARNRIRKWAKSLSGQLYMTSLPRAPYFEQPILPNPAMKLDDDINAAMEKMQRIEIITDELPGLDCGSCGSPSCRALAEDIVQGKAS…	[FeFe] Group C	[FeFe] Group C1	Sensory	Labile	2	[FeFe]-centre, 2 x [4Fe4S] clusters, PAS domain	Histidine kinase	0.625706	1.84679	0	2.23292	0	0	0.808891	0.712424	0.739501	2.9854	0	0	7.35585	0
WP_012939287.1	MVTCTIDGKIIQVPEGTTIMEAARQAHIRIPHLCYLKGLNEIAACRVCCVEVEGEPAMVTACNSPVKEGMVVRTNSPRVRETRKINVELILSQHDCRCATCVRSGNCRLQSLANSLGIHDNPYEEQLPKGLRRAWTTTYPLFHDYNKCIKCMRCIQVCDKIQAMHIWDVAGTGGRTTVDVSGNRVIKDSDCTLCGQCIIHCPVAGLRERDDTDRLYEALADPDKVTLVQVAPAVRTAWCEAFGLPREEGTIGRMAAALRQLGFDHVYDTTFAADLTIMEEANEFLERFLAGDTREFPMFTSCCPGWVRFLKGQYPELTDRLSTSKSPQQMFGAIAKTWLADKLQVIPEKLYCVSIMPCLAKKAECALPTMRTDHGPDVDLALTTREFIRVLRADHLDPS…	[FeFe] Group A2	[FeFe] Group A2	Evolving	Labile	2	[FeFe]-centre, 3 x [4Fe4S] clusters, 1 x [2Fe2S] cluster	NADH-dependent glutamate synthase	5.86481	8.10349	5.91787	10.0481	5.15343	4.13265	5.66224	4.27454	4.437	12.9367	14.611	5.84497	6.12988	4.66141
WP_013610546.1	MGNETFYHALKINSEVCTGCTHCMNVCPTAAIRIKYGKATINEAACTDCGMCLKTCPRQAIYVEQDDFNQIFKFSYRIILLPSVFIGQFPEDISEEQIFSELHNLGFHYVMEVDKSTGLLMEETKHYLQQHPRQRPFISSFCPAVVRLIQVRFPSLIGHIVRLKQAMDIAAIYVRKKYIDKGIPEKEIGVFYVTQCAAKIAAIKCPVGEESSPVDGVINMDFIYNKILLSINRHKSQVLPRVPEQYHLTPQSIQWTLSGGEASNYPGRCLAIDEIHNVIDILEKLENDELTDIDFLELRACDHSCAGGALAINNRFLTIERLQKRMENYIKYNYISINKMPRYKDFLVKQMQLSGEIPPRSIEKLDEDLSVAFQKMEKITRIMKVLPQIDCGACGTPSC…	[FeFe] Group C	[FeFe] Group C1	Sensory	Labile	2	[FeFe]-centre, 2 x [4Fe4S] clusters, PAS domain	Histidine kinase	1.52087	2.89829	1.18357	2.23292	1.03069	0.826529	2.42667	1.42485	2.2185	0	2.08728	8.76745	2.45195	1.86457
WP_015720177.1	MSIAQITIDGKTITMPAGSTILEAAKKLHVDIPTLCYLNLEHLKVNNQLATCRVCVVEVEGRRNLAPACATPIVDKMVVKTNTIRVMNARKTVMELFLSDHPKDCLVCQKSGECELQDLSTKFGLRGSPYDGGAMSTYRKDFSESIIRDMDKCVMCRRCETMCNDVQTCNVLSGVNRGFNAVVAPAFEMNLADSGCTNCGQCVAVCPVGALAEKDHTWSVIEALADPDKVVVVQTAPAVRAALGEDLGMEAGTLVTGKMVSALRSLGFDYVFDTDFAADLTIMEEGSEFLDRLTRFLAGDQSVKLPIMTSCCPAWVKFFEHQFPDLLDVPSTAKSPQQMFGAIAKTYFAEKLGIPREKMVVVSIMPCLAKKYEAARPEFSVDGNRDVDVVLSTRELARL…	[FeFe] Group A3	[FeFe] Group A3	Bifurcating	Labile	4	[FeFe]-centre, 3 x [4Fe4S] clusters, 1 x [2Fe2S] cluster	NADH dehydrogenase, thioredoxin, thioredoxin	0.591787	1.51517	3.55072	0	0	0	0	0	0	0	2.08728	1.46124	3.67793	1.86457
WP_006574746.1	MDDYIRLKKSNCKNCYKCIRNCPVKSIRFSDHQANIVPDECILCGRCFVACPQNAKEVRDDLPAARALLASGAPVYASVAPSFVAAWEGVTISSMEAALKQLGFAGAEETALGATMVKTEYEHLTAAGEQEVIVSTCCHTVNLLVQKHFPEVLPALAKVVSPMQAHCRDLKRRHPGCRTVFIGPCISKKDEAESYPGIVDCVLTFEELSAWLEQAGVTLEAGTDGNRESRARLFPTTGGILRTMAERNPDYAYLAVDGIDNCITALRDIAEGRMGKCFIEMSACPGSCIGGPAMGKNRRAAVRDFVTVDRYAGPADFLFEPLPPEKMNKRFPLLLTGQVKPGSAAIEEVLRQMGKTRPSDELNCGTCGYDTCREKAAAVLAGKADITMCLPYLKERAES…	[FeFe] Group C	[FeFe] Group C3	Sensory	Labile	3	[FeFe]-centre, 2 x [4Fe4S] clusters, PAS domain	Phosphatase, thioredoxin	2.9366	1.51418	3.55072	1.11646	9.27618	0.826529	0	2.8497	0.739501	2.9854	1.04364	0	2.45195	1.86457
WP_010251919.1	MKEYFHSVTLDEEKCKGCTNCIKRCPTEAIRVRKGKARIIAERCIDCGECIRVCPYHAKKAITDQFDIINNFKFKVAIPAPTIYGQFKSARSTNHLLTALKLIGFDHVYEVAKAAEIVSRATREVMKKNNLPKPLISSACPAVVKLIQVRFPSLIDNILKLESPMELAAKIVKDELVKNNNIPLEDIGVFFITPCAAKATSIKAPYEREKSCVDGAISIKDIYLKLFTVLGDVKNEEDLGRAGFTGIRWANSGGESLALGTDKFLAVDGIHNVISILEEIENDKLEDIEFIEALACQGGCLGGPLTVENLFVAKTRIKRFIDMAKKNKNDIDEKPDEAYDYDLLWTGNVEHKPIMKLDEDFEIAMKKLETLQTISEELPGLDCGACGAPNCRALAEDIV…	[FeFe] Group C	[FeFe] Group C1	Sensory	Labile	2	[FeFe]-centre, 2 x [4Fe4S] clusters, PAS domain	Histidine kinase	2.39534	1.23141	4.7343	2.23292	5.15343	0.826529	0	1.42485	0.739501	0.995132	1.04364	0	3.67793	0.932283
WP_029502830.1	MANINIKINGMEVSAPAGSTILEAARLAHIEIPTLCYLKEINEIGACRICVVEVKGARSLVASCVYPINEGMEVFTNTPKVLKSRKRTLQLILSNHDRRCLSCVRSGDCELQKLCKDLGVEDESLYDGEKGIYELDESAAHMVRDNNKCILCRRCSAVCSQTQGIGVIGANERGFKTNIGSAFEMGLGETSCVSCGQCIAVCPTGALYEKDSVDEVLEAIADPEKFVFVQTAPAVRAGLGEAFGLPIGTNVEGQMIAALRRVGFDKVFDTNFSADLTIMEEATEFLDRVQNGGVLPLITSCSPGWIKYCEHYFPEMTENLSSCKSPQQMFGAIAKTYYAKKLGIDPEKMVSVSIMPCTAKKFELGRDDQSAAGVPDVDYSLTVRELARLIDKVGLNFLS…	[FeFe] Group A3	[FeFe] Group A3	Bifurcating	Labile	4	[FeFe]-centre, 3 x [4Fe4S] clusters, 1 x [2Fe2S] cluster	NADH dehydrogenase, thioredoxin, thioredoxin	4.43228	6.26031	8.28502	6.69876	6.18412	2.47959	0.808891	2.13727	3.6975	3.98053	9.39277	8.76745	6.12988	5.5937
WP_004614045.1	MKVIDFQDANCRHCYKCVRNCSVKAISVRNEQAHIIREACIHCGHCLEVCPQNAKTFSSDMERVKGYLRQGMKTVISIAPSYLGVLEYKNPGQVVDALLKLGFFEVRETAEGAALVTREYQKLLEEGTMKNLITTCCPSVNDLIEKYYPSLTKYMTPVVSPMIAHGRLIKKIYGEDVKVVFLGPCIAKKEEAVGDDRVFGAVDAILTFEELGGWLKAEGITISECEEKPFGNPDPRINRIYPVGGGIVKSVMEQKEMKDTYHKLYVDGLDACMELFKSMEKEELSHCFIEANVCDGGCIKGPASDQWQNSFVKAKVQIEAQVEHAPASEDIPYDCISMQKTFLDRSQHEQVPTEEELTELLQAIGKYKKEDELNCGACGYSTCRAKATAVFQKKAELGM…	[FeFe] Group C	[FeFe] Group C3	Sensory	Labile	3	[FeFe]-centre, 2 x [4Fe4S] clusters, PAS domain	Phosphatase, thioredoxin	3.25084	5.25926	1.18357	2.23292	7.21481	1.65306	0.808891	6.41182	2.958	2.9854	3.13092	11.6899	6.12988	4.66141
WP_015518595.1	MVNIKINGIEYAVEEGTTILEACRQNGIRIPTLCWLKDINAIGACRICVVEMTGARSLVASCVYPLSKFDEGKNILTHSPAVLQSRKMTLHLLLSDHNMDCLACSRNGSCELQELCKELGVDDTTFFEGEKNEYDIDYSSKHMFRDNNKCIHCRRCIAACDKLQGIGVIGANNRGFKTSIDCAFDLDLAETACVSCGQCITACPTGALAEKDDTDKVWDALADPEKVVVVQTAPAVRASLGEAFGYPMGTPVEGKMVAALRRLGFNAVFDTNFGADLTIMEESHEFLDRVTNGGVLPMITSCSPGWIRFCEAYFPEFIPNLSSCKSPQQMNGAITKTYWAKKMGIDPKNIVSVSVMPCTAKKFEIGREDQSAAGVPDVDISITTRELVKMINRAGLRFR…	[FeFe] Group A3	[FeFe] Group A3	Bifurcating	Labile	4	[FeFe]-centre, 3 x [4Fe4S] clusters, 1 x [2Fe2S] cluster	NADH dehydrogenase, thioredoxin, thioredoxin	6.703	11.9479	11.8357	1.11646	0	2.47959	22.649	2.13727	25.8825	1.99026	15.6546	0	8.58183	19.5779
WP_007046798.1	MRGIYTPVTNIRRKVFTEVARMAYEVNEMSDYANLMRELPYKIIPGEEGSLRSSIFLERAIISERIRLAMGLSLRPLDESVPASEGLEHSVIADKYYEPPLINVIKFACNRCPEKIIKVTAMCQGCLAHPCQEVCPKHAISFRNGKSHIDQSLCVKCGRCVNSCPYSAIVKTERPCAAACGMGAIHSDQYGRADIDYDKCVSCGMCLVNCPFGAIVDKGQIFQLVQSIKRGDKVIAIVAPAFINQFPGMTPSKLKEGMRMLGFCDVEEVAIGADLCTIDEAKDFMEEVPSKHPFMGTSCCPAWSVMAKKLFPEYADCISMTMTPMVLTARLIKKDHPDARICFVGPCSAKKLEASRRSVRSEVDFVLTFEELMGLFEAKEVDFASLPNSPEDAFESASA…	[FeFe] Group B	[FeFe] Group B	Evolving	Labile	1	[FeFe]-centre, 2 x [4Fe4S] clusters	None	7.76787	5.53339	9.4686	12.2811	8.2455	3.30612	4.04446	9.26151	7.39501	9.95132	3.13092	4.38373	3.67793	4.66141
WP_009132358.1	MEEKQITLQIDRHYITVPEGSTILEAARKIGIDIPTLCHIDLKGTCVKNNPASCRICVVEVEGRRNLAPACATRCTEGMVVRTSTLRVMNARKVVAELILSDHPNDCLTCPKCGDCELQTLALRFNIRRMPYNGGELSPRKREVTSSIVRNMDKCIFCRRCESVCNEVQTVGALGAIRRGFNTTIAPAFDKMMSDSECTYCGQCVAVCPVGALTERDHTNRLLLDLENPDKVVIVQTAPAVRAALGEEFGLPAGTLVTGKMVYALRELGFDYVFDTDFAADLTIMEEGAEILNRLTRYMNGDKSVRLPILTSCCPAWVNFFEHHFPDMLDIPSTARSPQQMFGSIAKTFWAEKMGIPREKLVVVSIMPCLAKKYECDRNEFKTDGSPDVDYSISTRELA…	[FeFe] Group A3	[FeFe] Group A3	Bifurcating	Labile	2	[FeFe]-centre, 3 x [4Fe4S] clusters, 1 x [2Fe2S] cluster	NADH dehydrogenase	2.04254	4.16686	0	0	3.09206	1.65306	3.23556	4.27454	0	4.97566	2.08728	16.0737	0	1.86457
WP_004608286.1	METMENINLKINGLDVSAPAGSTILEAAHLAGIKIPTLCFLKEINEIGACRMCVVEVKGARNLVAACVHPINEGMEVYTNTPQLIKARKKTLQLLLSNHDKKCLSCVRSGNCELQQLCREYGVDDENFFEGKVNHYELDTSAAHMVRDNNKCILCRRCVAVCEKVQGIGVIGTNNRGFSTMIGSAFEMGLGETSCVSCGQCIAVCPTGALYEKDYTQKILDAIADPDKYVVVQTAPSVRAGLGEEFGYPMGTDVEGKMAAALRRVGFDKIFDTDWAADLTIMEEATELLDRIKNGGVLPMITSCSPGWIKYCEHYFPDMTENLSTCKSPQQMFGAMLKTYFAEKEGIDPKKIVSVSVMPCTAKKFEIGRDDQDAAGVPDVDIAITTRELARLIRRCGID…	[FeFe] Group A3	[FeFe] Group A3	Bifurcating	Labile	4	[FeFe]-centre, 3 x [4Fe4S] clusters, 1 x [2Fe2S] cluster	NADH dehydrogenase, thioredoxin, thioredoxin	10.339	13.1607	14.2029	10.0481	13.3989	8.26529	9.70669	6.41182	9.61351	13.9319	8.34913	23.3799	17.1637	6.52598
WP_004608289.1	MKAISVQNEQAHIMKDHCINCGHCLEVCPQNAKTFASDMDRVKRYLKQGVKTIISIAPSYLGVLEYDKPGQIVDALKQLGFYEVRETAEGAALVTREYWKLLKDGQMDNIITTCCPSVNDLIEKYYPSLVPMMAPVVSPMIAHGRLIKDIYGPDVKVVFLGPCIAKKEEAIGDERVQGAIDAILTFEEIVKWWKAKGIDVHQCQNLPMGNPSPKVNQLYPISGGIIKSVRASSVEDNYYKIHIDGLKACMELFEELEKGGIQNCFFEVNVCEGGCIKGPASDKWQQSLVRAKMDLEDQVAYQEEAQGIEGRDIELQKTFKDRRVHDRTPSDTEMEQILHAMGKYTKEDELNCGACGYPTCRDKATAVYQKKAEIGMCLPYAVAQAESMSNIVMDVTPSM…	[FeFe] Group C	[FeFe] Group C3	Sensory	Labile	3	[FeFe]-centre, 2 x [4Fe4S] clusters, PAS domain	Phosphatase, thioredoxin	6.98705	9.1388	1.18357	6.69876	5.15343	9.91835	9.70669	9.26151	11.0925	4.97566	7.30549	11.6899	8.58183	11.1874
WP_006442921.1	MKHEFAEIRIPIESDNPAVRREESLCIKCGQCRQVCEREVAVGRLYDLKSTNDTAICVHCGQCANVCPVDSIKEVYEYRKVKEAVEDPEKIVIFSTSPSVRVGLGEEFGYPAGSFVEGKMVAALRSLGADYVLDTNFAADLTIMEEASELVERVTKKTKPLPQFTSCCPAWVKFAETFYPEILPHISSAKSPIGMQGPTIKTYFAKQNNLDAAKIVNVAVTPCTAKKFEIRRGERNISAVSNGAEDMRDMDHVITTRELARWMREEGIDLKDLPDSSYDSLMGAASGAGVIFGNTGGVMEAAARTAYYLITGENPPEDYLKLEPVRGMAGIRKAEVAIAGVPLKLAVIHGLENARQFIDCMTGGEQTYDFVEIMTCPGGCIGGGGQPKTEVPMTDAVRQ…	[FeFe] Group A1	[FeFe] Group A1	Evolving	Labile	1	[FeFe]-centre, 2 x [4Fe4S] clusters	None	1.56417	0.666941	2.36715	4.46584	1.03069	0	0.808891	0.712424	2.958	0	1.04364	0	0	0
WP_014296384.1	MNGNIIYTEPEKCTLCYNCIRVCPVHANKVYDDYVEPDSDLCIKCGQCILSCESQARRYRKDIDIFEDFKNKNEYLVAIIAPAYVGDLENTTPNQYAAALKKLGFNEVHEVAFGAELTTLEVLKEMEEKKPEYVIMSPCPSLINYLEKWQPDLLQYFSESYSPMLSTAAFVKKEKPNAKVVFISPCTAKKSEIEHESIKGLVDIVLTFEEINELFEKNNIKPSVLEEELFDGYQPNYATLFPVSGGLTKTAASYLKNKKIDDIMLEEDVLVIEGKERSIPFFKDFEKNIKAGKKDVTPKFIDILFCEGCIDGPATRKDIPLFEKRAKIIKYTKDRLVKNKFLTKDGKQVAQKTISLKDTKKIYEEMNLKRYFKAKPVNYKEPPESFIVKILEKTNRLND…	[FeFe] Group C	[FeFe] Group C3	Sensory	Labile	1	[FeFe]-centre, 2 x [4Fe4S] clusters, PAS domain	Fusion with methyl-accepting chemotaxis protein	1.06162	1.84797	4.7343	0	0	0.826529	0.808891	0	6.65551	0.995132	1.04364	1.46124	0	0.932283
WP_028085756.1	MMRGINTTVRRLRRKVFEEVAALGFKADADTLCDDMEAIPYALVNDETEQYRDSVYRARAVVREQVRLAMGLSLRPEDKPVHLTAGVEASNISDKYYEPPLMQVIPSACMRCEAKGYEVSNMCKGCLAHPCMEVCPKGAISMVNGKSHIDQEKCIKCGKCKSVCPYDAISKKERPCAKACGVNAIESDKMGRAYVNPDKCVSCGMCMVSCPFGAISDKSQIFQLARALSEGEQIIAEIAPAFTGQFGDNINARNLKAALEELGFSQVYEVALGADIGAVAEAHHYVEKVATGELPFLLTSCCPSWAMLAKKYFPDMIDEVSQELTPMVATARTIKKEHPNAKVVFIGPCAAKKLEAMRRTVRSDVDFVVTFEELQGMFDAKGIDLSEYEAESSFHNATG…	[FeFe] Group B	[FeFe] Group B	Evolving	Labile	1	[FeFe]-centre, 2 x [4Fe4S] clusters	None	16.6227	14.4446	14.2029	17.8634	11.3376	17.3571	16.1778	22.7976	10.353	15.9221	12.5237	21.9186	11.0338	14.9165
WP_013486154.1	MVNVTINGTPVQAGEDTTILEAAASAGIHIPTLCYLKGLNEIGACRVCLVEIEGIEKLVTACGNKVAEGMVISTNSPRVREARRTNVELILSQHDCYCASCARSGNCNLQSLSNDLGILDLPYRREMPVSEWNKSFPLIRDFSKCIKCMRCVQVCDKIQDMNIWDIANTGSRTTVDVSQNRKMEESDCTLCGQCITHCPVGALRERDDTDKAFAALADPDTITVVQIAPAVRAAWGESLGLPREQATAKRLVAALRKIGFRYIFDTTFSADLTIMEEGSEFLAKLRNRENETFPMFTSCCPGWVRFLKSQYPDMVRQLSTAKSPQQMFGAITKSYYAKLLDVEPERICSISVMPCLAKKQEAALPTMDTAGAGPDVDIVLTTREIDRMIRAEDIHPGEL…	[FeFe] Group A2	[FeFe] Group A2	Evolving	Labile	2	[FeFe]-centre, 3 x [4Fe4S] clusters, 1 x [2Fe2S] cluster	NADH-dependent glutamate synthase	3.93393	2.86719	3.55072	0	2.06137	7.43876	4.85335	5.69939	2.2185	2.9854	3.13092	1.46124	3.67793	3.72913
WP_015529112.1	MGLSLRPENKPVHLTAGVEASNISEKYYEPPLMQVIPSGCESCEENKYEVSNVCKGCLAHPCQEVCPRGAISMVNGKSFIDQDKCIKCGKCKSVCPYDAIAKKERPCKKACGVNAITSDKLGRAYIDADKCVSCGMCMVSCPFGAISDKSQIFQLARALSEGEEIVAEVAPAFVGQFGPNINVRNFKAALEELGFSETYEVALGADIGAIAEAHHYVNKVTTGELPFLLTSCCPSWAMLAKKFFPDLIDQISQELTPMVATARTIKQEHPNAKVVFIGPCAAKKLEASRRTVRSDVDFVVTFEELQAMFDAKGIDLTAYEAESSFHDATGAGRGYACAGGVAKAIEECINEYYPGTQVNIEHAEGLAECKKILTLAKAGRMNGCLIEGMGCPGGCIAGA…	[FeFe] Group B	[FeFe] Group B	Evolving	Labile	1	[FeFe]-centre, 2 x [4Fe4S] clusters	None	26.9297	30.6977	20.1208	22.3292	25.7672	29.7551	31.5468	32.0591	39.933	23.8832	24.0038	30.6861	36.7793	28.9008
WP_004605002.1	MSIKTFIEERGRIMKTFEELYKDVLSRKISLKEPLPSEYNPLHLDCLLHPKNYAPVIPSVECEECAYERACQRSCIFDAIEEGEDGKLRINPSLCTGCGVCMDACKEEKLTASKDVLPAMKAVREAKGPAYMMVAPAFLGQFDEAVTPGKLRSAFKALGFTGMVEVALFADILTLKEALEFDSHVKEKGDYQLTSCCCPVWISMIRNIYHELMPHVPGAVSPMVACGRMIKRMYPDAVTVFAGPCLAKKKEAREPDIADAVDYVLTFQEVKDIFEAADIHPEELEDDQKEHASKAGRLYARTGGVSQAVSEMVEQLRPDRSIAVHAEQANGTKECMAMIKRIQNKETDANFFEGMGCIGGCVGGPKAILHKEEGTKFVDEYGQEAPFKTPLENPYVRKV…	[FeFe] Group B	[FeFe] Group B	Evolving	Labile	1	[FeFe]-centre, 2 x [4Fe4S] clusters	None	1.95827	3.28665	0	2.23292	1.03069	3.30612	1.61778	3.56212	2.958	0	0	8.76745	6.12988	1.86457
WP_016146243.1	MRGVYTSINEIRRRVYTEIARMAYESDDYAKTMEGLPYQILPGERASYRDSIFLERAIVGERLRLAMGMPVRTAAADKPISDGIEKCLTEEQYYEPPLINIIKFACHACPEKQIVVTEGCQGCLAHPCTQVCPKDAIHIINGRSVIDQEKCIKCGRCQEACPYNAIIKQERPCAKACGVNAIHSDENGCAEINYDKCVSCGMCLVNCPFGAIADKAQIFQVIQAIKKGEKVYAAVAPAFVGQFGPKVTPEKLRAAMKALGFANVIEVAVGADLCATQEAIDFLDHVPEKIPFMATSCCPAWSMMAKQEFPEYKECISMVLTPMVLTGRMIKKRHPEAKIVFIGPCAAKKLEARRRSVRSDIDYVLTFEEMMGLFNAKNIDLESIEAEEALSKASTDGRN…	[FeFe] Group B	[FeFe] Group B	Evolving	Labile	1	[FeFe]-centre, 2 x [4Fe4S] clusters	None	8.3817	10.2273	9.4686	3.34938	16.491	4.95918	8.8978	7.12424	8.13451	10.9465	10.4364	5.84497	7.35585	18.6457
WP_004607406.1	MHHKYTEIRIPIEADNPAIQRHEDLCIKCGQCRQVCEREIGVGRLYDLVSTKDTAICIHCGQCANVCPVNSITEVYEYGEVKEAIKDPDKIVIFSTSPSVRVGLGETFGMAPGSFVEGKMVAALRALGADYVLDTNFSADLTIMEEASELVERITEKKKPLPQFTSCCPAWVKFAETFYPELLPNISSAKSPIGMQGPTIKTYFAKKNNIDPKKIVNVAVTPCTAKKFEIRRGEMNISAKANGSEGMRDMDHVITTRELAMWLKEEGIDIGVLEDEAYDSLMGPASGAGVIFGNTGGVMEAAARTAYYLVTGENPPSDYLCLEPVRGMEGVREATVEMGGLPIRLAVIHGTENARTFIEQMKKEDKSYDFIEVMTCKGGCIGGGGQPKTQVPMTDEVRK…	[FeFe] Group A1	[FeFe] Group A1	Evolving	Labile	1	[FeFe]-centre, 2 x [4Fe4S] clusters	None	0.946428	1.51831	1.18357	1.11646	1.03069	0.826529	0.808891	0.712424	0	4.97566	1.04364	0	1.22598	1.86457
WP_003507872.1	MADITIKINGRTVTAPAGSTILTAARLAGIEIPTLCFLKEINEIGACRICVVEVKGARTLVASCVYPINEGMEVWTNTPQVLASRKKTLQLLLSNHERKCLSCVRSANCELQALCRELGVDDEGLYDGEKTPSVIDDSAAHMLRDNSKCILCRRCVAVCESIQGVGVIGANDRGFVTNIGSAFNMGLGETSCVSCGQCIAVCPTGALQEKDFTDKVFAAIADPAKHVIVQTAPAVRAALGEEFGYPIGTGVEGKMVSALKMLGFDKVFDTDFSADLTIMEEAHEFLDRVQNGGVLPLITSCSPGWIKYCEHYFPDMTKNLSSCKSPQQMFGAIAKSYYAQKAGIDPKDIVSVSIMPCTAKKFEVGRDHQAANGVPDVDIALTTRELARMIRKAGIKFTA…	[FeFe] Group A3	[FeFe] Group A3	Bifurcating	Labile	4	[FeFe]-centre, 3 x [4Fe4S] clusters, 1 x [2Fe2S] cluster	NADH dehydrogenase, thioredoxin, thioredoxin	6.54329	8.04023	13.0193	7.81522	6.18412	3.30612	3.23556	5.69939	11.0925	4.97566	8.34913	8.76745	12.2598	2.79685
WP_015572916.1	MVNIIINRQKVCVPEGTTILEAAKKIGINIPTLCYLKGINEIGACRVCIVEVAGTSRLVTSCNTPVTEGMEVFTNSARVREARKTNVELILSQHHTNCPTCVRSGNCKLQKVANDLNLVTDEYPIHYAKTRWTTTFPLVRDAGKCIKCMRCVQICDKIQSLNVWDVQNTGSHTTVDVSRGREIKASDCSLCGQCITHCPTGALQERDDVSRIFSMNGDLNNPDKITVVQIAPAVRAAWGEEFGLSREFATDKRLVAALRRMGFDYIFDTTFSADLTIMEEGTELIERLKHREEFQWPMFTSCCPGWVRFLKSQYPDMEGQLSTAKSPQQMFGAVTKSFFAAKLGVDPDNVTCISIMPCVAKKQEADLPTMYDGSVKDVDYVLTTREICRLIKAEQIDVF…	[FeFe] Group A2	[FeFe] Group A2	Evolving	Labile	2	[FeFe]-centre, 3 x [4Fe4S] clusters, 1 x [2Fe2S] cluster	NADH-dependent glutamate synthase	1.59008	2.31875	1.18357	3.34938	2.06137	0	0.808891	2.13727	0.739501	2.9854	4.17457	2.92248	1.22598	1.86457
WP_022740096.1	MTRSVIDPITRIEGHLRVEMEVENGVVADAWVSGGCFRGMELVVQNRTPEDAAQIVERICGVCPVSHAHASSIAGDKAYGITISNNARIVRNLLEGAQFLHSHILWLYNLAALDYVNPLNALQANVDDAYAVALENGLALHSDLNQLYEKLAAFADNGQLSIFSGNWFDADGGEAYVDNPEANLILTSHYLEALKMQARSSEMAALLGGKMPHVMTSIPGGNMWVPTESKLDDLLAMATEVRDWVNDTVLADTVMLAKLYPEVLTFGKGCGRYIAWGVFEGPDWPYGDNYTEQMLNRYLPMAVLDEQFQASDVQENLITEYMGRSWYKGSETYTSPYFVTDPDFTEYNVDDRYSWVKAPAYDGKPMEAGSMARIFAAYVRGVPFIKEQVDAVLGILGAK…	[NiFe] Group 1a	[NiFe] Group 1i	Anaerobic Uptake	Sensitive	3	[NiFe]-centre, 3 x [4Fe4S] clusters	Cytochrome b	1.70825	0.760236	3.55072	6.69876	0	0	0	0	1.479	0.995132	2.08728	0	0	0
WP_002849014.1	MRSCLTLKKSNCKNCYKCIRYCPVKSIRFSGNQAHIIEQECILCGQCVVVCPQDAKQIVDESEKVRVLLQSGSPVVVSLAPSFIANYDGAGIEQMRDALKKLGFYDVEETAVGATHVKREYERILKEENRDVVISSCCHSVNLLIQKYFPDLLPMLADVISPMQAHCADIKRRIHDAKTVFIGPCVSKKDEAQHYGDTVDAVLTFEELSVWLKEENIEIERGFSADENSRARFFPTAGGILKTMDCDLPDYTYIAIDGIEKCISVLRELEKGSIHKCFIEMSACKGSCIGGPVMENARYTPVEDQMLIARYAGSKDYDVEQPDKLYMKKQFTLIDLGHAQPTEPEIHQILAQMGKFDTSDELNCGSCGYNTCREKAIAIYQGKADISMCLPFLKDKAES…	[FeFe] Group C	[FeFe] Group C3	Sensory	Labile	3	[FeFe]-centre, 2 x [4Fe4S] clusters, PAS domain	Phosphatase, thioredoxin	11.0936	9.34805	15.3865	6.69876	8.2455	15.7041	4.85335	15.6733	8.87401	7.96106	4.17457	13.1512	9.8078	12.1197
WP_003020884.1	MIMGFMTIDGRKVEFTDEKNVLSVIRKAGIDLPTLCYHSELSTFGACRLCTVEDDRGRTFASCSEEPRDGMVIYTNSGRIKKYRKMIVELLLSAHCRDCTTCVKSGECKLQELAHRMNITTVRFQNTREEKPLDTSSPALIRDPNKCILCGNCVRACRELQGLEVLGFTHRGTDAMVTPAFDKPLSETDCVSCGQCRVFCPTGAISIRTNMDEVWDAINDPDTRVIAQVAPAVRVAVGDAFGLTKGHSVMGKLVAVLHRMGFDEVYDTTFAADLTIMEESKEFLNRVEKNEKLPLLTSCCPAWVKFVCDQYPEFKDNLSTCRSPQGMFSAVIKEYYKNPERSQNKKTFVVSIMPCTAKKMEILRSNNFTHGEQDTDIVLTTTEIIRMINNSGIDFASQE…	[FeFe] Group A3	[FeFe] Group A3	Bifurcating	Labile	3	[FeFe]-centre, 3 x [4Fe4S] clusters, 1 x [2Fe2S] cluster	NADH dehydrogenase, thioredoxin	5.12	3.85188	2.36715	3.34938	11.3376	3.30612	3.23556	7.12424	6.65551	3.98053	2.08728	1.46124	6.12988	2.79685
WP_015518172.1	MSYLRLKKSNCKNCYKCIRHCPVKSIRFSDGQANIVEDECILCGMCFVACPQNAKQIRNDVGKAKELIVSGTPVYVSIAPSFVANYDGIGITALNDALKKLGFAGAEETAEGAQLVTEQYEKLVADGEHKIIISSCCHTVNTLIQKYYPQALPYLAQVKSPMLAHGEILKKKYPGCHTVFIGPCLSKKAEADAYAGAIDCVLTFEELTGWLKEENIEVCPVSDNAGRSNRAKTRLYPTTSGILRSMNKDNPEYLYMAIDGVENCRNALRDIIDGNVGKCFIEMSACVNSCIGGPAMDKKHEGVIHERRAVDEFAGSGRFDTVELADMTKSLPFISMQKTMPGSKAIEEILRKMNKSDPSQELNCGSCGYDTCREKAIAILQGKADLTMCLPYLKEKAES…	[FeFe] Group C	[FeFe] Group C3	Sensory	Labile	2	[FeFe]-centre, 2 x [4Fe4S] clusters, PAS domain	Phosphatase	3.88133	3.01782	3.55072	3.34938	3.09206	5.78571	3.23556	4.27454	2.958	2.9854	5.21821	2.92248	1.22598	2.79685
WP_022418208.1	MLNIKIEGVPYQVEEGLTILEAAKKCGYEIPSLCSFNHGECSQGSCRVCLVEATGARGLVASCVYPVSEGMEIKISTPKATEARRTSVELLLSNHNQNCQQCDKNGKCELLHVAKLVGAREGMYAGAKTPATIDKLSPSIYRDTSKCILCGRCVARCKNAHGLGILGFEKRGFNTIVAPAENRSFANSPCILCGQCVTVCPTGALMEVSDVAKVDEAFAKGKYVVVQTAPAVRAALGEEFGDKVGTLATGKMVAALRRLGFKKVFDTNFGADLTIMEEATELLGRIKDGGVLPMITSCSPGWINYCEYNYADLIPHLSSCKSPHEMMGAILKTYYAEKTGVKPEDMFVVSIMPCTAKKYEAQREELKTNGLSDVDAVLTTRELARIIRRAGIMWNRLPE…	[FeFe] Group A3	[FeFe] Group A3	Bifurcating	Labile	4	[FeFe]-centre, 3 x [4Fe4S] clusters, 1 x [2Fe2S] cluster	NADH dehydrogenase, thioredoxin, thioredoxin	0.784485	1.37692	0	0	1.03069	0.826529	0	2.8497	2.958	1.99026	2.08728	0	1.22598	0
WP_028515986.1	MENITVKINGVELEVPKGTTVLEAAHMAGFEIPTLCYMKEINEIGACRICVTEVNEGRGFRLVAGCVYPCSNNMEILTNSPKVIESRKRTLELILSTHDRKCLSCVRSGNCELQKLAKDYGVEDATVYDGVKNEYEVDNSAPHMYRDNNKCILCRRCVAVCAKTQGIGVIGANERGFKTYIGSAFDMGLGETSCVSCGQCIAVCPVGALSEKDYTKEVMAAIADPEKTVLVQTAPAVRAGLGECFGNPIGTNAEGKMVAALRRLGFDKVFDTDFAADLTIMEEANEFLDRFKNGGTLPLITSCSPGWVKFCEHYYPDLLDHLSTCKSPQQMFGATAKTYWAQKMGIDPKNIVMVSIMPCTAKKFEIGRPDQSAAGVPDVDYALTTRELGRMIERAGILF…	[FeFe] Group A3	[FeFe] Group A3	Bifurcating	Labile	3	[FeFe]-centre, 3 x [4Fe4S] clusters, 1 x [2Fe2S] cluster	NADH dehydrogenase, thioredoxin	5.32976	4.2124	9.4686	3.34938	4.12275	0.826529	5.66224	8.54909	3.6975	3.98053	5.21821	4.38373	6.12988	1.86457
WP_002568888.1	MVTNDATILRLKHDVLYEVAKAAWEGNLDEKREQIPYSMIPGPQATYRCCIYKEREIIRQRVRLAEGKCPTGKDTSNVVQVINAACEECPIASYIVTDNCRKCMGKACQNSCNFGAISMGRERAYIEPGKCKECGKCSQACPYNAIAHLERPCKKICPVDAITYDEYGICVIDEKKCIQCGACIHSCPFGAIGSKTFMVDVIRLIKAGKRVVAMVAPATEGQFGPDITMASWKIALKQLGFADMIEVGLGGDMTAAYEAEEWAQAHKEGKKMTTSCCPAFVNMIKQHFPMLLENMSTTVSPMCAVSRMIKSGDPDTVTVFIGPCIAKKSESLDLNVKGNADYAMTFGEIRAMMRAKGVELQPAENDYQESSVFGKRFGNGGGVTAAVLECLKEMDENTD…	[FeFe] Group B	[FeFe] Group B	Evolving	Labile	1	[FeFe]-centre, 3 x [4Fe4S] clusters, 1 x [2Fe2S] cluster	None	2.18884	2.85793	1.18357	4.46584	5.15343	0	1.61778	0.712424	4.437	1.99026	2.08728	0	4.9039	3.72913
WP_005680505.1	MEDKQITLQIDGHFITVPEGSTILEAATKIGINIPTLCHIDLKGTCIKNNPASCRICVVEVIGRRNLAPACATRCTEGMVVKTSTLRVMNARKVVAELILSDHPNDCLTCPKCGNCELQTLALRFNIREMPFNGGELSPRKREITASIVRNMDKCIFCRRCESVCNDVQTVGALSAIRRGFNTTIAPAFDRMMTESECTYCGQCVAVCPVGALTERDYTNRLLDDLANPDKVVIVQTAPAVRAALGEEFGFPPGTVVTGKMVYALRELGFDYVFDTDFAADLTIMEEGSEILNRLTCYLNGDKSVRLPILTSCCPAWVNFFEHHFPDLLDIPSTARSPQQMFGSIAKSYWAKKMGIPKEKLVVVSIMPCLAKKYECARDEFKVNGIPDVDYSISTRELA…	[FeFe] Group A3	[FeFe] Group A3	Bifurcating	Labile	2	[FeFe]-centre, 3 x [4Fe4S] clusters, 1 x [2Fe2S] cluster	NADH dehydrogenase	2.78044	1.71072	0	0	0	6.61223	0.808891	9.26151	2.958	3.98053	0	1.46124	0	1.86457
WP_006778972.1	MGMDKFYHSVRLDPALCKGCINCIKRCPTQAIRVRNGKAQINGKFCIDCGECIRVCPHHAKHATYDKLDVMKQYEYTVALPAPSLYGQFNNLDDVNIVLNGLLLMGFDDVFEVGAAAEIVSEATRSYLTEHEDQLPVISTACPSVVRLIRVRFPNLIPHLLPLNPPVEVAACMAVERAMKKTGLAREKIGIIFISPCPSKVTYVKSPLGTEKSEVDHVLAIKEVYPQLLSYMKVVGEDGPEIGTSGKIGVSWGRSGGEASGLFTENYLAADGIENVIRVLEDLEDQKLPSLKFVELNACSGGCVGGVLTVENPYVAEVKLKRLRKYMPVARSHMEADAVDCVPWTTGVQFEPVFRLGDNMMESFSRLERVERLCKKFPGLDCGSCGAPTCKALAEDIVR…	[FeFe] Group C	[FeFe] Group C1	Sensory	Labile	2	[FeFe]-centre, 2 x [4Fe4S] clusters, PAS domain	Histidine kinase	11.2424	9.11737	15.3865	15.6304	9.27618	6.61223	16.9867	3.56212	12.5715	10.9465	6.26185	5.84497	13.4857	5.5937
WP_007656765.1	MENIKLTIDNREVEVPKGTTILDAAKSMGIRIPTLCHMKLEDLHYENNPGACRICVVEIEGRRNLAPSCKMECTEGMVVRTHTPRVMNARKTVMELILSNHPAGCLTCSSNGYCELQTIAHDLGIREIRYQGEQSTFEIDRSPSIVRNMNKCIMCRRCETMCNNIQTVGALTAVNRGFNAAVSTAFERDIAGSTCSYCGQCVSVCPVNALSGCNTQQPVLDALANPAKIVIAQTAPAVRTALGRDFGCEPGTLVTGKMVSALRQLGFDYVFDTDFAADLTIMEEGTELLQRLSKYLSGDEEVKIPMMTSCCPGWVSFVEQHFPELRDNLSTAKSPQQMFGAIAKSYFAEKLGVDRKDIVVVSIMPCLAKKYEASRPEFAVEGNPDVDISIYTRELARLI…	[FeFe] Group A3	[FeFe] Group A3	Bifurcating	Labile	3	[FeFe]-centre, 3 x [4Fe4S] clusters, 1 x [2Fe2S] cluster	NADH dehydrogenase, thioredoxin	23.7529	28.7341	20.1208	18.9798	19.5831	28.102	37.209	18.523	27.3615	27.8637	16.6983	73.0621	17.1637	10.2551
WP_027626440.1	MEEKALIITDEKTCVGCNQCIRYCPIFDANTAYIKDGENKVKINPDKCIHCGKCIEVCEHNCRDYIDDTEKFFNDLKNGKKISVLAAPAIRVNSANYKKLFGYLKSLGVKFFYDVSFGADITVWAYLKYIKENNINSIIAQPCPAIVNYIEKNNLDLLNSLCKVQSPLLCSAIYIKKYLKEDSSLAFLSPCIAKKDEIMNETSHGFVNYNVTFKKLLAYIINNNIDLSKYEEVNFNSDNGLGFLFSRPGGLKENIQAYDENLWVRQIEGQEVVYDYLDEYGERVKKNLQVPNVIDALNCEFGCNIGTGSIKERVFIDDIDVKFNNIKKEKNKKEISKIHKKFDKELNLKDFLRDYKVKSKEKVKEPSNAKYEEIFKDMLKYTQNSRSIDCAACGYVNCN…	[FeFe] Group C	[FeFe] Group C2	Sensory	Labile	1	[FeFe]-centre, 2 x [4Fe4S] clusters, PAS domain	Fusion with methyl-accepting chemotaxis protein	106.357	95.9735	129.01	61.4053	98.9459	123.153	93.8314	131.798	98.3536	50.7517	129.412	81.8296	101.756	113.739
WP_007862869.1	METINLKINGIAVTAPKGTTILEAARLAHIEIPTLCFLKEINEIGACRICIVELKNGKLVTSCVYPIEEGMEVFTNTPKVLDSRKKTLQLLLSNHNRSCLSCVRSGHCELQELAHELGVEDEAYYDGEKTPSEIDYSAAHMIRDNSKCILCRRCVAVCDNIQGIGVIGANHRGFATDIGSAFEMGLGETSCVSCGQCIAVCPTGALTEKDYTGDVFAAIADPAKHVIVQTAPAVRAGLGEEFGLPIGTDVEGKMAAALRRLGFDKVFDTNFSADLTIMEEAHEFLDRVQNGGVLPLITSCSPGWVKYCEHYFPDMTENLSSCKSPQQMFGAIAKSYYAEKAGIDPKNIVSVSVMPCTAKKFEIGRDDQDANGVPDVDISITTRELARMIKKSGIRFLDL…	[FeFe] Group A3	[FeFe] Group A3	Bifurcating	Labile	4	[FeFe]-centre, 3 x [4Fe4S] clusters, 1 x [2Fe2S] cluster	NADH dehydrogenase, thioredoxin, thioredoxin	6.09836	7.68242	13.0193	7.81522	8.2455	0	3.23556	4.27454	8.87401	5.97079	8.34913	14.6124	7.35585	0.932283
WP_006442445.1	MENMENINLKINGLDVSAPAGSTILEAARLAGIKIPTLCFLKEINEIGACRMCIVEVKGARNLVAACVHPVNEGMEVFTNTPQLIASRRRTLQLLLSNHDQKCLSCVRSGNCELQQLCKEYGVDDADYYEGDMTHYDLDESAAHMVRDNNKCILCRRCVATCEKTQGIGVIGANNRGFDTMIGSAFEMGLGETSCVSCGQCIAVCPTGALYEKDYTQQILDAIADPDKYVVVQTAPSVRAGLGEEFGYPMGTDVEGKMAAALRRVGFDKVFDTDWAADLTIMEEATELLDRVKNGGVLPLITSCSPGWIKYCEHYFPDMTEHLSSCKSPQQMFGAMLKTYFAEKEGIDPKKIVSVSVMPCTAKKFEIGRDDQDAAGVPDVDIAITTRELARLIKRCGIE…	[FeFe] Group A3	[FeFe] Group A3	Bifurcating	Labile	4	[FeFe]-centre, 3 x [4Fe4S] clusters, 1 x [2Fe2S] cluster	NADH dehydrogenase, thioredoxin, thioredoxin	9.26089	7.65375	15.3865	12.2811	12.3682	5.78571	4.04446	5.69939	9.61351	8.95619	4.17457	10.2287	7.35585	5.5937
WP_008152383.1	MAFTNNVMIVRHGLLAKLVKLWKENRLLEEIDRLPIELSPRKSKVIGRCCVHKERAVWKYKTLPLLGFDMQDEVDELTPLSEYAKQALLRSENKKENLMCVVDEACSSCVQVNYEITNLCRGCVARSCYMNCPKDAIRFKKNGQAEIDHDTCISCGKCHQNCPYHAIVYIPIPCEEVCPVKAISKDEYGVEHIDESKCIYCGKCVNACPFGAIFEISQVFDILQRLRNKEPMVAIVAPSILAQFAAPVEKVYGAIKSLGFLEVVEVAQGAMETTRREAEELKEKLAEGQPFMTTSCCPSYIQLAEKHIPDLKKYISTTGSPMYYTARIVKEKYPDAKIVFVGPCVAKRKEVKMDPCVDFTLTFEEIGSVLTGMDIKVEEAQPFSVLFNAVREAHGFAQT…	[FeFe] Group B	[FeFe] Group B	Evolving	Labile	1	[FeFe]-centre, 3 x [4Fe4S] clusters, 1 x [2Fe2S] cluster	None	3.93594	3.17162	4.7343	2.23292	2.06137	5.78571	8.08891	0.712424	2.2185	3.98053	3.13092	8.76745	0	0.932283
WP_014117537.1	MSQGIMYVDGQRVAFDGEKNVLAVIRKAGIDMPTFCYYSELSVYGACRMCVVEDENGKIDASCSMEPKDGMRIRTNTARLLKHRRMILELLLASHSKDCTTCEKNGKCRLQELASRFGIRHIRFSDTRTRHELDESSPAIIRDPNKCILCGDCIRVCEEMQGMGIIDFARRGSHLQVMPAFDRKLSETDCISCGQCAAVCTTGAITIRNEIGAAWRALHNPDKRVVVQIAPAVRVAIGEAFGLPSGNNAIGKTVSALKMMGAEEVFDSIFGADLTVMEESKEFLARLNNGGPFPMFTSCCPAWIKYLETENSKYLKNISTCKSPMEMFAAVLKDQYAEIDRQDGRETFHIAIMPCTAKKMESARKDFQHGGKPDVDLVLTTQELINMIKESGIRFTELE…	[FeFe] Group A3	[FeFe] Group A3	Bifurcating	Labile	3	[FeFe]-centre, 3 x [4Fe4S] clusters, 1 x [2Fe2S] cluster	NADH dehydrogenase, thioredoxin	30.9657	33.76	36.6908	41.309	40.1968	17.3571	21.0312	29.2094	35.496	52.742	34.4402	17.5349	30.6494	31.6976
WP_013771726.1	MHEGQESEHVTVTVDGRSMQLREGTTLLRALQAEGVDVPSLCHDGRLERANGSCGLCVVEVGTGADGATRDVKACITPVSAGMVVTTVNPRLREYRAVRLEQLLCDHNADCVAPCVQTCPANIDIQTYLHHVATGNFEAAIRVIKDRNPFPSACGRVCPHPCEAECRRNLVDEPVAINHVKRFVADWDRAREEPWTPRLADPSGKRIAVVGAGPSGLSAAYYAALAGHRVTVFEKEDRPGGMMRYGIPEYRLPKATLDEEIAFMEAIGVEIVTGKALGTHLRLDDLRREHDAVYLAVGSWRATPLKLDGEHLPGVHLGIDWLRGVVQGVDEPVGDTVVVVGGGNTAIDCVRTALRRGARDVKLVYRRTRDEMPAEPLEIEEALHEGVDMVFLAAPTGIT…	[FeFe] Group A1	[FeFe] Group A1	Evolving	Labile	1	[FeFe]-centre, 3 x [4Fe4S] clusters, 1 x [2Fe2S] cluster	None	7.9014	9.26643	2.36715	16.7469	7.21481	3.30612	5.66224	12.1112	5.91601	10.9465	9.39277	5.84497	8.58183	14.9165
WP_013931422.1	MTVKVFINGKQYEVPANSTVLEACNLAGVYVPTLCNHPRLEPTGACRVCVVEVEGSRNLQPACATKVADGMRIITRSERVERAVKFNLSLLLSRHPKDCMTCEVNGRCEFQDLIYRYNIKDIFGGEQPLSKVYDDSSPAIIRDLEKCIVCGRCVRACSELQGMDIYSMVDRGFESLPQTAFEMPVYDTDCIACGQCSVFCPVGAITENSQVRKVLEELEKHDKVLIVQTAPATRVALGEEFGLEPGSISTGKMVAALRRLGFDYVFDTNFAADLTIMEEGSEFLERLKNGGPFPMFTSCCPAWINMMEKLYPQFIPNVSSAKSPHQMLGAVVKTYFAKKINVDPKNIFLVSIMPCTAKKDDIIRPQHMINGVPAVDVVLTTRELAKLIKIKKIPFATLP…	[FeFe] Group A1	[FeFe] Group A1	Evolving	Labile	1	[FeFe]-centre, 3 x [4Fe4S] clusters, 1 x [2Fe2S] cluster	None	2.39617	1.70025	2.36715	5.5823	0	2.47959	3.23556	0.712424	2.958	2.9854	0	1.46124	0	2.79685
WP_006442603.1	MKTFEELYQAVLERKITLKEPLPSEYDPRHLDCLLHPKRYAPVVQEKECRECAFDRACLRSCIFDAIEIDGDGKARINPSLCTGCGVCIDACEEKRLSAGRDVLPAMKAVREAEGPAYMMVAPAFLGQFGDGISPGQLRMAFKALGFTGMVEVALFADILTLKEALEFDRHVKKQGDYQLTSCCCPVWIAMIRKIYHELMPHVPGAVSPMVACGRMIKRIHPDAVTVFAGPCLAKKKEAREPDICDAVDHVLTFQEVLDIFKAADIRPEEFEDSRKEHASKAGRLYARTGGVSRAVSEMVEQLRPDRSIAVRGEQANGTKECMAMIQRIKNKETDANFFEGMGCVGGCVGGPKAILDRETGTQLVDEYGQESPFRTPLENPYVRKILEELGIETVEELL…	[FeFe] Group B	[FeFe] Group B	Evolving	Labile	1	[FeFe]-centre, 2 x [4Fe4S] clusters	None	2.78997	2.22002	2.36715	3.34938	3.09206	1.65306	4.85335	1.42485	1.479	2.9854	2.08728	0	4.9039	1.86457
WP_015513457.1	MNKKFFHSVYLDESLCKGCINCIKRCPTQAIRVRNGKARITSQFCIDCGECVRTCSHHAKKIHIDSLDILNNYAYTVALPAPSLYAQFNNLDDVNILLTALIYLGFDDVYEVGAAAELVSEASRKYVDEHKDQWPFISTACPSVVRLIRVRFPNLIDHLLPILPPIEVAATLARKRAMAKTGLPADKIGIIFISPCPSKVTYVKSPLGTTRSEVDGVLAVKDVYPLLLPHMKIAEQHPMDLAISGRIGIGWGCSGGEAGGMITDSYLAADGIENVIRVLEDLEDEKFAKLQFIELNACSGGCVGGVLNVENPYVAKAKIKRLNKYLPVARTHSEDIPQKVELGWHTTVEYEPVFRIGDTMLESITKMKQIEELCNEFPGLDCGSCGAPSCRALAEDIVR…	[FeFe] Group C	[FeFe] Group C1	Sensory	Labile	2	[FeFe]-centre, 2 x [4Fe4S] clusters, PAS domain	Histidine kinase	1.47914	1.918	1.18357	0	3.09206	1.65306	0.808891	2.13727	4.437	1.99026	0	2.92248	1.22598	0.932283
WP_009277946.1	MAGSMRGVYTNLTEIRRNVFREVAKVCYAMGDDPGKTDSDIDDAFDELPFKILPGDVATYRESVFLERAIIGERIRLAMGLPLQGVERPARISDGFKEAETADLAYYEPPLINVIKFACNACKDNVYEVTNTCQGCLAHPCREICPKNAISFVDKRAFIDQDACIHCGMCAKTCPYQAIHHHVRPCAAACGMNAIGSDEHGRADIDYEKCVSCGQCLVNCPFGAIADKSQIAQVIWAIHSGQEVIAAVAPSFVGQFGGKGNVGKLREAFKLLGFSGVEEVALGADLCTMQEAEDFLEEVPDKLPFMGTSCCPAWSVMAKREFPEHANCVSMALTPMTLTARMIRAQHPNAKIVFVGPCAAKKLEAMRRSVRSEVDFVLTFEEMAGMMASKDIDYLSLED…	[FeFe] Group B	[FeFe] Group B	Evolving	Labile	1	[FeFe]-centre, 2 x [4Fe4S] clusters	None	0.986552	1.34963	0	0	1.03069	1.65306	3.23556	0	2.2185	0.995132	2.08728	0	0	2.79685
WP_005836595.1	MEKKQITLQIDRHYITVPEGATILEAARKIGIDIPTLCHIDLKGTCIKNNPASCRICVVEVEGRRNLAPACATRCTEGMVVRTSTLRVMNARKVVAELILSDHPNDCLTCPKCGNCELQTLALRFNIRTMPFNGGELSPRKREVTSSIVRNMDKCIFCRRCESVCNDVQTVGALGAIRRGFNTTIAPAFDKMMTDSECTYCGQCVAVCPVGALTERDHTNRLLEDLANPDKVVIVQTAPAVRAALGEEFGLPPGTLVTGKMVYALRELGFDYVFDTDFAADLTIMEEGAEILNRLTRYLQGDKSVRLPILTSCCPAWVNFFEHHFPDMLDIPSTARSPQQMFGSIAKTFWAKKMGIPREKLVVVSIMPCLAKKYECDREEFKTDGNPDVDYSISTRELA…	[FeFe] Group A3	[FeFe] Group A3	Bifurcating	Labile	2	[FeFe]-centre, 3 x [4Fe4S] clusters, 1 x [2Fe2S] cluster	NADH dehydrogenase	1.37734	1.02269	3.55072	0	0	2.47959	0.808891	1.42485	2.2185	0.995132	0	2.92248	0	0
WP_005952705.1	MFWNFFSFDVTLKFGAGAFVCGEETALIQSMQGERGEPKSKPPYPAQSGYLGKPTVVNNVETLLNVPLIIRYGSDWFREIGTESSPGTKVFALAGKVNNVGLVEVPMGTTLREIIFDIGGGIKNGKRFKAVQTGGPSGGCLTNKDLDISIDFDSLSAKGSIMGSGGMIIMDEDDCMVSIAKFFLEFTLDESCGKCTPCRIGNTRLYEILSRITEGEGRMEDLKLLEELSDTIKEASLCGLGQTSPNPVLSTLKEFREEYIQHIEDKTCLAGVCQKLTHYRITDKCVGCTLCARNCPVHAIVGTVKNNILFHKRFALNAEFVTTDVSLEQLQGHKGGRKDMVRLEIDGKRVEIREGKTILEAAKEIGIEIPHLCYMHLEEVGFKNDCSSCRICVVEVEGQ…	[FeFe] Group A3	[FeFe] Group A3	Bifurcating	Labile	3	[FeFe]-centre, 3 x [4Fe4S] clusters, 1 x [2Fe2S] cluster	NADH dehydrogenase, thioredoxin	19.3729	20.8851	17.7536	33.4938	18.5524	16.5306	17.7956	12.1112	19.227	20.8978	14.611	21.9186	31.8754	16.7811
WP_006778965.1	MENITIKINGTEVSAPKGSTILEAARIAHIEIPTLCFLKEINEIGACRMCVVEVKGARSLVASCVYPINPGMEVFTNTPKVLDSRKKTLQLLLSNHERKCLSCVRSGNCELQTLAKELGVEDEAYYDGAVTQSCPDDSAAHMIRDNSKCILCRRCVAVCEKVQGIGVIGANDRGFDTNIGSAFKMGLGETSCVSCGQCIAVCPTGALREKDYIDDVLAAIADPDKHVIVQTAPAVRAGLGEEFGYPIGTNVEGKMAAALRRIGFDKVFDTNFSADLTIMEEAHEFIERVQHGGVLPMITSCSPGWIKYCEHYFPDMTENLSSCKSPQQMFGAIAKSYYAEKQGLKPKDIVSVSIMPCTAKKFEIGRNDQAANGVPDVDYSLTTRELARMIKKLGIRFNE…	[FeFe] Group A3	[FeFe] Group A3	Bifurcating	Labile	4	[FeFe]-centre, 3 x [4Fe4S] clusters, 1 x [2Fe2S] cluster	NADH dehydrogenase, thioredoxin, thioredoxin	15.3027	13.7592	17.7536	12.2811	23.7058	8.26529	16.9867	12.8236	19.227	3.98053	11.4801	14.6124	22.0676	11.1874
WP_010740236.1	MKEVMITINGKICTAPEGSTILEAARKNNIEIPTLCFLKEINEIGACRMCVVEVKGARSLVTACVYPISEGMEITTNSKKVFDSRRVTLELILSTHERKCLSCIRSGNCELQKLCKEFNVADEDYFNGENCEYEFDDSAVHMVRNNNKCILCRRCVAACSKWQAVGVIGPNDRGFNTHIGSAYEQNLGDVPCISCGQCIVVCPTGAIHEKDQTQEVWEALEDPTKHVIVQTAPSIRVTLGEAFNMPIGTNVEGKMVAALRRIGFDKVFDTNVAADFTIMEEANEFLERVGNNGPFPMFTSCSPGWVKYCEHYHPELIPNLSTCKSPQQMFGALAKTWYAEKEGIDPKDIFVVGIMPCTAKKFEVTREDEAAAGYSDCDVALTTRELARMIDKAGVRFVE…	[FeFe] Group A3	[FeFe] Group A3	Bifurcating	Labile	3	[FeFe]-centre, 3 x [4Fe4S] clusters, 1 x [2Fe2S] cluster	NADH dehydrogenase, thioredoxin	1.78509	1.28081	5.91787	1.11646	0	0.826529	0	2.8497	0.739501	1.99026	0	0	1.22598	3.72913
WP_013255981.1	MKQSLAPVIQIDESKCVNCHACIAACPVKYCIDGSGSTVTIHHDLCIGCGKCIEACTHNARSVVDDTEAFFDALSRKEPMIAIVAPSVASSFPDSYLRLNGYLGSLGIEAFFDVSFGAELTVASYINHIKRDDPDLVIAQPCPAIVTYIEIYHPELIPYLAPAHSPMLHTIAMIREYRKEFADHNVAVLSPCIAKKREFAETKMGDYNVTFLMLKAYMKAKGITLSSYPEVDFTGPDAERAVMFSTPGGLMQTVERSSPELLSGIRKIEGVPGMYEYLAELKAVLDKGMQPRLVDCLNCDLGCNGGTGTGLSQAHADEIEYPIKKRRSEAIRKYGKGPLKPKVQAKKVDKIISQYWNEGLYRRKYRDLSNNFSLKTPNAEELEQIYKSMLKENEEDFLN…	[FeFe] Group C	[FeFe] Group C2	Sensory	Labile	1	[FeFe]-centre, 2 x [4Fe4S] clusters, PAS domain	Fusion with methyl-accepting chemotaxis protein	3.4687	4.63129	4.7343	0	1.03069	5.78571	0	9.26151	0	0	7.30549	2.92248	11.0338	6.52598
WP_021739954.1	MENITIKINGREVSAPQGSTILEAARLAQIEIPTLCYLKEINEIGACRMCVVEVKGARSLVTACVYPINEGMEVWTNTPKVIASRRKTLQLLLSNHDRKCLSCVRSGNCELQTLCREYKVDDEAYYDGERNKYELDTSAAHMVRDNNKCILCRRCSAVCEKVQGVGVIGANERGFKTYIGTAFDMDLGDTSCVSCGQCIAVCPTGALYEKDNTEEVFAAIADPEKYVVVQCAPAVRAGLGEAFGMPIGTDVEGKLAAALRRLGFDKVFDTTFSADLTIMEEAHEFLDRVQNGGVLPLITSCSPGWIKYCEHYFPEMTENLSSCKSPQQMFGAIAKSYYAEKMGIPKEKMVVVSVMPCTAKKFEIGREDENGAGVPDVDIAITTRELGRMIERASIRFTD…	[FeFe] Group A3	[FeFe] Group A3	Bifurcating	Labile	4	[FeFe]-centre, 3 x [4Fe4S] clusters, 1 x [2Fe2S] cluster	NADH dehydrogenase, thioredoxin, thioredoxin	4.11772	3.65519	1.18357	4.46584	6.18412	5.78571	5.66224	1.42485	2.958	1.99026	1.04364	7.30621	4.9039	3.72913
WP_010753129.1	MNEIEIFINGQSYYAPEGSTILQAAKANHIEIPTLCYLKEINEIGACRICVVEVAGVKNLVTACVYPIKEGMEITTNSKRVFESRKLTLELILSTHERKCLSCIRSGNCELQKLCKEFNVDDEDYYNGENNNWEFDDTAVHMVRNNNKCILCKRCVAACDKCQAISVIGANDRGFTTHIGSAYELGLGEVACISCGQCIVACPTGAIHERDQTEEVWQALEDPEKYVVVQTAPSIRVTLGEAFDLPIGTNMEGKMVAALRRLGFNKVFDTNVAADFTIVEEANEFLERVNNNGPFPLFTSCSPGWVKYCESYHPELIPNLSSCKSPQQMFGALTKTWYAEKMGIDPSKIFMVGIMPCTAKKFEVTREDESAAGYPDVDVALTTRELARMIDKAGLQFAN…	[FeFe] Group A3	[FeFe] Group A3	Bifurcating	Labile	3	[FeFe]-centre, 3 x [4Fe4S] clusters, 1 x [2Fe2S] cluster	NADH dehydrogenase, thioredoxin	3.34152	2.83657	2.36715	7.81522	5.15343	2.47959	0.808891	1.42485	1.479	2.9854	0	7.30621	2.45195	2.79685
WP_002848990.1	MKNKRVFDTKVQYLKYKVLREVAREAWDDTLLEDLLDIPKKIVSGKTPTMRCCVYKERAIIAERVKIAMGGDKENPNVIEVIDIACDECPAAGYEVTDSCRGCLAHRCEDVCPRGAISFDHNHVAHIDKSKCVECGRCSKVCPYSAITNRVRPCQNACKIKAISINEDGGAAIDNEKCISCGACVYQCPFGAITDKSFILDVIDMIKKNSRDKKSKLYAVVAPSISSQFTYAKLGQVVSGLKTLGFHAVVEAALGADMVAYSESKELVEKGFLTSSCCPAFVSYVKSAFPELTEHISHNPSPMAAIAKYIKDIEPSAKVVFIGPCTAKKAEAQLKEVKAYVDSVLTFEELQALFDSRDLDITQLEEEALDNASYFGRIFARSGGLSDAVAEAIKEQGIE…	[FeFe] Group B	[FeFe] Group B	Evolving	Labile	1	[FeFe]-centre, 3 x [4Fe4S] clusters, 1 x [2Fe2S] cluster	None	7.17229	7.76263	3.55072	11.1646	6.18412	5.78571	5.66224	10.6864	11.832	5.97079	8.34913	4.38373	8.58183	7.45826
WP_028088444.1	MVNLTIDGREITVKENTTIMEAASQNGIPIPKLCYLKGINEIAACRVCVVELEGKEKLITSCNNIAKEGMVIHTNSPKVRRHRRTTVELILSQHDCECVTCSRSGNCSLQTVANDLNIIDIPFKMEIERQPWNKDFPLIRDSSKCIKCMRCVQVCEKVQGLGVWDVEGTGSRTTINVAGHRTIEEADCALCGQCITHCPVGALRVRDDTEDIWDAIADPDKIVVAQVAPAVRTAWGEEFGLSDDEATVGKILDALKRMGVDYAFDTTFSADLTIMEEGTEFLHRFTAGELKERPMFTSCCPGWLRFIKSQYPHLVRQLSTAKSPQQMFGAVMKTYFAEKLGVSPQRIYTVSVMPCVAKKEEKEMEMFYQEYAGHDIDTVITTRELTKMIKSAHISPDTL…	[FeFe] Group A2	[FeFe] Group A2	Evolving	Labile	2	[FeFe]-centre, 3 x [4Fe4S] clusters, 1 x [2Fe2S] cluster	NADH-dependent glutamate synthase	7.34349	6.51008	1.18357	5.5823	6.18412	4.95918	16.1778	9.97394	11.0925	10.9465	3.13092	5.84497	2.45195	5.5937
WP_005981915.1	MSKHLSMDIRVPIELDNPSIMRFEEKCIKCGMCRDICRDYIGVHGTYSLKDTNDTAVCINCGQCANVCPASSITEKYEYQQIAEAVKNKDKIVIFSTSPSVRVALGEEFGMEKGSLVEGKMVSLLRALGGNYILDTNFAADLTIVEEASELIQRITTGSKPLPQFTSCCPAWVKYAEIYHPEILPNLSTAKSPIGMQGPTIKTYFAKKMNIDPEKIVNVAVTPCTAKKFEIRRDEMKDAGKKLGIEDMRDMDYVITTRELALWAKEAGVDFKALEESSFDKVMGESTGAGIIFGNTGGVMEAALRTAYEYVTHEKAPADLFELKEVRGMGGIKEAGIKVGDLTVNVAVIYGTENADKVIEKVKNGEKSYHFIEVMTCPGGCIGGGGQPKDLDAERDEIN…	[FeFe] Group A1	[FeFe] Group A1	Evolving	Labile	1	[FeFe]-centre, 2 x [4Fe4S] clusters	None	5.59571	5.02369	1.18357	2.23292	3.09206	15.7041	5.66224	5.69939	2.958	0.995132	2.08728	4.38373	12.2598	7.45826
WP_006566021.1	MSKHLPVDVRVPIDSDNPSIMRHEEKCIKCGQCKNICKDYISVLGTYSLAETKDRAVCINCGQCANVCPVESITETYEYQQVREAVKDPEKIVIVSTSPSVRAALGEEFGTEEGMFVQGKMVALLRALGADYVLDTNFSADLTIMEEASELIERITKGTKPLPQFTSCCPAWVKFAEIYYPELLDHISTAKSPIGMQGPTIKTYFAKLMGIDPEKIVNVALTPCTAKKFEIRREEMKDAGISYGKEDMRDMDYVITTREAALWANEEKIDFMGLEDSDFDKFMGEGSGAGVIFGNSGGVMEAALRTAYEFITKEKAPDILYDLKPVRGMEGVKEASLDIGDLTVNVAVVYGTGNARKMIDKVKSSDKQYHFIEVMTCPGGCIGGGGQPKDKEFKGQIIQ…	[FeFe] Group A1	[FeFe] Group A1	Evolving	Labile	1	[FeFe]-centre, 2 x [4Fe4S] clusters	None	35.374	36.9806	41.4251	26.795	37.1047	29.7551	43.6801	33.4839	34.017	37.815	36.5275	39.4535	36.7793	37.2913
WP_016147589.1	MVNVTINGITVSVPEGTTIKAAAAQAGIVIPTLCYLKDLNEIGACRVCCVEVEGERRMVTACNNPVREGMVVHTNSPRARETRRVNVELILSQHDCHCATCVRSGNCKLQELANDLGILVNPYEEDLPHGIHAMWTTTFPLYRDAKKCIKCMRCVQVCEKMQSLGIWELTGSGGRSTIDVSYNRRIKDADCALCGQCITHCPVGALRERDDVQRALDALADPDIVTVVQIAPAVRAAWGEAFGLAPEQATVARLTAALRRMGFDYIFDTTFSADLTIMEESAEFLERLKSGALRNGPMFTSCCPGWVRFLKSQYPDMTALLSSAKSPQQMFGATAKTWFAKKIGVDPKKLFCISIMPCLAKKSECDLSTMQNEDYGKDVDLVLTTREVDRMLRADQINV…	[FeFe] Group A2	[FeFe] Group A2	Evolving	Labile	2	[FeFe]-centre, 3 x [4Fe4S] clusters, 1 x [2Fe2S] cluster	NADH-dependent glutamate synthase	5.39315	4.9553	2.36715	8.93168	0	4.13265	10.5156	6.41182	1.479	6.96593	3.13092	5.84497	8.58183	3.72913
WP_027090514.1	MRGIYSSLTKIRRKVFVEVAKLAYEGNDYSRIEDLPYKIIPGEIATYRDSIFLERAIVGERLRLTMGLSLRPIDKPAPISKGIEDSIIADKYYEPPLINIIKFACNKCAEKKFEVSNGCQACLAHPCMEICPKKAISFKEGKAYIDQDKCIKCGLCKNACPYDAILKKERPCAKACGMNAIESDEYGNAQINYDKCVSCGMCLVSCPFGAIADKSQIFQLIQAIKEGDEIIAAVAPAFIGQFGAKVTPEILKKAMQELGFKDVVEVAIGADLCTIDEAKDFLEKVPDKQPFMATSCCPSWSMMAKKEFPEFKSYISMALTPMVLTARLIKEKHPNSRVVFIGPCAAKKLEASRKSVRSEVDFVLTFEEIGAMFEAKGIDFASLQPNEDDPFTQASSDGR…	[FeFe] Group B	[FeFe] Group B	Evolving	Labile	1	[FeFe]-centre, 2 x [4Fe4S] clusters	None	2.26292	2.84566	1.18357	1.11646	2.06137	4.13265	0.808891	4.27454	0.739501	0.995132	2.08728	5.84497	3.67793	3.72913
WP_027642167.1	METINLKINGIAVTAPKGSTILEAARLAHIEIPTLCFLKEINEIGACRICIVELKNGKLVTSCVYPAEEGMEVYTNTPKVLDSRKKTLQLLLSNHNRSCLSCVRSGHCELQELAHELGVDDEGYYDGEVTPSEIDTSAAHMIRDNSKCILCRRCVAVCENVQGIGVIGANNRGFSTSIGSAFEMGLGETSCVSCGQCIAVCPTGALTEKDYTADVFAAIADPKMHVIVQTAPAVRAGLGEEFGLPIGTDVEGKMAAALRRLGFDKVFDTNFSADLTIMEEAHEFIDRVQNGGVLPLITSCSPGWVKYCEHYFPDMTENLSSCKSPQQMFGAIAKSYYAEKSGIDPKDIVSVSVMPCTAKKFEIGRDDEDANGMPDVDISITTRELARIIKKAGIKFLDL…	[FeFe] Group A3	[FeFe] Group A3	Bifurcating	Labile	4	[FeFe]-centre, 3 x [4Fe4S] clusters, 1 x [2Fe2S] cluster	NADH dehydrogenase, thioredoxin, thioredoxin	6.31777	5.55479	16.57	5.5823	3.09206	4.95918	4.85335	2.8497	7.39501	1.99026	8.34913	7.30621	7.35585	0.932283
WP_027398671.1	MSTIVIDAEKCIGCNSCVRVCPTHVANVAKFNDQGKLIIEIDDVNCIKCGECIKACSSHGARTYKDDTQMFLQNLKQGEKITVIVAPAIKVAFKNQWKNVISWLRSIGVKTIIDVSFGADICTWGHLELIKKNEDIHLISQPCAAITNYILKYKPKLKEYLSPVHSPMLCSAIYIKKYLNINGKIAALSPCIAKKDEFEKTDLVDYNVTFKALKELFEKQNINLSSFKYDEDNLFDNKDALDGSIYPRPGGLKSCIETHMPHLKVINSEGPDKVYKQLDDYMNCSKSSLPSVFDVLSCEYGCISGPALGEECDLFTMYNIMHSAENETKKLRKKNKHFGKDKQFELFNKELELEDFIRDYSKQEMVNLQNLSDRQIEEAFKKLDKYTDKDKTIDCHACG…	[FeFe] Group C	[FeFe] Group C2	Sensory	Labile	1	[FeFe]-centre, 2 x [4Fe4S] clusters, PAS domain	Fusion with methyl-accepting chemotaxis protein	2.56771	2.86162	5.91787	1.11646	0	2.47959	1.61778	4.27454	5.91601	0.995132	2.08728	2.92248	2.45195	2.79685
WP_006861102.1	MGTMTIDGRKVTFTDEKNVLSVIRNAGIDIPTLCYHSELSTFGACRLCTVEDDRGKTFASCSEEPRDGMVIFTNTGKLRKYRKLIIELLLAAHCRDCLTCEKSGDCNLQTLAKRFGVMEVRFENYKERRPLDFSSPSIVRDPNKCILCGNCVRVCEELQGIGALGFAHRGSDAMVMPAFDREIATTDCVNCGQCRIFCPTGAISIRHNRGEVWEALSDPDTRVVAQVAPAVRVAVGDAFGLPKGRSVMGKIVNVLHRMGFDEVYDTTFGADLTIMEESAEFLERVQSGEKLPLLTSCCPAWVKFVGEHYPEFEENVSTCRSPQGMLSAVVKEYFRDPANSGGKKTVMVSIMPCTAKKMEANRPNSYTKGEKDTDFVLTTTELIDMIKTTGIDFAELEPE…	[FeFe] Group A3	[FeFe] Group A3	Bifurcating	Labile	3	[FeFe]-centre, 3 x [4Fe4S] clusters, 1 x [2Fe2S] cluster	NADH dehydrogenase, thioredoxin	15.081	13.8329	4.7343	8.93168	27.8285	19.0102	6.47113	23.51	23.664	6.96593	7.30549	8.76745	26.9715	9.32283
WP_013273980.1	MDKFYHSVRLDEELCMGCINCIKRCPTQAIRVRNGKAQINSKFCIDCGECIRVCPHHAKHATYDKLEVLKQYEYTVALPPPSLYSQFNNLDDVNIVLNALLMMGFDDVFEVSAAAELVSEATREYLSENPDKLPAISTACPSVVRLIRVRFPNLIPNLLPLNPPVEVAAILAAQKAMEKTGLDRDKIGIIFISPCPSKVTYVKSPLGTEHSEVDKVLAIKDLYPRLLSCMKAVGEDPPEIGTSGKIGVSWGRSGGEASGLFTEDYLAADGIENVIRVLEDMEDQKFTNLKFVELNACNGGCVGGVLTVENPYVAEVKLKRLRKYMPVARSHMHAGAEELVKWTNEVQYEPVFNLGETMMESFARLNQVERLLKKFPGLDCGSCGAPTCKALAEDIVRGE…	[FeFe] Group C	[FeFe] Group C1	Sensory	Labile	2	[FeFe]-centre, 2 x [4Fe4S] clusters, PAS domain	Histidine kinase	4.83562	5.37243	1.18357	5.5823	5.15343	3.30612	8.08891	5.69939	6.65551	4.97566	9.39277	2.92248	7.35585	0.932283
WP_026485852.1	MDKVSVTIDGVKVEVPKNYTILQAAKEAGVDIPTLCYLKGINEIGACRICVVEVQGAKALQASCVAPVSDGMVVRTNTPVVREARKATLELILSDHDRSCLTCIRNGNCELQALANEFNISELRFEGARHQSEIDDLSASIVRNSNKCVLCRRCVSMCSNVQTVNAIGVNERGFRSVVSPIYGMSLADSPCINCGQCVISCPTGALYEKDHTARVWEALADPEKYVVAQTAPAVRVALGEEFGMPIGTRVTGKMVAALKRLGFDKVFDTNFGADLTIMEEGNELLHRLKNGGKLPMITSCSPGWVKFCEHYYPEFLDNLSTCKSPHQMLGAIIKSYYAEKMGIDPSKIYVVSIMPCTAKKFEIDRPEMEHDGLRDVDAVLTTRELARMIKEANINFNRL…	[FeFe] Group A3	[FeFe] Group A3	Bifurcating	Labile	4	[FeFe]-centre, 3 x [4Fe4S] clusters, 1 x [2Fe2S] cluster	NADH dehydrogenase, thioredoxin, thioredoxin	1.24979	0.998787	3.55072	0	0	0	3.23556	0.712424	0.739501	0.995132	0	1.46124	0	2.79685
WP_015393386.1	MVNLKIDNITVEVNEGTTILEAAKLAGIPIPSLCYLKGINEIGACRVCVVEVKGKDKLLPACNNMVESGMEILTNSPRVRETRRTNVELILSQHDCNCAFCVRSGNCNLQTISNDLGILSLSYDKNVEPYIWNESFPLIRDAGKCIKCMRCIQICNKIQSLNIWDVANTGSRTTVDVSYNRRIKNSDCSLCGQCITHCPVGALRERDDTVKAFSALADPDKITVVQIAPAVRAAWGEALGLTREEATVNRLVSALRRMGFNYIFDTNFSADLTIMEEGNEFIERISNKENNIFPMFTSCCPGWVRFLKSQYPDMVEQLSTAKSPQQMFGAVAKSYYAKILNVDPSKIFSISVMPCVAKKHEAEIPVMNDAGAGQDVDLVLTTREIERMIRAEHIICKDL…	[FeFe] Group A2	[FeFe] Group A2	Evolving	Labile	2	[FeFe]-centre, 3 x [4Fe4S] clusters, 1 x [2Fe2S] cluster	NADH-dependent glutamate synthase	2.98286	3.47282	1.18357	2.23292	4.12275	1.65306	7.28002	1.42485	2.2185	2.9854	2.08728	5.84497	4.9039	2.79685
WP_005583237.1	MVNLIIDNKKVRVPEGTTILDAAAVNHIPIPHLCYLKELNEIGACRVCVVEIEGINRLVTACNNVVEEGMVVFTNSPKVRETRRVNVELILSQHDARCAACVRSGNCSLQTIANDLGIIDIPYKEDLPYAKWTEGFPLVRNYEKCIKCMRCIQICDKIQDLHIWDLSNTGSRTNVDVSYNRRIEEADCALCGQCITHCPVGSLRERDDTQRVFDALADKDKITIVQIAPAVRAAWGEDLGISREFATVKRLVAALRKMGFDYIFDTNFSADLTIMEEGNEFVEKLNNRENEKFPLFTSCCPGWIRFIKSQYPDMIDQLSTAKSPQQMFGAISKTYYAELLHVDPERIFCVSIMPCIAKKYECDVSVLNDAGAGQDVDVVLTTREVARMIRAEHIIPEVL…	[FeFe] Group A2	[FeFe] Group A2	Evolving	Labile	2	[FeFe]-centre, 3 x [4Fe4S] clusters, 1 x [2Fe2S] cluster	NADH-dependent glutamate synthase	1.98864	2.22446	0	3.34938	0	3.30612	2.42667	2.8497	2.958	4.97566	2.08728	1.46124	0	1.86457
WP_007216264.1	MEEKQITLQIDRHYITVPEGSTILEAARKIGIDIPTLCHIDLKGTCVKNNPASCRICVVEVEGRRNLAPACATRCTEGMVVRTSTLRVMNARKVVAELILSDHPNDCLTCPKCGDCELQTLALRFNIRRMPYNGGELSPRKREVTSSIVRNMDKCIFCRRCESVCNEVQTVGALGAIRRGFNTTIAPAFDKMMSDSECTYCGQCVAVCPVGALTERDHTNRLLLDLENPDKVVIVQTAPAVRAALGEEFGLPAGTLVTGKMVYALRELGFDYVFDTDFAADLTIMEEGAEILNRLTRYMNGDKSVRLPILTSCCPAWVNFFEHHFPDMLDIPSTARSPQQMFGSIAKTFWAEKMGIPREKLVVVSIMPCLAKKYECDRNEFKTDGSPDVDYSISTRELA…	[FeFe] Group A3	[FeFe] Group A3	Bifurcating	Labile	2	[FeFe]-centre, 3 x [4Fe4S] clusters, 1 x [2Fe2S] cluster	NADH dehydrogenase	3.06308	2.93519	2.36715	0	4.12275	6.61223	2.42667	2.8497	1.479	1.99026	0	11.6899	2.45195	0
WP_013273987.1	MENITIKINGMDVSAPAGSTILEAARLAHVEIPTLCFLKDMNEIAACRICTVEINGGRLAASCVYPINPGMEVLTNTPKLREYRKKTLQLILSNHDRSCLSCVRSGNCELQTLCKELGVDADDYYDGAKTPSTLDESAAHMVRDNSKCILCRRCSAVCEKVQGIGVIGPNERGFATIIGSAFDMGLGDTSCVSCGQCIAVCPTGALYEKSSIDEVAAAIADRSKHVIVQTAPAVRAGLGEEFGYPIGTNVEGKMAAALRRLGFDKVFDTNFSADLTIMEEAHEFIDRVQNGGVLPMITSCSPGWIKYCEHYFPDMTENLSSCKSPQQMFGAIAKSYYAEKMGLKPEDIVSVSVMPCTAKKFEIGRDDQDANGSPDVDYSMTTRELARMIKQAGIRFTEL…	[FeFe] Group A3	[FeFe] Group A3	Bifurcating	Labile	3	[FeFe]-centre, 3 x [4Fe4S] clusters, 1 x [2Fe2S] cluster	NADH dehydrogenase, thioredoxin	10.1071	9.26752	16.57	15.6304	7.21481	7.43876	8.08891	5.69939	12.5715	5.97079	9.39277	5.84497	17.1637	4.66141
WP_013623612.1	MGERLTDLVNTHEEKCQGCNKCIRHCPVDANVAYADEEGKIKVKVQAELCINCGECIEVCDHEAREFYDDTEAFFADLKNGKKITVISAPAVRTNFEDYKKIFGFLKARGVEYIYDVSFGADITTWAYLKAIKEKKLTSVIAQPCPAIVGYVEKYKPGLLNYLSPIHSPMMCTAIYLRKYKKISSSIAFLSPCIAKKNEMEKTNGIISYNVTYKNIEKYMKDNGLAMNSFEDKDFDFIDLSLGFLYSRPGGLKENIEAVIDHAWVKQIEGTEIAYEYLDHYQERIHNQKPVPLVVDILNCSQGCNIGSAACADRKMIDDIDHKFNQMKTETIDKNTKGRLTKKFRWIGEKFDKELKLDDFVREYDKDGAVPAKRIPSDSEAEQIFKSMYKNDEAACNIN…	[FeFe] Group C	[FeFe] Group C2	Sensory	Labile	1	[FeFe]-centre, 2 x [4Fe4S] clusters, PAS domain	Fusion with methyl-accepting chemotaxis protein	25.0791	26.1368	40.2415	15.6304	15.4603	23.1428	27.5023	28.497	32.538	18.9075	26.091	32.1473	29.4234	17.7134
WP_003534146.1	MTLDKDKCLGCTNCIKRCPTEAIRVREGKAQIISERCIDCGECIRVCPHHAKKARYDHLSVLEGWKYKIAIPAPALFGQFNNLDDIDIVLTGLKQMGFDDVYEVSRGAELVSDATRKLMADGRLPKPVISSACPAVVRLIRVRFPDLCDHVLNLNAPMEVSAMMAKRAASERTGIPIEEIGAFFITPCPAKVTDIKMPIGTEGSWCDGAIAISEVFPLLSHRMDKLETVEPIGQSGLIGVSWAGSGGESAALLNEKYLAADGIENVIRVLEELEDERIRELDFVELNACSGGCVGGVLCVENGYVAKARLQRLRKYLPVSQNHLDGGVPRDMEWTEPLEFAPVLKLSQNLEEAMQMMEEIDVICEGLPGLDCGSCGAPSCRALAEDVVKGVARTSDCVF…	[FeFe] Group C	[FeFe] Group C1	Sensory	Labile	2	[FeFe]-centre, 2 x [4Fe4S] clusters, PAS domain	Histidine kinase	10.3648	9.85461	18.9372	10.0481	8.2455	9.09182	1.61778	14.2485	11.0925	15.9221	7.30549	8.76745	8.58183	7.45826
WP_005035184.1	MDHLSSHKRIKVNVNHREIQVYSDLTILQALLQENLHIPHLCYDIRLERSIGNCGLCVVEVVEGEVIREVKACQTPIREGMVIHTQNPKLESYRKVRLQQILADHNADCVAPCVQTCPAGIDIQKYLRHASHGNFENALRVIKDRNPFPQACGRVCPHPCETQCRRNLVDTPVAINHVKRFIADWDISRDTAWLPEKEAPTGKRIAIVGGGPSGLSAAYYSAINGHEVTVFERQPEAGGMMRYGIPEYRLPKVTLDAEINHIQKLGVRLETGRSLGTHLRLEELRNNFDAVFLAIGSWRATSMNLEGENQDGVWQGINFLAAVTKRAPVHLGETVVVVGGGNTAIDCARVAQRMGAKKVQLLYRRTQEEMPAEPMEIEEALHEGVEMLFLTAPQAITAA…	[FeFe] Group A1	[FeFe] Group A1	Evolving	Labile	1	[FeFe]-centre, 3 x [4Fe4S] clusters, 1 x [2Fe2S] cluster	None	5.17823	4.77719	7.10145	5.5823	0	3.30612	12.9423	2.13727	9.61351	4.97566	7.30549	0	4.9039	1.86457
WP_006778913.1	MVTNDATVLRIKHDVLYEVAKLAWEGALDEKKEDIPYKLIPGPQARFRCCIYREREIIRQRVRLAEGLCPADGKDTTNIVQVIGAACEGCPIARFTVTDNCQLCMGKACQNSCNFGAISMGRDRAYIDPDKCKECGKCAQACPYNAIADLTRPCRKACPVDAITMDENGLVEIDESKCIQCGACIHGCPFGAIGSKSFMVDVIDMIRAGKKVVAMVAPATEGQFGADITMASWKTALKKIGFADMVEVGLGGDLTAAAEAAEWAEAYRDGKKMTTSCCPAFVNMIKQHFPMLLENMSTTVSPMCAVSRMLKEKDPETVTVFIGPCIAKKSETLDLNIKDNADYALTYSEIRAAMKAKNVNLEPEENIYQESSVFGKRFGNGGGVTAAVLECLKETGENT…	[FeFe] Group B	[FeFe] Group B	Evolving	Labile	1	[FeFe]-centre, 3 x [4Fe4S] clusters, 1 x [2Fe2S] cluster	None	3.59495	3.30036	3.55072	8.93168	2.06137	1.65306	3.23556	2.13727	3.6975	0.995132	1.04364	1.46124	9.8078	2.79685
WP_006876820.1	MEKEMVNIKINGMPFSVPKDSTILEAARYAGIQIPTLCYLKEINAIGACRICVVEVKGARSLVAACVYPVAEGMEIITNSKKVQQARKITLELILSTHKKECLSCVRSGNCELQKLCHDFKVDDEHRYDGNNPEWPKDDSAVHMVRDDNKCILCRRCVAACAKWQGIGVIGPNERGFNTHIACAFEQNLDEVACVSCGQCIVVCPTGAIYEKDQTDEVWAALNDPSKHVVVQTAPSIRATLGEAFGMPVGTNVTGKMVAALRRIGFEKVFDTDLAADMTIVEEAHEFVERVKNGGVLPMITSCSPGWIKYCEHYHPDMIPNLSTCKSPQQMFGATVKTWYAEKMGWDKKDIVVVGVMPCTAKKFEVRRDDEDAAGSGIPDVDIALTTREIARMIDRAGI…	[FeFe] Group A3	[FeFe] Group A3	Bifurcating	Labile	3	[FeFe]-centre, 3 x [4Fe4S] clusters, 1 x [2Fe2S] cluster	NADH dehydrogenase, thioredoxin	6.9541	6.92938	13.0193	7.81522	8.2455	4.13265	5.66224	2.8497	7.39501	9.95132	8.34913	8.76745	2.45195	4.66141
WP_007653239.1	MSERIVIDPITRIEGHLRVEAAIENGKIKDAYSSGTMVRGIENIVRDRDPRDAWVFVGRVCGVCTSIHSLCSVRAVENTLGISVPPNAEMVRNIMEAVLYMHDHTVHFYQLHALDWVDIVSGLKADPKAAALLAQQLSPWPKNTEGYFTEMQNKLKKFVASGQLGIFANGYWGHPAYKLTPEQNLIATIHYLEALEWQKEIVKVHAVFGGKNPHPNFLVGGMPCSIDLNEANAINAERLALVKQKLQEGKDFIDQVYIPDLLMIAGVYKDEWSKIGGGVSNYLSYGDFPLHGYAGVEDYMSPRGIVLDRDLSKVHPVDANSPEEIKEYIYHSWYKYTEGDKAGLHPYEGETNLEYTGPKPPYKHLNVDDKYSWIKTPRWKGHAMEVGPLARLVVAYAAG…	[NiFe] Group 1d	[NiFe] Group 1d	Aerobic Uptake	Tolerant	3	[NiFe]-centre, 1 x [4Fe3S] cluster, 1 x [3Fe4S] cluster, 1 x [4Fe4S] cluster	Cytochrome b	62.5662	64.258	60.3623	46.8913	81.4243	71.9081	60.6668	54.1442	70.9921	101.503	44.8766	113.977	35.5533	18.6457
WP_009141594.1	MSNSMRGVYTSLAQIRRTVFREVARLAYESQSGDYGWVDELPYEIIPGDVATYRESVFLERAIVGERIRLAMGLPLQGVDKPAKLSEGVAEAAKPETYYQPPLINVIKFACNACEENSYKVSDACQGCLAHPCREICPKGAITFKDKKAYIDQEKCIKCGRCANVCPYGAIQHHARPCAVACGMNAISSDEQGRAQIDYSKCVSCGQCLVNCPFGAIADKSQIFQVIQAILAGEEVIAEVAPAFVGQFGGKGNVDKLREAFKALGFTGMEEVALGADLCAVQEAEDFLEEVPDKIPFMGTSCCPAWSVMAKMEFPEHADCVSMALTPMTLTARLIRKQHPNAKIVFVGPCSAKKLEAQRKSVKSEVDFVLTFEEMAGMMEAKDIDYTRLAGEGSSDFEV…	[FeFe] Group B	[FeFe] Group B	Evolving	Labile	1	[FeFe]-centre, 2 x [4Fe4S] clusters	None	1.50462	1.40609	2.36715	0	2.06137	1.65306	0.808891	2.13727	0.739501	1.99026	2.08728	1.46124	1.22598	0.932283
WP_009203940.1	MVNITIDNHTIAVPSGTTIMEAAASIHIPIPKLCYLKDINEIGACRVCVVEIEGQDHLVTSCNNVVEEGMTIYTNSPKVRRNRKHTVEMILSQHDAQCATCVRSGNCTLQTVANDLNIVDSPYKKEICIEEWDTRYPLVRDASKCVKCMRCIQVCDKIQGMHIWDVSGTGARTTIGVSENRDIKTADCALCGQCITHCPTGALRERDDTDKLYRALEDKDTIVVAQIAPAVRAAWGESLGLSREEATVEKIVDALRRIGVDYVFDTTFSADLTIMEEGTEFVERFTNGDLDMYPMFTSCCPGWVRFIKSQYPQMVNRLSSAKSPQEMFGAVMKTAFAKKMNIDPDRIFALSIMPCVAKKDEREKPLFHGEFAGHGVDCVLTTRELDRLIRADHIDPKTL…	[FeFe] Group A2	[FeFe] Group A2	Evolving	Labile	2	[FeFe]-centre, 3 x [4Fe4S] clusters, 1 x [2Fe2S] cluster	NADH-dependent glutamate synthase	1.09402	1.15994	0	0	2.06137	1.65306	0	2.8497	5.91601	0	1.04364	0	0	0
WP_012808500.1	MPGTMRGVYTNLTEIRRKVFKEVSTLAYEKADKSVDEIARQMEELPYKIIPGDIATYRESVFLERAIVGERIRMTMGMPMQGVDQPENISDGLEEASRPEVYYQPPLINIVKFACNACEDNVYRVTNACQGCLAHPCREICPKEAISFVDKKAYIDQEKCIQCGMCFKVCPYQAIHHHVRPCAAACGMDAIGSDEHGRADIDYEKCVSCGQCLVNCPFGAIADKSQIFQVIQAINEGYTVVPIVAPSFVGQFGKGSVGRLREAFKEMGFAEVEEVATGADLCTVQEAEDFVKEVPDKLPFMGTSCCPSWSAMAKKEYPEHADAISMALTPMVLTARLVRKQNPESKIVFIGPCTAKKLEALRRSVKSEVDFVLTFEELAGMMESKGIDYTKLDDDNSDF…	[FeFe] Group B	[FeFe] Group B	Evolving	Labile	1	[FeFe]-centre, 2 x [4Fe4S] clusters	None	1.32193	1.14225	3.55072	1.11646	1.03069	0	0.808891	1.42485	1.479	1.99026	0	0	2.45195	0.932283
WP_013119651.1	MAVVQTIKERCQTCYSCIRNCPAKAIKVVEGQATVVEERCVSCGNCVRVCAQKAKVVDSRDMDLVKGFLSSDQTVVIMLAPSFPAAFAGVAADHLFEALLAMGFAHVEEVTTGVQLTVPKYQELLEKGDQECVIASYCPAVVGLIEKHYPQLISYLAPIDSAVTATGKYVKKKFPNAKVVLAGPCIAKKEEARSDKRHIIDAVLTFKELKELFSQAGIEVPKSKTEKNVGENFLPRLFPLPGGLIKNLKLVDGFIPELASVEGIDNCLNILQNMSQGKVKPRFIDILFCQGCIDGPEIDSDKDLLTRKALVFDYAQKKLNNPARKLPFLDLTRTYSDQSRQLPYPSENEIRKILKHTYKIKPEDELNCGACGYNTCREKAIAVYQGLAEIDMCLPYLLH…	[FeFe] Group C	[FeFe] Group C3	Sensory	Labile	1	[FeFe]-centre, 2 x [4Fe4S] clusters, PAS domain	Fusion with transcriptional activator	1.6393	1.70242	2.36715	2.23292	2.06137	1.65306	0.808891	0.712424	0	3.98053	1.04364	1.46124	0	3.72913
WP_013273992.1	MATNDATLLRIKHQVLNEVAELAWEGKLEEKRNEIPYNIIPGPKAQFRCCIYREREIIRERIRLAEGLCPSGKDTKNVVQVISSACEDCPITRYVVTDNCQLCMGKACQSSCNFNAISMGRDRAYIDPDKCKECGKCSQACPYNAIADLTRPCKKSCPVDAITMDENGIVVIDESKCIQCGACIHGCPFGAIDSKTFLVDVINLINAGKRVVAMVAPATEGQYGPDITMASWRTALKKIGFQDVIEVALGGDLTAAAEAKEWAEAHKEGKKMTTSCCPAFVNMIKQHYPMLLENMSTTVSPMCAVSRMIKEKDPGVITVFIGPCIAKKSETLDLNIIDNADYALTLGEIHAMMEAKGVKLEPEENTYQAGSIFGKRFGNGGGVTAAVLECLKESGENTE…	[FeFe] Group B	[FeFe] Group B	Evolving	Labile	1	[FeFe]-centre, 3 x [4Fe4S] clusters, 1 x [2Fe2S] cluster	None	1.70706	1.81549	4.7343	1.11646	2.06137	0	1.61778	0.712424	0.739501	2.9854	2.08728	2.92248	1.22598	0.932283
WP_014261748.1	MNQLYTDIIQIRQNVFAEITRIAYSDEDLIEALENAPMKILPGEVSERRQSIFKERAIVGERLRLTLGLPVRKASEFRRLSEGIKAIDETERVYEAPLVNVIPFACNACPTKALEVTSTCRQCMAHPCIQVCPVGAITMGETQTHIDKEKCIKCGKCKEACPYNAIIQYDRPCAEACGVNAIGSDEYGRALIDHDKCVSCGQCMAHCPFGAIADKAQIYQLVKSIRNKKQKHIAIVAPAFVSQFGDKITPAQVFEGIKMLGFDDVVEVGLGADIATINEAKEFLHVVPNELPYLATSCCPAWVSMVNKMFPEVVPQVSDALSPMKFTVQHIRKTDPDVKIIFVGPCVAKKLEALGEEMKSYVDFVITFEELMGMFVGKGIDLAAIETDNVINDSSAIGR…	[FeFe] Group B	[FeFe] Group B	Evolving	Labile	1	[FeFe]-centre, 2 x [4Fe4S] clusters	None	1.19352	1.34319	0	1.11646	2.06137	1.65306	1.61778	0.712424	2.2185	0.995132	0	1.46124	2.45195	0.932283
WP_015424900.1	MAKTVNVFIDGHHLEVPETMTIIEAADKIGIYIPRLCYHPDLPPTGNCGVCVVEIAGNPTPKRACCTPVAEGMKIVTNSKKLRSYRKTVVEMILSNHDVTCPTCPANNKCELQSLANNLGVDSEALPNILVKTPADESSLSIIRDTNKCIGCGRCITVCNEVQTVYALTFAERGIDTHIDTAFSQGMANSPCVNCGQCTVYCPTGALHERSELDAVWEAILDPEKHVIVQEAPSIRVSLGEEFGMPLGSVTPKKMYAALRKIGFDSVMDTNFTADLTIMEEGTECVTKLKAGEKRPLITSCSPGWIKFMETYYPDLADCVSTAKSPMSMFGVLSKTYYAQEKGIDPAKIVSVAIMPCTAKKFEARRPELSDSGFQDTDYVLTTREFIRMIKEAGIDFAN…	[FeFe] Group A3	[FeFe] Group A3	Bifurcating	Labile	1	[FeFe]-centre, 3 x [4Fe4S] clusters, 1 x [2Fe2S] cluster	NADH dehydrogenase, thioredoxin	2.23401	1.75432	10.6522	1.11646	0	0.826529	0.808891	0	7.39501	0	3.13092	0	0	0
WP_023920581.1	MRGVETRIQEIRHKIFTEVARMAYHTEWSVKDRMEALPYKIIPGEKGNFRNDVFLERAIVGERLRLAMGLPYRSAAEHSPISDGIEAADKDETYYTPPLINVIKFACNACPEKRVHVTDGCQGCLAHPCMEVCPKDAVSLDRTTGKSVIDQEKCIKCGRCASVCSYNAIIVQERPCAKACGMDAISSDENGKANIDYDKCVSCGQCLVNCPFGAIADKSQIFQTIRAIQSGEKVYAAVAPAFVGQFGSKVTPGKLRAAMKALGFADVFEVAIGADLCAKQEAEDFLKEVPDELPFMATSCCPAWSVMAKKLFPEHAKCISMALTPMTLTARLIKQHNPDARVVFIGPCAAKKLEAMRRSVRSEVDFVLTFEEMTGIFSAKHVDLENIEEDPAGVSDAST…	[FeFe] Group B	[FeFe] Group B	Evolving	Labile	1	[FeFe]-centre, 2 x [4Fe4S] clusters	None	2.53349	2.31433	3.55072	2.23292	0	0	7.28002	2.13727	1.479	0.995132	3.13092	1.46124	1.22598	5.5937
WP_031366038.1	MKEVTIKINGKTYTAPEGTTILEAARLNNIDIPTLCFLKEINEIGACRICLTEVEGMNNLVTSCVYPITEGMSIKTNSDRVFKSRKTNLELILSTHERKCLSCIRNGNCELQKLCKAFNVDDEDYYNGENCEYEFDDSSVHMYRNNNKCILCRRCVAVCKKIQSVGVIGANDRGFNTHIGSAYEQDLGDVDCISCGQCIVVCPTGAIAEKDQTQEVWEALQDPTKHVVVQTAPSVRVTLGEAFQLPVGTNVEGKMVAALRRIGFDRVFDTNVAADFTIMEEATEFLQRVENNGPFPMFTSCSPGWVKYCEAYHPELIPNLSSCKSPQQMFGALIKTWYAQKNNIDPEDIFVVGIMPCTAKKFEVTRENQAAAGYTDVDIALTTRELARMIEKVGIRFNE…	[FeFe] Group A3	[FeFe] Group A3	Bifurcating	Labile	3	[FeFe]-centre, 3 x [4Fe4S] clusters, 1 x [2Fe2S] cluster	NADH dehydrogenase, thioredoxin	1.20644	1.16729	2.36715	1.11646	0	0	1.61778	2.13727	0	0	0	1.46124	3.67793	1.86457
WP_006859957.1	MRGVETRIREIRHRIFREVARMAYHTEWSVEKRIEELPYEIIPGEVGNFRNDVFLERAIVGERLRLAMGLPYRSAAEHAPLSDNISAADKAETYYTPPLINIIKFACNACHEKRVFVTDGCRGCLAHPCVEVCPKGAVTLERTNGRSVIDQDKCIKCGRCADVCSYHAIIVQERPCAAACGMDAIHTDANGKADIDYEKCVSCGMCLVNCPFGAIADKSQIFQVIRAIQTGERVYAAVAPAFVGQFGPKVTPGRLRAAMKELGFADVFEVAIGADICAVQEAEDFVNEVPEKLPFMATSCCPAWSTMAKKLFPKHANCVSMALTPMTLTARLIKNQNERAKVVFIGPCAAKKLEAMRSDIRSDVDFVLTFEEMAGIFDAKHIDIETIPEDPEGVNDAST…	[FeFe] Group B	[FeFe] Group B	Evolving	Labile	1	[FeFe]-centre, 2 x [4Fe4S] clusters	None	1.74098	1.71347	1.18357	3.34938	2.06137	0	2.42667	1.42485	1.479	2.9854	2.08728	0	0	3.72913
WP_004607263.1	MVNLTIDGKAISVEENTTIMEAAAANGIPIPKLCYLKGINEIAACRVCVVELEGKDRLITSCNNVAKDGMVIHTNSPKVRRHRRTTVEMILSQHDCECVTCPRSGNCSLQKVANDLNIFDNPYKSEIERQPWNKNFPLIRDSSKCIKCMRCVQVCDKIQGLSVWDVEGTGSRTTINVGGHRCIEEADCSLCGQCITHCPVGALRARDDTEKVWNAIANPDKIVIAQVAPAVRTAWSEGLNLDPEEATVGKILDALKRMGVDYAFDTAFSADLTIMEEATEFLKRFTSGELKDRPMFTSCCPGWVRFVKSQFPHMVKYLSTAKSPQQMFGAIMKTYFAEKIGVSPEQIYTVSVMPCVAKKDEREMELFYGEYAGHDVDAVITTRELIKMIRSAHISPDTL…	[FeFe] Group A2	[FeFe] Group A2	Evolving	Labile	2	[FeFe]-centre, 3 x [4Fe4S] clusters, 1 x [2Fe2S] cluster	NADH-dependent glutamate synthase	3.46708	3.34964	2.36715	4.46584	3.09206	1.65306	5.66224	3.56212	8.13451	2.9854	0	0	2.45195	6.52598
WP_005836589.1	MAFTSNIMIVRHRLLKELVKLWNNNELVDKIDRLPIELSPRRSKHAGRCCVHKERAVWKYKSLPLLGLDMEDETDELTPLSEYAARALDRAENGRPKDNIMCVIDEACSACVQINYEITNLCRGCTARSCQVNCPKKAVHVKESGQAWIDHDACISCGICHKSCPYHAIVYIPVPCEEACPVKAISKDEKGIEHIDESKCIYCGKCLNACPFGAIFEISQVFDVLHRIRKGEQVVAIVAPSILGQFKTTIEQVYGALKQVGFTDVIEVAQGAMDTVSNEAHELIEKLEEGQKFMTTSCCPSYIELVNKHIPAMKPYVSGTGSPMYYAARIAKEKYPDAKVVFIGPCVAKRKEAQRDEAVDFIMTFEEVASVLAGLDIQMEQAQPYSMSFTSVREAHGFA…	[FeFe] Group B	[FeFe] Group B	Evolving	Labile	1	[FeFe]-centre, 3 x [4Fe4S] clusters, 1 x [2Fe2S] cluster	None	7.6105	7.786	3.55072	7.81522	6.18412	11.5714	7.28002	9.26151	1.479	8.95619	8.34913	24.8411	1.22598	1.86457
WP_008902548.1	MVNLTIDGKKVSVPGQTTIMEAAESVGIHIPRLCYLKDLNEIAACRVCVVEVDGKDKLITSCNNVVLEGMEVKTNSKKVRSHRKTTVELLLSQHSNKCVSCARNQNCSLQDLTYDLNIREIPYEEHLEKQEWNNNFPLIRDSTRCIKCMRCIQVCDKMQSLNVWGLEGTGARTTVNVTGGRKIEDANCSLCGQCITHCPVGALSERDDTEKAWNALEDETKTVVVQVAPAVRASWAEQMGLSEEEAPVGKIFDALKKMGADYVFDTVFGADLTIMEEASEFLERFTAGDLKERPMFTSCCPGWVRFVKTEFPHMLSSLSTAKSPQQMFGAVMKSYFAEKIGKNPNDIVAISVMPCVAKKAEREMDMYYGEFAGHETDIVITTRELTRMIKSAHINVSNL…	[FeFe] Group A2	[FeFe] Group A2	Evolving	Labile	2	[FeFe]-centre, 3 x [4Fe4S] clusters, 1 x [2Fe2S] cluster	NADH-dependent glutamate synthase	1.29775	1.22924	2.36715	0	1.03069	0.826529	0	3.56212	3.6975	0	0	0	3.67793	0
WP_012414920.1	MIKFDTKVQLLKYKVLKEVAKYAFEDKLLENMMKIPENIIPGKNATMRCCVYKERAIVSERVKIAIGGDKRRANIVEVINIACDECPVGGYEVTAACRGCIAHRCEQVCPKNAISFDHEQKAHIDKTKCVECGLCAKVCPFSAILSYKRPCEKACKVVNAISMNSTKEAKIDDKKCVSCGACINQCPFGAIMDKSFILDVIDLIKKSENNTKYKLYAVVAPSISSQFSGYKLGQVITGLKKLGFYHVVEAALGADMVAMKESSELEEKGFLTSSCCPAFVSYIKKNFPDLEKDISHNFSPMAEISKYIKETTPGAKVVFIGPCTAKKMEAHLDNVRPYVDNVITFEELQALFGSKDIDLGALEEGVLDNASYYGRIFARSGGLSDAVAQAFKEKGSSFA…	[FeFe] Group B	[FeFe] Group B	Evolving	Labile	1	[FeFe]-centre, 3 x [4Fe4S] clusters, 1 x [2Fe2S] cluster	None	1.64697	1.69281	3.55072	0	0	2.47959	2.42667	1.42485	1.479	0.995132	3.13092	1.46124	1.22598	1.86457
WP_014184511.1	MPSHSMITGSIVTDEDQCQGCNKCVRECPVHANIVYVNHDKVKAKINYERCIECGRCIENCDHNARSFVDDTAAFFHRLNSGHKITVLAAPSIRVNFPDYKKLFGFLIAKGVNVIYDVSFGADITTWAYLKSIKEKELKPLIAQPCPAVVNYIEKFKPELLEQLSPIHSPMLCTAVYVRKYLNDNSELAMLSPCIAKRGEFISTQSLISYNITYQRLKEYLDNHKVELSNNKEVDFSDIACSLGCLFSRPGGLKENVEALVPNAWVRQIEGTELAYSYLNHYDDRVRHNKPVPLLVDILNCQHGCNIGTASIITDEALDDVDNMFNKLKIEKAQEKEKSGFAKTKKRMEFLQNYFDKVLNVKDFQRVYDHSRKAQELREPSELEYNEIFCSMYKEDEAS…	[FeFe] Group C	[FeFe] Group C2	Sensory	Labile	1	[FeFe]-centre, 2 x [4Fe4S] clusters, PAS domain	Fusion with methyl-accepting chemotaxis protein	7.99123	8.56501	7.10145	5.5823	6.18412	9.91835	11.3245	7.83666	2.958	6.96593	6.26185	16.0737	9.8078	9.32283
WP_015358633.1	MSEMVTLTIDGVEVKAPAGSTVLEAAKLAGIRIPTLCYLKGINEIGACRICVVDVGARSLQAACVYPVSEGLKVVTNSPKVREARKVTLELILSNHERTCLTCVRSGNCELQQLANELNVGEIRFDGERTDLPVDDLSPSVVRDPNKCVLCRRCISVCNNVQSVAAIGTAERGFKTVIASPFNMALKDTPCVNCGQCINVCPVGALREKSSIEKVWDALANPDLHVVVQTAPAVRVAIGEEFGLPIGTRCTGKMVAALKRLGFDKVFDTDTGADLTIMEEGNELIQRIKNGGKLPMITSCSPGWIKFCEHNYPDLLDNLSTCKSPQNMFGALLKSYYAEKMGIDPSKIFVVSVMPCTAKKFEIQRPELASTGYPDVDVSITTRELARMIKEAGIDFVNL…	[FeFe] Group A3	[FeFe] Group A3	Bifurcating	Labile	4	[FeFe]-centre, 3 x [4Fe4S] clusters, 1 x [2Fe2S] cluster	NADH dehydrogenase, thioredoxin, thioredoxin	2.48186	2.33859	1.18357	1.11646	4.12275	2.47959	2.42667	3.56212	3.6975	2.9854	0	1.46124	1.22598	4.66141
WP_020074005.1	MVTVTINHKVYEVEEDSTILDAAASVGIHIPTLCYLKGINEIGACRVCVVELAGKDKLVASCNNRVQEGMVMYTNSPRVREARRGIVELILSQHDCYCSTCVRSGNCGLQRIANDLGILDPPYQRELPVSEWNKRFPLIRDFSKCIKCMRCIQVCDEIQGMHIWDVANTGSRTTVDVTWNRKIEDSDCALCGQCITHCPVGALRERDDTEKAFAALADPDKITVVQIAPSVRAAWGEPFGLPREQATVKRLVAALRRMGFRYIFDTNFAADLTIMEEGSELLEKLGRPEAARFPMFTSCCPGWVRFLKSQYPDMVGNLSSAKSPQQMFGAVAKSYYAELLNVDPKRIYSISVMPCLAKKDECAQKVLNDAGAGQDVDLVLTTREIDRMIRAEHVLVSEL…	[FeFe] Group A2	[FeFe] Group A2	Evolving	Labile	2	[FeFe]-centre, 3 x [4Fe4S] clusters, 1 x [2Fe2S] cluster	NADH-dependent glutamate synthase	5.24191	4.88354	3.55072	5.5823	5.15343	6.61223	4.85335	5.69939	12.5715	3.98053	4.17457	1.46124	2.45195	4.66141
WP_007862856.1	MDKFYHSVRLDESLCKGCINCIKRCPTEAIRVRGGKASINNKFCIDCGECIRVCPHHAKHATYDKMDVMKQYEYTVALPAPSLYSQFNNLDDVNIVLNALVRMGFDDVFEVSAAAELVSEATRQYISDHEEQLPFISTACPSVVRLIRVRFPNLIPHLLPLNPPVEVAAILAAEKAMKDTGLPREKIGIMFISPCPSKVTYVKAPLGTEKSQVDHVLAIKDVYPKLLACMKAVVAEDYPVIGTSGKIGISWGHSGGEASGLFTENYLAADGIENVIRVLEDMEDQKFTNLRFVELNACNGGCVGGVLTVENPYVAEVKLKRLRKYMPVARSHMHDSEERLIKWTTGVEYEPVFNLGNNMMESFSRLNQVERLMKKFPGLDCGSCGAPTCKALAEDIVRG…	[FeFe] Group C	[FeFe] Group C1	Sensory	Labile	2	[FeFe]-centre, 2 x [4Fe4S] clusters, PAS domain	Histidine kinase	6.96203	6.63212	13.0193	8.93168	5.15343	3.30612	5.66224	5.69939	8.87401	1.99026	10.4364	0	11.0338	7.45826
WP_007863166.1	MVTNDATILRLKHDVLYEVAKAAWEGNLEEKRGEIPYTMIPGPQATYRCCIYKEREIIKQRVRLAEGKCPAGKDTSNVVQVINAACEECPIASYIVTDNCRKCMGKACQNSCNFGAISMGRERAYIEPTKCKECGKCSQACPYNAIAHLERPCKKICPVDAITYDEYGICVIDEKKCIQCGACIHSCPFGAIGSKTFMVDVIRLIKAGKRVVAMVAPATEGQFGPDVTMASWRIALKQLGFADMVEVGLGGDMTAAYEAEEWAEAHKEGKKMTTSCCPAFVNMIKQHFPMLLENMSTTVSPMCAVSRMIKSQDPESITVFIGPCIAKKSESLDLNVKGNADYAMTFGEIRAMMRAKGVELQPAENDYQESSVFGKRFGNGGGVTAAVLQCLKEMDENTD…	[FeFe] Group B	[FeFe] Group B	Evolving	Labile	1	[FeFe]-centre, 3 x [4Fe4S] clusters, 1 x [2Fe2S] cluster	None	4.90032	4.94542	7.10145	3.34938	6.18412	0.826529	10.5156	1.42485	5.17651	1.99026	4.17457	1.46124	15.9377	0.932283
WP_013273994.1	MGIIDFKATKCKHCYKCIRNCEVKAVMIKDERAEIMPDKCVLCGKCMQVCPQSAKTLISDLDLVKGYIEAGIPTVISLAPSYMGLLTYKTIGQVNGALRKLGFADVRETSEGAAVVTAEYSRLLMEGEMENIITTCCPSVNDLIEIYYPQLIPHMAPVVSPMIAHGKMIKEELGTEVKVVFLGPCIAKKKEAGDPRHDGYIDAVLNFNDISRWLSEEEITIEDCEDIPFTNKNPRVNRLYPVTNGVVNSVLATEEGRDGYRKFYVHGCRNCIDLCESMMRGGIKGCFIEMNMCSGGCIKGPTVEDESVSRFKIKLDMEDAIEKEPVPWEELDPVMERISFGKRFLDRSPRDVLPTEAQIQQILKLTGKIRPEDELNCGACGYSTCREKAIAVFQKKAEL…	[FeFe] Group C	[FeFe] Group C3	Sensory	Labile	3	[FeFe]-centre, 2 x [4Fe4S] clusters, PAS domain	Phosphatase, thioredoxin	3.38082	3.22089	4.7343	2.23292	7.21481	0.826529	2.42667	2.8497	5.91601	1.99026	3.13092	0	7.35585	0.932283
WP_000107363.1	MSTQYETQGYTINNAGRRLVVDPITRIEGHMRCEVNINDQNVITNAVSCGTMFRGLEIILQGRDPRDAWAFVERICGVCTGVHALASVYAIEDAIGIKVPDNANIIRNIMLATLWCHDHLVHFYQLAGMDWIDVLDALKADPRKTSELAQSLSSWPKSSPGYFFDVQNRLKKFVEGGQLGIFRNGYWGHPQYKLPPEANLMGFAHYLEALDFQREIVKIHAVFGGKNPHPNWIVGGMPCAINIDESGAVGAVNMERLNLVQSIITRTADFINNVMIPDALAIGQFNKPWSEIGTGLSDKCVLSYGAFPDIANDFGEKSLLMPGGAVINGDFKNVLPVDLVDPQQVQEFVDHAWYRYPNDQVGRHPFDGITDPWYNPGDVKGSDTNIQQLNEQERYSWIK…	[NiFe] Group 1d	[NiFe] Group 1d	Aerobic Uptake	Tolerant	3	[NiFe]-centre, 1 x [4Fe3S] cluster, 1 x [3Fe4S] cluster, 1 x [4Fe4S] cluster	Cytochrome b	0	0.165855	0	0	0	0	0	0	0	0.995132	0	0	0	0
WP_000107397.1	MSTQYETQGYTINNAGRRLVVDPITRIEGHMRCEVNINDQNVITNAVSCGTMFRGLEIILQGRDPRDAWAFVERICGVCTGVHALASVYAIEDAIGIKVPDNANIIRNIMLATLWCHDHLVHFYQLAGMDWIDVLDALKADPRKTSELAQSLSSWPKSSPGYFFDVQNRLKKFVEGGQLGIFRNGYWGHPQYKLPPEANLMGFAHYLEALDFQREIVKIHAVFGGKNPHPNWIVGGMPCAINIDESGAVGAVNMERLNLVQSIITRTADFINNVMIPDALAIGQFNKPWSEIGTGLSDKCVLSYGAFPDIANDFSEKSLLMPGGAVINGDFNNVLPVDLVDPQQVQEFVDHAWYRYPNDQVGRHPFDGITDPWYNPGDVKGSDTNIQQLNEQERYSWIK…	[NiFe] Group 1d	[NiFe] Group 1d	Aerobic Uptake	Tolerant	3	[NiFe]-centre, 1 x [4Fe3S] cluster, 1 x [3Fe4S] cluster, 1 x [4Fe4S] cluster	Cytochrome b	0	0.165855	0	0	0	0	0	0	0	0.995132	0	0	0	0
WP_002568591.1	MIHVTINGKPVEVSEGSTIMEAAETVGIRIPSLCHMKNVHQYGSCRICVVEVEGMKNLQASCMAKVREGMVIRTHSPKVLAARKVLYELLLSNHPKDCLNCSRNTNCELQELGYELGVSESRFEGAMTKPMVDISPSITRDTSKCVLCRRCVTVCTQIQKVGAIQAQNRGFDTVVSPAMGLPLNSTACAMCGQCTVVCPTGALKETDGLAPVWRALADPEKRVVVQVAPAVRAALGEEFGLPVGTPVTGKMATALHEIGFDDVFDTLFSADLTILEEGTELLGRLNAALKGDESQKEKAVLPMITSCSPGWIKHIEHQFPEELDHLSTCKSPHTMLGAVVKSFYAERTATAPENMFVVSVMPCTAKKYEIQRPEMEVDGNRDVDAVLTTRELARMIKTA…	[FeFe] Group A3	[FeFe] Group A3	Bifurcating	Labile	3	[FeFe]-centre, 3 x [4Fe4S] clusters, 1 x [2Fe2S] cluster	NADH dehydrogenase, thioredoxin	0.290518	0.50152	0	0	1.03069	0	0	0.712424	0.739501	0	1.04364	0	1.22598	0
WP_002568890.1	MGMEIIDFKATKCKHCYKCVRYCGVKAIQVKDERAVIMPDKCILCGHCLKICPQSAKTLKSDLNMVRGFLREGMRVVVSIAPSYMGLLKYKTIGQVRGALLRLGFEDVRETSEGAAFVTAEYTKLLAEHKMENIITTCCPSANDLVEIYYPQLIPCLAPVVSPMIAHGKLLKEELGCDVKVVFLGPCIAKKKEAMDLRHEGYIDAVLNFNDINKWLEEEDIVIGDCEDRPFTAFDPKVNRLYPVTNGVVNSVLATEEKGDGYRKFYVHGEDNCIDLCKSMSRGEIKGCFIEMNMCSGGCIKGPTVDEEFISRFKVKLDMEESICREPAEETQMEPVWENVNFRKQFEDHSPRDPQPTEEQIREILRMTNKLKPEDELNCGACGYPTCREKAIAVFQHKA…	[FeFe] Group C	[FeFe] Group C3	Sensory	Labile	3	[FeFe]-centre, 2 x [4Fe4S] clusters, PAS domain	Phosphatase, thioredoxin	0.989857	0.892005	2.36715	1.11646	1.03069	0	0	1.42485	0	0.995132	3.13092	0	1.22598	0
WP_002570913.1	MGFMTIDRIRVEFTDEPNVLSVIRKADIDIPTLCYHSELSIYGACRLCTVENERGKTFASCSEPPRDGMVIYTNTPRLMKYRKMILELLLAAHCRDCTTCIKSGECHLQELAHRMGVTHVGYENTKTQYPIDMSSPAIVRDPNKCILCGDCVRMCDNVQSVNAIDFAYRGTEALVTPAFNKNIAETDCVNCGQCRAVCPTGAISINTNIEVIWEALADPNTKVVAQVAPAVRVAVGDFFGMARGENVMGKIVNVLHRMGFDEVFDTAYGADLTVIEESKEFLERLVSGKNLPLFTSCCPAWVSFCENRYPEFKQNLSTCRSPQQMFGAVIQEYYRNPQKSGGKKLLSVSIMPCTAKKAEILQEESKTNGKADVDYVLTTTELVTMIRKSGIRFENIDIE…	[FeFe] Group A3	[FeFe] Group A3	Bifurcating	Labile	3	[FeFe]-centre, 3 x [4Fe4S] clusters, 1 x [2Fe2S] cluster	NADH dehydrogenase, thioredoxin	0	0.37827	0	0	0	0	0	0	0	0	1.04364	0	1.22598	0
WP_002572006.1	MDKFYHSVRLDESLCKGCINCIKRCPTEAIRVRGGKASINNKFCIDCGECIRVCPHHAKLATYDKLDVMKKYKYTVALPAPSLYSQFNNLDDVNIVLNALLLMGFDDVFEVSAAAELVSEATRQYISEHEEQLPLISTACPSVVRLIRVRFPNLIPHLLPINPPVEVAAVLAVRKAMEDTGLPREEIGIMFISPCPSKVTYVKSPLGTEKSEIDQVLAIKDVYPKLLACMKTVVGEDYSVIGTSGKIGISWGHSGGEASGLFTENYLAADGIENVIRVLEDMEDQKFTNLRFVELNACNGGCVGGVLTVENPYVAEVKLKRLRKYMPVARSHMHESEENVIKWTTGVQYEPVFRLGNNMMESFSRLNQVERLMKKFPGLDCGSCGAPTCKALAEDIVRG…	[FeFe] Group C	[FeFe] Group C1	Sensory	Labile	2	[FeFe]-centre, 2 x [4Fe4S] clusters, PAS domain	Histidine kinase	0.492673	0.17394	0	1.11646	1.03069	0	0.808891	0	0	0	1.04364	0	0	0
WP_002580338.1	MGKYMIIDGNRVEFDEEKNILDLVRKAGIDLPTFCYYSELSIYGACRMCAVEDEKGRIIFSCSSPPKDKMVIKTNTPKLYVHRKMILELILASHCRDCTVCRKSGKCRLQELALRFGVDKIRFKNTKKKLPIDNSSNAIVIDSSKCILCGDCVRMCSEVQNVGAIDFAFRGSNMMVSPAFGKNLSETNCVSCGQCSAVCPTGAITIKSCVKDVWKAIYEKDKRVVMQIAPAVRVALGEEFKIKSGENVMDKIVAVMRRLGVDEIYDTSVGADLTTLEESKEFLEKLKCESGCISINNDLKHKDLDVVDCHNKNIKKEFFENRRNIRYPLFTSCCPAWYRYAETKHPELMPHISSCKSPMEMFGVVIKEYFKERDLKEGRETISVAVMPCTAKKAEADRE…	[FeFe] Group A3	[FeFe] Group A3	Bifurcating	Labile	3	[FeFe]-centre, 3 x [4Fe4S] clusters, 1 x [2Fe2S] cluster	NADH dehydrogenase, thioredoxin	0.323832	0.165855	0	1.11646	0	0.826529	0	0	0	0.995132	0	0	0	0
WP_002846126.1	MVNLIIDNVEVEVKEGTSIMDAAKFAGVDIPRLCFLKDLNEIGACRICIVELEGTNKLITSCNNKVEDGMVIRTNSPRVRKARRTNIEFILANHDFKCATCVRSGNCSLQDMANSMSIFNMPFEVKYEKKAWNKDFPLQKSFEKCIKCMRCIQVCNKVQSLGIWDVVNSGYRTSVDVSWNRTIEQTDCSLCGQCITHCPVGALTVRNDIDKVYRAMEDPSIVTVVQVAPAVRTAWAERLNIDEKDASTNLMVAALKKIGFDYVFDTNFSADLTIMEEATEFLNKFTAGPMEFPMFTSCCPGWVRFIKSQYPDLVKYLSTAKSPQQMFGTIAKTYYAKLLNINPKKIFCVSIMPCTAKKHEADIPSINDSEAPKDVDVVITTRGLEKMIRSENIKFDMLE…	[FeFe] Group A2	[FeFe] Group A2	Evolving	Labile	2	[FeFe]-centre, 3 x [4Fe4S] clusters, 1 x [2Fe2S] cluster	NADH-dependent glutamate synthase	0.388368	0	0	0	0	0	1.61778	0.712424	0	0	0	0	0	0
WP_002848484.1	MSELLIVRPDKCVGCNACVRSCPAPEANITKIIDGGRFITMVNNDRCIGCGECVKNCNHGARDYIDDTDECMSRMKKEKMIILATPAIKAVFPTKWKGILDWFRKQGCMIYDGSFGADICSWAHLRAIEQKKVGNVITQPCASIVKYVETYQPKLLANLSPIHSPTLCSATYIKKYLNRNNPIAALTSCIAKKYEFEETGLVDYNVTFKKLGEYFEKNGISIPVSNTDDYEYRFDDQQGQVGAVYSRPGGLRDNLWLHNPDINITTSEGVGKVYRELDMYAEMPDFKHPEVFDVLSCEFGCNIGPGAGANQTMFDVMVTMKEVENEAKSRRKSGFMGRGDDRLFKKFDDELKLNDFLRNYKPVTPTPVPTERQLENVYESMGKIEEDDKHFDCRACGYR…	[FeFe] Group C	[FeFe] Group C2	Sensory	Labile	1	[FeFe]-centre, 2 x [4Fe4S] clusters, PAS domain	Fusion with methyl-accepting chemotaxis protein	1.29453	0.2465	0	0	1.03069	1.65306	0.808891	4.27454	1.479	0	0	0	0	0
WP_002956442.1	MTKRIIVDPITRIEGHLRIEVIVDENNVIQDAFSSSTLWRGLETIVKNRDPRDAGFLVQRICGVCTYSHYKAGIVAVEDALGIKPPLNAILTRTLMNISLFLHDHAVHFYTLHGLDWCDITSALQADCAKAAKLAFKYTKNPLCAGEADLKVVQEKVSAFVKQGALGPFANAYWGHKTYRFSPEQNLIVLSHYLKLLEVQRVIAQMMAIFGAKNPHPQSLTVGGVTSVMDILDPSRLGEWLTKHLEVVDFVNRAYWADIIMAAEAYKNEDSVLKGCGVKNFISFQEMQVGAEEWLFSSGIVKNGDLSKVYPIDESKITEEATHSWYEDNEPLHPYDGKTNPHYTGFRDAQTIGADGKLVDSKILDESGKYSWIKSPRYDGEPMEVGPLASVVVGYASGN…	[NiFe] Group 1b	[NiFe] Group 1b	Anaerobic Uptake	Sensitive	3	[NiFe]-centre, 2 x [4Fe4S] clusters, 1 x [3Fe4S] cluster	Cytochrome	0.171781	1.36262	0	0	1.03069	0	0	0	0	0.995132	0	4.38373	0	2.79685
WP_003148188.1	MPGTMRGVYTNLTEIRRKVFREVSKLAYESGEKPLEEVAHKMEHLPYTIVPGEIATYRESVFLERAVAGERVRMTMGMPMQGVDHPEQLSEGIEKAAIPEVYYQPPLINIIKFACNACEDNVFRVSNACQGCLAHPCREICPKGAISFVDKKAFIDQEKCIKCGMCEKVCPYHAILHHLRPCAEACGMHAIGSDEHGRADIDYEKCVSCGQCLVNCPFGAIADKSQIFQVITAINQGNEVIATVAPSFVGQFGKGGVGKLREAFKQLGFASLEEVATGADMCTVQEAEDFLDEVPEKLPFMGTSCCPSWSAMAKMEFPDNADAISMALTPMVLSARLIRKNHPKAKIVFVGPCSAKKLEAMRRSVKSEVDFVLTFEELAGMMEAKGIAFESLADDKSDF…	[FeFe] Group B	[FeFe] Group B	Evolving	Labile	1	[FeFe]-centre, 2 x [4Fe4S] clusters	None	0.134815	0	0	0	0	0	0.808891	0	0	0	0	0	0	0
WP_003493654.1	MNYIDISGLNCKNCYKCLRACPVKAIKFKNEKAEIVEERCISCGRCLVICPQNAKKDKPDIKHVKEAIRSGKKVVASVSSVFAGVFNVEEGKIVSALKELGVSYVEETALGGEIVTELYKDYVETTKLNNYITTSCPSAVNLIEKYFPSLIKYMIPIASSMTAHGKILKEIWGKDAFVVFIGPCIAKKTESDIYKKEKVVDAVINFDELKNWFKEMNIDLNSMPIGEFDRNAYKKTRSFTLSGGIINSMGNIIENNNLISMSVSGVEESIQVLKSMEIGEISNTFLEITACRGNCIGGPNMIKNEVSYYTRLNKVKNYIKNRDTSNTIRLLSVPDSIDFSTSFKDRHFEKKKASRKDLLKIMKSMGKHTKEDELNCGVCGYNTCIEKAQAIYEGMAETN…	[FeFe] Group C	[FeFe] Group C3	Sensory	Labile	2	[FeFe]-centre, 2 x [4Fe4S] clusters, PAS domain	Phosphatase	0	0.204329	0	0	0	0	0	0	0	0	0	0	1.22598	0
WP_003493657.1	MDYINFKKANCKNCYKCLRSCPVKAIKFNNHQAKIEMERCILCSRCVLVCPQNARKVVNYLDKVKKALNKKEKIVASIAPSFMGNFNVSHGKIVASLKSLGIKYAEETALGADITTKLYKSFIKENKQDYYITTACPSVNLLVEKYYPELVKYMLPFMSPMTCHGKILKTIYGEDSFTLFIGPCTAKKAEHENYNFENSIDAVLTYEEYLNLLKEYNICIENLESMEFDNKSLKLGSYYPMPGGIISNLKDELKDKNIKSFYVDGVYACMDIFESIKKGHIKNSFIEASACVGSCIGGPEVITNNHEYYNKLEKVQNYIENRQNYIKSYENKADKQNNLESSKLNFHRGFVDKSIDKEIQYEEQIKNILKSMGKYSKEDELNCGVCGYNTCIDKANAIL…	[FeFe] Group C	[FeFe] Group C3	Sensory	Labile	2	[FeFe]-centre, 2 x [4Fe4S] clusters, PAS domain	Phosphatase	0.547011	0.401881	0	0	1.03069	0.826529	0	1.42485	1.479	0	0	0	0	0.932283
WP_003507891.1	MRIIDFKESKCMHCYKCVRYCDVKAVMIKDGRAEVIEDKCVLCGHCLHVCPQSAKTMASDLDTVKYYIRQGHRVVASLAPAYMGFLQEGTIGQIHEAFRKLGFFDVRETAEGAAAVTGEYAKLLEDGKMENIITTCCPSVNDLIEIYYPRLVPYMAPVVSPMVAHGRMLKKEYGEDVKVVFVGPCIAKKKESTDPRNFDSIDAVLNFNDIRKWMESERISIEDCGDVPFERLEPQVNQLYPVTGGIIHSVLSTKEQKDGYRKLHIHGTKNCIEFCDSLMAGEISGSFIEMNMCTGACINGSAPLDRTVSRFRVKIDMEEKVSREPADRVKLQKMSEGVGLGKQYSDHSTNDLMPTEEQIREILAKTGKRTPEEELNCGACGYSTCREKAVAVFQKKAEI…	[FeFe] Group C	[FeFe] Group C3	Sensory	Labile	3	[FeFe]-centre, 2 x [4Fe4S] clusters, PAS domain	Phosphatase, thioredoxin	0.503859	0.875401	1.18357	0	1.03069	0	0.808891	0	2.2185	1.99026	1.04364	0	0	0
WP_003512576.1	MSPYFHSVTLDEVKCKGCTNCIKRCPTEAIRVRKSKARIINERCIDCGECIRVCPYHAKKAITDPIGLINDYKYKVAIPAPSLYGQLKSAPSRDHILTALKMCGFDDVFEVARAAEIITSETKKILAQQRFEKPLISSACPAVVRLIQVRFPNLIDNILKLKSPMEVAAKIAKDEISRNRKIRQEDIGVFFITPCAAKVTSIKAPLDKEKSFVDGAISISEIYLKILSALGKIDKPEKLSRAGFVGVRWANSGGESIALGTDKFLAVDGIHNVIAILEEIEDEKLEDIDFVEALACQGGCLGGPLNVENMYVARKTIKKFIDDAKEKGLETAADENCNYDIAWTGKVEYKPVMKLDKDFDVAMKKLETLNVINSGLPGLDCGACGAPSCRALAEDIVRG…	[FeFe] Group C	[FeFe] Group C1	Sensory	Labile	2	[FeFe]-centre, 2 x [4Fe4S] clusters, PAS domain	Histidine kinase	0.186077	0.45083	0	1.11646	0	0	0	0	1.479	0	0	0	1.22598	0
WP_003512584.1	MQMVNVTIDNCKIQVPANYTVLEAAKQANIDIPTLCFLKDINEVGACRMCVVEVKGARSLQAACVYPVSEGLEVYTQTPAVREARKVTLELILSNHEKKCLTCVRSENCELQRLAKDLNVKDIRFEGEMSNLPIDDLSPSVVRDPNKCVLCRRCVSMCKNVQTVGAIDVTERGFRTTVSTAFNKPLSEVPCVNCGQCINVCPVGALREKDDIDKVWEALANPELHVVVQTAPAVRVALGEEFGMPIGSRVTGKMVAALSRLGFKKVFDTDTAADLTIMEEGTELINRIKNGGKLPLITSCSPGWIKFCEHNYPEFLDNLSSCKSPHEMFGAVLKSYYAQKNGIDPSKVFVVSIMPCTAKKFEAQRPELSSTGYPDVDVVLTTRELARMIKEAGIDFNSL…	[FeFe] Group A3	[FeFe] Group A3	Bifurcating	Labile	4	[FeFe]-centre, 3 x [4Fe4S] clusters, 1 x [2Fe2S] cluster	NADH dehydrogenase, thioredoxin, thioredoxin	0.834154	0.525565	2.36715	1.11646	0	0	0.808891	0.712424	0	0.995132	0	0	1.22598	0.932283
WP_003514900.1	MKTLENHNRIKVTVNGREIEVYDNLTILQALLQEDIHIPHLCYDIRLERSNGNCGLCVVTLISPDGERDVKACQTPIKEGMVICTNTPKLENYRKIRLEQLLSDHNADCVAPCVMTCPANIDIQSYLRHVGNGDFEAAIRVIKERNPFPIVCGRVCPHTCESQCRRNLVDAPVAINYVKRFAADWDMARPEPWTPEKKPPTGKKIAIVGAGPSGLSAAYYSAIKGHDVTVFERQPHPGGMMRYGIPEYRLPKAILDKEIEMIKKLGVKIMTEKALGIHIRLEDLSKDFDAVYLAIGSWQATPMHIEGEKLDGVWAGINYLEQVAKNVDIPLGDNVVVIGGGNTAIDCARTALRKGAKSVKLVYRRTREEMPAAPYEVEEAIHEGVEMIFLMAPTKIIVK…	[FeFe] Group A1	[FeFe] Group A1	Evolving	Labile	1	[FeFe]-centre, 3 x [4Fe4S] clusters, 1 x [2Fe2S] cluster	None	0.26963	0.589392	0	0	0	0	1.61778	0	0.739501	0	0	0	0	2.79685
WP_003519061.1	MDNREYMLIDGIPVEINGEKNLLELIRKAGIKLPTFCYHSELSVYGACRMCMVENEWGGLDAACSTPPRAGMSIKTNTERLQKYRKMILELLLANHCRDCTTCNNNGKCKLQDLAMRYNISHIRFPNTASNPDVDDSSLCITRDRSKCILCGDCVRVCNEVQNVGAIDFAYRGSKMTISTVFDKPIFESNCVGCGQCALACPTGAIVVKDDTQKVWKEIYDKNTRVSVQIAPAVRVALGKELGLNDGENAIGKIVAALRRMGFDDIFDTSTGADLTVLEESAELLRRIREGKNDMPLFTSCCPAWVNYCEKFYPELLPHVSTCRSPMQMFASIIKEEYSTSSKRLVHVAVMPCTAKKFEAARKEFKVNGVPNVDYVLTTQELVRMIKESGIVFSELEPE…	[FeFe] Group A3	[FeFe] Group A3	Bifurcating	Labile	3	[FeFe]-centre, 3 x [4Fe4S] clusters, 1 x [2Fe2S] cluster	NADH dehydrogenase, thioredoxin	0.27551	0.165855	0	0	0	1.65306	0	0	0	0.995132	0	0	0	0
WP_003532170.1	MRNKAVSERKKPAFRSFFRSFFGKRIRKPFFWNNNRKGGMVMTPLRELYEEFVREKTKNASQSELDCLLHPRKYPVVWKVGDCSCDPGKTPECQASCLFNAIKIGSDGKLSINEDCVGCSACIDACQAKKLVASKDILPAMKAVLESDQMVYALVAPAFIGQFSPQVTPGMLRSAFRRIGFDGMVEVAIFADILTLKEALEFDRNIKTESDFQLTSCCCPMWIGMIRKIYHQLMPHVPGAVSPMIACGRTIKKLHPGAVTIFVGPCIAKKAEAREKDLQGAIDYVLTFEEMQDIFDALRIKPESMRDRKREHSSKAGRIYARTGGVSQAVQSTLEKLAPEKSMKIKTRQADGVPACKEMIDSLLEGRGGANFFEGMGCVGGCVGGPKRVINQELGRKTV…	[FeFe] Group B	[FeFe] Group B	Evolving	Labile	1	[FeFe]-centre, 2 x [4Fe4S] clusters	None	0.491027	0.2465	0	0	0	0	0.808891	2.13727	1.479	0	0	0	0	0
WP_004092218.1	MSQRITIDPITRIEGHLRIDCEIENGKVTKAWSSGTMWRGMEEIVKGNDPRDAWMIVQRICGVCTTIHAIASVRAVENAIGAEVPVNAQYIRNLIVAAHSIHDHIVHFYQLSALDWVDITAALNADPKKCEAMLKGVSSWSLNSSEEFAKVQQKIRDLVASGQLGIFANGYWGHKAMKLSPEVNLIAVAHYLQALECQRDANRVVAILGGKSPHIQNLAVGGVANPINLDAPSVLNLERLMYVKMFIERLGEFIEQVYKVDAAIIAANYPEWLSLGEGAKHYLSVPELPTDAKGGSFLMPGGYIENGDMSNYRPITSHQDKWLIDGIAESCKHSWYKDDAILKPWEGKTEPNYTGWQDEGKYSWVKSPTFYGKVVEVGPLADLLVKLAAKHPDTVKHFN…	[NiFe] Group 1c	[NiFe] Group 1c	Anaerobic Uptake	Sensitive	4	[NiFe]-centre, 2 x [4Fe4S] clusters, 1 x [3Fe4S] cluster	[FeS] protein, TM subunit	0	0.487081	0	0	0	0	0	0	0	0	0	2.92248	0	0
WP_004093662.1	MQTFKDLHRKIAEATAGGEPVKSLFDDFDKSELNCLFNPEIHPVFWSLEACLVKAAEAGKKISRDVQSCMESLHGKKKLAYALIAPAFIGQFSEEVTPGMLRNVFKQMGFDGMVEVAVFADILTLKEALEFDKNINTERDYQLTSCCCPMWIAMIRKIYSDLMPHVPATVSPMIAAGRTVKILQPGAVTVFVGPCVAKKAEAKEPDLQGAIDHVLTFQETKELFDLLNVDLTLFAANEKENSSRAGRIYARVGGVSEAVKNTVERLNPNRRIAIKTRQADGVVNCKAMINELMSGQVNANFFEGMGCIGGCVGGPKSIIDKEAAREQVNAYGEKALYPTPIDNPYVIELLHRLGFDTTESLIEDNQFFTRKF	[FeFe] Group B	[FeFe] Group B	Evolving	Labile	1	[FeFe]-centre, 2 x [4Fe4S] clusters	None	0.171781	0	0	0	1.03069	0	0	0	0	0	0	0	0	0
WP_004307174.1	MAFTNNIMIVRHKLLADLVRLWKNDELVEKIDRLPIELSPRKSKPLGRCCVHKERAVWRYKTFPLMGLDMTDEHDEVTPLSEYARLALSRSEPDKENIMCVIDEACSSCVQINYEITNLCRGCVARSCYMNCPKDAIRFKKNGQAMIDHDTCVSCGICHKSCPYHAIVYIPVPCEESCPVKAISKDEHGIEHIDESKCIYCGKCMNACPFGAIFEISQTFDVLQRIRKGEKMVAIIAPSILGQFKTSIGQVYGAFKEIGFTDVIEVAEGAMSTTSNEAHELLEKLEEGQKFMTTSCCPSYIELVEKHIPDMKPYVSTTGSPMYYAARIAKEKHPDAKVVFVGPCVAKRKEVRRDEAVDYILTFEEIGSILDGLGIELEQVQEFSVLHTSVREAHGFAQA…	[FeFe] Group B	[FeFe] Group B	Evolving	Labile	1	[FeFe]-centre, 3 x [4Fe4S] clusters, 1 x [2Fe2S] cluster	None	0.404446	1.36305	0	0	0	0	2.42667	0	3.6975	0	2.08728	1.46124	0	0.932283
WP_004602330.1	MITNDASLLDLKHKILEEVARLAWKDELNEEGKQKLVYELIPGPLAKYRCCVYKDRELVKQRIRLAEGKNPTPGNDSTNIVQILSPACEECPISSYSVTDNCRKCMGQACKNACKFDAISIGNHRSHIDPTKCRECGKCAQACPYNAIVHLERPCKKACPVGAITYNEYGICIIDEEKCINCGHCIHACPFGAPASKSNLPGIIADIKSDREVFAMCAPATEGQFGPDITMGSIRVACKELGFTDMVEVGLGGDMTAAYESEEWSEAKEAGKKMTTSCCPAFINMLRKHFPELYKNNMSSVVSPMCAISRYLKATHPGCITVFVGPCIAKKSEAADKELVAENADYVLTYGEFRAFLRSKDVELKPCEDRYQESSIFGKRFATSGGVAKAVIECMEERG…	[FeFe] Group B	[FeFe] Group B	Evolving	Labile	1	[FeFe]-centre, 3 x [4Fe4S] clusters, 1 x [2Fe2S] cluster	None	0.118737	0.36679	0	0	0	0	0	0.712424	0.739501	0	0	1.46124	0	0
WP_004608279.1	MFIYRQQGGRSLDKFIHSVKLDEDACIGCINCIKYCPTQAIRVHNGKAKITPEFCVDCGRCLRYCPHHAKIAIYDSIEEIRNYKYTVALPAPSLYTQFNNLTNVDIVLNALLSMGFDDVFEVSAAAELVSEASRAYISEHRDEAPFISTACPTIVRIIRVKYPTLIPRLLPLKPPVEVAAEIARKRAIEKTGLKSEDIGIFFISPCPSKVTYVKSPLGIEKSQIDKVLAIKEVYPILLEHMTHDESKLKPLAASGRIGIGWSNAGGESAGLITDNYLACDGIMSALRVLGDLEDEKFHGLKFVELNACNGGCVGGPLTVENPYVATAKSKKLHRYLPVAQTHASNFDDIDYHWNNFVEYEPVFRLGHSFRESLEMMGLIEELTEQLPGLDCGSCGAPTC…	[FeFe] Group C	[FeFe] Group C1	Sensory	Labile	2	[FeFe]-centre, 2 x [4Fe4S] clusters, PAS domain	Histidine kinase	1.06035	1.02781	1.18357	1.11646	0	0.826529	3.23556	0	0.739501	0	1.04364	4.38373	0	0
WP_004610503.1	MSKIKMKINNREVEAYEGQTVLEAAKNNGIHIPTLCYLKDVTGTGACRVCQVEIEGARTLCAACVYPVREGLVVKTNSQRALDARRRVVELIVSNHSKDCLSCIRNTNCELQRLCQELGVREDAFAGEKSSPTFDEVSPGIVRDTSKCVLCGRCVETCIKHQGLGILGFMNRGFKTKVGPVYDKSFADVNCMQCGQCINVCPVGALHEKEEVHDVIAALNDPTKHVIVQTAPAVRASLGEEFGMPIGTRVTGKMVHALKLMGFDKVYDTNFGADLTIMEEGHEFISRIQNNGVLPMITSCSPGWVNYIEHEYPELLDHLSSCKSPHMMLGAMLKSYYAKENNIDPKDIYVVSIMPCVAKKGEKEREENLTDGLKDVDSVLTTRELGKLIKMFGINFKDL…	[FeFe] Group A3	[FeFe] Group A3	Bifurcating	Labile	4	[FeFe]-centre, 3 x [4Fe4S] clusters, 1 x [2Fe2S] cluster	NADH dehydrogenase, thioredoxin, thioredoxin	0.472772	0.398921	1.18357	0	0	1.65306	0	0	0	0	0	1.46124	0	0.932283
WP_004611414.1	MKTFQQLYEDLLRQKVSVEEPLPKEYDPKHLDCLLYPEEYAPVISTDTCADCFERACQKSCIFDAIETGKEGELFINPSRCEGCAACIDACKSNHLAASKDVLPAMRAVRNASGPVYLMIAPAFSGQFRGHVTAGKLRSACKALGFTGMVEVALFADILTLKEALEFERHVREPGDFQLTSCCCPVWIAMIRKRYHELLPHVPGAVSPMVACGRFLKRIHPDAVTIFAGPCLAKKKEAKEPDIADAVDYVLTFQEMQDIFDAAEISLEELPEEEKEHASKAGRLYARTGGVSQAVEEMVRQLSPDGKIGVRCEQANGTKECMEMMRRIQNKETDANFFEGMGCVGGCVGGPKAIIDSEKGKRYVDEYAKNSIYQTPLENPYVRKLLEELGFETVEELLE…	[FeFe] Group B	[FeFe] Group B	Evolving	Labile	1	[FeFe]-centre, 2 x [4Fe4S] clusters	None	0.171781	0.204329	0	0	1.03069	0	0	0	0	0	0	0	1.22598	0
WP_004800637.1	MSLFEHEARQFKFDVLREVSKRAFNGKINEDTCDEIADLLIPGKKADYRCCIYKEKEIIRQRTRMALGKSPTPVENDNKAQIVRVIEAACDGCSINKIQVTDNCRKCMAKACVASCKFDAIHIGNERAYIDYDKCKECGACKNACPFNAIVETPRPCKLSCPVDAITIGENKLAYIDEEKCINCGACQAKCPFGAIEDISWMVNVIEELNKGTKMYAIFAPAIQGQFDNATLPQIIEGIRQLGFADAYEAAIGADAVAWYEKEDAKKHKKEGQKITTSCCPAFVNMAKIHFPTVYESNVSHMVSPMIATARYLKKMDPDCKLVFIGPCVAKKQEVQGSEVDYCITFEELGAMFVSKHIALEAVEAKEGIAASAHGRNFSIGGGVAKAVATALQENQDEP…	[FeFe] Group B	[FeFe] Group B	Evolving	Labile	1	[FeFe]-centre, 3 x [4Fe4S] clusters, 1 x [2Fe2S] cluster	None	0.134815	0.398921	0	0	0	0	0.808891	0	0	0	0	1.46124	0	0.932283
WP_004821125.1	MVNLTIDNVKIEVAEGTTIMQAAKSKGIEIPHLCYLKDLNEIAACRVCVVEVEGKGKLITACNNVVEEDMVIFTNSPKVMLDRMRTVQMILSQHDCKCATCVRSGNCSLQKLSNDLNIQDVLYEENLEHQAWDNSFPLIRDSKKCIKCMRCIQVCDKMQSLNIWELEGTGARTTVNISGSRTIAESDCSLCGQCITHCPVGALKERDDTSKLWEAIASEDKVVVVQVAPAVRTSWGEEIGLEIKEATVNKIFDALKKIGVDYVFDTAYSADLTIMEEANEFLDRFNNNELDERPMFTSCCPGWLRFIKGQFPHLVPQLSTAKSPMQMFGSVMKTYFAEKIGKKPENIYSVAVMPCLAKKGESEMELFYEEYAGHDTDCVITTRELVRMLRAAHINSNTL…	[FeFe] Group A2	[FeFe] Group A2	Evolving	Labile	2	[FeFe]-centre, 3 x [4Fe4S] clusters, 1 x [2Fe2S] cluster	NADH-dependent glutamate synthase	0	0.12325	0	0	0	0	0	0	0.739501	0	0	0	0	0
WP_004823125.1	MKETYQSIVDIRRKVFAEVARIAYYDVDISELEDSSYRIVPGEVAKYREDIFRERAVADERLRLAMGMDAREISVYKKLTDGFDKVDIDTNAYEKPLINVIKFACEACPTKAHVVTDNCRKCMAHPCTNVCPVNAVSVGRSRAHIDKEKCINCGRCKEACPYNAIVMYERPCAAVCGVDCISSDEYGRAEINHDNCVACGRCIASCPFGAIADKTQIYQLIKAIKSGKRIYAAVAPSFVGQFGANSSPAQIVEGIRQLGFEDVVEVSLGADVTTMNEAKEYIHRVPNDIPFMGTSCCFSWALMVKNKFPELSGQISDSGSPMRYTAEYIHEKDPEGIICFIGPCTSKKLEALDTKVKSHVDFVITFEELMGMFVAKGIEPSEIVIENDVKDASALGRGY…	[FeFe] Group B	[FeFe] Group B	Evolving	Labile	1	[FeFe]-centre, 2 x [4Fe4S] clusters	None	0.118737	0	0	0	0	0	0	0.712424	0	0	0	0	0	0
WP_004835820.1	MVNLRINNKEVEVDKGTTILEAAKKLNIKIPSLCHMDLHDIKFVNKLASCRVCLVEDLDKNNLVPSCATFVKEGMNIRTDSQRVIKVRRAIVELLLSDHPSDCLKCAKNLNCTLQDLAHDLNIREIRYKGEMRKLPIDDNSYSLIRDPNKCILCRRCETMCNEVQTVGALAEVGRGFYTHVGSSFNRSMFETTCTFCGQCLSVCPTGALTEKNNVAEVWKLLASDKHVIVQVAPAVRVSLAEMFGMEVGLNVEGKIVRALKTLGFSKVFDTNFAADLTIMEEANEFIHRLKGEGRLPILTSCCPAWVNFMEQQFSDMIDIPSSCKSPHEMFGAIAKSYYAKKEGIDPKDIVVVSVMPCISKKYEAKRDELENEGFSDVDTVITTRELAQMIKEVGIDFA…	[FeFe] Group A3	[FeFe] Group A3	Bifurcating	Labile	3	[FeFe]-centre, 3 x [4Fe4S] clusters, 1 x [2Fe2S] cluster	NADH dehydrogenase, thioredoxin	0	0.24354	0	0	0	0	0	0	0	0	0	1.46124	0	0
WP_004844038.1	MCVVEDDRGKIFASCSEVPRDGMVIYTHTPRLQHHRKMILELLLSSHCRDCTTCTENGVCTLQKLSRQLGIDEVRFENHKPILPLDESSECIVRDPNKCILCGDCVRTCEEIQGLGILDFAFRGSKMQVMPAFDRAMSQTDCVGCGQCRVVCPTGAISIKQDIAPVWTALADKDTRVIAQIAPAVRVAIGDKFGIPKGENTLGRLVAALRMIGFDEIYDTNFGADLTVMEESKELVERLESGENLPLFTSCCPAWVKFCENRYPQFRKNLSTCRSPQAMFGALLKEEARTEEKKAAQEGTKNRKTVVISIMPCTAKKAEIKRPEHFTEGKQDVDYVLTTTEVTRMIQEAGIDLSRIEPEALDMPFGLSSGAGAIFGVTGGVTEAVLRRLKNNSSSEVLD…	[FeFe] Group A3	[FeFe] Group A3	Bifurcating	Labile	3	[FeFe]-centre, 3 x [4Fe4S] clusters, 1 x [2Fe2S] cluster	NADH dehydrogenase, thioredoxin	0.404446	0.165855	0	0	0	0	2.42667	0	0	0.995132	0	0	0	0
WP_005020299.1	MSQRITIDPVTRIEGHLRIDCEIENGVVSKAWASGTMWRGMEEIVKNRDPRDAWMIVQRICGVCTTTHALSSVRAAESALNIDVPVNAQYIRNIILAAHTTHDHIVHFYQLSALDWVDITSALQADPTKASEMLKGVSTWHLNSPEEFTKVQNKIKDLVASGQLGIFANGYWGHPAMKLPPEVNLIAVAHYLQALECQRDANRVVALLGGKTPHIQNLAVGGVANPINLDSLGVLNLERLMYIKSFIDKLSDFVEQVYKVDTAVIAAFYPEWLTRGKGAVNYLSVPEFPTDSKNGSFLFPGGYIENADLSSYRPITSHSDEYLINGIQESAKHSWYKDEAPQAPWEGTTIPAYDGWSDDGKYSWVKSPTFYGKTVEVGPLANMLVKLAAGRESTQNKLN…	[NiFe] Group 1d	[NiFe] Group 1c	Anaerobic Uptake	Sensitive	4	[NiFe]-centre, 2 x [4Fe4S] clusters, 1 x [3Fe4S] cluster	[FeS] protein, TM subunit	0	0.165855	0	0	0	0	0	0	0	0.995132	0	0	0	0
WP_005033810.1	MTKKMINLTIDGTPIQVPAGTTVMKAAERLGIHLPRLCYHPNLSLEGACRVCVVQVKGFNHFLTACSQEVWEGMEVQTNSPEIRQARRDIVELLLDNHPKDCQTCDRDGNCELQRQAYRLGVRERLFEGRRKEYPTDESSKSVIRNPSKCILCGRCVRVCAEVQGVGNLSQHGRGFNTVVGPANLSNMDDSVCIQCGQCVAVCPTAAFLEQDHTERVWQALSMPRDVKHVVVQVAPAIRATLGETFDLPMGTPVTGKLITALRRLGFDTVFDTNFGADLTIVEEATEFLNRVTKGENLPLLTSCSPGWVSFLEKFYPEMIRYTSTCKSPMQMTSTLIKSYYAEKKGMDPRDIYVVAIMPCVAKKFEAARPEHSLPDGTPYTDAVLTTRELAWMIKSYGI…	[FeFe] Group A3	[FeFe] Group A3	Bifurcating	Labile	3	[FeFe]-centre, 3 x [4Fe4S] clusters, 1 x [2Fe2S] cluster	NADH dehydrogenase, thioredoxin	0.118737	0.15538	0	0	0	0	0	0.712424	0	0	0	0	0	0.932283
WP_005210163.1	MSYILPLGPYHPALEEPVHVKLLTEGEIIKDSEVFIGYNHRGIEKLTESRNYIQTITLVERVCGICSHSHAMTYCLAVENIAGMEVPKRGSYIRVIISELERLHSHYLWLGLAAHIIAFDSLFMMCFASREKIMDMLEVISGNRVNYAMNIVGGARRDITKEQKDTVLKMIEELRREYKNIYNVYAKDSSIAARTKGVGILTTDDALNYGACGPHGRASGVNFDVRKSMPYNCYEDFDFNVALANDGDVFSRAVIRLIEIEESCKIIEQALKNMPEGPINLGNKIPKVPAGEYIAVTEAPRGEVTYYVVSNGGQTNGRVNIHVPTFKNAMTVPVMLKNNTIADAGLIVASIDPCFSCLDR	[NiFe] Group 4d	[NiFe] Group 4g	Evolving	Sensitive	6	[NiFe]-centre, 1 x [4Fe4S] clusters	NuoL, NuoH, NuoC, [FeS] protein	0.37229	0.310761	0	0	0	0	0.808891	1.42485	0	0	0	0	0	1.86457
WP_005210787.1	MGEENEGSGKMFKFETQLKKLKHEVLTEVARLARVDGISLESIEKVPYEVIKGDIAQYRCCVYKERAIVLERAKLAAGYLANGDNADTDLIDIRPDEQIIYVIEAACDRCPINKFNVTDSCRNCLAHRCQEACNFGAITIVNGRAYINQELCKECGGCKRACPYDAISEVMRPCKRACPTGALDIREDDRRAMIKEELCVNCGSCMRACPFGAISDKSLIVPVAKRLGRNRKMYAVVAPAITGQFGPTMNYGKVRNAIKSLGFEDMIEAALGADAVTVHEANEFVERMERGDKYMTNSCCPGFLSFIEKTNQSEATKISGTVSPMVATARYIKKKDPEAKVVFIGPCTAKKGEAVRLGIADAVDYVLTFEELLALFEAFDVNPFECEEENVNDASVFGR…	[FeFe] Group B	[FeFe] Group B	Evolving	Labile	1	[FeFe]-centre, 3 x [4Fe4S] clusters, 1 x [2Fe2S] cluster	None	0.529062	0.572861	0	0	0	1.65306	0.808891	0.712424	0	0	1.04364	1.46124	0	0.932283
WP_005210847.1	MNSKHIDLFNTLIEAYYNGNFDETLNKIITCHEKSPQETFAIITSLCGVNIEFDNNYVYNLKKAITNYNVNKKIVEKLECSSANCQADKQSMYTCQKACPFNAIKFDAKNNTTFIDNDACIDCGLCVDSCKNGRILDKVEFIPIMDLIKNNKTVIAAVAPAIMGQFGDDVTMDQLRAAFIKIGFTDMIEVAFAADMLTVKEAVEFNKHVKSPNDLMITSCCCPMWVGMLKKVYKELLPNLSPSVSPMIAAGRVIKEINKDANVVFIGPCIAKKAEAKDKDIAGAIDFVLTFEEVNDIFKAFGFHPRDLEGIPTIEYTSKGGRLYARTGGVSLAVKEAVEELYPSNLKNFKAVQVEGVKQCKEILNLALKGEANASFIEGMGCIGGCVGGPKILVPPSQG…	[FeFe] Group B	[FeFe] Group B	Evolving	Labile	1	[FeFe]-centre, 2 x [4Fe4S] clusters	None	0.826044	0	1.18357	0	0	0.826529	0.808891	2.13727	0	0	0	0	0	0
WP_005351469.1	MLMNRTTPFMVPVDDANPAIIKNEALCSECGHCFAVCEEEIGVAAKYLLNQREAYQCIGCGQCSAVCPEKAITGRPHYKIVKELIQDPEKIVVFSTSPSVRVGFADGFGKEPGTFAQDEMVGALRALGADYVFDVTFSADLTIMEEGSELLSRILKGTGPLPQFTSCCPAWVKYMENFHPDKTKYLSSAKSPIGMQGAVIKTYFAHKKHIDPEKIISVAVTPCTAKKAEIAREELCDAGKLLNIEEMRDNDYVITTKELVQWCKEEGMDLGKITPSKYDSVLGEGTGAGMIFGNTGGVMEAALRTVYRVLEGKEAPADFYQLRPVRGLNNRKEAEVTIAGKNLKVCILYGTAAAEEFLAEDMSGYHFVEVMTCPGGCISGAGQPDCGSVPVSDAVRKKR…	[FeFe] Group A1	[FeFe] Group A1	Evolving	Labile	1	[FeFe]-centre, 2 x [4Fe4S] clusters	None	0.171781	0	0	0	1.03069	0	0	0	0	0	0	0	0	0
WP_005364906.1	MKENYTPLIQLRRMVFVEVARMGYDDNEKLAHNIEEAVYTILPGEVAQYRDSIYKERAIVGERLRMALGMKMRAQDEYSRLSDGCEKIIKSERIVQDELVQVMPFACEACPTKTYRVTNNCRKCLAHPCIQVCPVNAISMGQYSTIIDEEKCIRCGRCKDNCPYNAIVFFDRPCAAACGVNAIESDYLGRAIINQDKCVTCGMCLVHCPFGAIADKTEIFQLIQAIKNGEEVHAILAPAFVGQFGPLVKPDMIKEGIRRLGFKSVVEVALGADIESIHEAEEFLTEVPETLKFLGTSCCPSWYLAATKNFPEFKQNISSSATPMVATAKHIKEDHKNAKIAFIGPCVAKKTEASQPHLKHLINFVITFEELMGMLVARNIDFMSLKDAPPARDDASTSG…	[FeFe] Group B	[FeFe] Group B	Evolving	Labile	1	[FeFe]-centre, 2 x [4Fe4S] clusters	None	0.529639	0.776902	0	1.11646	2.06137	0	0	0	0	0	0	0	0	4.66141
WP_005384713.1	MIDGLLICYASNIGEIKTFTIGMIIQNEEVLMSQFEFIDKRVPIALDNPSIYHDISKCKNCTLCRRACADVMSVLDYYDLESTGDVPMCIHCGQCAAACPFDSMHARSELDKVKAAIADPDKIVVIQTAPAVRVAIGEGFGYEPGTFLEGKMVSALRKLGADYVVDTNFGADLTIMEEASELVDRLKNGGTIPQFTSCCPAWVRFAEIYFPELIPNLSSTRSCIAMEAAMIKTYFAEKKGINPANIVSVSVNPCTAKKAETKRVEENAAARYYDDESLGMDTDISITTREFIRWLNDEGVDFGSLEDSKFDDLIGMETGASIIFGNTGGVMEAAMRTAYKLITDKEPPPYALTHLEDVRGMNGVKEATVQLGDDVTLSVAVVHGGKNTRDFLNALKENG…	[FeFe] Group A1	[FeFe] Group A1	Evolving	Labile	1	[FeFe]-centre, 2 x [4Fe4S] clusters	None	0.316	0	1.18357	0	0	0	0	0.712424	0	0	0	0	0	0
WP_005384882.1	MFPKRFDSFSLLEEVLMSQYEFIDKRVPIALDNPSIYHDISKCKNCTLCRRACADVMSVLDYYDLDANGDVPVCIHCGQCAAACPFDSMHAKSELEKVKAALADPEKIVVIQTAPAVRVAIGEGFGYEPGTFLEGKMVGALRALGADYVVDTNFGADLTIMEEASELVERLKTGGQIPQFTSCCPAWVRFAEIYFPELIPNLSSTRSCIAMEAAMIKTYFAEKKGINPSNIVSVSVNPCTAKKAETKREEENAAARFYDDESLGMDTDISITTREFIRWIQEENLDFNAIEESQFDDLIGMETGASIIFGNTGGVMEAAMRTAYKLITDKEPPPYALTHLEDVRGMEGVKEATVQLGDDVTLSVAVVHGGKNTRDFLNALKDSDKHYDFIEVMACPGGC…	[FeFe] Group A1	[FeFe] Group A1	Evolving	Labile	1	[FeFe]-centre, 2 x [4Fe4S] clusters	None	0.27257	0.24354	0	0	0	0.826529	0.808891	0	0	0	0	1.46124	0	0
WP_005643305.1	METVKLIIDRKPVEVSKGTTILDAAKGMGIRIPTLCYMKLEDLHYENNPGACRICVVEIEGRRNLAPSCKTECMEGMVVQTHSPRVMNARKTVMELILSNHPAECLTCSSNGHCELQAIAHDLGIREIRYKGEMSIFQIDRSPSIVRNMNKCIMCRRCETMCNNIQTVGALTAVNRGFNAAVSTAFERDIAGSTCSYCGQCVSVCPVNALSGRNTQQPVLDALADPDKIVIAQTAPAVRTALGRDFGYEPGTLVTGKMVSALRRLGFDYVFDTDFAADLTIMEEGTELLQRIGKYLKGDQEVKMPLMTSCCPGWVSFVEQHFPELLDNLSTAKSPQQMFGAIAKSYFAEKLGVDRKRIVVVSIMPCLAKKYEASRPEFAVDGNPDVDISIYTRELARLI…	[FeFe] Group A3	[FeFe] Group A3	Bifurcating	Labile	3	[FeFe]-centre, 3 x [4Fe4S] clusters, 1 x [2Fe2S] cluster	NADH dehydrogenase, thioredoxin	0.137755	0.36679	0	0	0	0.826529	0	0	0.739501	0	0	1.46124	0	0
WP_005841395.1	MSTEATKMTNQEQEMVHLTINNIPLAVPKGTKIMQAAQKLGIDIPHLCYHEDQRIKARCRLCSVEVVGKRRLLAACSTEVWEGMEVHTDTQIVRDTQVAILQLMLANHHKDCLSCPRNQNCDLQRLCSRFNIQHSSLPSVCKEEPRIVTNPAIVRDPSKCIRCGRCIRACKDVQGIAALTYAGRSSDIVVTTAYNKPMETTDCILCGQCSLVCPTGALVEKDDTEKVLDALQDPKKHVIVQVAPSVRVSLGDAFGMEPGAIVTGQMVTALHLLGFDKVFDTNFGADLTIMEEGTEFLDRLQHGGVLPMMTSCCPGWVYYVEKHYSDCLPHLSSTKSPMSIFGAVAKTYYPKVAGIDVKDIVTVSVMPCTAKKFEAARPELGRDGRPDVDIVLTTRELIK…	[FeFe] Group A3	[FeFe] Group A3	Bifurcating	Labile	3	[FeFe]-centre, 3 x [4Fe4S] clusters, 1 x [2Fe2S] cluster	NADH dehydrogenase, thioredoxin	0.394525	0.17394	2.36715	0	0	0	0	0	0	0	1.04364	0	0	0
WP_006008218.1	MSQVMKTPQSNFSGPIVVDPLTRIEGHLRIEVEVENGRIKDARSCGTLYRGLEVILKGRDPRDAQHFTQRTCGVCTYTHALASTRALEDAMGLTLPANATYIRNLVLGLLFMHDHMVHFYHLHALDFVDVTAALKADPAKAAALASSISPRKATADDFKAVQARLKAFVDSGQLGPFTNAYFLGGHPAYYLDPEANLVATAHYLEALRVQVSAAKAMAVFGAKNPHPQFLIPGGVTCYESLTPERIKEFRDLYLQARKFIEEVYIPDLLLVAGAYKDWAALGCGCRNFMAFGEFPEVGGERDITKRWLKPGVLLDGKLDTVHPFDAGKIAEHVRHSWYEGEEARAPYDGETKPAFTRMGDTDRYSWLKAPRYDGLAMETGPLAQMLVSYAQGHEAVKPA…	[NiFe] Group 1b	[NiFe] Group 1b	Anaerobic Uptake	Sensitive	3	[NiFe]-centre, 2 x [4Fe4S] clusters, 1 x [3Fe4S] cluster	Cytochrome	0	0.642461	0	0	0	0	0	0	0	0	0	2.92248	0	0.932283
WP_006009278.1	MPATKTDNMLSSLRLGVIERLALSFWAGTLPEDVDRIPLLMRPRGSEIMSRCCIYKDRAILRERLRAAMGFRLEDETDDSIPLRTYAEEALERKEPNWPILTVCDIACQGCMRARYYVTDACQGCVARSCIGSCRFGAISFSRGRSTIDPEKCRNCGMCMDACPYHAIVRLNVPCEAACPVRAIHKGNKGRAEIDFEKCTSCGRCMRACPFGAVMERSEVLPVLRALASGRHVTALMAPAIVGQFSGGPARIVTALRRLGFSDVMEVALGADVTSQREAAEFVERMERGDTFMTTSCCPAYVEAVRRHAPELLPHVSETATPMHYTAEIARERHPETVTVFIGPCVAKRQEGLHDEMVDYVLTFEEVGALFNARGIVVEECEEHELERPSNEARGYAIA…	[FeFe] Group B	[FeFe] Group B	Evolving	Labile	1	[FeFe]-centre, 3 x [4Fe4S] clusters, 1 x [2Fe2S] cluster	None	0	0.17394	0	0	0	0	0	0	0	0	1.04364	0	0	0
WP_006059213.1	MTKINLKINNIPVQAEPGSTILEAARAAGIQIPTLCYLKDVNKTGACRVCTVEIKGAKSLGAACVYPVSEGMEVFTNSQRALEARKHTVELILSNHCGDCLSCIRNQNCELQKLAQQLGIRKVRYEGEKTPPTFDEVAPGIVRDTSKCVLCGRCIETCKKVQGLGILSFINRGFNTKVAPVFDKSFNDVNCMQCGQCVNACPVGALFEKEDIHRVIEALNDPEQHVVVQTAPAVRAALGEEFGLPIGTRVTGKMAAALRRIGFDRVYDTNYAADLTIMEEGHEFIERVQHQGVLPMITSCSPGWIRYCEFEYPDLLEHLSSCKSPHMMFGAILKSYYAQTHNLDPRKITVVSIMPCTAKKAEVVRPEMRKDGVADVDVVLTTRELGRLIKMYGINFENL…	[FeFe] Group A3	[FeFe] Group A3	Bifurcating	Labile	4	[FeFe]-centre, 3 x [4Fe4S] clusters, 1 x [2Fe2S] cluster	NADH dehydrogenase, thioredoxin, thioredoxin	0.442569	0.444486	0	1.11646	0	0.826529	0	0.712424	0.739501	0.995132	0	0	0	0.932283
WP_006235348.1	MVEPNNPTVSDNTESGALNMVKLTIDNCEVMVPEHTTILDAAKSAGIQIPTLCYLRDLNEIGGCRVCVVEVEGCDQLVAACNNYVLDGMVVHTNSPKAREARRTNVQLLLSQHDSRCTSCVRSGNCNLQTIANDLGIFYLPYEQHLAREGWDFDFPIIRDNDKCIKCMRCIKVCESVQGLGIWDLTNRATHTAVGTRGRAPIGKTDCVACGQCITHCPTGALRERDDTETVFDAIADPDKIVLVQIAPAVRSAWGEELGISREEATVERLACALRRVGFEYVFDTDFSADLTIMEEGSELLERLGKAAKGEGDSRGWPMFTSCCPGWVRFVKARYPEFVDRLSTSKSPQQMFGAIAKTYYAKVLGVEPERLFVVSVMPCTAKKAECALPSMMGEDGAPD…	[FeFe] Group A2	[FeFe] Group A2	Evolving	Labile	2	[FeFe]-centre, 3 x [4Fe4S] clusters, 1 x [2Fe2S] cluster	NADH-dependent glutamate synthase	0.413265	0	0	0	0	2.47959	0	0	0	0	0	0	0	0
WP_006299828.1	MISLNIDGKYVKVPEGSTILDAAKALGIEIPTLCHLDLHAVGLVNKGASCRICVVEVKGRRNLAPACATPAVEGMEVKTNTIRVLNARKTVLELLLSDHPKDCLTCAKSGNCELQEMAERFCLRENRYEGGLQSTYKKDHSPSLERDMDKCVMCRRCETMCNEVQTVGVLSGVNRGFTSVVAPAFEKPLEESVCTFCGQCAAVCPTGALVERDYSWQVIEALADPEKVVVVQTAPAVRAALGEEFGLEPGTLVTGKMAAALRALGFDHVFDTDFAADLTIMEEASEFLDRLTRHLNGDKDVRLPILTSCCPAWVKFFEHQFPDMLDVPSTAKSPQQMFGAIAKSYFAQKLGIPREKMVVVSIMPCLAKKYECSRPEFAENGNPDVDISISTRELAHLIK…	[FeFe] Group A3	[FeFe] Group A3	Bifurcating	Labile	4	[FeFe]-centre, 3 x [4Fe4S] clusters, 1 x [2Fe2S] cluster	NADH dehydrogenase, thioredoxin, thioredoxin	0	0.24354	0	0	0	0	0	0	0	0	0	1.46124	0	0
WP_006352873.1	MVAMQELNDIVEIKSQVLYETARHAFKGDLETSWFDIPYEMIKGGKPNFRCCVYRERAIIRQRVKMAMGKLPHDTDQENVDSDQIVYVISSACEGCPITKITVTQNCRGCLAKKCIKACPFGAISTSDGHAVIDKKKCRECGKCVAACPYNAIVDIERPCKNSCAVGAISMDENDVATIDPNKCINCGSCVTGCPFGAISDLSMMTDVIKVLNNKERKIYAMVAPAIEGQFGDVRLPEIKAAIKKLGFDGVYEVALGADIVAYNEAQELVERTQEGKKMTSSCCPAFVNLINKHYPELSENVSTTVSPMVAIERYIKANEPDAMVVFIGPCIAKKNEVVHLYQDEIEFALTFEELNAMLAAKEIKFEDVIPYDDKATRYGKGFAMSGGVSQAVGEVLRE…	[FeFe] Group B	[FeFe] Group B	Evolving	Labile	1	[FeFe]-centre, 3 x [4Fe4S] clusters, 1 x [2Fe2S] cluster	None	0.134815	0.412356	0	0	0	0	0.808891	0	1.479	0.995132	0	0	0	0
WP_006444067.1	MKYMTINNRKVAFEDEKNVLSVIRKSGIDLPTFCYHSELSTYGACRMCVVEDDRGRVFASCSETPREGMVIYTNTPRLQHHRKMILELLLASHCRDCTTCRKNGVCTLQKLAQQLGVSYVRFENNKPQLPLDESSDCIVRDPNKCILCGDCVRTCDEIQGLGVLDFAFRGARMQVMPAFNKDLAKTDCVGCGQCRAVCPTGAITIKQNIRPVWEAVADPDTRVVVQIAPAVRVAVGDKFGIPKGENSLGKLAAALRRMGFDEIYDTNFGADLTVMEESEELLERLDSGENLPLFTSCCPGWVKFCENKYPDLREHISTCRSPQQMFGAVLKEEARMDKEDKRKTVVVSIMPCTAKKAEIHRPEHRTDGEQDVDYVLTTTEVTRMIKEAGIDLAQMPSEA…	[FeFe] Group A3	[FeFe] Group A3	Bifurcating	Labile	3	[FeFe]-centre, 3 x [4Fe4S] clusters, 1 x [2Fe2S] cluster	NADH dehydrogenase, thioredoxin	1.40235	0	0	1.11646	0	0.826529	6.47113	0	0	0	0	0	0	0
WP_006524080.1	MQTGRVIIDGQAVEIAGAKNLLELVRRTGVELPTFCYHSELSVYGACRLCMVEVEKMGLVASCSTPPSEGMVIYTNTMRTKRLRKVILELLLANHDRECPTCVKSTTCKLQKLAKQYGVNKIRFGSRDVKLPIDDSSSSIVKDPNKCILCGDCVRMCKEIQGLGIWDFAFRGSKTQVTTAFGKELSEVDCINCGQCITVCPTGALTAKSEVEQAWKAILDPSKTVVFQIAPAVRVALGEEFGLSAGSAVTGKVVAALKKLGADKVFDTLFAADLTTIEESMEFISRLEKGDKLPLFTSCCPAWVKYCEQAHADLLANISSCRSPQQMFGSLVKKHYAQVIGKEPGEVVCVSVMPCTAKKFEATRPEFTTGGVRDVDIVLTTVELAQMIKEAGIVFNELE…	[FeFe] Group A3	[FeFe] Group A3	Bifurcating	Labile	3	[FeFe]-centre, 3 x [4Fe4S] clusters, 2 x [2Fe2S] cluster	NADH dehydrogenase, thioredoxin	0.134815	0	0	0	0	0	0.808891	0	0	0	0	0	0	0
WP_006567084.1	MCVVEDDRGRIFASCSETPRDKMVIYTNTPRLKHHRKMIIELLLASHCRDCTTCTKNGVCVLQKLSRQLGIKEVRFENNKKQLPKDLSSECIIRDPNKCILCGDCVRTCDEIQGMGILDFAFRGSKMQVTTAFNKDLAQTDCVGCGQCRAVCPTGAITIKQDIERVWDALSDPKIRVVVQIAPAVRVAVGDKFGIPKGENVLGRLVAALRRIGFDEVYDTNFGADLTVMEESKELVERLESGDNLPLFTSCCPAWVKFCENRYPQFRKKISTCRSPQEMFGALIKEEARMDEAGDSRKTVVVSIMPCTAKKAEITRPEHFNEGEQNVDYVLTTTEASRMIQESGIDLSQVEPEALDMPFGISSGAGAIFGVTGGVTEAVLRRLMNSDRAEDLEAISFTG…	[FeFe] Group A3	[FeFe] Group A3	Bifurcating	Labile	3	[FeFe]-centre, 3 x [4Fe4S] clusters, 1 x [2Fe2S] cluster	NADH dehydrogenase, thioredoxin	0.134815	0	0	0	0	0	0.808891	0	0	0	0	0	0	0
WP_006784034.1	MGVISFSEANCKNCYACVRACPVQSIKIKNEQAIIMEERCIACGLCLKACPKNVKKIETELEKVKQFIKSGQSVVVSLAPTAFGVFKNQGHKLVAALKKLGVSHVEETVVGAEVVTQVYETYQHFHLDKCYITSCCASVNLLIEKHYPKVIPHLIPVITPLMAHARMLKLKYGQDVKVVFVGPCLAKKIEGEEEESISAVLTIQELKQWFNEAGIKLNELEEVPLDDGLVSQRTYPMVGGMSKCFNEKDKKIEIVSVDGIRDCIEVIEGIERGEFKNIFFEMSACHHSCLGGPAIGEECENIFNRKMRIKDYARQTQPLHEMSEGGRLSLINLNRVFKNQYSPIIQPSEKEIELILNNIGKYSSMDELNCGSCGYPTCRQKAIAVYNHMAEPTMCLPYM…	[FeFe] Group C	[FeFe] Group C3	Sensory	Labile	2	[FeFe]-centre, 2 x [4Fe4S] clusters, PAS domain	Phosphatase	0.134815	0	0	0	0	0	0.808891	0	0	0	0	0	0	0
WP_006905160.1	MVKNDQNINSLKHHIMEEIARLAWADQLTPENEEKVTYEISPGPKAKYRCCVYKEREIVRERIRLAKGLCPSPNRESNNIIQVIDPACDDCAMQTYTVTDNCRFCLGKACINSCKFGAISEGDLRMHIDPAKCKECGQCAKNCPYEAIVHLTRPCKRACPVGAITFDEYGFCKIDEEKCVSCGHCIHSCPFGAIGSKTYLVQIIKAIKAGKEVIAMCAPATEGQFGEEITMASLRNALKEIGFSDMVEVGLGGDMTAAYEALEWSEARKEGRKMTTSCCPAFIRMLQKHFPDQYKENMSSTVSPMTAVSRYLKATHPGCVTVFIGPCIAKKAESQDTSVPDTADWVISYGEFRALLRSKGVEPKPVDDPYQEASIWGKRFASSGGVANAVIECMKERGE…	[FeFe] Group B	[FeFe] Group B	Evolving	Labile	1	[FeFe]-centre, 3 x [4Fe4S] clusters, 1 x [2Fe2S] cluster	None	0	0.12325	0	0	0	0	0	0	0.739501	0	0	0	0	0
WP_006928134.1	MFTVEINGRKIEARNGETILDVLNRAGAKVPTLCHLKGLFPSGACRICSVEVEGFNTLIPSCAYPVQDGMIIKTNTPRVVKARKTIIELLLANHVQDCLYCVRNGDCELQELAAVYGVRERRYPAGPEKRPVDVSSPSIVHDQNKCILCGKCVRTCEEIVGVAAIDFVHRGSKTVIAPAFEFNLNVSSCIGCGQCVLVCPTGALRERSSLKEVTDALQNPEKFVVVQHAPAVSVTLAEEFGLKAGSDADRLLVNALRRLGFDRVFDTAFSADLTIMEEASELVERLQNGGSIPMMTSCSPGWVKFVEQFYPEFIPNLSTCKSPQQMMGAVIKNIFAREQGISPDKIFSVSVMPCTAKKFEAERPEFSHNGYADIDAVLTTRELIRLIRMYGIEFDSLKP…	[FeFe] Group A3	[FeFe] Group A3	Bifurcating	Labile	3	[FeFe]-centre, 3 x [4Fe4S] clusters, 1 x [2Fe2S] cluster	NADH dehydrogenase, thioredoxin	0.118737	0.327579	0	0	0	0	0	0.712424	0.739501	0	0	0	1.22598	0
WP_007049654.1	MKEIFTPIVDIRRKVFKEVALLAYENKEPELEKLAAEIVEEQDNKITNKKREKALILERIRLALGLDVSSNETPFDEDKDKENILGEKNVLNLPLVNVVSKACMQCEENTVFVTNNCRGCYAHPCSEVCPVDAVYFENGKSVINKDKCVRCGRCVEACPYNAIVKFDRPCKASCGVNAYTEDEEGNAKIDYEKCVSCGQCIVACPFGVVSDKSEIYQTIKAIQNNNEVIAEIAPAFVGQFGKGASPEKIKEALLKLGFSDVIEVALGADMGAVFEAKHFIEKVKTGEEPFLATSCCPSWAVMAKRDYPDIAPYVSPALTPMVATARVIKENHPNAKIVFIGPCSAKKLEANRRSVKSDVDYVLTFEEVAGMFEAKGIDVDSFEGEKLDDATAAGRGYGY…	[FeFe] Group B	[FeFe] Group B	Evolving	Labile	1	[FeFe]-centre, 2 x [4Fe4S] clusters	None	0.316	0.768671	1.18357	0	0	0	0	0.712424	2.2185	0	0	1.46124	0	0.932283
WP_007050317.1	MVNLKINNVDVSVEEKTTILEAARQIGINIPTLCFLEHNKIGACRMCVVEIKGSDVLRSACNFPVKEGMEVFTNSPKVRESRKNTLELTLSDHNRDCTTCIRSGNCELQTLANDLGVNTVPFKGDFSSDTYDDKSLSVVRDESKCIFCKRCINTCAKIQGIGALIGKDNGFDSKSRPVKGDVLADTNCINCGQCIINCPVGALTEKVNVDEVWEALSDENKHVVVQPAPAVRAALGEEFGYEIGTDVTGKMVASMRRLGFDKVFDTDFGADMTIMEEAYELVDRVTNGGTLPMVTSCCPAWVKMCEQEYPELLDNLSSCKSPQAMTGALIKTHYAEVNNIDPKDIYVVSVMPCVAKKFEVAREQLKEDDLFDSDVCITTRELARMIKEAGIDFKNLDDE…	[FeFe] Group A3	[FeFe] Group A3	Bifurcating	Labile	4	[FeFe]-centre, 3 x [4Fe4S] clusters, 1 x [2Fe2S] cluster	NADH dehydrogenase, thioredoxin, thioredoxin	0	0.696111	0	0	0	0	0	0	0.739501	0	1.04364	1.46124	0	0.932283
WP_007059414.1	MKYMNFSSANCKNCYKCLRSCPVKAIKFKNQQAEIVEDRCIACSHCMAICPQKARHIVSDLERLKEAINSGKKVIATIAPSFAGVFDVDPGRFVSVLRKLGFSHIEETASGADVVSELYRQYMKEEKLDNYISTACPSANYIIEKYFPQLIKYMIPTVSPMIAHGKVLRKIYGEDSFIVFIGPCMGKKIESESFINKDVLDAVITFEELTDWVEGLNMDIQGLEPGEFDRNSFKDGRKYPLFKGIVSCVSDVIQEKKLEVISISGTEECMELFKSIEKGEVTNAFIEASACKGSCIGGPGMVNNEKGYYKRVQKVKNYINRNTSMGEQKLDIDEDIDFSRSFIDKSIEKIAASEKEIEKIMMEMGKYSVQDELNCGVCGYNTCREKAQAIFEGMAESNM…	[FeFe] Group C	[FeFe] Group C3	Sensory	Labile	2	[FeFe]-centre, 2 x [4Fe4S] clusters, PAS domain	Phosphatase	0.335017	0.15538	1.18357	0	0	0.826529	0	0	0	0	0	0	0	0.932283
WP_007060145.1	MKMVNLTINDIKVSVPEGTTILDAAKKVNINIPTLCYLDLHDIKMVNRTSSCRVCLVEVEGRRNLAPSCSTEAFEGMIVKTNSPRAIKARRTMVELLLSDHPTDCLVCEKNTQCQLQLIAAELGIRKIRYKGAMSNYKKDSSSGAIYRNLDKCIMCRRCETMCNEVQTCQVYSAVDRGFETVVSPAFGRPMLDTQCTFCGQCVSVCPTAALTEVSNVAKVWEVIADPDKYVVVQTAPAIRVALGEKFGMEPGTIVTGKMVAALRRLGFDKVCDTDFAADVTILEEAHEFIDRLQNGGRLPILTSCCPSWVKFIEHQFPDLLDIPSTCKSPHIMFGTLAKTYMAEKLNIDPSKIVVVSVMPCIAKKYEISRPELEHEGEKNVDLVVTTRELADMIMEAGI…	[FeFe] Group A3	[FeFe] Group A3	Bifurcating	Labile	3	[FeFe]-centre, 3 x [4Fe4S] clusters, 1 x [2Fe2S] cluster	NADH dehydrogenase, thioredoxin	0.335017	0.204329	1.18357	0	0	0.826529	0	0	0	0	0	0	1.22598	0
WP_007063270.1	MSNDTAIIRIDEELCTGCRRCSEVCPVDAIEGKDGVPQHIDTDKCVMCGQCVQVCKGYYSVYDEPATPLSKKYYDRGMLDNVEEPIFAAYKACQVKKIKDLLENKDLFKVVQCAPAVRVGISEDFGLPLGTLNPKKMAAALRKLGFDRVYDTNFSADLTIMEEGSELIERVTKGGTLPMFTSCCPAWVKYLEQTYPELLDHLSTCKSPQQMAGAIFKTYGAKINNVNPAKMLSVSVMPCTCKDFESGREEMKDSGYRDVDLVITTRELAYLIKDSGIDFKELEEEEFDDPLGMYTGAGTIFGATGGVMEAALRTGYELITKKQIPSVDLSAVRGGEGFRTAEVQVGDLKLKVGIVSGLKNAAPVLESIKKGECDLHFIEFMTCPIGCVSGGGQPKLLLD…	[FeFe] Group A4	[FeFe] Group A4	Bifurcating	Labile	6	[FeFe]-centre, 3 x [4Fe4S] clusters, 1 x [2Fe2S] cluster	NADP dehydrogenase, four FeS proteins	0.256492	0.12325	0	0	0	0.826529	0	0.712424	0.739501	0	0	0	0	0
WP_007156182.1	MQMVNCTIDGKKVCVPEHTTILEAAKEIGVYIPTLCYFKDLNEIGACRVCVVEVEGDQRLHAACNSPVLEGMVVHTNSKKAREARKCNVELILSQHNVTCTTCVRSGNCALQHVANDLNIMGESFPKDLPKQKGSKSFPLIREYDKCIKCMRCIQVCDKIQATHVWDVINSGGKSTVDVRDFYRLEDSPCSLCGQCITHCPVGALRERDDTDKVLDALDDPETIVLAQIAPSIRTAWGEEFGLDAEEASVQRLASCLKEVGFDYVFDTDFAADLTIMEEASEFLHKLTHQEGDFPMFTSCCPGWVRFIKSHYPEYIPQVSTSKSPQQMFGAIAKSYYADILKVSPKKIFSVSIMPCLAKKAECSYPNMTDSEGNFDVDVALTTREVNRLIRAMHISPKK…	[FeFe] Group A2	[FeFe] Group A2	Evolving	Labile	2	[FeFe]-centre, 3 x [4Fe4S] clusters, 1 x [2Fe2S] cluster	NADH-dependent glutamate synthase	0.458647	0.575821	0	1.11646	0	0.826529	0.808891	0	1.479	0	1.04364	0	0	0.932283
WP_007285570.1	MTNMKPTMIHSDRGSVFSVFSEEELKNMTNNSKRKVAICGRINNSGIVEVPEGATLAEIIELAGGILDKRDFKGAHVGVPPYGRFLSKEDLDKELDFDLFDNYIRAINVLSEEDCIVQYAKFYTDSVIGLMQNEGSLKDYAKVQKPLGKVWQILDRISKGRSNMRDLYILRSLAEEVKEELNQKHNIMEEIIENYYDEIKEHIEDDRCYTMQCNNLIKLTITEKCIGCGICQRVCPVDCIAGEKKEQRRIDYNRCTHCGRCLSACPVDAITAGDNTLKFIRDLSTPNKLVITQMAPAVRVAIGEAFGFEAGDNVEHKLAAGLRKLGVDYVFDTSWAADLTIMEEAAELQNRLERYFSGDKSVKLPMLTSCCPSWVKFIEQNYGDMLDVPSSAKSPMQMF…	[FeFe] Group A1	[FeFe] Group A1	Evolving	Labile	1	[FeFe]-centre, 2 x [4Fe4S] clusters	None	0.866257	0.44787	0	0	0	0.826529	0.808891	3.56212	0	0	0	1.46124	1.22598	0
WP_007286821.1	MSLINLTINGKAVAVEEGTNILEAAKKVNIKIPNLCYLHIDDIGFDNSCASCRVCLVNADGRLVPSCATLAKAGMKVQTNTPEIIEFRKGVVELLLSDHPQDCYTCTKCGSCGLQDIAVQLGIKKIRFEGERLEKSKDNSSFSIMRDNDKCILCRRCETMCNQVQKVGVLSGVNRGFSTEIGTFFETDLAKTECTFCGQCINVCPTGALLEKDNTDEAWGLLAQKEKPVMVQIAPAVRVGISEEFGLKPGTISTGKVVAALKALGFDYVFDTNFAADLTIMEEANEFVNRLTKGGDLPIMTSCCPAWVNFCESQYPDLTKYLSTCRSPQSMFSPIARYYFADKVLDKKPDEVSVVSIMPCVAKKYEVKREELGQDGIIDTDLSLTVRELARMIKSAGID…	[FeFe] Group A3	[FeFe] Group A3	Bifurcating	Labile	3	[FeFe]-centre, 3 x [4Fe4S] clusters, 1 x [2Fe2S] cluster	NADH dehydrogenase, thioredoxin	0.137755	0	0	0	0	0.826529	0	0	0	0	0	0	0	0
WP_007287482.1	MSSNFSKKGCRGCYACVRVCPVDAIVIKGGQADILMDRCILCGRCSKACPQHYRVEKTSINSVKNFIKSGETVIASVAPSFASAFGKQSLKIPAVLRHLGFTHVEDSGITTKPIFDIYNAYANEKDNENYITSMCPTINHLIQKHYPELTNSIIPVVPPFISHGRFLKHKYGTDNKVVFIGPCVAKKTDATKEICVDEVITFYELQKWLQSENLNLEDFPIEPFDYIYKDKIIFPIAGETSDFIESKNPSKTVFCVNGIEDCKSVLNSIKNGKFENTFFEMNACNHGCLYGSDLDKDDRCFFEVKRDLINNKQKYIDLFQAKAVKNPYEDIALDVLLYKEYPPKPFKFEQPTEYEIKEILKTMGKTSRADELNCGSCGYKTCREKAIAVFNGIAEPSMC…	[FeFe] Group C	[FeFe] Group C3	Sensory	Labile	2	[FeFe]-centre, 2 x [4Fe4S] clusters, PAS domain	Phosphatase	0.776429	0.495176	1.18357	0	1.03069	0.826529	1.61778	0	0	0.995132	1.04364	0	0	0.932283
WP_007288799.1	MEMVNITIDGQKVQVPKNATVLEAARSCGVKIPSLCYHPELRPEGACRVCMVEVEGARTLVASCVYPVSEGMVVRTNTPAVRQARKLVVELLLANHPQDCLSCQRNLNCELQTIAADLGIRKIRFDGEKKSYPLDADNPSLVRDPSKCILCGRCIRACSERQGVHVYSFVNRGFNTTVAPAFNQGLHQVACTYCGQCASVCPTGAIVEKDDTAAVWQALSDPAKHVVVQTAPAVRVALGEALGMGTGSIVTGKMVAALRRLGFDKVFDTDFTADLTIMEEGSEFLDRLAKGGKLPMITSCSPGWVNFIELMYPDLLDHLSTAKSPQQMFGALAKTYYAERVGIDPKDIVSVSIMPCTAKKAEAVRPEMRASGYQDVDYVLTTRELARMIREAGIDFAGL…	[FeFe] Group A3	[FeFe] Group A3	Bifurcating	Labile	4	[FeFe]-centre, 3 x [4Fe4S] clusters, 1 x [2Fe2S] cluster	NADH dehydrogenase, thioredoxin, thioredoxin	0.171781	0.24354	0	0	1.03069	0	0	0	0	0	0	1.46124	0	0
WP_007863168.1	MGMEIIDFKATKCKHCYKCVRYCEVKAIQVKDERAVIMSDKCILCGHCLKICPQSAKTLRSDLDMVKGFIREGMRVVVSIAPAYMGLLKYKTIGQVRGALMRLGFEDVRETSEGAAFVTAEYAKLLKEHRMDNIITTCCPSVNDLIEIYYPQLVPYMAPVVSPMIAHGKLLKEELGRNVKVVFLGPCIAKKKESRDPRHDTYIDAVLNFNDINKWLEEEDIVIEDCEDQPFTAFDPRVNRLYPVTNGVVNSVLATEEESDGYRKFYVHGVANCIDLCKSMSRGEIKGCFIEMNMCSGGCIKGPTVNDEFISRFKVKLDMEETIGREPAEASRMQPVWENVNFGKRFEDHAPKDPQPTEDQIREILRMTNKLKPEDELNCGACGYPTCREKAIAVFQHKA…	[FeFe] Group C	[FeFe] Group C3	Sensory	Labile	3	[FeFe]-centre, 2 x [4Fe4S] clusters, PAS domain	Phosphatase, thioredoxin	0.197262	0.612988	1.18357	0	0	0	0	0	0	0	0	0	3.67793	0
WP_007866252.1	MSKHLSPEVRVPIEKENVSIFRDEERCIKCGQCRDMCRDYIGVLGTYDLLKTGDTAICINCGQCANVCPVESIREQPEYGMVAAEVMDPDKIVVVSTSPSVRAALGEEFGMEEGSFVQGKMVALLRTLGVDYVLDTNFAADLTIVEEASELIDRITTGRRPLPQFTSCCPAWVKFAEIYYPDMLPHISTAKSPIGMQGPTIKTYFARKMGIDPKKIVNVAVTPCTAKKYEIRRQEMKAAEEYLGEDDMRDMDYVITTRELAQWARMKRIDFSSLEDSDYDRLMGQGSGAGVIFGNTGGVMEAALRTAYEYITGEQAPGVLYELTPVRGMEAVREASLQIADMTVNVAVVYGTASLRRFLEEMRNGEKQYHFVEVMTCPGGCIGGGGQPKDKKFEGDALR…	[FeFe] Group A1	[FeFe] Group A1	Evolving	Labile	1	[FeFe]-centre, 2 x [4Fe4S] clusters	None	0.171781	0	0	0	1.03069	0	0	0	0	0	0	0	0	0
WP_007953234.1	MEMVNITIDGQPVQVAKSATVLEAAQTVGINIPTLCYHPELRTAGKCRVCMVEVEGARSLVASCVYPVNEGMVVRTTTAGVREARRLVVELLLANHPQDCLSCQRNLNCELQTIAADLGIRKGRFEGQRKSYPLDESNPSLVRDQSKCILCGRCVRVCSDRQGMNVYSFANRGFNTTVVPAFNQGLHEVACTFCGQCAAVCPTGAITIKDDTEAVWRELSDPSKHVVVQTAPAVRVALGEALDLPQGTIVTGKMVAALRRLGFDRVFDTNFSADLTIMEEGFELLDRLKNGGKLPMITSCSPGWVNFAELKYPDLLEHLSTAKSPQQMFGALVKTYYAEKAGIDPKDIISVAVMPCTAKKAEAGREEFRSSGYQDVDYVLTTSELAMMIREQGLNFNAL…	[FeFe] Group A3	[FeFe] Group A3	Bifurcating	Labile	3	[FeFe]-centre, 3 x [4Fe4S] clusters, 1 x [2Fe2S] cluster	NADH dehydrogenase, thioredoxin	0.450815	0.44787	1.18357	0	0	0	0.808891	0.712424	0	0	0	1.46124	1.22598	0
WP_008021616.1	MEDKQITLQIDGHFITVPEGSTILEAATKIGINIPTLCHIDLKDACIKNNPASCRICVVEVIGRRNLAPACATRCTEGMVVKTSTLRVMNARKVVAELILSDHPNDCLTCPKCGNCELQTLALRFNIREMPFNGGELSPRKREITASIVRNMDKCIFCRRCESVCNDVQTVGALGAIRRGFNTTIAPAFDRMMTESECTYCGQCVAVCPVGALTERDYTNRLLDDLANPDKVVIVQTAPAVRAALGEEFGFPPGTLVTGKMVYALRELGFDYVFDTDFAADLTIMEEGSEILNRLTRYLNGDKSVRLPILTSCCPAWVNFFEHHFPDMLDIPSTARSPQQMFGSIAKSYWAEKMGIPREKLVVVSIMPCLAKKYECARDEFKVNGIPDVDYSISTRELA…	[FeFe] Group A3	[FeFe] Group A3	Bifurcating	Labile	2	[FeFe]-centre, 3 x [4Fe4S] clusters, 1 x [2Fe2S] cluster	NADH dehydrogenase	0.666817	0.165855	0	0	0	2.47959	0.808891	0.712424	0	0.995132	0	0	0	0
WP_008193913.1	MADVTVVINGRTLTVPDNLTVIEACEKAGIEIPALCHHPRLGESIGACRVCVVEVEGARNLQPACVTKVRDGMVIKTSSDRVKTARKFNLALLLSEHPNDCMTCEANGRCEFQDLIYKYDVEPIFGYGTKEGLVDRSSPAIVRDLSKCIKCQRCVRACSELQGMHIYSMVERGHRTYPGTPFDMPVYETDCIGCGQCAAFCPTGAIVENSAVKVVLEELEKKEKILVVQTAPSVRVAIGEEFGYAPGTISTGQMVAALRRLGFDYVFDTNFGADLTIMEEGSEFLERLEKGDLEDLPMFTSCCPGWVNLVEKVYPELRTRLSSAKSPQGMLSAMVKTYFAEKLGVKPEDIFHVSIMPCTAKKDEALRKQLMVNGVPAVDVVLTTRELGKLIRMKKIPFA…	[FeFe] Group A1	[FeFe] Group A1	Evolving	Labile	1	[FeFe]-centre, 3 x [4Fe4S] clusters, 1 x [2Fe2S] cluster	None	0	0.17394	0	0	0	0	0	0	0	0	1.04364	0	0	0
WP_008371804.1	MGYMTIDGRKVEFTDEPNVLSVIRNADIDIPTLCYHSELSVYGACRLCTVEDERGKTFASCSEPPRDGMVIYTNTPRLMKYRKMILELLLAAHCRDCTTCIKSGECQLQALAHRMGVTTVRFENTKEQYPLDFSSPSIVRDPNKCILCGDCVRMCDNVQSVNAIDFAYRGTKALVTPAFNKKIAETDCVNCGQCRVVCPTGAISINTNIEVIWDFLADKNTKVIAQIAPAVRVAVGDQFGLPRGENVMGKLVNVLHRLGFDEVYDTSYGADLTVIEESEELLERLASGENLPLFTSCCPAWVKFCENRYPDLAKNLSTCRSPQQMFGAVIREYYKDPEKNGGKRIVSVSIMPCTAKKEEILRPESSTNGKQDIDYVLTTTELITMIRKSGIRFENLEIE…	[FeFe] Group A3	[FeFe] Group A3	Bifurcating	Labile	3	[FeFe]-centre, 3 x [4Fe4S] clusters, 1 x [2Fe2S] cluster	NADH dehydrogenase, thioredoxin	0.118737	0.310761	0	0	0	0	0	0.712424	0	0	0	0	0	1.86457
WP_008382437.1	MTSSDVSAAPAGATATDTTARELSATINGQPVTGRAGESILECARRHGVYIPTLCELADIDHTPGTCRVCLVEIRTKGSSKTHLVTSCTTPMEDGIEIRTRTAALRAMQRLQVELLLADHDQDCATCIRHGKCDLQDVAQFVGLTQNRFFDPARVAARPVDDSSPALIRNMQRCIRCQRCIAICRDGQGVDALIQTGSGLETAVGLRYGLTQKNSACVTCGQCVLVCPTGALGERDETDRALEMMYDPELITVVQFAPAVRVGFGEEFGLPPGTNVEGQIITALRMLGADIVLDTNWGADLVIMEEGTELLHRLKKKQRPTFSSCCPAWINFVERHYPDIIPMLSSTKSPQQCVGTLAKTYLPEKMGIDPKKIRVISVMPCIAKKDEIARRQLSHDGVP…	[FeFe] Group A2	[FeFe] Group A2	Evolving	Labile	2	[FeFe]-centre, 3 x [4Fe4S] clusters, 1 x [2Fe2S] cluster	NADH-dependent glutamate synthase	0.118737	0	0	0	0	0	0	0.712424	0	0	0	0	0	0
WP_008410184.1	MTKLTYDQIFKDLVKSAYDGKLDEGIAKLKKQGDGDVEKYIQYAVGGGDPDRVVYKVRDCSCGCEDEGCQVSCLMGAIERDEQGHVVIRGSHCTDCGQCVEVCQHDCLVDRKEFIPLVEILKNRKVPVYAIIAPAFIGQFGEEVSPGQLRAALKRLGFYGMVEVALFADILTFREALEFDAHVQKSGDFVLTSMCCPMWVSMVKKVYTRLSSHITPSVSPMVACGRSVKKLHPDAKVVFIGPCIAKKAEAKEPDVRDAVDVVITFKELQQIFEAVGIDPAAMVADEKEHSSTGGRIYARTGGVSKAVADTLKRIRPDKQIQIKAVQAHGVKECKQLLQDALDGKIIANFYEGMGCVGGCVGGPHVLIDPARGTELVNRYGEQANSLTPADNKYVLALLK…	[FeFe] Group B	[FeFe] Group B	Evolving	Labile	1	[FeFe]-centre, 2 x [4Fe4S] clusters	None	0	0.165855	0	0	0	0	0	0	0	0.995132	0	0	0	0
WP_008521264.1	MVNIVIDGKSIQVPEKTTILEAAKSVGIKIPTLCYFKGLNEIGACRICVVEVEGYDRLFTACNSPVEEGMVIQTNSRKARETRKANLQFILSEHQDRCPMCVRNGNCELQKTAGDLNVHSTPFKKHIDDRTSNPDFPLIRDYSKCIKCMRCVQVCDKIQHSNVWDVVNSGGTITVDVGKAYRLEDAPCVLCGQCITHCPVGALHERDDTQKLMDAIDDPDKIVLVQIAPAIRTAWCEEFGMKPEEATVNRLASALRIIGFDYVFDTNFSADLTIMEESSEFVERLTHADQFKFPMFTSCCPAWVRFVKANWPKYIPQLSTAKSPQQMFGAIAKSWYPQLLGVDPKRIFSVSVMPCLAKKAECALPTMNSAGAGQDVDLAITNREITRLIRAHQIDPTDL…	[FeFe] Group A3	[FeFe] Group A3	Bifurcating	Labile	1	[FeFe]-centre, 3 x [4Fe4S] clusters, 1 x [2Fe2S] cluster	NADH dehydrogenase, thioredoxin	0.137755	0	0	0	0	0.826529	0	0	0	0	0	0	0	0
WP_008709061.1	MKYINVAEANCKNCYKCLKVCPVKSIKYSNNHVEVLENECILCGRCIRNCPQHAKSLVNDISAIKQAVGEQGAARTADASAGLPPEVFSNVRQGEQGAARVIAALAPSYIASFGAENRFRLAGALHRLGFDAVEETSVGAHAVTKEYARILESDSMDNMITTCCPSVVFLVQKYFPQLTPQLAQVLSPMEAHGEFLRKKYGDDALIVFFAPCISKIEEARVSEKRFIDGVVTFKQLARWFIKEDIELEKCAEGYFGNDPSSSAIYPVFEGIVKDVRANLPEDSHVFNKYTFLSVQGAKDVIELLEEISEGRIHNCFIEASTCYGSCINGPEKPDTEYHPVSTGIDMIRYLRAEKNIREADISSLDLRRHIEPKPLREDIPDEETIRSILAEIGKTKPEH…	[FeFe] Group C	[FeFe] Group C3	Sensory	Labile	2	[FeFe]-centre, 2 x [4Fe4S] clusters, PAS domain	Phosphatase	0.461586	0.24354	0	1.11646	0	1.65306	0	0	0	0	0	1.46124	0	0
WP_008749893.1	MVNLTIDNIPVSVKENTTIMEAAAGINIEIPKLCFLKGLNEIAACRVCVVELKGKDKLITSCNNVCEEGMEIFTNSKKVIRDRRKTVELILSQHDNRCVICAKSGNCSLQKVANDLNILEIPFAVELEKQPWNKNFPLIRDSSKCIKCMRCIQVCDKMQTLSVWDLHGTGARTTVNVTGYKKIEDANCSLCGQCITHCPVGALSERDDTSKFWDAVADPEKTVVVQIAPAVRTAWGEVFGLKDKDATVGKIVDALKKMGADYVFDTSFSADLTIMEEANEFVHRYTNGLIGDRPMFTSCCPGWVRFAKSQFPRMAKSLSTAKSPQQMFGAVMKSYFAEKIGVNPENMVSVSIMPCVAKKGEREMELFHGEYAGHDVDIALTTRELTRMIRASHIDPKSL…	[FeFe] Group A2	[FeFe] Group A2	Evolving	Labile	2	[FeFe]-centre, 3 x [4Fe4S] clusters, 1 x [2Fe2S] cluster	NADH-dependent glutamate synthase	0.134815	0.29719	0	0	0	0	0.808891	0	0.739501	0	1.04364	0	0	0
WP_008753040.1	MRGVETRIQEIRHRIFREVARMAYHTEWPVDKRIEELPYKIIPGEVGNFRNNVFLERAIVGERLRLAMGLPYRSAANHAPLSEGIEQADKAETYYTPPLINIIKFACHGCVEKRVYVTNGCQGCLAHPCAEVCPTGAVKIDKESGFSSINQEKCIKCGRCANVCAYNAIIIQTRPCAASCGMDAISSDENGKADIDYDKCVSCGQCLVNCPFGAISDKSQIFQTIRAIQSGERVYAAIAPAFVGQFGPKVTPGKLRAAMKALGFADVFEVAIGADLCATQEAEDFLTEVPEKLPFMGTSCCPSWALMAKKVFPDQANCISMALTPMTLTARLIKKHHPDGKVVFIGPCSAKKLEAMWTEVRSEVDFVLTFEEMAGIFDAKHIDIENLEEDPNGVNDAST…	[FeFe] Group B	[FeFe] Group B	Evolving	Labile	1	[FeFe]-centre, 2 x [4Fe4S] clusters	None	1.17379	0	0	2.23292	0	2.47959	1.61778	0.712424	0	0	0	0	0	0
WP_008901930.1	MKESYSRIVDIRRRVFAEVARIAYNDLDTSNFEDASYRLFPGEVAQFRESMFRERAIADERIRLALGLPIRNIGVYKKITDGFDKIDIDTNAYEKPLVNVIKFACESCPTRTIYVTDNCRRCMAHPCTNVCPVNAVKIGKHRAEIDHDKCVKCGRCKDTCPYHAIVDFDRPCSAACGVGAIGSDEYNRAEIDQDKCVACGRCISECPFGAIADKSQIYQVIKAIKAGKKLYAAVAPSFIGQFGLSTTPKQVFEAIKELGFKDVIEVGLGADLTTLHEAHEYLERVPEKIPFMGTSCCYSWSLMIKNMFPELKEQISDSGSPMRYTAEYIKNIDPEAVVVFIGPCTSKKLEALDTNIKSSVDFVLTFEELMGMFVAKDVEPMDIEIEDDVEDSSALGRGY…	[FeFe] Group B	[FeFe] Group B	Evolving	Labile	1	[FeFe]-centre, 2 x [4Fe4S] clusters	None	0.134815	0.2465	0	0	0	0	0.808891	0	1.479	0	0	0	0	0
WP_008907580.1	MELVKLTIDGFEVEVPKGTTVLEAARKIGIEIPTLCYLKDVNKFGACRVCVVEVGPRLLASCTLEAENGMVVKTNTQKVREARKAVVELILSNHKRECTTCIRSENCELQKVSKELNIRDLRFEGEKTHEDIDSASASVVRDPEKCILCGRCIATCSEVQTVYAINFARRGFKTKVSPAFNKSLADTVCINCGQCIMACPVGALHEKENIKEVWMAISNPEKFVVVQTAPAVRVALGEEFGMPIGTRVTGKMVAALRRLGFDKVFDTDFGADLTIMEEGTELLNRLNKGERLPLMTSCCPGWVKFVEHYYPEMTENLSTCKSPSEMEGALIKTYFAEKMGIDPKNIVTVSIMPCVGKKFEGQREELSHNGLQDVDYVLTTRELAQMIKEAGIDFVNLPD…	[FeFe] Group A3	[FeFe] Group A3	Bifurcating	Labile	4	[FeFe]-centre, 3 x [4Fe4S] clusters, 1 x [2Fe2S] cluster	NADH dehydrogenase, thioredoxin, thioredoxin	0.357858	0.739935	0	1.11646	1.03069	0	0	0	2.2185	0.995132	0	0	1.22598	0
WP_009139069.1	MARSIIDPITRIEGHLRAEMEVTDGVVTDAWVSGGCFRGMELVVRDRTPEDAAFIVQRICGVCPVSHMHASSIAAEKAYGISIPNNARIIRNLIEGSQFLHSHILWFYNLAGLDYVNPLNALSADPVAAYDLATELGTPSADFVGLQDRLKKFAENGQLSIFSGNWFDTGEYNLTPEADLILTAHYLEALQMQAKASEIAGLLGGKMPHIMTIIPGGTAFVPTAEKLDDLKGLVDELYTWVANTMIPDTLAVAKFYPEATTFGKGCGRYGAWGVFERPSMEMNDRYLPAGVLDDQLNLSDVDESKITEYVGHSWYEGDADLPPFEQGVKPAFTEYNVDDRYTWNKCPRYDGKPLETGGFARLLVAYKRNVPFVVEHIDSMLVALGAQKGDLSALQNTLG…	[NiFe] Group 1a	[NiFe] Group 1i	Anaerobic Uptake	Sensitive	3	[NiFe]-centre, 3 x [4Fe4S] clusters	Cytochrome b	0.197262	0	1.18357	0	0	0	0	0	0	0	0	0	0	0
WP_009139152.1	MVGNMEKDACRVQSDASKVCVTIDDIEVSVPRSATVLEAARIAGVDIPTLCYLELYNEIGACRICLVEVEGIDHLVAACNSPVFDGMKVRTDTQRVRSSRKMNLKLILSRHDRRCPTCFRNGTCRLQELADTMGIHEVSFKTSFDESPVDDRYPLVKEPAKCISCLRCVSVCSKVQALSVWGLVDSGSRSRVDAVAKDDCSYCGQCITHCPVGALHERSDVSRVFDAIDDPEITTIAQIAPSVRTSWHEGLGLAKDKASVGRMVAAVKSLGFDYVFDTDFAADVTIMEEGSELLDRLGKGGDGPMFTSCCPGWVRFLKARYPELVSKLSTTKSPQQIFGALAKTYYAKLLGVDPSRLFVVSYMPCVAKKAECAYPGMDAAGTGFDVDAVLTVRELTRQI…	[FeFe] Group A2	[FeFe] Group A2	Evolving	Labile	2	[FeFe]-centre, 3 x [4Fe4S] clusters, 1 x [2Fe2S] cluster	NADH-dependent glutamate synthase	0.306596	0	0	0	1.03069	0	0.808891	0	0	0	0	0	0	0
WP_009145651.1	MMQMVNLTIDGKQIQAPAGSSVLEAARSAGIYIPTLCYHPDLRPEGACRLCMVEASGARTLVASCVYPVSEGMVVKTNTSKVREARKTVLELLLTNHPKDCLCCQKNGDCELQKIAADLGVRKLRFEGGETRARTIDNSNPSLVRDQEKCILCGRCIRVCRDVQGMSVYSFAGRGFNTMVSTAFEHDLLNSACTYCGQCADVCPTGAIVEKDDTDKVWAAINNPEKVVVVQTAPSVRVALGEELGIPAGQVVTGKMVAALRHLGFDKVFDTNFSADLTIMEEGHEFLQRLQNGGVLPMITSCSPGWVNMIELKYPELLPHLSTAKSPQQMFGAVAKTYFAERAGIDPAKIVSVSVMPCTAKKAEAAREEMCASGYRDVDVVITTRELGRMIREAGIDFN…	[FeFe] Group A3	[FeFe] Group A3	Bifurcating	Labile	3	[FeFe]-centre, 3 x [4Fe4S] clusters, 1 x [2Fe2S] cluster	NADH dehydrogenase, thioredoxin	0.428273	0.12325	0	0	1.03069	0.826529	0	0.712424	0.739501	0	0	0	0	0
WP_009165839.1	MVNVVIDGKRIKVPERTTILDAAKAAGIRIPTLCFLEGVNEIGACRVCVVEVEGHERLFTACNNPVEESMVIHTNSKKAREARRANVRMILSEHDDHCPSCVRSGNCELQRIANELNIHDTPFEKHYVSRRTSPDFPLIRDFSLCIKCMRCVQVCDKIQHANVWDVVNTGAKTTVDVARVYRLEDADCALCGQCITHCPVGALHERDDTQKVLDAIDDPEKIVLVQIAPAIRTAWGEEFGMKPGEATVTRLAAALRLVGFDYVFDTNFSADLTIMEEGSEFVERLKHRDREKFPMFTSCCPGWIRFVKSHWPQFVGQLSSAKSPQQMFGAVAKSWYAQTLGVDPSRIFSVSIMPCLAKKAECALPGMDGAGAGQDVDVALTTREVSRLIRSLQIQPQDL…	[FeFe] Group A2	[FeFe] Group A2	Evolving	Labile	2	[FeFe]-centre, 3 x [4Fe4S] clusters, 1 x [2Fe2S] cluster	NADH-dependent glutamate synthase	0.450815	0.24354	1.18357	0	0	0	0.808891	0.712424	0	0	0	1.46124	0	0
WP_009206448.1	MGTRITIDPITRIEGHLRIDCQVDGGKVTKSWASGQMWRGVEEILLGRDPRDAWAITQRICGVCTTVHAIASVRAVENALNLEVPLNAQYIRNLIITAHAIHDHIVHFYHLSALDWVDVTSALKGDPAKTALLAESLSTWSGNSQQEFTKVKERLSGFVGTGQLGIFTNGYWGHPAMKLSPEVNLLAVTHYLQALDVQRKANKIVAVLGSKTPHIQNMAVGGVANPIALDSQSVLTVERLLAIKTWIDELADFVKNVYLVDVAAIGAFYADWTQIGTGITDYLSVPDIPLDTKGTQFALPGGYIPGGDLSKFHAIKSFSDPYFRDGVEESVKHAWYKGGKGALHPYKGETVPEYTDFQDNGKYSWVKSPTFYSKPAQVGPLARVLAMVAANYEPAVKYV…	[NiFe] Group 1c	[NiFe] Group 1c	Anaerobic Uptake	Sensitive	4	[NiFe]-centre, 2 x [4Fe4S] clusters, 1 x [3Fe4S] cluster	[FeS] protein, TM subunit	0	0.24354	0	0	0	0	0	0	0	0	0	1.46124	0	0
WP_009304598.1	MTRSVIDPITRIEGHLRVEMEVTNGKVSDAWVSGGCFRGMEMVVENRTPEDAAQIVQRICGVCPVSHAHSSAIAAEKAYGIKISNNARIIRNLLEGAQFLHSHILWFYNLAALDYVNPLNALKADPADAYDLAQAAGTSMNSDFVALKERLANFADNGQLSIFSGNWFDAEDGTAYQLPPELDLICTAHYLEALTMQAKASQISAIIGGKMPHVMTLVPGGTAFVPTDQKLDELKALADEIYDWVESTMIPDTLAIAPYYIDALNWGKGCGRYVAWGVFEGPGDYASYTEQMANRYLPMGVIDDKLNLSDVQENLITEYMGRSWYKGDATYTSPYFVTEPEYTEYNVEDRYTWVKCPAYDGKPYEAGGLSRVLAAYKRNVPFVVEQVDGLLEALGAPGQ…	[NiFe] Group 1a	[NiFe] Group 1i	Anaerobic Uptake	Sensitive	3	[NiFe]-centre, 3 x [4Fe4S] clusters	Cytochrome b	0.612704	0	0	0	0	0.826529	0	2.8497	0	0	0	0	0	0
WP_009609830.1	MTYFHSVTLDKDRCRGCTNCIKRCPTEAIRVREGKARIINERCIDCGECIRVCPYHAKLAVTDSLEIMKNFRYKIALPAPSLYGQFKDLSINQILSALLDIGFDEVFEVAYAAEIVSKFTREALQKGNLKKPVISSACPAVVRLIQIRFPSLIDHLLNICSPMDTAAIIAKKQAVKKTGLKEEEIGVFFISPCAAKVTSIRNPVGLEKSKIDGAFSMKEIYGKILEKAKTTVVRDLSKATMIGVGWANSGGEAFGTFTENSIYVDGIHNVIDVLEEIELGKLSDLDFFEGLACIGGCIGGPLTVENPFVAKNRIRKLAESLPKREQPPVDEDLVSFEEVKWIKKIEKSEVMKLDKDISKALEMMKEIDRTHKTLPGLDCGSCGSPSCRALAEDIVKGCA…	[FeFe] Group C	[FeFe] Group C1	Sensory	Labile	2	[FeFe]-centre, 2 x [4Fe4S] clusters, PAS domain	Histidine kinase	0.492673	0	0	1.11646	1.03069	0	0.808891	0	0	0	0	0	0	0
WP_009609852.1	MDKVRVTIDGITVEVPSYYTVLEAAKEAGIDIPTLCYLKEINQIGACRICLVEIEGVRNLQTSCTYPVFDGMKVYTNTPKIREARRLNLELILSNHDRNCLTCVRSTNCELQALAKRLGVEEIRFEGENIRYPIDDGSPAVVRDPNKCVLCRRCVAVCSEVQNVFAIGMVNRGFKTMVAPSFGRSLKDSPCISCGQCIMVCPVGAIYEKDHTKRVYEALADDKKYVVAQTAPAVRVALGEEFGMPVGTIVTGKMAAALRRMGFDAVFDTNFAADLTIMEEGSELLERIKHGGKLPMITSCSPGWIAFCEKYYPEFIDNLSTCKSPHMMMGALVKSYYAEKKGLDPKDIFVVSIMPCTAKKLEIEREEMIRNGMKDVDAVLTTRELARMIKEMGIDFVNL…	[FeFe] Group A3	[FeFe] Group A3	Bifurcating	Labile	4	[FeFe]-centre, 3 x [4Fe4S] clusters, 1 x [2Fe2S] cluster	NADH dehydrogenase, thioredoxin, thioredoxin	0.712199	0.991995	0	1.11646	0	0.826529	1.61778	0.712424	0	0.995132	1.04364	1.46124	2.45195	0
WP_010076791.1	MELIQLTINGRKVEVETGTTILEAAKKLNIEIPTLCHLKLQDGKHVSCTSSCRVCSVEVEGKKNLVAACSTPVAPYMVVKTNTQKVANARKTLVELLLSDHPQDCLKCQKNLKCELQKIASDLNIRQIRYEGERTKTPTDFSSVSITRDVDKCILCRRCVSVCNNIQTIGVLSPVFRGFETIISTAFMEPLAETNCTNCGQCVAVCPTGALRETNDEDRVWDALDDEDKYVIVQTAPAIRAALGEQFGLKPGTNVTGKMVSVLKALGFKKVYDTDFAADLTIMEEANELVNRIKNNKDLPLLTSCCPGWIKFLEHNYGEFLNLPSSCKSPQQMFGAIAKSYLAEKLGVDPKKMVVVSIMPCTAKKFEASRKEMEVDGIRDVDIVLTTRELSSMIRSAGL…	[FeFe] Group A3	[FeFe] Group A3	Bifurcating	Labile	3	[FeFe]-centre, 3 x [4Fe4S] clusters, 1 x [2Fe2S] cluster	NADH dehydrogenase, thioredoxin	0.320892	0.331711	0	1.11646	0	0	0.808891	0	0	1.99026	0	0	0	0
WP_010244148.1	MKTLTNQNRIKVTVNGREIEVYDNLTILQALLQEDIHIPHLCYDIRLERSNGNCGLCVVSIGPNGEKDVKACQTPIKEGMIICTNSPKLESYRKVRLEQLLSDHNADCVAPCVMTCPANVDIQTYLRHVGNGNYESAIRTIKDRNPFPVVCGRVCPHPCEAQCRRNLVDSPVAINYVKRFASDWDMSQPHPWVPTKSPSTGKKIAIVGAGPSGLSATYYSAIKGHDVTVFERQPHAGGMMRYGIPEYRLPKATLDKEIDIIKSLGVKVMTGKSLGIHIRLEDLHKDFDAVYLAIGSWNATPMHIEGEKLDGVWLGIQFLEQVTRNAEINLGNNVIVIGGGNTAIDCARTALRKGAKSVKLVYRRTQEEMPAEPYEVEEALHEGVEMLFLMAPTKITSEG…	[FeFe] Group A1	[FeFe] Group A1	Evolving	Labile	1	[FeFe]-centre, 3 x [4Fe4S] clusters, 1 x [2Fe2S] cluster	None	0.290518	0.165855	0	0	1.03069	0	0	0.712424	0	0.995132	0	0	0	0
WP_010250208.1	MTEYLVTKNSNCKNCYKCIRHCPVKSLKFTDGQAHIVKDECVLCGECYVVCPQNAKQIRQDVEKAKQLISENDVYVSLAPSFVAWFHDKSIYDMEQALKKLGFKGADETAKGAFIVKKQYEKMIEEKRSKVIISSCCHSVNTLIQRHYTDAIPYLADVISPMLAHAQLIKKEHAGCKVAFIGPCISKKEEAEKYEGFVDVTLTFDELEEWLGMENIAIESTGTESEKGRTKSFPRSGGIIDSMDKNENYHYLVVDGMENCINALDNIDKGELDNCFIEMSACRGSCINGPVLKRKNHNIIGAILAVNENTGANDYTIAMPDRKSLKKEIRLEGVKKIMPGSSAIEEILKKMGKTSKEQELNCGSCGYDTCRDKAMAVLTGKADLTMCLPYLKEKAESFS…	[FeFe] Group C	[FeFe] Group C3	Sensory	Labile	3	[FeFe]-centre, 2 x [4Fe4S] clusters, PAS domain	Phosphatase, thioredoxin	0.962506	0.36975	1.18357	1.11646	1.03069	0.826529	1.61778	0	2.2185	0	0	0	0	0
WP_010250212.1	MNSKQYMTIDGIPVEINGEKNLLELIRKVGIKLPTFCYHSELSIYGACRMCMIENEWGGLDAACSTPPKAGMNIKTNTARLQKYRKMILELLLANHCRDCTTCSNNGKCKLQDLAMRYNINSVRFPNTASEPMVDDSSLCITRDQNKCILCGDCVRVCNEVQNVGAIDFGYRGSKMKICTAFDKPIAQSNCVGCGQCALACPTGAIVIKNNTDKVWKEIYDNNTKVTVQIAPAVRVALGKELGLNDGENAIGRIVAALRRMGFDEIYDTSTGADLTVLEESAELLKRIKDGNNDMPLFTSCCPAWVNFCEKHYPELLPNVSTCRSPMQMFASVIKEQNSNSSRRVVHVAVMPCTAKKFEAAREEFKVNGVPNVDYVISTQELIQMIKESGIIFTDLEPE…	[FeFe] Group A3	[FeFe] Group A3	Bifurcating	Labile	3	[FeFe]-centre, 3 x [4Fe4S] clusters, 1 x [2Fe2S] cluster	NADH dehydrogenase, thioredoxin	0.171781	0	0	0	1.03069	0	0	0	0	0	0	0	0	0
WP_010251944.1	MEMVNITIDSRKLQVPKNYTVLEAARSANIEIPTLCFLKDINEIGACRMCVVEIKGARSLQAACVYPVSEGLEIYTQSPAVREARKVTLELILSNHDKKCLTCVRSKNCELQTLAEELNIKDIRFEGESCNLPLDDFSPSIVRDPNKCVLCRRCVSMCKNVQQVSVIDTNERGFKSIVSSAFNKSLNEVPCTICGQCINVCPVGALKEKDDTDKVWSALANPDLHVVVQTAPAVRVALGEEFGMPIGSRVTSNMVAALRRLGFSKVFDTDTAADLTIMEEGTEVINRIKNGGKLPVITSCSPGWIKFCEHNYPEFLENLSTCKSPHEMFGAVLKSYYAQKEGIDPAKVFVVSIMPCTAKKFEAARPELAATGYADVDVVLTTRELARMIKEAGIDFTNV…	[FeFe] Group A3	[FeFe] Group A3	Bifurcating	Labile	4	[FeFe]-centre, 3 x [4Fe4S] clusters, 1 x [2Fe2S] cluster	NADH dehydrogenase, thioredoxin, thioredoxin	0.410325	0.60325	0	0	0	1.65306	0.808891	0	0	0	0	1.46124	1.22598	0.932283
WP_010293869.1	MFIFETQLKKVKHNVLKSVAILAKEDRLTTEELSKIHETIVDEDKPQYRCCVYKERVIVGQRAKLAAGYLPKGDDMNHLEDIKNRDQVIYVVEAACDKCPINKYTVTEACRGCVAHKCMEVCPTKAMVRVNGKAFINQELCKECGLCKKQCPYHAISEVLRPCKVVCPTGALSVAEDRRALIKEELCIECGACMKACPFGAISDKSLIEPVARRLANKENLYAVVAPAIAGQFGPNVTLGQIKAALINVGFKDMYEAACGADIVTINESNEFVHRMNNGSKYMTNSCCPAFLTYINKKFPKESINISSTVSPMIATGKYIKSIDPEAKIVFIGPCTAKKAEMRRDDVKDIIDYVLTFEEISALLDAFNMDPENCETLPADDASIYGRGFAAGGGLTSAI…	[FeFe] Group B	[FeFe] Group B	Evolving	Labile	1	[FeFe]-centre, 3 x [4Fe4S] clusters, 1 x [2Fe2S] cluster	None	0.171781	0	0	0	1.03069	0	0	0	0	0	0	0	0	0
WP_010296962.1	MINLKINNIEVSIENGKTILDACKKANIKVPTLCNMKMIDNTSQNCKGTCRVCMVELKEKGKLVPACSELVRDGMDITTNSTKVLKVRKTIVELLLSNHPNECLVCNRNENCELRKLAGELGISKNLYKGKKSEYKIDCSSPALIRDMNKCVLCRRCVTACDKVQNINILTPINRGFNTKIGTFFDNPINETKCTYCGQCVAVCPTGALTEVMDYEKIPRVVEDKEKFVVAQIAPAVRVALCEEFGVSSDIITTGKIVAALKMLNFNKVFDTNFSADLTIMEEAKEFINRFKEKNKLPLITSCCPAWIRFAEMNYKDNLKYISSCKSPQQMFGAIAKSYLVDKYKIKKENMVVVSIMPCIAKKYEAKRKELKGDVDIVITTRELAKLIRESSIDIINLK…	[FeFe] Group A3	[FeFe] Group A3	Bifurcating	Labile	3	[FeFe]-centre, 3 x [4Fe4S] clusters, 1 x [2Fe2S] cluster	NADH dehydrogenase, thioredoxin	0	0.24354	0	0	0	0	0	0	0	0	0	1.46124	0	0
WP_010537425.1	MEEKQITLQIDGHFITVPEGSTILEAACKIGINIPTLCHIDLKGTCIKNNPASCRICVVEVIGRRNLAPACATRCTEGMVVKTSTLRVMNARKVVAELILSDHPNDCLTCPKCGNCELQTLALRFNIREMPFNGGELSPRKREVTSSIVRNMDKCIFCRRCESVCNDVQTVGALGAIRRGFNTTIAPAFDRMMKDSECTYCGQCVAVCPVGALTERDYTNRLLDDLANPDKVVIVQTAPAVRAALGEEFGLPPGTLVTGKMVYALRELGFDYVFDTDFAADLTIMEEGSEILNRLTRYLDGDKSVRLPILTSCCPAWVNFFEHHFPDMLDIPSTARSPQQMFGSIAKSYWAEKMGIPREKLVVVSIMPCLAKKYECDRDEFKVNGIPDVDYSISTRELA…	[FeFe] Group A3	[FeFe] Group A3	Bifurcating	Labile	2	[FeFe]-centre, 3 x [4Fe4S] clusters, 1 x [2Fe2S] cluster	NADH dehydrogenase	0.137755	0.45083	0	0	0	0.826529	0	0	1.479	0	0	0	1.22598	0
WP_010665314.1	MVESGFYHALKIDSDKCFGCTHCMNVCPTAAIRIRDGVATIRPDWCVDCGECMRACPVDAIFVEQDDFDKIFQYKCRVALVPAVLIGQFPEKVTEAEIFSVMRELGFTHVFQTEHTAGIISRAMVETAREVEDKPVISSFCPAIVRLIQIKFPSLLDQVMRIKPPIDASAVYFRKRLEDEGIHPDDIGIFYITPCAAKIAAVKSPVGEEQSPIDGVINMQFVYNKIYKLIKSRHETSSISPGEMLPLLSPGSIKYSLTGGEASRMEGRCLAIDEIHNVIEFLEKLEHDEIEGVDFLELRACDQSCAGGVLVGGNRFLTTERLNKRARRFEGVSDIPGDIKAYSHFMANNMDIGLLEPRSMMALDEDMGEAMRKMQQVRHLMCFLPGIDCAACGAPNCQS…	[FeFe] Group C	[FeFe] Group C1	Sensory	Labile	2	[FeFe]-centre, 2 x [4Fe4S] clusters, PAS domain	Histidine kinase	0	0.36679	0	0	0	0	0	0	0.739501	0	0	1.46124	0	0
WP_010746116.1	MKEVMITINGKICTAPEGSTILEAARINNIEIPTLCFLKEINEIGACRMCVVEVKGARSLVTACVYPISEGMEINTNSKKVFDSRRVTLELILSTHERKCLSCIRSGNCELQKLCKEFNVADEDYFNGENCEYEFDDSAVHMVRNNNKCILCRRCVAACSKWQAVGVIGPNDRGFNTHIGSAYEQNLDDVPCISCGQCIVVCPTGAIHEKDQTQEVWEALEDPTKYVIVQTAPSIRVTLGEAFNMPIGTNVEGKMVAALRQIGFDKVFDTNVAADFTIMEEANEFLERVGNDGPFPMFTSCSPGWVKYLEAYHPELIPNLSTCKSPQQMFGALSKTWYAEKEGIDPKDIFVVGIMPCTAKKFEVTREDQAAAGYSDCDVALTTRELARMIDKAGVRFVE…	[FeFe] Group A3	[FeFe] Group A3	Bifurcating	Labile	3	[FeFe]-centre, 3 x [4Fe4S] clusters, 1 x [2Fe2S] cluster	NADH dehydrogenase, thioredoxin	0.673858	1.22464	1.18357	1.11646	1.03069	0	0	0.712424	2.2185	0.995132	1.04364	0	1.22598	1.86457
WP_010780462.1	MKEVMITINGKICTAPEGSTILEAVRINNIEIPTLCFLKEINEIGACRMCVVEVKGARSLVTACVYPVTEGMEITTNSKKVFDSRRVTLELILSTHERKCLSCIRSGNCELQKLCKEFNVADEDYFNGENCEYEFDDSAVHMVRNNNKCILCRRCVAACSKWQAVGVIGPNDRGFNTHIGSAYEQNLGDVPCISCGQCIVVCPTGAIHEKDQTQEVWDALEDPTKHVIVQTAPSIRVTLGEAFNMPIGTNVEGKMVAALRRIGFDRVFDTNVAADFTIMEEANEFLERVGNNGPFPMFTSCSPGWVKYCESYHPELIPNLSTCKSPQQMFGALAKTWYAEKEGIDPKDIFVVGIMPCTAKKFEVTREDEDAAGYSDCDVALTTRELARMIDKAGVRFVE…	[FeFe] Group A3	[FeFe] Group A3	Bifurcating	Labile	3	[FeFe]-centre, 3 x [4Fe4S] clusters, 1 x [2Fe2S] cluster	NADH dehydrogenase, thioredoxin	0.503859	0.327579	1.18357	0	1.03069	0	0.808891	0	0.739501	0	0	0	1.22598	0
WP_010935952.1	MVTLNIDNKQISVPEGTTIMQAAKQANINIPHLCYFEGLKSYSGCRVCVVEIEGEPRLATSCSRKVAEGMKVNTHSARVRRARRTILEILLANHPQDCFNCERNQNCDLLRLAFECGVKKLRFEESEKRVLPIDSTSPSIIRDPNKCIACGRCVRVCHDIQTVNAIGFINKGPDTMVATSMDRGMGNVACANCGQCILVCPVGAIKERSAVDAVWAAIADPTKHVVVQEAPSVRVSLGEELGLPAGTLVAKKMYAALRRLGFDAVFDTNFTADLTIMEEGSELVERVKDGGVLPQITSCCPGWVKFMEHYYPELAPNVSSAKSPQQMFGAVCKTYYAEKSGIDPKDIINVSVMPCTAKKFECQRPEMNDSGFKDVDYVLTTRELARMIKEAGLDFASLD…	[FeFe] Group A3	[FeFe] Group A3	Bifurcating	Labile	3	[FeFe]-centre, 3 x [4Fe4S] clusters, 1 x [2Fe2S] cluster	NADH dehydrogenase, thioredoxin	0.890573	0.12325	0	0	3.09206	0.826529	0	1.42485	0.739501	0	0	0	0	0
WP_010941450.1	MSKRITIDPITRIEGHLRIDVEVNGGQVAKAWSSAQMWRGIETILKGRDPQDAWSYAQRFCGVCTTVHAISSIRSVENALNVEVPLNAQYIRNIMIAQHSVQDHIVHFYHLSALDWVDIVSALKADPKKASSIAQSLSDWPGNSEKEFKAVQDKLKAFVASGQLGIFASGYWGHPAMKLPPEVNLIAVAHYLKALDYQRRASQAVAILGGKNPHVQNLVVGGVATAVNMENIATLNMERIAFLRTLMEETREFVQKVYYPDLVAIASFYKEWFKYGAGVTNYLAVPEFAEDTRNTKFGLPGGTIYGGDLGTFKAITTHQDAALIQGVTEGVAHAWYEGSDSLHPWEGETKPQYTDFQENGKYTWCKSPRYNGKPMQVGPPAQVMAAYATGHPKVKKLVD…	[NiFe] Group 1c	[NiFe] Group 1c	Anaerobic Uptake	Sensitive	4	[NiFe]-centre, 2 x [4Fe4S] clusters, 1 x [3Fe4S] cluster	[FeS] protein, TM subunit	0	0.36679	0	0	0	0	0	0	0.739501	0	0	1.46124	0	0
WP_011341336.1	MSMMNITIDGKATQVPAGSTILDAAKKLDVHIPTLCFLQMDEMKFNNMTASCRICVVEVEKRRNLAPACATPVMDGMVVKTNTIRVLNARRSVLELMLSDHPKDCLVCAKSGNCELQDLAEAFDIREIGVSGAMSTYRRDASPAIIRDMDKCILCRRCETMCNDVQTCGILSGVDRGFNAVVAPPFEMNLEDSACTFCGQCAAVCPVGALVERDHTWDVVTALADPEKVTVVQTAPAVRAALGEEFGIEAGTSVTGKMVAALRQIGFDHVFDTDFAADLTIMEEGSEFLDRLTRHLDGDTSVKLPIMTSCCPAWVKFFEHQFPDLLDVPSTAKSPMQMFGAVAKSYYAELLGIPREKMVVVSIMPCLAKKYECSRPEFMVDGNPDVDITLSTRELARLI…	[FeFe] Group A3	[FeFe] Group A3	Bifurcating	Labile	4	[FeFe]-centre, 3 x [4Fe4S] clusters, 1 x [2Fe2S] cluster	NADH dehydrogenase, thioredoxin, thioredoxin	0.118737	0	0	0	0	0	0	0.712424	0	0	0	0	0	0
WP_011366599.1	MNGQQNVIRIDSDICTGCGRCKDVCPVGAVEGVQGTPHSIREDVCVLCGQCVQQCSAFASFYEQHPACIAEKKRERGLFVSEAAPLFAAWHTGDAPRVAGRLAEGCHSMVQCAPAVRAAIGEEFGMPAGALTPGRLAAALRRLGFDRVYDTNFAADLTIMEEGSELLQRMEGAGPLPMFTSCCPAWVRYAEQQFPDLLEHLSSCKSPQQMAGAVFKSYGAQLDGVDPRQVFSVAVMPCTCKKAEAQRPGMEHDGVRDVDAVLTTGELAAMLRQAHIDFAALPDEPFDRPLGSYSGAGNIFGLTGGVMEAALRTAYELVTGEPVPCTELVYVRGGEGIRHATLTMDGRTFRVAVVAGLQHVRPLLEAVRAGTCDVNFVEVMCCPQGCISGGGQPKVLLPF…	[FeFe] Group A4	[FeFe] Group A4	Evolving	Labile	3	[FeFe]-centre, 2 x [4Fe4S] clusters	FeS protein, FeS protein	0	0.204329	0	0	0	0	0	0	0	0	0	0	1.22598	0
WP_011388063.1	MSIQPTVTIDPELCTGCGRCVETCPVQAIAGSRGKAHEIEAAACVSCGRCVATCAAFDSIFDAFPTPRPVRLKRRGLPGSLKEPLFAAHDPSRIEAVRKAFATPKRMTVMQVDTMACVALAEDFGLPPGSLSPLKIASAARQLGFDRVYRTSFPAGLAVLETAHEMAARLANGGNLPVINSSCPAVVAFLERRYPELLHYLSTVKSPHQIAGALYNSYLADAANLAPANIHKVSVVACLSHKAEAERPEMMTCGCPDIDTVLTARELAILIKDAGIDVPLLGDGEFDNDFPEIEGLDTLYCAPGDVSRAVLGAGRWFLGQGEGVGAPAGETVEVLDEATRLTRLAYPGGTLQALTVAGFDKAVPYLEAIKAGRNAFQFLEIASCPQGCASGAGLPKVLL…	[FeFe] Group A4	[FeFe] Group A4	Evolving	Labile	3	[FeFe]-centre, 2 x [4Fe4S] clusters	FeS protein, FeS protein	0	0.34788	0	0	0	0	0	0	0	0	2.08728	0	0	0
WP_011393219.1	MSTVKLTIDNIPVEVEAGTTILKAAEEAGIHIPTLCYLEGINEIGACRVCVVEVEGARNLMASCVAPVAEGMVVKTNSPRVRMARRLNVELLLSNHEMECPTCIRNLNCELQSLARGLGIRQVRFKGKKSEHPVDDSTPALVREPDKCILCRRCVAVCEKVQGVMAIAPLGRGFDTVIAPAFQEKLVDIACVECGQCTLVCPVGALYEKDYTSEVWAALADPEKFVVVQTAPATRVSIGQEFGLAPGSINTGQMVAALRRLGFDRVFDTDFSADLTIMEEGSEFIERFTKDGPLPLITSCSPGWIKFMEHFYPELIPNVSTCKSPQQMFGAVAKTYYARKAGVDPARMVVVSIMPCTAKKFECQRPEMRDSGYQDVDYVLTTRELARMIREAGIDFKNL…	[FeFe] Group A3	[FeFe] Group A3	Bifurcating	Labile	3	[FeFe]-centre, 3 x [4Fe4S] clusters, 1 x [2Fe2S] cluster	NADH dehydrogenase, thioredoxin	0	0.398921	0	0	0	0	0	0	0	0	0	1.46124	0	0.932283
WP_011417004.1	MEEHMSSINLTVNNIDVEVEAGATLYQAAQKAGVNIPTLCAWFDKDHTPGACRVCVVEVEGMPSLAASCAYPAQNGMKVFTNSDKVRQARKMIVELILASHPQECNFCVRNGNCELQKVAEMVGVKNIRYDSEEFDRDRELDTSSPAIVRDSSKCINCRRCVTVCESIQTVAALSPMNRGYESTVSPAFNLPLNETNCVNCGQCVMACPVGALYEKDQVDEVWKALQDPTRHVVVQEAPAIRAALGEEFGMPPGSLVTGKMIAALRRLGFDKVFDTNFTADLTIIEEGNELLKRVKEGGTLPMITSCSPGWIKFCEHFYPDLLGHLSTCKSPQQMFGALAKTYYAQVSGIDPANIFSVSIMPCTAKKYEAQRPEMKSSGYQDVDVVLTTRELARMIKEA…	[FeFe] Group A3	[FeFe] Group A3	Bifurcating	Labile	3	[FeFe]-centre, 3 x [4Fe4S] clusters, 1 x [2Fe2S] cluster	NADH dehydrogenase, thioredoxin	0	0.15538	0	0	0	0	0	0	0	0	0	0	0	0.932283
WP_011591981.1	MSKHLATTIRVAIEKDNPSICRDEEKCIKCGSCKNICTDYIGVNGHYSLEKTNDIAVCINCGQCANVCPTSSITEVFDYKKVEDAINDKDKIVIVSTSPAVRVSLGEEFNMDDGSFVQGKMIALLRKLGFKYVLDTNFAADMTIVEEASELVERITKNNKPLPQFTSCCPAWIKYAETFHPEILDHISTSKSPIGMQGPTIKTYFAKNMGIDPSKIINVALTPCTAKKFEIKREEMNASGRYYGIEDMRDMDYVITTREVAIWAKEKGIDFNSLEDSNFDKLMGEASGAGVIFANTGGVMEAALRTAYKYITKKEPPKDFYDLEAVRGMEDIREASFKINDLDINVAVIYGTENASKFISKMKDSDKKYHFVEVMTCPGGCIGGGGQPKDKNLQGDKLR…	[FeFe] Group A1	[FeFe] Group A1	Evolving	Labile	1	[FeFe]-centre, 2 x [4Fe4S] clusters	None	0.332078	1.47321	1.18357	0	0	0	0.808891	0	1.479	0.995132	0	1.46124	4.9039	0
WP_011640436.1	MVNLTIDGIKVSVPEGSTILQAASEVGIKIPTLCFHPDQSIKANCRVCVCEVEGNRLLQAACAMPVFEGMVVKTRTPKVLDARKTILELILSNHPQDCLNCIRNGNCELQDLAQEYCIRENPFEYKVRGFAKDFSTPSLFRDQDKCILCRRCIEACSVIQSVNALGMEGRGYNSMVVPTLGKALIDSPCVMCGQCIHACPVGAIGEREQIDEFLAAVANPDKVVITQIAPAVRVAIAEEIGMMTGELPMGTFVQGLRQIGFDHVLHTNFTADLTILEEGNELLKRLKEGGTLPMFTSCSPGWINFCETFYPDLLDNLSTCKSPQQMFGALAKTYWAEKMGIDPSKIYSVSIMPCVAKKFEAARPEMNDSGYQDVDLVLTTREIGRLFRMSGLDFSKLPA…	[FeFe] Group A3	[FeFe] Group A3	Bifurcating	Labile	3	[FeFe]-centre, 3 x [4Fe4S] clusters, 1 x [2Fe2S] cluster	NADH dehydrogenase, thioredoxin	0.763461	1.0234	0	2.23292	0	0.826529	0.808891	0.712424	1.479	0	0	0	0	4.66141
WP_011697714.1	MKMISLMIDKQNVSVPEGSTILQAAGKIGVRIPTLCYLKDINVIGACRICMVQVQGARTMMAACVTPVTEGMIVRTNTPEVIAARRVVLELILSDHPMECLTCVRNQNCELQRLAEEFNIKGIRFDGARTEYGIDDSSPAIQRDPRKCILCRRCISVCSEVQGVKALTTGHRGFNTLIAPAFNERLANVECVQCGQCSLVCPTGAIHEVDDTEKVWAALADPKKHVVVQTAPATRVQVGETMGAAPGSIVTGQMVAGLRRLGFDKVFDTDFTADLTILEEGNELLQRLQNGGALPMITSCSPGWIKFAEHFYPELLPHLSTCKSPQQMFGALAKTYYAQKAGIDPSDVFVVSVMPCTAKKFECIRPEMRSSGYQDVDVVLTSRELGRMFKQAGLSMENL…	[FeFe] Group A3	[FeFe] Group A3	Bifurcating	Labile	3	[FeFe]-centre, 3 x [4Fe4S] clusters, 1 x [2Fe2S] cluster	NADH dehydrogenase, thioredoxin	0.137755	0.652936	0	0	0	0.826529	0	0	0	0.995132	0	2.92248	0	0
WP_011877997.1	MSGKITINGQIIDFTDEKNILAVARKVGIDIPTLCYHPELTIAGACRLCVVEIERMGVQASCSTAPTDGMVVYTNSEKVNRVRKMVLELLLANHDRECTTCDSSGACKLQKYANDYGIKRLRYPNRTTMAPLDTSSLSIVRDPNKCILCGLCVRVCKEKQGIGVWDFKNRGSRTDIVAAMDQPLSESACINCGQCIAVCPTGALTSNSSSIQEIWAAIRDPKKTVVCQIAPAPRAALGEEFGLGSVDVTKKVVTALRKIGFDKVFDTVFTADMTTIEESNEFLSRLVKGENLPLFTSCCPGWVKYAEEFHPELLSNLSSCRSPQQMFGAVLKKKYAKELGIAPQDMFVVSVMPCTAKKYEAKRPEFTTEGAYDVDAVLTTVEAARMIKEAGIIFNTLEE…	[FeFe] Group A3	[FeFe] Group A3	Bifurcating	Labile	3	[FeFe]-centre, 3 x [4Fe4S] clusters, 2 x [2Fe2S] cluster	NADH dehydrogenase, thioredoxin	0.137755	0	0	0	0	0.826529	0	0	0	0	0	0	0	0
WP_011938839.1	MSTRITLDPITRIEGHLRIDVEVNGGKVSNAWSSAQMWRGIEVILKGRPPEDAWSFAQRFCGVCTTVHAISSIRSVEHALKVEVPLNAQYIRNIMIAQHSVQDHIVHFYHLSALDWVDIVSALKADPKKTAQVAQSISDWPGNSEKEFKAVQDKLKSFVAGGKLGIFASGYWGHPAMKLPPEVNLLAVAHYLKALDYQRKAAQAVAILGGKNPHVQNLVVGGVATAINMENLATLNMERLVYLKTLMEETRDFVQKVYYPDMLAIASAYKDWFKYGAGVTNYLAVPEFPEDTRNTKFALNGGIITAGNLAAMRPVKDHHDEYLINNVKESVAHAWYEGTSSLHPWEGETKPNYTDFKENEKYSWCKAPRLDGKPVQVGPPAQIFAAYAAGNPKVKKLVD…	[NiFe] Group 1c	[NiFe] Group 1c	Anaerobic Uptake	Sensitive	4	[NiFe]-centre, 2 x [4Fe4S] clusters, 1 x [3Fe4S] cluster	[FeS] protein, TM subunit	0.186077	0.857265	0	1.11646	0	0	0	0	0	0.995132	0	2.92248	1.22598	0
WP_012003383.1	MASVLVEINGKQHQVPSGATILEACNLAGVYIPTLCNHPRLEPTGACRVCVIEVEGARNLQPACATKVQDGMKIKTKTDRVEKAVKFNLALLLSRHPKDCMTCEVNGRCEFQDLIYRYDIQDLFPSEEKTSTVYDDSSPSIIRDLEKCVVCGRCVRACSELQGMDIYSMVDRGFETLPQTAFEMPVYETDCIACGQCSAFCPVGAITENSNVRKVLEELERHDKVLVVQTAPATRVALGEEFGLEPGSISTGKMVAALRKLGFDYVFDTNFAADLTIMEEGSEFLERLKNGGPFPMFTSCCPAWVNMAEKLYPQFLKNLSSAKSPHQMLGPLVKTYFAKKKGIDPENILVVSIMPCTAKKDDIIRPQHMVNGMPGVDIVLTTRELGKLIKMKKIPYASL…	[FeFe] Group A1	[FeFe] Group A1	Evolving	Labile	1	[FeFe]-centre, 3 x [4Fe4S] clusters, 1 x [2Fe2S] cluster	None	0.197262	0	1.18357	0	0	0	0	0	0	0	0	0	0	0
WP_012158849.1	MKGAMIVDGRKVEFDREKNVLEVVRKAGINLPTFCYHSELSIYGACRMCIVEDERGNTFASCSQLPSDGMKIFTNTPKIRKYRKTILEMILANHERDCTACDRTGICELQDLAIRFGIKDIRFDETRKHLPIDKSSLSIVRNPNKCILCGDCVRVCEEMQGVGALSFAYRGSSMTVTPAFNRDIAEVNCVNCGQCRNVCPTGAIIIKNENDRVWEVVNDRSKRVIAQVAPAVRVALGEEFGLEPGEVTIGKIVAALKAIGIDEVYDTAFAADMTVIEESKEFMERLSLGEDLPLFTSCCPGWVKFAENKFPDMMDHVSSCKSPQQMFGAVLKEYYKNEKNNAEGKETVVISVMPCTAKKAEAAREEFEQEGIRDVDFVITTQELALLIKEAGIIFHQLE…	[FeFe] Group A3	[FeFe] Group A3	Bifurcating	Labile	3	[FeFe]-centre, 3 x [4Fe4S] clusters, 1 x [2Fe2S] cluster	NADH dehydrogenase, thioredoxin	0	0.329321	0	0	0	0	0	0	0	0	1.04364	0	0	0.932283
WP_012208968.1	MKVKINNREYEFDHEISILDATKKAHIKIPTLCYSEKLEPFGSCRLCSVEIKGERTLKPACVTKITDGMEIFTHSQRVRKTRKTIIELIIASHGINCNLNCLTCSKSGSCEIKEVAEEIGVTEIRVPPISNGLPEDRSSYSVVREPQKCIVCNRCVRKCSEVQSVNILTIANRGPDTYVTTFMDKGMGNVDCTNCGQCILECPTGALHEVYQMDQVWTALSDESKYVIVQTAPAVRVAIAEEFDAEPGKIATKQMVAGLRLLGFDKVFDTNFAADLTIMEEANEFIERFKNNGKLPLFTSCSPGWVKFLEHNYPEFIDNLSSCKSPQQMFGAIAKTYYANKLGISKEDMVVVSVMPCTAKKFERVRPEIKGDVDYVLTTRELAKMFKLAGIDLLNVPPE…	[FeFe] Group A3	[FeFe] Group A3	Bifurcating	Labile	3	[FeFe]-centre, 3 x [4Fe4S] clusters, 1 x [2Fe2S] cluster	NADH dehydrogenase, thioredoxin	0	0.204329	0	0	0	0	0	0	0	0	0	0	1.22598	0
WP_012301316.1	MERFMEQQREMTRRAFFKMMAGLGLAGWAVTAGGCLRPAELPAGVEDLPPYHHRVASAWPAQVRGCVPIDPVSPSLVQDHRKCNLCGQCLDVCRNTQSVVGYYDLPLVDEIICINCGQCALVCPTGAISERDDTEKVWQALEDPGRFVVVQTAPATRVSLGEEFGLPPGTWVAGKQVAALRRLGFDAVWDTNFTADLTIMEEATELIKRIKGELPGHPLPLLTSCSPGWVKFCEYFYPNLLPHMSSCKSPQQMFGALAKTYYAEKKNIDPEKIFSVSIMPCTAKKFEAQRPEMNASGLYRGTPSIRDVDAVLTTRELARMLKQKGIDLAGLPEEDYDPLMGKCTGGAIIFGATGGVMEAAVRTAFFFITGNEPPSDLLNLTPVRGLEGVKEGALDVPGV…	[FeFe] Group A3	[FeFe] Group A3	Bifurcating	Labile	3	[FeFe]-centre, 2 x [4Fe4S] clusters	NADH dehydrogenase, thioredoxin	0.758569	0	1.18357	1.11646	0	0.826529	0	1.42485	0	0	0	0	0	0
WP_012301552.1	MNPVSEITKLRRNILTRVARWALNKPLDEQPTDEVIRNMVMEMIPDGPARYRCCIYKERAVAEAQIRIITGLEASEQVVTVIPEACNGCSLNKYFVTDACQNCVAHSCRNSCPKKAISVLQNRAYIDNDSCVECGICAKNCPYYAIVEISRPCERSCDMGAIKVDECRRAVIDLDKCVSCGMCVAVCPFGAITDTSKILDVAKALRVKKQPMVAIVAPSLPGQFGPKATPGHIKTAILKLGFDGVVEAALGADVVAKQEAEEIRNHPESKLMTNSCCPAWAKAVTIKLPEIAGKISDTLSPMRVTGRLVKERYANKVTTVFIGPCIAKKAEATLGGEIDMALTFEELSALFAASDIDPANHVPADMNDASPYGRLFAKAGGVSAAVTRHLPDVSMEVLQ…	[FeFe] Group B	[FeFe] Group B	Evolving	Labile	1	[FeFe]-centre, 3 x [4Fe4S] clusters, 1 x [2Fe2S] cluster	None	0.197262	0.34788	1.18357	0	0	0	0	0	0	0	2.08728	0	0	0
WP_012302431.1	MAVTLTIDGRPVTVEPGTTVLDAARQLGIAIPTLCYLKQLNHRAGACRMCIVEVEGARTYLASCTLPATEGMVVRTGTPGVREARRMILELMLSDHPNECLLCIRSGSCELQAAANLMGLREIRFQRMSRTLYKKDDSSPAIIREPQKCIYCRRCVTVCAEVQTVHAIGPQLRGFATVIAPPYNLPLGDSVCVHCGQCALVCPVGAIYERDDTGAVWAALADPAKHVVVQTAPATRVTLGEAFGLPPGTPVTGKMVAALRRLGFDRVFDTDFTADLTIVEEGNELIHRLTKGGPLPMITSCSPGWIKFIEHFYPEFLPHLSTAKSPQQMFGALAKTYYAEQAGIDPKDMVVVSIMPCTAKKFEAGRPEMNASGYRDVDMVLTTRELVRMLHEACIDLNN…	[FeFe] Group A3	[FeFe] Group A3	Bifurcating	Labile	3	[FeFe]-centre, 3 x [4Fe4S] clusters, 1 x [2Fe2S] cluster	NADH dehydrogenase, thioredoxin	0	0.409396	0	0	0	0	0	0	0	0.995132	0	1.46124	0	0
WP_012447299.1	MRKFENKIQESKYEVLREVSKAAFEGTLDKELIHIPKRIDLEPKIRCCIHKERVVTYERIKVALGGNKENNNIIEVIDEACDECFDTRYVITEACRGCLANHCVSYCPVGAIEFVQHKAKIDGQKCIECGKCKDACPYNAIVDVMRPCKKACGVNAINIEVNKKATIDNDKCIQCGACVYQCPFGAIMDKSYITEVIELLKNADENNKVYAIIAPAIASQFTYASIGQVITGIKKLGFHDVIEVALGADMVAVKETHEYAQTIENKKTITSSCCPSFVQYILNEYPELKDNISSMISPMIAISKLIKDLDPKSKVVFIGPCTAKKMEIQQKDLQGITDYALTFEELAAMIDSKGLELQDQEESLLDNASYYGRIFARTGGISQAIENIIKEEKLDVPFD…	[FeFe] Group B	[FeFe] Group B	Evolving	Labile	1	[FeFe]-centre, 3 x [4Fe4S] clusters, 1 x [2Fe2S] cluster	None	0	0.17394	0	0	0	0	0	0	0	0	1.04364	0	0	0
WP_012447302.1	MKFISFSEEDCVNCYRCIRACNTKAISVFGDPRENDEKLCISCGECYVACERNGLTIKDKVKEVKDALSSNKKVIASLAPSFPGAFSIKEGGKIVTALKELGFYAVEETAVGADVVINAYENFTNDAKQKNLISTSCPSTVYLVEKYYPELVNYLIPVVSPMIAHGKMIREKYGEDAYIVFIGPCIAKKVEAHESQYNGIINSVLTFVELQKWFKDNNLDLKNQSPEPFDEKANDKGKLIPCNIKLSNEKNENYEKIVVTGVERSKEILNSLKKGELSGIFLEILSCPGGCIDGTGMLKEAPSYYVRKKYVKDYIAKKCSDDVKIENKFAQKIDIERHVSSKKVKKYRHPKEQIDEVLNSIGKNKKEDELNCNACGYVTCREFAESILRKNAHVNMCHP…	[FeFe] Group C	[FeFe] Group C3	Sensory	Labile	2	[FeFe]-centre, 2 x [4Fe4S] clusters, PAS domain	Phosphatase	0	0.24354	0	0	0	0	0	0	0	0	0	1.46124	0	0
WP_012543947.1	MDKVTVTIDGITLEVPSNYTVLQACREAGIDIPTLCYAEVINEIGSCRLCVVEVDGVRNLPASCIYPVQNGMNIRTNTPRVREARRVNLELILSNHDRSCLTCIRNTKCELQDLAERFGITDIEFQGENVNYPLDDASPAIVRNPNKCVLCRRCIAECQEVQNVFAIGAVNRGFDTLVSAPFYVSLNDSPCISCGQCITACPTGALYEKDHIQRVYRALADKRKHVVVQTAPAVRVALGEEFGMPVGSIVTGKMVAALRRLGFEVVFDTDFGADLTIMEEGSELIERLKYGGKLPMITSCSPGWINFCEKYYPDFVENLSTCKSPHMMLGALIKTYYAEKMGWNPEDVYVVSVMPCTAKKVEIERPENMHDGLQDVDAVLTTRELARMIKEAGIDFVNL…	[FeFe] Group A3	[FeFe] Group A3	Bifurcating	Labile	4	[FeFe]-centre, 3 x [4Fe4S] clusters, 1 x [2Fe2S] cluster	NADH dehydrogenase, thioredoxin, thioredoxin	0.447291	0	0	0	1.03069	1.65306	0	0	0	0	0	0	0	0
WP_012635137.1	MTVLKIKETDCQDCYKCVRFCPVKAIKIKDGHASIIGERCLGDGGCVEICPQKAKEVRQDWPVVKDWLEKGEEIIVSLAPSYLVAYRNKSPQNLVNTLYSLGFKKVEETAIWADYVARAHQELLTMDEKNKNILREKGIFRVKKPVITSSCPGVVKLIDYYYPHLKEHLAPVLSPMMAHGKYLKEQAPERKVVFVGPCAAKKEEATRAGYIDAVLTFTEIQELIKSEGNEVEVKQDITPELATEKGAFFPASGGFYKTAGLKVTEIDNKFLTVTGIEKLQELFSSFEKVQNLELIEAMACEGGCLAGAFFPDSASLWERRQKLLERIEQQERKKIVGEQNLEQNVKLTFMNLNLDNKTNDPEEPDEEDIKKILAKTGKYTEQDELNCGACGYNTCREKA…	[FeFe] Group C	[FeFe] Group C3	Sensory	Labile	2	[FeFe]-centre, 2 x [4Fe4S] clusters, PAS domain	Phosphatase	0.343562	1.51343	0	0	2.06137	0	0	0	0.739501	0	1.04364	1.46124	4.9039	0.932283
WP_012739633.1	MLSNDATIQNIKHEILYEVAKLAYAGRFEEEKDELAYKMFPGPKARFRCCVYKEREIARQRIRLAEGKCPTESDHPGANNIIQVIEAACADCPLSHYIVTDNCRKCMMKACQQACKFGAVSMTRDRAYIDPDKCKECGMCAKACPYNAIADLIRPCKKICPANAITMDENGICEIDENKCIQCGQCIHACPFGAIGSKTDIVDVIKAIVDGKKVVAMVAPAVEGQFGDTITMSSIRTACKKLGFNDMYEVGLGGDLTAQAEAEEWLEAAKEGKKLTTSCCPAFVNLIKKQYPELAEHISTTISPMFALSRLLKSEDPDTITVFIGPCIAKKNEKQEYKGQGNADFVLTLGEFRAMMRAKEVVLEPEENSDQQASIYGKRFGNGGGVSAAVAQCMREAGA…	[FeFe] Group B	[FeFe] Group B	Evolving	Labile	1	[FeFe]-centre, 3 x [4Fe4S] clusters, 1 x [2Fe2S] cluster	None	0.357858	0	0	1.11646	1.03069	0	0	0	0	0	0	0	0	0
WP_012744686.1	MPVTVTINGKQYQVEENRTVLEVCREIGIEIPTLCYHPALSIVGACRVCMVEIEGARNLSPACATYVTDGMVIRTNTERVNRSVRFNLALLLSSHPNDCMTCDANGRCEFQDLIYRYDIKDMFPKDLRNIPYDTSSPSLFRDMNKCILCGRCGRACKELQGLSILSVAGRGYHSIPVPALGAPIAATDCINCGQCATVCPVGAITERMDFRRVAEELYKHEKVLVVQTAPAVRVALGEEFGEEPGTISTGKMVAALRKLGFDYVFDTDFAADLTIMEEGSELLQRIKEGGKFPMFTSCCPGWVNLMEKLYPEFRENLSTAKSPHEMLGALIKTYFAKKIGKDPKDIFVVSVMPCTAKKDEAERETLLVRGHVAVDAVITTRELGKLIKMKKIPYESLPE…	[FeFe] Group A1	[FeFe] Group A1	Evolving	Labile	1	[FeFe]-centre, 3 x [4Fe4S] clusters, 1 x [2Fe2S] cluster	None	0.186077	0	0	1.11646	0	0	0	0	0	0	0	0	0	0
WP_012774796.1	MSRITLDPITRIEGHLRIDVEANGGKVTNAWSSAQMWRGIEVILKGRAPEDAWSFVQRFCGVCTTVHAISSIRAVEHALNVEVPLNAQYIRNIMIAQHSVQDHIVHFYHLSALDWVDIVSALSADPKKTAQIAQSISDWPGNSEKEFKAVQDKLKAFVAGGKLGIFASGYWGHPAMKLSPEVNLMAVAHYLKALDYQRKASQATAILGGKNPHIQNLVVGGVATAINTENIATLNMERLIYLRTLMEETRDFVQKVYYPDLLAIAGAYKEWFKYGAGVTNYMAVPEFPEDTKNGKFSLPGGVVMGGNIAGIRPVKDHRDEYLIKNIKENVTHAWYEGNGTLHPWEGETKPDYTDFKENGKYSWCKAPTLDGKPVQVGPPAQIMAAYAAGNPKVKKLVDG…	[NiFe] Group 1c	[NiFe] Group 1c	Anaerobic Uptake	Sensitive	4	[NiFe]-centre, 2 x [4Fe4S] clusters, 1 x [3Fe4S] cluster	[FeS] protein, TM subunit	0	0.93495	0	0	0	0	0	0	0	0	0	4.38373	1.22598	0
WP_012803120.1	MGKSTVIPFGPQHPVLPEPLHLDLVVEDETVVEAIPQIGFIHRGLERLTETKDYNQFIYVAERICGICAFGHSMGYAETIEHLMGIEVPPRAQYLRVIMHEMSRIHSHVLWLGLAADAFGFESLFMHCWRLRERVLDLFEAMTGGRVIFSANLVGGMVRDQDAQILATVKERLEGIKADYQQISDTFLKDSSVKGRLVGVGYISPEDAAAWSMTGPFARASAVNNDARCKGSAAYAALPNFEPILSHDGDCYARVEVRIREVLQSIDIICQLIDTIPAGEVLTKVKGSPAAGSQACHALEQPRGECYYYASGNGTKFLSRMRMRTPTSANLAGMAMALKGCDLADVNMIVLTIDPCISCSER	[NiFe] Group 4e	[NiFe] Group 4e	Evolving	Sensitive	6	[NiFe]-centre, 1 x [4Fe4S] clusters	NuoL, NuoH, NuoC, [FeS] protein	0	0.204329	0	0	0	0	0	0	0	0	0	0	1.22598	0
WP_012860094.1	MSQKLVNVTVDDIKVQVPEGTTILAAAKSAGVNIPTLCYLNLADFGCVNKTASCRVCVVEVEGRRNLAPSCATPVNEGMIVKTNTIKALNSRKIVLELLLSDHPKDCLVCQKSGECELQDLAHEFGIKEIAYEGKESTYRKDISKSIIRDMDKCIMCRRCETMCNEVQTVGALSGVNRGFDAVVAPAMEMDLNDSVCTYCGQCVAVCPTGALVERDATWDVLSALADPTKTVIVQTAPAVRVALGEEFGYAPGTSVTGKMVSSLRKLGFDRVFDTDFAADLTIMEEASELLDRLTRHLNGDTSVKLPILTSCCPAWVKFFEHNFNDLLDVPSTAKSPMQMFSAVAKNVFAKELNVDRKDLIVVSVMPCLAKKYEAGREEFSKDGDFDTDIVLSTRELAR…	[FeFe] Group A3	[FeFe] Group A3	Bifurcating	Labile	3	[FeFe]-centre, 3 x [4Fe4S] clusters, 1 x [2Fe2S] cluster	NADH dehydrogenase, thioredoxin	0.186077	0	0	1.11646	0	0	0	0	0	0	0	0	0	0
WP_012862886.1	MDEIKDADQIKNEVLQKTAEYAFKNILAEKAEDIPFEIISGIKPQFRCCVYREREIIRQRVRLSMGQLPRDAVYTELEPTQVVHVIPCACEGCPIVRFTVTDNCQNCLTKKCIKSCAFGAISATKKGAYIDKQLCKKCGKCVASCPYHAIVDIERPCKKSCPVDAIEIDENDIAIIDSTKCINCGLCINNCPFGAISDVSMMTNVINTLLTNDNVYAMIAPAIEGQFGPDASIGVIKNWIKKLGFKDVYEVALGADAVAYREAEELSENFKNGKKMTSSCCPSFVNLISKYYGNLVENISTTISPMVATARLIREKDPEAVTVFIGPCVTKKNEALSLYIKEVNYVITFEELAAMFAGKNIDLSAGECDENSATSYGKGFAKSGGVAAAVLKVLEEKGI…	[FeFe] Group B	[FeFe] Group B	Evolving	Labile	1	[FeFe]-centre, 3 x [4Fe4S] clusters, 1 x [2Fe2S] cluster	None	0.171781	0	0	0	1.03069	0	0	0	0	0	0	0	0	0
WP_012863017.1	MKHNLITLTIDHKTVEVPEGTTILAAAKSVGISIPTLCYLNLSDFGCVNTPSSCRMCLVEVEGRRNLAPACVTPASDKMTVSTNSVRALKTRKTMLELLLSDHPKDCLTCQKSGNCELQSLADKFSIRDIKLKGEQSAYRLDISKSLIRDMDKCIMCRRCETMCNEVQTVGVLSAINRGFESVIATAMEINLSDSVCTYCGQCAAVCPTGALVENDATWDVVKALGDPEKTVIVQTAPSVRAALGEEFGLEPGTLVTGKMVAALRGLGFDKVFDTDFGADLTIMEEASEFLDRLTRHLDGDTSVKLPILTSCCPAWVNFFEHNFSDLLDVPSTSKSPMQMFSAVVKNVYAQELGVDRKNLVVVSVMPCLAKKYEASRDEFSIGNDYDTDIVLSTRELAK…	[FeFe] Group A3	[FeFe] Group A3	Bifurcating	Labile	3	[FeFe]-centre, 3 x [4Fe4S] clusters, 1 x [2Fe2S] cluster	NADH dehydrogenase, thioredoxin	0.256492	0.12325	0	0	0	0.826529	0	0.712424	0.739501	0	0	0	0	0
WP_012939176.1	MSEAYLNSVRVNTRHCTGCLICVKDCLVQAIRVRNGKAVILSDRCIDCGECIRCCPTRAMEGWADPLTELKKYKVNIALATPSFYAQFDGNIAASVIWEGLRELGFDTVFDVALAGDYISDEMERYIAHYKGPFPLISSACPAVLRLIQTKYPELVKQVLPILAPAEAAAIYTRRETTKRLQLAPEQVGIWFISPCPAKGTNIHQSVDVAHTAVTGSFTIASIYGPLTQAIKHVQETRYEVPEATLGSSYSLSWGSWQGELESTGVTNALAAQGPEEVDELLEQISMAKLNDVRYACCYSCAGGCIGGPCVAVNKYVAAKNLRVRVERRRSREDGDRKSAMQRRRIIEDFPDSWRYIKPLEPRPHPPLARDFGEALEKMARLKELEKEFPQLDCGACGA…	[FeFe] Group C	[FeFe] Group C1	Sensory	Labile	2	[FeFe]-centre, 2 x [4Fe4S] clusters, PAS domain	Histidine kinase	0	0.17394	0	0	0	0	0	0	0	0	1.04364	0	0	0
WP_012994913.1	MDKVRVTIDGITVEVPSHYTVLEAAKEAGIDIPTLCYLKEINQIGACRICVVEIEGVRNLQTSCTYPVFDGMKVYTNTAKIREARKLNLELILSNHDRSCLTCIRNTNCELQSLSKKLGVNEIRFEGENIKYSIDNASPAIVRDPNKCVLCRRCVSVCSEVQNVFAIGMVNRGFKTMVAPSFGRSLKDSPCISCGQCIEVCPVGAIYEKDHTKRVYEALADEKKYVVAQTAPAVRVALGEEFGMPIGSIVTGKMVAALKRMGFDAVFDTDFAADLTIMEEGSELLERLKNGGKLPMITSCSPGWIAFCEKYYPEFIDNLSTCKSPHMMMGALVKSYYAEKEGLNPEDIYVVSIMPCTAKKLEIERPEMQHNGIKDVDAVLTTRELARMIKEMGIDFVNL…	[FeFe] Group A3	[FeFe] Group A3	Bifurcating	Labile	4	[FeFe]-centre, 3 x [4Fe4S] clusters, 1 x [2Fe2S] cluster	NADH dehydrogenase, thioredoxin, thioredoxin	1.30594	0.37827	2.36715	2.23292	0	0	3.23556	0	0	0	1.04364	0	1.22598	0
WP_013010514.1	MGKRITIDPITRIEGHLRIDFEVDGGKVSKAWSSAQMWRGIEKILIGRDPRDAWVFAQRFCGVCTTVHAISSIRSLENAYNVEVPLNAQLVRNIMIAQHSLQDHIVHFYHLSALDWVDIVSALSADPKKTAQIAQSLSNWHGNSVTEFKAVKERLTAFVQTGKLGIFGSGYWGHPAMKLSPEVNLMAAAHYLKALDYQKKAASAVAILGGKDPHIQNLCMGGVATAINMDNEATLNMERVALLRSLMEETRDFVKNVLYPDVLAIGSMYKEWFKYGRGVDNYLAIPEFPLDATMTKFDMSGGIIHDGDLKNFRLLKDHKDEALINGTTESTKHAWYEDGKPKNPFQGETEPKYSEFDPDGKYTWCKAPRLDGRAIQVGPVAQILASYAAGDKHVKTLVD…	[NiFe] Group 1c	[NiFe] Group 1c	Anaerobic Uptake	Sensitive	4	[NiFe]-centre, 2 x [4Fe4S] clusters, 1 x [3Fe4S] cluster	[FeS] protein, TM subunit	0.186077	0.642461	0	1.11646	0	0	0	0	0	0	0	2.92248	0	0.932283
WP_013120942.1	MITLSIDGQKVEVEPGTSILEAARLNGIYIPTLCYLKELNEIGACRVCLVEIKGARTLQPSCTYPVAQGMEVFTHSPRVIKARKLVLELYLSNHPFECLTCVRNQRCELQSLAERYHVRHLKVHGELKRYPIDDQSPAMVREPSKCVVCRRCIRVCKDVQEIGIYQLVERGFDTVASPAFKKSLAETPCIYCGQCLQLCPTAAIHEKEDLEAVWRALADPEKHVVIQTAPSIRGTLGEGFGMPAGSLVTGKMVAALKKLGFAKVFDDCFGADIVCIEEGAELIHRLENGGPLPQFTSCCPGWLRFALLFYPELIPHISSVKSPQQVFGALLKTYYAKQSGIDPKKIFSVSVMPCVAKKWERQRKIGTHDSGYQDVDVVLTTRELIQMLRSAGINLAELP…	[FeFe] Group A3	[FeFe] Group A3	Bifurcating	Labile	3	[FeFe]-centre, 3 x [4Fe4S] clusters, 1 x [2Fe2S] cluster	NADH dehydrogenase, thioredoxin	0	0.808327	0	0	0	0	0	0	0	2.9854	0	0	0	1.86457
WP_013121809.1	MSVVTTISEKCQRCYACVRNCPVKAIKVDRGQAKIIEERCIACGSCVRVCAQKAKKVASDISKAEYFLAVEKEVIAIVAPSFPAAFPEFPADNVLSGLYELGFHDVEEVSLGVQLTIPEYKKLIEKAEFPVISSFCPAVVGLIEKHYPDLIKYLAPIDTAMIACGKYIKKHRKKARVVFIGPCVAKKEEARLRGRGVIDAVLTFKELKKMFHEKGIDLKKIKSNPNILHNGKAKLFPLPGGLLANLGYKLDLSNQEFFNIEGRENCFEIIKNLSTGAIMPRFVDILFCNGCIDGPEIDSDVDLITRRNLVAAYARRFGEQAKISAAGLDLKTCFVDRHVDYPVPSEEEIKEILKLTYKIRPEDELNCGSCGYDTCREQAIAAYQGLAEIDMCFPYLLHK…	[FeFe] Group C	[FeFe] Group C3	Sensory	Labile	1	[FeFe]-centre, 2 x [4Fe4S] clusters, PAS domain	Fusion with transcriptional activator	0.790724	0.497566	1.18357	1.11646	0	0.826529	1.61778	0	0	2.9854	0	0	0	0
WP_013251691.1	MVRLTIDGREVEVEEHTTILDAARTAGVNIPTLCYLRDINEIGSCRVCAVEVEGIDQLVASCNNYVLDGMVVRTNSPKARAARKVNVELLLSRHKTACTSCVRSGNCTLQELANDLNIYYLDYAEHVPFVHWDKTYPLIRENHKCIDCMRCVQVCDKVQASRIWDATSRSTHRTVNVVGGRSFDDVDCTYCGQCITHCPTGALRERDDTERVFRALADPNVTTIVQVAPSVRTSWGDEFGLGADEGSLGRLVSALRPMGFDYIVNTDFSADLTIMEEGTELLAHMAREGDKDAAERLPMFTSCCPGWVRFVKAHYPQLVDHVSTSKSPQQMFGAVVKSYYADLLGLDPHGIFSVSIMPCVAKKAEADIECMNDACGDPDVDAVLTVREVTRMIRAEHVC…	[FeFe] Group A2	[FeFe] Group A2	Evolving	Labile	2	[FeFe]-centre, 3 x [4Fe4S] clusters, 1 x [2Fe2S] cluster	NADH-dependent glutamate synthase	0.357858	0	0	1.11646	1.03069	0	0	0	0	0	0	0	0	0
WP_013252233.1	MADTMRGVYTNLTKIRRDVFREVARVCYSLNDNPDGTDEDFDARFDELPFQILPGDVATYRESVFLERAIIGERIRLAMGLSLQGVDRPARISEGFANSEVGDLAYYEPPLINVIKFACNACKDNVYTVTDQCQGCLAHPCREICPKQAISFVDKRAHIDQDLCVQCGMCERTCPYHAIHHHVRPCAAACGMHAIGSDEHGRADIDYEKCVSCGQCLVNCPFGAIADKSQIGQVIWSILAGDEVIAAVAPSFVGQFGGKGNVGKLREAFKRLGFSGVEEVALGADLCTVQEADDFLDEVPDKLPFMGTSCCPAWSVMAKKEFPEHADCISMALTPMTLTARMIRTRHPNAKIVFVGPCAAKKLEAMRRSVRSEVDFVLTFEEMAGMMEARGIDYLALKD…	[FeFe] Group B	[FeFe] Group B	Evolving	Labile	1	[FeFe]-centre, 2 x [4Fe4S] clusters	None	1.18734	0.45083	2.36715	0	0	0	4.04446	0.712424	1.479	0	0	0	1.22598	0
WP_013275360.1	MKTLKINGREVAFSDEKNLLEVIRKAGIELPTFCYHSELSTYGACRMCLVEDKRGNLIAACSTPPREGMEIKTHTKRLLKQRRMTLELILAEHDRDCTTCGKNGDCKLRKLSHDLGVEEIRFGTKENYLPIDDSSEAIVRNPNKCILCGDCVRMCEEVQGIGVIGFAHRGAKAVVTPAFNKNLCEVECVDCGQCSAVCPTGAIVVKSHIDKVWDALNDDNKVVIAQIAPAVRVAFGEAFGLRPGESTEYLIVSALKAMGFDMVFDTCFAADLTVIEEGHEFLERLEKGENLPLFTSCCPAWVKFVEFNYPSFLNNLSSCRSPHQMFGSFTKNYYAKELGVSRENVYVVSIMPCTAKKAEAAREELGVDGNPDVDAVLTTRELIRMVREAGIVFKDLKEE…	[FeFe] Group A3	[FeFe] Group A3	Bifurcating	Labile	3	[FeFe]-centre, 3 x [4Fe4S] clusters, 1 x [2Fe2S] cluster	NADH dehydrogenase, thioredoxin	0.134815	0.434011	0	0	0	0	0.808891	0	0.739501	0	0	0	0	1.86457
WP_013275513.1	MEMVTLTIDGEKVQVPKGTTILEAARKIGKKIPTLCFLKEINEIGACRMCVVEVKGARALQASCVYPVSEGMEVFTNTPAVRESRKITLELLLSDHNLECPTCIRNLNCELQKLAEELGIKSIHFEGEKHRSIYDDFSPSIVRDTSKCVLCRRCVSTCHKVQGVGVISPNHRGFETMVAPVFDMSLADVACVNCGQCILACPVGALKEKDDTDRVWKALADPEKHVIVQIAPAVRVSLGEEFGLGRGAIVTKKIPAALRRMGFDRVFDTDFSADLTIMEEGHEFIERLQHGGKLPLITSCSPGWIKFCEHYYPEFLENLSTCKSPQQMFGAVAKTYYAQKVGIDPSKIFVVSIMPCTAKKYECQRPEMRSSGYQDVDVVLTTRELSRMLKEAGINLAAM…	[FeFe] Group A3	[FeFe] Group A3	Bifurcating	Labile	3	[FeFe]-centre, 3 x [4Fe4S] clusters, 1 x [2Fe2S] cluster	NADH dehydrogenase, thioredoxin	0.425334	0.748454	0	0	1.03069	0	0.808891	0.712424	0	0.995132	1.04364	0	2.45195	0
WP_013297601.1	MYFHSVTLDKDRCKGCTNCIKRCPTEAIRVRDGKAKIIKEKCIDCGECVRVCPYHAKIVVTDDTEMMKNYKYKIALPAPSLYGQFKDMTIGDILASLKSCGFDEVFEVAYAADIVSYITRTIVKIKNFKRPIISSACPAIVRLIQQRFPSLIDNILDIMPPVEVAGKIAKDEAKKKTGLNDEEIGVFFISPCAAKVTSVKNPIGIKKSYIDGVFSMHDIYSMILDNRRSRDKSVEHASSMIGVGWANAGGESYGTSLENCLFVDGIQNVINVLEEIELGKLNDIDFFEGLACIGGCVGGPLTVENNFVARNRIMKIKEKLNKEANIKKHLVADYREFMLNVELKKSDVLNLDDDIDKAIDKMKSIDEIYKNLPGLDCGSCGSPGCRALAEDIVKGYASE…	[FeFe] Group C	[FeFe] Group C1	Sensory	Labile	2	[FeFe]-centre, 2 x [4Fe4S] clusters, PAS domain	Histidine kinase	0	0.24354	0	0	0	0	0	0	0	0	0	1.46124	0	0
WP_013298247.1	MSVINFKEANCRNCYKCIRYCPVKAIKVNNEQAEIVDYMCIACGRCLNVCPQNAKTVRSDIEKVKAFIKKGDKVVFTIAPSYPALVGSGRAFKFLNALKSLGAEMIIETSVGAMFISKEYERYYNDLKYDNLITTSCPSINYLIEKYYPDLINCLVPVVSPMIAVGRVVKKVYGNEIKVVFIGPCLAKKVEMNDFSCEDAIDAVLTFEEIIEWLDGDGINIDSREEFTDCVDTMMPFKLYPIEGKTIDCMDVDLNLRKVVSVSSIDNVKDLLNDIRSGNLHGYWIEANACDGGCINGPAFGRSNSGVVKRKEEVINYSNTKANFINDISNMIDCSVDFTRKFINLSDKWKMPSENEIKNILSKIGKFTKEDELNCGACGYDTCREKAIAVFNGMAEPYM…	[FeFe] Group C	[FeFe] Group C3	Sensory	Labile	3	[FeFe]-centre, 2 x [4Fe4S] clusters, PAS domain	Phosphatase, thioredoxin	0.197262	0.15538	1.18357	0	0	0	0	0	0	0	0	0	0	0.932283
WP_013313426.1	MAKQAKTVTITINGTPLEVEEGTLLVDAASRADVEIPTLCYHEDLSPRGICGICLVKVNGEYVRSCITRVREGMEVVTSDPVIRETRRKILELILATHPDDCLKCIKHGKCELQDLAERLEVRSIPYDKYERGLPVDRTSPSIVRDMNKCIGCGRCIEVCHHVQSVGAIFFHNRGSHTIVANAAGQTMGTSVCVACGQCVVYCPVGALYEKEAVERVWEALADPEKVVVAQIAPAVRVALGEEFGMKPGELVIGKIYAALRRLGVDYVFDTNFSADLTIMEEGTEFLHRLEKGERLPLITSCSPGWIKFAETYYPDLLPHLSTCKSPQQMMGAVVKTYFAQAKGIPPSRIVSLSIMPCTAKKFEAQREEMRDSGFWDVDIVLTTRELARMIRQAGIRFD…	[FeFe] Group A3	[FeFe] Group A3	Bifurcating	Labile	4	[FeFe]-centre, 3 x [4Fe4S] clusters, 1 x [2Fe2S] cluster	NADH dehydrogenase, thioredoxin, thioredoxin	0.323832	0	0	1.11646	0	0.826529	0	0	0	0	0	0	0	0
WP_013314414.1	MVYSQPLIDVDPARCVSCHRCIAVCPVKYANDGSGEVVEVRPELCIGCGECLKACTHGARRVVDDLEEALDALRSGKKVVAFVAPAAAAHFGEQHLRLNGWLKAMGARAVFDVSFGAELTIASYVHYLKTERPGFLIAQPCPAVVSYLELYQPELLPHLAPVDSPMVHVMKMVKAFYPEYRDHEFLVVSPCVAKKREFLTVGVGTYNVTMRRLVDYFEQEGVDLSTCPEEEFDNDPAERAVWFSNPGGLLATLAREMPEVVSRTRKIEGPQVLYPYFKEIPQALERGSAPLLLDCLNCELGCNGGPGTRFQTGPRDVLEEAVRRRADRMMASYRKRGLLPGGGKRALSRLLSRYWRPHLYRRSYEDRSQMVDLPVLTDEVKARIFRELGKTSPVDERNC…	[FeFe] Group C	[FeFe] Group C2	Sensory	Labile	1	[FeFe]-centre, 2 x [4Fe4S] clusters, PAS domain	Fusion with methyl-accepting chemotaxis protein	0.186077	0.15538	0	1.11646	0	0	0	0	0	0	0	0	0	0.932283
WP_013379183.1	MTMSDVTFKINNMEITVPEGITVLEAARRHNIDIPTLCNLKDVNEIGACRMCMVEVAGAKALQAACVYPVAPGIEVFTNTPRARKARRVNLELILSNHHRECTTCIRSENCELQSLAKDLGISDIPFEGEKSGHHIDDLSPSIVRDESKCVLCKRCLAICNKVQKIGVLGAVGRGFTSQVQPVFNKSIAEVGCINCGQCIVNCPVGALKEKSDINRVWDALGDPTKTVVVQSAPAVRAALGEEFNLPMGTNVTGKLAAALRRLNFDGVFDTDFGADVTIMEEGTELINRVKNGGVLPMITSCSPGWIKMIETYYPEMIPHLSSCKSPQNMTGALLKSHYAEMNGIDPKDLVVVSVMPCTAKKYEVQRDELSVDGNQDVDISITTRELARMIKEARLDFP…	[FeFe] Group A3	[FeFe] Group A3	Bifurcating	Labile	3	[FeFe]-centre, 3 x [4Fe4S] clusters, 1 x [2Fe2S] cluster	NADH dehydrogenase, thioredoxin	0	0.321236	0	0	0	0	0	0	0	0.995132	0	0	0	0.932283
WP_013387666.1	MQVMNFSEANCKHCYKCVRKCEVKAIKIENDQAHIMEDKCIACGQCFAICPQNARNIMSDLDFVKNAISSGRNVNISIAPSFRGFFEESQRFVSAIKKLGFNQVEETAVGADMVSQAYEKYLSSQENGAFITTCCPSVVFLIQKYYPSLVNNLIPFVSPMIAHGKLLKKERPNDLTVFLGPCVSKKCEAISKENNGIIDAVLTFDEIANWLSEENIDYFQLTPSDPHKYGSAKGKQYPIVGGILEGIKDEISKKGLISMRIDGVDECKEVFKEIINGHVENTCIEVSACKKSCIGGPGGHHISSSIFSRLQNVKEYLMSAKTEEAPPEGSVSEKELRKIISKNPLEQMVIDEHKIKEILAKMGKFSKVDELNCASCGYNTCRENAIAIIKGMSSIDMCM…	[FeFe] Group C	[FeFe] Group C3	Sensory	Labile	2	[FeFe]-centre, 2 x [4Fe4S] clusters, PAS domain	Phosphatase	1.61823	0.12325	0	3.34938	1.03069	2.47959	0	2.8497	0.739501	0	0	0	0	0
WP_013403316.1	MEMVNITIDGKKIQVPKDYTVLQAARKAGVEIPTLCYLKGINEIGACRMCVVEVKGARSLQAACVYPVSEGMEVITNSERVRKARKVNLELILSNHDRSCLTCVRSRNCELQKLAEDLNVKQIRYEGENIRRPLDDFSPSVVRDPNKCILCKRCINVCRNVQEVGVINANYRGFRTVISTAFDRSLNDVACTMCGQCIQACPVGALREKDSTDIVWKALADKNKYVVVQTAPAVRVALGEEFGLPIGTRVTGKMVTALKMLGFDKVFDTDTGADLTIMEEGTELINRIKNGGKLPLITSCSPGWIKFCEHYFPEFLDNLSTCKSPHEMFGAILKTYFAQKMGIDPANMFVVSVMPCTAKKFEAQREELAASGYPDVDAVLTTRELARMIKEAGIDFVNL…	[FeFe] Group A3	[FeFe] Group A3	Bifurcating	Labile	4	[FeFe]-centre, 3 x [4Fe4S] clusters, 1 x [2Fe2S] cluster	NADH dehydrogenase, thioredoxin, thioredoxin	0.27257	0	0	0	0	0.826529	0.808891	0	0	0	0	0	0	0
WP_013406358.1	MTKKHSVLLKEEKCEGCTNCVKGCPTKAIRVHQGKARIKEDLCVDCAECIRVCEYHAKYSKSDQLDEIINHDYPVLLIPPSFYSQFSADISSDKIKAALYKLGFKKVYDVADAAAALSRRSLEFINQNSNNYVSSSCPAIVRLIKLQYPDLIEMILPMKSPVELIAEKVKKELINEKDIKAKVFFLTPCPAKLTTVNRAIGQEKSFLDGAIAVDKIYQEIHSLLGEINEEDIKKANKLPLSIAWGKHGGEEGILKSWQEINTISVSGIKSVKKLLDEIERNNISEEISYFELTSCANGCLGGILNVINPYQAAFNLESRIKNLKNKLNKNKLDKINKEDQIYNFALSKEIKADNIVKLDKDFKIAMQKLEQMQKEIELLPGLDCAACGAPDCKTFAEDI…	[FeFe] Group C	[FeFe] Group C1	Sensory	Labile	2	[FeFe]-centre, 2 x [4Fe4S] clusters, PAS domain	Histidine kinase	0	0.17394	0	0	0	0	0	0	0	0	1.04364	0	0	0
WP_013484003.1	MEEYQEMSRRLQKATAEGRLQDEIDAIRASGSEKEKQQLDMLLHPENYPPVVRLEDCMCSTDHQAACEVSCLFEAIGRDRDGKLVITGDCVGCGQCVERCEQKALAGRKDLIPLLKLLRERSTPVYAMIAPAFSGQFTAEVTSGRLRTAFKRLGFYGMIEVALFADILTLKEALEFDQTIQSDEDFMLTSCCCPMWVALIKKGFSELIPHVPPSVSPMVACGRTIKKIHPEAKTVFIGPCIAKKAEARQPDVADAVDFVLTFDEVGQMFADAELDLPNLPEDMSDHSSTAGRIYARTGGVSQAVQATLDRLRPDHKIPLRAIQADGIVACKQLLADLKDGKIKANFMEGMGCKGGCVGGPKSLLPKEEATGHVNAYGEQAGYATPADNPYVLEILRRLG…	[FeFe] Group B	[FeFe] Group B	Evolving	Labile	1	[FeFe]-centre, 2 x [4Fe4S] clusters	None	0	0.165855	0	0	0	0	0	0	0	0.995132	0	0	0	0
WP_013486450.1	MKDSIVIDGRRVELDGEKNLLEVVRKAGIDLPTFCYYSCMSVYGACRMCTVEDSRGRTMAACSTPPKPGMEIRTNTERLRKYRRMILELLLSNHNRDCTTCEKNGSCKLQELALRFGVRKVRFRQEVRDLPLDTSSPAILRDPQKCILCGDCVRMCAEVQGVGALAFAYRGSDMEVTTAFHRSLGDVGCVGCGQCAGVCPTGAITVRDDTARAWKALQDPQTRVVAQIAPAVRVAIGEEFGMEPGEVTLGKLVAAMRMLGFDEVYDTGLGADLTVTEEGNELLDRLQNGGRFPMFTSCCPGWVTYARNRHPELAENISTCRSPMGMFGAVLRDYFSGKDTAEGKKTFSVAVMPCTGKKLEAGWDEMVTEIGKDIDVVLTTQEIAQMIREGGIDFAALES…	[FeFe] Group A3	[FeFe] Group A3	Bifurcating	Labile	3	[FeFe]-centre, 3 x [4Fe4S] clusters, 1 x [2Fe2S] cluster	NADH dehydrogenase, thioredoxin	0	0.329321	0	0	0	0	0	0	0	0	1.04364	0	0	0.932283
WP_013499973.1	MCTPDQASQSARDPAEATIALLINGVACAGFANETILSCARRYDVYIPTLCELEDIDHTPGACRVCLVEILQAGKDTAQIVTACNTPVRDGMEVQTRSKKARDMQRLQVELLMADHLQDCATCIRHGSCELQDLAQFVGLQQNRFFDRERTESRPVDQSSPSMVRDMRRCVRCQRCVAICRYHQKIDALAIEGSGMERVVALRDADGYPNSVCVSCGQCVLVCPTGALGERDETERALSYICDPNVVTVVQFAPAVRVAFGEEFGMPAGTNVEGQIIAACRKLGVDVVLDTNFAADVVIMEEGAELLARLKQGRRPTFTSCCPAWINFAEIHYPDVLPLLSSTKSPQQVLSTIAKSYLPEQLGVSAERIRVISIMPCIAKKDEAVRPQMVHDGRPETDL…	[FeFe] Group A2	[FeFe] Group A2	Evolving	Labile	2	[FeFe]-centre, 3 x [4Fe4S] clusters, 1 x [2Fe2S] cluster	NADH-dependent glutamate synthase	0	0.15538	0	0	0	0	0	0	0	0	0	0	0	0.932283
WP_013537874.1	MANRVVVDPITRIEGHLRIEVVPENGYIKDAYSSSQMWRGIEVILQGRDPDDAWMFAQRICGVCTTVHAIASVRSVENALNLEVPYNAQMVRNIIIAAHALHDHIVHFYHLSALDWVDVVSALKADPHKAAKIAESYQNWRLNGASVFKAVQDKLKKFVDSGQLGPFANGYWGHPAMKLPPEVNLIAVTHYLQALDFQRKADQAIAILGGKNPHIQNLAVGGVSTAINPNNEATLNMERLYYIKQLLEEVRDFVHNCYLPDVIAISAFYKEWLQYGRGVDNYLAVPDLPQDPKGETFDMPGGTIFGGDLSTVKPIKRFGDEYFVKNVVENITHAWYKGDWTRHPWDEETVPDYTGMPGGYVDPNGKYSWTKAPRFRKGDTYVPMQVGPLAQVLVGYAQG…	[NiFe] Group 1c	[NiFe] Group 1c	Anaerobic Uptake	Sensitive	4	[NiFe]-centre, 2 x [4Fe4S] clusters, 1 x [3Fe4S] cluster	[FeS] protein, TM subunit	0	0.17394	0	0	0	0	0	0	0	0	1.04364	0	0	0
WP_013547705.1	MAFQSNIMIVRHRLLKELVKLWNDNELVEKIDRLPIELSPRRSKHAGRCCVHKERAVWKYKSLPLLGLDMEDETDELTPLSEYAVRALDRAENGKPKENIMCVIDEACSACVQINYEITNLCRGCTARSCQVNCPKKAVHVKESGQAWIDHDACISCGICHKSCPYHAIVYIPVPCEEACPVKAISKDEKGIEHIDESKCIYCGKCLNACPFGAIFEVSQVFDVLHKIRKGEKLVAVVAPSILGQFKTTIEHVYGALKAVGFTDVIEVAQGAMDTVSNEAHELLEKLEEGQKFMTTSCCPSYIELVNKHISGMKPYVSGTGSPMYYTARIAKEKYPDAKIVFIGPCVAKRKEAQRDEAVDFIMTFEEVASVLAGLDIPMEQAQPYAMKFTSVREAHGFA…	[FeFe] Group B	[FeFe] Group B	Evolving	Labile	1	[FeFe]-centre, 3 x [4Fe4S] clusters, 1 x [2Fe2S] cluster	None	0.197262	0	1.18357	0	0	0	0	0	0	0	0	0	0	0
WP_013607267.1	MDEQLITCIIDGNAITTQKGTRILDACMTAGIKIPTLCYLKDVSAHGSCGMCMVEVEGAKRLVRSCMHTVTAGMVIHTHTQRVLHARKLNLELILANHPLVCTTCERNLNCELQSLSQQLGVRTSRFPRTKKKFEELDVTSASLVRDPNACILCNRCVEVCSSMQSVSAIQLVGRGLKTKVATFYDQGLGNSVCTNCGQCSLVCPTAAITEKSQQQQVFDALSDPDLVVLVQTAPAIRVGLGEAMGLKEGSLVTGRMVSALRSLGFDKVFDTQFTADLTIMEEAYELIHRLTHQGELPMITSCSPGWIKFIETFYPEQVGHLSSCKSPQQMFGAIAKTFYAEQANLDPRKIRVVSIMPCTAKKFEAGRSEMDSSFDYWKEKMNLGEDERFCDVDWALTT…	[FeFe] Group A3	[FeFe] Group A3	Bifurcating	Labile	3	[FeFe]-centre, 3 x [4Fe4S] clusters, 1 x [2Fe2S] cluster	NADH dehydrogenase, thioredoxin	0.662672	0	0	2.23292	1.03069	0	0	0.712424	0	0	0	0	0	0
WP_013608539.1	MLELNNQYTLMKRQVHAEVLKEFFAGTLKENVDKLPIRIIPKQRVPNRCCIYKERAMVRYRIMALLGINIETEDDELKNLSEYVQEVMEADKPAAPILTTISTACSSCPPDRYLISDACRGCFARPCLANCPKDCITFSGGQAHIDESRCIRCGKCKEVCPFHAVVHIPVPCEEACPVNAVKKNAEGYVEIDYKLCISCGRCAMSCPFGAIVERSSLIPVVKMLERSEHVTALIAPAIEGQFPGTLAQIKAALLSAGFSSVMEVSEGAETTSLHEAAELAQRKGKGEGFMTTSCCPAYMELVDKHLPFLKERRSCALSPMGYAALKAKEANPQTRNVFIGPCLAKKVEAVRLDTIDGVITFSELASLFIAKNIDVREMEGADLGDTASFEDCRQFALSG…	[FeFe] Group B	[FeFe] Group B	Evolving	Labile	1	[FeFe]-centre, 3 x [4Fe4S] clusters, 1 x [2Fe2S] cluster	None	0.256492	0	0	0	0	0.826529	0	0.712424	0	0	0	0	0	0
WP_013638066.1	MAKRVVIDPVTRIEGHLRIEVVPENGYVKNAYSSAQMWRGLEVILQGRNPDDAWMFVQRICGVCTTVHALASVRSVENALQLEIPYNAQMIRNIIIAAHALHDHIVHFYHLSALDWVDIVSALKADPQKAAKIAESYQDWKLNGASVFKAVQDKLRKFVESGQLGPFANGYWGHPAMKLSPEVNLIAVTHYLQALDYQRKATQAVAILGGKFPHIQNLAVGGVSTAINLDNEATLNMERLYYIKQLLEEVREFVHNCYLPDVIAISAFYKEWLNYGRGVDNYLAVPDLPQDTKGEVFDLPGGTIIGGNLSTVKPIKSFNDPYFINNVAENITHSWYKGDWTRHPWEEDTIPEYTGMPGGYVDGNEKYSWSKAPRFRHNGNYIPMQVGPLAQVLVGYAQG…	[NiFe] Group 1c	[NiFe] Group 1c	Anaerobic Uptake	Sensitive	4	[NiFe]-centre, 2 x [4Fe4S] clusters, 1 x [3Fe4S] cluster	[FeS] protein, TM subunit	0.134815	0.857265	0	0	0	0	0.808891	0	0	0.995132	0	2.92248	1.22598	0
WP_013656601.1	MSGQFMLIDGMPVEINGEKNILELIRKAGIELPTFCYYSELSVYGACRLCVIENQWGGIEASCSTPPKAGMEIYTNTPRLRKYRKMILELILANHCRDCTTCEKNGDCKLQELAMRFGINQVRFKNSKKEVPLDTSSRAIVRDESKCILCGDCVRMCDEMQNIGAIDFAHRGTNMRISTAFHKPISESKCVSCGQCAAVCPTGAIVVKNDTQAIWNVISDPETKVIVQIAPAVRVGIDQSLGEENGHNVMGKIIAALRRMGFDEIFDTTTGADLTVLEEANELLERIERKDTLPLFTSCCPAWVKYVENNHPELISQVSSCRSPMEMFGAVLKEHYSHSRRKVIVVAVMPCTAKKEEAARDELKRDGIPDVDYVLTTRELIQMVKESGIVFNELEPEAV…	[FeFe] Group A3	[FeFe] Group A3	Bifurcating	Labile	3	[FeFe]-centre, 3 x [4Fe4S] clusters, 1 x [2Fe2S] cluster	NADH dehydrogenase, thioredoxin	0.901929	0.471131	0	1.11646	2.06137	0	0.808891	1.42485	0.739501	0	2.08728	0	0	0
WP_013701174.1	MTKNLNTQTGKYRSVISVDKEKCVNCQRCIAVCPVKMCNNGSGDYVDFDEKLCIGCGSCIEACTHGARKGIDDAELFFDSLKKGEKIVAIVAPAAIVSFRGKDLELNGFLKSLGVEAVFDVSFGAELTTKSYVEYIKNKNPDCVISQSCPALVSFIETYRPELIKYLAPADSPMLHCAKMIKEFYTKYTGYKIAAISPCYAKRREFDETGICDYKVTMRSIQSYMEEKNIRIDSFPKVEYENPAAERGVLYSTPGGLMRTAERFVPSISEKTRKIEGNPKVFHYLAKFSEANKNKKPCFTLIDCLNCENGCNEGAGTTNKGMHLDEMESFVENRMHDRRSYWEQKGHSKKSALKKLNKAIDEFWKPGLYDRTYVDRSAYFHQKIKEPSQEEIQKIYRDM…	[FeFe] Group C	[FeFe] Group C2	Sensory	Labile	1	[FeFe]-centre, 2 x [4Fe4S] clusters, PAS domain	Fusion with methyl-accepting chemotaxis protein	0	0.15538	0	0	0	0	0	0	0	0	0	0	0	0.932283
WP_013756843.1	MANITCTIDGQRVSVPEGTTILNAAKQVGVKIPTLCYLEHVGLRHVKHEVGECRVCVVEVEGKKDFVTSCNTPVEENMIIHTHTPKIIAARKLNLEMMLSDHHLDCPTCPKNGICELQKLCAELNVRQIRPQGEKKELPIDDSSPSIIRDPNKCILCQRCITACRVLQTVDALELYGNGYDAVVRPKGGLPLIETQCVACGQCALVCPTGAILEKDDTGTVWKALADPKKHVVVQTAPSTHVTIGEAFGLPVGTDITGKMVAALKRLGFNAVFDTNWSADLTIMEEGYELIHRIKNGGVLPQFTSCSPGWIKFCEEFYPDLLPHISSCKSPQQMFGPIAKTYYAEKKGINPEDIFVVSIMPCTAKKYEAARPEMNAAATYWNNPNITRDVDVVLTSREL…	[FeFe] Group A3	[FeFe] Group A3	Bifurcating	Labile	3	[FeFe]-centre, 3 x [4Fe4S] clusters, 1 x [2Fe2S] cluster	NADH dehydrogenase, thioredoxin	0.134815	0.15538	0	0	0	0	0.808891	0	0	0	0	0	0	0.932283
WP_013757426.1	MSTSVKPVIRVDKSKCVNCHRCITVCPAKMCNDGSGNYVGVNTDLCIGCGECIEACSHGARVGLDDADDFFRAVKNGEPVVAVVSPAVAASFNGEYLRLNGWLKSVGVKAVFDVSFGAELAVQSYAEYMRRQDPKLVIAQTCPVLVSFIEIYRPELIPYLAPVDSPVLHTMKWIRQFKPEYASAKIAAITPCYAARLEFDETGTGDFNVTIKSLESYIESHGIDLSSFPETEFETPPAERAVTFSTPGGLTRTAERVMPGISGITRRIEGQPQIFTYLAHLSKAIKSGDAPVFKLVDCLNCEMGCNAGPATSNSTCNRDKVEGYIERRAVKAALKAGKRRKPITSAKMNKSLEKYRKPGLYDRTYVDRSDKFAESFHIPTDAELKNMYRAMRKETKNDM…	[FeFe] Group C	[FeFe] Group C2	Sensory	Labile	1	[FeFe]-centre, 2 x [4Fe4S] clusters, PAS domain	Fusion with methyl-accepting chemotaxis protein	0.792595	0.976395	1.18357	1.11646	1.03069	0	0	1.42485	1.479	0.995132	0	0	2.45195	0.932283
WP_013778939.1	MDMVTLTIDGIKVQAPKDATVLEAARKAGIRIPTLCFLKGVNEIGACRMCVVEVKGAKSLQTACVLPVSDGMEVITNSAAVRESRKVTLELLLSDHNLECPTCIRNLNCELQKLSEELGVQAIRYPGEKSKAQYDDFSPSIVRDTSKCILCRRCVSTCHKVQGVGVISPNYRGFNTVIAPVYDMSLSEVSCVNCGQCIMACPVGALKEKDDTDKVWKALADPEKYVIVQTAPAIRVSLGEEFGGELGTIVTKKLPAALRRLGFDKVFDTDFSADLTILEEGSEFLDRLQNGGKLPLITSCSPGWIKFCEHYYPEFLDNLSTCKSPQQMFGALVKTYYAEKMGIDPSKIFSVSIMPCTAKKYECKRPEMFSSGYQDVDVALTTRELSRMLKEAGINPNKL…	[FeFe] Group A3	[FeFe] Group A3	Bifurcating	Labile	3	[FeFe]-centre, 3 x [4Fe4S] clusters, 1 x [2Fe2S] cluster	NADH dehydrogenase, thioredoxin	0.527993	0.278631	0	0	1.03069	0	0	2.13727	0.739501	0	0	0	0	0.932283
WP_013778946.1	MIFLQQHYHSVTLDVDKCKGCTNCIKGCPTEAIRVRNGKAHILDNKCIDCGECIRICPNSAKYAATDSISRLKEFKFKVALPAPSLFGQFKEGTSTKNIIYALKKIGFDEVYEVPLAAEEVTIAIREYISTHKDVRPLISSSCPAVMRLIQVRFPELIKNIIPIKSPMEIAARRAKEILNKEFGYKAEEIGVFFISPCPAKATSVRQPIGSDKSYVDGVISISGIFGDIVKNLDGEEFESIFNSSSGLGIGWGRAGGENLAIGGDNYLAVDGIHNCIEVLEEVEMNKLFDIDYIECQACIGGCIGGALTVESQYIARVKIRRLSEKLGSNSPINKNEVVEQFKNGYFNLEGKILPKSSLKLDDDLVEAIRKMELLEKTVKDLPGLDCGSCGSPNCRALA…	[FeFe] Group C	[FeFe] Group C1	Sensory	Labile	2	[FeFe]-centre, 2 x [4Fe4S] clusters, PAS domain	Histidine kinase	0.118737	0	0	0	0	0	0	0.712424	0	0	0	0	0	0
WP_013779523.1	MEKTMKINGKQVSFTDEANLLEVIRKAGIELPTFCYHSELSVYGACRMCLVEDDNGRIMAACSTPPRPGMSIRTHTERLIRQRRVTLELLLANHDRECTTCVKSGNCRLQELANILGIGEIRFGQKNGRLPIDDSSPAIVRDPNKCILCGDCVRMCEEVQGVGVLGFAYRGSNAKVVPPFNKNISEVNCVDCGQCAAVCPTGALTIASHMEKVWSALYDPQKTVVAQIAPAVRVSLGEEFGLKPGTPATGKVVGALKKIGFDKVFDTCFAADVTAIEESCEFLERISKNQRLPQFTSCCPAWVKYVELHYPQYKDNISTCRSPQQMFGSLMKGIYAKAMGTDSENIFVVSIMPCTAKKSEAKREEFFKNGIPDVDAVLTTQELARMIREAGVVFDEVEE…	[FeFe] Group A3	[FeFe] Group A3	Bifurcating	Labile	3	[FeFe]-centre, 3 x [4Fe4S] clusters, 2 x [2Fe2S] cluster	NADH dehydrogenase, thioredoxin	0.372153	0	0	2.23292	0	0	0	0	0	0	0	0	0	0
WP_013780878.1	MDEKMVTLTIDGQKVTVPAYYTILEAARSANIRIPTLCFLKDINEIGACRMCIVEIKGAKALQASCVYPVADGIEVSTNSPAVRDARKVTLELILSNHDRSCLTCVRNRNCELQQLADELNIKEIPFEGERLTLPIDDLSPAIVRDPNKCILCRRCISTCRNVQEIGVIGATERGFNTMVEPPFKMSINQVPCINCGQCIEACPVGALREKDDTERVWTALADPELHVVVQTAPAVRAALGEEFGMPIGTRVTGKMAAALRRLGFDKVFDTDFAADLTIMEEGTELLDRLKNGGKLPLITSCSPGWVKYCEHYYPEFLDNLSSCKSPHEMMGAVLKSYYAQKMNIDPSKIFVVSVMPCTAKKFEAQRPELAANGHPDVDVVITTRELARMIKEAGINFL…	[FeFe] Group A3	[FeFe] Group A3	Bifurcating	Labile	4	[FeFe]-centre, 3 x [4Fe4S] clusters, 1 x [2Fe2S] cluster	NADH dehydrogenase, thioredoxin, thioredoxin	0.619072	0.278631	0	0	2.06137	1.65306	0	0	0.739501	0	0	0	0	0.932283
WP_013781004.1	MNMVNLTIDGRKVTVPENTSILDAAKKVGIDIPTLCYFPDQNIKGNCRVCVVEVEGSRTLAASCSTPVSEGMAVKTWSKNVMNARRTIVQLMLADHDEDCNNCIKNGVCELQSLAQRLNIQYNPFKNILELKPIDTSTPSLIRNPNKCVKCGRCVDMCQETQQVGILFDAYRGVDSEIVSGLGKYLSDAGCILCGQCSTACPVAAIYENDETDKVWQAIFDPSKRVIVQTAPAIRVSIAEEFDMPPGTVALGQLAAALRRLGFDDVFDTDFAADLTIMEEGHELLERLQHGGTLPMITSCSPGWINFIEQYYPDLLSHLSTCKSPQQMFGAVAKTYYAQKIGLKPEDIFVVSIMPCTAKKYESGRPEMSDSGVRDVDVALTTRELARMIRQAGIDFAAL…	[FeFe] Group A3	[FeFe] Group A3	Bifurcating	Labile	3	[FeFe]-centre, 3 x [4Fe4S] clusters, 1 x [2Fe2S] cluster	NADH dehydrogenase, thioredoxin	0.186077	0	0	1.11646	0	0	0	0	0	0	0	0	0	0
WP_013787821.1	MSVINFKEANCRNCYKCIRYCPVKAIKVNNEQAEIIEYRCIACGRCLNICPQNAKTVRSDVEIVQSFLNRGEKVVFTVAPSYPALVGHNNALKFLKALKSLGAEMIVETSVGAMLISKEYEKYYNDLKYDNLITTSCPSVNYLVEKYYPDLINCLVPVVSPMVAVGRAIKIMYGESMKVVFIGPCLAKKAEMNDFSCEGAIDAVLTFEEVMNLLGTDEVDFEYMEDYLEDVDVEEQYKLYPIEGKTIDCMDVDLNLRKVVSVSSIENVKDLLNDLRYGNLHGYWIEANACDGGCINGPAFGKLKSGIAKRKEEVISYSRVKERVNDDFSDFSDFSLDLSRKFIDLSDKWKMPSESEIKEILSKIGKFSPEDELNCGACGYDTCREKAIAVFNGMAEPYM…	[FeFe] Group C	[FeFe] Group C3	Sensory	Labile	3	[FeFe]-centre, 2 x [4Fe4S] clusters, PAS domain	Phosphatase, thioredoxin	0	0.454961	0	0	0	0	0	0	0.739501	1.99026	0	0	0	0
WP_013787823.1	MDKVRITIDGIPVEVPANYTVLQAAKYANIDIPTLCYLKEINEIGACRLCVVEIKGVRNLQTSCVYPVSDGMEIYTNTPRVREARKSNLELILSAHDRSCLTCVRSGNCELQDLSRKFGIDEIRFMGENIKYQKDESSPSIVRDPNKCVLCRRCVATCNNVQNVFAIGMVNRGFKTIVAPSFGRGLNESPCISCGQCIEACPVGAIYEKDHTKMVYDALLDEKKYVVAQTAPAVRVALGEEFGMPYGSIVTGKMVSALKRLGFDKVFDTDFAADLTIIEEGNELLKRLNEGGKLPMITSCSPGWINYCERYYPEFIDNLSTCKSPHMMMGAIIKSYFAEKEGIDPKDIFVVSIMPCTAKKGEIDRPQMIVDGMKDVDAVLTTRELARMIKQSGIDFVSL…	[FeFe] Group A3	[FeFe] Group A3	Bifurcating	Labile	4	[FeFe]-centre, 3 x [4Fe4S] clusters, 1 x [2Fe2S] cluster	NADH dehydrogenase, thioredoxin, thioredoxin	0.171781	0	0	0	1.03069	0	0	0	0	0	0	0	0	0
WP_013823357.1	MSLVTLTIDGRQVQVPPGTTILAAARQAGVKIPTLCYLEELNVIGACRLCLVQVEGARALVAACVTRAAEGMVVHTNTPAVRHARRLNLELIMSNHPQECLTCVRNTGCELQQLAAELGVGEIRLQGEMSPYEVDDSSPSIIRDPRKCVLCRRCVAVCEKVQGVSAIAVQERGFDTVVAPAFLAPLGEVNCVNCGQCSLVCPTAAIHERDETDKVWAALADPEKHVVVQTAPAVRVSIGEMFGLEPGSIVTGKLVAALRRLGFDKVFDTDFTADLTIMEEGSELIHRLQNGGRLPLITSCSPGWIKFIEHFYPNLLPNLSTCKSPQQMFGALAKTYYAQKEGIDPARIFVVSIMPCTAKKYEAGRPEMNSSGYRDVDVVLTTRELGRMLKQAGIDFDSL…	[FeFe] Group A3	[FeFe] Group A3	Bifurcating	Labile	3	[FeFe]-centre, 3 x [4Fe4S] clusters, 1 x [2Fe2S] cluster	NADH dehydrogenase, thioredoxin	0.137755	0.339796	0	0	0	0.826529	0	0	0	0.995132	1.04364	0	0	0
WP_013823947.1	MVTLTIDGLKVQAEEGSTILEAARRANIRIPTLCYLPEVQAIGACRVCLVEIEGNRNLQPACVFPVSEGLVVHTNNVRVRRARKFSVEMILSDHPMDDCLTCTRNQRCELQKLADELGIREVKFTGEKSEGRLDNLSPSIVRDQSKCILCRRCVTVCKEIQEVAAISIQGRGFKTRVEPAFGESLNDVACALCGQCILVCPVGAIHEKEHIEEVWHAIFDPSKFVVVQDAPAVRAALGEEFGYPPGTLVTGKMLAAVRRLGFDRVFDTNFAADLTIIEEGHELLKRIKEGGVLPMITSCSPGWVKFIEHFYPELLPHLSTCKSPHQMLGALVKTYYAQKVGVDPKDMVVVSVMPCTAKKFECNRPEMNGSGYKDVDYVITTRELAKMIKQAGIDFASLE…	[FeFe] Group A1	[FeFe] Group A1	Evolving	Labile	2	[FeFe]-centre, 3 x [4Fe4S] clusters, 1 x [2Fe2S] cluster	Thioredoxin	0.469833	0.204329	1.18357	0	0	0.826529	0.808891	0	0	0	0	0	1.22598	0
WP_013907653.1	MKKELSPVVKVDAEKCNNCHKCIAVCPVKFCNKASESAVEINHNMCIGCGACIEVCETGARQWVDDFDAFMKDVKKTNMVAIVAPAVAANFPHNYLRLNGWLKSIGIKAVFDVSFGAELTVKSYVEYLKKKQPNMIIAQPCPAIVTYMQIYQPELLEYLIPVQSPMLHTIIMIKHFYPEYKDFKVAVISPCLAKKREFDETGLGDYNVTFKSIDKYFREKNIQLSSYPEVDFDNPPAERAVLFSSPGGLMRTAERWIPDIKERTRKIEGVTMVYSYLKKLPELVRKGLNPLLVDCLNCELGCNGGPGSLRQHASPDEVEFYIEKRRKEMQERYKARFGNKVSAKKIEKVVNKYWKEGLYDRSYLNLKENNELKMPSERELKKVYETMHKYSEKDLYNCM…	[FeFe] Group C	[FeFe] Group C2	Sensory	Labile	1	[FeFe]-centre, 2 x [4Fe4S] clusters, PAS domain	Fusion with methyl-accepting chemotaxis protein	1.03645	0.204329	2.36715	0	0	0	2.42667	1.42485	0	0	0	0	1.22598	0
WP_013970147.1	MVNLTINGMPVQVEEGTSILDAAKKTNIKIPTLCYNPDLPPWAACGICIVRMEGSPKMVRACTTPVAEGMKVITHDPEIIQVRRTVVELILSNHPNDCLQCPRNGNCELQTLAAEFGIREVPFQNIVKDLKKDESNPSIILDPKKCVRCGRCVKVCQDMQNVWAIEFLGRGISGRIASAADVPLGESPCIKCGQCSAHCPVGAIYERDDTRKVWAALQNKDIHPVVQIAPAVRVALGEEFGLEPGTIITKKIYAALRRLGFKTVFDTNFAADLTIMEEGTELVKRLTEGKGDIPLITSCCPAWVDYLEKYYPEMIPHFSTAKSPQQMMGAMIKAYWAQKAGVDPAKVFSVSIMPCTAKKWEIDRNDDMKSSGYQDVDVSITTRELARMIKQAGIDILNL…	[FeFe] Group A3	[FeFe] Group A3	Bifurcating	Labile	4	[FeFe]-centre, 3 x [4Fe4S] clusters, 1 x [2Fe2S] cluster	NADH dehydrogenase, thioredoxin, thioredoxin	0.118737	0	0	0	0	0	0	0.712424	0	0	0	0	0	0
WP_013979629.1	MTKTAIQVDHIARVEGHGNVHVVIEDGVVKTVEMNVVEPARLFESMVRGRRFEEIPYIASRICGICSASHVVTDLRAIERVFGVEVTPRTRALRELLVYGSYLQNHASHLFVFAVPDFVGHKSVFPLADENPELFQQALGLKALGNELCTRVGGRSIHPITAVVGGFTHELEAADYLELANKMDAAMEFALQTVDLFSGFAVPDIASQGDMLAMVEPNYYPVECSNIARFLKAGIEFDANEVGDNLEEYTVAHSAALLCRVRSTGDPFFTGALARVNASWEHLGQKAKIAAAKAGLRPPEYNPFMNNVAQAVELVDALDRCAGLCRALAEPGAIEGSSEPVAFEVRAGRGVGFTEAPRGALFHDLELDDEGRVVHASIMTPTAQNVANLEADMRLLAEK…	[NiFe] Group 3b	[NiFe] Group 3b	Bidirectional	Tolerant	4	[NiFe]-centre, 3 x [4Fe4S] clusters	Diaphorase, [FeS] protein	0.27257	0.17394	0	0	0	0.826529	0.808891	0	0	0	1.04364	0	0	0
WP_013979777.1	MGKATVIPFGPQHPVLPEPLHLDLVVEDETVIEAIPQIGFIHRGLEKLVETRDYNQFIYVAERICGICAFGHSMGYAETVEKLMGVEIPERAEYLRVIWHELSRIHSHVLWMGLAADAFGFESLFMHCWRLRERVLDIFEKTTGGRVIFSVVKVGGVVRDIDDAMFAEMKRTLEGIKDDYRQICNAFLKDSSVKNRTVGVGYISPEDAFALSMVGPFARASNVSNDARSLGNGGYGKLSDFQPVLDTQGDCYARVKVRALEVLQSIDIIEEMIAKIPAGDIAVDVKGSPSAGAEAANLVEQPRGECYYYARGNGSKYLERMRMRTPTSQNLAGMTSALAGCDLADVNMIVLTIDPCISCTER	[NiFe] Group 4e	[NiFe] Group 4e	Evolving	Sensitive	6	[NiFe]-centre, 1 x [4Fe4S] clusters	NuoL, NuoH, NuoC, [FeS] protein	0.27257	0.278631	0	0	0	0.826529	0.808891	0	0.739501	0	0	0	0	0.932283
WP_013979953.1	MVKLSIDGRETSASEGSTILDAAAGLGIKIPTLCALKDLNIIGSCRVCLVQVEGEEAPCAACSTPVREGMEVRTDTPQVAAMRRANVEALLDSHRSECTSCARVDTCALRKLAADFAVGESTCDMPAKGAWNEDFPLIRDSSKCIKCMRCVAFCEKVQHCAVWEPSGSGTGASVAVKDGLDISEAGCALCGQCITHCPTGALTARSDIDKVLDALLDPEVMTVVQVAPAVRAAWGEGVKLSREQATPGRMASALRALGFDRVFDTDFAADLTIMEEGSEFLEFVKSDKPRPMFTSCCPGWVRFAKLHHPEIVPQLSSAKSPHQMMGALVKNTLREAAEAGGKKRIFCVSVMPCVAKKYECDVPELSTEGGRDVDAVLTVREFDRMLRMFSVDCAALEET…	[FeFe] Group A2	[FeFe] Group A2	Evolving	Labile	2	[FeFe]-centre, 3 x [4Fe4S] clusters, 1 x [2Fe2S] cluster	NADH-dependent glutamate synthase	0.137755	0	0	0	0	0.826529	0	0	0	0	0	0	0	0
WP_014015846.1	MSRFINNLKRRVAKEQKKIVLPESESRRVLQAAERVQAEGFARPILIGRPQSIVEVASEYQIDMDGIEIIDPETYPMMDKFCEYYAKRRAKKGMTLEEARKVLSENYIFFAACLVAFDIADGMVAGAVATSSEVIRAALQVIGPHPGLSTVSSSFIMITDKPQFGDDGIFVVGDCSVVIEPTPQQLADIAVSCVERARRTAQMLDPKVALLSYSTMGSGAGEEVDRVREAVRLLRDRNVDFEFDGEMQADAALVPRIARQKAPGSTVAGQANVLVFPNLVSGNICYKVLEHLAGATALGPLLQGLAKPVMDLSRGCTPEDITDVIAICCSDAIYMQAEKKRDIAFTSRFEKLDRRVAVENRNISIQFDPEKCKNCTLCRRRCADVMSMTGYYSLESTGD…	[FeFe] Group A1	[FeFe] Group A1	Evolving	Labile	1	[FeFe]-centre, 2 x [4Fe4S] clusters	None	0	0.165855	0	0	0	0	0	0	0	0.995132	0	0	0	0
WP_014079355.1	MHEEILKREHKAEKQRKEEMRYDQMDCLLLAGEEKTERTIPVCETVFPEKFADLNAVREVLLTPEKQVYALIAPAFMGQFGEGVSPGAIRAALKRAGFSGMVEVAVFADILTLKEALEFDRHVNRDTDFLLTSCCCPVWVSMIRNIYGELVPYMPGAVSPMIAAGRAVKKMHPDAVTVFIGPCLAKKKEAKEPDICDAIDVVLTFQETAMLFEAMGIAPQQMEEDASEHSSGAGRIYARTGGVSEAVVRTVEQLHPGRKIAVRPMQADGGKACKQMIEAIQEGKTEANFFEGMGCVGGCVGGPRALLPREEGSAYVDHYGKEALYQTPLENPYVIELLEKLGFSTVEDFLEKSDLLTRHF	[FeFe] Group B	[FeFe] Group B	Evolving	Labile	1	[FeFe]-centre, 2 x [4Fe4S] clusters	None	0.309536	0	0	0	1.03069	0.826529	0	0	0	0	0	0	0	0
WP_014186009.1	MLDGIVYTDMEQCQACSACLRVCRTKSIMMKEGKSKIIEESCLNCGACLKACSRGAKKYQSGLEAVEELLAKDKSAIILAPSYVIVAQKRYGCSPEQFGTALRKLGFALVYEASFGADVVTKVYLNYLWDFLNTQGREKTHVITSPCPSLMNFMEKHAPSLLDEFAPIMSPMAAQAVLVKQWNQGQVRIVGASPCMAKKSELLDPELGLYDQKLTFEELIQLLDRRGIVPACLEETEFDGIQALYGAGFPISGGLTKALEPFSGELGFNLLSNDYLIIEGEDRSTNFLKQMARHKQGSGGLAGYPLLIDILFCEGCIMGKSLGVEGDYWENKRLITDYTKKRFQKLQENSQECQGYITLVKNTVEVPEFQRWLAIVEELIADNQFTRPWQSREYHRKEP…	[FeFe] Group C	[FeFe] Group C3	Sensory	Labile	1	[FeFe]-centre, 2 x [4Fe4S] clusters, PAS domain	Histidine kinase	0.137755	1.55235	0	0	0	0.826529	0	0	0.739501	0	0	1.46124	2.45195	4.66141
WP_014186347.1	MSLEILITNKELCVGCNKCIAKCPVKANVAFLFNGENRVKVDHLKCIHCGACIDICDHHARDFADDTERFFSDLKLGHDITVIAAPSIRFNISEYTRLFGYLKSLHVTRIYDVSLGADITTWAYLKAIEEQKLESIIAQPCPVIVNYIQKYRPELIWNLAPIHSPMMCTAIYLKKYLKNHDRIAFLSPCIGKIDEIKEKNTQGFIEYNVTYKKIESYLRDNQIELFNYPESDYDEVGYGIGLTYSRPGGLSENVELYKPDAWVRQIEGPERVYRYLDEYSLRIAEHKPLPLILDILNCQKGCNGGTATCNKISVDDVDFKMNALKKEKVQSYGPSRQESEILAVYELLYKDFRLEDFARIYEDKSGVLKVHSFSDLEEIFTQLHKTTEASRNVNCFACG…	[FeFe] Group C	[FeFe] Group C2	Sensory	Labile	1	[FeFe]-centre, 2 x [4Fe4S] clusters, PAS domain	Fusion with diguanylate cyclase	0	0.24354	0	0	0	0	0	0	0	0	0	1.46124	0	0
WP_014254276.1	MSRRTIIPFGPQHPVLPEPIHLDLVMEDEKVVEAIPSIGFVHRGLEKLVEKKDFIEYIYVAERICGICSFMHGMGYSQAIEQIMNIEVPERALFLRTIWAEFSRIHSHLLWLGLLADAFGFESLFMQSWRVREKVLDIMEETTGGRVIFGSCKIGGVRKDIDTVTLKRIEKVLVDLEKEIREISNVFLNEYTVKSRLVGVGVLSKEDAYNLGAVGPMMRASGIAQDMRKLGYGAYSQLDFEPITRASGDSYDRCAVRIEELFQSIDLIRQAIGKIPEGPVDTKVTGNPDGEAFVRLEQPRGEVVYYVKANGTKFLDRLRVRTPTFANIPALLKMLKGCDYADVPILILTIDPCISCTER	[NiFe] Group 4e	[NiFe] Group 4e	Evolving	Sensitive	6	[NiFe]-centre, 1 x [4Fe4S] clusters	NuoL, NuoH, NuoC, [FeS] protein	0.134815	0	0	0	0	0	0.808891	0	0	0	0	0	0	0
WP_014254579.1	MFWKGVHKTMEMVNITIDNRKIQVPKDYTILEAAKAANIYIPTLCFLKDINEIGACRMCVVEVKGARSLQAACVYPVSEGLEIYTQSPAVREARKVTLELILSNHEKKCLTCVRSKNCELQTLAEELNVKDIRFEGETYKLPLDDFSPSVVRDPNKCILCRRCVSMCKNVQQVSVIDTTERGFKTIISSAFNKSLNEVPCTMCGQCINVCPVGALREKDDTDKVWEALANPELHVIVQTAPAVRVALGEEFGMPIGSRVTGNMIAALKLLGFDRVFDTDTAADLTIMEEGTEVINRIKNGGKLPVITSCSPGWIKFCEHYYPEFLDNLSTCKSPHEMFGAILKSYYAEKEGIDPSKVFVVSIMPCTAKKFEAARPELAANGYPDVDVVLTTRELARMIK…	[FeFe] Group A3	[FeFe] Group A3	Bifurcating	Labile	4	[FeFe]-centre, 3 x [4Fe4S] clusters, 1 x [2Fe2S] cluster	NADH dehydrogenase, thioredoxin, thioredoxin	0.186077	0.327579	0	1.11646	0	0	0	0	0.739501	0	0	0	1.22598	0
WP_014256388.1	MKTLSIQNRIKVTVNGREIEVYDNLTILQALIQEDIHIPHLCYDIRLERSNGNCGLCVVTIIEPNGEREVKACQTPIKEGMVICTNSPKLENYRKVRLEQLLSDHNADCVAPCVMTCPANVDIQTYLRHVGNGNFEAAVRTIKERNPFPVVCGRVCPHPCEAACRRNLVDSPVAINYVKRFAADWDMSQPTQWLPKKNPPTGKKIAIVGAGPSGLSAAYYSAIKGHDVTVFERQPKAGGMMRYGIPEYRLPKATLDKEIDLIRSLGVKIMTEKALGTHIRLEDLSKDFDAVYLAIGSWTPTPLHIEGENLDGVWLGIRFLEQVTKNAEINLGDTVVVIGGGNTAIDCARTALRKGAKSVKLVYRRTRDEMPAEPYEVEEALHEGVEMLFLMAPTKITSV…	[FeFe] Group A1	[FeFe] Group A1	Evolving	Labile	1	[FeFe]-centre, 3 x [4Fe4S] clusters, 1 x [2Fe2S] cluster	None	0.186077	0	0	1.11646	0	0	0	0	0	0	0	0	0	0
WP_014357048.1	MKEITFKINGQEMIVPEGTTILEAARMNNIDIPTLCYLKDINEIGACRMCLVEIAGARALQAACVYPVANGIEVLTNSPKVREARRVNLELILSNHNRECTTCIRSENCELQTLATDLGVSDIPFEGEKSGKLIDDLSTSVVRDESKCILCKRCVSVCRDVQSVAVLGTVGRGFTSQVQPVFNKSLADVGCINCGQCIINCPVGALKEKSDIQRVWDAIADPSKTVIVQTAPAVRAALGEEFGYPMGTSVTGKMAAALRRLGFDKVFDTDFGADVCIMEEGTELIGRVTNGGVLPMITSCSPGWIKFIETYYPEAIPHLSSCKSPQNITGALLKNHYAQTNNIDPKDMVVVSIMPCTAKKYEVQREELCTDGNADVDISITTRELARMIKEARILFNKL…	[FeFe] Group A3	[FeFe] Group A3	Bifurcating	Labile	4	[FeFe]-centre, 3 x [4Fe4S] clusters, 1 x [2Fe2S] cluster	NADH dehydrogenase, thioredoxin, thioredoxin	0	0.12325	0	0	0	0	0	0	0.739501	0	0	0	0	0
WP_014425762.1	MSEMNESQEMVKLTINNIPIEVPKGTKIMQAAQTIGIDIPHLCYHEDQRIKAHCRLCSVEVTGKKRLLAACSTEVWEGMDVHTDTQIVRDTQVSILQLMLANHHKDCLSCPRNQNCDLQRLCSRFNILESHLPSVVKEEPRIETNPSIVRDPSKCIRCGRCIRACKDVQGIAALTYAGRSSDIVVTTAFNKPMEATDCILCGQCSLVCPTGAIVEKDDTQKVLDALQDNTKHVIVQVAPSVRVALGDAFGLEPGAIVTGQMVTALKLLGFDKVFDTNFGADLTIMEEGHEFLHRLNNDGVLPMMTSCSPGWVNYMEKHFPSCIDHLSSAKSPMSMFGAIAKTYYAQQAGLKPQEIVTVSIMPCTAKKFEAARPEMGRDGYQDVDIVLTTRELIKLIKYV…	[FeFe] Group A3	[FeFe] Group A3	Bifurcating	Labile	3	[FeFe]-centre, 3 x [4Fe4S] clusters, 1 x [2Fe2S] cluster	NADH dehydrogenase, thioredoxin	0.134815	0.409396	0	0	0	0	0.808891	0	0	0.995132	0	1.46124	0	0
WP_014552161.1	MEPIITDKEKCRKCYCCVRSCPVKAIKVEKRYTEIIFDRCIGCGNCLSNCPQRAKMVADKVGVTESLLTSEDKVIAVLGSSFPAFFHNVAPGQLVAGLKRIGFREVHEGAYGAELIADDYARITGDNDRTYISSHCPAIVDLIERHYPKLLRNLVPVVSPMIAMGRYLKEVLGTKTKVVYISSCIAAKFETQMTETRGAIDIVLTYRELEGIFRSRQISLPALDALPFDGLAPTVGRLFPINEGTFRSFSMSADPLDTEIVSACGEVNVMGIIRDLAAGRIAPRFADLRFCYDGCIGGPGRNSELTEFYRRNLIINHYKQDIPYETAPHYLSSREQTGLDRSFASKHARLESPKTNDIKKILQATSKYSVKDELNCRACGYRTCREYAVAVYQGLAEIE…	[FeFe] Group C	[FeFe] Group C3	Sensory	Labile	1	[FeFe]-centre, 2 x [4Fe4S] clusters, PAS domain	Fusion with transcriptional activator	0.171781	0	0	0	1.03069	0	0	0	0	0	0	0	0	0
WP_014553773.1	MNKVKLTIDKQTIEVEEDSTVLDAAKEVGIDIPTLCYHPDLSLHGACRVCVVEDEESGNLLASCATPVRDGMEINTRSMKARKARRRNVELLLANHPNDCLGCDRNNHCELQDITYNLGIKSEEVAKFAGAKRELELDTTGPALKRDPNKCILCGRCVRICEEVQGVSALQFTERGFDSIVTTAFDLPQAEINCANCGQCATVCPVGAITEINEIDKVWAALEDDDRHVIVQTAPSIQATLGEEFGMETGTIVTGKMVAALKRMGFDKVFSTDFAADLTILEEGSEFLKKLNGEGELPHITSCCPGWVKFAEHNFPDLLKHLSSAKSPMQMFSALGKTYYPDQTGVDPEKIYTVAVMPCTAKKFEKDREEINGSDFKDTDAVLTTREFARMIKEMGINF…	[FeFe] Group A3	[FeFe] Group A3	Bifurcating	Labile	4	[FeFe]-centre, 3 x [4Fe4S] clusters, 1 x [2Fe2S] cluster	NADH dehydrogenase, thioredoxin, thioredoxin	0	0.12325	0	0	0	0	0	0	0.739501	0	0	0	0	0
WP_014559401.1	MVQLTINGIKVNAEEGMTILDAAKSVGITIPTLCHMKNLFPSGACRICSVEVEGFKGLTPACAYPVSDGLVVETDSPRVRKARKTIVELLVENHPQDCLICVRNKNCELQDLSERYGVREHRYVGETKSHAIDISSASMERDPAKCILCGRCVRACHEVQKIGAIDFTKRGFASIVTTPYNKGLNVSDCILCGQCILVCPTAALREKSSVKEVASALYDRKKYCIAQVAPAVRASIGEEYNMPLGTDVTGLLVTGLRRLGFKKVFDTNFAADLTIMEEASELINRIQNGGSLPMFTSCCPGWVKYAEMNNPEILDHISTCKSPHEMEGAVLKTYYAKKMGIDPKDIFVVSIMPCTVKKYESARPELKEEVLPDVDAVLTTRELVRFFKIAGIDFNDLPE…	[FeFe] Group A3	[FeFe] Group A3	Bifurcating	Labile	3	[FeFe]-centre, 3 x [4Fe4S] clusters, 1 x [2Fe2S] cluster	NADH dehydrogenase, thioredoxin	0	0.204329	0	0	0	0	0	0	0	0	0	0	1.22598	0
WP_014639275.1	MSMSEEKLGQHYLAALNEAFPGVVLDHAWQTKDQLTVTVKVNYLPEVVEFLYYKQGGWLSVLFGNDERKLNGHYAVYYVLSMEKGTKCWITVRVEVDANKPEYPSVTPRVPAAVWGEREVRDMYGLIPVGLPDERRLVLPDDWPDELYPLRKDSMDYRQRPAPTTDAETYEFINELGDKKNNVVPIGPLHVTSDEPGHFRLFVDGENIIDADYRLFYVHRGMEKLAETRMGYNEVTFLSDRVCGICGFAHSTAYTTSVENAMGIQVPERAQMIRAILLEVERLHSHLLNLGLACHFTGFDSGFMQFFRVRETSMKMAEILTGARKTYGLNLIGGIRRDLLKDDMIQTRQLAQQMRREVQELVDVLLSTPNMEQRTVGIGRLDPEIARDFSNVGPMVRAS…	[NiFe] Group 4a	[NiFe] Group 4a	Evolving	Sensitive	6 or 9	[NiFe]-centre, 1 x [4Fe4S] clusters	NuoL, NuoH, two [FeS] proteins, (three antiporter subunits)	0	0.829277	0	0	0	0	0	0	0	4.97566	0	0	0	0
WP_014792559.1	MDKINLKIDGIQVSVPKGTTILQAAKEYKVNIPTLCFMQGVHEPGSCRICVVEVEGWRGLQPACVTKVEEGIVVKTAGKLVRETRKELLELILANHNRECLSCARNQKCELQKLAEDFGVSSVSYEKKAARAEMDEWGPIVRDSSKCILCGRCVSICSNTQKVNAIEIAQRGAHTTVTTPYEEALSGRSCINCGQCIKICPVGALQERDDSDKVWSALEDPELHVVVQTAPAVRVALGEEFGLPVGINVRGKMVTALRRLGFDKVFDTTFSADLTIMEEGTELLQRIQQGGKLPLITSCSPGWVKFCEHNFTDFLDNLSSCKSPQQMFGAVAKSYYPQKAGLDPKKIFVVSVMPCTAKKYEADREEMMVQGRKDVDAVITTRELAKMIKQAGINFNDLE…	[FeFe] Group A3	[FeFe] Group A3	Bifurcating	Labile	4	[FeFe]-centre, 3 x [4Fe4S] clusters, 1 x [2Fe2S] cluster	NADH dehydrogenase, thioredoxin, thioredoxin	0	0.17394	0	0	0	0	0	0	0	0	1.04364	0	0	0
WP_014902186.1	MASKAVKNLSRRSFLKFVGGTAGLVGISLNLTGCGDPATADEAIGGNGWMPTQYNAPGNWPTNVRGRVPIDPANPAIVRDDQKCILCGQCIEVCERIQSVFGNYELPIKKDFVCVNCGQCIQWCPSGAISERDDINKVFKALADPNVTVVVQTAPATRIGLGEEFGMPVGTNVQGKQVAALRKLGFDVVFDTNFTADLTIMEEGTELVKRVTGELHHPIPQMTSCCPGWVKFVEYFYPELIPNLSSAKSPQQMEGALIKTYFAEKKEVDPKKIFSVSIMPCTAKKFECQRPEMNSASKELNDSNVSPDVDVVLTTRELARMIKRAGIDFASLPEEEYDKLMGTGTGAGVIFGTTGGVMEAAVRSAYFLITGQQPPAALWNLTPVRGMQGVKEAAVNIPG…	[FeFe] Group A3	[FeFe] Group A3	Bifurcating	Labile	3	[FeFe]-centre, 2 x [4Fe4S] clusters	NADH dehydrogenase, thioredoxin	0	0.12325	0	0	0	0	0	0	0.739501	0	0	0	0	0
WP_014905079.1	MDIQLTINDIPLTVPAGMSILDAARTINIDIPTLCYLNLHEMRLNNHIASCRVCVVEVEGRRNLAPACSTPVFDGMVVKTDTQRAVLGRRTMVELLLSDHPKSCLTCPKNLDCDLQALAADLGVRNITYEGEESEFPIDKSSLAIIRDPNKCIRCRRCETMCNDVQTVGVYSAVGRGFETVVKTAFDLPQHETSCTFCGQCVAVCPTGALMELDQVDKVWKALNDPTRYVIVETAPAVRVALGEGFGLEPGTIVTGRMVAALRRLGFDRVFDTEFGADVTIMEEATELIHRIEHGGRLPILTSCCPAWVKFFEHQFPDLLDIPSTCKSPHQMLGVLSKSYYAETYGIDPQKITVVSIMPCIAKKYEAARPELGQDPVTPDVDIVITTRELSRMIREAGI…	[FeFe] Group A3	[FeFe] Group A3	Bifurcating	Labile	3	[FeFe]-centre, 3 x [4Fe4S] clusters, 1 x [2Fe2S] cluster	NADH dehydrogenase, thioredoxin	0.134815	0	0	0	0	0	0.808891	0	0	0	0	0	0	0
WP_015327873.1	MSTITLTIDGQQVEVEQGSTILDAAKKLEIDIPTLCYHPDLSLFGSCRVCVVENAKTGDLLASCVAPVADGMEIKSHSTKVRRARRTNVELLLANHPNECLTCERSGTCELQGLTEKLGINEIRFEGEQTKHPIDEFGPSIKRDPNKCILCGRCVRTCEEIQGVSALDFTQRGFDSVVTTAFDLPQAEINCANCGQCVTVCPVGALTEVSEVDKVWQALEDENQHVVVQTAPSIQATMGEPFGMEPGTVVTGKLATALNQLGFDRVFSTDFAADLTIMEEGSELLARLEDKESNTPQITSCCPGWVKFCEHNYPELLDNLSTAKSPMSMFSPLAKTYYAETKDLEAEDIYTVSIMPCTAKKFEKERGELQDSGTQDTDAVLTTRELARMIKEAGIKFAE…	[FeFe] Group A3	[FeFe] Group A3	Bifurcating	Labile	4	[FeFe]-centre, 3 x [4Fe4S] clusters, 1 x [2Fe2S] cluster	NADH dehydrogenase, thioredoxin, thioredoxin	0.237475	0	0	0	0	0	0	1.42485	0	0	0	0	0	0
WP_015337360.1	MLNSNQLIHIDKELCTGCGRCKEVCPVEAISGVQGEPHSIDHARCVICGQCIQTCSAYGSILEEPDTPLAEKLHERGMFRSVEEPLFAAYCTGNAPEVMKELRSDKLSLVQCAPAVRTAIGEDFGMPAGSLTPGKMAAALRRLGFDRVYDTNFAADLTIMEEGNELLSRISNGETLPMFTSCCPAWVRFMELNYPDLLGHLSSCKSPQQMSGALFKTYGADIDNRKPEEIFSVSVMPCTCKKYESSRPEMKNNGLRDVDAVITTRELGYMIKEAGIDFTTLPAEDFDRPLGTYTGAGNIFGVTGGVMEAALRTACELVTGKPVPETDLIFVRGEAGMRTASMDMNGTTFRVAVVAGLTNAIALLEKVRTGKAEVDFVEVMCCPSGCISGGGQPKVLLPA…	[FeFe] Group A4	[FeFe] Group A4	Evolving	Labile	3	[FeFe]-centre, 2 x [4Fe4S] clusters	FeS protein, FeS protein	0.186077	0	0	1.11646	0	0	0	0	0	0	0	0	0	0
WP_015337634.1	MSGCAPKSRPVGTIAVQPAVNENTKRMEGVEYSMYAPPVGVDSDTIAFVRVDEAKCEACGACEEFCASGAIQQINDDGIHQVVDPVACMNCGQCLTNCPYGAIYEGVSFVDELLEKLKDPDTVVVSMPAPAVRYGLGECFGAATGTYVGGKMHSALRKLGFDYIWDTEFAADLTIMEEGTELIQRVKDQGKKGTLPLPQFTSCCPGWIKFTETFYPDLIPHLSTCKSPIAMLGPLCKTYGAKETGTDPKKVYTVSIMPCIAKKFEGVRAELDDSGYRDIDATINTRELAYMIKKAGIDFNSLPDEDADPVLGESTGAATIFGNSGGVMEAALRLAYEELSGQKLQNPDIKVVRTHEGIKTADINVPNFGTVKVAVASGLANAAKLCDEVRAGKSPYHFI…	[FeFe] Group A1	[FeFe] Group A1	Evolving	Labile	2	[FeFe]-centre, 2 x [4Fe4S] clusters	Small subunit	0	0.15538	0	0	0	0	0	0	0	0	0	0	0	0.932283
WP_015390585.1	MFQFENRLLKLKHEVLTRVVVLAKENKLCKEELEKIPFEMIVGDEPNYRETVDRERNIVLERAKLAAGYMPNGKNGQELVEIDEEKQILYVIKEACDRCPTNKFQVTDSCRNCVAHKCQSVCNFGAISYVNGKAYIDPDKCKECGMCNKVCPYDAIAEDMRPCKKACPTGALSYNADDLRAEITESKCVNCGACMSECPFGAIEDKSSLVRVVNRLMEKENIYAIVAPAITGEFGAKTTYGQVKNAIKALGFTDMVEVACGADAVTVHESTEFVERMEKGDSYMTNSCCPGFLSYIEKMMPDQAERISGTVSPMVATGRYIKAKHKDAKVVFIGPCTAKKSEVLIESIKDAVDYALTFEELIALFDAFEIDPEKCEDIVVDQASIFGRNFAVGGGLTAA…	[FeFe] Group B	[FeFe] Group B	Evolving	Labile	1	[FeFe]-centre, 2 x [4Fe4S] clusters	None	0.487781	1.01973	1.18357	0	1.03069	0	0	0.712424	0.739501	0.995132	0	4.38373	0	0
WP_015392538.1	MSKHMSTEVRVPIEPGNPSVMRIEEKCIKCGQCKTICKDYIGVLGYYDLSKTNDIPICINCGQCANVCPVDSIIETYEFREVMEAINDKDKIVIVNTSPSVRVSLGEEFGMEDGSFVQGKMVALLRKLGVNYVLDTNFGADLTIMEEASELIERVKKNKNLPQFTSCCPAWVKFAETYYPEIIPNISTSKSPIGMQGPTVKSYFAESMDIDPKKIVNVALTPCTAKKFEIRREEMKDAGNYLDIDDMRDMDYVITTRELALWAKEKGIDFNSLEDSEFDRVMGEASGAGVIFGNTGGVMEAALRTAYEFITKEKVPDTLYDLKPVRGMEEMKEASLDIGDITLNVAVIYGTDNVRKMMDKLKTSDKQYHFIEVMTCPGGCIGGGGQAKHRIDKIKEANE…	[FeFe] Group A1	[FeFe] Group A1	Evolving	Labile	1	[FeFe]-centre, 2 x [4Fe4S] clusters	None	0.186077	0	0	1.11646	0	0	0	0	0	0	0	0	0	0
WP_015394438.1	MIGQFMTIDNIPVEIQDEKNILELVRKAGIELPTFCFYSELSVYGACRMCMVETKRGDIESACSTPPRAGMEIFTNTPRLRKYRKNILELLLANHCRDCTTCQQSGACKLQELAKRFGINDVRFPNTAPDVELDESSVAIVRNKSKCILCGDCVRVCEEVQNVGAIDFVGRGSKMTVTTAFDEPIGHSNCVSCGQCAAVCPTGAIVVRSNTEKLWQDLNNPKKRVVVQIAPAVRVGLGTQLGEEDGRNAMGKMAAALRRMGFDKIFDTSVGADLTVIEETNEFVSKLQNNEALPLFTSCCPAWVNYAEKTYPELMKNVSSCKSPMGMFAAVLKEHYREDDRELVSVAIMPCSAKKFEAAREEFKNDGVPDVDYVVTTQEFVNMVNESGIAFSELEPEAL…	[FeFe] Group A3	[FeFe] Group A3	Bifurcating	Labile	3	[FeFe]-centre, 3 x [4Fe4S] clusters, 1 x [2Fe2S] cluster	NADH dehydrogenase, thioredoxin	0.662672	0.70998	0	2.23292	1.03069	0	0	0.712424	0	1.99026	1.04364	0	1.22598	0
WP_015513468.1	MKVIDFKNASCKHCYKCVRSCSVKAIKVKDAQATIMDDHCVLCGTCLEVCPQNAKTFVSDLEKVKAFITMGEKTIVSLAPAYLGIFDYDKPGQVVDALLRLGFSEVRETAEGAAYVTEAYARLLEEGQMKNIISTCCPSVNELVEKYYPELVEYMAPVVSPMIAHGKLIKSMYGPDVKVVFVGPCIAKKQEAEGDDRTTGFVDAVLNFEEIESWLQERDISIRECEGKQPTNPDPKVNRLYPVTSGVISSVLAKKKVDSYKKIFVDGIEDCREVFEDMKKGLIDGCFIEANMCEGGCVKGPAVNKLHISKYKATMVIEEQVEKQDPAYSQLAGNIDISKHFRSERIQDEMPTEEQITRILKATGKYNKTQELNCGACGYPTCRDKAIAVFQGKAEQEMC…	[FeFe] Group C	[FeFe] Group C3	Sensory	Labile	3	[FeFe]-centre, 2 x [4Fe4S] clusters, PAS domain	Phosphatase, thioredoxin	0.137755	0	0	0	0	0.826529	0	0	0	0	0	0	0	0
WP_015515272.1	MKTTFITDINKIKFEVNTEVARLAFAGELDEKANEIPYKLIPGRTPHYRCCVYREREIIRERVQLAMGRSAMSGQKNKNIVQVIEAACEGCPINRFNVTNNCQMCMAKKCLGACNFGAIKFEGGHAVIDHKKCKECGKCAEACPYNAIADLMRPCKRSCPVDAITMDEDNIVVINEEKCINCGQCVINCPFGALSDRSFMVDVIKLISSGAPVYAMVAPAIEGQFGPDVSVGMIREAVMKLGFRDMYEVSLGADFVSKNEGQELLEHYEAGEKMTTSCCPAFVSLIKKHYPQVLKYMSTTVSPMTATGRLIKAMHPDAVCVFIGPCIAKKSEVIDSITFGGADYAMTYEELASMFEAKNIDPEECTETMQQGSKFGKQYSVSGGVTAAVLETFKEANKE…	[FeFe] Group B	[FeFe] Group B	Evolving	Labile	1	[FeFe]-centre, 3 x [4Fe4S] clusters, 1 x [2Fe2S] cluster	None	0.628782	0.278631	0	0	0	0.826529	0.808891	2.13727	0.739501	0	0	0	0	0.932283
WP_015528256.1	MGIMTIDGQVIEFTDEPNVLSVIRKAGIDIPTLCYHSELSIYGACRLCTVEDDRGKTFASCSEKPRDGMIIYTNTPRLMRYRKLILELLLAAHCRDCTTCIKSGECHLQELAHRMGVHEIRFENVREIQPIDTSSHAIIRDPNKCILCGDCVRMCDNVQNINAIDFAYRGTDAQVIPAFNKKIAETDCVGCGQCRVVCPTGAISIHTNIDEVWEALADKNTKVIAQIAPAVRVAIGDNFGYAKGENVMGKLVGVLHRLGFDEVYDTSYGADLTVVEESKEFIERFTSGEKMPLFTSCCPAWVKYCENKYPEFVPNLSTCRSPQQMFGAVVREYYKDPEKNEGKKIVSVSIMPCTAKKEEILRPESYTNGKQDVDYVLTTTEIVRMIRKSGIVFDKVEIE…	[FeFe] Group A3	[FeFe] Group A3	Bifurcating	Labile	3	[FeFe]-centre, 3 x [4Fe4S] clusters, 1 x [2Fe2S] cluster	NADH dehydrogenase, thioredoxin	0.409256	0.626511	0	0	1.03069	0	0	1.42485	0.739501	0	2.08728	0	0	0.932283
WP_015528722.1	MVNITIDNQKISVPSGTTIMEAAAKLGTPIPKLCYLKDINEIAACRVCVVEIEGKDRLVTSCNNVVTEGMVIYTNSPKVRIARRQTVQLILSQHDCKCATCVRSGNCTLQQVANDLNLIDLPFKERFEDTPWDKTFPLIRDSRKCIKCMRCIQICDKIQGLNIWDVTSTGSRTTINVNGNKKINEVSCSLCGQCITHCPVGALRERDDTEDVWSAIADKKKVVVAQVAPAVRAAWGEALGLSREEATSGKIMDALKKIGVDYVFDTSFSADLTIMEEGNEFLQRFTKGELKLRPMFTSCCPGWIRFIKSQYPHLVPQLSTAKSPQQMFGAIMKTYFAQSIGVAPEDIYTVSVMPCVAKKGERNMELFYGEYAGHDIDTVLTTRELTRMIRAAHIDPKIL…	[FeFe] Group A2	[FeFe] Group A2	Evolving	Labile	2	[FeFe]-centre, 3 x [4Fe4S] clusters, 1 x [2Fe2S] cluster	NADH-dependent glutamate synthase	3.34919	8.95886	1.18357	1.11646	3.09206	4.95918	4.04446	5.69939	45.1096	1.99026	1.04364	4.38373	1.22598	0
WP_015539897.1	MTRSVIDPITRIEGHLRVEMEVTNGKVSDAWVSGGCFRGMEMVVENRTPEDAAQIVQRICGVCPVSHAHSSAIAAEKAYGIKISNNARIIRNLLEGAQFLHSHILWFYNLAALDYVNPLNALKADAADAYDLAQAAGTSTNSDFVALKERLSNFADNGQLSIFSGNWFDAEDGTGYKLPPELDLICTAHYLEALQMQAKASQVSAIIGGKMPHVMTLIPGGTAFVPTDQKLDDLKYLVDEIYDWVEATMIPDTLAIAPYYIDALNWGKGCGRYVAWGVFENESMELKDRYLPMGVIDDKLNLSDVKEELITEYMGHSWYKGEETYTSPYFVTEPEFTSYDVNDRYTWVKCPAYDGKPYEAGGLSRVLAAYKRNVPFIVEQVDGLLEALGAPGQIGVAQS…	[NiFe] Group 1a	[NiFe] Group 1i	Anaerobic Uptake	Sensitive	3	[NiFe]-centre, 3 x [4Fe4S] clusters	Cytochrome b	0.423551	0.12325	0	1.11646	0	0	0	1.42485	0.739501	0	0	0	0	0
WP_015556986.1	MGTMIINGRPVEFTDEKNVLAVIHKAGIDMPTLCYYSELSTYGACRMCVVEDARGKIDSSCSMEPRDGLEIRTNTARLLRYRRMILELLLAAHECDCTVCSKSGSCRLQMLAHRYGVKRVRFEDTRERLPQDESSYAIVRNPNKCILCGDCVRVCREIQGMGILDFVNRGSEARVRPAFNEPMIHTRCISCGQCAAVCPTNAIRVRRHIDDVWKAIFDPKKRVVAQIAPAVRVALGERFGLEPGVNSIGKVVAALRTLGFDHVTDTTLGADFTVMEEAAELMQRLEDGGPFPMFTSCCPAWVKYCENCAPDLLKHLSTCRSPMQMFSPVIKAYYAQAEADGRETCSVAIMPCAAKKMEAAREEFRTNGVPDTDYVLTTQELIEMIEEAGIDFDALVDLA…	[FeFe] Group A3	[FeFe] Group A3	Bifurcating	Labile	3	[FeFe]-centre, 3 x [4Fe4S] clusters, 1 x [2Fe2S] cluster	NADH dehydrogenase, thioredoxin	0.885416	0.976395	2.36715	2.23292	0	0	0	0.712424	1.479	0.995132	0	0	2.45195	0.932283
WP_015707165.1	MAVIQIDKDICTGCQECTKVCPVYAIEGNPGEAQTLVAERCVMCGQCVQKCKSYVSLIDHGPEMYNKKREERMLPETVREPLFAAHNVSHLAEVIKALGDPSLFTIVQAAPAVRVGIAEDFGLPLGSLASGKMAAGLRRLGFKKVYDTNFSADLTIMEEGTELVKRVTEKGVLPMFTSCCPGWVRYMENNHPELTKHLSSCKSPQQMAGAVFKTYGAKLDGVKGAKVYNVSVMPCTCKTFEAARAEMNSSGWQDIDVVITTRELGYLLKYKGIDLATLPDEEFDMPLGEYTGAGAIFGVTGGVMEAAIRTGYTLITGKELKDVDINAVRGSDGFRRAEIKAGDLTLKVGVVTNLKNIDPVIEQLQAGTLDAHFVEVMTCPEGCISGGGQPKLLSDTDVP…	[FeFe] Group A4	[FeFe] Group A4	Bifurcating	Labile	6	[FeFe]-centre, 3 x [4Fe4S] clusters, 1 x [2Fe2S] cluster	NADP dehydrogenase, four FeS proteins	0	0.12325	0	0	0	0	0	0	0.739501	0	0	0	0	0
WP_015710039.1	MTEYLNLKAADCKNCYKCIRHCPVKAIQFTGNSAQIIPEECILCGRCFVVCPQNAKEIRNDVSIAEALIGSGAPVYASLAPSFAANYTDESSHALSIEQMETALKELGFAGAEETALGAAIIKRQYDEMVKREDKNIVISTCCHSVNLLVQKYYPEALPYIAPLLSPMQAHSVDLKRRYPGAKTIFIGPCISKKDEADRYGGIVDCVLTFAELSQWFKQKRIDIGKCAPRNTESPVTHTLTRLFPVTGGILRTMAKENPQYTYLAIDGVTNIQRALEDIIKGKLDKCFIEMSACTGSCIGGPSMQNVAATNGIQRNTAPVRDYIAINAYAGSEDDPVFAYDTKTLSKSFPSLAVRKVHLGQNAIDEVLRKIGKTKPEHELNCGCCGYNTCRDKALAVLE…	[FeFe] Group C	[FeFe] Group C3	Sensory	Labile	3	[FeFe]-centre, 2 x [4Fe4S] clusters, PAS domain	Phosphatase, thioredoxin	1.30063	0.691421	1.18357	3.34938	0	1.65306	1.61778	0	0	1.99026	0	0	1.22598	0.932283
WP_015713064.1	MSGTKLTPVIKVDDEKCVNCYACVAACPVKYCMDGTGDAPKINHDLCIGCGNCITSCKRGARSFFDNGDAFFRDLGRGEKIVAIVAPAAASNFEGRYLNLNGYLKSLGVQAVFDVSFGAELTVLSYVNYMKEKKPSLVISQPCPAIVTYIELFVPSLLPMLAPADSPMLHTIRMIKEYYPQYRNHKVAVISPCIAKRREFDETGLGDYNVTFITIKGQLEKEKKDLASCKAMEYDNPEAERAVTFPMPGGLLRTADREVPGIWEQTRKIEGPEAIYPYLDHLADSLKKGGHQSVSFVDCLNCEKGCNGGPGTGFWEEPQNELEYPIQQRAVEAEKKYTLKSQKKSRKELAKVLNKYWKPGLYGRNYVDLSGNYTIREPSPAELTEVYKKIGKYSEDDIY…	[FeFe] Group C	[FeFe] Group C2	Sensory	Labile	1	[FeFe]-centre, 2 x [4Fe4S] clusters, PAS domain	Fusion with methyl-accepting chemotaxis protein	0.26963	0	0	0	0	0	1.61778	0	0	0	0	0	0	0
WP_015724590.1	MDNNSTNDLPVSRRFFLKGLGTAGMAGALATLSGCKDAGKPVGGEGWTPQQYNAPGSWPVQVRGRVPIDPNNPSIVRDDRKCILCGQCAEACERVQSVEGFYGLPIKDDITCVNCGQCALWCPTGAISERDDIERVLKVISDKNLHVIVQTAPATRIAIGEEFGMPAGSIVEGKMVAALKLLGFDRVFDTNFSADLTIMEEGTELVNRIKAAGGHGEGGHGHAPTALPQFTSCSPGWVKFCEYFYPDLLDHMSTCKSPQQMLGSVAKTYYAKKKGIDPKQIVSVSIMPCTAKKFEAARGEMNSAGIMAGTPELRDVDFVLTTRELARMIKGKGIDLAKLDPQPYDSLMGEGTGAAVIFAATGGVMEAAIRSGYYLLTGENPPEALLNLAAVRGLQGVKE…	[FeFe] Group A3	[FeFe] Group A3	Bifurcating	Labile	3	[FeFe]-centre, 2 x [4Fe4S] clusters	NADH dehydrogenase, thioredoxin	0	0.24354	0	0	0	0	0	0	0	0	0	1.46124	0	0
WP_015739747.1	MVSLIIDGQKVEVPRGTTILEAAKKVQVNIPTLCYLKDIGHDVGACRICVVEVEGQRDFVTACNTPVEEGMVVRTNTPAVREARRMTLELILANHPMECPTCPRNGNCELQNLAATLGIREVRFPRVRREFPVDDSSAAIIRDPNKCIVCRRCVTVCENIQTVGVLELQKVDGQAIVGVKGGVPLAETNCVQCGQCALVCPVGAIYERDDTDKVWAALADPTKHVVVQTAPAVHVTIGEMFGLPVGTDATGKIVAALRRLGFDAIFDTNFAADLTIMEEGTELLERIEKGGVLPQFTSCSPGWIKFIEHFYPELIPHFSSCKSPQQMLGPVVKTYYAQKKGIDPKDVFMVSIMPCTAKKFEAARPEMNASGYRDVDVVLTSRELGRMIKEAGIDFANLP…	[FeFe] Group A1	[FeFe] Group A1	Evolving	Labile	1	[FeFe]-centre, 3 x [4Fe4S] clusters, 1 x [2Fe2S] cluster	None	0	0.17394	0	0	0	0	0	0	0	0	1.04364	0	0	0
WP_015739748.1	MADVCLTIDGFSVTVPEGTTILKAARQVGVKIPTLCYLEGINEVGACRICVVEVEGREELVTSCNTPVEEGMVVRTNTPAVREARRMTLELILANHPMECPTCPRNGNCELQNLAQQLNIRTVRIPALPRKELPLDTSTVAIIRDPNKCIVCRRCESVCHNIQTVGAIALQGKGFAATVAPVGGRYLDETNCVQCGQCALVCPVGAIYERDDTDKVWAALADPTKHVVVQTAPAVHVTIGEMFGLPVGTDATGKIVAALRRLGFDAVFDTNFAADLTIMEEGTELLERIEKGGVLPQFTSCSPGWIKFIEHFYPELLPHVSTCKSPQQMFGAIVKTYYAQLKGINPANIVSVSIMPCTAKKFEAARPEMNASGYRDVDVVLTSRELGRMIKEAGIDFAN…	[FeFe] Group A3	[FeFe] Group A3	Bifurcating	Labile	3	[FeFe]-centre, 3 x [4Fe4S] clusters, 1 x [2Fe2S] cluster	NADH dehydrogenase, thioredoxin	0.423551	0.204329	0	1.11646	0	0	0	1.42485	0	0	0	0	1.22598	0
WP_015750727.1	MAGCKAQKAPAVPVTPQSSYSGPIVIDPVTRIEGHLRVEVEVDNGKVSNVWSSSQLFRGLETILKGRDPRDAQHFTQRSCGVCTYVHALASTRCVDNAVGVKIPENAHLVRNLVLSAQYLHDHIVHFYHLHALDWVDVTSALKADPAKAAKIANNISPRVTKAEDLKAVQQKLQSFVDSGQLGIFTNAYFLGGHEAYYLPPEVNLIATAHYLEALRLQVKAARAMAVFGAKNPHTQFTVVGGVTCYNSLTPERISEFKSLYEETRKFVEECYIPDLLAVAGYYKDWGSIGGCTNFLSFGEFGNDDYSMADNYIPQGVIMNRNLGQVTDFDPNAIAEHVKHSWYKDGPAKHPYEGVTEPQYTSLEDKDRYSWMKAPRYQGEAMEVGPLAHVLVAYARGHK…	[NiFe] Group 1b	[NiFe] Group 1b	Anaerobic Uptake	Sensitive	3	[NiFe]-centre, 2 x [4Fe4S] clusters, 1 x [3Fe4S] cluster	Cytochrome	0	0.12325	0	0	0	0	0	0	0.739501	0	0	0	0	0
WP_015760489.1	MTKTAIHVDHIARVEGHGNVHVVIEDGEVKTVEMNVVEPARLFESMVRGRRFEEIPYISSRICGICSSSHVVTDLKAIERVFGVEVTDRTRALRELLVYGSYLQNHASHLFVFAAPDFLGMPSVFPLAQTDPELFEQALGLKALGNELCTKVGGRSIHPITAVVGGFTHEIEPAEYLELADKMDAAMDFALEAVDLFRGFEVPDIATAGDMLAMVEDDYYPVECSDQAFFLNAGIVFDANEVQEHIEEHAVPHSAALLARVRETQSPYFTGALARVNASWQNLGQNAKVAAAKAGLRPPEANPFMNNVAQAVEIVDALDRCADLCRKLAEPGAIASSSLPVPFEVKAGRAVGFTEAPRGALFHDLTLDAEGRVTHASILTPTAQNVANLEADMRLLAEK…	[NiFe] Group 3b	[NiFe] Group 3b	Bidirectional	Tolerant	4	[NiFe]-centre, 3 x [4Fe4S] clusters	Diaphorase, [FeS] protein	0.523183	0	0	0	0	0	2.42667	0.712424	0	0	0	0	0	0
WP_015760641.1	MGKATVIPFGPQHPVLPEPLHLDLVVEDETVIEAVPQIGFIHRGLEKLVETRDYNQFIYVAERICGICAFGHSMGYAETVEKLMGVEIPERAEYLRVIWHELSRIHSHVLWMGLAADAFGFESLFMHCWRLRERVLDIFEKTTGGRVIFSVVKVGGVVRDIDDAQFAEMKRVLEGIKDEYRQLCNAFLKDSSVKNRTVGVGYISHEDALAQSMVGPFARASNVNYDARMLGNGGYGFLSDFQPVLDGQGDCYARVKVRALEVLQSIDIIEEMIAKIPAGDIAVDVKGSPAAGAEAANVVEQPRGECYYYARGNGSKFLDRMRMRTPTSQNLAGMATALAGCDLADVNMIVLTIDPCISCTER	[NiFe] Group 4e	[NiFe] Group 4e	Evolving	Sensitive	6	[NiFe]-centre, 1 x [4Fe4S] clusters	NuoL, NuoH, NuoC, [FeS] protein	0.55102	0	0	0	0	3.30612	0	0	0	0	0	0	0	0
WP_015778015.1	MLKLKINNREVEVNEGSTILEAASILNIKIPTLCHMDLHDIKFVNKLASCRVCLVEDIDKDKLIPSCATFVKEGMNIRTDSKRVIRARRAIVELLLSDHPSDCLKCAKNLDCTLQELACDLNIREIRYRGEMRSLPIDDNSYSLIRDPNKCILCRRCETMCNEVQTVGALAEVGRGFYTHVGSTFNRSMFETTCTFCGQCLSVCPTGALTEKSNIPEVWRALSSDKHVIVQVAPAVRVALGEMFGIRVGTNVEGKIVTALRRLGFDRVFDTNFAADLTIMEEANEFVDRLKGKGELPILTSCCPGWVNFMEQQFSDMIDIPSTCKSPHEMFGAIAKSYYAEKEGINPEDIVVVSVMPCISKKYEAKRDELENEGYSDVDTVITTRELAEMIKEVGIDFA…	[FeFe] Group A3	[FeFe] Group A3	Bifurcating	Labile	3	[FeFe]-centre, 3 x [4Fe4S] clusters, 1 x [2Fe2S] cluster	NADH dehydrogenase, thioredoxin	0.186077	0.55221	0	1.11646	0	0	0	0	0	0	2.08728	0	1.22598	0
WP_015869123.1	MRNVITTELTKLRRQIYIKLLQKIISGKYNEIPKISKEIIKEGSIPQGQDVYKTKITIDETIKIILGTDYSKTKDLELYELIPEMEAILKGESPLMNKSGKVINIIREICDGCPLPSYHITDMCRNCSAKYCINSCPRNAIPIVDGKPKIDSEKCVGCGLCAKNCPYGAIIKIQRPCVSACAVGATYSDENGFVLIDDEKCVQCGECAVACPFGAIVESSSIGQVAVRLGKEPMVAIFAPASVAQFGPRVSLGQFKKALKEVGFVDAFEVAIGADMVAKEEAEYVEENLERLGFITTSCCPAFKRMIETRFPELVEHISPSLSPMHMLAKKIKEDYPNAKVVFIGPCIAKKYEVTLQPYTDYALTYEEIASIFAVKGIEPANVEEEELNNATPYGRLFA…	[FeFe] Group B	[FeFe] Group B	Evolving	Labile	1	[FeFe]-centre, 2 x [4Fe4S] clusters	None	0.332078	0.24354	1.18357	0	0	0	0.808891	0	0	0	0	1.46124	0	0
WP_015872618.1	MSYQYQTQGYTLSDAGRRLVVDPITRIEGHMRCEVNINDQNIITNAVSCGTMFRGLEIILQGRDPRDAWAFVERICGVCTGVHALASVYAIEDAIGIKVPDNANIIRNIMLATLWCHDHLVHFYQLAGMDWIDVLDALKADPRATSQLAQSLSSWPMSSPGYFFDVQNRLKKFVEGGQLGIFRNGYWGHPQYKLSPEANLMGFAHYLEALDFQREIVKIHTVFGGKNPHPNWIVGGMPCAINIDQSGAVGAVNMERLNLVQSIITRTADFINNVMIPDALAIGLFNKPWSQIGTGLSDKCVLSYGAFPDIANDFSQKSLLMPGGAVINGDFANVLPVDLADPQQVQEFVDHSWYRYPNGQQGRHPFDGITDPWYNPGNVKGSATDIQQLDEQAQYSWIK…	[NiFe] Group 1d	[NiFe] Group 1d	Aerobic Uptake	Tolerant	3	[NiFe]-centre, 1 x [4Fe3S] cluster, 1 x [3Fe4S] cluster, 1 x [4Fe4S] cluster	Cytochrome b	0	0.15538	0	0	0	0	0	0	0	0	0	0	0	0.932283
WP_015918980.1	MRILSQNRETNSMGRCFALAEVTVVINGRTLNVPDNLTVLEACERAGVEIPALCHHPRLGESIGACRVCIVEVEGARNLQPACVTKVRDGMVIKTSSDRVKTARKFNLALLLSEHPNDCMSCEANGRCEFQDLIYKYDVEPIFGYGTKEGLIDKSSPAIVREISKCIKCQRCVRVCSEVQGMHIYSMVERGYRTYPGTPFDMPVYETDCIGCGQCAVFCPTGAIVENSAVKVVLEELEKKEKILVVQTAPSVRVAIGEEFGYAPGTVSTGQLVAALRRLGFDYVFDTNFGADLTIMEEGSEFLERLEKGDLEDLPMFTSCCPGWVNLVEKVYPELRTRLSSAKSPQGMLSALVKTYFAEKLGVKPEDIFHVSIMPCTAKKDEAMRKQLMVNGVPAVDVV…	[FeFe] Group A1	[FeFe] Group A1	Evolving	Labile	1	[FeFe]-centre, 3 x [4Fe4S] clusters, 1 x [2Fe2S] cluster	None	0	0.15538	0	0	0	0	0	0	0	0	0	0	0	0.932283
WP_015925732.1	MGTMIIDGQHIEFTDEKNILAVIRKVGIELPTFCYHSELSVYGACRMCMVEDKWGSTITSCSTPPKDGMEVWTNTDKLKKHRKMILELLLANHDRDCTTCEKSGRCKLQEIALKVGVKKVRFGQEKKEIPIDDMGPSVIRNPNKCILCGDCVRACQEIQGVGVLDFAYRGSNLQVTTAFNKSLQEVDCVNCGQCRVVCPTGALMIKKDIDRAYKALHDKNKRVIAQIAPAVRVAIGEDFGLQPGEISMGKIVSALRKLGFDQVFDTAVGADLTVIEEAEELMDRIQRKEKLPLFSSCCPAWFKYAEQKHPDLMENVSSCLSPQQMFGAVIKEQYKREKASDEKENVVIAIMPCTAKKYEAARPENTINGERQVDMVITTQELAIMIQENGIVFNELEDE…	[FeFe] Group A3	[FeFe] Group A3	Bifurcating	Labile	3	[FeFe]-centre, 3 x [4Fe4S] clusters, 1 x [2Fe2S] cluster	NADH dehydrogenase, thioredoxin	0.580602	0	2.36715	1.11646	0	0	0	0	0	0	0	0	0	0
WP_015925885.1	MDMVNLKIDGFDITVPKNTTILEAAKKLNIDIPTLCFMKGINEPGSCRVCVVEVEGWRGLHPACATKVFEGIVVKTASSAVREARKNILELIMANHNRECLSCPRNLKCELQTLCNDNGIDTIPYEGKVDKGCLDTSGPIVRDPNKCVLCGRCVSVCSKIQDVSAIDFAFRGANMTVTTAYEEGLASQECINCGQCIKICPVGALQERDDTEKVWKALENPDLHVVVQTAPAVRVALGEEFGFAPGTNVEGKMVAALRRLGFDKVFDTNFSADLTIIEEGNELINRIQNGGKLPLITSCSPGWIKYCEHNYHDFIENLSSCKSPQQMFGAIAKSYYPTKADVDPRKVFVVSVMPCTAKKYEADREEMSVDGLKDIDAVITTRELAKMIRQAGIKFEELE…	[FeFe] Group A3	[FeFe] Group A3	Bifurcating	Labile	4	[FeFe]-centre, 3 x [4Fe4S] clusters, 1 x [2Fe2S] cluster	NADH dehydrogenase, thioredoxin, thioredoxin	0.118737	0.289106	0	0	0	0	0	0.712424	0.739501	0.995132	0	0	0	0
WP_015943803.1	MKEVTKQQRIRVTVNGRQMEVYGDLTILQALLQEDIHIPHLCYDIRLERSNGNCGLCVVELGEGSEQQDVKACHTPIQEGMIIHTNSPRLEHYRKIRLEQILADHNADCVAPCVMTCPANIDIQSYLSHAGNGNFETAIKVIKERNPFPIVCGRVCPHSCEAQCRRNLIDEPVAINHVKRFIADWDIAHEQPWAPRKKAATGKKIAVVGAGSSGLSAAYYSAIQGHDVTVFERHPRAGGMMRYGIPEYRLPKETLDREIGLIADLGVKIMTNKALGTHIRLEDLHQDFDAVYLAIGSWRATPLQIEGDNLEGVWLGINFLEQVTKGADIKLGEHVVVIGGGNTAIDCARTALRKGAGSVKLVYRRTREEMPAESYEVEEAIHEGVEMYFLTAPHKIVAE…	[FeFe] Group A1	[FeFe] Group A1	Evolving	Labile	1	[FeFe]-centre, 3 x [4Fe4S] clusters, 1 x [2Fe2S] cluster	None	0.137755	0.705849	0	0	0	0.826529	0	0	0.739501	0	1.04364	0	2.45195	0
WP_016182069.1	MKEVMITINGKVCTAPEGSTILEAARVNNIEIPTLCFLKEINEIGACRMCVVEVKGARSLVTACVYPISEGMDIKTNSKKVFESRKTTLELILSTHERKCLSCIRSGNCELQKLCKEFNVADEDYFNGENCEYEFDDSAVHMVRNNNKCILCRRCVAACSKWQAVGVIGPNNRGFETHIGSAYEQNLSEVPCISCGQCIVVCPTGAIHEKDQTQEVWDALEDPTKHVIVQTAPSIRVTLGEAFNMPIGTNVEGKMIAALRQIGFDRVFDTNVAADFTIMEEANEFLERVGNNGPFPMFTSCSPGWVKYCEHYHPELIPNLSTCKSPQQMFGALAKTWYAEKEGIDPKDIFVVGIMPCTAKKFEVTREDEAAAGYSDCDVALTTRELARMIDKAGVRFVD…	[FeFe] Group A3	[FeFe] Group A3	Bifurcating	Labile	3	[FeFe]-centre, 3 x [4Fe4S] clusters, 1 x [2Fe2S] cluster	NADH dehydrogenase, thioredoxin	0	0.17394	0	0	0	0	0	0	0	0	1.04364	0	0	0
WP_016308610.1	MASTSITVEHMARVEGHGDIRLVIEGGQVTTCEMAVVEPARLFESMVRRRSYEEVPYIASRVCGICSSSHVVTDLRAIEAVFGVEVSDRTEALRELLVYGSFLQNHATHLFVFAAPDFLGHKSVFPLADVNPELLQKALGLKALGNELCTLVGGRSIHPITAVVGGFTHEIEPAEYLRLADAMDRARPFALECVDLFRDFDTLDVQTEGDLLAMVAPGAYPVCTSDTARFVRAGYDFAVDAVEEEIEEYPQHSSAAFLARARRTGRPYLTAALARVNASWDALCKDARYAAAKAGLRPPEYNPFANNIAQAVELVDVLDRCAALCRRLAADDFAGPSAPVPFTVCAGRGVGFTEAPRGALFHILDLDGEGRVERASILTPTAQNIANLEADMAQLAEKM…	[NiFe] Group 3b	[NiFe] Group 3b	Bidirectional	Tolerant	4	[NiFe]-centre, 3 x [4Fe4S] clusters	Diaphorase, [FeS] protein	1.03617	0.60325	0	0	0	1.65306	2.42667	2.13727	0	0	0	1.46124	1.22598	0.932283
WP_016308760.1	MGKATVIPFGPQHPVLPEPLHLDLVVQDETVVDVLPQIGFVHRGLEKLVETRDYNQFIYIAERICGICATGHSIGYAETVESLMGVEIPKRAEYLRIIWHELSRVHSHLLWLGLAADAFGFESMFMHCWRLRERVLDLFEKTTGGRVILSVVKVGGVVRDIDATQMAEIIAVLDGLKDDYTKIMNTLLTDASVKNRTVGVGHISTEDARSLSMVGPFARASNLPYDVRSFGKGAYGDLADFQPIVATEGDCYARVKVRCLEVLQSIEIIKELAAKIPAGDIEVAVKGAPADGAQASNVLEQPRGECYYYARGNGSKNLERMRIRTPTSQNLAGMTVALKGCDLADVNMIILTIDPCISCTER	[NiFe] Group 4e	[NiFe] Group 4e	Evolving	Sensitive	6	[NiFe]-centre, 1 x [4Fe4S] clusters	NuoL, NuoH, NuoC, [FeS] protein	0.650739	0	0	0	0	2.47959	0	1.42485	0	0	0	0	0	0
WP_016308995.1	MTRSVIDPITRIEGHLRVEMEVENGVVADAWVSGGCFRGMELVVQNRTPEDAAQIVERICGVCPVSHAHASSIAGDKAYGITISNNARIIRNLLEGAQFLHSHILWLYNLAALDYVNPLNALQANVDNAYAVALENGLALHSDLNQLYDKLGAFAANGQLSIFSGNWFDADNGEAYKLTPELDLILTSHYLEALKMQARASEMAALLGGKMPHVMTSIPGGNMWVPTESKLDDLLAMAIEVRDWVNDTVLADTVALAGPYAEALTFGKGCGRYIAWGVFEGNGWPYGDNYIEQMKNRYLPMGVLDENFGVTDVEESKIQEYMGHSWYKGDDTYTSPYFTTDPDYTDYNVDDRYTWVKCPTYDGKPMEAGSMSRIFAAYVRGVPFIKENVDAVLGILGAQ…	[NiFe] Group 1a	[NiFe] Group 1i	Anaerobic Uptake	Sensitive	3	[NiFe]-centre, 3 x [4Fe4S] clusters	Cytochrome b	0.663878	0.408659	0	0	0	1.65306	1.61778	0.712424	0	0	0	0	2.45195	0
WP_016310471.1	MVKKKAPLRVGETHVQAVRDTFPGAVLDAAWQAEDQVTVTVPKDMLPDVVEFLYYGRGGWLPNMVANDERPINGNYALYYLLSMEESDPGFVTVRAEVDPQSMEYPSVTPRVPACVWSEREAFDLFGLRAQGLPDERRLVLPDDWPADLYPLRKDSMDYRKRPAPVTDVENYSFLYEGQAEEVTEVPMGPLHITSDEPGHFRLFVEGEEIIDADYRLFYVHRGMEKVAESRLNYDAVTFLADRICGICGNAHSVAYAEAVEHAQGIEVPVRGQYIRAILLEVERLHSHLLNLGLVCHYCGFDTGFQHFFRVREKTMDLAVLLTGARKTYGLNLIGGVRRDILDEQKLATIKYVREIRNEVEALVDMLVSTANFESRTAGVGRLDPAVARDYSPVGPCVR…	[NiFe] Group 4a	[NiFe] Group 4a	Evolving	Sensitive	6 or 9	[NiFe]-centre, 1 x [4Fe4S] clusters	NuoL, NuoH, two [FeS] proteins, (three antiporter subunits)	0.256492	0.204329	0	0	0	0.826529	0	0.712424	0	0	0	0	1.22598	0
WP_016314690.1	MDTVKLWIDDIETEVPKGTTVLQAARGLGIHIPTLCHLQGMNHPSSCRVCLVESGPRLIASCTLVAEDGMRIRTNTPRVRKARKTTVELILSDHHRECLTCLRSGTCELQEVANQIGVRDVRYAGGQARSTVDFSSPSIVRDTSKCLLCGRCVSVCSEVQTVGAIGFMNRGFNTVIGPALGRPIGESVCVNCGQCIMACPVGALQERENVGDVWQAIADPHKFVVVQTAPAVRVALGEEFGMPIGTRVTGKMVAALRRLGFNKVFDTDFAADLTIMEEGTELMHRLATGENLPLMTSCCPGWVKFVEHFFPDMRENLSSCKSPHEMEGAMIKSYFAQMMGIDPGNLVVVSIMPCTAKKFEAQREELAHESFPDVDYVLTTRELARMIKEAGIDFVNLKG…	[FeFe] Group A3	[FeFe] Group A3	Bifurcating	Labile	4	[FeFe]-centre, 3 x [4Fe4S] clusters, 1 x [2Fe2S] cluster	NADH dehydrogenase, thioredoxin, thioredoxin	0.186077	0.17394	0	1.11646	0	0	0	0	0	0	1.04364	0	0	0
WP_016777708.1	MNLVKLTIDNKPVVVEQGTTILEAAKSIGIKIPSLCYMKMDDMNFENKPGGCRVCVVEVEGRRNLAPACKTECLEGMVVKTHTVRVINARRTVMELILSDHPAECLTCAKSGECELQDLAQNLGIREIHYTGEQSHYKGDRSPAIIREMDKCIMCRRCETACNEVQTVGVLSAVNRGFESVVAPAFEMDLDHSVCTYCGQCVAVCPTGALTERDYTWKVIEALVDPNKTVVVQTAPAVRAALGESFGMEPGTLVTGKMVAALRKLGFDYVFDTDFAADLTIMEEGTEFLDRLTRHLNGDKSVKLPILTSCCPGWVKFFEHQFPEMIDIPSTAKSPQQMFGAIAKSYFAKKLDKKREDLVVVSVMPCLAKKYECTREEFSVNGDADVNVSVTTRELAQLI…	[FeFe] Group A3	[FeFe] Group A3	Bifurcating	Labile	3	[FeFe]-centre, 3 x [4Fe4S] clusters, 1 x [2Fe2S] cluster	NADH dehydrogenase, thioredoxin	0.197262	0	1.18357	0	0	0	0	0	0	0	0	0	0	0
WP_017416084.1	MQVMNFSSANCKNCYKCVRICNVKAIEVKNDQAQIIENRCVACGQCLVVCPQNARDVLSDIENVKIALKKKKKVIAQIAPAFRGFFQYSAKVITALYKLGFSTVEEVSIGAELVSLEYENIINNSKSTEFLTSCCPSVMMLIEKYYPELIPNVIPVVSPMIAHAMSIRERYEDPYIVFIGPCISKKCEALSEENTGVVDAVLTFDEIVKWLKIEGIDYNSCEDGSMDFTGTTRGDCYPVVGGILRAISPTLKAKNLDSIRVHGIENCKNLLEEVKRGNLNKVCVELSACNESCLGGPGGSTSNESVYTRIQRIQRQVKKLNNEKYLDISKISIPLSRTFKNKMMDLHIPKEEEINQILNKMGKYDKEDELNCGACGYNTCYEKAIAVSQGMSQIEMCVP…	[FeFe] Group C	[FeFe] Group C3	Sensory	Labile	2	[FeFe]-centre, 2 x [4Fe4S] clusters, PAS domain	Phosphatase	0.134815	0	0	0	0	0	0.808891	0	0	0	0	0	0	0
WP_017416926.1	MNGQFMLIDNMPVEINGEKNVLELVRKAGIDLPTFCYYSELSVYGACRMCMVENKWGEIEAACSTPPKAGMEVYTNTPRLRKYRKMILELLLSHHCRDCTTCEKNGYCKLQDLAQRFGIKEIRFNNTSEEPALDKSSVSIVRDKSKCILCGDCVRMCDEVQNVGAIDFVGRGSEMTVSTAYDEPLAESNCVGCGQCAAVCPTGALVIKNDTSKLWKELSDKDTKVVVQIAPAVRVGISKELGCKDGENVMGKIVGALRKMGFNAVFDTSTGADLTVLEETGEFLARLEKNEKLPLFTSCCPAWVSYAENTHPDLLTNISTCRSPMQMFSSVLKEHYKHSSKKVVVVAIMPCTAKKFEAQRDEFKEDGIPYVDYVITTQELIQMIKESGIVFSEVEPEAV…	[FeFe] Group A3	[FeFe] Group A3	Bifurcating	Labile	3	[FeFe]-centre, 3 x [4Fe4S] clusters, 1 x [2Fe2S] cluster	NADH dehydrogenase, thioredoxin	0.171781	0	0	0	1.03069	0	0	0	0	0	0	0	0	0
WP_017890116.1	MSVISTIRTSCRDCYKCIRHCPVKAIRISLGHAEVVDERCIKDGRCVLVCPQGAKKVRSDLEEAKKLIASGGTVIASVAPSFVAAFPEATPGQVIRGLRMLGFSEVRETAEGAEWVAREHALLLQEGRENLITSSCPAVNFLITRYFPEHIEYLAPVVSPMVAHGRLLKREFPGASIVFIGPCIAKKAEAEEEEVRGDVDVVLTFSELREWFKEAHLELTALPEDRFSPGKVRFARAFPVEGGLIKSAALQGELLCRDILTITGVDRCKEFLKSFSPERSRFRIIEMMSCEGGCIDGPVLSSPLSPYERRERVLEYTEKFLKECEEPIVCLDPPSFRRTFSPSPVPRPEVPEEEIRRILALTGKFTPQDELNCGACGYNTCREKAEAVYQGMAEAEMCI…	[FeFe] Group C	[FeFe] Group C3	Sensory	Labile	2	[FeFe]-centre, 2 x [4Fe4S] clusters, PAS domain	Phosphatase	0	0.12325	0	0	0	0	0	0	0.739501	0	0	0	0	0
WP_018247867.1	MSDIHSVLLKADKCKGCTNCVKNCPTNAIRVHQGQAKIKDEYCIDCGECIRSCEYHAKYASTDRIEEIGDYKYPIALVPPSFYGQFTQNINPTKVILALQELGFYQVWDVALGAEVITAVTKEYLKDNNMPIISSSCPAVVRLVQLLYPELLNYLAPFKSPVEVTAQKAREFIKENEKVKDEEIGIFFITPCPAKMTTVDNPLAMEKSYLDKAIAVDEIYHELIKRVEDIDGYKEIENYNIPYFGISWASNGGEANLLTDINTVSVSGIHNVMSVLEELDRGDLSHIRYFEMVACQPGCVGGVLNIKNPFLAEFNIQNLIKEGVEFVKQDITDYDIKLPMNFKEKSIGSLDDDLIAAMAKLTKLEEEIELLPGLDCAACGAPDCRTLAEDIVNGWANRT…	[FeFe] Group C	[FeFe] Group C1	Sensory	Labile	2	[FeFe]-centre, 2 x [4Fe4S] clusters, PAS domain	Histidine kinase	0.27257	0	0	0	0	0.826529	0.808891	0	0	0	0	0	0	0
WP_018338302.1	MLYDNFAMLTKRELLIRIVKLLKEKDLVNGVKYIPVEMRPRNKKPIKCCVHKDRYILKHKIISILGFEITDEEIDLIPLAEFAQKALDNKNTKENILSVVHEACSACMQSQYFVTNMCRGCEGRPCLMNCPKAAISFKGGKASITQEDCVSCGLCSKVCPYHAIVYTPVPCEEVCPVKAITKGEDGTEHIDKDKCIYCGKCMQTCPYGAIMERSKVIDVYKSISDPNKKIIAIPAPAIYGQFNATPGQILSAIKAIGFDEVVEVALGAEDTSRNEAAEFLERMHEGKPFMTTSCCPAYVGWVDKHAPMVKPFVSDTRSPMVYAARRVKEQYPDAEVVFIGPCLAKRYEAEMYVPEVDYVMSFEELGAFMVAYDINVETCEEMPLNPEVTKFSRGYAQAG…	[FeFe] Group B	[FeFe] Group B	Evolving	Labile	1	[FeFe]-centre, 3 x [4Fe4S] clusters, 1 x [2Fe2S] cluster	None	0	0.204329	0	0	0	0	0	0	0	0	0	0	1.22598	0
WP_018338305.1	MQLRPIYTEPDNCQDCYKCIRECPVKAIRMEDNKASIIEDRCIYCGHCTQVCPTGAKKIRDGLTRAKLTLTQNPKVLLSLAPSYVSEFEGIHSSVLIAAIKKLGFTDVSETALGAEIVSDRTEKFLEEADNGVYISSACPVVVEYIRKYSPEHVHNITPIISPMLAHAKILKQLYGEDIKIVFAGPCICKKLEADTFNNLVDVVITFKDLKKWFEQAEINLHQIAPGQPDAHFIPYRSGMGAYYPIEGGMLKGLHEPKKQVHNMAFSELSTVKDVLKSLDTRRENDSIFLELLACKGGCINGPAKLSHISPALKRYEIIHQSELGNPKDDFKYIDLQILFCKDPHIQDHVYTEEEIKQAMAVVGKTGPEDELNCSGCGYDTCRDFAIAMLEGRAEENMC…	[FeFe] Group C	[FeFe] Group C3	Sensory	Labile	3	[FeFe]-centre, 2 x [4Fe4S] clusters, PAS domain	Phosphatase, thioredoxin	0.197262	0.645421	1.18357	0	0	0	0	0	1.479	0	0	1.46124	0	0.932283
WP_018592006.1	MSLVNLTINGKAVSVPSDTKILEAAKQVNVKIPSLCHLHMDDIKFDNHCASCRVCMVSAGRGLVPACGTLVREGMVVNTNSPEALKYRKNVVELMLSDHPKDCLSCIKSGNCELQDIAADLGIRNVRFSDGHQSYVPVDTSTKSIVKDHAKCILCRRCETMCNEVQTVGVLSGINRGFGTEVSTFYGVDLVDTNCTFCGQCISVCPTGALIEKDNTAEAWAALGQKEKPVMVQTAPAVRVGLGEEFGLDPGSISTGKMVAALKALGFDYVFDTNFAADLTIMEEANEFVNRFVKGEKLPILTSCCPAWVNFMEHEYPDLLGYLSTCKSPQSMFSPIARHYFAEKALDKKPDEVIVMSIMPCVAKKYEVSREELGQDGYLDTDLSLTTRELARMIKEAGI…	[FeFe] Group A3	[FeFe] Group A3	Bifurcating	Labile	3	[FeFe]-centre, 3 x [4Fe4S] clusters, 1 x [2Fe2S] cluster	NADH dehydrogenase, thioredoxin	0.383339	0.636986	1.18357	1.11646	0	0	0	0	0.739501	0.995132	2.08728	0	0	0
WP_018592801.1	MWFDKFSKKNCKNCYACVRVCPVNAIEIKNEQARIREERCIVCDACYLACPQKNRLSTSEVPIVKHYIKNKETVIASIAPSFAAIFGDNSHKIPGVLKYLGFSYVEETLVAAQPIIDEYFKYINKDDNKNYITTLCPSIINLVEKHYPDLIENLIPVISAFACHGRIIKKKYGANVKVVFIGPCLGKKDESRFENSVDAVITLEELRRWIKQENISFEDFKESSFDAISHYNRVFPFVSENTDYFFDSSKNKEVVSVDGPNDCKKTIEAMLNKRVSNVIFDMNFCESGCLRGSGIADDGASSYERRKNIETYSKKCEKLYKDKIDNSYDEILSKIDLHRKFQSKFSPLKEPSETELREILKSMGKFARMDEINCKACGYKTCRDKAKAVFNGYADTSMC…	[FeFe] Group C	[FeFe] Group C3	Sensory	Labile	2	[FeFe]-centre, 2 x [4Fe4S] clusters, PAS domain	Phosphatase	0.323832	0	0	1.11646	0	0.826529	0	0	0	0	0	0	0	0
WP_018660435.1	MEMVKLTIDGIEVEVPRGTTVIEAARQIGINIPSLCYLKGVSHTSSCRVCVVEVGPRLIASCTLPCENGMEVKTNTPKVREARRTVVELLLSNHKRECTSCNRSENCELQTLAKELNIRDLRFEGERISYEIDNSSPSLVRDQEKCVLCGRCINTCKNVQTVGAIDFSRRGFNTRVSTALDKNIADTVCVNCGQCIMACPVGALTEKENIKEVWKALADPEKFVVVQTAPAVRVALGEEFGMPIGTRVTGKMAAALRRLGFDKVFDTDFAADLTIMEEGTELLTRLEKGERLPLMTSCCPGWVKFVEHFYPELIDNLSTCKSPHEMEGALIKHYLAEKLGVDKKNVVVVSIMPCVAKKFEGQREELSNENLQDVDYVLTTRELAQMIKEAGIDFTKLPD…	[FeFe] Group A3	[FeFe] Group A3	Bifurcating	Labile	4	[FeFe]-centre, 3 x [4Fe4S] clusters, 1 x [2Fe2S] cluster	NADH dehydrogenase, thioredoxin, thioredoxin	0.413265	0	0	0	0	2.47959	0	0	0	0	0	0	0	0
WP_018662721.1	MINVTINDIKLQVPEGTTILDAAKMVNINIPTLCHLNLHDIKMVNRTASCRVCLVEVEGRRNLAPACATECFDGMIIRTNTKRAIRARRTMVELLLSDHPTDCLVCEKNGNCDLQRIAAELGIRKIRFEGEQSTYQKDSSSGALYRNPDKCIMCRRCETMCNEVQTCSVYSAIDRGFETVVGPAFNLPMLDTQCTFCGQCVSVCPTAALTEVSYVQDVWNALHDPDKYVIAQTAPAIRVALGEEFGLKPGTIVTGKMVAALRRLGFKKVFDTDFAADVTIMEEAKEFIDRLNGKGRLPILTSCCPSWVKFIEHQFPELLDIPSTCKSPHMMFGAIAKTYFAEKFNIPADKIVVVSVMPCIAKKYEIQREELKSDGVQNVDYVITTREFAKMIREAGIDF…	[FeFe] Group A3	[FeFe] Group A3	Bifurcating	Labile	3	[FeFe]-centre, 3 x [4Fe4S] clusters, 1 x [2Fe2S] cluster	NADH dehydrogenase, thioredoxin	0.309536	0	0	0	1.03069	0.826529	0	0	0	0	0	0	0	0
WP_018962522.1	MYYHSVTLDEEKCRGCTNCIKRCPAEAIRVRGGKARIIDELCIDCGECIRACPNHAKIAITDSWDLMDRFQYRIALPAPSLYGQFKNPDINRILTALLQIGFDDVFEVALGADIISHLTREEINRGDLKKPVISSSCPAVVRLVEIRFPSLLGNVLDLCTPMEASAMLAKDAAQKKTGLKREDIGVFFISPCGAKVTSVRRPIGVENSEVDGVFSLTSVYEKIASKVNHIEHPLPLSKASMVGVAWARSGGEAAGTMLENSIYVDGIQNVIKVLEEIELGKMEDLDFLEAMACVGGCVGGPLTVENNFVAQQRIKRLSERMQRESFVDKMTEQELVDEDKPDLERLRWSRSLERSNAMELSDDIGKALSMMQQIDEVLKTLPGLDCGSCGAPTCKTLAE…	[FeFe] Group C	[FeFe] Group C1	Sensory	Labile	2	[FeFe]-centre, 2 x [4Fe4S] clusters, PAS domain	Histidine kinase	0.572492	0.339796	1.18357	0	0	0.826529	0	1.42485	0	0.995132	1.04364	0	0	0
WP_019225928.1	MVNLRINNKSVSALEGATILEAAKQNNIHIPNLCYLEGVHKFGSCRLCVVEVEGAKSLQPSCMVTVREGMVVKTNTEKVRKARKVLYELILSDHPKDCLNCERNQSCELQEMGNMLGVSEARFEGKRSAGCIDKSPSITRDMSKCILCRRCITVCNEIQQVGILNAQNRGFKTVVGPAMDLPINSVNCAYCGQCTVVCPVGALKETDAIQDVWQAINDPNKRVVVQVAPAIRAAIGEEFGLEPGTLVTGKLASALRELGFDDVFDTNFTADLTIMEEGTEFLTRVKNVLTGGQAALPMITSCSPGWIKYVEHAYPEELDHLSTCKSPHTMLGALAKSYYADKIEVDPKDMYVVSIMPCTAKKFEISRPEMQNNGVPNVDAVLTTRELAKMIKEAGIDFV…	[FeFe] Group A3	[FeFe] Group A3	Bifurcating	Labile	3	[FeFe]-centre, 3 x [4Fe4S] clusters, 1 x [2Fe2S] cluster	NADH dehydrogenase, thioredoxin	0.137755	0.15538	0	0	0	0.826529	0	0	0	0	0	0	0	0.932283
WP_019552746.1	MAKINVKINGVLIEVESGTRIIEAAKSLNIEIPHLCYHPDQRIKALCRICSVEVVGSKKMSAACSTYVWDGMEILTNTKKVYDTQKGILEMILANHKQDCLSCSRNGNCELQNLCMRFGIQRQTLDKTVNPVYLDDNPCIERNMDKCVKCGRCDKICRDVQGVSAITWAGRSETFTFTTAYNKSLMDTDCVLCGQCTTVCPVGAIVEKDNTQTVREAIQDSGKHVIVQVAPAVRVALGDIFELEKGTVVTGKMVTALKQLGFDKVFDTVFAADVTIMEEGNELLDRIRNNGILPMITSCSPGWVNYMEKHYSDQIDHLSTAKSPQQIFGAIAKSYYADKSNMNKKNIITVSVMPCVTKKFEAARPEMANDGVRDVDIVITTRELAKMIQYAGIDFVALE…	[FeFe] Group A3	[FeFe] Group A3	Bifurcating	Labile	3	[FeFe]-centre, 3 x [4Fe4S] clusters, 1 x [2Fe2S] cluster	NADH dehydrogenase, thioredoxin	0.723385	0	1.18357	0	0	0.826529	1.61778	0.712424	0	0	0	0	0	0
WP_019879374.1	MNSKVNITIDGKIVSVSKDKSLLKACQQAGVNVPSLCYHPELRTEGSCRVCMVEVEGQRTLVPSCVFPVTEGMQVRTNTQRVLKARKTVVELLLANHPQDCLTCQRNGNCELQKIAADLNLRKIRFEGEKKSYPLDNNNPSLVRDMEKCILCGRCVRMCAEKQGMHIYGFINRGFDTTVAPPFSLGLDKVDCTYCGQCATVCPTAAIVEKDDTEAVLKVLNDPTKHVVVQTAPATRVALGEDLGLERGAIVTGKMVAALKHLGFDKVFDTNFSADLTIMEEGAEFIHRLNNGGLLPMFTSCSPAWVNCVELQYPDLMGHLSTAKSPQQMFGAMVKSYYAEVAGIDPKNIVSVSIMPCTAKKAEAKRPEMSADGYQDVDFVLTTRELARMIKESAIDFNS…	[FeFe] Group A3	[FeFe] Group A3	Bifurcating	Labile	3	[FeFe]-centre, 3 x [4Fe4S] clusters, 1 x [2Fe2S] cluster	NADH dehydrogenase, thioredoxin	0	0.408659	0	0	0	0	0	0	0	0	0	0	2.45195	0
WP_020073353.1	METGVSLAQIMRPGRRSIIMTTFEELYNRLVKASVQNHLEEELEQAKQDGFDPHHLDCLLNPSKYAPVIRIGDCDCTDKEDTSCAGKCLFDALYRDENGNISINKELCVGCSECVNNCQAKKLTESRDILPALSAIQNAKTPVYAMVAPAFINQFSSDVTPGKLRSAFKKIGFDGMVEVALFADILTLKEALEFDKNIVKEEDYQLTSCCCPMWISMIRKVYKQLIPHVPGAVSPMVACGRSIKTLYPGAITIFIGPCLAKKAEAKEADVSDSTDFVLTFQEIKDVFDFAGIDLASMPEDERDHSSRAGRIYAGTGGVSEAVQSTVTRLNPDRQISVRAAHADGVRACKEMLSSALEGKLTANFIEGMGCVGGCVGGPKALIPKEEGRKNVFEYGDTAT…	[FeFe] Group B	[FeFe] Group B	Evolving	Labile	1	[FeFe]-centre, 2 x [4Fe4S] clusters	None	0	0.17394	0	0	0	0	0	0	0	0	1.04364	0	0	0
WP_020490880.1	MVNFKINNKSVSVPEGATILEAAKQNNIHIPNLCYLEGVHKFGSCRLCVVEVEGAKSLQPSCMVTVREGMVVKTNTEKVRKARKVLYELILSDHPKDCLNCERNQSCELQEMGNMLGVGEARFEGKRSAGCIDKSPSITRDMSKCILCRRCITVCNEIQQVGILNAQNRGFKTVVGPAMDLPINSVNCAYCGQCTVVCPVGALKETDAIQDVWQAINDSNKRVVVQVAPAIRAAIGEEFGLEPGTRVTGKLASALRELGFDDVFDTNFTADLTIMEEGTEFLTRVKNALTGGQATLPMITSCSPGWIKYVEHAYPEELDHLSTCKSPHTMLGALVKSYYADKIKVDPKDMYVVSIMPCTAKKFEISRPEMQNNGVPNVDAVLTTRELAKMIKEAGIDFV…	[FeFe] Group A3	[FeFe] Group A3	Bifurcating	Labile	3	[FeFe]-centre, 3 x [4Fe4S] clusters, 1 x [2Fe2S] cluster	NADH dehydrogenase, thioredoxin	0	0.289106	0	0	0	0	0	0	0.739501	0.995132	0	0	0	0
WP_020814848.1	MGTMIIDGQLVEYTDEKNILAVIRKAGIELPTFCYHSELSVYGACRMCMVEDKWGSTITSCSTPPKDGMEVWTNTDKLKKHRKMILELLLANHDRDCTTCEKSGRCKLQEIALKVGVKKVRFGQEKKEMPIDDLGPSIIRNPNKCILCGDCVRACQEIQGVGVLDFAYRGSNLQVTTAFNKSLQEVDCVNCGQCRVVCPTGALMIKKDIDRAYEALQNKNKRVIAQIAPAVRVAIGEDFGLQPGEISMGKIVAALRKLGFDQVFDTAVGADLTVIEEAEELMDRIQRKEKLPLFSSCCPAWFKYAEQKHPELMENVSSCLSPQQMFGAVIKEQFKKEHSTDERENIVIAIMPCTAKKYEASRPENTINGERQVDMVITTQELAIMIQENGIVFNELEDE…	[FeFe] Group A3	[FeFe] Group A3	Bifurcating	Labile	3	[FeFe]-centre, 3 x [4Fe4S] clusters, 1 x [2Fe2S] cluster	NADH dehydrogenase, thioredoxin	0.27257	0	0	0	0	0.826529	0.808891	0	0	0	0	0	0	0
WP_020815721.1	MDMINLKIDGFDVSVPKNTTILEAAKQLNIDIPTLCFMKGVNEPGSCRVCVVEVAGWRGLHPACVTKVSEGIVVKTATSTVREARKNILELIMANHNRECLSCPRNLKCELQTLCNDNGIDAIPYEGKVDKGCLDTSGPIVRDPNKCVLCGRCVSVCSKIQDVSAIDFAFRGAHMTVTTAYEEGLANQECINCGQCIKICPVGALQERDDTEKVWKALENPELHVVVQTAPAVRVALGEEFGFAPGTNVEGEMVTALRRLGFNKVFDTNFSADLTIIEEGNELIDRIKNGGKLPLITSCSPGWIKYCEHNYHDFIENLSSCKSPQQMFGAIAKSYYPIKTDVDPKSVFVVSVMPCTAKKYEADREEMNVDGLKDIDAVITTRELAKMIRQAGIKFAELE…	[FeFe] Group A3	[FeFe] Group A3	Bifurcating	Labile	4	[FeFe]-centre, 3 x [4Fe4S] clusters, 1 x [2Fe2S] cluster	NADH dehydrogenase, thioredoxin, thioredoxin	0	0.35971	0	0	0	0	0	0	0	0	0	0	1.22598	0.932283
WP_020845056.1	MIEESLNMSEEKLGQHYLAALHQAFPGVVVDEAWQTKDQLTITVKVNYLPEVVEFLYYKQGGWLSVLFGNDERQLCGHYAVYYVMSMEQGQKCWVTVRVEVDANTLEFPSVTPRVPAAVWGEREVRDMYGLRPVGLPDERRLVLPDDWPDELYPLRKDSMDYRQRPAPTTDAETYEFINELGDKKNNVVPIGPLHVTSDEPGHFRLFVDGENIIDADYRLFYVHRGMEKLAETRMGYNEVTFLSDRVCGICGFAHSTAYTTSVENAMGIQVPERAQMIRAILLEVERLHSHLLNLGLACHFTGFDSGFMQFFRVRETSMKMAEILTGARKTYGLNLIGGIRRDLLKEDMIQTRQLAQQMRRDVQELVDMLLSTPNMEQRTVGIGRLDPEIARDFSNVGP…	[NiFe] Group 4a	[NiFe] Group 4a	Evolving	Sensitive	6 or 9	[NiFe]-centre, 1 x [4Fe4S] clusters	NuoL, NuoH, two [FeS] proteins, (three antiporter subunits)	0	0.652936	0	0	0	0	0	0	0	0.995132	0	2.92248	0	0
WP_020883834.1	MSEEKKGQQYLAALHQAFPGVVLEESWQTKDQITVTVKVNYLPEVVEFLYYQQGGWLSVLFGNDERQLCGNYAVYYVMSMEQGEKCWLTVRVEVDPNKPEYPSVTPRVPAAVWGEREVRDMYGLVPVGLPDERRLVLPDDWPDELYPLRKDSMDYRQRPAPTTDSETYAFINELGSKKNNVVPIGPLHVTSDEPGHFRLFVDGENIIDADYRLFYVHRGMEKLAETRMGYNEVTFLSDRVCGICGFAHSTAYTTSVENGMGIVVPERAQMIRAILLEVERLHSHLLNLGLACHFVGFDSGFMQFFRVREASMKMAEILTGARKTYGLNLIGGIRRDLLKDDMIQTRQLAQQMRRDVQELVDMLLSTPNIEQRTVGIGRLDPQIARDFSNVGPMVRASGH…	[NiFe] Group 4a	[NiFe] Group 4a	Evolving	Sensitive	6 or 9	[NiFe]-centre, 1 x [4Fe4S] clusters	NuoL, NuoH, two [FeS] proteins, (three antiporter subunits)	0	0.24354	0	0	0	0	0	0	0	0	0	1.46124	0	0
WP_021167212.1	MEMVNLTIDGQQVAVPKTSTVLEAALSIGIKIPTLCYHPELRVEGACRVCMVEVEGARSLVASCVYPVNEGMVVHTNSAAAREARKSVVELLLANHPTDCLSCQRNLNCELQNIAADVGVREIRFDGEKKSYPLDNQNPSLVRDQNKCILCGRCIRACSERQGVHVYSFANRGFNTTVVPAFSLGLDQVACTFCGQCAIVCPTGAIVEKDDTEAVWAALSDPKKHVIVQTAPAVRVALGEALDLPNGSIVTGKMVAALKRLGFDKVFDTNFSADLTIWEEGSELIDRLTNGGTLPMITSCSPGWVNFIELKYPDLLDHLSTAKSPQQMFGAIAKTYYAEKAGIDPKDIVSVSIMPCTAKKAEAARPEMNSSGYQDVDYVLTTRELGRMVRAAGINFAKL…	[FeFe] Group A3	[FeFe] Group A3	Bifurcating	Labile	3	[FeFe]-centre, 3 x [4Fe4S] clusters, 1 x [2Fe2S] cluster	NADH dehydrogenase, thioredoxin	0	0.204329	0	0	0	0	0	0	0	0	0	0	1.22598	0
WP_021169841.1	MMGHHASDPNKIVNVTIDGIPVSCPETTLILDAAKMAGVKIPVLCYHPDLKVRATCRICVVEVKGQRKLKTACSNEVWDGAEFITNNPAVRQARKDVLELILAEHPQDCLKCVRNTSCELQQLARDFGISKPLFKNEPKQLPIEDSNGVIVRDMAKCVKCGRCVEMCQEVQTVGAINTAHRSVEYEITTAFDRPLQDSTCVYCGQCISVCPVGALYEKDETEKVWQAIDDKEKHVVVQVAPAVRVALGEEFGLEPGSITTGKMVAALRRLGFDKVFDTDFAADVTIMEEGSELLERMTNGGTLPLITSCSPGWINFVETFYPDLLPHVSTCKSPQQMFGALAKSYYPEKAGIDAAKIVSVSIMPCTAKKYESARPEMNGSGYRDVDVALTTRELARMIK…	[FeFe] Group A3	[FeFe] Group A3	Bifurcating	Labile	3	[FeFe]-centre, 3 x [4Fe4S] clusters, 1 x [2Fe2S] cluster	NADH dehydrogenase, thioredoxin	0	0.339796	0	0	0	0	0	0	0	0.995132	1.04364	0	0	0
WP_021433568.1	MGDNKSTIIQSSLGSVFTVFSEEELKQITDSSRKIAISGKINNPGIIEVPESATLKDIIDLAGGIIKNRDFKAAQLGIPFGGFLTEDSLDKELDFTLFNSECSRTIIILSQEDCIVQYAKFYIDFLMGKMKDDKFKKYAKVKNEIMEMWKILDRISKGRSNMRDIFILRELANEVKNTLNQKHNIMQEIIDKFYGEIEEHIEDEKCYTAQCNNLVKLTITGKCIGCGACKRACPVDCIVGERKEQHYIDYNRCTHCGQCIASCPVDAITAGDNTLKFLRDLATPNKIVITQMAPAIRVAIGEAFGFEPGTNVEKKIAAALRKLGVDYVFDTTWAADLTIMEEAAELQERLEKHFAGDEDVKLPILTSCCPAWVKFIEQNYGDMLDVPSSAKSPMQMFAT…	[FeFe] Group A1	[FeFe] Group A1	Evolving	Labile	1	[FeFe]-centre, 2 x [4Fe4S] clusters	None	0.442569	0.24354	0	1.11646	0	0.826529	0	0.712424	0	0	0	1.46124	0	0
WP_021625383.1	MVTVTIDGREIRVPERTTILDAAHEAGIEIPTLCYLKDVNEIGACRVCVVEVEGIDQLVASCNNCALDGMVVHTDTPKVRQARKVNTELLLSQHDSECTSCVRSGNCSLQSFANDLGLVGLPYEKHLPDIEWDQNFPLIRNNDKCINCLRCIQICDRVQDCHVWDLANRAAHTSVNVIGGLPIDSVACALCGQCITHCPTGALRERDDTDRVWEALEDPDITTIVQIAPSVRTAWGDHWGMSNKEATVERLVACLRPMGFDYIINTDFSADLTIMEEGTELLERLKEGPHDHPMFTSCCPGWVRYVKSHYPELVDDVSTSKSPQQMFGAIIKSYYAEKLGVDPHKIFSISIMPCVAKKSECALPTMNDACGDPDVDVVLTVREVDRMIRSEHIDPRRLE…	[FeFe] Group A2	[FeFe] Group A2	Evolving	Labile	2	[FeFe]-centre, 3 x [4Fe4S] clusters, 1 x [2Fe2S] cluster	NADH-dependent glutamate synthase	0.197262	0.165855	1.18357	0	0	0	0	0	0	0.995132	0	0	0	0
WP_021646890.1	MEEKQITLQIDGHFITVAEGSTILEAACKIGIDIPTLCHIDLKGTCIKNNPASCRVCVVEVAGRRNLAPACSTPCTEGMVVKTSTLRVMNARKIIAELILSDHPNDCLTCPKCGDCELQTLALRFNIREMPFNGGELSPRKREVTSSIVRNMDKCIFCRRCESVCNEVQTVGALGAIRRGFNTTIAPAFDKMMTESECTYCGQCVAVCPVGALTERDHTNRLIEDLADPDKIVIVQTAPAVRAALGEEFGLKPGTLVTGKMVYALRELGFDYVFDTDFAADLTIMEEGSEILNRLTRHLNGDKSVRLPILTSCCPAWVNFFEHHFPDMLDIPSTARSPQQMFGSVAKSYWAEKMAIPREKLTVVSIMPCLAKKYECDRHEFKTEGHPDVDYSISTRELA…	[FeFe] Group A1	[FeFe] Group A1	Evolving	Labile	2	[FeFe]-centre, 2 x [4Fe4S] clusters	Small subunit	0	0.24354	0	0	0	0	0	0	0	0	0	1.46124	0	0
WP_021739962.1	MNKFFHSVYLDSDKCTGCITCLKRCPTQAIRVRDGKAHIINEFCIDCGECIRHCPHHAKHTKRDFIPVLKDYKYTVALPAPSLYSQFNNVKDTNIILTALVLAGFDDVFEVSAGAEIISELSRKYISEHPELYPLISTACPTVERLIRVRFPGLIPHLLPILPPMEAAAIIARKRAAAKTGLDPSDIGIIFLSPCPSKITFIYDPLGMRESNVDAVLAIKDIYPLLLSHMKEAQKQLENKVSYTLSGRIGKGWAISGGEAYGIISDHYLAADGIENVIRVLEDLEDEKILPGLQFVELNACSAGCVGGVLTVENPYIAKAKVKQSSKYEPVLRMHCADFQEEPPEIFGWTEPVAYEPVYTLGANIFESMEKILESQEILKELPGLDCGSCGSPTCKALA…	[FeFe] Group C	[FeFe] Group C1	Sensory	Labile	2	[FeFe]-centre, 2 x [4Fe4S] clusters, PAS domain	Histidine kinase	0.304814	1.29424	0	1.11646	0	0	0	0.712424	2.2185	0.995132	0	1.46124	1.22598	1.86457
WP_021800342.1	MFQFETQLNKLKHEVLKNVAILAKENRLNQEELEKIPYEIITDETPRYRCCVYKERAIVAERAKLAAGYLADGDKINCELIDIRPNEQIIYVIEAACDRCPINRYTVTDQCRNCLAHRCLESCAVNSISMVGGRAYINQETCKECGRCKSACPYNAISEVMRPCKVSCPTGALAVNTEDRRAMIKEEDCINCGACVSACPFGAISDKSLIAPVAKRLAKGRKMYAVVAPAISGQFGMKVSYGQIKNAIKKLGFEDMVEAACGADAVTVHESNEFVERMENGDKYMTNSCCPGFLSYIEKKFPDQVERISGTVSPMVATGRYIKEKDPEAKVVFIGPCTAKKSEAVRESVADAVDYVLTFEELFALLEAFDVDPANCEAEVVEDASIFGRGFGIHGGLTS…	[FeFe] Group B	[FeFe] Group B	Evolving	Labile	1	[FeFe]-centre, 3 x [4Fe4S] clusters, 1 x [2Fe2S] cluster	None	0	0.15538	0	0	0	0	0	0	0	0	0	0	0	0.932283
WP_022196619.1	MVKLKIDNYDVEVPAGTSILDAARTVQIEIPTLCKHPDVDPSAGCGMCIVRVNGRVMRSCCTPVGEGMEVITSDPELVDVRKTVLKLILSNHPNECLTCIRSGHCELQDMANTFGIRDSKLPSLNKKYDIDDSTKAIVLDASKCIVCGRCVEVCQNQQNVWALSYLNRGLATRITAAGGINLADSPCIKCGQCSAHCPTGAIVEYDETEKVWNMLNDKDLYTIVQIAPAVRVAIGEEFGYDFGENLTGKTYAALRRMGFKKVFDTNFGADLTIIEEASEFVERFTKRPESLPMFTSCCPAWVDLLEKYHHDMIPHFSTCKSPQSMVGAMAKTYYAEKMGIDPAKIRVVSVMPCTAKKWEIVRSEDMRSSGFQDVDVSITTRELARMIKQAGIDFRKLHD…	[FeFe] Group A3	[FeFe] Group A3	Bifurcating	Labile	3	[FeFe]-centre, 3 x [4Fe4S] clusters, 1 x [2Fe2S] cluster	NADH dehydrogenase, thioredoxin	0	0.289106	0	0	0	0	0	0	0.739501	0.995132	0	0	0	0
WP_022349260.1	MVEITIDGNVYEAEEGATILEVAREHRVDIPTLCYLREINEIGACRVCLVEVEGIDHLVAACNNEVTDGMVVYTDTPRVRRARVANLQLILSRHDRRCPTCFRNGTCQLQALTDRMGVHEVPYTTFFETKPIDARFPLVREPEKCVNCLRCVSTCQKVQALGVWDLVDSGSRAHVDAVAPDDCAFCGQCIANCPTGALHERDDTERVFDAIFDPDTITIAQVAPAVRSSWAELLDLGGKPPTPGRMVAAIRRLGFDYVFDTDFAADVTIMEEASELIEHLKEGAEGPMFTSCCPGWVRFAKTRYPELAKKLSTTKSPQQIFGALAKTYYAEILGVDPAKIFVVSYMPCVAKKMEAAYPGMDSTGTGPDVDAVLSVRELTRQLRQRFVNVDLLEEEDFDR…	[FeFe] Group A2	[FeFe] Group A2	Evolving	Labile	2	[FeFe]-centre, 3 x [4Fe4S] clusters, 1 x [2Fe2S] cluster	NADH-dependent glutamate synthase	0.118737	0.24354	0	0	0	0	0	0.712424	0	0	0	1.46124	0	0
WP_022363293.1	MTRSQLNIDHVARVEGHGNVHVVIEDDVVKTVEMNIVEPARLFESMVRGQSYKDCSYISSRICGICSPSHCVTDLKAVEDAFGIEVSSRTKMLRELLVYGSYLQNHASHLFVFVVPDFVGEESVFPLAQSDPELFNQALDLKKLGNDLCTLVGGRSIHPITAVVGGFTHEISAQEYLELADRLEAAIPFAKATVDLFSSFRITEIHTASDLLAMVEDDYYPVQSSNTLELIDEHVRFDAHDFESYLEEYEVPHSGALFTRVKATGKPVFTSALSRLNASWDHLSQEAKFASAKAGLRPEEKNPMKNNLAQAIEILDALIRCAGICRELAKGEGDSKPVPFEVRAGTGVGMSEAPRGVVFHKLEFDDEGRVLHASIITPTSQNLASLEADTRHLVEVLVE…	[NiFe] Group 3b	[NiFe] Group 3b	Bidirectional	Tolerant	4	[NiFe]-centre, 3 x [4Fe4S] clusters	Diaphorase, [FeS] protein	0.118737	0	0	0	0	0	0	0.712424	0	0	0	0	0	0
WP_022369673.1	MVNITINGVSLSVPENSTVLQAAKNAGIEIPTLCFLKEYNEIGACRICLVEIKGYDRLAPACNTTVEEGMVINTRSARVIEARRINLQLLMAQHDQNCLSCVRSENCKLQQLCNDENITTQPFEKDFEPFEWNTNWTLIRDASKCVKCMRCVSICDQVQANHAWTIKGTGKRTTVAPSFNTEGAPDMRCALCGQCITHCPTGALTARDDCDKVFDAIADESKTVVVQIAPSVRTAWGSAFGLTPEESDIDLLAAALKQAGVDYVFSTDFSADLTIMEEGSEFLELFTSGKTTEAPLFTSCCPGWVRYVNSHFPQTARHLSTAKSPQQMLGALIKSYFAEQQGIDPETIYSVSIMPCVAKKSECAREDFTDACGDPDVDVVLTTREVGRLLKRKNIDVAN…	[FeFe] Group A2	[FeFe] Group A2	Evolving	Labile	2	[FeFe]-centre, 3 x [4Fe4S] clusters, 1 x [2Fe2S] cluster	NADH-dependent glutamate synthase	0	0.204329	0	0	0	0	0	0	0	0	0	0	1.22598	0
WP_022378933.1	MFNVTVDGKAVSVKEGSTILDAAQAASVSIPTLCWMKDLNEIGSCRICVVETEGDDALSAACNTPVRDGMNINTRSPRVIAARRENMRTILEGHRSECTTCERSGTCALQRTAAELNVGELDFDPVFDFEAWDEDFPLQRDASKCIRCGRCVVECAKVQHCSVWDFKGPSAFRSITVRDGKEISEAGCALCGQCITHCPTGALTARNDIAKILDALADPDTMTVIQFAPAIRAAWGEVMGLTHEEATPGRMAAAAKSLGFDRVFDTDFAADLTIMEEGNEFIEWYTSGKKRPMFTSCCPGWVRFAKLHYPQFVEQLSTSKSPHQMLGAVVKNTLKEPMEAEGKKRMFVVSVMPCVAKKYECGVPQLSTKAGPDVDAVLTTREFNSMLRMFKVNCAELEE…	[FeFe] Group A2	[FeFe] Group A2	Evolving	Labile	2	[FeFe]-centre, 3 x [4Fe4S] clusters, 1 x [2Fe2S] cluster	NADH-dependent glutamate synthase	0.171781	0	0	0	1.03069	0	0	0	0	0	0	0	0	0
WP_022387742.1	MVTITIDGNVCEVPANTTILEAAASVGIKIPTLCYLKDLNEVGGCRVCVVEVEGAEHLVAACNNTVLDGMVVHTNTPKVRAARMTNVELLLSQHDSSCTSCVRSGNCTLQTVANDLGIYRLPYKKHVEHNSWDRTFPLIRDNEKCIRCLRCIQVCEKVQGLGVWDLTNRASHASVDVRGRKPITEVDCAACGQCITHCPVGALRERDDTERVFDAMADPNKVVMFQIAPAVRTSWGEELGLSREEATVERLCSLLHAMGASYVFDTDFSADLTIMEEGSELLHRIAEHDAGGEDVPALPLMTSCCPGWVRYVKARYPQFVSQVSTSKSPQQMFGAMAKTHYADVLGVEAKDVFCVSVMPCVAKKTEAALPTMVGESGDPDVDVALTVREVVRMIRASHM…	[FeFe] Group A2	[FeFe] Group A2	Evolving	Labile	2	[FeFe]-centre, 3 x [4Fe4S] clusters, 1 x [2Fe2S] cluster	NADH-dependent glutamate synthase	0.316	0	1.18357	0	0	0	0	0.712424	0	0	0	0	0	0
WP_022444415.1	MNAWINNRPVTFEEGETILQVAKRLGIFIPTLCALLPLDHTPGTCRMCITEIERKETPGKRELVTSCTTPMLEGMAVFTHTPEVRHRQRQQAAWIFSDHDQDCASCVRHGNCELQDVALYVGLQNNSCNGRFIAKRPVDTSAHGLLRDVNKCIRCGRCVEVCRKVQGISALTLDDIGTKRGVGIAGADRWIDSPGCVECGQCTLVCPTGALGEKDQCDTAIDWFDDPEIKTIVAFAPSARVTIGDEFGLEPGKNTEGQLITAIKMLGADFVCDVNWGADVTIMEEGNEFLNRLRTGGTLPMMTSCCPGWVTYVEKHHPEMMGNLSTTRSPQGIFGALAKTWFAKTHNIDPKKLRFISIMPCTAKKEEAARPQLARDGMPDTDLVITIREFARILRRYGI…	[FeFe] Group A2	[FeFe] Group A2	Evolving	Labile	2	[FeFe]-centre, 3 x [4Fe4S] clusters, 1 x [2Fe2S] cluster	NADH-dependent glutamate synthase	0.186077	0	0	1.11646	0	0	0	0	0	0	0	0	0	0
WP_022739022.1	MTTKKQSPLRVGETHVQAVRDTFPGAVLDATWQAADQVTITVPTDMLPDVVEFLYYGRGGWLPNMVANDERPLHGCYALYYLLSMEESDPGFVVVRAEVDPHSMEYPSVTPRVPACVWSEREAFDMFGLRAVGLPDERRLVLPDDWPCDLYPLRKDSMDYRKRPAPVTDVENYSFLYEGHAEETTEVPMGPLHITSDEPGHFRLFVEGEDIIDADYRLFYVHRGMEKVAESRLNYDAVTFLADRICGICGNAHSVAYAEAVEHAQGIEVPVRAQYIRSILLEVERLHSHLLNLGLVCHYCGFDTGFQHFFRVREKTMDLAVLLTGARKTYGLNLIGGVRRDILDEQKLATIKYVRELRHEVEALVDMLVSTANFESRTAGIGRLDPAVARDFSPVGPCV…	[NiFe] Group 4a	[NiFe] Group 4a	Evolving	Sensitive	6 or 9	[NiFe]-centre, 1 x [4Fe4S] clusters	NuoL, NuoH, two [FeS] proteins, (three antiporter subunits)	0.92037	0	0	0	0	2.47959	1.61778	1.42485	0	0	0	0	0	0
WP_022746733.1	MNSKYNDLFDELVKSYYEGNFDETLSSIMVCHEKSPQETFEIITSLCGVNIKFDNNYIYNIKKAITNYAVNKRIVKKLEDCSANCSKDGNEKFKCEAACPFNAISYDSKKKNTYIDSNLCVNCGLCVDSCPNGRILDKVEFIPVMNLIHDSKTVIAAVAPAIAGQFGDDVTLDMLRAAFIKLGFTDMIEVAFAADILSIKEAVEFDKHVNGPKDLMITSCCCPIWVGMLKKVYTELVPDLSPSVSPMIAAGRIIKKLNKDAKVVFVGPCIAKKAEAKEKDIAGAIDFVLTFQELDEIFKALNIEPNKMKGIPSIEYASRGGRLYARSGGVSIAISEVIEELYPEKFKHFKSAQVSDVKDCKEMLENALQGKIDANFIEGMGCPGGCVGGPKRIIPTDKG…	[FeFe] Group B	[FeFe] Group B	Evolving	Labile	1	[FeFe]-centre, 2 x [4Fe4S] clusters	None	0.134815	0	0	0	0	0	0.808891	0	0	0	0	0	0	0
WP_022847517.1	MAETVTIKIDGKKYTVESGQTILEICKKLGIYIPTLCFMEEISEGGHCGLCIVDVKGAKTFQRACITEVRDGMEIETNTPAVREVRKTVFEMILADHKVECPVCKRDETCEIRKVAKHLGFPDFEVEPIYRDEGVDNSIISREPAKCIKCQRCVNTCELIPGIGIYGYFGKGHDATVEPPESLSMSDTPCIVCGQCVVRCPTGALTERDDTEKVLEAIYDPDKVVFASFAPSVRVAIGEPFGMEPGEVVVGKLVSALRKLGFDRVYDVNFGADLTIVEEANELIERIKNGGVLPMATSCCPGWVSFVERFYPEFIPNLSSCKSPQAMLGALVKNYMKEVEGIPEENVVHVTIMPCTAKKYEASRPELSGDTDYVLTTRELARLLKRFDIDLSKLPEDEA…	[FeFe] Group A3	[FeFe] Group A3	Bifurcating	Labile	3	[FeFe]-centre, 3 x [4Fe4S] clusters, 1 x [2Fe2S] cluster	NADH dehydrogenase, thioredoxin	0	0.370185	0	0	0	0	0	0	0	0.995132	0	0	1.22598	0
WP_022851983.1	MGKRITVDPITRIEGHLRIDVEVDNGSVSKAWASGQMWRGIETMLKGRNPKDAWVFAQRFCGVCTTVHAISSIRSVEDALDVELPVNAQMIRNIMIALHSLQDHIVHFYHLSALDWVDITSALEADPAKAASIAQSLSPWPGNSVTEFAAVKERLKGFVSTGKLGIFSSGYWGHKDMRLEPEINLIAVAHYLKALDYQRKAAQAVAILGSKNPHIQNLVVGGVATAVNVDNPATLNVERLALLRSLTMEVKQFVNEVYYPDVLAIASFYKDWFKYGRGVDNYLATPDFPLDGKSTSFGVTGGTIMNGDLSTFRESASWNDDYIRKNITESVAHAWYEDGEPLHPWKGETEPSYGEFDDEGKYTWVKAPRLEGKPAQVGPLAQILVNYAAGDEKVTELVN…	[NiFe] Group 1c	[NiFe] Group 1c	Anaerobic Uptake	Sensitive	4	[NiFe]-centre, 2 x [4Fe4S] clusters, 1 x [3Fe4S] cluster	[FeS] protein, TM subunit	0.118737	1.39974	0	0	0	0	0	0.712424	0	0.995132	2.08728	4.38373	0	0.932283
WP_022854721.1	MKEVQLTIDGISVKVPEGTTILEAAKKVGIKIPTLCYLNGVGLNHIKHDVGACRVCVVEVQGKNDLLSSCNTLVEEGMVVYTHTPRVLSTRKLNLELMLSDHHLDCPTCPKNGICELQSLCAELNIRSIRPKGEMKTYEIDSSSPSIVRNPNKCIVCQRCITACKVLQTVDVLELYGNGFEAIVRPVGGKSLIETKCVACGQCALVCPTAAIVEKDDTSLVWEALSDPKKHVVVQTAPATHVTIGEAFGLPRGTDITGKMVTALKMLGFDAVFDTNWSADLTIMEEGYELIHRIKNNGVLPQFTSCSPGWIKFVEEFYPDLIPHLSTCKSPQQMFGAVAKTYYAEKKGINPEDIFVVSIMPCTAKKYEAARPEMVSAQKYWNNPNITRDVDVVLTSREL…	[FeFe] Group A1	[FeFe] Group A1	Evolving	Labile	3	[FeFe]-centre, 2 x [4Fe4S] clusters	Small subunit, cytochrome b	0.37229	0.17394	0	0	0	0	0.808891	1.42485	0	0	1.04364	0	0	0
WP_023162310.1	MSGQFMIIDNIPVEINGEKNILELIRKAGIDLPTFCYHSELSVYGACRMCMVEDKRGRMQAACSTPPQAGIEIYTNTPRLRKYRKNILELLLANHCRDCTTCEKNEHCKLQDLAKRFKIKKVRFKNTSINKKIDNSSVCIVRNRSKCILCGDCVRVCEEVQNVGAIDFVKRGSNMTVTTAFDEPIANSNCVGCGQCAAVCPTGAIVVKDDTAELWEALSDKNTKVVAQIAPAVRVGLNEELGEENGENEMGKIVAALRRMGFDEVFDTSTAADLTVLEETAEFTSRLEKNESLPLFTSCCSAWVNYVENTHPELMKYVSTCKSPMEMFASVLKEYYKNSDKKIVVVAVMPCTAKKYEAKREEFSKNGVPDVDYVITTQELISMIRQAGIVFPELEPEAV…	[FeFe] Group A3	[FeFe] Group A3	Bifurcating	Labile	3	[FeFe]-centre, 3 x [4Fe4S] clusters, 1 x [2Fe2S] cluster	NADH dehydrogenase, thioredoxin	0.304814	0.70759	0	1.11646	0	0	0	0.712424	0	0	2.08728	0	1.22598	0.932283
WP_023920491.1	MGYMTINNRRVAFTDEKNVLSVIRKSGIDLPTFCYHSELSTYGACRMCVVEDERGKVFASCSEVPRDGMVIYTNTPRLQHHRKMIIELLLSSHCRDCTTCAKNGVCTLQKLASQLGISEIRFENHKKPLPLDTSSDCVIRDPNKCILCGDCVRTCDEIQGLGILDFAFRGSKMQVMPAFNRELAETDCVGCGQCRAVCPTGAISIRQDVDPVWKALADKNIRVVAQIAPAVRVAIGDKFGIPKGENTLGRLVAALRHMGFDEVYDTNFGADLTVMEESAELLERLKSGKNLPLFTSCCPGWVKFCENRYPEFRENISTCRSPQAMFGALLKEEARMKEAEAEKEGRSLRKTVVISIMPCTAKKAEIKRPEHFTEGQQDVDYVLTTTEVTRMIKEAGIDL…	[FeFe] Group A3	[FeFe] Group A3	Bifurcating	Labile	3	[FeFe]-centre, 3 x [4Fe4S] clusters, 1 x [2Fe2S] cluster	NADH dehydrogenase, thioredoxin	0.526123	0	0	0	0	0.826529	1.61778	0.712424	0	0	0	0	0	0
WP_023973103.1	MSKYMVIDGNRIEFDKEKNILDLVRKAGIDLPTLCYYTDLSVYGACRMCVVEDERGSILTSCSTPPKDMMSIRTNTPKLQKYRKVILELLLATHCRDCTICEKNGKCKLQKLASRFGLTNIRFKSIEGKKDLDTSSKSIIRDPNKCILCGDCVRMCNEIQSVGAIDFANRGSNMVVSPAFGKSLAETDCVNCGQCATVCPTGAIVVKSDIKNVWKAIYNHKQRVVAQVAPAVRVALGEEFGIKPGENVMGKIVAAMRKLGFENIYDTSLSADLTVIEESKEFLKKLESDDNKFPLFTSCCPAWVRYVENKYPELLPYVSSCKSPMEMFGSVVKAYFKEKDSLENRETISVAVMPCTAKKAEAAREEFIRDNIPDVDYVITTAELCAMIKEIGIQFDEIE…	[FeFe] Group A3	[FeFe] Group A3	Bifurcating	Labile	3	[FeFe]-centre, 2 x [4Fe4S] clusters	NADH dehydrogenase, thioredoxin	0.186077	0	0	1.11646	0	0	0	0	0	0	0	0	0	0
WP_024286662.1	MRELSESDRFTITVNNREIQVFGGLTILQALVMEDIEVPSLCHDIRLKRSNGSCGLCVVEVGTEAPRDVKACLTPVQPDMVITTHSPRLEEYRKVRLQQLLCDHNADCVAPCVETCPANIDIQTYLSHVADGNYQAAIHVIKDRNPFPSVCGRVCPHPCESECRRSLVDEPVAINYVKRFAADWDMAQDEPWIPRVDAPTGKRIAVVGAGPSGLSAAYYSAISGHAVTVFEKQDHAGGMMRYGIPEYRLPKATLDQEIGVIQALGVQIVTGKALGTHLSLEDLKRDFDSVYLSIGSWRATPLGIDGDRNERVELGIDYLRHIAKGSTRSRGDTVVVIGGGNTAIDCVRTALRKGAKSVKLIYRRTRDEMPAEAFEVAEALHEGVEMIFLTAPTKITTAE…	[FeFe] Group A1	[FeFe] Group A1	Evolving	Labile	1	[FeFe]-centre, 3 x [4Fe4S] clusters, 1 x [2Fe2S] cluster	None	0	0.24354	0	0	0	0	0	0	0	0	0	1.46124	0	0
WP_024346172.1	MGNRTIVPFGPQHPVLPEPIHLDLVLEDERVVEAIPRIGYVHRGLEKLVEKKDYQQYVYVAERICGICSFMHGMGYCMSIESVMGAEIPDRAKFLRTIWAELSRLHSHLLWLGLLADAFGFESLFMQSWKLREQVLDIFEETTGGRVIFSVCDIGGVKKDIAPETLSRIREVMNRMEMELKEAASVFLNDSTVRLRTKGVGVLSKQAAFELGAVGPMARASGIEMDLRSQGYAAYDKLDFKPVTDQGGDCYARTKVRIREMFHSMDLIRQCIAIIPDGEIKRKVTGNPKGENFTRLEQPRGEVLYYTKANGTKFLDRVRVRTPTFANVPALLETLKNCSLADVPILILTIDPCISCTER	[NiFe] Group 4e	[NiFe] Group 4e	Evolving	Sensitive	6	[NiFe]-centre, 1 x [4Fe4S] clusters	NuoL, NuoH, NuoC, [FeS] protein	0.134815	0	0	0	0	0	0.808891	0	0	0	0	0	0	0
WP_024988140.1	MAFTNNIMIVRHKLLADLVRLWKNDELVEKIDRLPIELSPRKSKPLGRCCIHKERAVWRYKTFPLMGLDMTDEHNEVTPLSEYARLALSRPEPEKENIMCVIDEACSSCVQINYEITNLCRGCVARSCYMNCPKGAIRFKKNGQAMIDHDTCVSCGICHRSCPYHAIVYIPVPCEEACPVKAISKDEHGIEHIDESKCIYCGKCMNACPFGAIFEISQTFDVLQRIRKGEKMVAIVAPSILGQFKTSIGQVYGAFKEIGFTDVIEVAEGAMATTSNEAHELLEKLEEGQPFMTTSCCPSYIELVEKHIPDMKPYVSTTGSPMYYAARIAKEKHPDAKVVFVGPCVAKRKEARRDEAVDYILTFEEIGSILDGLGIELEQVQEFSILHTSVREAHGFAQA…	[FeFe] Group B	[FeFe] Group B	Evolving	Labile	1	[FeFe]-centre, 3 x [4Fe4S] clusters, 1 x [2Fe2S] cluster	None	0.171781	0.74506	0	0	1.03069	0	0	0	0.739501	0	1.04364	1.46124	1.22598	0
WP_026137213.1	MSLVTITIDGREVQVPEGVTILEACRMEGIHIPTLCYLEGLSAWGGCRICVVEVEGQPNLAASCVTPVREGMKIWTSSKKVREARKTNLELLLSNHPLDCQLCDRNGSCELQELAYQFGVREIRFQGERKVYEVDQSSPSVKRDPNRCILCGRCVRTCREVQTVCAIDFANRGFDTVISPSLGLPLGESVCVNCGQCILACPTGALSEVSHVEMVWEAINDPEKFVILQTAPAIRVSIGEPFGLPPGTVTTGKMVAAFRRLGFDRVFDTNFAADLTIIEEGHEFIARLKQGGKLPLITSCSPGWIKFMEHFYPELMENVSTCKSPQQMFGAVAKTYYAQKLGVDPKDMVVVSIMPCTAKKFECQRDEMCASGFRDVDFSLTTREAARMLKEKGIDLKEM…	[FeFe] Group A1	[FeFe] Group A1	Evolving	Labile	1	[FeFe]-centre, 3 x [4Fe4S] clusters, 2 x [2Fe2S] cluster	None	0	0.289106	0	0	0	0	0	0	0.739501	0.995132	0	0	0	0
WP_026327676.1	MKIMIELTIDSKKVQVEEGTTILKAARKAGVEIPTLCHFELCDMGIENKPGGCRICVVEVEGRRNLAPSCMTEAQNGMVIHTHNIRVLNARTTVLKLIISDHPFDCLVCAKSGQCELQSLAIQFGIRSQPYEGEQSRYRKDTSPSIIRDVDKCIMCRRCEMMCNEVQTVGALAAVNRGFMSVVAPAFEMNLEDSPCTYCGQCVSVCPTGALTEVDHTNDIIRALSDPTKTVVVQTAPAVRAALGEEFDLPPGTLVTGKMVSALRELGFDYIFDTDFSADLTIMEEGTELLQRLQRYLAGDTEVRLPILTSCCPGWVNFFEHNFPDLLDVPSTAKSPQQMFGAIAKSYFAEKIGVSRKDMIVVSIMPCLAKKYECQRDEFKADGNPDVDYSISTRELAAF…	[FeFe] Group A3	[FeFe] Group A3	Bifurcating	Labile	2	[FeFe]-centre, 3 x [4Fe4S] clusters, 1 x [2Fe2S] cluster	NADH dehydrogenase	0	0.53604	0	0	0	0	0	0	0	1.99026	0	0	1.22598	0
WP_026393504.1	MKEVTFKINGQEMTVPEGTTILEAARQSNIDIPTLCYLKDVNEIGACRMCLVEIAGARALQAACVYPVANGIEVLTNSPAVRKARRVNLELILSNHNRECTTCVRSENCELQSLATDLGVSEIPFEGDKSGTLVDDLSTSVVRDETKCILCKRCVSVCTNVQSVAVLGSVGRGFTSQVQPVFNKSLAEVGCINCGQCIINCPVGALKEKSDIQRVWDAIADPSKTVIVQTAPAVRAGLGEEFGYPMGTSVTGKMAAALRRLGFDKVFDTDFGADVCIMEEGTELIGRVTNGGVLPMITSCSPGWIKFIETYYPEAIPHLSSCKSPQNITGALLKSHYAQANGIDPKDMVVVSIMPCTAKKYEVQREELCTDGNADVDISITTRELARMIKEARILFNKL…	[FeFe] Group A3	[FeFe] Group A3	Bifurcating	Labile	4	[FeFe]-centre, 3 x [4Fe4S] clusters, 1 x [2Fe2S] cluster	NADH dehydrogenase, thioredoxin, thioredoxin	0.323832	0	0	1.11646	0	0.826529	0	0	0	0	0	0	0	0
WP_026835345.1	MAKRSIVPFGPQHPVLPEPIHLDLVLEDETVVEALPSIGYIHRGLESLVAKKDFNEMAYVTERICGICSFMHGMGYCSTIEKIMGLEVPERANYLRTIWCEMSRLHSHLLWLGLLADAFGFEALFMECWKIREKILDMFEESTGGRVIFSVNKIGGVLKDMPAEMLADFMKRLDGMQKELKKATKVFMNDYTVKSRLEGIGILSKEDAIACGAVGPMMRASGIEVDMRKTGYAAYKDIDFQVITSDRCDSYGRCEVRIGEIFQSIEIIRQAIAQIPDTELSVMAKGFPKGEAFVRFEQPRGEAFYYSRANGTKNLDRMRVRTPTFANLPSLVKILQGAQYGDVPLLVLTIDPCISCTER	[NiFe] Group 4e	[NiFe] Group 4e	Evolving	Sensitive	6	[NiFe]-centre, 1 x [4Fe4S] clusters	NuoL, NuoH, NuoC, [FeS] protein	0.388368	0	0	0	0	0	1.61778	0.712424	0	0	0	0	0	0
WP_026888482.1	MSKYMVIDGNRIEFDREKNILDLVRKAGIDLPTLCYYTDLSVYGACRMCVVEDERGSILTSCSTPPKDMMSIRTNTPKLQKYRKVILELLLATHCRDCTICEKNSKCKLQKLALRFGLTNIRFKSIEGKKDLDTSSKSIIRDPNKCILCGDCVRMCNEIQSVGAIDFAHRGSNMVVSPAFGKSLADTDCVNCGQCATVCPTGAIIIRSDIKNVWKAIYNPKQRVVVQVAPAVRVALGEEFGIKSGENVMGKIAAAMRRLGFENIYDTSLSADLTVIEESKEFLKKLESDDNEFPLFTSCCPAWVRYVENKYPELLPYVSSCKSPMEMFGAVVKAYFKEKDSLEDRETISVAVMPCTAKKAEAAREEFISDNIPDVDYVITTAELCAMIKEIGIQFNEIE…	[FeFe] Group A3	[FeFe] Group A3	Bifurcating	Labile	3	[FeFe]-centre, 3 x [4Fe4S] clusters, 1 x [2Fe2S] cluster	NADH dehydrogenase, thioredoxin	0.969268	0	0	2.23292	2.06137	0	0.808891	0.712424	0	0	0	0	0	0
WP_026891848.1	MQTFKELYESTVRSVLDDGSVSPEAGNYDPYHLDCLLNPEKHPIVIRTGKCNCSKDEKCDCLERCPFGALSMGKDGVEVDPELCLGCDNCIEGCAREKLTASTDIIPALKAIRGSKGLVYAMIAPAFLGQFTNDVTPGKLRNALKEVGFDGMLEVALFADILTLKEALEFDKNIVNDGDFQLTSCCCPMWIGMIRKVYHQLLPHVPGSVSPMVACANVVKALHPDAMTVFIGPCLAKKAEAREKDLVGAVDYVLTFQEVKNIFDALGIDPADMEESEKDHSSRAGRIYARKGGVSEAVELTVKAIDPEKKTKIITKRADGVPACKKMIQDIMEGNIEANFYEGMGCVGGCVGGPRSILDVEHGTKLVNEYGKNATYQHPAENPYVIELLHRLNLDTIES…	[FeFe] Group B	[FeFe] Group B	Evolving	Labile	1	[FeFe]-centre, 2 x [4Fe4S] clusters	None	0.253553	0	0	0	0	0	0.808891	0.712424	0	0	0	0	0	0
WP_026892185.1	MGIIDFKATKCKHCYKCIRNCEVKAVMIRNERAEIMPDQCILCGKCMQVCPQSAKTLISDLELVKDYIRQGKRTVISLAPSYMGLLKYNSIGQVNGALKKLGFSDVRETAEGAALVTAEYTRLLEEGKMDTIITTCCPGVNDLIEIYYPQLIGHLAPVVSPMIAHGKLLKREMGYDTKVVFLGPCIAKKKEAEDPRHAGYIDAVLNFVDLKRWLLEEGISVEECEDIPFTNENPRVNRLYPVTNGIISSVVATEKEQDHYRKLYVHGIKSCIDLCESIKEGSMNGCFIEMNICSGGCINGPMVEDEKISRFKVKLDMEESIEKEPVPWEEISPKIDRISFQKHFMDRAPEEAMPTEAQIKEIFKMTGKLKPEDELNCGACGYSTCREKAIAVFQKKAEL…	[FeFe] Group C	[FeFe] Group C3	Sensory	Labile	3	[FeFe]-centre, 2 x [4Fe4S] clusters, PAS domain	Phosphatase, thioredoxin	0.700843	1.35714	0	0	1.03069	1.65306	0.808891	0.712424	0.739501	1.99026	2.08728	1.46124	0	1.86457
WP_026892187.1	MATSDATLHRITHQVLLEVAKYVWEDKIEESRNEIPYHIIPGPKAQFRCCIYREREIIRERVRLAEGLCPSGKDTTNIVQVINSACEGCPIARYVVTDNCQLCMGKACQASCNFGAITMGHDRAHIDPDKCKECGKCSQACPYNAIADLTRPCKKSCPVDAITMDENDIVVIDEKKCIQCGACVNGCPFGAIGTKTFLADVIRLIKAGKKVVAMVAPATEGQYGPDITMASWKTALKKAGFADMVEVALGGDLTAAAEAAEWAEAYEEGKKMTTSCCPAFVNMIRQHYPMLLENMSTTVSPMCAVSRMLKEKDPETVTVFIGPCIAKKSESLDLNVKDNADYVLTLGEAVALMQAKGVELEPEENTYQQASVFGKRFGNGGGVTAAVLECLKETEKNTD…	[FeFe] Group B	[FeFe] Group B	Evolving	Labile	1	[FeFe]-centre, 3 x [4Fe4S] clusters, 1 x [2Fe2S] cluster	None	0.834154	0.898699	2.36715	1.11646	0	0	0.808891	0.712424	1.479	0	0	1.46124	2.45195	0
WP_026894719.1	MKFIDFDKDKCNNCYKCLRTCPSKAITILEHHAEIVDDVCIYCGKCQVICPQGALSIKDDVSKVKDAIRDNKKVIATVAPSFVGAFDMDNPKQIVTGLKNLGFDIVEETAIGAEIVFEYYKRYIREGKYKNIITTSCPSANLIIEKYYPQLVEYMLPVVSPMVAHGKILKHMYGMDSYVVFIGPCLAKKSEAEDFQHSQIIDAVLSFDELSDWFENEDIILNQLSNTKFDANSYEGGSSFPIGGLAENCKTEIENGGYELIQVNGVERCKEILECIQNEDIEDICVELNICEGSCVDGPGMPKDGVNYYVREKKVKNYAKSKEICADKDLRELLEWEKEISFEKTYFNKRVKRKKATEEELQEILRKMGKHGEEDELNCTACGYRTCREKAESVYEGMS…	[FeFe] Group C	[FeFe] Group C3	Sensory	Labile	2	[FeFe]-centre, 2 x [4Fe4S] clusters, PAS domain	Phosphatase	0.323832	0	0	1.11646	0	0.826529	0	0	0	0	0	0	0	0
WP_026894721.1	MRKFENQVQLIKYEVLKEVSKLAFKGTIKEERHKIPKTIIPGPEPRSRCCIYKERAIIEDRVELAMGGNKENKNIIEVLDIACDACPINRFVVTEACRGCLAHRCSEACPVGAIRHVGHKAYIDNNKCVECGRCREACQYNAIADVMRPCREACPVGALSIDKDKKAVIDNEKCIQCGACVYQCPFGAIVDKSFIVEVIDLLNRAKEEDIHVYAAIAPAISSQFYYAKIGQVVNGLKKLGFYDVVEVALGADIVAQHEAEEFKETIEDKGVMTSSCCPAFVSHINKNYPMLKDKVSSSVSPMIAISRLIKNIDDNAKVVFIGPCIAKKMEIKEKDLYGTTDYVITFEELAAMLDGAEIDLEYLEEDSLDNASFYGRVFARSGGLTEAIRHVVGKEKYDI…	[FeFe] Group B	[FeFe] Group B	Evolving	Labile	1	[FeFe]-centre, 3 x [4Fe4S] clusters, 1 x [2Fe2S] cluster	None	0	0.204329	0	0	0	0	0	0	0	0	0	0	1.22598	0
WP_026895551.1	MNMVNITIDGQNIQVPQDYTVLEAARSAGIDIPTLCYLKDINEVGACRMCIVEVKGARRLEASCVLPVSEGMVVKTNTKKIREARKATLELILSNHNGDCKTCERSGKCELETLANELGVTDIGFTGEMNTYTIDDLSPSIVRDPNKCILCGRCVNVCKNVQNVGVLSFVERGFNTMVAPSFNMSLSEVPCINCGQCIAACPVGALKEKNEIDLVWEALEDDSKHVVVQTAPAVRAALGEEFGLPIGTRVTGKMAASLRRLGFDKVFDTDFAADLTIIEEGYELLGRLKNDGKLPMITSCSPGWIKYCEYNYPDFLDNLSSCKSPHEMMGAVIKSYYAEQNDIDPKDIFVVSVMPCTAKKFEADREELAATGYPDVDAVITTRELAKMIKEGRVDFLSL…	[FeFe] Group A3	[FeFe] Group A3	Bifurcating	Labile	4	[FeFe]-centre, 3 x [4Fe4S] clusters, 1 x [2Fe2S] cluster	NADH dehydrogenase, thioredoxin, thioredoxin	0.691229	0.321236	1.18357	0	0	0.826529	0	2.13727	0	0.995132	0	0	0	0.932283
WP_027088814.1	MSKIKMTINNREVEAYEGQTILEAAKNNGIHIPTLCYLKDVTGTGACRVCQVEVEGAKTLCAACVYPVREGLVVKTNSQRALNARRHVVELIVSNHSKDCLSCIRNTNCELQRLCQELGVREDAFAGEKTTPTFDEVSPGVVRNTSKCVLCGRCVETCAKHQGLGILGFMNRGFKTKVGPVYDKSLNDVNCMQCGQCINVCPVGALHEKEEVHNVIFALNDPTKHVIVQTAPAVRASLGEEFGMPIGTRVTGKMVHALKLMGFDKVYDTNFGADLTIMEEGHEFISRVQNNGVLPMITSCSPGWVNYIEHEYHELLDHLSSCKSPHMMLGAMIKSYYAEANNIDPKDIYVVSVMPCVAKKGEKEREENLTDGLKDVDAVLTTRELGKLIKMFGINFRDL…	[FeFe] Group A3	[FeFe] Group A3	Bifurcating	Labile	4	[FeFe]-centre, 3 x [4Fe4S] clusters, 1 x [2Fe2S] cluster	NADH dehydrogenase, thioredoxin, thioredoxin	0.27257	0.69141	0	0	0	0.826529	0.808891	0	0	0	0	2.92248	1.22598	0
WP_027096606.1	MINLTINGLPCQATKGSTILEAAIENDFHIPTLCHLKDVHKFGTCRICVVEQVGAKNLQASCMVEAQEGMEIYTHSDRVRRARKTLYQLMLSDHNKNCLSCIRNQDCDLQAMGRELGVLSDPYAGANNPGKPDFSESILRDSTKCILCRRCVTVCNDIQQVCVLNAQSRGFLTTVSPAANMRLGESNCTYCGQCVSVCPVGALAETSHKERVWQALGDPEKFVVVQTAPAVRVGIGECFGLEPGTSLTGKMVTALQVMGFDAVFDTNWGADLTIMEEGTEFLNRLKDTLTGKQATLPMMTSCSPGWVKYIENHFPDHLDHLSTCKSPHTMLGAVVKHYYAKKIGKNPEDMYVVSVMPCTAKKTEIARREMCNDGVPNVDAVLTTRELGDMIRSTGTNFL…	[FeFe] Group A3	[FeFe] Group A3	Bifurcating	Labile	3	[FeFe]-centre, 3 x [4Fe4S] clusters, 1 x [2Fe2S] cluster	NADH dehydrogenase, thioredoxin	0.786131	0.476616	0	1.11646	2.06137	0.826529	0	0.712424	0	0.995132	0	0	0	1.86457
WP_027191085.1	MADSKPQVMKTPQSTFTGPVVVDPVTRIEGHLRMVVEVEAGKIKNAWSSSQLFRGLEIILKGRDPRDAQHFTQRSCGVCTYVHALASTRAVDNAVGVKVPENATIMRNLVMASQYLHDHIVHFYHLHALDWVDVTSALKADPVKAAQIANSISPRKTEASALKAVQDKVKALVDSGQLGIFTNAYFLGGHQSYYLPPEVNLIATAHYLEALHLQVKAARAMAIFGAKNPHTQFTVVGGCTNYDALRPERIAEFVTLFKEVKKFVDEVYIPDLLTVASYYKDWAAIGGTSNFLCFGEFPQKSEFGFDDRFLPAGYIMKRDLKGVKPVDPKQIMEHVAHSWYKGNEAKHPYEGVTDPQYTNLDDKDRYSWMKAPRYMNEPMETGPLAKVLVAYSKGHKATV…	[NiFe] Group 1b	[NiFe] Group 1b	Anaerobic Uptake	Sensitive	3	[NiFe]-centre, 2 x [4Fe4S] clusters, 1 x [3Fe4S] cluster	Cytochrome	0	0.17394	0	0	0	0	0	0	0	0	1.04364	0	0	0
WP_027338924.1	MSEITVTIDGEKVQVKEGANILDAARKINVDIPTLCYLEGVNEPAGCRVCVVEIEGEVGLQPACKYKAKEGIKVKTNTPEVLRARKTVLELLLSDHPFDCLTCAANLNCELQSLADQFNIRQIKFQGEKNEYPIDDLSPAVVREPSKCIACRRCISVCSEVQEVHIYDVLERGFPVVAGPAFNDSLLDTPCIACGQCILVCPTGALHGKDDKEQVWRALRDPDKHVIIQTAPAIRVTIGEMFGMEPGELVTGRLVGALKRLGFDKVFDDCFGADVVVMEEGTELIERLENGGDLPQFTSCCPGWVKFCESFYPELIPNLSSCKSPQQVFGALVKTYYAEQSGVDPKDIFSVSVMPCVAKKYEAGREEMNDSGQDRDVNVNLTTRELGEMIREAGLDLNK…	[FeFe] Group A3	[FeFe] Group A3	Bifurcating	Labile	3	[FeFe]-centre, 3 x [4Fe4S] clusters, 1 x [2Fe2S] cluster	NADH dehydrogenase, thioredoxin	0.171781	0	0	0	1.03069	0	0	0	0	0	0	0	0	0
WP_027364046.1	MSQVSLTIDGIEVQAAPGTSVLEAAKKAGIKIPTLCYLEEINEIGACRICLVEVQGARTLQASCVTPVAPGMVVRTNTPAVRHARKLNLELIMSNHPQECLTCPRSTNCELQQLASELGITEIRFSGANPSYEPDLSSASLVRDPRKCILCRRCVSVCEKVQQVSAIAPQERGFNTIVAPAFLEPLGDTACVNCGQCALVCPTAAIHEKDQTAEVWAALSDPRKHVVVQTAPAVRVSIGEMFGLEPGSVVTGQMVAALRKLGFDKVFDTDFTADLTIMEEGSELLQRIQNGGRLPLITSCSPGWIKFIEHFYPRLLPHLSTCKSPQQMFGALAKTYYAEKSGIDPADIFVVSIMPCTAKKFEAGRQGMNGSGYQDVDVVLTTRELGRMLKEAGIDFNSL…	[FeFe] Group A3	[FeFe] Group A3	Bifurcating	Labile	3	[FeFe]-centre, 3 x [4Fe4S] clusters, 1 x [2Fe2S] cluster	NADH dehydrogenase, thioredoxin	0.186077	0.575251	0	1.11646	0	0	0	0	0	1.99026	0	1.46124	0	0
WP_027396346.1	MSNKMSRRKFLKVVAGSGVLGFGVMASGCKGKPSGGDGWVSSQYEGKGDFPVNLKGRVAISATNPSIERDDEKCILCGQCVDACKNVMGVYGNYPLPLKQEIACVGCGQCVMQCPSGAITEKSHVRKVLDALDDDTKHVVVQTAPATKVSLGEEFGMPQGTSVGKKMAGALKAAGFDSVFDTCFAADLTIMEEASEFVHRLTKKKDEIPHLTSCCPGWVKYCEYFYPELMHNLSTCKSPQNMLGATIKSFYADKMGINPSNIVNVSIMPCTAKKFEVGREELEVDGQQDMDYVLTTRELAVLLKHKGIDLNTVAEAEYDSVLGESTGAGRIFGATGGVTEAAVRTAYYLATGSNPPADLLDWKPIRGMQSVKEAVASIPGVGAVNIAVCHGLENARQLL…	[FeFe] Group A1	[FeFe] Group A1	Evolving	Labile	1	[FeFe]-centre, 2 x [4Fe4S] clusters	None	0.171781	0	0	0	1.03069	0	0	0	0	0	0	0	0	0
WP_027398114.1	MNKKYITIDGILAPIEGEKNILDIIRKIGIELPTFCYNSDLSVYGACRMCVVEDKHGNIMASCSTPPRSGMEIKTNTPKLQQHRKMILELILADHCRDCTTCEKNFKCKLQDIAQKFGLREVRFENYSPWEEKDTSSPSIVRDSNKCILCGDCVRMCSEIQKVGAIDFAYRGSNMEITPAFKMPIAETNCVNCGQCSAVCPTGAIVVKDDTEKVWHDLYDDNVIMVAQIAPAVRVALGDEFGIPEGSNVMGKIVTALKRMGFDDVYDTATGADLTVIEEANEFVDRLENGGKLPLFTSCCPAWFKYAEINHPDITDNISSCKSPMQMFASVLKEQARKERPKKKAKKTKVVAIMPCTAKKYEANREEFKFEDDQAVDYSITTQELANMIRESGIVFSEI…	[FeFe] Group A3	[FeFe] Group A3	Bifurcating	Labile	3	[FeFe]-centre, 3 x [4Fe4S] clusters, 1 x [2Fe2S] cluster	NADH dehydrogenase, thioredoxin	0.323832	0.910627	0	1.11646	0	0.826529	0	0	0.739501	0.995132	0	0	0	3.72913
WP_027398115.1	MGIIQFKKANCKHCYKCVRKCYVKAIALKDEQAQIIERECILCGQCFLVCPQNAKYIKTDIYKIKNYIKRGEKVYVSLAPSFASAFDGISFRVMSSALKRLGFMGVEETAIGAGMVTAEYEKILKSGKMRNMITTCCPTVNLLIENYFPDLLQYAAPVVSPAIAHGQVLKKVYGKDIKVVFVGPCISKKYEAEKSISINATLMFDELLNWLEEENISLNKLDENPTEMHGIVNRLYPIPGGILKTVSNDSKKTYKSIAVDGLDRCIQMLEALREDLYARKEIKGYFIEMSACPGSCSYGPALKDYDKPLLLARENIIENARKCTHTKIPKTETEKVDLFYEYENLQAPEDLPSEDELNAILESMGKTSEKNIYNCGACGYDTCREKAIAVWQGKAEIKM…	[FeFe] Group C	[FeFe] Group C3	Sensory	Labile	3	[FeFe]-centre, 2 x [4Fe4S] clusters, PAS domain	Phosphatase, thioredoxin	0.253553	0	0	0	0	0	0.808891	0.712424	0	0	0	0	0	0
WP_027399701.1	MGKRTIIPFGPQHPVLPEPVHLDLVIEDETVVEAIPSIGFIHRGLEKLVEKKEYTEMVYVIERICGICSFGHGWGYCLSVEGVMGVEIPERANYLRTIWHELSRMHSHLLWLGLLADGFGFESLFMHCWRIREKVLDIFEKTTGGRVIFSVCKVGGVRKDIDEATLKEISSVVDGMKKELKELADVFLEDYSVKNRLCGVGYLSKEDAAELAAVGPMARASGLKQDMRLLGHGVYDKLGFEPCIETAGDSYARCKVRIREVFQSIDLIIKAIEMIPDGDISVPVKGNVPANECVVRLEQPRGEAFYYAKGADSKFLERMRVRTPTNQNIPAMVKTLQGCDLADVPMLILTIDPCISCTER	[NiFe] Group 4e	[NiFe] Group 4e	Evolving	Sensitive	6	[NiFe]-centre, 1 x [4Fe4S] clusters	NuoL, NuoH, NuoC, [FeS] protein	0.197262	0.645421	1.18357	0	0	0	0	0	1.479	0	0	1.46124	0	0.932283
WP_027399804.1	MSQNYMIINGEKVPYTDERNILEVVRKAGIDLPTFCYYSDLSIYGACRMCIVEDNRGGIITSCSTPPKNGMEIKTNTPKLHKHRKLILKLLLSSHCRECTTCSKSGDCRLQDLARRFGIQQIKFDKTQKAYKDEYTIDRSSPSITRDPNKCIQCGDCVRMCSENQNVGAIDFALRGYELMVCPAFDDPIAETDCVNCGQCAAVCPTAAIVVNNQVEEAWKAIYDKNKRVVVQIAPAVRVALGEEFDLPPGESVMPLIVAAMRKIGFDEIYDTSFSADLTVIEESNEFLEKLKSGAKLPLFTSCCPGWIKYVENRHPDLLPQISSCKSPMGMFSSVFKEYASKPENKMDDRETFVIAIMPCTAKKYEASREEFKTNGKVDGKYDTDLVLTTQELANMIWE…	[FeFe] Group A3	[FeFe] Group A3	Bifurcating	Labile	3	[FeFe]-centre, 3 x [4Fe4S] clusters, 1 x [2Fe2S] cluster	NADH dehydrogenase, thioredoxin	0.596402	0	0	1.11646	0	1.65306	0.808891	0	0	0	0	0	0	0
WP_027400569.1	MKTCTLSINNKQITVPEETTILEAAKKLNINIPTLCYHPDQKVKANCRICLVHDKSSDKFVTACSTKVTDGAEILTNTQEVRDLQKGVLELIIANHPNDCLNCIRSGSCSLQDLCRRFNINNSDMINNIDTYVIDNTSGVLVRDRNKCIKCMRCVEVCQETQMVGVLSPYNRSVNTNVGAGFNTNLDKTLCTFCGQCSSVCPVGAIYENDETEKAWEAINDPNKHVVVQVAPAVRVALGDELGISRGEEVTGKMITALRMLGFDKVFDTNFTADLTILEEGNELLHRIKTGGTLPLITSCSPGWINYAEGFFPDLLEHVSTCKSPQQMFGAVAKTYYAKKMDIDPAKVFVISIMPCTAKKFEAARPDINSSGFRDVDVVLTTRELTRMIKSAGIDFADL…	[FeFe] Group A3	[FeFe] Group A3	Bifurcating	Labile	3	[FeFe]-centre, 3 x [4Fe4S] clusters, 1 x [2Fe2S] cluster	NADH dehydrogenase, thioredoxin	0.134815	0	0	0	0	0	0.808891	0	0	0	0	0	0	0
WP_027431522.1	MGKRSVIPFGPQHPVLPEPIHLDLVVEDERVIEAIPSIGFIHRGLEGLVKKKDYNTMTYIVERTCGICSFQHGMGYCETIEHIMDVEVPDRAKLLRTIWAELNRMHSHLLWLGLLADAFGFENLFYQCWRIREKVLDLHELTAGARLIFSVNTIGGVKRDIDEDKQRTILETLSEVEKELKVIEKTFFYDYTVESRLKGVGILSKEKVHELGCVGPFARASGLAVDLRKLEYAGYSKIDFEPITSNDCDSYARCYVRLKELYQSIDIIRQAIAKLPADKTLSTPVKGNPNGEFIMRVEQPRGEAFYYAKANGTPYLDRIRVRTPTFANIAGLCEMLKNTELADVGLLVLTIDPCISCTER	[NiFe] Group 4e	[NiFe] Group 4e	Evolving	Sensitive	6	[NiFe]-centre, 1 x [4Fe4S] clusters	NuoL, NuoH, NuoC, [FeS] protein	0.137755	0.15538	0	0	0	0.826529	0	0	0	0	0	0	0	0.932283
WP_027637394.1	MQSEKKMVNIKINNIPLKVEAGTTIIEAAKLIHIDIPHLCYHPDQTVKAHCRMCVVEVVGSRKLLAACSTVVWEGIEVHTDTKRVRDTQVGILELILANHGQNCLSCARNQNCELQDLCSRFNILRPTLPSVNVKQPMQIKNPSIVRDLSKCVKCGRCVKVCKEVQGISALTYSNRSSNFMVTTAYNKPLEDTDCTFCGQCSVVCPVGAIVELDDTQRVWEAMHDPKKHVIVQVAPAVRVALGDSLGLKPGTIATGKLVTALKMLGFDKVFDTNFAADLTIMEEGSELLDRIKNGGPLPMITSCSPGWINFMEKNFGDLLEHLSTAKSPQQMFGAVSKSYYAKKTGIDPHDIVTVSIMPCTAKKYEATRPEMEHDGIPDVDIVITTRELIKMIKYVGLK…	[FeFe] Group A3	[FeFe] Group A3	Bifurcating	Labile	3	[FeFe]-centre, 3 x [4Fe4S] clusters, 1 x [2Fe2S] cluster	NADH dehydrogenase, thioredoxin	0.197262	0.613725	1.18357	0	0	0	0	0	0	0.995132	0	1.46124	1.22598	0
WP_027637669.1	MRKFESQVQLIKYKVLKDIIERTINGTFVESRYKMPKEILSSDEPLTRCCIYKEREIVSQRIDVAADPLNDDECVINILSIACDECPVKRFQITEACRGCLAHKCIQVCPRDAIIIENGRAVIDQKKCIECGRCKDACPFNAVSDVMRPCKKACGSKAIKIREDKKADIDRDKCTSCGACAYKCPFGAISDRSEIIPIVKSLESYKKDKKQKVYAVVAPAIASQYHAQAGQIIAAIKKMGFSDVIEAALGADIVAYHESLEFAERVGKNGEVCMMTSCCPAFVEHVRKNHPAVAEHLSTMVSPMVAIARFIRKTDEDCKIVFIGPCTAKKEEARVEELKDAVDYVMTFEELEAMIDAYNIVVEECEAEPMENASPFGRVFARSSGVKDAVVQAIKEEGL…	[FeFe] Group B	[FeFe] Group B	Evolving	Labile	1	[FeFe]-centre, 2 x [4Fe4S] clusters	None	0	0.12325	0	0	0	0	0	0	0.739501	0	0	0	0	0
WP_027640431.1	MVTNDATILRLKHDVLYEVAKAAWEGNLDEKRERIPYSMIPGPQAIYRCCIYKEREIIRQRVRLAEGKCPTGKDTSNVVQVINAACEECPIASYIVTDNCRKCMGKACQNSCNFGAISMGRERAYIEPGKCKECGKCSQACPYNAIAHLERPCKKICPVDAITYDEYGICVIDEKKCIQCGACIHSCPFGAIGSKTFMVDVIRLIKAGKRVVAMVAPATEGQFGPDITMASWKIALKQLGFADMIEVGLGGDMTAAYEAEEWAQANKEGKKMTTSCCPAFVNMIKQHFPMLLENMSTTVSPMCAVSRMIKSQNPDTVTVFIGPCIAKKSESMDLNVKGNADYAMTFGEIRAMMRAKGVELQPAENDYQESSVFGKRFGNGGGVTAAVLECLKEMDENTD…	[FeFe] Group B	[FeFe] Group B	Evolving	Labile	1	[FeFe]-centre, 3 x [4Fe4S] clusters, 1 x [2Fe2S] cluster	None	0.134815	0.983172	0	0	0	0	0.808891	0	0	0.995132	0	0	4.9039	0
WP_027642172.1	MDKFYHSVRLDESLCKGCINCIKRCPTEAIRVRGGKASINNKFCIDCGECIRVCPHHAKLATYDKLDVMKKYKYTVALPAPSLYSQFNNLDDVNIVLNALLLMGFDDVFEVSAAAELVSEATRQYISEHEEQLPLISTACPSVVRLIRVRFPNLIPHLLPINPPVEVAAALAIRKAMEDTGLPREQIGIIFISPCPSKVTYVKSPLGTEKSEIDQVLAIKDVYPKLLACMKTVVGEDYPVIGTSGKIGISWGHSGGEASGLFTENYLAADGIENVIRVLEDMEDQKFTNLRFVELNACNGGCVGGVLTVENPYVAEVKLKRLRKYMPVARSHMHESEENVIKWTTGVQYEPVFRLGNNMMESFSRLNQVERLMKKFPGLDCGSCGAPTCKALAEDIVRG…	[FeFe] Group C	[FeFe] Group C1	Sensory	Labile	2	[FeFe]-centre, 2 x [4Fe4S] clusters, PAS domain	Histidine kinase	0	0.36679	0	0	0	0	0	0	0.739501	0	0	1.46124	0	0
WP_027642984.1	MRGVETRIQEIRHRIFREVARMAYHTEWPVDKRIEELPYKIIPGEVGNFRNDVFLERAIVGERLRLAMGLPYRSAAEHAPVSDNIEAADRPETYYTPPLINVIKFACNACHEKRVFVTDGCQGCLAHPCEEVCPKDAIKLDRTNGRSHINDDKCIKCGRCADVCSYKAIIIQERPCAAACGMDAISTDENGKADIDYDKCVSCGMCLVNCPFGAIADKSQIFQVIRAIQSGERVYAAVAPAFVGQFGPKVTPGKLRAAMKALGFADVFEVAVGADLCATQEAIDFIREVPEKLPFMATSCCPAWSMMAKKLFPEHADCISMALTPMTLTARLIKRHHSNAKVVFIGPCAAKKLEAMRTDIRSDVDFVLTFEEMDGIFDARHVDMEKIEEDPEGVNDASA…	[FeFe] Group B	[FeFe] Group B	Evolving	Labile	1	[FeFe]-centre, 2 x [4Fe4S] clusters	None	1.23989	0	1.18357	1.11646	2.06137	1.65306	0	1.42485	0	0	0	0	0	0
WP_027643016.1	MSDRCMKSVPVSLNNPSIEKNQDLCADCSHCLAVCSEEIGVARQWADISADAFSCIHCGQCAAVCPERAIRGKSHWREVVRAINDPQNIVVFSTAPSVRVGLGECFGGRPGDFVEGRMVSALRELGADYVLDVAFSADLTIMEEGTEFLRRFLTGSHPLPQFTSCCPAWVKYVETFHPDRIGCLSSAKSPISMQGALIKTYFAREQGIDPGRIVNVAVAPCTAKKFEISREELCSSGIYQGIPGLMDNDYVLTTRELAEWITESGIEFYGLDPSPFDSLMGEGSGAGVIFGNTGGVMEAALRMAYSVVSGKEPMDLLLKYWPVRGLDQVKETVVSLGGRDVRAAVIYGTRAAEQLIGTGNIDSYDFVEVMTCPGGCISGGGQPDNGVLPVPDRLRMERI…	[FeFe] Group A1	[FeFe] Group A1	Evolving	Labile	1	[FeFe]-centre, 2 x [4Fe4S] clusters	None	0	0.17394	0	0	0	0	0	0	0	0	1.04364	0	0	0
WP_027717491.1	MQPYFHSVRLDENKCKGCTNCIKRCPTEAIRVRKGRARIIEERCIDCGECIRVCPNQAKLAITDSLERLGEFRYTVALPAPSFLAQFKSEVAPEKVWGGLLTLGFDEVFEVALAAEAVSWAIREYLQSNPDRPRPLISSACPAVVRLIQVRFPSLLGHIIPIESPMEIAGRLARERVCRMTGFPGHQVGTFFITPCPAKVTEVKQPFGGISSVDGAISMSDLYGALLRRLETAKAYPLPLRASGLGIGWGRAGGENEAIRAGSLLAVDGIHNVIGVLEEIERGGLADIDYLEAQACTGGCIGGPLVPQNPFVARVRMGNLVKSHRSQEEWDFPRELGFYHRKVSISARPALKLAEDPQLALARLEEAEKISRELPGLDCGSCGSPSCRALAEDIVQGYA…	[FeFe] Group C	[FeFe] Group C1	Sensory	Labile	2	[FeFe]-centre, 2 x [4Fe4S] clusters, PAS domain	Histidine kinase	0	0.165855	0	0	0	0	0	0	0	0.995132	0	0	0	0
WP_027718651.1	MGDQTLFPVTTVAERCRDCYRCIRSCPVKAIRIEAQKDKIRARIEENLCVLCGRCVLACPQGAKKVTSGLERVREWLASGAFVAASVAPSFAGVLPLGHSLVLPAILKTLGFALVQETSWGAELVCRAQREIEGRPPFISSACPVVVNLVEKHYPELISHLVPLVSPMIAHGRWIKHRYPQARVVFIGPCIAKKEEALHFPEAIDAVLGFDELWQWIKEEGVSFEHFAPAEFDPPHPRRATLFPVEGGALHTLSLGTDMLDTRVVAISGLVNCIDFLSQLQRGRIEHPPHFIELLACNGGCIGGPLAVIDEDIFVRRQRVIEYYQTRLRSVASLDVRENFMPLPPLQRAFRDRKIRRPEPPEEAIRQILAQTGKYRPEDELNCGACGYNSCREKAAAVY…	[FeFe] Group C	[FeFe] Group C3	Sensory	Labile	2	[FeFe]-centre, 2 x [4Fe4S] clusters, PAS domain	Phosphatase	0.137755	0	0	0	0	0.826529	0	0	0	0	0	0	0	0
WP_027824154.1	MKARINGQEYEFTANETILEVARRNGIFIPTLCEMHDIRHAPGTCRVCLVGIQREGEPEPVYVTACDTPMVDGVQIFTRTPHVQELRRRQVELILDEHNQDCATCSRHGHCELLDVASVVGMSHRHFSSCQFEPTPPVPQANHSAIVYDATRCIRCLRCVAVCREVQAIDALEFIGRGQQATIALKGGNSRRESDCVSCGQCVMVCPTGALAERDETRTVMDYLVDPDIVTVFQIAPAIRVGLGEAFGLPPGTNVEGQVVAALRAIGADVILDTNFAADLVIMEEGHEVLGRVRQHEGTTFTSCCPGWVDYAEKHHPDILPMMSSTRSPQACLGSLAKSWLPTRMGIDPARVRVVSVMPCTAKKQEAARPQLGRNGVPDVDVVLTIREFARLLRREGVD…	[FeFe] Group A2	[FeFe] Group A2	Evolving	Labile	2	[FeFe]-centre, 3 x [4Fe4S] clusters, 1 x [2Fe2S] cluster	NADH-dependent glutamate synthase	0	0.15538	0	0	0	0	0	0	0	0	0	0	0	0.932283
WP_028026344.1	MGKATVIPFGPQHPVLPEPLHLDLVVQDETVVDVLPQIGFVHRGLEKLVETRDYNQFIYIAERICGICATGHSVGYAETVEELMGVEVPKRAEYLRVIWHELSRVHSHLLWLGLAADAFGFESMFMHCWRLRERVLDIFEKTTGGRVILSVVKVGGVVRDIDATQMAEIIATLEGIKDDYTKIMNTLLTDTSVKNRTVGVGYLSAEDAAALSMVGPFARASNLPYDVRSFGRGAYGDLVDFQPIVATEGDCYARVKVRCLEVLQSFDIIKELAAKMPAGPIEVAVKGTPAEGAEASNVLEQPRGECYYYARGNGTKNLERMRIRTPTSQNLAGMTVALKGCDLADVNMIILTIDPCISCTER	[NiFe] Group 4e	[NiFe] Group 4e	Evolving	Sensitive	6	[NiFe]-centre, 1 x [4Fe4S] clusters	NuoL, NuoH, NuoC, [FeS] protein	0.137755	0.24354	0	0	0	0.826529	0	0	0	0	0	1.46124	0	0
WP_028026422.1	MTRSVIDPITRIEGHLRVEMEVDNGIVQDAWVSGGCFRGMELVVQDRTPEDAAQIVERICGVCPVSHAHASSIAGDKAYGITISNNARIVRNLLEGAQFLHSHILWLYNLAALDYVNPLNALNANVDEAYAVALENGLALHSDLNQLYDKLGAFAKNGQLSIFSGNWFEADKGQAYKLTPELDLILTSHYLEALKMQARASEMAALLGGKMPHVMTSIPGGNMWVPTESKLDDLLAMATEVRDWVNDTVLADTVALAGPYADALTWGKGCGRYIAWGVFEGQGWPYGDDYIEQMKNRYLPMGVLDEKFGVTDVQEDLIQEYMGRSWYEGSETYTSPYFVTDPAYTDYNVDDRYTWVKCPTYDGKPMEAGSMSRIFAAYVRGVPFIKENVDAVLGILGAK…	[NiFe] Group 1a	[NiFe] Group 1i	Anaerobic Uptake	Sensitive	3	[NiFe]-centre, 3 x [4Fe4S] clusters	Cytochrome b	1.03617	0.15538	0	0	0	1.65306	2.42667	2.13727	0	0	0	0	0	0.932283
WP_028027114.1	MSATRISVDHVARVEGHGDIRVVIEDGAVTTCEMAVVEPARLFESMVLGRSFGEVPYIASRVCGICSASHVVTDLRAIERVFGVGVTDRTEALRELLVYGSYLQNHATHLFVFAAPDFLGHKSVFPLADANPELLERALGLKALGNELCTLVGGRSIHPITAVVGGFTHEIDAGEYRRLAEAMDAARDFALASVDLFRDFDTLDIQTEGDLLAMVAPGAYPVCTSDTARFVEGGYEFSAQAVEEEIEEYAVGHSGAFLARARRTGRPYMTAALARVNASWDALCKDARYVAAKAGLRPPERNPFANNIAQAVELVDVLDRCAALCRRLAADEFSGASAPVPFTVRAGRGVGFTEAPRGALFHLLELNGEGRVTRASIMTPTAQNIANLEADMRQLAEKM…	[NiFe] Group 3b	[NiFe] Group 3b	Bidirectional	Tolerant	4	[NiFe]-centre, 3 x [4Fe4S] clusters	Diaphorase, [FeS] protein	0	0.204329	0	0	0	0	0	0	0	0	0	0	1.22598	0
WP_028027642.1	MVTITLNGRAVEVAEGSTLLEAAVAMGVNIPTLCYLKDLNCIGSCRVCLVEVEGQGLVTACNTAAAEGMVVRTDTPQVAAARRANLQAIMDGHRALCATCVRQDTCALRSLSSAFNVQDADEALPVPEPWDADFPLQRDSSKCIKCMRCVAICDKVQHCGVWDFTGVGPSMKVIVRDNLPIADAGCALCGQCITHCPTGALTARDDVNRIMDAILDPAVETVVQVAPAVRAAWGEGVGLSRAEATPGRLAAALHAVGFDKVFDADFAADLTIMEEGSEFVEFLGSDKPRPMFTSCCPGWVRFVKLHYPQFTAQLSSAKSPHQMMGAVVKNTLAAEAAEAGKRLFVVSIMPCVAKKYECDVPELATEADADVDAVLTVREFNRLLRMVGVNCANLTETPF…	[FeFe] Group A2	[FeFe] Group A2	Evolving	Labile	2	[FeFe]-centre, 3 x [4Fe4S] clusters, 1 x [2Fe2S] cluster	NADH-dependent glutamate synthase	0	0.339796	0	0	0	0	0	0	0	0.995132	1.04364	0	0	0
WP_028086317.1	MGIMTIDGQRVEFTDEPNVLSVIRKAGIDIPTLCYHSELSIYGACRLCTVENERGKTFASCSEKPRDGMVIYTNTPRLMHYRKLILELLLAAHCRDCTTCIKSGECHLQELAHRLGVHEVRFENVREMQPIDNSSPAIIRDPNKCILCGDCVRMCDNIQNINAIDFAYRGTDALVTPAFNKKIAETNCVGCGQCRVVCPTGAISIHTNIDLVWEALADKNTKVIAQIAPAVRVAVGDQFGYAKGENVMGKLVGVLHRLGFDEVYDTSYGADLTVIEESKEFIERFTAGEKLPLFTSCCPAWVKHCETKYPELAENLSTCRSPQQMFGAVVREYYKDPEKNEGKRLVSVSIMPCTAKKEEILRPESMTNGKQDVDYVLTTTEIIRMIKKSGIVFDKVEIE…	[FeFe] Group A3	[FeFe] Group A3	Bifurcating	Labile	3	[FeFe]-centre, 3 x [4Fe4S] clusters, 1 x [2Fe2S] cluster	NADH dehydrogenase, thioredoxin	0.428273	0.792366	0	0	1.03069	0.826529	0	0.712424	0.739501	0.995132	2.08728	0	0	0.932283
WP_028109440.1	MTATTYQAGEIQGLIEIDASKCKGCDACKKFCPTQAIVGASGAAHSIDKDRCLSCGQCMINCPFGAIKETHSALDTVIRKLADKDTTVVGIIAPAVRVAIGEEFGLGTGELVTGKLYGAMNKAGFKIFDCNFAADLTIMEEGSEFIHRLHATVKGEEHAGALPQFTSCCPAWVRYLEGNFPSLLPNLSTAKSPQQMAGTVAKTYGAKVYDMEPEKIFTIAVMPCTAKKVEASRPEFNSAWHYNHEHGAHAAEYPDVDAVLTTREMAQLLKLLKIDLATTPAYEGDSLFAQYTGAGTIFGTTGGVMEAALRTAHKVLTDTEMAKLDLEPVRGLEGVKEADVTLFDKQLGQEVTVKVAVVHDMGNNIEPILRDVAAGTSPYHFIEVMNCAGGCVNGGGQPV…	[FeFe] Group A1	[FeFe] Group A1	Evolving	Labile	3	[FeFe]-centre, 2 x [4Fe4S] clusters	Small subunit, cytochrome b	0.171781	0	0	0	1.03069	0	0	0	0	0	0	0	0	0
WP_028241974.1	MGKRSIVPYGPQHPVLPEPIHLDLVLEDEKVLAAIPSIGFIHRGLESLTSKKDFNEMVYVAERICGICSFMHGMGYCMAVEDIMNVEVPRRADYLRTIWAEMSRLHSHLLWLGLLADGFGFESLFMHSWRLRENILDMFEASTGGRVIFSVNTIGGVLKDMPNDMLKEFVKKLDDMEKEIRETTSIFLNDYTVKSRLVGVGILTGEDAIRRGAVGPMMRASGINVDMRKNGYAAYNDIDFDVITSNNCDSYARCEVRIGEIFQSIDIIRQCVAKIPDTEINTKVTGMPNGESIIRVEQPRGEAFYHVRANGTKFLDRFRVRTPTFANIPALTQTLQGCQYGDVPLLVLTIDPCISCTER	[NiFe] Group 4e	[NiFe] Group 4e	Evolving	Sensitive	6	[NiFe]-centre, 1 x [4Fe4S] clusters	NuoL, NuoH, NuoC, [FeS] protein	0.26963	0.204329	0	0	0	0	1.61778	0	0	0	0	0	1.22598	0
WP_028263961.1	MSNTMRGVYTNLTEIRRNVFREVAAVAYGNAKDETTRLEELPYKIIPGEIATYRESVFLERAIVAERIRLALGLPLQGVDKPAPLTDGIEDALKPETYYEPPLINIIKFACNACADNVYRVTDGCQGCLAHPCREICPKGAISFVDKKAYIDQEKCIKCGRCFDVCPYHAIAHQERPCAAACGMHAISSDKNGHADIDYNKCVSCGQCLVNCPFGAIADKSQIFQVIQAMHYGEEVIAAVAPSFVGQFGGKGNVGKLREAFKQLGFGGVEEVALGADLCSVEEAHMFLEEVPQKQAFMATSCCPAWSVMAKKEFPEHADKVSMALTPMTLTARMIRREHPHAKIVFVGPCSAKKLEAMRKSVRSEVDFVLTFEELAGMMEAKHIDYSSLADDNKSDFNV…	[FeFe] Group B	[FeFe] Group B	Evolving	Labile	1	[FeFe]-centre, 2 x [4Fe4S] clusters	None	0.134815	0.321236	0	0	0	0	0.808891	0	0	0.995132	0	0	0	0.932283
WP_028264340.1	MVTLTIDNIQVTVPEQTSILDAARMAGIYIPTLCYLKDLNEIGACRVCIVEIEGIDQLVASCNNYVLDGMVVHTNSKKVREARRMNVELLLSTHNSSCTSCVRSRNCSLQNVSNDLGIYYQDFPNTHVPFTPWNKDYPLIRDNSKCIGCYRCIQVCDKVQNSHVWSMTSRTHHAVVDVVGGKDFSEADCTLCGQCVVNCPTGALRERDDTERVWDALSDPDTCCVVQIAPSIRTAWGEEFGIEPADANLSQLVAALRKLGFDYVINTDFSADLTIMEESAELLEHLPQSQNGGLPLFTSCCPGWMRYAKAHYPQLVDYISTCKSPQQMMGAVVKSYFAQQIGVEPSSVFSVSVMPCIAKKSEAKIPDMCNADELRDVDVVLTTRELVRMIRANHIAVHD…	[FeFe] Group A2	[FeFe] Group A2	Evolving	Labile	2	[FeFe]-centre, 3 x [4Fe4S] clusters, 1 x [2Fe2S] cluster	NADH-dependent glutamate synthase	0.134815	0.204329	0	0	0	0	0.808891	0	0	0	0	0	1.22598	0
WP_028308066.1	MELVSLKIDNRLVEVHPGATILEAAEIAGVNIPTLCYMKDINKVGACRICVVEVVGARTLAAACVVPVAQGMEVLTNTEKVRNARKFNLELLLSDHDVECLTCIRNQNCELQKMAELLGVRDMRFVGKRNLSAKDMSTPALIRDPQKCILCRRCVSVCKQVQSVEAIVPLGRGFKTLIGTQFNEALSYSVCVQCGQCVLVCPTGALVEKENTEEVWKALSDPRKHVVVQTAPATRVSIGQEFGLEPGTVSTGQMVAALKLIGFDKVMDTDFTADLTIMEEGSELIERLTNNGTLPMITSCSPGWIKFIEHFYPELTEHLSTCKSPQQMFGALLKTYYAEKVKIDPADIVSVSIMPCTAKKFEADRPEMTDSGYTDVDYVLTTRELARMFKQAGIQLNKL…	[FeFe] Group A3	[FeFe] Group A3	Bifurcating	Labile	3	[FeFe]-centre, 3 x [4Fe4S] clusters, 1 x [2Fe2S] cluster	NADH dehydrogenase, thioredoxin	0	0.165855	0	0	0	0	0	0	0	0.995132	0	0	0	0
WP_028485709.1	MINITVNGRPVKVKEGTTLLEAAREVGVHIPTLCFYPRLPSHAVCRLCLVDVKGVNRPQPACKTQAKDGDIVTTDSKKLIEFRKTDAQWLLARHPNDCIRCEVNGTCQFQNFIHEYQLEDCWPKMPRGSEEHPEHALTDHTSPSIWRDLSKCIECGLCVEACGDAGQQQHIIGFAEHSSARLPVTVFDQSLADTHCISCGQCTLVCPVGALIETPHWHQVLHTLDAHRRVSAVQVAPATRVAISEEFGMKPGTISTGRMVNALRQLGFDYVFDTNFAADLTIMEEGTEFLSRLEEQRHLPLFTSCCPGWINWVELNRPDLLPHLSTTKSPQQMHGALTKRGAFAASLGPDFAAGKIEPYVVSIMPCTAKKDESARPGGAGDIDHVLTTRELARMIKARN…	[FeFe] Group A1	[FeFe] Group A1	Evolving	Labile	1	[FeFe]-centre, 3 x [4Fe4S] clusters, 1 x [2Fe2S] cluster	None	0	0.310761	0	0	0	0	0	0	0	0	0	0	0	1.86457
WP_028517519.1	MSELIIVKPEKCVGCNACVRECPAPEANMTKQLEDGRFITMVNPHKCIACGECVKKCNHGARDYIDDTEECIAELAKEKIIIMASPAIKTVLPTKWKGVLDWFKKQGCTIFDVSYGADICTWVHMRTLEQDKIGNIITQQCPAVVKYVETYQPKLLQNLSPIHSPIACSAIYIKKYLRRNNPIAVITPCIAEKNEAVDTGLINYTITIKKLLEYFDRNDINIDIDTSEDFEYKFDESQGQMGAIYSRPGGLRDNMWLHDPDMNITNSEGVHKVFAEIDMYGRMPESKHPRIFDVLSCEFGCNIGPAAGTKQTVFDAMATMRSIENEAKSRRKSTGLMGRGDDRLFKKFDDELRVSDFLRNYKPSMPTPMPSNMQLDPIFEKMGMHTDEDRKYDCHACGY…	[FeFe] Group C	[FeFe] Group C2	Sensory	Labile	1	[FeFe]-centre, 2 x [4Fe4S] clusters, PAS domain	Fusion with methyl-accepting chemotaxis protein	0	0.12325	0	0	0	0	0	0	0.739501	0	0	0	0	0
WP_028533896.1	MKAQINGKEYSFESSDTILKLARRNGIYIPTLCELHDTGHAPGTCRVCMVEVRTEGAEAAYVTACDTPLQDGARIYTRTPKVQELRRMQLDLMMGDHNQDCASCSRHGACELIDVADAVGLKKSSISIQPLQTAPCEAADSAVVYDQSRCIRCMRCVSICRDTQGVDALEVSGRGVNSAIVIKDGKTRNESDCVSCGQCVMVCPTGALSERDQTQEVIDYLADPKIVTVFQIAPSIRVGFGEEFGLEPGGNVEGKVVAALRAIGADVILDTNFAADVVIMEEGTEVLGRVTRSEGTTFTSCCPGWVDFAEKNFPQILPMLSSTRSPQQVLGSLAKTYLPNKMDIDPARIRVVSIMPCTAKKNEAARPELGKDGIPDVDIVLTIREFARLLRREGVDLRE…	[FeFe] Group A2	[FeFe] Group A2	Evolving	Labile	2	[FeFe]-centre, 3 x [4Fe4S] clusters, 1 x [2Fe2S] cluster	NADH-dependent glutamate synthase	0	0.204329	0	0	0	0	0	0	0	0	0	0	1.22598	0
WP_028717753.1	MTINTPNGFTLDTSGRRIVVDPVTRIEGHMRCEVNVDDQGVIRNAVSTGTMWRGLEVIVKGRDPRDAWAFVERICGVCTGTHALTSVRAVEDALGIQIPDNANSIRNMMQLNLQIHDHVVHFYHLHALDWVNPVNALRADPKATSELQQMVSPSHPLSSPGYFRDVQNRLKRFVESGQLGLFKNGYWDNPAYKLPPEADLMATTHYLEALDLQKEIVKVHTIFGGKNPHPNWLVGGVPCPINIDGTGSVGAINMERLNVVSSIIDLCNEFNRNVYIPDVIAIGGFYRNWLYGGGLSSQSVLAYGDIPEHPNNFEADQLHLPRGAIINGNLDEVHDVDPRDPEQIQEFVDHSWYTYGEPGKGLHPWDGETSPKFELGPNFKGTKTNIEQLDESAKYSWIK…	[NiFe] Group 1d	[NiFe] Group 1d	Aerobic Uptake	Tolerant	3	[NiFe]-centre, 1 x [4Fe3S] cluster, 1 x [3Fe4S] cluster, 1 x [4Fe4S] cluster	Cytochrome b	0	0.370185	0	0	0	0	0	0	0	0.995132	0	0	1.22598	0
WP_028728436.1	MSERIVIDPITRIEGHLRVEAVIEGGKIKDAYSSGTMVRGIENIVRDRDPRDAWVFVGRVCGVCTSIHSLCSVRAVEHALDITIPPNAEMVRNIMEAVLYMHDHTVHFYQLHALDWVDIVSGLKADPQKAALLAQQLSPWAKNTEGYFKATQDRLKKFVASGQLGIFSNGYWGHPAYKLTPEQNLIATVHYLEALEWQKEIVKVHAVFGGKNPHPNFLVGGMPCSIDLNEANSINAERLALVKQKLQEGKDFIDQVYIPDLLMIAGVYKDEWSKIGGGVSNYLSYGDFPLHGYAGIEDFMSPRGIVLDRDLSKVHPVDANSPDEIKEYIYHSWYKYTEGDKAGLHPYDGETNLEYTGPKPPYKHLDVEDKYSWIKTPRWKEKPMEVGPLARLVVAYAAG…	[NiFe] Group 1d	[NiFe] Group 1d	Aerobic Uptake	Tolerant	3	[NiFe]-centre, 1 x [4Fe3S] cluster, 1 x [3Fe4S] cluster, 1 x [4Fe4S] cluster	Cytochrome b	0	0.165855	0	0	0	0	0	0	0	0.995132	0	0	0	0
WP_028729360.1	MENIKLTIDNREVEVPKGMTVLDAARSMGIRIPTLCHMKLEDLHYENNPGACRICVVEIEGRRNLAPSCKTECTEGMVVRTHTPRVMNARKTVMELILSNHPAGCLTCSSNGYCELQTIAHDLGIREIRYQGEQSTFEIDRSPSIVRNMNKCIMCRRCETMCNSIQTVGALTAVNRGFNAAVSTAFERDIAGSTCSYCGQCVSVCPVNALSGRNTQQPVLDALADPTKIVIAQTAPAVRTALGRDFGCEPGTLVTGKMVSALRQLGFDYVFDTDFAADLTIMEEGTELLQRLSKYLSGDEEVKIPMMTSCCPGWVSFVEQHFPELRDNLSTAKSPQQMFGAIAKSYFAEKLGVDRKDIIVVSIMPCLAKKYEACRPEFAEDGNPDVDISIYTRELARLI…	[FeFe] Group A3	[FeFe] Group A3	Bifurcating	Labile	3	[FeFe]-centre, 3 x [4Fe4S] clusters, 1 x [2Fe2S] cluster	NADH dehydrogenase, thioredoxin	0.476595	0	0	1.11646	1.03069	0	0	0.712424	0	0	0	0	0	0
WP_028828670.1	MSTVNVKINNISYQFPKGLTILQACNQINIEVPTLCYLKEINEIGACRICVVEVKGAKNLVASCVHPLSEGMDILTHSEKVLKARKITLELILSTHDRSCLSCIRSDNCELQKLCHDFKVDDEAKYDGHNQVYKTDDSAIHMYRDDNKCILCRRCVAACSKLQSVGVIGVNERGFKTHIGCAFEEDLGKTDCVSCGQCIVVCPTGAIAEKDDTDKVWAALADESKHVIVATAPSIRVTLGEAFGMPVGTNVKGKMVTALKHLGFAGVYDTDIAADLTIIEESQELITRIQNGGPLPLITSCSPGWIKFCEHNFHDFIPNLSSCKSPQQMFGAVVKTWYAEKNNLDPHDIVVVSVMPCTAKKFEARRDNQSAAGVYDIDIAITTRELARMIKRAGIQFKK…	[FeFe] Group A3	[FeFe] Group A3	Bifurcating	Labile	3	[FeFe]-centre, 3 x [4Fe4S] clusters, 1 x [2Fe2S] cluster	NADH dehydrogenase, thioredoxin	0.428273	0.204329	0	0	1.03069	0.826529	0	0.712424	0	0	0	0	1.22598	0
WP_028828747.1	MKGDSMSYINLNPGSCQACYRCIRECPVKSIQFKDDNATIIENECILCGKCIEVCPHQAKFIQSELYNVQALIASGKKVIASVAPSYKAWSETSFEHLREQLLDLGFADAQETVIGASMVNHDYIRLMKEGSMPVIITSACPSVVMLIERHYPSLIGLIAPTLSPMMAHAKLIRRTQEDPHVVFIGPCISKKYEPSDILLSGYIDNVLTFDEIDSWLGAETASEPGKMKSQSDNKDSGSPLVNGLMDTSVRLYPRSRGVIDSLEAIEPFDGYLSIAIDGARDCIDMFSYLDECIRSGNMAEDKLFIEANICKGACMNGPIFKIAKKRTVFASSRLSKKAEPHDMLARDMLARDIDDIYDISLERQYLNRKPAVKEPTTDEITAILAQMGKHRPEDELNC…	[FeFe] Group C	[FeFe] Group C3	Sensory	Labile	2	[FeFe]-centre, 2 x [4Fe4S] clusters, PAS domain	Fusion with transcriptional activator	0.118737	0	0	0	0	0	0	0.712424	0	0	0	0	0	0
WP_028828847.1	MSKAMIIDGMRVPYTDEKNILAVIRNAGIDLPTFCYHSELSIYGACRMCSVEDQRGNIIASCSERPKDGMVVSTNTRRVQKYRKTILELLLSNHDKDCTSCEITGKCQLQSLALRYGVKKSRFENNFQEKEIDNSSPSIVRNPNKCIKCGDCVMVCEDVQGVGALGFAHRGSEVEITPAFGRKLAESNCVNCGQCRIVCPTGAITIKNDTQRVWDAIFDDNTKVVAQIAPAVRVALGEEFGLPAGTMTLGKMVAAMRKMGVEQIFDTAIAADLTVREESGEFLSKFTKGQGLPLFTSCCPAWVKFVENKYPEFVQNLSTARSPQQIFGSVYKEIENANRENEDKRKPFLISVMPCTAKKEEITRPEFTKNGVPDVDVVITTQELAIMIKEMGVNFADLE…	[FeFe] Group A3	[FeFe] Group A3	Bifurcating	Labile	3	[FeFe]-centre, 3 x [4Fe4S] clusters, 1 x [2Fe2S] cluster	NADH dehydrogenase, thioredoxin	0.256492	0	0	0	0	0.826529	0	0.712424	0	0	0	0	0	0
WP_028830146.1	MKGIFSDIINYRRKVFAEVADFAYGDKDLSELPKSVFNIIPGEEARFRTDVFKERAIVGERIRLAMGLDIRDAATFGLISDGIENVDVDKRIYEPPLVNVITFACEACPTKTYEVTSNCRRCIGHPCQNVCPVNAITINKKQAVIDKEKCIKCGKCKDICPYGAIIKYDRPCAEACGVNAIESDSLGRAKINYDKCVSCGQCMQACPFAAIGDKSQIYQLVKAIRNQENMYAIVAPAFVGQFGPIANPTQIFEAIKRLGFKEVLEVGIGADIGTIHEAEEFLDEVPNKVPYMGTSCCPAWLSMVQKMFPDQARYISDTSTPMIATAQFIKKNNEDAKVVFIGPCIAKKLEALGEKVHKYVDFVITFEELMGLFVSRGIEVSEIEVDYKIQDASKLGRGF…	[FeFe] Group B	[FeFe] Group B	Evolving	Labile	1	[FeFe]-centre, 2 x [4Fe4S] clusters	None	0	0.15538	0	0	0	0	0	0	0	0	0	0	0	0.932283
WP_028972813.1	MINVKINGTPVQVESGTSILNAAKAAGVKIPTLCAHPDLPPNASCGICVVKQEGSPKMVRACAAACTEGVNYITHDPEIVEVRKSVVELILANHPNDCLTCGRSGNCELQKISADFGIREIPFSRGTKKLPRDTSTPSIVLNPEKCIGCGRCVTVCQQLQDVWALEFLDRGDETKMAPAAGVLLNDSPCIKCGQCSAHCPVGAIFERDQTQDLWDAIRDPAKHVAVQVAPAVRVAIGEAFGLEPGVISTGKLYAALRRLGVDAVFDTNFAADLTIMEEGTEFVERFTKGGILPQITSCCPSWVDYMEKYYSDMIPNFSTAKSPMMMQGAMTKTYYAEVGKLDPANIYSVAIMPCTSKKYEIDRDDAMRSSGYADMDLSITTRELSRMIKQAGIDFNSLP…	[FeFe] Group A3	[FeFe] Group A3	Bifurcating	Labile	4	[FeFe]-centre, 3 x [4Fe4S] clusters, 1 x [2Fe2S] cluster	NADH dehydrogenase, thioredoxin, thioredoxin	0	0.12325	0	0	0	0	0	0	0.739501	0	0	0	0	0
WP_029502581.1	MNVIGFKEAKCKNCYKCVRNCDVKAITVKDAQAYIMNDKCILCGHCLEVCPQNAKTLISDLERVKEYIKEGHQTIISLAPAYLGVLKYNTPGQVISALLKLGFTAVRETAEGAAYVTREYDKLIAAGEMENIITTCCPSLNDLVEIYYPSLTKYLAPVISPMIAHGKIIREEYGPNVKVVFLGPCISKKREAESDPRTVGIIDAVINFKELEEWLLEEGIDILEQPDTPPSNPNPLVNRLYPISSGVLSSVVASRNTSDRYRKFYVHGIKNCIDLLESMNRGEVTGCFIEANICNGGCIKGPAIDRARISRFKVKLDMEESIPKTPIKDEDFYAKFPILLEKHFFDRSPKDPVPTEEEIMQILRKIGKTKTEDMLNCGACGYATCRDKAIAVYQGKAEL…	[FeFe] Group C	[FeFe] Group C3	Sensory	Labile	3	[FeFe]-centre, 2 x [4Fe4S] clusters, PAS domain	Phosphatase, thioredoxin	0.957784	0	1.18357	2.23292	0	0	1.61778	0.712424	0	0	0	0	0	0
WP_029502583.1	MLQTDNDIGTIKHEVLFEVAKLAFHKELAEKEDVLPFEMIPGPQANFRCCIYKEREIIRQRIRLAQGKSPSLSQDNSNIVQVISSACEECPITRFLVTDNCQKCMGKRCQKACNFQAISMSHDRAHIDPAKCKECGKCAQACPYNAIADLKRPCKKSCPVDAISMDENNIVVIDEEKCINCGQCIKNCPFGAISDRSFMVDVINLLNSEKEVYAMIAPAIEGQFGATASTGVITEALKQLGFTGVYEVALGADLVAASEAEEWAEAYKEGKKKTTSCCPAFVKMIKKHYPSLVDHISSTISPMQATAKYVKAIHKDAITVFIGPCIAKKGEVLDHIAEGGTDYALTFDELYAMLRAKEINLATIGENIQHGSIYAKNFAVAGGVTASVVEALKEKGIDA…	[FeFe] Group B	[FeFe] Group B	Evolving	Labile	1	[FeFe]-centre, 3 x [4Fe4S] clusters, 1 x [2Fe2S] cluster	None	1.17557	0.574514	0	1.11646	1.03069	2.47959	2.42667	0	0	0.995132	0	0	2.45195	0
WP_029688128.1	MSEKSTIPFGPQHPVLPEPIHLKLVVEDEKVVEAYPAFGFVHRGLELLVKKKDFNQMVYVVDHICGICSAMHGQSYCQAVEELIGVEVPERAKYLRVIWAEIHRIHSHLLWFGLLADAFGFENLFMLSWRIREKIMDILEATAGNRVIISVNIVGGVRRDIDNEQAKWVLNELKEVEESLKELDKIVRNNYTIKQRTVGVGVLSKDEAYKLGAVGPTLRGSGVPIDMRTTGYAAYKDLDFEPIVEKDGDTYARTIVRVKEMFQSIDLVRQAISKLPEGELNVKVKPNLPAGEVISRVEQPRGEVFYYIKSTGGKYLDRLRVRTPTFANLASLLHMLPGSSLADVPVLVLTIDPCISCTER	[NiFe] Group 4e	[NiFe] Group 4e	Evolving	Sensitive	6	[NiFe]-centre, 1 x [4Fe4S] clusters	NuoL, NuoH, NuoC, [FeS] protein	0.134815	0	0	0	0	0	0.808891	0	0	0	0	0	0	0
WP_032508759.1	MFEFETQLKRLKHEVLTAVARLSIEENLTKENIEKIPYEIIKGEKARYRCCVYKEREVVLERAQLALSLTPNSKYGDINPDSVSLDTDEQIIYIVEAACDRCPINEFTVTELCRGCLAHRCKEACKFGAISYINGRAYINHDLCKACGMCKSSCQYDAISEVVRPCKSVCPTGALDFNRNTMKAMIHEDNCINCGACMSACPFGAISDKSLIAPVAKKLAKKENMYAIVAPAITGQIDSNITYGQLKNAIKSLGFVDMIEASCGADAVTVHEXXXXGADAVTVHESNELIERIKSGDNYMTNSCCPGFFKYIEKMFPDEKDRISSTVSPMVATGRLVKKIDSDAKVVFIGPCTAKKSEATEKSLKDSVDYVLTFEELMALFEAFNIDLSKCSNEDINDG…	[FeFe] Group B	[FeFe] Group B	Evolving	Labile	1	[FeFe]-centre, 3 x [4Fe4S] clusters, 1 x [2Fe2S] cluster	None	1.03955	0.434011	0	3.34938	2.06137	0.826529	0	0	0.739501	0	0	0	0	1.86457
