# Supplementary material for: Reshaping of bacterial molecular hydrogen metabolism contributes to the outgrowth of commensal E. coli during gut inflammation
Source: eLife. 2021 Jun 4;10:e58609. doi: 10.7554/eLife.58609 (PMC8177889; doi:10.7554/eLife.58609)
Supplement: Figure 1—source data 2. [file elife-58609-fig1-data2.xlsx]

## Sheet: Figure 6-Source Data 2
Figure 6-Source Data 2. Mapping of metagenomic sequencing of non-IBD controls and patients with Crohn's disease to hydrogenases
NCBI Accession	Protein Sequence	Previous Class	New Class	Activity (predicted)	Oxygen-Tolerance (predicted)	Subunits (predicted)	Metal Centres (predicted)	Accessory Subunits (predicted)	average non-IBD control	average Crohn's disease	control1	control2	control3	control4	control5	control6	control7	control8	control9	control10	control11	control12	control13	control14	control15	control16	control17	control18	control19	control20	control21	control22	control23	control24	control25	control26	control27	control28	control29	control30	control31	control32	control33	control34	control35	control36	control37	control38	control39
WP_019262598.1	MDEKIPNSKIIETEIPMGTVHPAALEPYRVRLFVEDEIVQEAEITIGVNHRGVERIMEGLPVEKANALTEKICGICSNAHVWNSVRTAELGLDIEIPERASYIRIIVGELERLHSHFLYLAHGCEVLAHETFSMRVFYLREIVMELLNMIGGNRVQYGCSVIGGVRPRCELDSKRLERLANDMNALEEGLTDFVNRFTSDSILMSRITGIGVLPQKQAIKLDVSGPSLRATGVVYDLRTTMSEYDPFDFNIITQEDGDVKSNLMMRALESFESIKIIRQAVKNLPEGPVVTHDWEMKDTDIIESRIEVPRGTLYHSYALESGRVRHSIIRTPSMANIGAMQYACIGDQITDAQLCIVQCDPCFTCTDRAIEIIRR	[NiFe] Group 4d	[NiFe] Group 4i	Evolving	Sensitive	16	[NiFe]-centre, 1 x [4Fe4S] clusters	NuoH, NuoL, polyferredoxin, nine TM proteins, two hypotheticals	15.4609	0.731142	0	19.375	15.5439	0	0	0	10.1134	68.9339	0	0	0	0	68.7996	0	0	0	0	0	0	0	0	0	30.4056	39.2279	16.0735	17.5662	61.5027	0	0	0	31.9972	0	0	0	0	225.36	0	153.201	0
WP_019262624.1	MKDRIVISPTSRQEGHAELVMEVDDEGIVTKGRYLSITPVRGLEKMVAGKNPETAPVLCQRICGVCPIPHTLASVEAIDHSLDIEVPKAGKLLRQATLAAHGVNSAAIHHFLIAPDFVPEEDFTTAVKSVSAVRKNVQYVVDMLAGEGIHPSDIRVGGMARNITSATKDKLIDRLKAFKPDMEKHVELMKSFIAARELPEGLGIVDAPLLASSASYGNLDEFDYDNFSEVLPEAWYDDPEIGKKACTTIPLINGKNVETGPRARMDKFNGFKDKGVVAQHVARAEEMLNNYNLTIDLLEQIDTSAPARADYDDRGTGKLGIGVIEGPRGTNVHMANVKDSKIQFYSAIVPTTWNIPTMGPATEGFHHKYGADVIRAYDPCLSCATHVMVVDDEDKSILK…	[NiFe] Group 3a	[NiFe] Group 3a	Anaerobic Uptake	Sensitive	3	[NiFe]-centre, 3 x [4Fe4S] clusters	F420 reductase	16.5982	0.763752	0	22.475	42.3926	0	0	0	13.791	58.8236	0	0	0	0	88.6055	0	0	0	0	0	0	0	0	0	43.3653	42.9895	16.7724	21.2643	79.2366	0	0	0.462051	16.7985	0	0	0	0.867433	212.969	0	148.855	0
WP_019266264.1	MILPIGPIHPYLKEPIRLKLQTEGEKVVKAEIEYGYVHRGIEKIIEGKTWQKGIYLAERVCGICSYEHTQSFAETIERISGVYAPLRAQFLRVITNELDRIQSHLLGNSTFFKSIDHETLYMQSLDIREYAMDAIELLTGNRVNMGWNVVGGVKMDADERHFKPILDNLKIIEERIPRLREIYAEGPAIGMRSRNVGVMTKKEAIKGKAVGPIGRGSGLKYDLRQDHYTYKDHFDFKTIWRKEGDNYARTLNRIDEIPECISLIRQAIENIPEGDIRIPVDIKSGYGEWKNEAPRGEVSYMIETNGNLIKHISIRTPSISNMDSCAKYMIKDVATVADAVATYASSDPCVACAERVAVTDKQGNTTTKNIFEVR	[NiFe] Group 4d	[NiFe] Group 4h	Evolving	Sensitive	20	[NiFe]-centre, 1 x [4Fe4S] clusters	NuoH, NuoL, Two polyferredoxins, eleven TM proteins, three hypotheticals	14.4813	0.667666	0	17.825	45.2187	0	0	0	10.1134	89.1545	0	0	0.686718	0	46.3876	0	0	0	0	0	0	0	0	0	32.3994	24.7189	30.0505	19.4152	58.4842	0	0.171133	0	15.9986	0	0	0	0	189.736	0	128.754	0
WP_019263574.1	MKVAILGAGCYRTHAASGITNFTRACEVAEETGKEKFAMTHSTIEMGAELLHLAGVDEVVVSDPVFDNDFTVVDDFDFQEVIAAHKAGKAEDVMPDIRAKVNELAESLPTPPKAAIHFVDPEDLGMKTMNDDAAAVADADWVMTWLPEGGMQKPIIEKFAGELKEGAILTHACTIPTTEFKNIFDECGANVNVASYHPGAVPEMKGQAYIGEGYADEASIKTLLELGEKARGSAFTLPANLLGPVCDMCSAVTAITYAGILAYRDTVTQILGAPAGFAQMMANEALTQVTALMQDEGIDKMDEALNPGALLGTADSMNFGPLAEIVPTVLENLEKRS	Hmd	[Fe]	Bidirectional	Tolerant	1	Fe ion	None	13.0779	0.675446	0	17.05	38.1533	0	0	0	5.51642	76.2868	0	0	0	0	55.2482	0	0	0	0	0	0	0	0	0	27.6641	27.4058	13.977	18.4907	47.9193	0.492503	0	0	9.59917	0	1.05872	0	0	178.894	0	110.826	0
WP_022363091.1	MAKAQVIPFGPQHPVLPEPVHLDLVVEDETVVDVLPQIGFIHRGLEKLVETRDIHQYIYVAERICGICAFGHSYGYAQTVERLMNVEIPPRAEYLRAIMHELSRIHSHLLWMGLAADAFGFESLFMHSWRLRERILDIFEAVAGGRVILSYTLIGGVTKDIDAPMLQAIKDKLASIKDEYKQICNAFLKDTSVKNRLVGVGYIAPEDAFGYGMVGPFARASNLNNDVRCLGIGAYGDLAEFKPILSTDGDCYARVQVRAEEVLQSIDIINELIDKIPGGDFYVPVKGAPAAGSEACNILEQPRGEVYYYCSGNGTKNLERMRIRTPTTQNIAGMTVALKGCDLADVNMIVLTIDPCISCTER	[NiFe] Group 4e	[NiFe] Group 4e	Evolving	Sensitive	6	[NiFe]-centre, 1 x [4Fe4S] clusters	NuoL, NuoH, NuoC, [FeS] protein	5.7307	0.467301	0	0	4.23926	51.4989	9.59312	2.19144	0.459702	0.919119	10.2659	4.87794	0.686718	0	0	0	8.99305	5.99083	0	0	0.908327	2.22914	1.432	1.78261	1.99381	3.76158	0	1.84907	4.15049	19.7001	0	20.3302	0	0	0	4.75994	5.63831	9.29319	12.91	1.6298	38.5899
WP_022370065.1	MTRSIIDPVTRIEGHLRVEMEVEGGVVTDAWVSGGCFRGMELVVENRTPEDAAHIVQRICGVCPVSHAHASAIAAEKAYGITIPNNARIIRNLIEGGQFLHSHILWFYTLAALDYVNPINALNANVGDALDLVEAAGTSCQSDLKALKEKLQTFANNGQLSIFSGGWFLDPEVAKEFTLGAELDLICTAHYIEALTMQSKASEICALLGGKMPHVMTLVPGGTSFVPTEEKLDDLWSLVREVRDWVKATMIPDTKAIAPAYKAALDFGKGCGRYIAWGVFEDPSFEMSKRYLPSGVIDENLKLSEVNEDLIKEYVGHSWYVGDSDLNPREGVTEPEYTEYYKGDTDVISDRYTWSKAPSYDGKPMEAGPFSRVLAAYLRGNKFVKTTLDGLMADLGLSL…	[NiFe] Group 1a	[NiFe] Group 1i	Anaerobic Uptake	Sensitive	3	[NiFe]-centre, 3 x [4Fe4S] clusters	Cytochrome b	2.38163	0.110639	0	0	1.41309	0	1.43897	5.4786	0	3.67647	0	37.3976	2.06015	0	0.521209	2.6909	0	0	0	0	0	14.4894	2.864	1.78261	0	1.07474	0	0	0.754635	0	0.171133	0	0	0	0	0	35.9985	3.09773	0.430335	1.6298	2.57266
WP_022363273.1	MTRSIIDPITRIEGHLRVEMEVDNGVVTDAWVSGGCFRGMELVVQDRTPEDAAQIVQRICGVCPVSHTHASSLAGEAAYGIVIPNQARIIRNLVEGGQFLHSHILWLYTLAALDYVNPLNALNANVGKAYDLMEAAGTSCSTDLKTLMGTLTKFANNGQLSIFSGGWFLDGQAPEAYKLDPEADLICTAHYLEALNMQAKASEICGLIGGKMPHIMTLVPGGTAFVPTEEKLDELYSITREIRDWVDSTMLPDTKIIASAYPEALGFGRGCGRYVAWGVFQRENFEMADRYMPSGVVYTNDGLRLEDPDPAAIKEYVGHSWYVGDSNLNPKEGVTDPLYTEYYVAGTEHEENGHMIGTVNDRYTWSKGPSYNGECMEAGPFSRVLAAYLRGGEKNRYIV…	[NiFe] Group 1a	[NiFe] Group 1i	Anaerobic Uptake	Sensitive	3	[NiFe]-centre, 3 x [4Fe4S] clusters	Cytochrome b	8.42697	0.839775	0	0	9.8916	85.0651	10.5524	4.38288	0.459702	0	5.47514	11.3819	0	0	0.521209	0	14.9884	8.29499	0	0	1.36249	3.46756	0	0	3.73839	8.06053	0	5.54721	6.79171	30.0427	0	24.0266	1.59986	0	0	5.94992	0	23.233	9.8977	0	48.2374
WP_022363293.1	MTRSQLNIDHVARVEGHGNVHVVIEDDVVKTVEMNIVEPARLFESMVRGQSYKDCSYISSRICGICSPSHCVTDLKAVEDAFGIEVSSRTKMLRELLVYGSYLQNHASHLFVFVVPDFVGEESVFPLAQSDPELFNQALDLKKLGNDLCTLVGGRSIHPITAVVGGFTHEISAQEYLELADRLEAAIPFAKATVDLFSSFRITEIHTASDLLAMVEDDYYPVQSSNTLELIDEHVRFDAHDFESYLEEYEVPHSGALFTRVKATGKPVFTSALSRLNASWDHLSQEAKFASAKAGLRPEEKNPMKNNLAQAIEILDALIRCAGICRELAKGEGDSKPVPFEVRAGTGVGMSEAPRGVVFHKLEFDDEGRVLHASIITPTSQNLASLEADTRHLVEVLVE…	[NiFe] Group 3b	[NiFe] Group 3b	Bidirectional	Tolerant	4	[NiFe]-centre, 3 x [4Fe4S] clusters	Diaphorase, [FeS] protein	7.10611	0.715266	0	0.774999	2.82617	56.097	8.63381	5.4786	0.459702	0.919119	10.2659	1.62598	0	0	0.521209	0	14.9884	4.60833	0	0	0.454164	0.619207	0	1.78261	2.74149	6.98579	0	2.77361	2.2639	30.0427	0	24.0266	0	0	0	8.92488	0	10.0676	8.17636	0	55.3122
WP_015359537.1	MECLTLKKSNCKNCYKCIRHCPVKSIRFSGNQAYIIGDECIMCGQCFVVCPQNAKQIVDETEKVKVLLQSGAPVVVSLAPSFVANYEVGIEAMREAIKKLGFYDVEETAIGATIVKREYERLVKDEERDIIITSCCHSVNLLIQKHFPRCLPYLADIMSPMQVHCKDIKKRIPNAKTVFIGPCVAKKDEAQQYKGIVDAVLTFDELTAWLKAENITLEKKTDSNENSRARFFPTTGGILKTMDKKNPKYVYMAIDGAENCIAALRDIEKGNLHHCFIEMSACAGSCIGGPVMEKHHRSPVRDFAVISRYAGKKDFLVEQPSRAEIRKDFEIIEQRLREPTEEEILDTLRQMGKMKPSDELNCGSCGYNTCREKAIAICQGKAEISMCLPFLKEKAENFS…	[FeFe] Group C	[FeFe] Group C3	Sensory	Labile	3	[FeFe]-centre, 2 x [4Fe4S] clusters, PAS domain	Phosphatase, thioredoxin	18.0905	2.40909	1.54457	1.55	90.4375	5.51774	4.3169	9.86149	33.0985	111.213	16.4254	14.6338	17.1679	0	61.5027	0	2.99768	5.06916	0	0	0	19.0716	179	12.4783	77.0109	17.1958	4.19309	2.77361	15.47	16.2526	0.171133	6.46871	5.59951	0	0	1.78498	4.33716	17.8119	2.15167	82.5765	1.28633
WP_022363186.1	MVTLTIDDTSVTVEDGTTILDAAKAANISIPTLCYFKGLCDIGACRVCCVEVEGDERLSAACNTPATEGMVVHTRSDRAEAARKTNLELIRSRHDLDCRNCVRYGTCRLQYLLKSYGLAGPDAAPAIYPQELPRGKRAEWDPHAIIQRNASRCIQCGRCVAACKKLQGIGVWEFIGTGSRSSIGVADNRTMREAGCVACGQCITHCPVGALSERDDIARLRAAIADPEVTTVVQIAPATRTAWASSFGKQDGELGVERMCAVLKEMGVDYVFDTVFAADLTIMEEGTELLNIVKAGEIDRLPLFTSCCPGWVNFARTRYPESVAQHLSSAKSPMQMFGAVVKTWFAEKNGLAPEKIFSVALMPCTAKKVEVALPGMSSNPGAPDMDASLTTREFARMIA…	[FeFe] Group A2	[FeFe] Group A2	Evolving	Labile	2	[FeFe]-centre, 3 x [4Fe4S] clusters, 1 x [2Fe2S] cluster	NADH-dependent glutamate synthase	9.00203	1.12987	0.514858	0.774999	8.47851	91.5025	12.9507	2.19144	1.83881	0.919119	14.3722	1.62598	1.37344	0	3.12725	0	2.99768	5.99083	0	0	1.81665	0.743048	0	0	2.74149	8.06053	0.698849	7.39628	8.6783	24.1327	0.684533	40.1984	5.59951	0	0	14.2798	0	17.8119	9.8977	0	50.1668
WP_019262575.1	MVKLTMEPVTRIEGHAKITVQLDDDGNVVDTRLHVMEFRGFEKFLQGRPVEEVARIVPRICGICDVQHHLAAAKAVDQIFGFEDEKILPTAYKMREIMNWGSFMHSHALHFYFLAAPDLIIPDGTRKTRNVFQIIKDQPEIALQAIELRRNGLEIVRKIGGRPIHPTSSTPGGISTELDDETQKDLLQRAQRNVELAQATLDLAKPIFEEKIDLVNSLGYFGDTRHCGLVNDGVWDVYNGDVRIKDVDGSIYTEYKNLEYKDVVAEHVKPYSWLKFPYIKELGYPEGIYRVAPLSRINVADKMPDAAPLAQAAFEEFHDKFGYAQAPLLFHWARLIELLASAECAADALDQDLSGPKFPEELERTAGEGAGIVEAARGTLIHNYACDDNGLVTEANIVV…	[NiFe] Group 3c	[NiFe] Group 3c	Bifurcating	Sensitive	4	[NiFe]-centre, 3 x [4Fe4S] clusters	Polyferredoxin, [FeS] protein	1.47845	0	0	0	5.65234	0	0	0	2.75821	0	0	0	0	0	14.0726	0	0	0	0	0	0	0	0	0	7.47678	8.06053	0	0	12.8288	0	0	0	0.799931	0	0	0	0	23.233	0.430335	0	0
WP_021900186.1	MTRSVIDPITRIEGHLRVEMEVENGVVTDAWMSGGCFRGMELVVQDRTPEDAAHIVQRICGVCPVSHAHASSIAAEKAYGIEIPNNARIIRNLIEGGQFLHSHILWFYTLAALDYVNPLNALKANIADAYDLVEEAGTSCQSDLKALAQRLTKFAENGQMSIFSGNWWKNGAKDTEFKLPAELDLICTAHYIEALTMQSKASEICGLLGGKMPHVMTLVPGGTSFVPTEEKLDDLWSLVHEVRDWVAATMIPDTKAIAPYYLPALEFGKGCGRYVAWGVFERPSFEMADRYLPSGVIDENLNLSEVNEDLIKEYVGHSWYVGDSDLNPREGVTEPEFTEYYKEGTLFEENGHEFGEIAERYTWSKAPSYDGKCMEAGPFSRILAAYLRGNEFIKTTLDG…	[NiFe] Group 1a	[NiFe] Group 1i	Anaerobic Uptake	Sensitive	3	[NiFe]-centre, 3 x [4Fe4S] clusters	Cytochrome b	1.94264	0.0186887	0	0	0	0	0.479656	19.723	0	15.625	0	0	0	0	0.521209	0	0	0	0	0	0	0	0	0	0	0	0	0	0	0	0	0	0	0	0	0	0	30.2029	0.430335	0	9.64747
WP_027889016.1	MAHIVVDPVTRIEGHLRVEIEVQGNQVTDAISSGTAWRGLEVIAKNRDPRDLWAYIQRICGVCTSSHSLACVRAVEDALGIKIPKNANYIRNIMAATLTVHDHLVHFYHLHALDWVSPIEALKADPTATANLQNTVLANYKLPFAGPMDYDFSAYPKEFPKATPAYFQAVKDKVQALVSGGQLGIFAANWWDHPDYQILPPEVHLMAVAHYLNMLDKQREVVIPHVVFGGKNPHPHYVVGGMPCAISMDEMNAPINSQRLAAVDTAIRLGMDLVNNFYLPDLLAIGHICAQKGAGLDGGGLAKDRVLGFGAFPEEPFNGVANGNGEWFSQIMIRCNAVVENFGAGVMNAKVTDITSDDLKDPEVLTETTTHSWYKDGDALHPWDGKSEAEYTGDKNGNK…	[NiFe] Group 1d	[NiFe] Group 1d	Aerobic Uptake	Tolerant	3	[NiFe]-centre, 1 x [4Fe3S] cluster, 1 x [3Fe4S] cluster, 1 x [4Fe4S] cluster	Cytochrome b	6.12428	12.3665	0	0	70.6543	0	0	0	0	0	0	0	0	0	0	0	0	0	0	0	0	19.9385	0	137.261	0	0.537368	0	0	0	0	0.5134	0	0	0	0	0	0	0.774432	0	0	0
WP_008538939.1	MEELINLKINNMPISVKKGTKILQAAQMLHIDIPHLCYHPDQRIKARCRICSVEVVGQRRLLAACSTECWEGMEVFTDTKVVRDTQRGILQLIMADHEENCLTCPRNGNCVLQQLCSRFNVLRPNIPHVGQHIEKRGANPSLVHDPEKCVKCGRCIRACKEIQGIEVLGFAGRSTNIHVTTPFDAEFDNTKCVLCGQCSLACPVGALVEKDDTDRVLDAIFDPNKTVIVQTAPSVRIALGDEFGMPKGSIVTKKMVTALRMIGFDKVFDTNYGADLTITEEANELIERIKSGKKMPMATSCCPGWVNYMEKHYPDLLDHLSTTKSPMQIFSAITKTHYAKQENLDPKNIFTVAIMPCIAKKYEITRPEMAHDGRPDTDAVLTTRELIKLIKYIGIDFEN…	[FeFe] Group A3	[FeFe] Group A3	Bifurcating	Labile	3	[FeFe]-centre, 3 x [4Fe4S] clusters, 1 x [2Fe2S] cluster	NADH dehydrogenase, thioredoxin	5.69023	9.79263	0.514858	0	60.7627	0	0	0	0.459702	0	0	0	0	0	0.521209	0	0	0	0	0	0	14.3656	2.864	112.305	0	0	0	0	0	0	0	0	0	0	0	0	0.433716	0	0	0	0
WP_022184401.1	MARSVIDPVTRIEGHLRVEMEVENGVVSDAWVSGGCFRGMELVVKDRTPEDAAHIVQRICGVCPVSHSHAATIAAEKAYGITISNNARIIRNLIEGAQFLHSHILWFYTLAALDYVNPLNALKANVGSAYDLVEAAGTSCQSDLKALQERLTKFAENGQLSIFSGNWWKNGQSDTEFKLPAELDLIATAHYIEALTMQSKASEVCALLGGKMPHVMTIVPGGTSFVPTEEKLDDLWSLVHELRDWIKATIIPDTKAIAPYYKEALSFGKGCGRYVAWGVFERPSFALADRYLPSGVIDENLKLSEVDTDLIKEYIGHSWYVGDSDLNPREGVTEPEFTEYYKAGTLREENGHEIGDINDRYSWSKAPSYDGKCMEAGPFSRVLAAYLRGNEFVKPAVDG…	[NiFe] Group 1a	[NiFe] Group 1i	Anaerobic Uptake	Sensitive	3	[NiFe]-centre, 3 x [4Fe4S] clusters	Cytochrome b	9.89524	1.95684	0	0.774999	0	0.459812	73.3874	1.09572	18.8478	0	0	0	2.74687	0	13.0302	0	0	0	1.51208	3.14915	10.8999	3.09603	15.752	0	5.23375	84.3669	0	0	37.3544	0	3.25153	0	145.587	0	0	0	0.867433	3.87216	42.6032	9.23553	5.14532
WP_015556986.1	MGTMIINGRPVEFTDEKNVLAVIHKAGIDMPTLCYYSELSTYGACRMCVVEDARGKIDSSCSMEPRDGLEIRTNTARLLRYRRMILELLLAAHECDCTVCSKSGSCRLQMLAHRYGVKRVRFEDTRERLPQDESSYAIVRNPNKCILCGDCVRVCREIQGMGILDFVNRGSEARVRPAFNEPMIHTRCISCGQCAAVCPTNAIRVRRHIDDVWKAIFDPKKRVVAQIAPAVRVALGERFGLEPGVNSIGKVVAALRTLGFDHVTDTTLGADFTVMEEAAELMQRLEDGGPFPMFTSCCPAWVKYCENCAPDLLKHLSTCRSPMQMFSPVIKAYYAQAEADGRETCSVAIMPCAAKKMEAAREEFRTNGVPDTDYVLTTQELIEMIEEAGIDFDALVDLA…	[FeFe] Group A3	[FeFe] Group A3	Bifurcating	Labile	3	[FeFe]-centre, 3 x [4Fe4S] clusters, 1 x [2Fe2S] cluster	NADH dehydrogenase, thioredoxin	8.76636	1.97609	4.63372	10.85	26.8486	10.1159	8.15415	9.86149	25.2836	15.625	6.84393	0	0	6.98804	11.9878	2.6909	5.99537	9.21666	0	0	0	15.3563	30.072	17.8261	39.1285	18.8079	9.08503	0.924536	3.01854	3.44752	12.4927	18.02	0	1.01996	8.46979	4.16495	0	6.19546	1.72134	20.1009	1.28633
WP_015359535.1	MRKFDTKVQHLKYKVLKEVARLAWNDTLLENLMDIPQMIIPGKTPTMRCCVYKERAIVAERVKLAMGGNKDNPNVIEVIEIACDECPMGGYEVTNACRGCLAHRCEDACKFGAIYFDQNHVAHIDKTKCRECGACSRVCPYSAIISLRRPCENACKIKAIHMSEAKTAAIDNKKCIACGACVYQCPFGAIMDKSYILDAIDIIKKSDNNRKYKVYAVVAPSISSQFTYAKLGQVITGLKELGFYTVIEAALGADMVAYSESRELVEKGFLISSCCPAFVSYVEKNFPGLAPSISHNLSPMATIAKYLKEREKNCKVIFIGPCTAKKAEVQKESVRPYVDVVLTFEELQALFDSKDIDITTLPEDVLDNASYYGRIFARSGGLTDAIAEGLKEHGFTDFE…	[FeFe] Group B	[FeFe] Group B	Evolving	Labile	1	[FeFe]-centre, 3 x [4Fe4S] clusters, 1 x [2Fe2S] cluster	None	18.7183	4.35127	9.7823	7.74999	32.501	21.6111	7.19484	8.76577	22.9851	49.6324	27.3757	4.87794	16.4812	2.32935	41.1755	0	11.9907	8.75582	0	1.57458	6.81246	23.0345	87.3521	7.13046	51.0913	21.4947	9.08503	18.4907	11.6968	23.6401	2.90926	7.39281	1.59986	1.35995	4.2349	2.97496	6.50575	13.9398	4.30335	73.8843	13.5065
WP_008862337.1	MTKRIVVDPITRIEGHLRMEADIENGVITDAFSTGTMIRGIEIIVKDRDPRDVWAYVGRVCGVCTSIHSLCSVRAVEDALHIVIPPNAEQVRNLMQSAVTIQDHVTHFYQLQALDWVDVMSALNADPRKAAEVAQSLSEWPKNSIGYFVEIQKKIRTFIETSKFSIFSNGYWGHPAYKLPPEVNLVALAHYLEALEVQKEIVKVQTIFGGKNPHPNFLVGGMACAVNINDPNALNMERLNYVAQIIERTQTFVRQVYLPDVLAILSYYPEWTKIGGGLHNYIAYGDYPMGNYGELSTYKSPRGIVVGRDLSKVVEFDPWAMDGLLEFVNNSWYSYTQGKDVGLHPSVGETHLNYTGATPPYEYLDRDQPYSWIKTPRYKGMPMETGPLARNIVGHASGN…	[NiFe] Group 1d	[NiFe] Group 1d	Aerobic Uptake	Tolerant	3	[NiFe]-centre, 1 x [4Fe3S] cluster, 1 x [3Fe4S] cluster, 1 x [4Fe4S] cluster	Cytochrome b	11.4992	2.55791	0	0	16.957	4.1383	6.23553	21.9144	10.5731	3.67647	8.21271	61.7873	26.0953	0	0	1.07636	0	5.06916	0	0	0.454164	37.5239	48.6881	1.78261	0	20.9574	0	0	1.88659	8.86506	111.065	1.8482	2.39979	1.69994	4.2349	0	0	2.3233	0	28.7931	1.92949
WP_022418160.1	MRKFDTKVQHLKYKVLREVAKQAWADTLQDNLLDIPKIIVPGKIPTMRCCVYKERAILAERVKLAMGGNKQNPNVIEVLDIACDECPMGGYEVTNACRGCLAHRCEDVCKFGAITFDENHVAHIDKTKCKECGACSRVCPYSAIHNYRRPCETACKVKAIYMGDEKQACIDNGKCISCGACVYACPFGAINDKSFILNVIDMLKGSNGNRDYKIYAIVAPSISSQFTYAKLGQVITGLRKLGFHTVIEAALGADMVAQAESKELVEKGFLTSSCCPAFVDYINKNFPELKQFVSHNLSPMATIAKYIKSKEANCKTVFIGPCTAKKMEVQKESVKPYVDAVLTFEELQALFDSKEIDITTLEEGVLDNASYFGRIFARCGGLADAVAEGIKEQNLEFAL…	[FeFe] Group B	[FeFe] Group B	Evolving	Labile	1	[FeFe]-centre, 2 x [4Fe4S] clusters	None	19.1137	7.6566	13.3863	13.95	43.8057	19.7719	5.75587	5.4786	24.3642	60.6618	14.3722	1.62598	16.4812	0	56.8118	0	2.99768	10.1383	0	1.57458	5.44996	27.8643	181.864	16.0435	83.2415	17.1958	9.78388	17.5662	13.9607	9.85006	4.79173	12.0133	3.19972	0.679975	1.05872	5.35493	0.433716	20.1352	1.291	92.8986	3.85899
WP_019264891.1	MVKLTMEPVTRIEGHAKITVQLDDDGNVVDTRLHVMEFRGFEKFLQGRPVEELARIVPRICGICDVQHHLAAAKAVDQIFGFEDEKILPTAYKMREIMNWGSFMHSHALHFYFLAAPDLIIPDGTRKTRNVFQIIKDQPEIALQAIELRRNGLEIVRKIGGRPIHPTSSTPGGISTELDDETQKDLLQRAQRNVELAQATLDLAKPIFEEKMDLVKSLGYFGDTRHCGLVNDGVWDVYNGDVRIKDVDGSIYTEYKNLEYKDVVAEHVKPYSWLKFPYIKELGYPEGIYRVAPLSRINVADKMPDAAPLAQAAFEEFHDKFGYAQAPLLFHWARLIELLASAECAADALDQDLSGPKFPEELERTAGEGAGIVEAARGTLIHNYACDDNGLVTEANIVV…	[NiFe] Group 3c	[NiFe] Group 3c	Bifurcating	Sensitive	4	[NiFe]-centre, 3 x [4Fe4S] clusters	Polyferredoxin, [FeS] protein	1.51853	0.108143	0	3.09999	0	0	0	0	0	13.7868	0	0	0	0	0	0	0	0	0	0	0	0	0	0	0	0	1.3977	10.1699	0	0	0	0	0	0	0	0	0	17.0375	0	29.8797	0
WP_022349260.1	MVEITIDGNVYEAEEGATILEVAREHRVDIPTLCYLREINEIGACRVCLVEVEGIDHLVAACNNEVTDGMVVYTDTPRVRRARVANLQLILSRHDRRCPTCFRNGTCQLQALTDRMGVHEVPYTTFFETKPIDARFPLVREPEKCVNCLRCVSTCQKVQALGVWDLVDSGSRAHVDAVAPDDCAFCGQCIANCPTGALHERDDTERVFDAIFDPDTITIAQVAPAVRSSWAELLDLGGKPPTPGRMVAAIRRLGFDYVFDTDFAADVTIMEEASELIEHLKEGAEGPMFTSCCPGWVRFAKTRYPELAKKLSTTKSPQQIFGALAKTYYAEILGVDPAKIFVVSYMPCVAKKMEAAYPGMDSTGTGPDVDAVLSVRELTRQLRQRFVNVDLLEEEDFDR…	[FeFe] Group A2	[FeFe] Group A2	Evolving	Labile	2	[FeFe]-centre, 3 x [4Fe4S] clusters, 1 x [2Fe2S] cluster	NADH-dependent glutamate synthase	2.01941	0.274465	0	2.325	0	0.919623	4.79656	0	4.59702	10.1103	2.05318	0	0	16.3054	0.521209	0	0	0	0	0	1.81665	1.4861	0	1.78261	1.99381	6.44842	0.698849	0	3.39586	0	1.0268	1.38615	13.5988	0	6.35234	2.37997	0	3.87216	4.30335	1.6298	0
WP_014118796.1	MVNIEINGKALSVPEGSTILSAAQGAGIPIPHLCYLKGINEIAACRICVVELEGTQRLIPACNTQVEEGMVIKTNSPRVRSARRTNLRLILSEHNSTCTTCIRSGNCALQTLSHDLNIHYQPYRLQPEKSRVDLDAPVVREASKCIKCMRCVQICDKVQGMHIWDVAGTGSRTTVDVSFNRLLKNTDCTFCGQCVTHCPTGALTIRDDSNKVLRALADPEITTVIQVAPAVRVAWAEAFSLSPKFATAGRMVAALRRMGFDYIFDTNFTADLTIMEEGSEFLERYTHRGKYRWPMFTSCCPGWVRFVKSQFPSYTECLSTAKSPQQMFGAIAKSYFAEKKGIDPHKMFVVSIMPCSAKKSECELPTMKDACGDPDVDAVLTTREMVRLLRSDCIVPTDL…	[FeFe] Group A2	[FeFe] Group A2	Evolving	Labile	2	[FeFe]-centre, 3 x [4Fe4S] clusters, 1 x [2Fe2S] cluster	NADH-dependent glutamate synthase	25.6642	6.81282	12.8715	35.6499	69.2412	11.9551	27.82	36.1588	69.4149	76.2868	21.2162	45.5275	6.86718	9.31739	26.5817	4.30544	11.9907	15.6683	18.145	3.14915	9.53744	40.6199	67.3041	26.7392	53.5836	61.26	14.6758	3.69814	18.1112	5.91004	23.7875	32.3436	4.79958	6.45976	32.8204	4.75994	3.90345	51.1125	1.72134	61.3891	3.21582
WP_022184688.1	MGKAQVIPFGPQHPVLPEPLHLDLVVQDETVVDVLPQIGFVHRGLEKLVETRDIHQYIYVAERICGICAFGHSYGYAQTIESMMNVEVPKRAEFLRVIMHELSRIHSHLLWMGLAADAFGYEALFMHCWRLRERILDIFEAVAGGRVILSYTLLGGVAKDIEAPTLAAIKDTLNSLKKEYAEICNAFLKDSSVKNRTVGVGFIDEEHAREYGMVGPFARASNFNNDVRCLGIGAYGNLSSFEPILDTQGDCYARIKVRANEVLQSIDIVNELIDKIPDGPILNPVKGAPEDGAEASSILEQPRGEVYYYAAGNGTKYLERMRIRTPTSQNIAGMTMALKGCEISDVNMIVLTIDPCISCTER	[NiFe] Group 4e	[NiFe] Group 4e	Evolving	Sensitive	6	[NiFe]-centre, 1 x [4Fe4S] clusters	NuoL, NuoH, NuoC, [FeS] protein	4.96097	1.04449	0	0	0	0	39.8114	0	8.27463	0	0	0	0	0	6.25451	0.53818	0	0	0	3.14915	5.90413	0.99073	10.024	0	2.74149	37.6158	0	0	13.9607	0	1.88247	0	73.5936	0.339987	0	0	7.37318	0	20.6561	8.69227	0
WP_022378933.1	MFNVTVDGKAVSVKEGSTILDAAQAASVSIPTLCWMKDLNEIGSCRICVVETEGDDALSAACNTPVRDGMNINTRSPRVIAARRENMRTILEGHRSECTTCERSGTCALQRTAAELNVGELDFDPVFDFEAWDEDFPLQRDASKCIRCGRCVVECAKVQHCSVWDFKGPSAFRSITVRDGKEISEAGCALCGQCITHCPTGALTARNDIAKILDALADPDTMTVIQFAPAIRAAWGEVMGLTHEEATPGRMAAAAKSLGFDRVFDTDFAADLTIMEEGNEFIEWYTSGKKRPMFTSCCPGWVRFAKLHYPQFVEQLSTSKSPHQMLGAVVKNTLKEPMEAEGKKRMFVVSVMPCVAKKYECGVPQLSTKAGPDVDAVLTTREFNSMLRMFKVNCAELEE…	[FeFe] Group A2	[FeFe] Group A2	Evolving	Labile	2	[FeFe]-centre, 3 x [4Fe4S] clusters, 1 x [2Fe2S] cluster	NADH-dependent glutamate synthase	2.09299	0.30798	0	13.95	22.6094	0	2.39828	28.4887	0.459702	12.8677	0.684393	0	0.686718	0	1.56363	0	0	0.921666	0	0	0	0.371524	0	1.78261	0	0	0	0	1.50927	0	0	0	0	0.339987	0	0	0	9.29319	0.86067	0	4.50215
WP_015518595.1	MVNIKINGIEYAVEEGTTILEACRQNGIRIPTLCWLKDINAIGACRICVVEMTGARSLVASCVYPLSKFDEGKNILTHSPAVLQSRKMTLHLLLSDHNMDCLACSRNGSCELQELCKELGVDDTTFFEGEKNEYDIDYSSKHMFRDNNKCIHCRRCIAACDKLQGIGVIGANNRGFKTSIDCAFDLDLAETACVSCGQCITACPTGALAEKDDTDKVWDALADPEKVVVVQTAPAVRASLGEAFGYPMGTPVEGKMVAALRRLGFNAVFDTNFGADLTIMEESHEFLDRVTNGGVLPMITSCSPGWIRFCEAYFPEFIPNLSSCKSPQQMNGAITKTYWAKKMGIDPKNIVSVSVMPCTAKKFEIGREDQSAAGVPDVDISITTRELVKMINRAGLRFR…	[FeFe] Group A3	[FeFe] Group A3	Bifurcating	Labile	4	[FeFe]-centre, 3 x [4Fe4S] clusters, 1 x [2Fe2S] cluster	NADH dehydrogenase, thioredoxin, thioredoxin	13.6691	3.69843	1.54457	1.55	4.23926	7.35699	0.959312	6.57433	2.29851	18.3824	2.73757	1.62598	2.06015	0	220.471	0	2.99768	3.22583	9.0725	1.57458	0.454164	3.5914	5.72801	1.78261	75.2663	3.22421	1.3977	7.39628	1.50927	7.88005	0	0.924102	0.799931	1.01996	7.41107	2.37997	0.433716	10.8421	1.291	40.2017	2.57266
WP_014079355.1	MHEEILKREHKAEKQRKEEMRYDQMDCLLLAGEEKTERTIPVCETVFPEKFADLNAVREVLLTPEKQVYALIAPAFMGQFGEGVSPGAIRAALKRAGFSGMVEVAVFADILTLKEALEFDRHVNRDTDFLLTSCCCPVWVSMIRNIYGELVPYMPGAVSPMIAAGRAVKKMHPDAVTVFIGPCLAKKKEAKEPDICDAIDVVLTFQETAMLFEAMGIAPQQMEEDASEHSSGAGRIYARTGGVSEAVVRTVEQLHPGRKIAVRPMQADGGKACKQMIEAIQEGKTEANFFEGMGCVGGCVGGPRALLPREEGSAYVDHYGKEALYQTPLENPYVIELLEKLGFSTVEDFLEKSDLLTRHF	[FeFe] Group B	[FeFe] Group B	Evolving	Labile	1	[FeFe]-centre, 2 x [4Fe4S] clusters	None	6.21775	1.57975	5.14858	4.64999	38.1533	8.73642	4.79656	0	1.83881	2.75736	0.684393	6.50392	0	0	7.81813	1.07636	0	15.6683	16.6329	1.57458	0	3.46756	20.048	14.2609	15.7012	3.76158	0.698849	19.4152	0	3.44752	1.71133	17.0959	1.59986	0	2.11745	12.4948	0	2.3233	0.86067	2.71633	3.21582
WP_021900040.1	MGKAQVIPFGPQHPVLPEPVHLDLVVQDETVVDVLPQIGFIHRGLEKLVETRDIHQYIYVAERICGICAFGHSYGYAQAVETLMGAEVPMRAEYLRTIMHELSRIHSHLLWMGLAADAFGYESLFMHTWRLRERILDIFEAVAGGRVILSYTLLGGVTKDIDAPMLASIKDTLKGIGKEYGEICNAFLKDSSVKNRTVGVGIVDEEHAYEYGMVGPFARASNVNNDVRCLGIGGYGELSSFEPILDTAGDCYARVKVRALEVLQSIDIINELIDKIPDGPVHIPVKGAPADGSEACNILEQPRGEVFYYCSGNGTKNLERMRIRTPTSQNLAGMTMALKGCEIADVNMIVLSIDPCISCTER	[NiFe] Group 4e	[NiFe] Group 4e	Evolving	Sensitive	6	[NiFe]-centre, 1 x [4Fe4S] clusters	NuoL, NuoH, NuoC, [FeS] protein	0.824463	0	0	0	0	0	0	3.28716	0	9.19119	0	1.62598	0	0	0	0	0	0	0	0	0	0.99073	0	0	0	0	0	0	0	0	0	0	0	0	0	0	5.63831	10.0676	0	0	3.21582
WP_021900643.1	MYNVTIDAKAVSVEEGSNILDAAHAAGVSIPTLCWMKDLNEIGSCRICVVETEGDDALSAACNTPVRDGMNIRTNSPRVIAARRENMRTILEGHRSECTTCERTGTCALQRTAAELNVGELDFDPVFDFEPWDEDFPLQRDESKCIRCGRCVAECAKVQHCNVWDFKGPSAFRGITVRDNKDITEAGCALCGQCITHCPTGALTARNDIPKVLDALADPETMTVIQFAPAIRSAWGEVMGLTHEEATPGRMAAAAKSLGFDRVFDTDFAADLTIMEEGNEFIEWYTSGKKRPMFTSCCPGWVRFAKLHYPQFVEQLSTSKSPHQMMGAVVKNTLKEPMEAAGKRNMFVASVMPCVAKKYECGVPQLSTEAGPDVDAVLTTREFNNMLRMFNVNCAALEE…	[FeFe] Group A2	[FeFe] Group A2	Evolving	Labile	2	[FeFe]-centre, 3 x [4Fe4S] clusters, 1 x [2Fe2S] cluster	NADH-dependent glutamate synthase	4.03621	0.223715	1.02972	3.09999	0	0.459812	1.43897	32.8716	1.3791	13.7868	0	0	0	0	0	0	0	0	0	0	0.908327	0.495365	4.29601	0	0	0.537368	0	0	0	0	0.171133	0	1.59986	0	0	0	0	77.4432	1.291	2.17307	7.07481
WP_013978878.1	MVNVTINGCAVEAREGMSLLSACEEAGFDVPTLCFMKNVNCIGSCRVCLVEVEGQGMCAACNTSVQEGMVVRTNTLAVTAARRANLTAIMSEHRTLCATCVRQETCALRKLASQFSLADARRELPPKGTWDEEFPLQRDSSKCIKCMRCVAECAKVQQCAVWGFTGAGSNLRVVVEGGSSIAESGCALCGQCITHCPTAALTARDDIDLVVDALADQEVVTVVQVAPAVRAAWGEGVGLASEEATPARMAAALRRLGFDKVFDTDFAADLTIMEEANEFIEWVQKDKPRPMFTSCCPGWVRFAKLHYPDFVSQLSSSKSPHQMMGAVVKNSMREEIEAAGKRMFVVSIMPCVAKKYECAVPQLSTEVGPDVDAVLTVRELDRMLRLAGVDCTALPEEPF…	[FeFe] Group A2	[FeFe] Group A2	Evolving	Labile	2	[FeFe]-centre, 3 x [4Fe4S] clusters, 1 x [2Fe2S] cluster	NADH-dependent glutamate synthase	1.26814	0.172853	0	0	0	0.919623	3.35759	0	3.21791	0.919119	0.684393	1.62598	1.37344	2.32935	2.08484	0	0	2.765	0	0	0.908327	0.123841	7.16001	1.78261	0.249226	0.537368	0.698849	0	0.754635	0	0.684533	0.924102	1.59986	0	0	0	0	6.96989	2.15167	0.543267	7.07481
WP_009145673.1	MAQIYEALQKAGFAEVVEVGIGADITSVKEAEEYLDKVPAKQGFMTSSCCPAFVKLIKTQVPEAADKISDTPSPMLTCAELIKEKYPYAVTVFIGPCIAKKVEAREHRETINYVLSFEEIMCMLEGKDIKFAEMSGDAAYERDASKLGLSFPLTAGVSAAVHDTVAAMGGEVHNAQYCSGLDKCRDTVKAAAAGKLDCSYIEGMACPNGCIDGPDTVGDFHITKVALTKYAAAAPNKQAAQDKHTK	[FeFe] Group B	[FeFe] Group B	Evolving	Labile	1	[FeFe]-centre, 2 x [4Fe4S] clusters	None	4.85762	0.757838	0.514858	0	0	0	4.3169	0	33.0985	0.919119	13.6879	0	2.74687	0	2.08484	0	0	0	0	141.712	0	36.4093	8.59201	0	0	0	0	0	9.81025	0	0	1.38615	0	0	0	0	0	0	0	0	0
WP_020814848.1	MGTMIIDGQLVEYTDEKNILAVIRKAGIELPTFCYHSELSVYGACRMCMVEDKWGSTITSCSTPPKDGMEVWTNTDKLKKHRKMILELLLANHDRDCTTCEKSGRCKLQEIALKVGVKKVRFGQEKKEMPIDDLGPSIIRNPNKCILCGDCVRACQEIQGVGVLDFAYRGSNLQVTTAFNKSLQEVDCVNCGQCRVVCPTGALMIKKDIDRAYEALQNKNKRVIAQIAPAVRVAIGEDFGLQPGEISMGKIVAALRKLGFDQVFDTAVGADLTVIEEAEELMDRIQRKEKLPLFSSCCPAWFKYAEQKHPELMENVSSCLSPQQMFGAVIKEQFKKEHSTDERENIVIAIMPCTAKKYEASRPENTINGERQVDMVITTQELAIMIQENGIVFNELEDE…	[FeFe] Group A3	[FeFe] Group A3	Bifurcating	Labile	3	[FeFe]-centre, 3 x [4Fe4S] clusters, 1 x [2Fe2S] cluster	NADH dehydrogenase, thioredoxin	0.922214	0.0494808	0.514858	3.09999	2.82617	0.459812	0.959312	0	0.919403	0.919119	0	0	1.37344	2.32935	1.04242	2.6909	0	2.30416	0	0	1.36249	0.743048	4.29601	5.34784	0.996904	0.537368	1.3977	0	0	1.47751	1.71133	0.924102	0	0	0	0.594992	0.433716	0.774432	0.430335	3.2596	0
WP_009139069.1	MARSIIDPITRIEGHLRAEMEVTDGVVTDAWVSGGCFRGMELVVRDRTPEDAAFIVQRICGVCPVSHMHASSIAAEKAYGISIPNNARIIRNLIEGSQFLHSHILWFYNLAGLDYVNPLNALSADPVAAYDLATELGTPSADFVGLQDRLKKFAENGQLSIFSGNWFDTGEYNLTPEADLILTAHYLEALQMQAKASEIAGLLGGKMPHIMTIIPGGTAFVPTAEKLDDLKGLVDELYTWVANTMIPDTLAVAKFYPEATTFGKGCGRYGAWGVFERPSMEMNDRYLPAGVLDDQLNLSDVDESKITEYVGHSWYEGDADLPPFEQGVKPAFTEYNVDDRYTWNKCPRYDGKPLETGGFARLLVAYKRNVPFVVEHIDSMLVALGAQKGDLSALQNTLG…	[NiFe] Group 1a	[NiFe] Group 1i	Anaerobic Uptake	Sensitive	3	[NiFe]-centre, 3 x [4Fe4S] clusters	Cytochrome b	4.51461	1.15368	0	0	0	14.2542	8.63381	5.4786	6.89552	0	0.684393	8.1299	0	0	5.21209	11.84	0	0.460833	0	1.57458	0.908327	0.619207	10.024	3.56523	1.74458	34.929	0	28.6606	1.88659	0	0.684533	2.7723	0.799931	0	0	0	0	3.87216	18.0741	0	28.9424
WP_014117537.1	MSQGIMYVDGQRVAFDGEKNVLAVIRKAGIDMPTFCYYSELSVYGACRMCVVEDENGKIDASCSMEPKDGMRIRTNTARLLKHRRMILELLLASHSKDCTTCEKNGKCRLQELASRFGIRHIRFSDTRTRHELDESSPAIIRDPNKCILCGDCIRVCEEMQGMGIIDFARRGSHLQVMPAFDRKLSETDCISCGQCAAVCTTGAITIRNEIGAAWRALHNPDKRVVVQIAPAVRVAIGEAFGLPSGNNAIGKTVSALKMMGAEEVFDSIFGADLTVMEESKEFLARLNNGGPFPMFTSCCPAWIKYLETENSKYLKNISTCKSPMEMFAAVLKDQYAEIDRQDGRETFHIAIMPCTAKKMESARKDFQHGGKPDVDLVLTTQELINMIKESGIRFTELE…	[FeFe] Group A3	[FeFe] Group A3	Bifurcating	Labile	3	[FeFe]-centre, 3 x [4Fe4S] clusters, 1 x [2Fe2S] cluster	NADH dehydrogenase, thioredoxin	40.441	12.9337	14.416	103.85	53.6973	12.4149	25.4218	31.7759	85.9642	33.0883	36.9572	47.1534	14.4211	16.3054	39.0907	0.53818	41.9676	36.4058	16.6329	7.87288	11.3541	74.1809	156.088	64.1741	112.65	97.8011	44.7263	13.868	21.8844	34.4752	78.0367	64.6871	5.59951	5.4398	38.1141	27.9646	4.77088	30.9773	6.02469	79.3169	10.9338
WP_013979648.1	MTRSVIDPITRIEGHLRVEMEVTNGKVSDAWVSGGCFRGMEMVVENRTPEDAAQIVQRICGVCPVSHAHSSTIAAEKAYGIQISNNARIIRNLIEGAQFLHSHILWFYNLAALDYVNPLNALEADPMDAIDLAKSVGTSVNSDFVALQDRLKTFASNGQLSIFSGNWFDAEDGTGYTLLPELDLICTAHYLEALSMQAKASQISALLGGKMPHVMTIVPGGTAFVPTAQKLDDLKYLVDEIYNWVEATMIPDTLAIAPFYMDALNWGKGCGRYVAWGVFEGAGEYSDYTEQMKNRYLPMGVLDDNLNISDVQENLITEYVGHSWYKGEETYTSPYYTTEPEYTTYDVNDRYTWCKCPAYDGKCYEAGGLSRVLAAYKRNVPFVVDQVNGLLEALGAPGQ…	[NiFe] Group 1a	[NiFe] Group 1i	Anaerobic Uptake	Sensitive	3	[NiFe]-centre, 3 x [4Fe4S] clusters	Cytochrome b	1.73291	0.376922	0.514858	1.55	0	2.29906	8.63381	0	3.67761	1.83824	1.36879	0	4.80702	0	0.521209	0	0	0	0	0	0	6.43975	2.864	1.78261	0	2.68684	0	0.924536	3.77317	0.492503	0.171133	0.462051	0.799931	0	0	0	0	4.64659	4.73368	4.34613	13.5065
WP_015706988.1	MSEKSYMKVDGIRVEIAGERNLLEVARKAGVEMPTFCYHSELSIYGACRMCVVEIEGAGLEASCSAQPRAGMSIHTNTVRLRRYRKNILEMLLANHCRDCTTCEKSRQCKLQELALRFNLDDVRFPNKAMDHKIDDQSLCLTRDSSKCILCGDCIRMCNEIQGVGAIDFAGRGASMRVSAIFDKPLAESGCVGCGQCARVCPTGAIVVKNDSAAVWRALEDKNSVVSVQIAPAVRVALGDAFGLEGDCSGLIVAALRRIGFDVVYDTATGADLTVIEEASELMQRVKEKKALPLFSSCCPAWVTFCEQRYPELLNCVSSCRSPMQMLASLIRETEKNAKGDDEIKYVHVAIMPCTAKKAEAARSEFRAADAQDVDHVLTTLELIRMIREAGIVFSELES…	[FeFe] Group A3	[FeFe] Group A3	Bifurcating	Labile	3	[FeFe]-centre, 3 x [4Fe4S] clusters, 1 x [2Fe2S] cluster	NADH dehydrogenase, thioredoxin	1.62698	0.399797	0	6.97499	0	0	0	0	1.3791	2.75736	0	1.62598	0.686718	0	0.521209	0	11.9907	2.30416	1.51208	0	0	3.71524	8.59201	0	10.2183	4.29895	0	0	3.01854	0	1.88247	2.31025	0	0	2.11745	0	0.433716	0.774432	0.430335	2.17307	0
WP_015518171.1	MDKKLRKFDTKVQYLKYKVLREVARHAWTTEGTEKPADSFSFFNDVAKKIVKDKPTMRCCIYKERAIVSERIKIAMGGDPTNPNVIEVIDIACDECPVGGYDVTEACRGCIAHRCEDVCRMGAITFDEHQKAHIDKSKCVNCGQCAKVCPYGAILEFKRPCERACKIGAISRATDTSSAAAHIDNDKCISCGACVYTCPFGAISDKSYIVDIIETLKGSDNSKNYKVYAVVAPSIASQFSYAKLDQVVTAIKQLGFHSVVEAALGADMVAYKESKELAEKGFLTSSCCPAFVMYIEKAFPTMTDKISHNLSPMAEIAKYIKDSDPTAKVVFIGPCTAKKMEVQWDKVKPYVDYAMTFEELQAIFDSKDIEVSELEGTVLDNASYYGRIFARCGGLADAV…	[FeFe] Group B	[FeFe] Group B	Evolving	Labile	1	[FeFe]-centre, 3 x [4Fe4S] clusters, 1 x [2Fe2S] cluster	None	38.419	13.0141	24.1983	51.9249	28.2617	39.5438	9.11346	19.723	21.606	63.4192	39.0104	4.87794	18.5414	16.3054	207.962	1.07636	53.9583	11.9817	15.1208	4.72373	15.4416	45.6974	18.616	1.78261	95.4536	33.8542	20.9655	58.2457	32.4493	59.5929	16.7711	25.8748	2.39979	2.37991	10.5872	10.7099	8.24061	34.8495	6.02469	90.1823	11.577
WP_026393504.1	MKEVTFKINGQEMTVPEGTTILEAARQSNIDIPTLCYLKDVNEIGACRMCLVEIAGARALQAACVYPVANGIEVLTNSPAVRKARRVNLELILSNHNRECTTCVRSENCELQSLATDLGVSEIPFEGDKSGTLVDDLSTSVVRDETKCILCKRCVSVCTNVQSVAVLGSVGRGFTSQVQPVFNKSLAEVGCINCGQCIINCPVGALKEKSDIQRVWDAIADPSKTVIVQTAPAVRAGLGEEFGYPMGTSVTGKMAAALRRLGFDKVFDTDFGADVCIMEEGTELIGRVTNGGVLPMITSCSPGWIKFIETYYPEAIPHLSSCKSPQNITGALLKSHYAQANGIDPKDMVVVSIMPCTAKKYEVQREELCTDGNADVDISITTRELARMIKEARILFNKL…	[FeFe] Group A3	[FeFe] Group A3	Bifurcating	Labile	4	[FeFe]-centre, 3 x [4Fe4S] clusters, 1 x [2Fe2S] cluster	NADH dehydrogenase, thioredoxin, thioredoxin	2.30945	0.498513	1.54457	2.325	11.3047	1.37943	1.43897	0	2.75821	3.67647	1.36879	3.25196	0	0	6.25451	0	2.99768	3.68666	1.51208	0	0.454164	3.5914	5.72801	1.78261	7.47678	5.91105	1.3977	0	4.52781	0.492503	3.25153	2.31025	0.799931	0	1.05872	0	0	1.54886	0.430335	9.7788	0
WP_015904515.1	MIGTINGKKVEFSKDQTVLEVARANGHFIPTLCELADLDHTPGTCRVCLVDIKRRNDVNHRIVTSCTTPMEEGMAVLTRTPKVRQMQRLQVELLLADHNQDCASCVRHGNCELQDVAQFVGLEQTRYNYPEFYERRTRDYSSPSVVRDMSKCIRCFRCVKVCREIQGIDALVITQKGLETEISVRDHLPLNESDCISCGQCILVCPVGALAGRNNIEDAMDLIYNPELITVVQFAPAVRTAMGEEFNMAKGENVEAKMITALKRLGVDVVLDTNFAADLVIMEEGSELLHRLKNKGTLPMFTSCCPGWVNFVEKNYPEMTPNISTTSSPQQCLGAMAKTYLAEKMDLDPDRIRVISIMPCTAKKGEAQRPEFQRNGRPDVDVVLTTREFSRLLKREGLD…	[FeFe] Group A2	[FeFe] Group A2	Evolving	Labile	2	[FeFe]-centre, 3 x [4Fe4S] clusters, 1 x [2Fe2S] cluster	NADH-dependent glutamate synthase	0.944324	0.0759252	0.514858	0	7.06543	0.459812	1.43897	5.4786	2.75821	3.67647	0	0	0	0	2.08484	0	0	0	0	0	0	0	2.864	0	0	3.22421	0.698849	0	0.754635	0	0.342266	4.62051	0	0	0	0	0	1.54886	0	2.17307	0
WP_008908605.1	MSYVIPIGPYHPSLEEPIHAKLYTEGEIIKDAEVFIGYNHRGIEKLAQEKNFIQTLVLVERVCGICSHSHPFAYAQAIEKIANMEVPKRGQYIRVIMAELERLHSHYLWLGIAAHLVGYDSLFMHIWNVREKIMDILEAISGNRVNYGMIIIGGSRRDISDDLRRNILQILDEFKAEHEKIKEIVLNDKTLAMRTKGVGVLPKDIAIKMGTIGPHARASGVKVDVRKDAPYSSYEDFEFDVPVVEDGDVFARILIRALEVDESIKIIKQALENLPEGPINLGMKIPKVPAGEFTQRVEAPRGQVIYYVVTDGGQTNYRVSIHVPTFKTAPTVPYMLRNNTVADAGLIIASIDPCFSCLDR	[NiFe] Group 4d	[NiFe] Group 4g	Evolving	Sensitive	6	[NiFe]-centre, 1 x [4Fe4S] clusters	NuoL, NuoH, NuoC, [FeS] protein	1.00572	0.379545	2.05943	0.774999	1.41309	7.8168	0.959312	0	0.919403	2.75736	1.36879	0	6.18046	0	2.08484	0	0	0	0	0	0	0.495365	0	0	1.49536	2.14947	1.3977	0	0.754635	0	0	0.462051	0	0	0	1.18998	0	2.3233	0	1.6298	0
WP_013252233.1	MADTMRGVYTNLTKIRRDVFREVARVCYSLNDNPDGTDEDFDARFDELPFQILPGDVATYRESVFLERAIIGERIRLAMGLSLQGVDRPARISEGFANSEVGDLAYYEPPLINVIKFACNACKDNVYTVTDQCQGCLAHPCREICPKQAISFVDKRAHIDQDLCVQCGMCERTCPYHAIHHHVRPCAAACGMHAIGSDEHGRADIDYEKCVSCGQCLVNCPFGAIADKSQIGQVIWSILAGDEVIAAVAPSFVGQFGGKGNVGKLREAFKRLGFSGVEEVALGADLCTVQEADDFLDEVPDKLPFMGTSCCPAWSVMAKKEFPEHADCISMALTPMTLTARMIRTRHPNAKIVFVGPCAAKKLEAMRRSVRSEVDFVLTFEEMAGMMEARGIDYLALKD…	[FeFe] Group B	[FeFe] Group B	Evolving	Labile	1	[FeFe]-centre, 2 x [4Fe4S] clusters	None	2.79642	0.984007	1.54457	1.55	1.41309	1.37943	2.39828	3.28716	5.97612	4.59559	1.36879	1.62598	5.49374	2.32935	3.64846	0	0	1.84333	3.02417	6.29831	0.908327	1.98146	4.29601	7.13046	3.73839	2.68684	1.3977	0.924536	6.03708	2.46252	2.0536	3.23436	7.99931	0.679975	2.11745	0	0	10.8421	4.73368	6.5192	0
WP_013251691.1	MVRLTIDGREVEVEEHTTILDAARTAGVNIPTLCYLRDINEIGSCRVCAVEVEGIDQLVASCNNYVLDGMVVRTNSPKARAARKVNVELLLSRHKTACTSCVRSGNCTLQELANDLNIYYLDYAEHVPFVHWDKTYPLIRENHKCIDCMRCVQVCDKVQASRIWDATSRSTHRTVNVVGGRSFDDVDCTYCGQCITHCPTGALRERDDTERVFRALADPNVTTIVQVAPSVRTSWGDEFGLGADEGSLGRLVSALRPMGFDYIVNTDFSADLTIMEEGTELLAHMAREGDKDAAERLPMFTSCCPGWVRFVKAHYPQLVDHVSTSKSPQQMFGAVVKSYYADLLGLDPHGIFSVSIMPCVAKKAEADIECMNDACGDPDVDAVLTVREVTRMIRAEHVC…	[FeFe] Group A2	[FeFe] Group A2	Evolving	Labile	2	[FeFe]-centre, 3 x [4Fe4S] clusters, 1 x [2Fe2S] cluster	NADH-dependent glutamate synthase	2.3295	0.604586	2.05943	0.774999	5.65234	0.459812	1.43897	1.09572	2.75821	6.43383	2.73757	4.87794	3.43359	2.32935	4.16967	0	0	3.22583	0	0	0	3.09603	10.024	1.78261	3.48917	6.44842	1.3977	0	1.88659	0.492503	2.39586	0.924102	0	0	2.11745	0.594992	0	3.09773	0	7.60573	1.28633
WP_015518172.1	MSYLRLKKSNCKNCYKCIRHCPVKSIRFSDGQANIVEDECILCGMCFVACPQNAKQIRNDVGKAKELIVSGTPVYVSIAPSFVANYDGIGITALNDALKKLGFAGAEETAEGAQLVTEQYEKLVADGEHKIIISSCCHTVNTLIQKYYPQALPYLAQVKSPMLAHGEILKKKYPGCHTVFIGPCLSKKAEADAYAGAIDCVLTFEELTGWLKEENIEVCPVSDNAGRSNRAKTRLYPTTSGILRSMNKDNPEYLYMAIDGVENCRNALRDIIDGNVGKCFIEMSACVNSCIGGPAMDKKHEGVIHERRAVDEFAGSGRFDTVELADMTKSLPFISMQKTMPGSKAIEEILRKMNKSDPSQELNCGSCGYDTCREKAIAILQGKADLTMCLPYLKEKAES…	[FeFe] Group C	[FeFe] Group C3	Sensory	Labile	2	[FeFe]-centre, 2 x [4Fe4S] clusters, PAS domain	Phosphatase	24.8119	8.44799	12.8715	14.725	7.06543	23.9102	2.39828	13.1487	4.13731	42.2795	22.585	3.25196	5.49374	2.32935	273.113	0	2.99768	5.99083	9.0725	0	8.62911	9.9073	12.888	1.78261	95.2044	6.44842	3.49424	15.7171	4.52781	36.4452	3.93606	8.31691	0.799931	0.339987	19.057	4.75994	5.63831	23.233	2.58201	70.0814	0.643165
WP_013979629.1	MTKTAIQVDHIARVEGHGNVHVVIEDGVVKTVEMNVVEPARLFESMVRGRRFEEIPYIASRICGICSASHVVTDLRAIERVFGVEVTPRTRALRELLVYGSYLQNHASHLFVFAVPDFVGHKSVFPLADENPELFQQALGLKALGNELCTRVGGRSIHPITAVVGGFTHELEAADYLELANKMDAAMEFALQTVDLFSGFAVPDIASQGDMLAMVEPNYYPVECSNIARFLKAGIEFDANEVGDNLEEYTVAHSAALLCRVRSTGDPFFTGALARVNASWEHLGQKAKIAAAKAGLRPPEYNPFMNNVAQAVELVDALDRCAGLCRALAEPGAIEGSSEPVAFEVRAGRGVGFTEAPRGALFHDLELDDEGRVVHASIMTPTAQNVANLEADMRLLAEK…	[NiFe] Group 3b	[NiFe] Group 3b	Bidirectional	Tolerant	4	[NiFe]-centre, 3 x [4Fe4S] clusters	Diaphorase, [FeS] protein	4.08507	1.42555	3.60401	0.774999	0	5.51774	12.4711	3.28716	5.05672	3.67647	1.36879	1.62598	12.3609	0	0.521209	0	0	1.3825	3.02417	0	1.81665	8.54505	5.72801	8.91307	1.74458	3.22421	0	10.1699	3.01854	0.985006	0.5134	6.00666	5.59951	1.35995	1.05872	1.18998	1.30115	17.0375	6.45502	2.71633	18.0086
WP_012414922.1	MREILKLKKSNCKNCYKCIRHCPVKSIRVSGNQAHIINDECILCGQCFVVCPQGAKQIESDIEKVKVMLYGKEPVIASLAPSFIANYGGAGIKSLSKALKKLGFHSAEETAIGATMVKNEYENILAKKEHDILISSSCHSVNLLIQKHFPSALKYLANVMSPMQAHCRDIKKRYPGAKTVFIGPCVSKKDEAQRYPDIVDAVLTFEELTQWFKEEKITVEPEKNKTAEGKARFFPTSGGILKTMRGTAKKGEYKYIAVDGTEACIDALNDIKDGNIFRCFIEMSACKGSCIGGPIMEKYNRSPIKGYMQVAAYAGEKDFKVEDYSGKITQKRNPLHFNKKEIPPHEIEEILKQMGKTKPEHELNCASCGYNTCREKAAAVYLGNANISMCLPFLKDKAE…	[FeFe] Group C	[FeFe] Group C3	Sensory	Labile	2	[FeFe]-centre, 2 x [4Fe4S] clusters, PAS domain	Phosphatase	5.98323	2.13946	3.08915	4.64999	9.8916	4.59812	0	1.09572	5.05672	12.8677	18.4786	3.25196	0	2.32935	10.9454	0	2.99768	1.3825	1.51208	0	3.63331	8.42121	20.048	1.78261	15.9505	4.29895	6.28964	12.9435	6.79171	9.35756	2.90926	4.15846	0	0	5.29362	0	2.6023	7.74432	0.86067	14.1249	0.643165
WP_028086317.1	MGIMTIDGQRVEFTDEPNVLSVIRKAGIDIPTLCYHSELSIYGACRLCTVENERGKTFASCSEKPRDGMVIYTNTPRLMHYRKLILELLLAAHCRDCTTCIKSGECHLQELAHRLGVHEVRFENVREMQPIDNSSPAIIRDPNKCILCGDCVRMCDNIQNINAIDFAYRGTDALVTPAFNKKIAETNCVGCGQCRVVCPTGAISIHTNIDLVWEALADKNTKVIAQIAPAVRVAVGDQFGYAKGENVMGKLVGVLHRLGFDEVYDTSYGADLTVIEESKEFIERFTAGEKLPLFTSCCPAWVKHCETKYPELAENLSTCRSPQQMFGAVVREYYKDPEKNEGKRLVSVSIMPCTAKKEEILRPESMTNGKQDVDYVLTTTEIIRMIKKSGIVFDKVEIE…	[FeFe] Group A3	[FeFe] Group A3	Bifurcating	Labile	3	[FeFe]-centre, 3 x [4Fe4S] clusters, 1 x [2Fe2S] cluster	NADH dehydrogenase, thioredoxin	24.8377	8.80594	4.63372	3.87499	5.65234	8.27661	4.79656	3.28716	14.7105	3.67647	2.05318	0	169.619	34.9402	5.21209	0.53818	14.9884	15.2075	7.56041	80.3034	3.63331	19.9385	11.456	42.7827	5.98143	10.21	8.38618	5.54721	3.39586	60.5779	54.5915	152.015	51.1956	2.37991	8.46979	1.78498	2.6023	123.135	8.17636	5.43267	7.07481
WP_015710039.1	MTEYLNLKAADCKNCYKCIRHCPVKAIQFTGNSAQIIPEECILCGRCFVVCPQNAKEIRNDVSIAEALIGSGAPVYASLAPSFAANYTDESSHALSIEQMETALKELGFAGAEETALGAAIIKRQYDEMVKREDKNIVISTCCHSVNLLVQKYYPEALPYIAPLLSPMQAHSVDLKRRYPGAKTIFIGPCISKKDEADRYGGIVDCVLTFAELSQWFKQKRIDIGKCAPRNTESPVTHTLTRLFPVTGGILRTMAKENPQYTYLAIDGVTNIQRALEDIIKGKLDKCFIEMSACTGSCIGGPSMQNVAATNGIQRNTAPVRDYIAINAYAGSEDDPVFAYDTKTLSKSFPSLAVRKVHLGQNAIDEVLRKIGKTKPEHELNCGCCGYNTCRDKALAVLE…	[FeFe] Group C	[FeFe] Group C3	Sensory	Labile	3	[FeFe]-centre, 2 x [4Fe4S] clusters, PAS domain	Phosphatase, thioredoxin	4.90224	1.64086	3.08915	8.52498	4.23926	8.73642	0.479656	1.09572	0.459702	3.67647	5.47514	0	1.37344	0	3.12725	0	2.99768	0.921666	0	0	4.08747	6.31591	7.16001	0	1.99381	4.29895	2.09655	8.32082	4.90513	8.86506	2.39586	4.15846	0.799931	0	3.17617	0	1.73487	2.3233	1.72134	16.8413	0
WP_006352890.1	MPIGTNVKGKMVAALRRLGFDKVFDTDFGADLTIMEEANEFIERVQNGGKLPMITSCSPGWINYCEHYFPDMLDNLSTCKSPQQMTGAMIKTWYAEQNGLDPKDIVVVSIMPCTAKKYEIHRADQDAAGYPDIDIVLTTRELARMINRAHINFTDLPDEEFDPALGITTGAGAIFGATGGVMEAALRTAADWITGKDLSVIDYYTDVRGTDGIKTATYDIKDLTIKVGVASGLANAKELLNRVREGEHFDFIEIMCCPGGCVNGGGQPLQPSSIYNFTDLKTKRAKALYDEDKELPIRKSHKSPIIEKLYKEYLEKPGSHKAHELLHTSYSAKVKPVK	[FeFe] Group A3	[FeFe] Group A3	Bifurcating	Labile	4	[FeFe]-centre, 2 x [4Fe4S] clusters	NADH dehydrogenase, thioredoxin, thioredoxin	6.52645	2.22033	3.60401	9.29998	8.47851	5.05793	3.35759	3.28716	3.67761	11.9485	2.73757	3.25196	6.86718	0	1.56363	0.53818	8.99305	1.84333	1.51208	1.57458	8.17495	10.898	1.432	7.13046	7.47678	6.98579	5.59079	9.24536	4.15049	4.43253	2.567	4.62051	0.799931	0	4.2349	2.37997	2.16858	4.64659	2.15167	17.3845	1.28633
WP_009145644.1	MAPQPTTYFHSVELQRNKCQGCVSCVKLCPTEAIRVRNGKAEILGDRCIDCGACAAGCPYHAFNVKTDTLEGLADYAYNIVLPAPSLYAQFPDNIPLESIWQGLHNIGFDEIFDVSLASEYIALEIEEYVKKNSNGRKPLISSTCPAVMRLIQVKFPELIKQVVPVLPPAEAAAIYVKREAAARKQLPKELIGVWFISPCPSKETNIRQSVDVHHTELTGSFSLSEIYGLLLKNLGGTHELNVRTGSSYGMAWGTYGGEIESAGITNGLAIHGIDNVYDLLEQVSMNKMPQLDYVECSACKGGCLGGLLAAENKFVAECNLRRRIAGLRKQEPADRREAMARTMVLEDFPHSEAYRKKLVARPMMQLDDDIMEAMKKFERMEEVLCSLPGLDCGACGAP…	[FeFe] Group C	[FeFe] Group C1	Sensory	Labile	2	[FeFe]-centre, 2 x [4Fe4S] clusters, PAS domain	Histidine kinase	12.8151	4.50326	0	0	32.501	0.459812	15.8286	4.38288	35.397	31.25	34.904	3.25196	29.5289	4.6587	0	4.30544	20.9838	13.825	13.6087	201.546	0	51.6418	8.59201	0	10.4675	1.61211	8.38618	2.77361	12.8288	0.492503	6.84533	0.924102	0	0	4.2349	0	0.433716	3.09773	0	0	0
WP_008711190.1	METKKYMTIDGLPVEISGEKNILEVIRKAGIKLPTFCYYSELSIYGACRMCMVENKWGGLDAACSTPPKEGMEIWTNTERLRKYRKMILELLLADHCRDCTTCGNNGKCKLQELAMRFNIDGVRFPNGAETPRRDESSLCITRDQNKCILCGDCVRMCNEIQRVGAIDFAGRGSKMTISTVFDIPISESVCVGCGQCAAVCPTGAIVIRNDSAKVWKALDEKETRVSVQIAPAVRVALGKELGIGDGENAMGKIVAALRRMGFNEVFDTSTGADLTVLEESSEFLARLDEGEHEMPLFTSCCPAWVKYAEKNDPDVVSNLSTCRSPMQMFAAVIKEHHKHSPRKQIHVAVMPCTAKKAEAAREEFRTEAGPDVDFVLTTQEIIQMIKESGLVFSELEPE…	[FeFe] Group A3	[FeFe] Group A3	Bifurcating	Labile	3	[FeFe]-centre, 3 x [4Fe4S] clusters, 1 x [2Fe2S] cluster	NADH dehydrogenase, thioredoxin	10.267	3.44544	7.72287	21.7	28.2617	25.2896	6.23553	4.38288	2.29851	20.2206	11.6347	27.6417	4.12031	13.9761	8.86055	2.6909	0	64.9774	22.6812	3.14915	0.454164	9.9073	10.024	7.13046	4.23684	5.37368	8.38618	6.47175	6.41439	6.89504	5.6474	1.38615	0.799931	8.83967	13.7634	5.94992	12.5778	16.2631	0	10.3221	1.28633
WP_028027114.1	MSATRISVDHVARVEGHGDIRVVIEDGAVTTCEMAVVEPARLFESMVLGRSFGEVPYIASRVCGICSASHVVTDLRAIERVFGVGVTDRTEALRELLVYGSYLQNHATHLFVFAAPDFLGHKSVFPLADANPELLERALGLKALGNELCTLVGGRSIHPITAVVGGFTHEIDAGEYRRLAEAMDAARDFALASVDLFRDFDTLDIQTEGDLLAMVAPGAYPVCTSDTARFVEGGYEFSAQAVEEEIEEYAVGHSGAFLARARRTGRPYMTAALARVNASWDALCKDARYVAAKAGLRPPERNPFANNIAQAVELVDVLDRCAALCRRLAADEFSGASAPVPFTVRAGRGVGFTEAPRGALFHLLELNGEGRVTRASIMTPTAQNIANLEADMRQLAEKM…	[NiFe] Group 3b	[NiFe] Group 3b	Bidirectional	Tolerant	4	[NiFe]-centre, 3 x [4Fe4S] clusters	Diaphorase, [FeS] protein	1.18961	0.338515	1.02972	0	0	0.919623	4.79656	2.19144	0.459702	0	0.684393	0	6.18046	0	0.521209	0	0	0.460833	1.51208	1.57458	0.454164	3.96292	2.864	1.78261	0.249226	1.07474	0	0	0.377317	0	0	0.462051	2.39979	0	2.11745	1.18998	0	0	3.87301	3.2596	6.43165
WP_002849014.1	MRSCLTLKKSNCKNCYKCIRYCPVKSIRFSGNQAHIIEQECILCGQCVVVCPQDAKQIVDESEKVRVLLQSGSPVVVSLAPSFIANYDGAGIEQMRDALKKLGFYDVEETAVGATHVKREYERILKEENRDVVISSCCHSVNLLIQKYFPDLLPMLADVISPMQAHCADIKRRIHDAKTVFIGPCVSKKDEAQHYGDTVDAVLTFEELSVWLKEENIEIERGFSADENSRARFFPTAGGILKTMDCDLPDYTYIAIDGIEKCISVLRELEKGSIHKCFIEMSACKGSCIGGPVMENARYTPVEDQMLIARYAGSKDYDVEQPDKLYMKKQFTLIDLGHAQPTEPEIHQILAQMGKFDTSDELNCGSCGYNTCREKAIAIYQGKADISMCLPFLKDKAES…	[FeFe] Group C	[FeFe] Group C3	Sensory	Labile	3	[FeFe]-centre, 2 x [4Fe4S] clusters, PAS domain	Phosphatase, thioredoxin	11.4779	4.45224	7.72287	10.85	40.9795	14.2542	3.35759	5.4786	11.4925	46.875	8.21271	4.87794	14.4211	0	21.8908	0	5.99537	4.1475	1.51208	1.57458	7.26662	11.7649	60.1441	1.78261	31.6517	8.5979	9.78388	8.32082	9.81025	13.2976	2.73813	4.62051	1.59986	1.35995	8.46979	4.75994	6.93946	13.1653	0.86067	42.3748	2.57266
WP_015515272.1	MKTTFITDINKIKFEVNTEVARLAFAGELDEKANEIPYKLIPGRTPHYRCCVYREREIIRERVQLAMGRSAMSGQKNKNIVQVIEAACEGCPINRFNVTNNCQMCMAKKCLGACNFGAIKFEGGHAVIDHKKCKECGKCAEACPYNAIADLMRPCKRSCPVDAITMDEDNIVVINEEKCINCGQCVINCPFGALSDRSFMVDVIKLISSGAPVYAMVAPAIEGQFGPDVSVGMIREAVMKLGFRDMYEVSLGADFVSKNEGQELLEHYEAGEKMTTSCCPAFVSLIKKHYPQVLKYMSTTVSPMTATGRLIKAMHPDAVCVFIGPCIAKKSEVIDSITFGGADYAMTYEELASMFEAKNIDPEECTETMQQGSKFGKQYSVSGGVTAAVLETFKEANKE…	[FeFe] Group B	[FeFe] Group B	Evolving	Labile	1	[FeFe]-centre, 3 x [4Fe4S] clusters, 1 x [2Fe2S] cluster	None	13.7164	5.0886	9.26745	12.4	12.7178	34.0261	30.698	23.0101	17.9284	14.7059	17.1098	9.75588	24.0351	30.2815	14.5939	4.84362	11.9907	21.1983	27.2175	12.5966	5.44996	14.3656	17.184	8.91307	10.2183	12.3595	5.59079	35.1324	18.1112	17.2376	7.52986	3.69641	8.79924	1.01996	4.2349	17.8498	6.07203	13.9398	13.7707	14.1249	14.7928
WP_026485859.1	MPYTHSVTLNKSRCMGCTNCIKRCPTEAIRVRDGKAFILQEKCIDCGECIRVCPYHAKEAVTDTMDVINGYRYKIALPAPTFYSQYKNYSVDRILGALIAIGFDEVFEVAAAAEIVSFYTARILKSEKVKKPVISSACPVVVRLIQIRFPSLIDNILKLESPMEVAAKVAKKLATKKTGLKEEDIGVFFISPCAAKVTSVKNPLGISKSYVNGVLSMQDVYSHTLDVIDRVEDGRQRFSGDVGVGWAVSGGEAYGTGTENCISVDGVQNCIKALEEIEMGKMNDIDFFEGLACTGGCVGGPLTVENCFIAKNRIKRLSGSKRGSPFLKDLLGYIDQEEIKLDKKIEKKDVMKLDSDLFEALRKMEEIDRIYKELPGLDCGSCGAPNCRALAEDIVMGHA…	[FeFe] Group C	[FeFe] Group C1	Sensory	Labile	2	[FeFe]-centre, 2 x [4Fe4S] clusters, PAS domain	Histidine kinase	1.71487	0.415069	0	4.64999	1.41309	0.919623	0	0	0.919403	1.83824	7.52832	0	0	0	1.04242	0	5.99537	0.921666	1.51208	0	0.454164	2.97219	0	1.78261	1.74458	3.22421	1.3977	8.32082	2.2639	9.85006	1.71133	2.31025	0.799931	0	0	0	2.6023	0.774432	0	1.6298	0.643165
WP_022379409.1	MTRSVIDPITRIEGHLRVEMEVENGVVTDAWMSGGCFRGMELVVQDRTPEDAAHIVQRICGVCPVSHAHASSIAAEKAYGIEIPNNARIIRNLIEGGQFLHSHILWFYTLAALDYVNPLNGLNANIADAYDLAQAAGTSMNTDLRALAQRLTTFAENGQMSIFSGNWWKNGAADAEFNLPAELDLICTAHYIEALTMQSKASEICGLLGGKMPHVMTLVPGGTSFVPTEEKLDDLWSLCHELRDWVAATMIPDTKAIAPYYLPALEFGKGCGRYVAWGVFERPSFEMADRYLPSGVIDENLNLSEVNEDLIKEYVGHSWYVGDSDLNPREGVTEPEFTEYYKEGTLFEQNGHEFGEISDRYTWSKAPSYDGKCMEAGPFSRVLAAYLRGNEFIKTNLDQ…	[NiFe] Group 1a	[NiFe] Group 1i	Anaerobic Uptake	Sensitive	3	[NiFe]-centre, 3 x [4Fe4S] clusters	Cytochrome b	0.975741	0.12624	0	5.42499	15.5439	0	0	10.9572	0.919403	11.9485	0	0	0	0	0	0	0	0	0	0	0	0	0	0	0	0	0	0	0	0	0	0	0	0	0	0	0	3.87216	0	0	0
WP_009139152.1	MVGNMEKDACRVQSDASKVCVTIDDIEVSVPRSATVLEAARIAGVDIPTLCYLELYNEIGACRICLVEVEGIDHLVAACNSPVFDGMKVRTDTQRVRSSRKMNLKLILSRHDRRCPTCFRNGTCRLQELADTMGIHEVSFKTSFDESPVDDRYPLVKEPAKCISCLRCVSVCSKVQALSVWGLVDSGSRSRVDAVAKDDCSYCGQCITHCPVGALHERSDVSRVFDAIDDPEITTIAQIAPSVRTSWHEGLGLAKDKASVGRMVAAVKSLGFDYVFDTDFAADVTIMEEGSELLDRLGKGGDGPMFTSCCPGWVRFLKARYPELVSKLSTTKSPQQIFGALAKTYYAKLLGVDPSRLFVVSYMPCVAKKAECAYPGMDAAGTGFDVDAVLTVRELTRQI…	[FeFe] Group A2	[FeFe] Group A2	Evolving	Labile	2	[FeFe]-centre, 3 x [4Fe4S] clusters, 1 x [2Fe2S] cluster	NADH-dependent glutamate synthase	2.90835	1.01059	1.02972	0.774999	2.82617	18.3925	6.23553	7.67005	0.919403	1.83824	1.36879	6.50392	0	0	0.521209	9.68724	0	0.460833	0	0	1.81665	1.36225	7.16001	1.78261	2.49226	19.3453	1.3977	23.1134	1.13195	0	1.88247	4.15846	11.199	0	0	1.18998	0	0.774432	3.01234	2.71633	0
WP_022369673.1	MVNITINGVSLSVPENSTVLQAAKNAGIEIPTLCFLKEYNEIGACRICLVEIKGYDRLAPACNTTVEEGMVINTRSARVIEARRINLQLLMAQHDQNCLSCVRSENCKLQQLCNDENITTQPFEKDFEPFEWNTNWTLIRDASKCVKCMRCVSICDQVQANHAWTIKGTGKRTTVAPSFNTEGAPDMRCALCGQCITHCPTGALTARDDCDKVFDAIADESKTVVVQIAPSVRTAWGSAFGLTPEESDIDLLAAALKQAGVDYVFSTDFSADLTIMEEGSEFLELFTSGKTTEAPLFTSCCPGWVRYVNSHFPQTARHLSTAKSPQQMLGALIKSYFAEQQGIDPETIYSVSIMPCVAKKSECAREDFTDACGDPDVDVVLTTREVGRLLKRKNIDVAN…	[FeFe] Group A2	[FeFe] Group A2	Evolving	Labile	2	[FeFe]-centre, 3 x [4Fe4S] clusters, 1 x [2Fe2S] cluster	NADH-dependent glutamate synthase	1.96651	0.190759	0.514858	0	2.82617	0	0.479656	0	0.459702	0	0	27.6417	0	0	1.04242	2.15272	0	0	0	0	0	20.0623	0	0	0.249226	0	0	0	0	0	0.171133	0	0	0	0	0	42.0705	0.774432	0.430335	0	0
WP_007046798.1	MRGIYTPVTNIRRKVFTEVARMAYEVNEMSDYANLMRELPYKIIPGEEGSLRSSIFLERAIISERIRLAMGLSLRPLDESVPASEGLEHSVIADKYYEPPLINVIKFACNRCPEKIIKVTAMCQGCLAHPCQEVCPKHAISFRNGKSHIDQSLCVKCGRCVNSCPYSAIVKTERPCAAACGMGAIHSDQYGRADIDYDKCVSCGMCLVNCPFGAIVDKGQIFQLVQSIKRGDKVIAIVAPAFINQFPGMTPSKLKEGMRMLGFCDVEEVAIGADLCTIDEAKDFMEEVPSKHPFMGTSCCPAWSVMAKKLFPEYADCISMTMTPMVLTARLIKKDHPDARICFVGPCSAKKLEASRRSVRSEVDFVLTFEELMGLFEAKEVDFASLPNSPEDAFESASA…	[FeFe] Group B	[FeFe] Group B	Evolving	Labile	1	[FeFe]-centre, 2 x [4Fe4S] clusters	None	88.3142	36.6781	217.27	41.8499	56.5234	132.426	101.687	89.8491	86.4239	62.5001	290.183	68.2912	52.1906	153.737	71.4056	12.9163	47.9629	119.356	57.4591	4.72373	39.5122	70.7134	71.6001	71.3046	17.6951	106.399	104.827	83.2082	153.945	71.413	42.7833	68.8456	149.587	83.9769	33.8792	126.733	129.681	203.676	148.035	44.5479	99.6905
WP_018661973.1	MGYTIPIGPYHPSLEEPIHAKLYTEGEVIKDAEVFIGYNHRGIEKLATERNFIQTLTLVERVCGICSHSHPFTYAMAIENIAQMEVPKRGQYIRVIMAELERLHSHYLWIGLACHLIGYDSLFMYVWDAREKVMDILEEISGNRVNYGMVIIGGSRRDINDEMRRKVLKMLDDLNEPHNRMKEIFLNDKTAALRTKGVGVLPKDVAERMGTIGPHARASGIRVDVRKDAPYSCYDEFDFDIPVLEDGDVWARVVVRVLEIEESVKIIRQALENLPEGPINLGNKLPKVPAGEFTARHEAPRGQVIYYVVTDGGQTNYRISIHVPTFKTAPTVPYMLKNNTVADAGLIIASIDPCFSCLDR	[NiFe] Group 4d	[NiFe] Group 4g	Evolving	Sensitive	6	[NiFe]-centre, 1 x [4Fe4S] clusters	NuoL, NuoH, NuoC, [FeS] protein	0.702284	0.212427	0.514858	0	2.82617	6.89717	0.479656	1.09572	0.459702	1.83824	0	0	2.74687	0	1.04242	0	0	0	0	0	0	0.371524	2.864	0	0.996904	1.07474	0	0.924536	0	0	0	1.8482	0	0	0	0	0	1.54886	0	0	0
WP_028027642.1	MVTITLNGRAVEVAEGSTLLEAAVAMGVNIPTLCYLKDLNCIGSCRVCLVEVEGQGLVTACNTAAAEGMVVRTDTPQVAAARRANLQAIMDGHRALCATCVRQDTCALRSLSSAFNVQDADEALPVPEPWDADFPLQRDSSKCIKCMRCVAICDKVQHCGVWDFTGVGPSMKVIVRDNLPIADAGCALCGQCITHCPTGALTARDDVNRIMDAILDPAVETVVQVAPAVRAAWGEGVGLSRAEATPGRLAAALHAVGFDKVFDADFAADLTIMEEGSEFVEFLGSDKPRPMFTSCCPGWVRFVKLHYPQFTAQLSSAKSPHQMMGAVVKNTLAAEAAEAGKRLFVVSIMPCVAKKYECDVPELATEADADVDAVLTVREFNRLLRMVGVNCANLTETPF…	[FeFe] Group A2	[FeFe] Group A2	Evolving	Labile	2	[FeFe]-centre, 3 x [4Fe4S] clusters, 1 x [2Fe2S] cluster	NADH-dependent glutamate synthase	3.34604	1.65021	8.23773	5.42499	0	7.35699	1.43897	4.38288	1.3791	0.919119	1.36879	0	0	0	0.521209	1.07636	0	0	12.0967	0	10.8999	2.84835	1.432	1.78261	0.249226	9.13526	6.28964	0.924536	0.377317	0	7.70099	1.8482	7.19937	0	4.2349	4.75994	7.37318	0.774432	3.01234	0	3.85899
WP_003519061.1	MDNREYMLIDGIPVEINGEKNLLELIRKAGIKLPTFCYHSELSVYGACRMCMVENEWGGLDAACSTPPRAGMSIKTNTERLQKYRKMILELLLANHCRDCTTCNNNGKCKLQDLAMRYNISHIRFPNTASNPDVDDSSLCITRDRSKCILCGDCVRVCNEVQNVGAIDFAYRGSKMTISTVFDKPIFESNCVGCGQCALACPTGAIVVKDDTQKVWKEIYDKNTRVSVQIAPAVRVALGKELGLNDGENAIGKIVAALRRMGFDDIFDTSTGADLTVLEESAELLRRIREGKNDMPLFTSCCPAWVNYCEKFYPELLPHVSTCRSPMQMFASIIKEEYSTSSKRLVHVAVMPCTAKKFEAARKEFKVNGVPNVDYVLTTQELVRMIKESGIVFSELEPE…	[FeFe] Group A3	[FeFe] Group A3	Bifurcating	Labile	3	[FeFe]-centre, 3 x [4Fe4S] clusters, 1 x [2Fe2S] cluster	NADH dehydrogenase, thioredoxin	3.31351	1.16349	3.08915	2.325	14.1309	3.21868	1.91862	4.38288	1.3791	9.19119	6.84393	3.25196	5.49374	2.32935	2.60604	2.15272	0	6.45166	4.53625	0	0.454164	10.7742	7.16001	3.56523	0.996904	3.22421	0.698849	1.84907	4.52781	1.97001	2.567	1.8482	0	1.35995	3.17617	2.37997	2.16858	7.74432	0.430335	5.97593	5.78848
WP_008860581.1	MAEITTVPFGPQHPVLPEPIHLDLELKDEKVVRAVPSIGYVHRGLEKLVEKRDFKQFIYVAERVCGICSFGHGWGYAKAVEGLMNIEIPERASCLRTMWHELSRLHSHLLWFGLAADAMGFESLFMNAWRIREIVLDIFEETTGGRVIFSVCKIGGVRRDINDTQRKEILEKMKELRKEIQQMAMVFLYDNTIQSRLEGVGVLSMNDAMDMGCVGPMARASGLPVDYRMAEDEGFYKKLHFHPVTETAGDCLARVKVRLGELTQSIDLICGCLELLPEGAIEAPVRGLPPAGEYFTRVEQPRGEALYYVKGNGTKNLERFRLRTPTNVNLAALVKMLKGCELADVPNIILTIDPCISCCER	[NiFe] Group 4e	[NiFe] Group 4e	Evolving	Sensitive	6	[NiFe]-centre, 1 x [4Fe4S] clusters	NuoL, NuoH, NuoC, [FeS] protein	2.47555	0.0949888	0	0	0	0	0	0	0	0	0	0	0	0	0	0	0	0	0	0	0	0.123841	38.6641	90.9133	0	0	0	0.924536	0	0	0	0	0	0	0	0	0	0	0	0	0
WP_022379545.1	MGKAQVIPFGPQHPVLPEPVHLDLVVQDETVVDVLPQIGFIHRGLEKLVETRDIHQYIYVAERICGICAFGHSYGYAQAVETLMGAEVPKRAEYLRTIMHELSRIHSHLLWMGLAADAFGYESLFMHTWRLRERILDIFEAVAGGRVILSYTLLGGVTKDIDAPMLASIKDTLKGLGKEYGEICNAFLKDSSVKNRTVGIGVIDEEHAYEYGMVGPFARASNVNNDVRCLGIGGYGELSSFEPIMETAGDCYARVKVRALEVLQSIEIINELIDKIPDGPVHIPVKGAPADGSEACNILEQPRGEVFYYCSGNGTKNLERMRIRTPTSQNLAGMTMALKGCEIADVNMIVLSIDPCISCTER	[NiFe] Group 4e	[NiFe] Group 4e	Evolving	Sensitive	6	[NiFe]-centre, 1 x [4Fe4S] clusters	NuoL, NuoH, NuoC, [FeS] protein	0.754077	0.0834537	0	2.325	5.65234	0	0	14.2444	0	8.27207	0	1.62598	0	0	0	0	0	0	0	0	0	0	0	0	0	0	0	0	0	0	0	0	0	0	0	0	0	7.74432	0	0	0
WP_002848990.1	MKNKRVFDTKVQYLKYKVLREVAREAWDDTLLEDLLDIPKKIVSGKTPTMRCCVYKERAIIAERVKIAMGGDKENPNVIEVIDIACDECPAAGYEVTDSCRGCLAHRCEDVCPRGAISFDHNHVAHIDKSKCVECGRCSKVCPYSAITNRVRPCQNACKIKAISINEDGGAAIDNEKCISCGACVYQCPFGAITDKSFILDVIDMIKKNSRDKKSKLYAVVAPSISSQFTYAKLGQVVSGLKTLGFHAVVEAALGADMVAYSESKELVEKGFLTSSCCPAFVSYVKSAFPELTEHISHNPSPMAAIAKYIKDIEPSAKVVFIGPCTAKKAEAQLKEVKAYVDSVLTFEELQALFDSRDLDITQLEEEALDNASYFGRIFARSGGLSDAVAEAIKEQGIE…	[FeFe] Group B	[FeFe] Group B	Evolving	Labile	1	[FeFe]-centre, 3 x [4Fe4S] clusters, 1 x [2Fe2S] cluster	None	8.45904	3.2782	7.20801	6.97499	16.957	16.0934	3.83725	4.38288	5.05672	30.3309	13.6879	3.25196	10.9875	0	11.4666	0	8.99305	4.1475	1.51208	0	0.908327	6.19207	27.208	0	17.9443	6.98579	4.19309	8.32082	11.3195	12.3126	0.855666	6.00666	2.39979	1.01996	2.11745	0.594992	5.2046	9.29319	2.15167	28.2499	0.643165
WP_007209903.1	MAFTNNIMIVRHRLLTELVKLWRDNELVEKIDRLPIELSPRRSKHAGRCCVHKERAVWKYKSLPLLGLDMEDEKDELTPLSEYAAHALDRAENGTPKDNIMCVIDEACSACVQINYEITNLCRGCTARSCQTNCPKKAVHVKESGQAWIDHDECISCGICHKSCPYHAIVYIPVPCEEACPVKAISKDKKGIEHIDESKCIYCGKCLNACPFGAIFEVSQVFDILHKIRKGEKIVAIVAPSILGQFKTTIEQVYGALKAVGFTDVIEVAQGAMDTVSNEAHELIEKLEEGQKFMTTSCCPSYIELVNKHIPGMKPYVSGTGSPMYYAARIAKEKHPDAKVVFIGPCVAKRKEAQRDEAVDFVMTFEEVASVLDGLNIQLEQSQPYAMSFASVREAHGFA…	[FeFe] Group B	[FeFe] Group B	Evolving	Labile	1	[FeFe]-centre, 3 x [4Fe4S] clusters, 1 x [2Fe2S] cluster	None	1.87683	1.01166	0	0	1.41309	1.83925	0	0	0	0	2.05318	4.87794	19.9148	0	0	0	0	0	0	0	0	2.60067	0	0	0	1.07474	0	0	1.88659	0	0	0	0	0	0	0	0	0	0	0	0
WP_008371804.1	MGYMTIDGRKVEFTDEPNVLSVIRNADIDIPTLCYHSELSVYGACRLCTVEDERGKTFASCSEPPRDGMVIYTNTPRLMKYRKMILELLLAAHCRDCTTCIKSGECQLQALAHRMGVTTVRFENTKEQYPLDFSSPSIVRDPNKCILCGDCVRMCDNVQSVNAIDFAYRGTKALVTPAFNKKIAETDCVNCGQCRVVCPTGAISINTNIEVIWDFLADKNTKVIAQIAPAVRVAVGDQFGLPRGENVMGKLVNVLHRLGFDEVYDTSYGADLTVIEESEELLERLASGENLPLFTSCCPAWVKFCENRYPDLAKNLSTCRSPQQMFGAVIREYYKDPEKNGGKRIVSVSIMPCTAKKEEILRPESSTNGKQDIDYVLTTTELITMIRKSGIRFENLEIE…	[FeFe] Group A3	[FeFe] Group A3	Bifurcating	Labile	3	[FeFe]-centre, 3 x [4Fe4S] clusters, 1 x [2Fe2S] cluster	NADH dehydrogenase, thioredoxin	44.3386	30.0118	59.2087	38.7499	21.1963	60.6951	44.608	42.7331	76.7702	28.4927	37.6416	39.0235	4.80702	79.1978	29.1877	14.5309	26.9792	5.06916	1.51208	37.7898	54.9538	30.8365	57.2801	57.0436	27.1656	62.3347	28.6528	1.84907	41.8822	83.7255	39.874	50.3635	79.9931	61.1977	85.7566	61.2842	75.9004	24.0074	68.8536	10.3221	62.387
WP_014357048.1	MKEITFKINGQEMIVPEGTTILEAARMNNIDIPTLCYLKDINEIGACRMCLVEIAGARALQAACVYPVANGIEVLTNSPKVREARRVNLELILSNHNRECTTCIRSENCELQTLATDLGVSDIPFEGEKSGKLIDDLSTSVVRDESKCILCKRCVSVCRDVQSVAVLGTVGRGFTSQVQPVFNKSLADVGCINCGQCIINCPVGALKEKSDIQRVWDAIADPSKTVIVQTAPAVRAALGEEFGYPMGTSVTGKMAAALRRLGFDKVFDTDFGADVCIMEEGTELIGRVTNGGVLPMITSCSPGWIKFIETYYPEAIPHLSSCKSPQNITGALLKNHYAQTNNIDPKDMVVVSIMPCTAKKYEVQREELCTDGNADVDISITTRELARMIKEARILFNKL…	[FeFe] Group A3	[FeFe] Group A3	Bifurcating	Labile	4	[FeFe]-centre, 3 x [4Fe4S] clusters, 1 x [2Fe2S] cluster	NADH dehydrogenase, thioredoxin, thioredoxin	1.74898	1.14047	2.05943	1.55	7.06543	4.59812	3.83725	2.19144	0.919403	1.83824	3.42196	0	2.06015	0	2.08484	0.53818	0	1.84333	0	0	0	0.866889	4.29601	0	2.74149	4.83632	2.09655	0	1.13195	0.985006	0.342266	2.7723	1.59986	0.339987	0	2.37997	0.867433	3.87216	0	4.8894	0
WP_010250212.1	MNSKQYMTIDGIPVEINGEKNLLELIRKVGIKLPTFCYHSELSIYGACRMCMIENEWGGLDAACSTPPKAGMNIKTNTARLQKYRKMILELLLANHCRDCTTCSNNGKCKLQDLAMRYNINSVRFPNTASEPMVDDSSLCITRDQNKCILCGDCVRVCNEVQNVGAIDFGYRGSKMKICTAFDKPIAQSNCVGCGQCALACPTGAIVIKNNTDKVWKEIYDNNTKVTVQIAPAVRVALGKELGLNDGENAIGRIVAALRRMGFDEIYDTSTGADLTVLEESAELLKRIKDGNNDMPLFTSCCPAWVNFCEKHYPELLPNVSTCRSPMQMFASVIKEQNSNSSRRVVHVAVMPCTAKKFEAAREEFKVNGVPNVDYVISTQELIQMIKESGIIFTDLEPE…	[FeFe] Group A3	[FeFe] Group A3	Bifurcating	Labile	3	[FeFe]-centre, 3 x [4Fe4S] clusters, 1 x [2Fe2S] cluster	NADH dehydrogenase, thioredoxin	5.87738	2.23145	5.14858	6.97499	8.47851	14.714	6.23553	1.09572	0.459702	10.1103	6.15953	6.50392	1.37344	2.32935	3.12725	1.07636	0	37.7883	13.6087	0	0	21.4245	4.29601	1.78261	0.498452	10.21	2.09655	1.84907	5.65976	0.985006	4.44946	2.31025	0	4.41984	9.52852	6.54492	9.54176	6.96989	0.86067	7.06247	12.8633
WP_009145651.1	MMQMVNLTIDGKQIQAPAGSSVLEAARSAGIYIPTLCYHPDLRPEGACRLCMVEASGARTLVASCVYPVSEGMVVKTNTSKVREARKTVLELLLTNHPKDCLCCQKNGDCELQKIAADLGVRKLRFEGGETRARTIDNSNPSLVRDQEKCILCGRCIRVCRDVQGMSVYSFAGRGFNTMVSTAFEHDLLNSACTYCGQCADVCPTGAIVEKDDTDKVWAAINNPEKVVVVQTAPSVRVALGEELGIPAGQVVTGKMVAALRHLGFDKVFDTNFSADLTIMEEGHEFLQRLQNGGVLPMITSCSPGWVNMIELKYPELLPHLSTAKSPQQMFGAVAKTYFAERAGIDPAKIVSVSVMPCTAKKAEAAREEMCASGYRDVDVVITTRELGRMIREAGIDFN…	[FeFe] Group A3	[FeFe] Group A3	Bifurcating	Labile	3	[FeFe]-centre, 3 x [4Fe4S] clusters, 1 x [2Fe2S] cluster	NADH dehydrogenase, thioredoxin	24.5912	16.8765	2.05943	4.64999	76.3066	7.8168	12.4711	13.1487	55.1642	107.537	36.9572	8.1299	81.7194	6.98804	2.08484	14.5309	26.9792	42.3966	51.4108	275.551	0.454164	67.6174	12.888	3.56523	27.6641	13.9716	19.5678	24.0379	22.2617	0.492503	20.0226	4.15846	0	1.35995	13.7634	3.56995	2.16858	13.1653	0	2.17307	2.57266
WP_017416926.1	MNGQFMLIDNMPVEINGEKNVLELVRKAGIDLPTFCYYSELSVYGACRMCMVENKWGEIEAACSTPPKAGMEVYTNTPRLRKYRKMILELLLSHHCRDCTTCEKNGYCKLQDLAQRFGIKEIRFNNTSEEPALDKSSVSIVRDKSKCILCGDCVRMCDEVQNVGAIDFVGRGSEMTVSTAYDEPLAESNCVGCGQCAAVCPTGALVIKNDTSKLWKELSDKDTKVVVQIAPAVRVGISKELGCKDGENVMGKIVGALRKMGFNAVFDTSTGADLTVLEETGEFLARLEKNEKLPLFTSCCPAWVSYAENTHPDLLTNISTCRSPMQMFSSVLKEHYKHSSKKVVVVAIMPCTAKKFEAQRDEFKEDGIPYVDYVITTQELIQMIKESGIVFSEVEPEAV…	[FeFe] Group A3	[FeFe] Group A3	Bifurcating	Labile	3	[FeFe]-centre, 3 x [4Fe4S] clusters, 1 x [2Fe2S] cluster	NADH dehydrogenase, thioredoxin	7.20642	2.80528	5.66344	17.05	24.0225	12.8747	8.63381	5.4786	3.67761	15.625	2.05318	13.0078	11.6742	2.32935	6.77572	0	2.99768	25.3458	15.1208	0	1.81665	3.96292	5.72801	24.9566	3.48917	13.4342	5.59079	1.84907	4.52781	1.97001	3.0804	5.54461	0	3.39987	5.29362	4.16495	5.63831	12.3909	2.58201	10.3221	1.28633
WP_023162310.1	MSGQFMIIDNIPVEINGEKNILELIRKAGIDLPTFCYHSELSVYGACRMCMVEDKRGRMQAACSTPPQAGIEIYTNTPRLRKYRKNILELLLANHCRDCTTCEKNEHCKLQDLAKRFKIKKVRFKNTSINKKIDNSSVCIVRNRSKCILCGDCVRVCEEVQNVGAIDFVKRGSNMTVTTAFDEPIANSNCVGCGQCAAVCPTGAIVVKDDTAELWEALSDKNTKVVAQIAPAVRVGLNEELGEENGENEMGKIVAALRRMGFDEVFDTSTAADLTVLEETAEFTSRLEKNESLPLFTSCCSAWVNYVENTHPELMKYVSTCKSPMEMFASVLKEYYKNSDKKIVVVAVMPCTAKKYEAKREEFSKNGVPDVDYVITTQELISMIRQAGIVFPELEPEAV…	[FeFe] Group A3	[FeFe] Group A3	Bifurcating	Labile	3	[FeFe]-centre, 3 x [4Fe4S] clusters, 1 x [2Fe2S] cluster	NADH dehydrogenase, thioredoxin	4.5486	1.86168	3.60401	5.42499	18.3701	11.4953	1.43897	3.28716	3.21791	9.19119	9.5815	4.87794	5.49374	2.32935	9.90297	0.53818	0	14.7467	10.5846	0	0	6.81127	7.16001	3.56523	1.24613	5.91105	4.19309	0.924536	7.16903	0	2.0536	0.462051	0	3.39987	4.2349	4.16495	2.6023	9.29319	0	10.8653	1.28633
WP_027399804.1	MSQNYMIINGEKVPYTDERNILEVVRKAGIDLPTFCYYSDLSIYGACRMCIVEDNRGGIITSCSTPPKNGMEIKTNTPKLHKHRKLILKLLLSSHCRECTTCSKSGDCRLQDLARRFGIQQIKFDKTQKAYKDEYTIDRSSPSITRDPNKCIQCGDCVRMCSENQNVGAIDFALRGYELMVCPAFDDPIAETDCVNCGQCAAVCPTAAIVVNNQVEEAWKAIYDKNKRVVVQIAPAVRVALGEEFDLPPGESVMPLIVAAMRKIGFDEIYDTSFSADLTVIEESNEFLEKLKSGAKLPLFTSCCPGWIKYVENRHPDLLPQISSCKSPMGMFSSVFKEYASKPENKMDDRETFVIAIMPCTAKKYEASREEFKTNGKVDGKYDTDLVLTTQELANMIWE…	[FeFe] Group A3	[FeFe] Group A3	Bifurcating	Labile	3	[FeFe]-centre, 3 x [4Fe4S] clusters, 1 x [2Fe2S] cluster	NADH dehydrogenase, thioredoxin	4.34013	1.70266	6.1783	1.55	7.06543	1.83925	1.43897	3.28716	9.19403	3.67647	2.73757	3.25196	4.12031	4.6587	8.86055	1.61454	5.99537	4.60833	0	0	9.53744	4.08676	5.72801	32.087	11.4644	7.52316	6.28964	1.84907	4.90513	2.95502	1.71133	7.39281	1.59986	0	8.46979	1.18998	0.433716	4.64659	1.72134	1.6298	1.92949
WP_015539897.1	MTRSVIDPITRIEGHLRVEMEVTNGKVSDAWVSGGCFRGMEMVVENRTPEDAAQIVQRICGVCPVSHAHSSAIAAEKAYGIKISNNARIIRNLLEGAQFLHSHILWFYNLAALDYVNPLNALKADAADAYDLAQAAGTSTNSDFVALKERLSNFADNGQLSIFSGNWFDAEDGTGYKLPPELDLICTAHYLEALQMQAKASQVSAIIGGKMPHVMTLIPGGTAFVPTDQKLDDLKYLVDEIYDWVEATMIPDTLAIAPYYIDALNWGKGCGRYVAWGVFENESMELKDRYLPMGVIDDKLNLSDVKEELITEYMGHSWYKGEETYTSPYFVTEPEFTSYDVNDRYTWVKCPAYDGKPYEAGGLSRVLAAYKRNVPFIVEQVDGLLEALGAPGQIGVAQS…	[NiFe] Group 1a	[NiFe] Group 1i	Anaerobic Uptake	Sensitive	3	[NiFe]-centre, 3 x [4Fe4S] clusters	Cytochrome b	6.05858	2.60223	9.26745	1.55	1.41309	13.3345	8.15415	8.76577	6.89552	0.919119	0.684393	1.62598	23.3484	0	3.12725	0	5.99537	3.68666	7.56041	1.57458	5.44996	11.5172	12.888	14.2609	2.24303	2.68684	1.3977	16.6416	2.64122	3.44752	2.567	4.15846	4.79958	2.03992	5.29362	0.594992	4.77088	11.6165	5.16402	6.5192	19.2949
WP_022387742.1	MVTITIDGNVCEVPANTTILEAAASVGIKIPTLCYLKDLNEVGGCRVCVVEVEGAEHLVAACNNTVLDGMVVHTNTPKVRAARMTNVELLLSQHDSSCTSCVRSGNCTLQTVANDLGIYRLPYKKHVEHNSWDRTFPLIRDNEKCIRCLRCIQVCEKVQGLGVWDLTNRASHASVDVRGRKPITEVDCAACGQCITHCPVGALRERDDTERVFDAMADPNKVVMFQIAPAVRTSWGEELGLSREEATVERLCSLLHAMGASYVFDTDFSADLTIMEEGSELLHRIAEHDAGGEDVPALPLMTSCCPGWVRYVKARYPQFVSQVSTSKSPQQMFGAMAKTHYADVLGVEAKDVFCVSVMPCVAKKTEAALPTMVGESGDPDVDVALTVREVVRMIRASHM…	[FeFe] Group A2	[FeFe] Group A2	Evolving	Labile	2	[FeFe]-centre, 3 x [4Fe4S] clusters, 1 x [2Fe2S] cluster	NADH-dependent glutamate synthase	5.35353	2.20943	1.02972	4.64999	2.82617	1.37943	4.3169	5.4786	9.19403	0	0.684393	0	3.43359	0	6.77572	8.0727	2.99768	2.30416	4.53625	0	0.454164	1.60994	8.59201	3.56523	1.24613	5.91105	2.09655	2.77361	19.2432	1.47751	2.0536	2.31025	43.1962	2.7199	1.05872	1.18998	0.433716	12.3909	65.8412	3.2596	0
WP_009141594.1	MSNSMRGVYTSLAQIRRTVFREVARLAYESQSGDYGWVDELPYEIIPGDVATYRESVFLERAIVGERIRLAMGLPLQGVDKPAKLSEGVAEAAKPETYYQPPLINVIKFACNACEENSYKVSDACQGCLAHPCREICPKGAITFKDKKAYIDQEKCIKCGRCANVCPYGAIQHHARPCAVACGMNAISSDEQGRAQIDYSKCVSCGQCLVNCPFGAIADKSQIFQVIQAILAGEEVIAEVAPAFVGQFGGKGNVDKLREAFKALGFTGMEEVALGADLCAVQEAEDFLEEVPDKIPFMGTSCCPAWSVMAKMEFPEHADCVSMALTPMTLTARLIRKQHPNAKIVFVGPCSAKKLEAQRKSVKSEVDFVLTFEEMAGMMEAKDIDYTRLAGEGSSDFEV…	[FeFe] Group B	[FeFe] Group B	Evolving	Labile	1	[FeFe]-centre, 2 x [4Fe4S] clusters	None	5.39137	3.51356	1.54457	3.09999	1.41309	1.83925	1.91862	9.86149	10.5731	1.83824	2.73757	6.50392	9.61405	0	5.7333	0	2.99768	1.84333	22.6812	0	0.908327	2.60067	4.29601	5.34784	7.22756	4.29895	0.698849	0.924536	13.2061	3.44752	1.88247	2.31025	34.397	1.69994	2.11745	4.75994	2.16858	17.0375	35.7178	10.3221	2.57266
WP_009138996.1	MGKATVIPFGPQHPVLPEPLHLDLVVEDEHVIEAIPQIGFIHRGLEKLVETRDIHQFIYVAERICGICSFGHSLGYAETVEDLMGVEVPKRAQFIRVILHELSRMHSHLLWMGLAADAFGFESLFMHCWRLRERVLDIFEATTGGRVILSAVCIGGVNRDIENTELKAIVDKLNGIKDEYREITNTFLKDTSVKSRLVGIGHLTKEQAEDLCMVGPFARASNVAYDCRMLGRGAYGDLEGFEPILSDEGDCYARCKVRALEVSQSIDIIEELVSKIPDDGIGSKSKLTPPEGAQASSVLEQPRGECYYYARGNGTKNLDRMRMRTPTSQNLAGMVKALEGCDLADVPMIILTIDPCISCSER	[NiFe] Group 4e	[NiFe] Group 4e	Evolving	Sensitive	6	[NiFe]-centre, 1 x [4Fe4S] clusters	NuoL, NuoH, NuoC, [FeS] protein	1.58417	0.457791	0	0	0	11.0355	0	4.38288	0.459702	0	0	4.87794	0	0	0	5.91998	0	0	0	1.57458	0	0	4.29601	3.56523	0	12.3595	0	6.47175	0.377317	0	0	2.7723	0	0	0	0	0	0	7.31569	0	6.43165
WP_012798421.1	MTRSVIDPITRIEGHLRAEMEVTNGVVTDAWVSGGSFRGMELVVRNRRPEDAAQIVQRICGVCPVSHAHASTIAAERAYGITIPNNARIIRNMLEGAQFLHSHILWFYNLAGLDYVNPINALKAKIGDTYDLAEQLGTEGADFAGLQDRLKAFADNGQLSIFSGNWFDTGEYNLTPEADLILTAHYLEALEMQAAASRISGILGGKMPHVMTLVPGGTMFVPTAENLDDLKGLIDKIYNWVYATLLPDTLAVAQFYPEAATFGQGVGRYGAWGVFEAPSFEYNERYLPAGILEADGTLNDIDESKITEYVGHSWYEGDKDLPPFEQGVHPAYTEYNVEDRYTWNKCPRYDGKPLEAGGLSRLLVAYKRGVPFVVEYVDQVITALGGKKGDYSILQNTLG…	[NiFe] Group 1a	[NiFe] Group 1i	Anaerobic Uptake	Sensitive	3	[NiFe]-centre, 3 x [4Fe4S] clusters	Cytochrome b	0.600637	0.0297257	0	0	1.41309	0	0.479656	0	2.75821	0	1.36879	1.62598	0	0	0.521209	0	0	0.460833	0	0	0.454164	0.619207	2.864	1.78261	0.249226	3.22421	0	0	0	0	0	0	0.799931	0	0	0	0	1.54886	2.58201	0.543267	5.14532
WP_010250208.1	MTEYLVTKNSNCKNCYKCIRHCPVKSLKFTDGQAHIVKDECVLCGECYVVCPQNAKQIRQDVEKAKQLISENDVYVSLAPSFVAWFHDKSIYDMEQALKKLGFKGADETAKGAFIVKKQYEKMIEEKRSKVIISSCCHSVNTLIQRHYTDAIPYLADVISPMLAHAQLIKKEHAGCKVAFIGPCISKKEEAEKYEGFVDVTLTFDELEEWLGMENIAIESTGTESEKGRTKSFPRSGGIIDSMDKNENYHYLVVDGMENCINALDNIDKGELDNCFIEMSACRGSCINGPVLKRKNHNIIGAILAVNENTGANDYTIAMPDRKSLKKEIRLEGVKKIMPGSSAIEEILKKMGKTSKEQELNCGSCGYDTCRDKAMAVLTGKADLTMCLPYLKEKAESFS…	[FeFe] Group C	[FeFe] Group C3	Sensory	Labile	3	[FeFe]-centre, 2 x [4Fe4S] clusters, PAS domain	Phosphatase, thioredoxin	5.7897	2.338	6.69316	11.625	2.82617	10.5757	2.87794	2.19144	0.459702	7.35295	4.79075	1.62598	0	0	2.60604	0	14.9884	8.29499	0	0	4.54164	12.8795	4.29601	1.78261	2.99071	7.52316	7.68734	9.24536	6.41439	7.88005	3.25153	6.93076	0	0	2.11745	2.97496	1.73487	4.64659	2.15167	8.69227	0.643165
WP_029502586.1	MAKYMIIDGNRVEFNDEPNILALVRKAGIDLPTFCYYSDLSIYGACRMCVVEDQWGGIIASCSTPPKDKMEVKTNTPKLHQHRKMILELLLAAHCRDCTVCDKNGKCRLQELALRFGIKTVRFENKTEEMELDTSSTSIIRDPGKCILCGDCVRMCHEIQNVGAIDFAHRGAKMVVSPAFNKKIAETNCVNCGQCAAVCPTAAITVKSDLKEVWKAIYNPKKRVVVQVAPAVRVALGEEFHMKAGENVIGKIVAALRRLGFDAIFDTTVGADLTIMEESKELLKKLESGDSKYPLFTSCCPGWIRYAETQHKELLPYISTCKSPMEMFGAVIKEHFKGLDSSEGVETISVAIMPCTAKKFEASREEFKRNNVPDVDYVITTIELVKMIKEIGIQFEELD…	[FeFe] Group A3	[FeFe] Group A3	Bifurcating	Labile	3	[FeFe]-centre, 3 x [4Fe4S] clusters, 1 x [2Fe2S] cluster	NADH dehydrogenase, thioredoxin	10.2114	4.38665	10.2972	5.42499	26.8486	8.27661	6.23553	4.38288	21.606	6.43383	6.84393	3.25196	2.74687	9.31739	34.3998	59.1998	14.9884	14.7467	15.1208	0	15.4416	14.4894	15.752	3.56523	6.97833	6.98579	13.977	2.77361	5.28244	6.89504	4.96286	11.5513	3.99965	0.679975	19.057	5.94992	0.867433	23.233	1.72134	14.1249	3.21582
WP_007156182.1	MQMVNCTIDGKKVCVPEHTTILEAAKEIGVYIPTLCYFKDLNEIGACRVCVVEVEGDQRLHAACNSPVLEGMVVHTNSKKAREARKCNVELILSQHNVTCTTCVRSGNCALQHVANDLNIMGESFPKDLPKQKGSKSFPLIREYDKCIKCMRCIQVCDKIQATHVWDVINSGGKSTVDVRDFYRLEDSPCSLCGQCITHCPVGALRERDDTDKVLDALDDPETIVLAQIAPSIRTAWGEEFGLDAEEASVQRLASCLKEVGFDYVFDTDFAADLTIMEEASEFLHKLTHQEGDFPMFTSCCPGWVRFIKSHYPEYIPQVSTSKSPQQMFGAIAKSYYADILKVSPKKIFSVSIMPCLAKKAECSYPNMTDSEGNFDVDVALTTREVNRLIRAMHISPKK…	[FeFe] Group A2	[FeFe] Group A2	Evolving	Labile	2	[FeFe]-centre, 3 x [4Fe4S] clusters, 1 x [2Fe2S] cluster	NADH-dependent glutamate synthase	3.26536	1.46594	6.1783	3.87499	7.06543	3.67849	1.91862	1.09572	3.21791	7.35295	2.05318	1.62598	4.80702	0	1.56363	2.6909	2.99768	0.921666	1.51208	1.57458	0.454164	4.95365	22.912	0	11.7136	9.67263	2.09655	0	3.01854	1.47751	1.19793	1.38615	0	0.679975	1.05872	1.18998	0.433716	4.64659	0	11.4086	0
WP_018660435.1	MEMVKLTIDGIEVEVPRGTTVIEAARQIGINIPSLCYLKGVSHTSSCRVCVVEVGPRLIASCTLPCENGMEVKTNTPKVREARRTVVELLLSNHKRECTSCNRSENCELQTLAKELNIRDLRFEGERISYEIDNSSPSLVRDQEKCVLCGRCINTCKNVQTVGAIDFSRRGFNTRVSTALDKNIADTVCVNCGQCIMACPVGALTEKENIKEVWKALADPEKFVVVQTAPAVRVALGEEFGMPIGTRVTGKMAAALRRLGFDKVFDTDFAADLTIMEEGTELLTRLEKGERLPLMTSCCPGWVKFVEHFYPELIDNLSTCKSPHEMEGALIKHYLAEKLGVDKKNVVVVSIMPCVAKKFEGQREELSNENLQDVDYVLTTRELAQMIKEAGIDFTKLPD…	[FeFe] Group A3	[FeFe] Group A3	Bifurcating	Labile	4	[FeFe]-centre, 3 x [4Fe4S] clusters, 1 x [2Fe2S] cluster	NADH dehydrogenase, thioredoxin, thioredoxin	2.8867	1.06101	0	6.97499	4.23926	9.19623	0.959312	1.09572	1.83881	4.59559	3.42196	1.62598	4.80702	0	1.04242	0	2.99768	1.84333	0	0	2.27082	5.20133	4.29601	1.78261	5.98143	3.22421	2.79539	10.1699	1.50927	2.95502	1.5402	0.924102	0.799931	0.339987	0	2.37997	0.433716	2.3233	0.430335	9.23553	0
WP_027199847.1	MNENITLKIDNREISVPKGTTILEAARELGIDIPTLCYMNLKDLCIKNAPASCRICVVEVDGRKNLAPSCATRCENGMNVHTNTMRVLNARRTVLELMLSDHPSDCLVCAKSGSCELQAVAIKLGIREIPFQGTQTEYKVDLSPSIRRDATKCIYCRRCEMMCNDIQTVGALGAVNRGFDSVVMPAFDQALQDSECTFCGQCVAVCPVGALTELDHTNRLIKDLANPDKTVIVQTAPAVRAALGEEFGLPAGTSVTGKMVAALRKLGFAKVFDTDFAADLTIMEEGTELLGRLTAFLNGDKDVKLPIITSCCPGWVNFFEKQFPDLLDNPSSARSPQQMFGAIAKTYWAEKMGIKREDLIVVSVMPCLAKKFESERDEFRTNGDPDVNYSISTRELAAL…	[FeFe] Group A3	[FeFe] Group A3	Bifurcating	Labile	3	[FeFe]-centre, 3 x [4Fe4S] clusters, 1 x [2Fe2S] cluster	NADH dehydrogenase, thioredoxin	1.19321	0.322541	1.02972	0	1.41309	1.83925	0	0	0	1.83824	0	1.62598	2.06015	0	1.56363	0	0	0.460833	0	0	0	5.44902	1.432	0	0.498452	0	0	0	0.754635	0	0	0.462051	0	0	0	0	0	1.54886	0	1.6298	0
WP_013656601.1	MSGQFMLIDGMPVEINGEKNILELIRKAGIELPTFCYYSELSVYGACRLCVIENQWGGIEASCSTPPKAGMEIYTNTPRLRKYRKMILELILANHCRDCTTCEKNGDCKLQELAMRFGINQVRFKNSKKEVPLDTSSRAIVRDESKCILCGDCVRMCDEMQNIGAIDFAHRGTNMRISTAFHKPISESKCVSCGQCAAVCPTGAIVVKNDTQAIWNVISDPETKVIVQIAPAVRVGIDQSLGEENGHNVMGKIIAALRRMGFDEIFDTTTGADLTVLEEANELLERIERKDTLPLFTSCCPAWVKYVENNHPELISQVSSCRSPMEMFGAVLKEHYSHSRRKVIVVAVMPCTAKKEEAARDELKRDGIPDVDYVLTTRELIQMVKESGIVFNELEPEAV…	[FeFe] Group A3	[FeFe] Group A3	Bifurcating	Labile	3	[FeFe]-centre, 3 x [4Fe4S] clusters, 1 x [2Fe2S] cluster	NADH dehydrogenase, thioredoxin	6.46611	6.33611	6.69316	9.29998	15.5439	17.013	6.71518	1.09572	3.21791	6.43383	7.52832	11.3819	6.18046	2.32935	7.29693	3.22908	8.99305	34.1016	13.6087	0	1.81665	4.82981	4.29601	0	3.23994	4.29895	5.59079	6.47175	10.9422	0.492503	3.0804	4.62051	0	4.75982	5.29362	5.35493	13.4452	13.1653	2.15167	7.06247	0.643165
WP_006008218.1	MSQVMKTPQSNFSGPIVVDPLTRIEGHLRIEVEVENGRIKDARSCGTLYRGLEVILKGRDPRDAQHFTQRTCGVCTYTHALASTRALEDAMGLTLPANATYIRNLVLGLLFMHDHMVHFYHLHALDFVDVTAALKADPAKAAALASSISPRKATADDFKAVQARLKAFVDSGQLGPFTNAYFLGGHPAYYLDPEANLVATAHYLEALRVQVSAAKAMAVFGAKNPHPQFLIPGGVTCYESLTPERIKEFRDLYLQARKFIEEVYIPDLLLVAGAYKDWAALGCGCRNFMAFGEFPEVGGERDITKRWLKPGVLLDGKLDTVHPFDAGKIAEHVRHSWYEGEEARAPYDGETKPAFTRMGDTDRYSWLKAPRYDGLAMETGPLAQMLVSYAQGHEAVKPA…	[NiFe] Group 1b	[NiFe] Group 1b	Anaerobic Uptake	Sensitive	3	[NiFe]-centre, 2 x [4Fe4S] clusters, 1 x [3Fe4S] cluster	Cytochrome	1.95844	0.778742	0	0	39.5664	0	0	0	0.459702	1.83824	0	3.25196	0	0	4.69088	0	0	0	0	0	0	32.6941	1.432	0	0	0	1.3977	0	0	1.47751	0.342266	0	0	0	0	0	0	0	0	0	0
WP_006234109.1	MAEPEKKDYARRCESHVEALRAAVPGAIEKVEWQCEDQLTITVKQDKLPEAVHYLYYERYGWIPVIIGNDERSLCGRYAVYYVISMEGEDPGWVTVRTEVDPAKMTFPSVTPFVPACVWGERELRDMFGLIPEGLPDRRRLVLPDDWPSGLYPLRKDSMDYRFRPAPASDMENYEFLADTKGKETTLVPMGPLHITSDEPGHFRLFVEGETIVDADYRLFYVHRGMEKVAETRLNYDAVTFLADRICGICGCAHSVAYAEAVERAQGIHVPPRAQYIRAIMLEVERLHSHLLNIGLASHYTGFDSGFQQFFRVREKSMDLAEKLSGHRKTYGLNVIGGVRRDILAEQKLSTLTTIHQLRSEVQELVDVLLSTPNFIERTSGIGILDRKIARDFSPVGPL…	[NiFe] Group 4a	[NiFe] Group 4a	Evolving	Sensitive	6 or 9	[NiFe]-centre, 1 x [4Fe4S] clusters	NuoL, NuoH, two [FeS] proteins, (three antiporter subunits)	3.24138	1.24469	0	0	0	2.75887	5.75587	1.09572	1.3791	0	11.6347	6.50392	0	0	3.64846	0	0	0	0	0	0	2.47683	2.864	1.78261	2.24303	2.68684	0	0	2.2639	0	0	0	27.1976	0	3.17617	0	19.5172	0.774432	5.16402	8.149	8.36114
WP_021726228.1	MVTQLTSHMNEGEAEEPVTLVVDGTRVTVPRSATILEACRQAGQDVPTLCFLKGINEIGSCRICMVEVEGSERLVASCNNYVAEGMVIHTNSPKVRLARRENTRLLLSQHDVECPTCTRSDSCHLLDIATSLGVIGKPRQQMLMHSPWPQGFPLIRDNDKCIRCMRCIQVCDKMQSSHVWDITNRATHTFVDVARGADINDVDCTLCGQCITHCPTGALRERDDVERVYDALADPTVTTIVQIAPSVRTSWGDFWGLDDEQATIEHLVAALRPMGFDYVVNTDFSADLTIMEESAELLVHMRRNASGEGSGYPMFTSCCPGWVRFCKAHYPQLVDGLSTSKSPQGMFGAVVKSYYAERLGIDPHRIFCLSIMPCLAKKAEVAYPNLNDACGDPDMDCSL…	[FeFe] Group A2	[FeFe] Group A2	Evolving	Labile	2	[FeFe]-centre, 3 x [4Fe4S] clusters, 1 x [2Fe2S] cluster	NADH-dependent glutamate synthase	1.65306	0.579288	1.02972	0.774999	1.41309	0.919623	2.87794	1.09572	2.29851	2.75736	0.684393	3.25196	2.74687	0	0.521209	0	5.99537	1.3825	0	1.57458	0.454164	1.85762	4.29601	3.56523	1.74458	2.14947	1.3977	1.84907	0.754635	0.492503	1.0268	0.924102	0	0	4.2349	1.78498	0.433716	4.64659	0.430335	2.71633	0.643165
WP_016308995.1	MTRSVIDPITRIEGHLRVEMEVENGVVADAWVSGGCFRGMELVVQNRTPEDAAQIVERICGVCPVSHAHASSIAGDKAYGITISNNARIIRNLLEGAQFLHSHILWLYNLAALDYVNPLNALQANVDNAYAVALENGLALHSDLNQLYDKLGAFAANGQLSIFSGNWFDADNGEAYKLTPELDLILTSHYLEALKMQARASEMAALLGGKMPHVMTSIPGGNMWVPTESKLDDLLAMAIEVRDWVNDTVLADTVALAGPYAEALTFGKGCGRYIAWGVFEGNGWPYGDNYIEQMKNRYLPMGVLDENFGVTDVEESKIQEYMGHSWYKGDDTYTSPYFTTDPDYTDYNVDDRYTWVKCPTYDGKPMEAGSMSRIFAAYVRGVPFIKENVDAVLGILGAQ…	[NiFe] Group 1a	[NiFe] Group 1i	Anaerobic Uptake	Sensitive	3	[NiFe]-centre, 3 x [4Fe4S] clusters	Cytochrome b	0.659671	0.07673	0	0	1.41309	0	1.43897	0	2.29851	0	0	0	3.43359	0	0	0	0	0	0	0	0	1.11457	1.432	5.34784	0	0.537368	0	0	1.50927	0.492503	0	0	1.59986	0	0	0	0	0.774432	0.86067	0	2.57266
WP_009279121.1	MVGHEHEQGERDVATKAVSLVVDGTPVTVPAGTSILGACRAAGSKVPTLCYLRELNEIGSCRVCVVEVKGRERLVASCNNCVEEGMEVLTNSPKVRCARRENVLLLLSQHDATCTTCVRSGNCSLQEVSNDLGLVGMPYPTILPHGSWPQGFPLIRNNDKCIRCMRCIQVCDKVQASHVWGITNRATHTTVDVADGASILNVDCTLCGQCITHCPVGALRERDDVSRVYDALQDPEVTTVVQIAPSVRTSWGDHWGLGETAGMGRLVSALRHMGFDYVVNTDVAADLTIMEEGTELLRHLGEGRPYPLMTSCCPAWVRFVKAHHPELVDDVSTSKSPQQMFGAVVKSYYAQLLGLDPHKVFSLSIMPCVAKKAECAYPNMNDACGDPDVDCALTVRELE…	[FeFe] Group A2	[FeFe] Group A2	Evolving	Labile	2	[FeFe]-centre, 3 x [4Fe4S] clusters, 1 x [2Fe2S] cluster	NADH-dependent glutamate synthase	0.801479	0.175313	0	2.325	5.65234	0.459812	0.479656	4.38288	1.3791	2.75736	0.684393	0	0.686718	0	0.521209	0	0	0.921666	0	1.57458	0	0.866889	0	1.78261	0.249226	0.537368	0	0.924536	0.754635	0	0.171133	1.8482	0	0	1.05872	0	0	0	0.430335	3.2596	0.643165
WP_028026344.1	MGKATVIPFGPQHPVLPEPLHLDLVVQDETVVDVLPQIGFVHRGLEKLVETRDYNQFIYIAERICGICATGHSVGYAETVEELMGVEVPKRAEYLRVIWHELSRVHSHLLWLGLAADAFGFESMFMHCWRLRERVLDIFEKTTGGRVILSVVKVGGVVRDIDATQMAEIIATLEGIKDDYTKIMNTLLTDTSVKNRTVGVGYLSAEDAAALSMVGPFARASNLPYDVRSFGRGAYGDLVDFQPIVATEGDCYARVKVRCLEVLQSFDIIKELAAKMPAGPIEVAVKGTPAEGAEASNVLEQPRGECYYYARGNGTKNLERMRIRTPTSQNLAGMTVALKGCDLADVNMIILTIDPCISCTER	[NiFe] Group 4e	[NiFe] Group 4e	Evolving	Sensitive	6	[NiFe]-centre, 1 x [4Fe4S] clusters	NuoL, NuoH, NuoC, [FeS] protein	0.503024	0.00725117	0	0	0	0	0.479656	0	0.919403	0	1.36879	1.62598	0	0	0.521209	0	0	0	0	0	0	1.11457	4.29601	1.78261	0	1.61211	0	0	1.50927	0	0	0	0	0	0	0	0	3.87216	0.86067	0	3.85899
WP_012798774.1	MVKLTIDGKTIEVKDNATILGACKQAGADIPTLCWMKGLNDIGSCRVCVVDCDGELVPSCNTNVREGMVIKTGTPRVVAARKANIETLMESHRGECSSCVRQETCALRALASDFNVGESAYCLPEKGIWDEDFPLIRDASKCIKCMRCVAECSKVQYCSVWEHSGPGPHMNVFVKDGLAIDAAGCALCGQCITHCPTGALTARDDTGKVMKALLDPEVITVVQVAPAVRAAWGEGVGLTREQATPKRMASALRALGFDKVFDTDFAADLTIMEEGSEFVEFLSSDKPRPMFTSCCPGWVRFVKLHYPQFVPQLSSAKSPHQMEGAVVKNTMKAQAEEEGKRLFVVSVMPCVAKKYECDVPQLSTEAGRDVDAVLTVREFDRMLHMFRVDCAALEETDFD…	[FeFe] Group A2	[FeFe] Group A2	Evolving	Labile	2	[FeFe]-centre, 3 x [4Fe4S] clusters, 1 x [2Fe2S] cluster	NADH-dependent glutamate synthase	0.985576	0.272136	0.514858	0.774999	0	0	3.83725	0	2.29851	0.919119	1.36879	0	1.37344	0	0	0	0	0	0	0	0.908327	0.247683	2.864	0	0.498452	5.37368	0.698849	0	3.01854	0	0.342266	0	7.19937	0.339987	0	1.18998	0	2.3233	4.73368	1.6298	0.643165
WP_018084282.1	MSLVTLTIDGQEVRVPPGTTILAAAKEAGVKIPTLCYLEEINVIGACRLCLVQVEGARTLVASCVAQVSEGMVVHTNTPEVRRARAINMELILSNHPQDCLTCTRSTNCELQQLAAELGVREVRFAGALPPYEPDESSLSLVRDPKKCVLCRRCVAVCDRVQGVNAIDVQERGFATVVAPAFLAPLGDVACVNCGQCSLVCPTAAIREKDQTAEVWAALSDPQKHVVVQTAPAVRVSIGEMFGLPPGSIVTGKLVAALRRLGFDRVFDTDFTADLTIMEEGSEFIHRLQNGGTLPLITSCSPGWIKFIEHFYPGLLPHLSTCKSPQQMFGALAKTYYAQKAGIDPANIFVVSIMPCTAKKFEAARPEMMASGFADVDVVLTTRELGRMLKQAGIDFAAL…	[FeFe] Group A3	[FeFe] Group A3	Bifurcating	Labile	3	[FeFe]-centre, 3 x [4Fe4S] clusters, 1 x [2Fe2S] cluster	NADH dehydrogenase, thioredoxin	0.598869	0.0395336	0	2.325	1.41309	0	0.479656	0	0	0.919119	0.684393	1.62598	1.37344	0	0	0	2.99768	0	0	0	0.454164	0.371524	0	1.78261	0	0.537368	0	0.924536	0.377317	1.47751	0.5134	0	0	0.339987	2.11745	0.594992	0	2.3233	0	0	0
WP_012414920.1	MIKFDTKVQLLKYKVLKEVAKYAFEDKLLENMMKIPENIIPGKNATMRCCVYKERAIVSERVKIAIGGDKRRANIVEVINIACDECPVGGYEVTAACRGCIAHRCEQVCPKNAISFDHEQKAHIDKTKCVECGLCAKVCPFSAILSYKRPCEKACKVVNAISMNSTKEAKIDDKKCVSCGACINQCPFGAIMDKSFILDVIDLIKKSENNTKYKLYAVVAPSISSQFSGYKLGQVITGLKKLGFYHVVEAALGADMVAMKESSELEEKGFLTSSCCPAFVSYIKKNFPDLEKDISHNFSPMAEISKYIKETTPGAKVVFIGPCTAKKMEAHLDNVRPYVDNVITFEELQALFGSKDIDLGALEEGVLDNASYYGRIFARSGGLSDAVAQAFKEKGSSFA…	[FeFe] Group B	[FeFe] Group B	Evolving	Labile	1	[FeFe]-centre, 3 x [4Fe4S] clusters, 1 x [2Fe2S] cluster	None	9.4906	4.86875	5.14858	15.5	8.47851	9.19623	4.3169	3.28716	8.27463	15.625	7.52832	6.50392	5.49374	2.32935	7.29693	0.53818	14.9884	3.22583	4.53625	0	6.81246	20.5577	11.456	0	8.22446	9.67263	6.28964	25.887	10.9422	7.38755	5.98966	10.6272	3.99965	0.339987	4.2349	4.16495	1.73487	10.0676	4.73368	27.1633	6.43165
WP_004065781.1	MRCVQICDKVQSLNIWDIINTGKRTSVGVSKIRKITEADCALCGQCITHCPTGALRERDDVRKVMDAVNNPDKIVVAQIAPAVRASWGEGLGLAQHMATEKRMAAAARALGIDYVFDTNFSADLTIMEEANEFLERFTHRDEYRWPMFTSCCPGWVRFVKSQYPDMVKHLSTAKSPQQMFGAVAKSYFAEKILQTDPENIFCVSIMPCTAKKAEAALPNINDANAGRDVDAVLTTREFDRMLRSELITPANLEEEEFDSPLGTGSGAAVIFGATGGVMEAALRTAYYALHKENPKPDLFQSVRGLDGIKEATFDIAGTTIRTAVVHGLGNTRTLMERIKAKEADYDFVEVMACPGGCADGGGQPIIEGQEPAGERGAKLYALDQNNPLRFSHENPSVIA…	[FeFe] Group A2	[FeFe] Group A2	Evolving	Labile	2	[FeFe]-centre, 3 x [4Fe4S] clusters, 1 x [2Fe2S] cluster	NADH-dependent glutamate synthase	5.38919	2.8057	5.66344	3.87499	19.7832	3.67849	1.91862	0	11.0328	12.8677	6.15953	4.87794	6.18046	4.6587	6.77572	2.6909	8.99305	5.99083	3.02417	0	0	10.7742	14.32	1.78261	22.4303	6.98579	3.49424	1.84907	7.16903	1.97001	5.134	2.7723	1.59986	1.01996	1.05872	3.56995	0.867433	14.7142	1.72134	15.7547	1.28633
WP_009139266.1	MARTTLSMHHIARVEGHGNVHVSIEDGKVRDVQMNIVEPARLFESMVVGRPYDKISYIASRICGICSSSHVVTDLLAIEDAFGVEVSDRTRMLRELLVYGSYLQNHASHLFVFAAPDFAGEESLFPLAVTEPELFNGGLAIKALGNELCTKVGGRSIHPITAVVGGFTHEVSPEEYIELADKLRDMRPFAEKVVDVFAAFPVPDIATKGDFLALREEGHYAVVSGRPCFAKDGFEFDCAQYRDYIEEYQVAHSAAYFSRRRDTQETFAASALARINVSWNELTREARLAAAKAGLRPPSLNPYSNNVAQAVELVDVCVRCEAMLRELAEGEGSSEPVDFEPRPGRGVGMTEAPRGTLVHDVEFDEAGRVVHANIITPTVHNLSDTEHNVFQVAELLANQ…	[NiFe] Group 3b	[NiFe] Group 3b	Bidirectional	Tolerant	4	[NiFe]-centre, 3 x [4Fe4S] clusters	Diaphorase, [FeS] protein	1.95673	1.17794	0	0	0	10.5757	3.83725	3.28716	3.67761	0	0	3.25196	0.686718	0	1.56363	4.30544	0	0	0	0	1.36249	1.4861	4.29601	3.56523	0.498452	16.6584	0	9.24536	0.377317	0	0	3.23436	0	0	0	0	0	0.774432	5.16402	0	7.71798
WP_027398114.1	MNKKYITIDGILAPIEGEKNILDIIRKIGIELPTFCYNSDLSVYGACRMCVVEDKHGNIMASCSTPPRSGMEIKTNTPKLQQHRKMILELILADHCRDCTTCEKNFKCKLQDIAQKFGLREVRFENYSPWEEKDTSSPSIVRDSNKCILCGDCVRMCSEIQKVGAIDFAYRGSNMEITPAFKMPIAETNCVNCGQCSAVCPTGAIVVKDDTEKVWHDLYDDNVIMVAQIAPAVRVALGDEFGIPEGSNVMGKIVTALKRMGFDDVYDTATGADLTVIEEANEFVDRLENGGKLPLFTSCCPAWFKYAEINHPDITDNISSCKSPMQMFASVLKEQARKERPKKKAKKTKVVAIMPCTAKKYEANREEFKFEDDQAVDYSITTQELANMIRESGIVFSEI…	[FeFe] Group A3	[FeFe] Group A3	Bifurcating	Labile	3	[FeFe]-centre, 3 x [4Fe4S] clusters, 1 x [2Fe2S] cluster	NADH dehydrogenase, thioredoxin	3.74403	1.68941	5.66344	6.19999	7.06543	6.43736	5.27622	9.86149	4.59702	5.51471	3.42196	1.62598	10.9875	0	7.29693	0.53818	0	7.37333	12.0967	3.14915	2.27082	3.5914	8.59201	0	0.996904	1.07474	1.3977	3.69814	4.90513	0.492503	1.5402	0.462051	1.59986	8.83967	6.35234	0.594992	6.50575	4.64659	1.72134	7.60573	0.643165
WP_006861102.1	MGTMTIDGRKVTFTDEKNVLSVIRNAGIDIPTLCYHSELSTFGACRLCTVEDDRGKTFASCSEEPRDGMVIFTNTGKLRKYRKLIIELLLAAHCRDCLTCEKSGDCNLQTLAKRFGVMEVRFENYKERRPLDFSSPSIVRDPNKCILCGNCVRVCEELQGIGALGFAHRGSDAMVMPAFDREIATTDCVNCGQCRIFCPTGAISIRHNRGEVWEALSDPDTRVVAQVAPAVRVAVGDAFGLPKGRSVMGKIVNVLHRMGFDEVYDTTFGADLTIMEESAEFLERVQSGEKLPLLTSCCPAWVKFVGEHYPEFEENVSTCRSPQGMLSAVVKEYFRDPANSGGKKTVMVSIMPCTAKKMEANRPNSYTKGEKDTDFVLTTTELIDMIKTTGIDFAELEPE…	[FeFe] Group A3	[FeFe] Group A3	Bifurcating	Labile	3	[FeFe]-centre, 3 x [4Fe4S] clusters, 1 x [2Fe2S] cluster	NADH dehydrogenase, thioredoxin	35.1191	18.4715	20.0795	20.15	36.7402	40.9232	59.4773	40.5417	50.1075	20.2206	33.5352	29.2676	42.5765	16.3054	25.018	20.4508	44.9653	29.9541	18.145	37.7898	44.0539	40.7438	44.3921	53.4784	18.1935	30.0926	46.8229	32.3587	35.4678	45.3103	34.74	20.7923	37.5967	58.4778	31.7617	61.8792	63.7563	19.3608	57.6649	19.0143	70.7481
WP_022739022.1	MTTKKQSPLRVGETHVQAVRDTFPGAVLDATWQAADQVTITVPTDMLPDVVEFLYYGRGGWLPNMVANDERPLHGCYALYYLLSMEESDPGFVVVRAEVDPHSMEYPSVTPRVPACVWSEREAFDMFGLRAVGLPDERRLVLPDDWPCDLYPLRKDSMDYRKRPAPVTDVENYSFLYEGHAEETTEVPMGPLHITSDEPGHFRLFVEGEDIIDADYRLFYVHRGMEKVAESRLNYDAVTFLADRICGICGNAHSVAYAEAVEHAQGIEVPVRAQYIRSILLEVERLHSHLLNLGLVCHYCGFDTGFQHFFRVREKTMDLAVLLTGARKTYGLNLIGGVRRDILDEQKLATIKYVRELRHEVEALVDMLVSTANFESRTAGIGRLDPAVARDFSPVGPCV…	[NiFe] Group 4a	[NiFe] Group 4a	Evolving	Sensitive	6 or 9	[NiFe]-centre, 1 x [4Fe4S] clusters	NuoL, NuoH, two [FeS] proteins, (three antiporter subunits)	6.08299	3.16619	33.4658	0	2.82617	31.2672	0	0	0.459702	0	7.52832	0	0	0	1.56363	0.53818	0	0	51.4108	0	0.454164	11.0219	0	0	0	9.13526	22.3632	0.924536	0	13.2976	0	8.31691	0	0	0	0	17.3487	18.5864	6.88536	1.08653	0
WP_005679640.1	MAFTNNIMIVRHKLLADLVRLWKNDQLVEKIDRLPIELSPRKSKPLGRCCVHKERAVWRYKMFPLMGLDMTDEHDEVTPLSEYAQQALSRPEPDKENIMCVIDEACSSCIQINYEITNLCRGCVARSCYMNCPKDAIRFKKNGQAMIDHETCISCGICHKSCPYHAIVYIPVPCEESCPVKAISKDEHGIEHIDESKCIYCGKCMNACPFGAIFEISQTFDVLQRIRKGEKMVAIIAPSILGQFKTSIEQVYGAFKEIGFTDVIEVAEGAMSTTSNEAHELLEKLEKGQSFMTTSCCPSYIELVEKHIPGMKPYVSTTGSPMYYTARIAKEKHPDAKIVFVGPCVAKRKEVRRDEAVDYILTFEEVGSILDGLDIQLEQTQAFSILHTSVREAHGFAQA…	[FeFe] Group B	[FeFe] Group B	Evolving	Labile	1	[FeFe]-centre, 3 x [4Fe4S] clusters, 1 x [2Fe2S] cluster	None	10.6463	16.8837	0.514858	13.95	16.957	5.05793	0.479656	3.28716	0	56.0662	3.42196	126.826	21.2883	13.9761	0	0	2.99768	5.99083	3.02417	0	1.81665	13.1272	0	3.56523	16.1997	20.42	6.28964	0	5.65976	0	63.1482	0	0	0	0	0	0	0.774432	0	24.9903	1.28633
WP_008824689.1	MNKVNVKINGMSFDVPQDYTVLDACREASIDVPTLCFFKDMNETGACRMCVVEVEGARTLLASCVTPVRDGMNIKTSSKRVQNARKTNLELILANHNRECLLCDRNKSCELQDFADSMNVKDIAFKGDTREGRFVDATPSIVRDTSKCILCGRCISVCKKSAGMGILSFVERGFDTYVAPAFDFDMGEAGCIYCGQCINACPVSALKEKPEIDRVWDAINDEKKYVVFQTAPAVRAALGEEFGMEIGNRVTGKMVAALRRLGGNKVFDTNFAADLTIMEEANELLDRIKNGGTLPLITSCSPGWVRILENYYPEFIPNLSTCKSPHQMLGAVTKSYYAEKIGVNPKNMYVVSVMPCIAKKFEKDREEMEVNGIRDIDAVITTRELAKMIKEAGIDFNKL…	[FeFe] Group A3	[FeFe] Group A3	Bifurcating	Labile	4	[FeFe]-centre, 3 x [4Fe4S] clusters, 1 x [2Fe2S] cluster	NADH dehydrogenase, thioredoxin, thioredoxin	1.575	0.613622	0	2.325	2.82617	2.75887	4.79656	1.09572	2.75821	1.83824	0.684393	0	0	0	0.521209	0	0	0	3.02417	3.14915	2.27082	5.20133	5.72801	0	2.74149	2.68684	1.3977	1.84907	3.01854	0.492503	1.88247	2.7723	0.799931	0.679975	1.05872	0.594992	0.867433	0	0.86067	2.17307	2.57266
WP_015720177.1	MSIAQITIDGKTITMPAGSTILEAAKKLHVDIPTLCYLNLEHLKVNNQLATCRVCVVEVEGRRNLAPACATPIVDKMVVKTNTIRVMNARKTVMELFLSDHPKDCLVCQKSGECELQDLSTKFGLRGSPYDGGAMSTYRKDFSESIIRDMDKCVMCRRCETMCNDVQTCNVLSGVNRGFNAVVAPAFEMNLADSGCTNCGQCVAVCPVGALAEKDHTWSVIEALADPDKVVVVQTAPAVRAALGEDLGMEAGTLVTGKMVSALRSLGFDYVFDTDFAADLTIMEEGSEFLDRLTRFLAGDQSVKLPIMTSCCPAWVKFFEHQFPDLLDVPSTAKSPQQMFGAIAKTYFAEKLGIPREKMVVVSIMPCLAKKYEAARPEFSVDGNRDVDVVLSTRELARL…	[FeFe] Group A3	[FeFe] Group A3	Bifurcating	Labile	4	[FeFe]-centre, 3 x [4Fe4S] clusters, 1 x [2Fe2S] cluster	NADH dehydrogenase, thioredoxin, thioredoxin	0.644845	0.112703	0	0	1.41309	0.919623	0.959312	1.09572	0.459702	3.67647	1.36879	0	1.37344	0	0.521209	0	0	0	0	3.14915	0	0.123841	7.16001	0	0	0	0.698849	0	0.377317	0	0.171133	0.462051	0	0	0	0	0	0.774432	0	2.17307	0
WP_016308610.1	MASTSITVEHMARVEGHGDIRLVIEGGQVTTCEMAVVEPARLFESMVRRRSYEEVPYIASRVCGICSSSHVVTDLRAIEAVFGVEVSDRTEALRELLVYGSFLQNHATHLFVFAAPDFLGHKSVFPLADVNPELLQKALGLKALGNELCTLVGGRSIHPITAVVGGFTHEIEPAEYLRLADAMDRARPFALECVDLFRDFDTLDVQTEGDLLAMVAPGAYPVCTSDTARFVRAGYDFAVDAVEEEIEEYPQHSSAAFLARARRTGRPYLTAALARVNASWDALCKDARYAAAKAGLRPPEYNPFANNIAQAVELVDVLDRCAALCRRLAADDFAGPSAPVPFTVCAGRGVGFTEAPRGALFHILDLDGEGRVERASILTPTAQNIANLEADMAQLAEKM…	[NiFe] Group 3b	[NiFe] Group 3b	Bidirectional	Tolerant	4	[NiFe]-centre, 3 x [4Fe4S] clusters	Diaphorase, [FeS] protein	1.28037	0.497162	2.05943	4.64999	0	1.37943	1.43897	0	0	0	0	0	0.686718	0	0	0	0	0.460833	9.0725	0	5.44996	1.4861	2.864	1.78261	0.249226	3.76158	2.09655	2.77361	0.754635	0	1.0268	0.462051	0.799931	0	0	0.594992	0	3.09773	0.86067	0	1.92949
WP_003512584.1	MQMVNVTIDNCKIQVPANYTVLEAAKQANIDIPTLCFLKDINEVGACRMCVVEVKGARSLQAACVYPVSEGLEVYTQTPAVREARKVTLELILSNHEKKCLTCVRSENCELQRLAKDLNVKDIRFEGEMSNLPIDDLSPSVVRDPNKCVLCRRCVSMCKNVQTVGAIDVTERGFRTTVSTAFNKPLSEVPCVNCGQCINVCPVGALREKDDIDKVWEALANPELHVVVQTAPAVRVALGEEFGMPIGSRVTGKMVAALSRLGFKKVFDTDTAADLTIMEEGTELINRIKNGGKLPLITSCSPGWIKFCEHNYPEFLDNLSSCKSPHEMFGAVLKSYYAQKNGIDPSKVFVVSIMPCTAKKFEAQRPELSSTGYPDVDVVLTTRELARMIKEAGIDFNSL…	[FeFe] Group A3	[FeFe] Group A3	Bifurcating	Labile	4	[FeFe]-centre, 3 x [4Fe4S] clusters, 1 x [2Fe2S] cluster	NADH dehydrogenase, thioredoxin, thioredoxin	3.09152	2.91323	7.20801	2.325	5.65234	7.35699	5.75587	5.4786	10.5731	7.35295	2.05318	0	0.686718	0	2.60604	0	2.99768	0.460833	3.02417	0	3.17915	4.2106	8.59201	0	3.73839	2.68684	0	5.54721	6.03708	0.985006	1.5402	5.08256	1.59986	0.339987	2.11745	0	0.867433	3.09773	3.01234	5.43267	2.57266
WP_013907125.1	MSATEKVSTFRPTPEARTGGGTYLPGELRGIIRINQNKCVGCDTCKQFCVAHAIRGSIGVAHSIDTDRCINCGQCLVNCPFGAIEQMSFVDEVEEKLRDPEWTVVAIIAPAVRVALAEEFGSPSGTLTVGRMHNAFKKIGFKIYENNFAADQTIMEEAYEFIAKVRYWVLGERGPELEKFAHHPLPHFTSCCPAWIRYAELYYAKVLPHISGAKSPQQMAGASAKTWAALDVWNVDPRKVYTVGIMPCTGKIFEASRPEFKSAWQWLKENGYLPEDTPPFPDVDAVLTTRDAATLLKRFGVNPLKLSEKEENIEITEIYSGGATIFGTSGGVTEAALRTAYYVLSGKEPPAWDFFAVRGYTTGIREAVIPIPLKALGGKEFHLKICVVNGAINHLDKVL…	[FeFe] Group A1	[FeFe] Group A1	Evolving	Labile	3	[FeFe]-centre, 2 x [4Fe4S] clusters	Small subunit, cytochrome b	4.29647	2.36175	1.54457	1.55	1.41309	1.83925	2.87794	1.09572	1.83881	1.83824	3.42196	6.50392	3.43359	11.6467	3.64846	5.3818	0	0.921666	6.04833	11.022	3.63331	4.2106	5.72801	1.78261	6.23065	2.68684	6.28964	12.019	9.43293	3.44752	3.76493	0	2.39979	1.01996	12.7047	2.37997	0.433716	3.87216	2.58201	3.2596	5.14532
WP_022418208.1	MLNIKIEGVPYQVEEGLTILEAAKKCGYEIPSLCSFNHGECSQGSCRVCLVEATGARGLVASCVYPVSEGMEIKISTPKATEARRTSVELLLSNHNQNCQQCDKNGKCELLHVAKLVGAREGMYAGAKTPATIDKLSPSIYRDTSKCILCGRCVARCKNAHGLGILGFEKRGFNTIVAPAENRSFANSPCILCGQCVTVCPTGALMEVSDVAKVDEAFAKGKYVVVQTAPAVRAALGEEFGDKVGTLATGKMVAALRRLGFKKVFDTNFGADLTIMEEATELLGRIKDGGVLPMITSCSPGWINYCEYNYADLIPHLSSCKSPHEMMGAILKTYYAEKTGVKPEDMFVVSIMPCTAKKYEAQREELKTNGLSDVDAVLTTRELARIIRRAGIMWNRLPE…	[FeFe] Group A3	[FeFe] Group A3	Bifurcating	Labile	4	[FeFe]-centre, 3 x [4Fe4S] clusters, 1 x [2Fe2S] cluster	NADH dehydrogenase, thioredoxin, thioredoxin	4.44822	4.32964	1.02972	0	8.47851	0.919623	1.91862	0	0.459702	1.83824	1.36879	0	4.80702	0	7.81813	0	0	1.3825	1.51208	0	1.36249	4.08676	68.7361	0	69.0356	2.68684	0.698849	1.84907	1.88659	0.492503	1.19793	1.8482	0	0	0	0.594992	0	7.74432	0.86067	21.7307	0
WP_005944276.1	MSFRGINTTVIQIRRQVFTEVARMAYANVKGEQANHLMRKIPYTIIPGEEGKLRKDIFLERAIVEERVRLAMGLPTRRMDEHNSVVSGLEDASIADKYYDPPLVNVIKFACNRCPEKLVKVSDLCQGCLAHPCMEVCPKKAITWESGRSIIDQDKCIKCGRCVGVCPYNAIVKTERPCAAACGMGAIHSDELGRAEIDYSKCVSCGQCLVNCPFGAIADKGQIYQLIQGFNRGDRIYALVAPAFINQFPGLASTGKLKAALKAVGFYDVVEVAIGADLCTVDEAHDFLEEVPGKLNFMATSCCPAWSMMAKTAFPDLAKNISMTMTPMVFTARMMKQKDPEARMCFIGPCAAKKLEASRRTVRSDVDFVLTFEELAGIIEAKDVDTSLLEVDEAEALHA…	[FeFe] Group B	[FeFe] Group B	Evolving	Labile	1	[FeFe]-centre, 2 x [4Fe4S] clusters	None	233.426	142.771	295.014	252.65	230.333	54.7176	222.081	143.539	104.812	65.2574	290.183	256.905	267.82	598.642	174.605	430.006	254.803	140.093	736.384	577.87	354.248	348.861	266.352	196.088	70.0325	191.303	268.358	49.0004	225.636	219.164	360.92	30.4954	400.765	11.8996	284.797	207.057	123.175	99.1273	186.765	12.4951	257.266
WP_004836902.1	MKESYIDILNIRRMAFEAVAKIAYEDRPITDIALEIYDILPGEEAKYRENIFRERAVMGERLRMCIGLDARTAANTDAVTDGLDSMDYDRRIYNPPLVSVIKIACEACPENKVTVTDQCHACIGHPCVNVCPKNAVSYSAKGAYIDQDKCIKCGKCVDACPYHAINHQKRPCAESCGVKAISSDDLGRADINEDKCVACGRCIISCPFGAISDKSEIYQLIKSLQSERKVYAIVAPSFVGQFGAHVSPEQIREAIKQLGFDDVIEVGLGADLTTMNEAHEFLEQVPTGEIPFMGTSCCFSWKSMVRKQFPDINDKISESSTPMIYSGKQMKKRDPNCEVVFIGPCISKKLEALEEEVAEVIDFVITYEELLGMFLAKGIEPSEIEVDEPMMDASETGRF…	[FeFe] Group B	[FeFe] Group B	Evolving	Labile	1	[FeFe]-centre, 2 x [4Fe4S] clusters	None	1.05065	0.388873	0	0	4.23926	0.919623	2.87794	9.86149	1.3791	3.67647	0	0	0	0	3.12725	0	0	0	0	0	0.454164	0	4.29601	1.78261	0	2.14947	2.79539	0	0.377317	0	0.5134	1.38615	2.39979	0	0	1.18998	0	0.774432	1.291	3.2596	0
WP_015513468.1	MKVIDFKNASCKHCYKCVRSCSVKAIKVKDAQATIMDDHCVLCGTCLEVCPQNAKTFVSDLEKVKAFITMGEKTIVSLAPAYLGIFDYDKPGQVVDALLRLGFSEVRETAEGAAYVTEAYARLLEEGQMKNIISTCCPSVNELVEKYYPELVEYMAPVVSPMIAHGKLIKSMYGPDVKVVFVGPCIAKKQEAEGDDRTTGFVDAVLNFEEIESWLQERDISIRECEGKQPTNPDPKVNRLYPVTSGVISSVLAKKKVDSYKKIFVDGIEDCREVFEDMKKGLIDGCFIEANMCEGGCVKGPAVNKLHISKYKATMVIEEQVEKQDPAYSQLAGNIDISKHFRSERIQDEMPTEEQITRILKATGKYNKTQELNCGACGYPTCRDKAIAVFQGKAEQEMC…	[FeFe] Group C	[FeFe] Group C3	Sensory	Labile	3	[FeFe]-centre, 2 x [4Fe4S] clusters, PAS domain	Phosphatase, thioredoxin	13.2755	10.8161	9.26745	14.725	4.23926	19.7719	22.0642	18.6273	15.6299	22.978	17.1098	26.0157	4.80702	27.9522	19.2847	14.5309	8.99305	8.75582	27.2175	15.7458	1.36249	14.2418	11.456	5.34784	6.97833	19.3453	4.19309	15.7171	18.8659	31.5202	8.21439	5.08256	11.199	2.7199	5.29362	21.4197	14.3126	32.5262	12.4797	28.7931	8.36114
WP_021724994.1	MPGTMRGVYTNLTKIRRDVFREVSKVCYQAGEDSSMTNADIDDAFDELPFKILPGDVATYRESVFLERAIIGERIRLAMGLPLQGVDRPQRISDGFNNAQIDNMSYYEPPLINIIKFACNACQDNVYEVTNMCQGCLAHPCREVCPKQAISFVDKRAHIDQDACVHCGMCERTCPYEAIHHHVRPCAAACGMGAIGSDEHGRADIDYEKCVSCGMCLVNCPFGAIADKSQIAQVIWSIQHGEEVIAAVAPSFVGQFGGKGNVGKLREAFKQLGFSGVEEVALGADLCTVQEAEDFLDEVPDKLPFMGTSCCPAWSVMAKREFPEYADTVSMALTPMTLTARMIRTQHPHAKIVFVGPCSAKKLEAMRKSVRSEVDFVLTFEEMAGMMDAREIDYLALED…	[FeFe] Group B	[FeFe] Group B	Evolving	Labile	1	[FeFe]-centre, 2 x [4Fe4S] clusters	None	1.86093	0.891399	2.05943	1.55	7.06543	1.83925	0.479656	3.28716	2.29851	2.75736	2.73757	0	0.686718	0	2.08484	0	0	2.765	1.51208	1.57458	1.36249	1.98146	1.432	1.78261	1.74458	1.61211	0.698849	3.69814	1.88659	1.47751	1.19793	0	0.799931	1.01996	1.05872	0	0.433716	4.64659	1.72134	7.06247	0.643165
WP_015513462.1	MENITIKINGVEVSAPAGSTILEAARLAHIDIPTLCYLKEINEIGACRMCIVEVKGARSLVASCVYPINPGMEVWTNTPKVIESRKKTLELLLSNHKKECLSCVRSGNCELQQLCKELGVEDENYYSGEMTPAMIDTSAAHMVRDNSKCILCRRCSAVCEKVQGIGVIGPNERGFKSYIGTAFNMDLADTSCVSCGQCIAVCPTGALHEKDNTDEIFEAIADPDKYVVVQTAPSVRAGLGEEFGYPMGTDVEGKMVAALRRLGFDKVFDTDFAADLTIMEEAHEFLDRVQNGGKLPLITSCSPGWIKYCEHYFPDMTENLSSCKSPQQMFGATLKTYYAEKMGIDPKKIVSVSVMPCTAKKFEIGRDDEDAAGVPDVDIAITTRELARMIKKVGIMFTE…	[FeFe] Group A3	[FeFe] Group A3	Bifurcating	Labile	4	[FeFe]-centre, 3 x [4Fe4S] clusters, 1 x [2Fe2S] cluster	NADH dehydrogenase, thioredoxin, thioredoxin	22.4815	16.217	21.1092	39.5249	18.3701	45.5213	28.2997	13.1487	16.0896	24.8162	24.6381	17.8858	10.3008	13.9761	23.9756	11.3018	14.9884	18.8941	19.6571	15.7458	10.4458	36.1617	28.64	14.2609	13.209	23.1068	9.08503	61.0193	29.4308	36.4452	14.7175	18.02	7.99931	8.1597	2.11745	28.5596	19.5172	30.2029	18.0741	46.7209	19.2949
WP_013979777.1	MGKATVIPFGPQHPVLPEPLHLDLVVEDETVIEAIPQIGFIHRGLEKLVETRDYNQFIYVAERICGICAFGHSMGYAETVEKLMGVEIPERAEYLRVIWHELSRIHSHVLWMGLAADAFGFESLFMHCWRLRERVLDIFEKTTGGRVIFSVVKVGGVVRDIDDAMFAEMKRTLEGIKDDYRQICNAFLKDSSVKNRTVGVGYISPEDAFALSMVGPFARASNVSNDARSLGNGGYGKLSDFQPVLDTQGDCYARVKVRALEVLQSIDIIEEMIAKIPAGDIAVDVKGSPSAGAEAANLVEQPRGECYYYARGNGSKYLERMRMRTPTSQNLAGMTSALAGCDLADVNMIVLTIDPCISCTER	[NiFe] Group 4e	[NiFe] Group 4e	Evolving	Sensitive	6	[NiFe]-centre, 1 x [4Fe4S] clusters	NuoL, NuoH, NuoC, [FeS] protein	1.65508	0.734517	5.66344	0	0	7.35699	3.83725	3.28716	0.919403	1.83824	0	0	6.86718	0	0.521209	0	0	2.765	4.53625	0	2.27082	4.58213	0	0	0.747678	1.61211	1.3977	2.77361	0	0	0.5134	1.8482	3.19972	1.01996	0	0.594992	2.6023	0.774432	0.86067	1.08653	1.92949
WP_015394438.1	MIGQFMTIDNIPVEIQDEKNILELVRKAGIELPTFCFYSELSVYGACRMCMVETKRGDIESACSTPPRAGMEIFTNTPRLRKYRKNILELLLANHCRDCTTCQQSGACKLQELAKRFGINDVRFPNTAPDVELDESSVAIVRNKSKCILCGDCVRVCEEVQNVGAIDFVGRGSKMTVTTAFDEPIGHSNCVSCGQCAAVCPTGAIVVRSNTEKLWQDLNNPKKRVVVQIAPAVRVGLGTQLGEEDGRNAMGKMAAALRRMGFDKIFDTSVGADLTVIEETNEFVSKLQNNEALPLFTSCCPAWVNYAEKTYPELMKNVSSCKSPMGMFAAVLKEHYREDDRELVSVAIMPCSAKKFEAAREEFKNDGVPDVDYVVTTQEFVNMVNESGIAFSELEPEAL…	[FeFe] Group A3	[FeFe] Group A3	Bifurcating	Labile	3	[FeFe]-centre, 3 x [4Fe4S] clusters, 1 x [2Fe2S] cluster	NADH dehydrogenase, thioredoxin	0.735375	0.198478	0	0	2.82617	0.459812	0	2.19144	0	1.83824	1.36879	3.25196	0.686718	0	1.04242	1.07636	0	0	0	0	0.454164	0.619207	1.432	0	0.249226	2.68684	0	0	2.2639	0	0.342266	0.462051	0	0	0	0.594992	0	4.64659	0	2.71633	0
WP_013780878.1	MDEKMVTLTIDGQKVTVPAYYTILEAARSANIRIPTLCFLKDINEIGACRMCIVEIKGAKALQASCVYPVADGIEVSTNSPAVRDARKVTLELILSNHDRSCLTCVRNRNCELQQLADELNIKEIPFEGERLTLPIDDLSPAIVRDPNKCILCRRCISTCRNVQEIGVIGATERGFNTMVEPPFKMSINQVPCINCGQCIEACPVGALREKDDTERVWTALADPELHVVVQTAPAVRAALGEEFGMPIGTRVTGKMAAALRRLGFDKVFDTDFAADLTIMEEGTELLDRLKNGGKLPLITSCSPGWVKYCEHYYPEFLDNLSSCKSPHEMMGAVLKSYYAQKMNIDPSKIFVVSVMPCTAKKFEAQRPELAANGHPDVDVVITTRELARMIKEAGINFL…	[FeFe] Group A3	[FeFe] Group A3	Bifurcating	Labile	4	[FeFe]-centre, 3 x [4Fe4S] clusters, 1 x [2Fe2S] cluster	NADH dehydrogenase, thioredoxin, thioredoxin	2.13579	0.944144	3.08915	1.55	2.82617	9.19623	0.479656	2.19144	0.459702	4.59559	2.05318	3.25196	2.06015	0	2.08484	0	0	0.460833	0	0	0	2.47683	7.16001	0	2.24303	1.61211	1.3977	1.84907	1.88659	1.47751	0.171133	2.31025	0	2.03992	1.05872	4.16495	0.433716	3.87216	0.430335	5.97593	1.28633
WP_013779523.1	MEKTMKINGKQVSFTDEANLLEVIRKAGIELPTFCYHSELSVYGACRMCLVEDDNGRIMAACSTPPRPGMSIRTHTERLIRQRRVTLELLLANHDRECTTCVKSGNCRLQELANILGIGEIRFGQKNGRLPIDDSSPAIVRDPNKCILCGDCVRMCEEVQGVGVLGFAYRGSNAKVVPPFNKNISEVNCVDCGQCAAVCPTGALTIASHMEKVWSALYDPQKTVVAQIAPAVRVSLGEEFGLKPGTPATGKVVGALKKIGFDKVFDTCFAADVTAIEESCEFLERISKNQRLPQFTSCCPAWVKYVELHYPQYKDNISTCRSPQQMFGSLMKGIYAKAMGTDSENIFVVSIMPCTAKKSEAKREEFFKNGIPDVDAVLTTQELARMIREAGVVFDEVEE…	[FeFe] Group A3	[FeFe] Group A3	Bifurcating	Labile	3	[FeFe]-centre, 3 x [4Fe4S] clusters, 2 x [2Fe2S] cluster	NADH dehydrogenase, thioredoxin	1.4376	0.608595	1.54457	3.09999	1.41309	0.459812	0.959312	1.09572	2.75821	2.75736	2.05318	0	0	0	4.69088	0	0	0.921666	0	0	0.908327	2.60067	2.864	0	6.7291	2.68684	0	0.924536	0.377317	0.985006	2.22473	0.924102	0.799931	0.339987	1.05872	0.594992	0	6.19546	1.72134	4.34613	0
WP_005941153.1	MAFTNNIMIVRHKLLTELVKLWKNGELTTDKIDRLPLELSPRRSKHAGRCCVHKERAVWKYKSLPLLGLDMDDETDELTSLSEYAARALDRAENGMPKDNIMCVIDEACSACVQINYEITDLCRGCTARSCQYNCPKGAVHVHADTGKAWIDHDTCISCGICHKSCPYHAIVYIPVPCEESCPVKAISKDEHGIEHIDEDKCIYCGKCMNACPFGAIFEISQTFDVLQRIRKGEKVVAIVAPSILGQFSTTIEQVYGAFKQIGFTDVIEVAQGAMETVENEAHELIEKLEEGQKFMTTSCCPSYIELVNKYIPDMKKYVSTTGSPMYYAARIAKKKHPDAKIVFVGPCVAKRKEAQRDEAVDFVMTFEEISSIFDAMEVNLEIVQPYAMEFSSVREAHG…	[FeFe] Group B	[FeFe] Group B	Evolving	Labile	1	[FeFe]-centre, 3 x [4Fe4S] clusters, 1 x [2Fe2S] cluster	None	5.90991	7.29799	0.514858	2.325	0	0.919623	0.479656	6.57433	4.59702	0	0	39.0235	37.0828	0	5.21209	0	0	0.460833	0	1.57458	4.54164	24.2729	0	1.78261	0.498452	0	2.09655	0	0	3.94002	0	0	0	0	0	0.594992	0	0	0	8.149	0
WP_028828847.1	MSKAMIIDGMRVPYTDEKNILAVIRNAGIDLPTFCYHSELSIYGACRMCSVEDQRGNIIASCSERPKDGMVVSTNTRRVQKYRKTILELLLSNHDKDCTSCEITGKCQLQSLALRYGVKKSRFENNFQEKEIDNSSPSIVRNPNKCIKCGDCVMVCEDVQGVGALGFAHRGSEVEITPAFGRKLAESNCVNCGQCRIVCPTGAITIKNDTQRVWDAIFDDNTKVVAQIAPAVRVALGEEFGLPAGTMTLGKMVAAMRKMGVEQIFDTAIAADLTVREESGEFLSKFTKGQGLPLFTSCCPAWVKFVENKYPEFVQNLSTARSPQQIFGSVYKEIENANRENEDKRKPFLISVMPCTAKKEEITRPEFTKNGVPDVDVVITTQELAIMIKEMGVNFADLE…	[FeFe] Group A3	[FeFe] Group A3	Bifurcating	Labile	3	[FeFe]-centre, 3 x [4Fe4S] clusters, 1 x [2Fe2S] cluster	NADH dehydrogenase, thioredoxin	0.853074	0.262047	0.514858	0	2.82617	0.459812	0	0	1.83881	0.919119	2.05318	0	2.06015	0	1.56363	7.53452	2.99768	1.3825	0	0	0.908327	0.99073	1.432	0	0.249226	3.22421	0.698849	0	0.377317	0.492503	0	1.8482	0	0	0	1.18998	0	0.774432	0.430335	0.543267	0
WP_022094158.1	MAHRSVIPFGPQHPVLPEPLHLDLVIDDDRVIEAIPQIGFVHRGLEKLTEKRDMHQFGYIAERICGICAVGHSCGYASACERMLDIEVPGRVQYIRTILHELSRIHSHLLWLGLLADAFGFEALFYRSWTLREQILKIFESTCGGRVILSINEIGGLKHDIEDSELAGIVQTLDAMRPDYEALVHTFLDDNSCGERLHGVGVISKKDALELSMVGPFGRASGVDYDVRMFDDGAYADLAAFEPIVATDGDCYARCQVRCAEVTQAMDIIKELVGKIPHDGIGGRTKLTPADGARGEVVIEQPRGEAYYYVRGNGTKNLDRFRVRTPTSQNLAGLTHALQGVLLANVPMIILTIDPCISCTER	[NiFe] Group 4e	[NiFe] Group 4e	Evolving	Sensitive	6	[NiFe]-centre, 1 x [4Fe4S] clusters	NuoL, NuoH, NuoC, [FeS] protein	21.3967	12.4415	12.8715	0	40.9795	25.2896	17.7473	12.0529	25.2836	14.7059	24.6381	24.3897	0.686718	0	8.86055	0	11.9907	0	0	17.3203	0	16.5947	7.16001	8.91307	6.23065	17.1958	0	0	19.6205	15.2676	3.76493	10.6272	167.185	0	16.9396	7.7349	49.8774	6.19546	73.5873	25.5335	38.5899
WP_014254579.1	MFWKGVHKTMEMVNITIDNRKIQVPKDYTILEAAKAANIYIPTLCFLKDINEIGACRMCVVEVKGARSLQAACVYPVSEGLEIYTQSPAVREARKVTLELILSNHEKKCLTCVRSKNCELQTLAEELNVKDIRFEGETYKLPLDDFSPSVVRDPNKCILCRRCVSMCKNVQQVSVIDTTERGFKTIISSAFNKSLNEVPCTMCGQCINVCPVGALREKDDTDKVWEALANPELHVIVQTAPAVRVALGEEFGMPIGSRVTGNMIAALKLLGFDRVFDTDTAADLTIMEEGTEVINRIKNGGKLPVITSCSPGWIKFCEHYYPEFLDNLSTCKSPHEMFGAILKSYYAEKEGIDPSKVFVVSIMPCTAKKFEAARPELAANGYPDVDVVLTTRELARMIK…	[FeFe] Group A3	[FeFe] Group A3	Bifurcating	Labile	4	[FeFe]-centre, 3 x [4Fe4S] clusters, 1 x [2Fe2S] cluster	NADH dehydrogenase, thioredoxin, thioredoxin	2.39329	1.21755	2.05943	3.87499	4.23926	3.21868	4.3169	3.28716	6.43582	1.83824	2.05318	0	0.686718	0	5.21209	0	0	1.84333	3.02417	0	0.908327	2.35298	5.72801	0	1.49536	4.29895	3.49424	7.39628	4.90513	3.94002	1.71133	2.31025	0.799931	1.01996	0	1.78498	0.433716	3.87216	1.72134	7.06247	0.643165
WP_012625292.1	MSNRTTVIPFGPQHPVLPEPLHIKFVVEDETVVGAIPQLGFVHRGLESLVRTKDYNQMVFVVERICGICSCIHANCYCNALENMMGITAPPRAQFLRVIWSELHRIHSHLLWLGLFADAFGFESVFQQFWRIREHVMDICEATAGNRVILSVNVVGGVRRDLAPDQIRWMLGRLDELQKGMRELTTTMLDDYTVQERTRGIGYLSKDDARLLGAAGPTLRGSGWEIDERMHGYAAYNDLNFIPVVEHDGDCYARAKVRFYEVLHAMDLIREALNRLPESELTVKVPGNPDGEAVFRVEQPRGELFYYIRANGTKYLERMRVRTPTFANVPPLLHMLPGCKLPDVPVIVLSIDPCISCTER	[NiFe] Group 4e	[NiFe] Group 4e	Evolving	Sensitive	6	[NiFe]-centre, 1 x [4Fe4S] clusters	NuoL, NuoH, NuoC, [FeS] protein	0.483906	5.46627	0	0	0	0	0	0	0	1.83824	0	9.75588	0	0	0	0	0	1.84333	0	0	0	0	2.864	0	0	0	0	0	0	0	0	0	0	0	0	0	0	0	0.430335	0	0
WP_006874781.1	METTERSFDTNVQLLKYKVIKGVVEHFDKGTLESAYRDIPLAIAPGPKPTMRCCVYKERAIITERVRMAMGGDHENPNAIEVIRIACDECTVNRYHVGSACRGCIAHRCEHACPTGAISVHDGKAHIDQEKCVECGRCATACPYSAIMKYTRPCENACKIKAISMHRDNSAKIDNDKCIACGACVYQCPFGAIVDKSFVLDALTMMRDSENNAKYRVYAVVAPSISSQFSYAKTGQVVTGLKKLGFHSVVEAALGADMVAYDEAAELAEKGFLTSSCCPAFVAYVKSAFPDLANHISHNPSPMEAVARFIKRTDPTARCIFVGPCTAKKMEFQQEACTGIDCVITFEELQALFDARGVTIEHLEESVLDNASYYGRIFARSGGLSDAVAQALKEHGISE…	[FeFe] Group B	[FeFe] Group B	Evolving	Labile	1	[FeFe]-centre, 3 x [4Fe4S] clusters, 1 x [2Fe2S] cluster	None	8.64292	5.09389	12.8715	13.175	7.06543	29.8878	2.87794	1.09572	4.59702	9.19119	11.6347	3.25196	3.43359	2.32935	1.56363	0	8.99305	5.06916	9.0725	1.57458	4.08747	5.20133	8.59201	1.78261	8.47369	9.67263	2.79539	26.8115	3.77317	13.2976	2.73813	5.08256	0.799931	0.339987	4.2349	7.13991	3.90345	5.42103	4.73368	14.1249	0.643165
WP_028026422.1	MTRSVIDPITRIEGHLRVEMEVDNGIVQDAWVSGGCFRGMELVVQDRTPEDAAQIVERICGVCPVSHAHASSIAGDKAYGITISNNARIVRNLLEGAQFLHSHILWLYNLAALDYVNPLNALNANVDEAYAVALENGLALHSDLNQLYDKLGAFAKNGQLSIFSGNWFEADKGQAYKLTPELDLILTSHYLEALKMQARASEMAALLGGKMPHVMTSIPGGNMWVPTESKLDDLLAMATEVRDWVNDTVLADTVALAGPYADALTWGKGCGRYIAWGVFEGQGWPYGDDYIEQMKNRYLPMGVLDEKFGVTDVQEDLIQEYMGRSWYEGSETYTSPYFVTDPAYTDYNVDDRYTWVKCPTYDGKPMEAGSMSRIFAAYVRGVPFIKENVDAVLGILGAK…	[NiFe] Group 1a	[NiFe] Group 1i	Anaerobic Uptake	Sensitive	3	[NiFe]-centre, 3 x [4Fe4S] clusters	Cytochrome b	0.425619	0.0213486	0	0	0	0	1.91862	0	0.919403	0	1.36879	0	0.686718	0	0	0	0	0.460833	0	0	0	1.36225	2.864	0	0	1.07474	0	0.924536	0.754635	0	0	0	0	0	1.05872	0	0	1.54886	1.291	0.543267	2.57266
WP_027399701.1	MGKRTIIPFGPQHPVLPEPVHLDLVIEDETVVEAIPSIGFIHRGLEKLVEKKEYTEMVYVIERICGICSFGHGWGYCLSVEGVMGVEIPERANYLRTIWHELSRMHSHLLWLGLLADGFGFESLFMHCWRIREKVLDIFEKTTGGRVIFSVCKVGGVRKDIDEATLKEISSVVDGMKKELKELADVFLEDYSVKNRLCGVGYLSKEDAAELAAVGPMARASGLKQDMRLLGHGVYDKLGFEPCIETAGDSYARCKVRIREVFQSIDLIIKAIEMIPDGDISVPVKGNVPANECVVRLEQPRGEAFYYAKGADSKFLERMRVRTPTNQNIPAMVKTLQGCDLADVPMLILTIDPCISCTER	[NiFe] Group 4e	[NiFe] Group 4e	Evolving	Sensitive	6	[NiFe]-centre, 1 x [4Fe4S] clusters	NuoL, NuoH, NuoC, [FeS] protein	2.46673	1.27884	5.14858	1.55	5.65234	4.59812	0.479656	2.19144	8.27463	8.27207	1.36879	1.62598	7.5539	0	1.04242	0	0	0.460833	0	0	0.908327	1.60994	5.72801	1.78261	0.747678	2.68684	0.698849	6.47175	3.39586	1.47751	1.5402	3.23436	0.799931	3.05989	2.11745	1.78498	2.6023	2.3233	5.16402	3.2596	0
WP_026893765.1	MNKYFHSVVLEEEKCKGCTHCMRKCPMEAIRVRDKRAIIIKERCIDCGECIIVCPYHAQNAITDDLSRLQDFEMNIAILSTTMYGQFTDNIDMNKVYQGIKNMGFDYVYDEGIAADISSIILRNIIEKEKIPKPIISSMCPAILRIIQVRFPTLLKNIVNIESPMEIAARLAKREIMKKNNIKEDNIGVFYLTPCPAKVTSIKQPIGIEKSELTGAISIKKIYGDIVSNTKHITDYDKFNKGSHLGIGWSSVGGQSKAIGIKNYISADGIDNVIDVLEEIELGKLNNIDFFEGYACIGGCVGGPLNVENPFIASSRIRKISNNEEYKSKVKDSYAMDLYKTKAVCWTNELKPKEIMQLDDDFETAVKKIEKLKYILDILPGLDCGSCGAPSCRALAEDI…	[FeFe] Group C	[FeFe] Group C1	Sensory	Labile	2	[FeFe]-centre, 2 x [4Fe4S] clusters, PAS domain	Histidine kinase	0.984368	0.320271	1.02972	1.55	0	0.459812	0.959312	0	0	1.83824	1.36879	0	1.37344	0	0	0	2.99768	0.460833	0	0	0	3.83908	1.432	0	0.249226	1.07474	1.3977	3.69814	0.754635	0.492503	0	0.924102	0	0.339987	1.05872	0.594992	0	2.3233	0	1.08653	0.643165
WP_026895551.1	MNMVNITIDGQNIQVPQDYTVLEAARSAGIDIPTLCYLKDINEVGACRMCIVEVKGARRLEASCVLPVSEGMVVKTNTKKIREARKATLELILSNHNGDCKTCERSGKCELETLANELGVTDIGFTGEMNTYTIDDLSPSIVRDPNKCILCGRCVNVCKNVQNVGVLSFVERGFNTMVAPSFNMSLSEVPCINCGQCIAACPVGALKEKNEIDLVWEALEDDSKHVVVQTAPAVRAALGEEFGLPIGTRVTGKMAASLRRLGFDKVFDTDFAADLTIIEEGYELLGRLKNDGKLPMITSCSPGWIKYCEYNYPDFLDNLSSCKSPHEMMGAVIKSYYAEQNDIDPKDIFVVSVMPCTAKKFEADREELAATGYPDVDAVITTRELAKMIKEGRVDFLSL…	[FeFe] Group A3	[FeFe] Group A3	Bifurcating	Labile	4	[FeFe]-centre, 3 x [4Fe4S] clusters, 1 x [2Fe2S] cluster	NADH dehydrogenase, thioredoxin, thioredoxin	3.29602	2.03744	2.05943	8.52498	9.8916	5.05793	2.39828	5.4786	3.21791	4.59559	0.684393	3.25196	3.43359	0	4.16967	0	8.99305	1.84333	0	0	1.36249	7.43048	2.864	0	7.72601	3.22421	2.79539	8.32082	5.28244	1.97001	1.36907	5.08256	2.39979	1.01996	1.05872	1.78498	1.30115	4.64659	0.430335	9.7788	1.28633
WP_010251944.1	MEMVNITIDSRKLQVPKNYTVLEAARSANIEIPTLCFLKDINEIGACRMCVVEIKGARSLQAACVYPVSEGLEIYTQSPAVREARKVTLELILSNHDKKCLTCVRSKNCELQTLAEELNIKDIRFEGESCNLPLDDFSPSIVRDPNKCVLCRRCVSMCKNVQQVSVIDTNERGFKSIVSSAFNKSLNEVPCTICGQCINVCPVGALKEKDDTDKVWSALANPDLHVVVQTAPAVRVALGEEFGMPIGSRVTSNMVAALRRLGFSKVFDTDTAADLTIMEEGTEVINRIKNGGKLPVITSCSPGWIKFCEHNYPEFLENLSTCKSPHEMFGAVLKSYYAQKEGIDPAKVFVVSIMPCTAKKFEAARPELAATGYADVDVVLTTRELARMIKEAGIDFTNV…	[FeFe] Group A3	[FeFe] Group A3	Bifurcating	Labile	4	[FeFe]-centre, 3 x [4Fe4S] clusters, 1 x [2Fe2S] cluster	NADH dehydrogenase, thioredoxin, thioredoxin	2.07412	1.01441	0.514858	2.325	4.23926	3.21868	0.479656	1.09572	1.83881	1.83824	3.42196	3.25196	0.686718	0	1.56363	0	5.99537	1.84333	0	0	3.17915	4.33445	7.16001	0	2.24303	2.14947	2.09655	8.32082	3.77317	2.95502	0.5134	2.31025	0	0	1.05872	1.18998	0.867433	1.54886	2.15167	0.543267	0.643165
WP_012808500.1	MPGTMRGVYTNLTEIRRKVFKEVSTLAYEKADKSVDEIARQMEELPYKIIPGDIATYRESVFLERAIVGERIRMTMGMPMQGVDQPENISDGLEEASRPEVYYQPPLINIVKFACNACEDNVYRVTNACQGCLAHPCREICPKEAISFVDKKAYIDQEKCIQCGMCFKVCPYQAIHHHVRPCAAACGMDAIGSDEHGRADIDYEKCVSCGQCLVNCPFGAIADKSQIFQVIQAINEGYTVVPIVAPSFVGQFGKGSVGRLREAFKEMGFAEVEEVATGADLCTVQEAEDFVKEVPDKLPFMGTSCCPSWSAMAKKEYPEHADAISMALTPMVLTARLVRKQNPESKIVFIGPCTAKKLEALRRSVKSEVDFVLTFEELAGMMESKGIDYTKLDDDNSDF…	[FeFe] Group B	[FeFe] Group B	Evolving	Labile	1	[FeFe]-centre, 2 x [4Fe4S] clusters	None	2.7424	1.64959	0.514858	2.325	4.23926	3.67849	5.27622	0	3.21791	2.75736	5.47514	0	6.18046	9.31739	2.60604	0	0	5.52999	0	3.14915	1.81665	4.08676	1.432	1.78261	6.47988	0	2.09655	2.77361	5.28244	0.985006	1.71133	0.462051	3.19972	0.679975	0	0.594992	1.30115	6.19546	10.328	4.34613	0.643165
WP_022740096.1	MTRSVIDPITRIEGHLRVEMEVENGVVADAWVSGGCFRGMELVVQNRTPEDAAQIVERICGVCPVSHAHASSIAGDKAYGITISNNARIVRNLLEGAQFLHSHILWLYNLAALDYVNPLNALQANVDDAYAVALENGLALHSDLNQLYEKLAAFADNGQLSIFSGNWFDADGGEAYVDNPEANLILTSHYLEALKMQARSSEMAALLGGKMPHVMTSIPGGNMWVPTESKLDDLLAMATEVRDWVNDTVLADTVMLAKLYPEVLTFGKGCGRYIAWGVFEGPDWPYGDNYTEQMLNRYLPMAVLDEQFQASDVQENLITEYMGRSWYKGSETYTSPYFVTDPDFTEYNVDDRYSWVKAPAYDGKPMEAGSMARIFAAYVRGVPFIKEQVDAVLGILGAK…	[NiFe] Group 1a	[NiFe] Group 1i	Anaerobic Uptake	Sensitive	3	[NiFe]-centre, 3 x [4Fe4S] clusters	Cytochrome b	10.0855	6.00747	34.4955	21.7	2.82617	20.2317	3.83725	8.76577	1.83881	9.19119	10.2659	3.25196	0	0	0.521209	0	0	0.460833	36.29	0	36.3331	5.82054	1.432	5.34784	1.24613	23.1068	13.977	6.47175	0.377317	14.2826	11.4659	3.69641	9.59917	0	21.1745	9.51988	21.6858	8.51876	10.328	0	18.6518
WP_012803243.1	MARTVIDPITRIEGHLRVEMEVNDGMVTDAWVSGGCFRGMELVVRDRTPEDAAMIVQRICGVCPVSHAHSASIAGEKAYGITISNNARIIRNLVEAAQFMHSNILWFYNLAALDYVNPLNALTANVADAYDLAQAAGTSTMSDLGAVKKKLQTFAANKQLSIFSGNWFDAENNDGYQLTPELDLICTAHYLEALRMQAKASEIAGLLGGKMPHIMTSTVGGTMFVPTEEKLDDLWALVNELYDWVEATMLPDTLAIAPYYADAFEFGRGCGRYIAWGVFDDTSFDMTKRYLPAGVLNDGFALEEVNEDAISEYVGHSWYEGSSDLNPREGETKAEFTSYDVADRYSWVKAPTYNGKAMEATSMSRMLVAYKRGVPFIVEHVDALLEALGAPGRIDIVPS…	[NiFe] Group 1a	[NiFe] Group 1i	Anaerobic Uptake	Sensitive	3	[NiFe]-centre, 3 x [4Fe4S] clusters	Cytochrome b	0.453703	0.0556555	0	0	0	0.459812	0.479656	0	2.29851	0	0	1.62598	0	0	1.04242	0	0	0	0	0	0	1.23841	0	0	0.249226	1.07474	0	0	1.13195	0	0.171133	0	1.59986	0	0	0	0	3.09773	0.86067	0.543267	2.57266
WP_026485852.1	MDKVSVTIDGVKVEVPKNYTILQAAKEAGVDIPTLCYLKGINEIGACRICVVEVQGAKALQASCVAPVSDGMVVRTNTPVVREARKATLELILSDHDRSCLTCIRNGNCELQALANEFNISELRFEGARHQSEIDDLSASIVRNSNKCVLCRRCVSMCSNVQTVNAIGVNERGFRSVVSPIYGMSLADSPCINCGQCVISCPTGALYEKDHTARVWEALADPEKYVVAQTAPAVRVALGEEFGMPIGTRVTGKMVAALKRLGFDKVFDTNFGADLTIMEEGNELLHRLKNGGKLPMITSCSPGWVKFCEHYYPEFLDNLSTCKSPHQMLGAIIKSYYAEKMGIDPSKIYVVSIMPCTAKKFEIDRPEMEHDGLRDVDAVLTTRELARMIKEANINFNRL…	[FeFe] Group A3	[FeFe] Group A3	Bifurcating	Labile	4	[FeFe]-centre, 3 x [4Fe4S] clusters, 1 x [2Fe2S] cluster	NADH dehydrogenase, thioredoxin, thioredoxin	3.11177	1.5484	2.05943	1.55	11.3047	6.89717	6.23553	4.38288	7.81493	10.1103	3.42196	3.25196	0	0	9.90297	0	2.99768	0.921666	0	0	2.27082	7.1828	14.32	0	1.74458	2.14947	0.698849	0	4.15049	1.47751	0.5134	4.62051	0.799931	0.339987	5.29362	0.594992	0	2.3233	6.02469	1.08653	6.43165
WP_019893070.1	MRGVYNSVTDIRRKVFAAIAEMAYEEDVNYTERLESIPYEIIEGKQAKYRDSIFLERAIIGERLRLGMGLPVRDITTAGAISDGVEESIIAEKFYDQPLINIISFACHACPEKKVMVTDGCQGCLSHQCVEVCPKKAVSIVNGRSEINQDLCIKCGKCQDVCPYNAIIKIERPCAASCGMNAITSDEDGKAKINYDKCVSCGQCLVNCPFGAIVDKGQIFQTIYAMREHEVIAAVAPAFIGQFGANVTPEQVIGGLKELGFADVVEVAIGADLCTIEEAEDFLKKVPEELDFMATSCCPAWSVLAKKEFPQFKDNISMALTPMVLTARMIKKDHPNAKVCFIGPCAAKKLEASRRSIRSDVDFVLTFEEVMGMFSAKKIDLPTITCEETFDKATAAGRE…	[FeFe] Group B	[FeFe] Group B	Evolving	Labile	1	[FeFe]-centre, 2 x [4Fe4S] clusters	None	19.8477	11.7789	11.8417	13.95	18.3701	21.1513	54.6808	25.2016	18.8478	17.4633	17.1098	30.8936	19.9148	20.9641	19.8059	2.6909	2.99768	19.355	9.0725	3.14915	5.90413	11.2696	15.752	16.0435	13.209	24.1816	14.6758	76.7365	16.9793	12.3126	8.55666	10.6272	86.3925	12.5795	20.1158	6.54492	20.3847	18.5864	74.4479	18.4711	7.07481
WP_028533896.1	MKAQINGKEYSFESSDTILKLARRNGIYIPTLCELHDTGHAPGTCRVCMVEVRTEGAEAAYVTACDTPLQDGARIYTRTPKVQELRRMQLDLMMGDHNQDCASCSRHGACELIDVADAVGLKKSSISIQPLQTAPCEAADSAVVYDQSRCIRCMRCVSICRDTQGVDALEVSGRGVNSAIVIKDGKTRNESDCVSCGQCVMVCPTGALSERDQTQEVIDYLADPKIVTVFQIAPSIRVGFGEEFGLEPGGNVEGKVVAALRAIGADVILDTNFAADVVIMEEGTEVLGRVTRSEGTTFTSCCPGWVDFAEKNFPQILPMLSSTRSPQQVLGSLAKTYLPNKMDIDPARIRVVSIMPCTAKKNEAARPELGKDGIPDVDIVLTIREFARLLRREGVDLRE…	[FeFe] Group A2	[FeFe] Group A2	Evolving	Labile	2	[FeFe]-centre, 3 x [4Fe4S] clusters, 1 x [2Fe2S] cluster	NADH-dependent glutamate synthase	0.576007	0.160263	0.514858	0	0	0.459812	0	0	0.919403	0	0	0	1.37344	0	2.60604	0	0	0.460833	0	0	0	0.247683	1.432	0	0.747678	0.537368	0.698849	0	1.50927	0	0.342266	2.31025	1.59986	0.339987	1.05872	0.594992	0.433716	0	0	5.43267	0
WP_021432477.1	MKHLFTEKVVPIELDNPSIQIDFDKCIKCGLCKRVCENEIGVNGYFDLEKTGDIAICINCGQCVQACPKKAITQVIDVDRVKEAINDPEKIVIFSTAPAVRVALGEEFNLEEGAYVEDKMVDALRKLGGDYVFDVTFGADMTIMEEANELVSRIKNGKGKTPQFTSCCPSWVKFAETFYPELIPNLSTTKSPIGIQGAVIKTYFAQKANIDPEKIVNVTITPCTAKKYEIDRPEMNASAKYNKSENMRDNDIILTTKELAQWLRDEEIDFNALEGSKFDNILGLGSGAGIIFGNSGGVMEAAVRTVYNILTHENPHKELLHFNPVRGLEDVKEATLTIGDTTLRLAAVQGTANVRTLIEKLKSGEVEYDFIEVMTCKGGCIGGAGQPKMKARISNEMRL…	[FeFe] Group A1	[FeFe] Group A1	Evolving	Labile	1	[FeFe]-centre, 2 x [4Fe4S] clusters	None	0.856869	1.32481	0	0	5.65234	0.459812	1.91862	7.67005	0.459702	0.919119	0	0	0	0	1.56363	0	0	0.460833	0	0	0	0.495365	1.432	0	0.498452	1.61211	2.09655	0.924536	0.377317	0	0.171133	0.462051	0	0	0	0	0.433716	3.09773	0	5.43267	0
WP_027202827.1	MQLRPIYTEPDNCQDCYKCIRECPVKAIRMENNQASIIEDRCIYCGHCTQVCPTGAKKIRDGLTRAKLTLTQNPKVILSLAPSYVSEFEGVHSSVLIAAIKRLGFTSVSETALGAEIVTDRTEKFLEEAESGVYISSACPVVVEYIRKYSPDHVRFITPIISPMLAHAKILNQLYGEDVKIVFAGPCICKKLEADYFNNLVDVVITFKDLKKWFEQSDINLKNIAPNQPEARFVPYRSGMGAYYPIEGGMLKGMQEGKKQIHHMAFSELSTVKDVLKELDSHREDDSIFLELLACKGGCINGPAKLSHISPALKRYEIIHQSELGNPKDDFKNIDLQILFCKDPHVQDHTYTEEEIKQAMAVVGKTGPEDELNCSGCGYDSCRDFAIAMLEGRAEENMC…	[FeFe] Group C	[FeFe] Group C3	Sensory	Labile	3	[FeFe]-centre, 2 x [4Fe4S] clusters, PAS domain	Phosphatase, thioredoxin	1.87388	0.845194	0	0	0	1.37943	1.43897	1.09572	3.67761	3.67647	0.684393	9.75588	0.686718	0	0	0	0	0.460833	0	0	0	4.08676	1.432	0	0.498452	0	0	0	0	1.97001	0.342266	0	0	0	3.17617	0	0	2.3233	1.72134	3.2596	0
WP_021739962.1	MNKFFHSVYLDSDKCTGCITCLKRCPTQAIRVRDGKAHIINEFCIDCGECIRHCPHHAKHTKRDFIPVLKDYKYTVALPAPSLYSQFNNVKDTNIILTALVLAGFDDVFEVSAGAEIISELSRKYISEHPELYPLISTACPTVERLIRVRFPGLIPHLLPILPPMEAAAIIARKRAAAKTGLDPSDIGIIFLSPCPSKITFIYDPLGMRESNVDAVLAIKDIYPLLLSHMKEAQKQLENKVSYTLSGRIGKGWAISGGEAYGIISDHYLAADGIENVIRVLEDLEDEKILPGLQFVELNACSAGCVGGVLTVENPYIAKAKVKQSSKYEPVLRMHCADFQEEPPEIFGWTEPVAYEPVYTLGANIFESMEKILESQEILKELPGLDCGSCGSPTCKALA…	[FeFe] Group C	[FeFe] Group C1	Sensory	Labile	2	[FeFe]-centre, 2 x [4Fe4S] clusters, PAS domain	Histidine kinase	8.89332	5.30638	7.72287	23.25	8.47851	14.2542	5.75587	1.09572	14.2507	0	11.6347	0	4.12031	4.6587	2.60604	6.99634	2.99768	1.3825	16.6329	9.44746	32.2456	5.32518	7.16001	10.6957	16.9474	2.14947	4.19309	2.77361	6.79171	19.7001	14.7175	8.77897	3.99965	4.75982	6.35234	5.94992	24.2881	0	9.8977	2.17307	18.6518
WP_014080084.1	MAGYVYTNENCIGCNRCISVCPVLTANQAVVVDGKPRIEVNHAQCINCGACFDACEHQAREYADDTEQFFADLQRGESISLLLAPAFLANYPREYEQILGGLRQMGAKRIISVSFGADITTWAYINYITKNQFTGGISQPCPAVVNYIEMYAPELLPKLMPVHSPMMCAAIYAKKYLHITDKLAFISPCIAKKNEISDPDTDGYVSYNVTFDHLMDYCRKHRISGPGVSDEIEYGLGSIYPMPGGLKENVYWFCGEDVFIRQIEGERHVYEFLDAYRKRVAEHKELPFMVDALNCAMGCIYGTGVEPEKTAGDDVLYELHKIREKSKKVKGPWARSATSKQRLAQLNRQFAQLEPADFTRRYTDRSKGNEIRVPEGQELEAVYSRLNKQTAMDRAIDCS…	[FeFe] Group C	[FeFe] Group C2	Sensory	Labile	1	[FeFe]-centre, 2 x [4Fe4S] clusters, PAS domain	Fusion with methyl-accepting chemotaxis protein	23.0897	14.709	18.5349	24.8	83.3721	12.8747	31.6573	13.1487	29.8806	5.51471	10.9503	9.75588	13.0476	11.6467	48.4724	31.2144	20.9838	40.0925	40.8262	15.7458	22.7082	42.3537	47.2561	19.6088	24.4242	13.4342	11.8804	18.4907	4.15049	23.1476	14.3752	47.1292	4.79958	12.9195	20.1158	32.7246	4.77088	6.19546	7.31569	7.06247	9.64747
WP_005348317.1	MVNIKINDVPISVEEGTTILEACREAKMIVPTLCYLKDINEIGACRVCVVEIKGIERLVTSCNNTVKEGMEIYTNSPKVRDARRINIKLILSQHNCFCPTCVRSGNCQLQKVANDLEFGSGTFKQHITEEKWPMDFPLIRDESKCIKCMRCIQICDKVQSLKVWDIAKTGSRTTVNVSLGRNIKEADCALCGQCITHCPVAALSGRDDKRPVFSQNGMLNTRRKTTVVQVAPAVRTAWAEAFKLSRKFASPERLAGALRLMGFDYVFDTTYAADLTIMEEGSEFLERLKHKEDYQWPMFTSCCPGWVRFLKSQYPDMVDCLSTAKSPQQMQGAIIKNYFADKIHEDPENIFSVSIMPCIAKKAECALPTMDSTGTGPDVDVVLNTREFVDYMKSLNIDV…	[FeFe] Group A2	[FeFe] Group A2	Evolving	Labile	2	[FeFe]-centre, 3 x [4Fe4S] clusters, 1 x [2Fe2S] cluster	NADH-dependent glutamate synthase	83.732	53.6612	60.2384	43.3999	105.981	91.9623	105.045	52.5946	114.006	29.4118	26.0069	71.5431	705.259	69.8804	39.6119	42.5162	32.9745	57.6041	78.6283	72.4305	81.2953	68.6081	20.048	201.435	19.4396	178.944	83.163	141.454	67.1625	131.498	24.3009	65.6112	80.793	2.7199	91.0503	141.608	53.3471	131.653	110.166	81.49	102.263
WP_009165839.1	MVNVVIDGKRIKVPERTTILDAAKAAGIRIPTLCFLEGVNEIGACRVCVVEVEGHERLFTACNNPVEESMVIHTNSKKAREARRANVRMILSEHDDHCPSCVRSGNCELQRIANELNIHDTPFEKHYVSRRTSPDFPLIRDFSLCIKCMRCVQVCDKIQHANVWDVVNTGAKTTVDVARVYRLEDADCALCGQCITHCPVGALHERDDTQKVLDAIDDPEKIVLVQIAPAIRTAWGEEFGMKPGEATVTRLAAALRLVGFDYVFDTNFSADLTIMEEGSEFVERLKHRDREKFPMFTSCCPGWIRFVKSHWPQFVGQLSSAKSPQQMFGAVAKSWYAQTLGVDPSRIFSVSIMPCLAKKAECALPGMDGAGAGQDVDVALTTREVSRLIRSLQIQPQDL…	[FeFe] Group A2	[FeFe] Group A2	Evolving	Labile	2	[FeFe]-centre, 3 x [4Fe4S] clusters, 1 x [2Fe2S] cluster	NADH-dependent glutamate synthase	3.35558	1.82607	1.54457	10.075	0	0.459812	2.39828	1.09572	5.51642	0	3.42196	4.87794	4.12031	2.32935	4.16967	0	0	9.21666	0	0	0.908327	3.34372	15.752	5.34784	9.47059	7.52316	2.79539	5.54721	2.2639	3.44752	8.89893	5.54461	1.59986	6.79975	4.2349	1.78498	0.433716	2.3233	2.15167	4.34613	0.643165
WP_007748547.1	MAFTNNIMIVRHKLLADLVRLWKNDQLIEKIDRLPVELSPRRSKPMGRCCIHKERAVWRYKTFPLMGLDMTDEHDEVAPLSDYARMALSRPEPNKENIMCVIDEACSSCVQINYEITNLCRGCVARSCYMNCPKDAIRFKKNGQAMIDHDTCVSCGICHKSCPYHAIVYIPVPCEESCPVKAISKDEHGIEHIDESKCIYCGKCLNACPFGAIFEISQTFDVLQHIRKGEKLVAIVAPSILGQFNTTIEKVYGAFKEIGFADVIEVAEGAMQTTSNEAHELLEKLEEGQKFMTTSCCPSYIELVEKHIPGMKPYVSSTGSPMYYAARIAKEKHPDAKIVFVGPCIAKRKEVRRDEAVDYILTFEEIGSILDGFDIQLEQMQEFSILHTSVREAHGFAQA…	[FeFe] Group B	[FeFe] Group B	Evolving	Labile	1	[FeFe]-centre, 3 x [4Fe4S] clusters, 1 x [2Fe2S] cluster	None	4.09794	2.26397	0	8.52498	11.3047	0	0	0	0.459702	55.1471	1.36879	6.50392	13.0476	0	0	0	0	0	15.1208	0	0	12.1364	0	0	8.47369	0	1.3977	0	6.03708	0	3.0804	0.462051	0	0	0	0	0	0	0	26.0768	0
WP_013486531.1	MILFDTDVQELKYKVLREVVRLARADKLDDGYYDIPRTIIPGPKATMRCCIYRERAIVEERVRAAMGRGDMPGIVSVIDSACDECPVQRFSVTDACRGCIAHKCHAACPFGAISYEKHRAVIDPEKCRECGRCMKACPYHAIIERQRPCVAGCAAKAIEIDDQKKAKINYDRCTSCGNCVYQCPFGAMVDKSFILDVLDLLRQAQENPDLHIYAVLAPAIASQFSYAKIGQVVAGIRQLGFHRAVEAALGADIVAQKEAHELAEKGFLTSSCCPSFVRYVEINHPDLKPFISHNVSPMVETALLIKHHDPGAKVVFIGPCIAKKMEISLEKTQGAVDSVLTFEELQALFDGMEIPVDQLEEGPMDDASCFGRAFARSGGVTEAVRSVIEDEGLDLVLDP…	[FeFe] Group B	[FeFe] Group B	Evolving	Labile	1	[FeFe]-centre, 3 x [4Fe4S] clusters, 1 x [2Fe2S] cluster	None	0.703182	0.297548	0	1.55	0	0	1.43897	0	0.459702	1.83824	0	0	2.74687	0	1.56363	0	0	0.921666	0	3.14915	0	0.371524	0	1.78261	0.249226	0.537368	0	2.77361	0	0	0	3.69641	0	0	0	0.594992	0	0.774432	0	1.08653	0
WP_023388270.1	MDMVHVKINNKEIMVPKGATILQAARELNINIPTLCHLDLHNIKMVNKGASCRVCVVEVEGRRNLAPACSTPVFEGMVIKTDSMRAIKSRRTMVELLISDHPKDCLVCLKNQDCELQQLAADLGVRNIRYSGEMSTYPVDAASKAIYRDLSKCVLCRRCETMCNDVQTVYALSGVGRGFDTVVGPAFNAPMHKTVCTFCGQCVAVCPTGALVEVDNVPKVWDLLENKKKTVVVQVAPAVRVALGELFGLAPGTIVTGKMVSALKTLGFDFVFDTDFAADLTIMEEAHELIERVTEGTNLPILTSCCPAWVKFFEHQFPDLLNIPSTCKSPHEMFGAVTKTYLASKLGLKREDMVVVSVMPCVAKKYEAARPELESKGLQDVDVVITTRELGRMIKEAGI…	[FeFe] Group A3	[FeFe] Group A3	Bifurcating	Labile	3	[FeFe]-centre, 3 x [4Fe4S] clusters, 1 x [2Fe2S] cluster	NADH dehydrogenase, thioredoxin	0.913134	0.424624	0.514858	0	2.82617	1.37943	1.43897	0	2.29851	4.59559	4.79075	0	0	0	1.04242	0	0	0	0	0	0.908327	0.123841	2.864	0	0	1.61211	0.698849	0	0.377317	0.985006	0.342266	2.31025	3.99965	0.339987	1.05872	0.594992	0.433716	2.3233	0	1.6298	0
WP_012862884.1	MSYISVKSLNCKNCYKCLKYCTVKSIKYRNDKVEVIDEKCILCGECINICPQEAKKVISDIDKVKELVTNKNVKKIVSIAPSYISAYPDKNKLVSGLLKLGFDGVEETAVGAAYVTEEYKKLINKMEMDNILTSCCPTINLMISKYSPELINNLAPVLSPVLVHGKLIKEKYGPETSVIFIGPCLSKIYEINQDEDSRNVDFAITFQDLDKWLLDENINLETITPKEFDTDSPYSRVYPISQGILYDLKNHFKDKDSGDKISKYDLLSVSGLKDVENILNEISNGKIKNVFIEINACSNGCVNGPMMPKNRTSVLEDTIKIKRYAEEIKDNENKFDRNDLNKKFFNEKIEDFIPGEDKLKDILMQIGKIKKDDELNCGSCGYDTCRDKAIAVYQGKAEL…	[FeFe] Group C	[FeFe] Group C3	Sensory	Labile	2	[FeFe]-centre, 2 x [4Fe4S] clusters, PAS domain	Phosphatase	1.40417	0.595962	1.02972	0.774999	1.41309	2.29906	0.479656	2.19144	0	1.83824	6.84393	0	0	0	1.04242	0	0	0.460833	3.02417	0	1.36249	0.866889	2.864	0	2.49226	0	0	1.84907	1.50927	0.985006	1.19793	1.38615	0	0	1.05872	2.37997	0.867433	1.54886	0.86067	2.17307	0.643165
WP_021718870.1	MKVKPEGLRGAANICSRGGRHPLTAMFGADETSFGGGYAVYCLFENKEKHDIDILKAEFDAGSDLHYPALTPVLPAAAWYERELHDMFGFIPDDHPDLRPLVLHETYPEDFHPLRKCVDIDADVRGERKYEMAVSHGDGLFEVPVGPIHAGIIEPGHFRFSQAGEAILQLDAKLFFTHRGIEKAVEGKTPEEALLIVERICGACSVANTLSYCQALEKLSGQNVPRRAWLIRTIAAELERLYNHIGDIGNMCAGVGFAPVISMGSRLKEILLRCNEAIAGNRFLRGLIVPGGVKYDLTESLCTELTVTLNKVENEYNDIVQIIAEQDGFLNRAKTTGIISKNVALDLALVGVGARASGVDCDCRRDLPYGLYAELPFNVITKTDGDVYARLQVRMGEVA…	[NiFe] Group 4f	[NiFe] Group 4f	Evolving	Sensitive	6	[NiFe]-centre, 1 x [4Fe4S] clusters	NuoL, NuoH, two antiporter subunits	20.313	12.733	0	0	121.525	0	1.91862	20.8187	9.19403	125	5.47514	11.3819	139.404	0	0	23.1417	41.9676	50.6916	84.6766	44.0881	0	7.05895	1.432	0	40.8731	19.3453	30.0505	20.3398	1.50927	0	27.7236	0	0	0	0	0	0	0	0	0	0
WP_013778939.1	MDMVTLTIDGIKVQAPKDATVLEAARKAGIRIPTLCFLKGVNEIGACRMCVVEVKGAKSLQTACVLPVSDGMEVITNSAAVRESRKVTLELLLSDHNLECPTCIRNLNCELQKLSEELGVQAIRYPGEKSKAQYDDFSPSIVRDTSKCILCRRCVSTCHKVQGVGVISPNYRGFNTVIAPVYDMSLSEVSCVNCGQCIMACPVGALKEKDDTDKVWKALADPEKYVIVQTAPAIRVSLGEEFGGELGTIVTKKLPAALRRLGFDKVFDTDFSADLTILEEGSEFLDRLQNGGKLPLITSCSPGWIKFCEHYYPEFLDNLSTCKSPQQMFGALVKTYYAEKMGIDPSKIFSVSIMPCTAKKYECKRPEMFSSGYQDVDVALTTRELSRMLKEAGINPNKL…	[FeFe] Group A3	[FeFe] Group A3	Bifurcating	Labile	3	[FeFe]-centre, 3 x [4Fe4S] clusters, 1 x [2Fe2S] cluster	NADH dehydrogenase, thioredoxin	1.34747	0.766179	1.02972	0.774999	4.23926	0.459812	0	1.09572	2.29851	1.83824	1.36879	0	2.06015	0	4.16967	1.07636	0	2.765	0	0	0.454164	2.47683	4.29601	0	2.24303	2.68684	0.698849	0	0.377317	0.985006	1.0268	2.31025	0.799931	0.339987	2.11745	0	0.433716	2.3233	0.430335	0.543267	0
WP_010939059.1	MNAFINGKEVRCEPGRTILEAARENGHFIPTLCELADIGHAPGTCRVCLVEIWRDKEAGPQIVTSCTTPVEEGMRIFTRTPEVRRMQRLQVELLLADHDHDCAACARHGDCELQDVAQFVGLTGTRHHFPDYARSRTRDVSSPSVVRDMGKCIRCLRCVAVCRNVQGVDALVVTGNGIGTEIGLRHNRSQSASDCVGCGQCTLVCPVGALAGRDDVERVIDYLYDPEIVTVFQFAPAVRVGLGEEFGLPPGSSVEGQVPTALRLLGADVVLDTNFAADLVIMEEGTELLQRLRGGAKLPLFTSCCPGWVNFAEKHLPDILPHVSTTRSPQQCLGALAKTYLARTMNVAPERMRVVSLMPCTAKKEEAARPEFRRDGVRDVDAVLTTREFARLLRREGID…	[FeFe] Group A2	[FeFe] Group A2	Evolving	Labile	2	[FeFe]-centre, 3 x [4Fe4S] clusters, 1 x [2Fe2S] cluster	NADH-dependent glutamate synthase	0.779702	1.10351	1.54457	0	2.82617	0.459812	0	0	0.459702	1.83824	0	0	0	0	0.521209	0	0	0	1.51208	0	1.81665	0.247683	2.864	14.2609	2.74149	0.537368	0	0	0	0	0.171133	0.462051	1.59986	0	0	0	0	1.54886	0.86067	0	0.643165
WP_022739883.1	MSKATVIPFGPQHPVLPEPLHLDLVVQDETVVDVLPQIGFVHRGLEKLVETRDYNQFIYIAERICGICAMGHSLGYAETVESLMGVEVPKRAEYLRVIWHELSRIHSHLLWLGLAADAFGFESMFMHCWRLRERVLDLFEKTTGGRVILSVVKVGGVVRDIDANQMAEIVSVLDGIKDEYTQIMNTLLTDTSVKNRTVGVGHITTEDAAALSMVGPFARASNLPYDVRSFGRGAYGDLADFAPITATEGDCYARVKVRCLEVLQSIEIIKELGAKIPAGDIEVAVKGAPADGAQASNVLEQPRGECYYYARGNGSKNLERMRMRTPTSQNLAGMTVALKGCDLADVNMIILTIDPCISCTER	[NiFe] Group 4e	[NiFe] Group 4e	Evolving	Sensitive	6	[NiFe]-centre, 1 x [4Fe4S] clusters	NuoL, NuoH, NuoC, [FeS] protein	6.32687	3.84703	12.8715	10.85	1.41309	9.19623	0.959312	4.38288	1.83881	5.51471	6.15953	6.50392	0.686718	0	2.08484	1.61454	2.99768	1.3825	19.6571	0	24.0707	3.5914	1.432	7.13046	0.498452	23.1068	6.98849	1.84907	1.13195	8.37255	7.52986	1.8482	7.19937	0	16.9396	5.94992	13.0115	3.09773	2.58201	0	8.36114
WP_014115957.1	MRGIHSAVDDIRRNVFTEVARLAYEGGDYSRIDLIPYKIVPGEESQYRSNVFLARAIVQERLRLACGLPLQPVNVRAPASAGIEEAAAADDKFFEEPLVNVITFACNACPPKQVRVTDSCQGCMSHPCQVVCPKDAIYLDAQKRSHIDQSKCIKCGKCVNQCPYHAITKIERPCAAACGMDAIESDEKGRAKINYNKCVSCGMCLVNCPFAAIADKSQIFQIINAMKRHNKLIACVAPAFVSQFGKEVSPAKLKAAMRLCGFADVVEVAIGADLCTIEEAGDFLENVPKNQPFMGTSCCPAWSVMAKKLFPEFKDYISMALTPMVITARLVKKRYPDARICFIGPCAAKKLEANRKSVRSDVDYVLTFEELQGMFDAKDIDFSQLPEDPADDFTIGTGA…	[FeFe] Group B	[FeFe] Group B	Evolving	Labile	1	[FeFe]-centre, 2 x [4Fe4S] clusters	None	18.2883	11.2034	6.69316	34.8749	21.1963	18.8523	10.0728	5.4786	25.2836	16.5441	13.0035	17.8858	37.7695	18.6348	14.5939	4.84362	8.99305	9.67749	19.6571	6.29831	3.17915	34.4279	54.4161	24.9566	38.1316	11.2847	20.2666	15.7171	4.90513	12.8051	15.2309	9.24102	5.59951	12.2395	16.9396	6.54492	8.24061	19.3608	8.6067	28.7931	5.78848
WP_027717491.1	MQPYFHSVRLDENKCKGCTNCIKRCPTEAIRVRKGRARIIEERCIDCGECIRVCPNQAKLAITDSLERLGEFRYTVALPAPSFLAQFKSEVAPEKVWGGLLTLGFDEVFEVALAAEAVSWAIREYLQSNPDRPRPLISSACPAVVRLIQVRFPSLLGHIIPIESPMEIAGRLARERVCRMTGFPGHQVGTFFITPCPAKVTEVKQPFGGISSVDGAISMSDLYGALLRRLETAKAYPLPLRASGLGIGWGRAGGENEAIRAGSLLAVDGIHNVIGVLEEIERGGLADIDYLEAQACTGGCIGGPLVPQNPFVARVRMGNLVKSHRSQEEWDFPRELGFYHRKVSISARPALKLAEDPQLALARLEEAEKISRELPGLDCGSCGSPSCRALAEDIVQGYA…	[FeFe] Group C	[FeFe] Group C1	Sensory	Labile	2	[FeFe]-centre, 2 x [4Fe4S] clusters, PAS domain	Histidine kinase	0.859817	0.356674	0	0	1.41309	0	0	0	0	0.919119	4.79075	0	0.686718	2.32935	1.56363	0	0	1.3825	0	0	0.454164	0.247683	4.29601	0	5.23375	0	0	0	0	1.97001	0.171133	0.462051	0	0	0	1.18998	1.30115	0	0.430335	0	0
WP_029504843.1	MNNDKTFMLNSPLGSIFPNFREDDLKEISKNDKNLVAVSGKVKKPGIVPLTSKTTLRDIIELSGGMLNDKPYKAAQLGLPFGGFYTKKDIDRIITTDSFIGDISHTIIILSEEDCMIQYAKFYIDYLLGKINGGFIDHYIPALPEILQMVKVLNRISKGRSNMRDIFLLRELSETVKEKVHQTYNLIEEVISYFYDEIKEHVEDNRCYTLQCNNLTKLTIMDNCIGCDKCTKVCPVDCIVGDFKEQHYIDYTRCTHCGACLSICPVSAITSGNNSILFLRDLATPNKIVITQMAPSVRVTIGEAFGFEPGANVEKKIAAGLRKLGVDYVFDTTWAADLTIMEEANELAERVKRYIAGDQEVKLPILTSCCPAWVKFIEQNYGDMLDVPSTAKSPMQMFA…	[FeFe] Group A1	[FeFe] Group A1	Evolving	Labile	1	[FeFe]-centre, 2 x [4Fe4S] clusters	None	0.785485	0.578877	0.514858	0	0	0.919623	0.479656	7.67005	0.459702	4.59559	0	0	0	0	0	0	0	0	0	0	0.454164	0.247683	0	0	0	0	0	0	0	0.492503	0	0	10.3991	0.679975	0	0.594992	3.46973	6.19546	0	1.08653	0
WP_006574746.1	MDDYIRLKKSNCKNCYKCIRNCPVKSIRFSDHQANIVPDECILCGRCFVACPQNAKEVRDDLPAARALLASGAPVYASVAPSFVAAWEGVTISSMEAALKQLGFAGAEETALGATMVKTEYEHLTAAGEQEVIVSTCCHTVNLLVQKHFPEVLPALAKVVSPMQAHCRDLKRRHPGCRTVFIGPCISKKDEAESYPGIVDCVLTFEELSAWLEQAGVTLEAGTDGNRESRARLFPTTGGILRTMAERNPDYAYLAVDGIDNCITALRDIAEGRMGKCFIEMSACPGSCIGGPAMGKNRRAAVRDFVTVDRYAGPADFLFEPLPPEKMNKRFPLLLTGQVKPGSAAIEEVLRQMGKTRPSDELNCGTCGYDTCREKAAAVLAGKADITMCLPYLKERAES…	[FeFe] Group C	[FeFe] Group C3	Sensory	Labile	3	[FeFe]-centre, 2 x [4Fe4S] clusters, PAS domain	Phosphatase, thioredoxin	7.545	5.72412	6.1783	7.74999	12.7178	10.1159	0.959312	2.19144	5.51642	20.2206	17.1098	1.62598	5.49374	2.32935	4.69088	0	11.9907	1.84333	0	0	2.72498	5.20133	5.72801	0	15.9505	8.06053	4.89194	6.47175	4.90513	19.2076	2.22473	3.23436	0.799931	0.339987	1.05872	2.37997	7.8069	3.09773	1.72134	16.298	0.643165
WP_022739737.1	MAATEISVDHIARVEGHGDIRLVIEDGRVVTCEMAVVEPARLFESMVRGRSFEEVPYIASRVCGICSSSHVVTDLRAIEQVFGVEVADRTEALRELLLYGSYLQNHGTHLFVFAAPDFLGHKSVFPLAEGNPELFERALGLKALGNELCTLVGGRSIHPITAVVGGFTHEISADEYLRLAEAMDATREFALASVDLFRDFDTVDVQTEGDLLAMVAPGAYPVCTSDTLRFVRAGYDFSAQDVEEEIEEYPVGHSAAFLARARRTGRPYMTAALARVNASWDALSKDARYAAAKAGLRPPEYNPFANNIAQAVELVDALDRCAALCRRLAADEFEGSSEPVPFTVRAGRGVGFTEAPRGALFHILDINGEGRIERASIMTPTAQNIANLEADMRQLAEKM…	[NiFe] Group 3b	[NiFe] Group 3b	Bidirectional	Tolerant	4	[NiFe]-centre, 3 x [4Fe4S] clusters	Diaphorase, [FeS] protein	11.0874	7.12257	33.9806	17.825	8.47851	22.5308	7.67449	10.9572	2.75821	3.67647	15.0566	1.62598	0.686718	0	0.521209	0.53818	0	2.30416	52.9229	0	34.5164	9.16426	4.29601	5.34784	1.24613	25.2563	18.8689	16.6416	0.377317	11.8201	12.3216	1.8482	11.199	0	30.703	10.1149	18.6498	9.29319	7.74603	0.543267	24.4403
WP_021625383.1	MVTVTIDGREIRVPERTTILDAAHEAGIEIPTLCYLKDVNEIGACRVCVVEVEGIDQLVASCNNCALDGMVVHTDTPKVRQARKVNTELLLSQHDSECTSCVRSGNCSLQSFANDLGLVGLPYEKHLPDIEWDQNFPLIRNNDKCINCLRCIQICDRVQDCHVWDLANRAAHTSVNVIGGLPIDSVACALCGQCITHCPTGALRERDDTDRVWEALEDPDITTIVQIAPSVRTAWGDHWGMSNKEATVERLVACLRPMGFDYIINTDFSADLTIMEEGTELLERLKEGPHDHPMFTSCCPGWVRYVKSHYPELVDDVSTSKSPQQMFGAIIKSYYAEKLGVDPHKIFSISIMPCVAKKSECALPTMNDACGDPDVDVVLTVREVDRMIRSEHIDPRRLE…	[FeFe] Group A2	[FeFe] Group A2	Evolving	Labile	2	[FeFe]-centre, 3 x [4Fe4S] clusters, 1 x [2Fe2S] cluster	NADH-dependent glutamate synthase	3.73516	2.16908	2.57429	4.64999	12.7178	3.67849	3.83725	0	4.59702	11.9485	8.89711	0	4.12031	0	5.21209	0.53818	0	1.84333	1.51208	0	0.908327	4.33445	10.024	5.34784	10.7167	10.21	2.09655	4.62268	3.77317	0.492503	1.71133	4.62051	5.59951	2.03992	0	2.37997	0.867433	19.3608	3.44268	12.4951	0.643165
WP_027207458.1	MRGIYTSVNDIRKRVFTEVARLSYNYKDGDLSEMEMIPYRIIPGEESKYRESVFLERAIVKERMRLAMGLSLRSAAEHAPVSTGAEECVKPEKYYQPPLINIIKFACNKCPDNVVTVSNQCQACLAHPCHEVCPRDAIKFDHGKSVIDQEKCIKCGRCIEVCPYNAIIRMERPCSKACGVKAIGTDEHGRADIDYDKCVSCGMCLANCPFGAIADKAQIFQTIQAIKSDTPVYAAIAPAIVGQFGPDLTLDKMRYAFKALGFEDAVEVAIGADLCTLQEADDFIKEVPEKLPFMGTSCCPAWSAMAKRDFPEQANCISMALTPMVLTGRLLKQQHPDCKIAFIGPCAAKKLEAMRKSVRSDIDFVLTFEEVMGMFEAKGVNFAEFETHNTMHGGSGDGR…	[FeFe] Group B	[FeFe] Group B	Evolving	Labile	1	[FeFe]-centre, 2 x [4Fe4S] clusters	None	29.0033	18.2118	13.9012	27.8999	19.7832	40.0036	47.4859	25.2016	33.5582	22.978	21.2162	21.1377	81.0327	41.9283	26.5817	2.6909	8.99305	43.7791	22.6812	14.1712	23.1624	17.3378	24.344	60.6089	13.209	27.9432	16.0735	28.6606	30.94	42.8478	18.4824	30.4954	21.5981	21.7592	32.8204	17.8498	40.3356	49.5637	46.0458	16.298	34.7309
WP_026327676.1	MKIMIELTIDSKKVQVEEGTTILKAARKAGVEIPTLCHFELCDMGIENKPGGCRICVVEVEGRRNLAPSCMTEAQNGMVIHTHNIRVLNARTTVLKLIISDHPFDCLVCAKSGQCELQSLAIQFGIRSQPYEGEQSRYRKDTSPSIIRDVDKCIMCRRCEMMCNEVQTVGALAAVNRGFMSVVAPAFEMNLEDSPCTYCGQCVSVCPTGALTEVDHTNDIIRALSDPTKTVVVQTAPAVRAALGEEFDLPPGTLVTGKMVSALRELGFDYIFDTDFSADLTIMEEGTELLQRLQRYLAGDTEVRLPILTSCCPGWVNFFEHNFPDLLDVPSTAKSPQQMFGAIAKSYFAEKIGVSRKDMIVVSIMPCLAKKYECQRDEFKADGNPDVDYSISTRELAAF…	[FeFe] Group A3	[FeFe] Group A3	Bifurcating	Labile	2	[FeFe]-centre, 3 x [4Fe4S] clusters, 1 x [2Fe2S] cluster	NADH dehydrogenase	0.747173	0.269443	1.54457	1.55	5.65234	1.37943	0	1.09572	1.3791	2.75736	0	0	1.37344	0	1.04242	0	0	0.921666	0	0	0	1.4861	0	0	0.996904	1.61211	0	0	0.377317	0	0.342266	0.462051	0.799931	0	0	0	0	5.42103	0.430335	3.2596	1.28633
WP_015869123.1	MRNVITTELTKLRRQIYIKLLQKIISGKYNEIPKISKEIIKEGSIPQGQDVYKTKITIDETIKIILGTDYSKTKDLELYELIPEMEAILKGESPLMNKSGKVINIIREICDGCPLPSYHITDMCRNCSAKYCINSCPRNAIPIVDGKPKIDSEKCVGCGLCAKNCPYGAIIKIQRPCVSACAVGATYSDENGFVLIDDEKCVQCGECAVACPFGAIVESSSIGQVAVRLGKEPMVAIFAPASVAQFGPRVSLGQFKKALKEVGFVDAFEVAIGADMVAKEEAEYVEENLERLGFITTSCCPAFKRMIETRFPELVEHISPSLSPMHMLAKKIKEDYPNAKVVFIGPCIAKKYEVTLQPYTDYALTYEEIASIFAVKGIEPANVEEEELNNATPYGRLFA…	[FeFe] Group B	[FeFe] Group B	Evolving	Labile	1	[FeFe]-centre, 2 x [4Fe4S] clusters	None	2.68046	2.15037	2.57429	3.09999	1.41309	5.51774	2.87794	1.09572	3.21791	1.83824	0.684393	0	16.4812	0	2.60604	1.07636	0	0.921666	0	0	0.908327	0.743048	2.864	7.13046	1.49536	5.91105	2.09655	3.69814	3.01854	3.94002	0.171133	0.924102	3.19972	0	7.41107	1.18998	4.33716	3.09773	2.15167	7.06247	2.57266
WP_028308066.1	MELVSLKIDNRLVEVHPGATILEAAEIAGVNIPTLCYMKDINKVGACRICVVEVVGARTLAAACVVPVAQGMEVLTNTEKVRNARKFNLELLLSDHDVECLTCIRNQNCELQKMAELLGVRDMRFVGKRNLSAKDMSTPALIRDPQKCILCRRCVSVCKQVQSVEAIVPLGRGFKTLIGTQFNEALSYSVCVQCGQCVLVCPTGALVEKENTEEVWKALSDPRKHVVVQTAPATRVSIGQEFGLEPGTVSTGQMVAALKLIGFDKVMDTDFTADLTIMEEGSELIERLTNNGTLPMITSCSPGWIKFIEHFYPELTEHLSTCKSPQQMFGALLKTYYAEKVKIDPADIVSVSIMPCTAKKFEADRPEMTDSGYTDVDYVLTTRELARMFKQAGIQLNKL…	[FeFe] Group A3	[FeFe] Group A3	Bifurcating	Labile	3	[FeFe]-centre, 3 x [4Fe4S] clusters, 1 x [2Fe2S] cluster	NADH dehydrogenase, thioredoxin	1.0826	0.557097	0.514858	0	1.41309	0.459812	0	0	1.3791	6.43383	3.42196	0	0	0	2.08484	0	2.99768	0.921666	0	0	0.454164	0.371524	0	1.78261	3.48917	1.07474	0	0.924536	0.754635	2.46252	1.5402	1.8482	0.799931	0	0	0.594992	1.73487	0.774432	0.430335	1.08653	0.643165
WP_022349360.1	MEAIPQIGFVHRGLEKLVQKRDFNQFVYVAERVCGICSFGHGYGYASATEKLMGIEIPRRAEYLRVILEELSRCHSHLLWLGLLADAFGFEALFNHCWRLRETVLDIFQRTCGARIILSITIVGGMAHDISDEDLKWVCEQLEGLKREYREIVDTMFNDVTVRERLCGVGYISFEDALELSMVGPFAKGSGIEHDMRTTGYGAYGDLEHFEPIISTECDCYARCKVRCEEVFQSIDIIEELVKKIPHDGIGGKPKAKVVPEGQSLVMIEQPRGEAFYYVRGNGTKNLDRFRMRTPTSQNLGGLVRALQGVDLADVPMIILTIDPCISCTER	[NiFe] Group 4e	[NiFe] Group 4e	Evolving	Sensitive	6	[NiFe]-centre, 1 x [4Fe4S] clusters	NuoL, NuoH, NuoC, [FeS] protein	0.609388	0.140841	0	0	0	0	0.479656	0	0.459702	0.919119	0	1.62598	0	16.3054	0	0	0	0	0	0	0	0	0	0	0	0	0	0	0.754635	0	0	0	0	0	8.46979	1.78498	0	1.54886	0	0	0
WP_004329321.1	METIKLTIDNRTAEVAPGTNLVEAAASVGIKIPTLCYLNLHELGCKNDPGVCRICVVEVEGRKNLAPACKTVCTEGMVVRTHTPRVINARQTILELILSDHPNECLTCSKNGYCSLQTMAKDLGIREAKYKGETTKPMMDLSPSVVRNMEKCILCRRCETVCNQVQTVGALSVVGRGFTSVLCTAFNDPILTTNCVNCGQCVAVCPTSALSENSNIREVMQALADPGKTVVVQTAPAVRVALGQDFGLEGRSVTGKMTTALRRLGFDYVFDTDFAADLTIMEEGTELLQRLNKYLAGDRTVKIPLMTSCCPGWVSFMEKHFPELGENLSTAKSPQQMFGAIAKNYLAPKLGIDRRNFIVVSVMPCVAKKSEAARPEFGKDGDPDVNISITTRELAHMIR…	[FeFe] Group A3	[FeFe] Group A3	Bifurcating	Labile	3	[FeFe]-centre, 3 x [4Fe4S] clusters, 1 x [2Fe2S] cluster	NADH dehydrogenase, thioredoxin	63.0503	45.145	0	174.375	80.5459	41.8429	34.5352	39.446	101.134	133.272	32.1665	134.956	0	2.32935	6.77572	0	272.789	32.2583	0	0	10.8999	134.739	78.7601	3.56523	6.23065	41.9147	69.8849	21.2643	26.7895	10.3426	238.56	0.462051	3.19972	7.81971	16.9396	20.2297	0.433716	35.6239	17.2134	35.3123	18.6518
WP_005333143.1	MQSIQNNRGGKNMGSMMIDGRRVEFTDEPNVLAVIRKAGIDIPTLCYHSELSIYGACRLCTVENEWGKTFASCSEKPKDGMVIYTNTPRLIKYRKQIIELLLASHCRDCTTCIKSGECHLQDLAHRLGVHDVRFENTKEPHPIDDSSPAIVRDPNKCILCGDCVRMCDNVQGVNAIDFAYRGTEAIVSPAFNKPIAQTDCVNCGQCRVVCPTGAISIKTNIDVVWDALADKDTIVIAQIAPAVRVAAGEEFGIPKGENVMGKLVGVLHRLGFDEVYDTAYGADLTVMEESKEFMERFNAGENLPLFTSCCPAWVKFCENRYPEFVPHLSSCRSPQQMFGAVVREYYKNPENNAGKKLVSVSIMPCTAKKEEILRPESKTNGRQDIDYVLTTTELISMIK…	[FeFe] Group A3	[FeFe] Group A3	Bifurcating	Labile	3	[FeFe]-centre, 3 x [4Fe4S] clusters, 1 x [2Fe2S] cluster	NADH dehydrogenase, thioredoxin	22.3894	14.6339	15.4457	6.19999	22.6094	22.071	31.1776	25.2016	45.9702	7.35295	19.8474	29.2676	11.6742	9.31739	17.1999	17.2218	8.99305	10.1383	78.6283	25.1932	0.908327	11.7649	17.184	30.3044	19.9381	31.1674	14.6758	16.6416	9.43293	25.6102	23.2741	30.4954	23.198	5.77978	15.8809	36.2945	14.7464	27.1051	51.6402	6.5192	28.9424
WP_013613424.1	MLYDNFAMLTKRELLIRIVKLLKKDELITGLKYLPVEMRPRNKRPVRCCIHKDRYILKHKIISILGFEITDEEIDLIHLSDFARMAMANKNMKENILSVVHEACSACIQSQYAVTNLCRGCEGRPCVMNCPKAAISFIGGKASISSEDCVSCGLCQKVCPYHAIVYTPVPCEDVCPVKAISKDAEGVEHIDKEKCIYCGKCMQACPYGAIMERSKIIDIHKSISNPKKKIVAIPAPAIYGQFNATPGQVLAAIKQIGFDDVIEVALGAEITAANEAKELEEKMQEGQAFMTTSCCPAYTGWVDKHAPMLKPYVSETRSPMVYAARYAKEKYPDAEVVFIGPCLAKRHEADSVDEVDYVMSFEELGAFMVAYDIDVANCSEKELNHEVTKYGRGFAQAGG…	[FeFe] Group B	[FeFe] Group B	Evolving	Labile	1	[FeFe]-centre, 3 x [4Fe4S] clusters, 1 x [2Fe2S] cluster	None	3.76758	3.65016	0	0.774999	12.7178	1.83925	0.959312	1.09572	7.35523	6.43383	2.73757	9.75588	0	0	0	0	17.9861	2.30416	1.51208	0	0	7.30664	17.184	0	2.24303	0	2.09655	0	3.39586	0.985006	12.835	0	0	0	3.17617	0	0	2.3233	0	3.80287	0
WP_029502830.1	MANINIKINGMEVSAPAGSTILEAARLAHIEIPTLCYLKEINEIGACRICVVEVKGARSLVASCVYPINEGMEVFTNTPKVLKSRKRTLQLILSNHDRRCLSCVRSGDCELQKLCKDLGVEDESLYDGEKGIYELDESAAHMVRDNNKCILCRRCSAVCSQTQGIGVIGANERGFKTNIGSAFEMGLGETSCVSCGQCIAVCPTGALYEKDSVDEVLEAIADPEKFVFVQTAPAVRAGLGEAFGLPIGTNVEGQMIAALRRVGFDKVFDTNFSADLTIMEEATEFLDRVQNGGVLPLITSCSPGWIKYCEHYFPEMTENLSSCKSPQQMFGAIAKTYYAKKLGIDPEKMVSVSIMPCTAKKFELGRDDQSAAGVPDVDYSLTVRELARLIDKVGLNFLS…	[FeFe] Group A3	[FeFe] Group A3	Bifurcating	Labile	4	[FeFe]-centre, 3 x [4Fe4S] clusters, 1 x [2Fe2S] cluster	NADH dehydrogenase, thioredoxin, thioredoxin	6.26418	3.9891	9.26745	10.85	5.65234	11.9551	4.79656	2.19144	2.29851	9.19119	0.684393	6.50392	4.12031	0	2.60604	0.53818	8.99305	2.765	1.51208	1.57458	7.72078	9.78346	14.32	0	4.98452	6.44842	4.89194	27.7361	8.6783	2.95502	4.79173	4.15846	1.59986	1.01996	7.41107	1.78498	0.867433	2.3233	2.58201	10.8653	0.643165
WP_012543804.1	MANNAGVYYHSVTLDEEKCKGCTNCIKRCPAEAIRVRNGKARIIDQLCIDCGECIRACPNHAKVAVTDSWDLMNDFKYRIALPAPSLYGQFKNVDVDNVLTALLEIGFDDVFEVALGADIVSKLTRQALMENRLRRPVISSSCPAVVRLVQIRFPSLLDNVLDLCTPMEVAATLAKDEAVRKTGLKREEIGTFFISPCGAKVTSVRKPIGTDKTDVDGVLSLASVYSAIADKVKKVQPMPLSKASMIGIGWAKSGGEAAGTLLENYIYVDGIQNVIKVLEEVELGKMEDLDFLEAMACVGGCVGGPLTVENNFVAQQRIKKLTEKWQKDRNNNKVPAKDEEQGIYNKMELGRARWKKPLERSDAMELSSDIAEALSMMQRIDEVLATLPGLDCGSCGAP…	[FeFe] Group C	[FeFe] Group C1	Sensory	Labile	2	[FeFe]-centre, 2 x [4Fe4S] clusters, PAS domain	Histidine kinase	1.28294	0.59734	0	3.09999	0	2.75887	0.479656	2.19144	1.3791	1.83824	0.684393	1.62598	1.37344	0	1.04242	0	0	0.460833	1.51208	0	2.27082	2.97219	1.432	0	1.49536	1.07474	2.79539	5.54721	1.50927	0.985006	0.171133	0.462051	0	0	0	1.78498	0	1.54886	0.430335	2.71633	0
WP_015513457.1	MNKKFFHSVYLDESLCKGCINCIKRCPTQAIRVRNGKARITSQFCIDCGECVRTCSHHAKKIHIDSLDILNNYAYTVALPAPSLYAQFNNLDDVNILLTALIYLGFDDVYEVGAAAELVSEASRKYVDEHKDQWPFISTACPSVVRLIRVRFPNLIDHLLPILPPIEVAATLARKRAMAKTGLPADKIGIIFISPCPSKVTYVKSPLGTTRSEVDGVLAVKDVYPLLLPHMKIAEQHPMDLAISGRIGIGWGCSGGEAGGMITDSYLAADGIENVIRVLEDLEDEKFAKLQFIELNACSGGCVGGVLNVENPYVAKAKIKRLNKYLPVARTHSEDIPQKVELGWHTTVEYEPVFRIGDTMLESITKMKQIEELCNEFPGLDCGSCGAPSCRALAEDIVR…	[FeFe] Group C	[FeFe] Group C1	Sensory	Labile	2	[FeFe]-centre, 2 x [4Fe4S] clusters, PAS domain	Histidine kinase	14.9229	9.74671	7.72287	17.05	8.47851	29.8878	21.5845	14.2444	20.2269	19.3015	25.3225	17.8858	11.6742	25.6228	15.6363	10.2254	8.99305	22.12	34.7779	9.44746	9.08327	15.4802	7.16001	10.6957	9.47059	14.5089	1.3977	37.906	20.7525	15.7601	10.7814	6.00666	12.7989	0.339987	1.05872	16.0648	12.5778	17.8119	15.9224	32.0527	18.0086
WP_011393219.1	MSTVKLTIDNIPVEVEAGTTILKAAEEAGIHIPTLCYLEGINEIGACRVCVVEVEGARNLMASCVAPVAEGMVVKTNSPRVRMARRLNVELLLSNHEMECPTCIRNLNCELQSLARGLGIRQVRFKGKKSEHPVDDSTPALVREPDKCILCRRCVAVCEKVQGVMAIAPLGRGFDTVIAPAFQEKLVDIACVECGQCTLVCPVGALYEKDYTSEVWAALADPEKFVVVQTAPATRVSIGQEFGLAPGSINTGQMVAALRRLGFDRVFDTDFSADLTIMEEGSEFIERFTKDGPLPLITSCSPGWIKFMEHFYPELIPNVSTCKSPQQMFGAVAKTYYARKAGVDPARMVVVSIMPCTAKKFECQRPEMRDSGYQDVDYVLTTRELARMIREAGIDFKNL…	[FeFe] Group A3	[FeFe] Group A3	Bifurcating	Labile	3	[FeFe]-centre, 3 x [4Fe4S] clusters, 1 x [2Fe2S] cluster	NADH dehydrogenase, thioredoxin	4.75404	3.0844	0.514858	9.29998	11.3047	6.43736	4.79656	1.09572	4.59702	10.1103	3.42196	1.62598	2.74687	2.32935	5.21209	1.61454	5.99537	4.1475	1.51208	0	2.27082	3.21987	10.024	1.78261	2.24303	10.7474	2.09655	20.3398	6.03708	0.985006	1.71133	8.77897	0.799931	2.37991	3.17617	2.97496	4.77088	6.19546	1.291	7.60573	3.21582
WP_018086225.1	MENLREKEEIKAAGEMVTINIDGRDYRVPRGLSVLEAARTVNIEIPSLCYLKDINEIGACRVCVVEIEGARTLQASCVYPVREGLVVRTNTERVRRARKTAVTLLLSNHHRECTTCIRNLNCELQNVADSLGIRNIPFTGEMKDYGFFDHNPAIQRDYNKCIHCRRCLAICNKIQECYVYSPLYRGLNTVIAPAFQKDLAEVSCIMCGQCVLACPTASLTEKEHIAEVWRAIADPDKLVVVQTAPSIQVTIGELFGMPMGSFVAGKLVAALRHLGFDRVFATDVTADLTIMEEGSELMERLLHQPEKLPLLSSCCPGWVKYAEHFYPEFLPHLSSTKSPHAMCGALTKSWYARQHNIDPQRMVNVAIMPCTAKKYEAARPEMECDGLRNIDYVLTTREL…	[FeFe] Group A3	[FeFe] Group A3	Bifurcating	Labile	3	[FeFe]-centre, 3 x [4Fe4S] clusters, 1 x [2Fe2S] cluster	NADH dehydrogenase, thioredoxin	0.52318	0.125297	0.514858	0.774999	1.41309	0	0.479656	0	1.83881	0	0.684393	0	0.686718	0	1.04242	0	0	1.3825	0	0	0	1.4861	1.432	1.78261	0.747678	0.537368	0.698849	0.924536	0.377317	0	1.19793	0.462051	0	0	0	0	0	0	0.430335	1.08653	0.643165
WP_027183226.1	MPESKAKDSVATPAYLSNLTPPQKGERVEMEGVYYKIAAPKDVDPASIYFVQVDKDKCVGCGECTSHCPTGAIQEMHADGQRGIVDSAVCVNCGQCLENCPFGAISEEVSFVGELFEKLRDPNTVVVSMPAPAVRYGLGECFGMDTGTYVGGKMHAALRRLGFGLIWDNEYTADVTIMEEGTELLERVKHGKKPLPQFTSCCPGWVKFAETFYPDLNGHLSTCKSPIGMLGPLAKTYGAEQAKIDGKNIYTVSIMPCIAKKFEGLRPEMNASGYRDIDATINTRELAWMIKKAGIDFVSLPEEDPDPVLGLSTGAATIFGTSGGVMEAALRLAYEVLSGDTLTNPDIKVVRAHEGIKTADIPVPNFGTVKVAVASGLQNAAKLCDEVRAGKSPYHFIEV…	[FeFe] Group A1	[FeFe] Group A1	Evolving	Labile	2	[FeFe]-centre, 2 x [4Fe4S] clusters	Small subunit	0.357057	0.011621	0	2.325	0	0.459812	0	0	0	0	0	0	0	0	0	0	0	0.460833	0	0	1.36249	0.866889	1.432	0	0	0.537368	2.79539	1.84907	0	0	0.171133	0.924102	0	0	0	0	0	0	0	0.543267	0
WP_021739983.1	MVNLTINNKKIQVPEGTTILAAAAQAGIKIPTLCYLKEINEIGACRVCVVEVEGKETLVASCNTAVEEGMVVYTNSYKAQHARRMNVQLILSEHDAHCASCLRSGNCTLQSVANDLNIGDVPFGEKYEQNEWSQDFPLIRDASKCIKCMRCVQICDKVQELKIWDVINTGKRTSVGVSGRKQITESDCAVCGQCITHCPVGALHERDDIDKLMDAVHDPEKIVVVQIAPAVRSAWGEGIGLSREMATEKRMAAAVRALGVDYVFDTNFSADLTIMEEGNEFLERMTHADEYSWPMFTSCCPGWVRFVKSQYPDMVKNLSTAKSPQQMFGAVAKSYYAQILDVDPSRIFSVSIMPCVAKKHECAIPVMNDAGAGQDVDISLTTRELDRVLKAELISPAFL…	[FeFe] Group A2	[FeFe] Group A2	Evolving	Labile	2	[FeFe]-centre, 3 x [4Fe4S] clusters, 1 x [2Fe2S] cluster	NADH-dependent glutamate synthase	18.3332	12.1546	15.9606	27.8999	8.47851	20.2317	16.788	12.0529	28.0418	11.0294	21.2162	16.2598	14.4211	16.3054	8.33934	15.6072	14.9884	16.1292	24.1933	12.5966	34.5164	13.6225	18.616	39.2175	24.6734	13.9716	13.2781	7.39628	19.2432	48.7578	27.5524	25.4128	9.59917	23.7991	19.057	16.0648	22.987	3.09773	12.91	10.3221	20.5813
WP_006521135.1	MPHYFHSVMLDRDKCKGCTNCIKHCPTEAIRVREGQAIIIEERCIDCGECIRICPNRAKLAITDPLEKLADYQYNIALPAPSLYAQFGPDVLPGNILSALLKIGFDEVYEVAVGAVAVSNHLRRYIEHRPRPQPVISSACPAVVRLMQVRFPGLLEHIAPIETPMEVSARLAREKARQEHGLADKAIGIFFITPCPAKVTAVKQPFGKRSYVDGAFSMSDIYGAILQRLSDAADDSRNSLSPALGVGWGKTGGENHAIKEHALLAVDGIHNVINVLEEIERGELADIDYVEAQACTGGCIGGPLTPQNLFVARVRMEKLLKKLADCRQPLPDFPSDPDYYRLPGPIPPRPTLQLSDDINQAITMLEEVEHITAQLPGLDCGSCGSPNCRALAEDIVRGY…	[FeFe] Group C	[FeFe] Group C1	Sensory	Labile	2	[FeFe]-centre, 2 x [4Fe4S] clusters, PAS domain	Histidine kinase	0.572899	0.132567	0	0	0	1.83925	0	1.09572	1.83881	0.919119	0	0	0.686718	0	0.521209	0	0	0	0	6.29831	0	1.98146	2.864	0	2.24303	0	0	1.84907	0.377317	0.492503	0	0	0	0	0	0	1.30115	0	0	1.6298	0
WP_020073385.1	MKYDNDAKQLKYRVLSSVARLSYDNQLSEHLGDIPYEIIPGPQPAFRCCIYREREIIRERVSAACGEDLPRQGDKAVMGVLPAACEGCPINRFNVTDNCQKCLAKKCVAACPFGAVSVTGRGAYIDPAKCKECGRCAAACPYNAISDTMRPCLRSCPVNAITMDENRLAAIDYSRCISCGACMAGCPFGAITDRSSLVSVIQEIQSGKRVYAVFAPAIEGHFGTANVGQLKEGLRRLGFADAVEVSLGADATAYHEAQELKEVVEEGKKMTTSCCPAFVDMIEKHFPKLEPNISHTASPMTMTVRYLKEKEPDIKVVFFGPCVAKKLEIQKAKDTADFVMTFEELAAMFSAKEIEVETIEVENAQDGSLKGKNFAVSGGVTAAVEAALAEDGFDKAVSC…	[FeFe] Group B	[FeFe] Group B	Evolving	Labile	1	[FeFe]-centre, 3 x [4Fe4S] clusters, 1 x [2Fe2S] cluster	None	1.66561	0.833969	3.08915	1.55	2.82617	3.67849	0	0	0.919403	0.919119	2.05318	3.25196	2.74687	2.32935	1.04242	0	0	2.30416	1.51208	0	0	1.85762	0	0	1.74458	3.22421	0.698849	4.62268	0	3.44752	0.171133	2.7723	0	1.35995	4.2349	0.594992	0	0	3.01234	3.80287	0
WP_018338305.1	MQLRPIYTEPDNCQDCYKCIRECPVKAIRMEDNKASIIEDRCIYCGHCTQVCPTGAKKIRDGLTRAKLTLTQNPKVLLSLAPSYVSEFEGIHSSVLIAAIKKLGFTDVSETALGAEIVSDRTEKFLEEADNGVYISSACPVVVEYIRKYSPEHVHNITPIISPMLAHAKILKQLYGEDIKIVFAGPCICKKLEADTFNNLVDVVITFKDLKKWFEQAEINLHQIAPGQPDAHFIPYRSGMGAYYPIEGGMLKGLHEPKKQVHNMAFSELSTVKDVLKSLDTRRENDSIFLELLACKGGCINGPAKLSHISPALKRYEIIHQSELGNPKDDFKYIDLQILFCKDPHIQDHVYTEEEIKQAMAVVGKTGPEDELNCSGCGYDTCRDFAIAMLEGRAEENMC…	[FeFe] Group C	[FeFe] Group C3	Sensory	Labile	3	[FeFe]-centre, 2 x [4Fe4S] clusters, PAS domain	Phosphatase, thioredoxin	0.624229	0.157547	0	0	2.82617	0	0.959312	0	2.75821	0.919119	0	1.62598	0	0	0.521209	0	2.99768	0	0	0	0	0.743048	0	0	1.49536	0	0	0	0	0.492503	0.171133	0	0	0	6.35234	0	0	0	0.430335	0.543267	0
WP_025863484.1	MKMVTLTIDNKTVEVPKGTTVLEAAAKVGVEIPTLCHMKLDNLEIENKPGGCRVCLVEIQGRKNLAPSCVTEATDGMVIKSSSIRVINTRRTIVELILSDHPAECLTCAKSGNCDLQSLAIKMGIRELHFSGEKSVHREDKSPAIIRDMDKCIMCRRCETMCNEVQTVGVLSAINRGFNSVVSPAFEQDLQDSACTYCGQCVAVCPVGALTERDQTGAVIRALSNPDKTVVVQTAPAVRAALGEEFGQEAGTLVTGKMAAALRRLGFNYVFDTDFAADLTIMEEGTELLDRLTRHLNGDSTVKLPILTSCCPAWVKFIEHNFPSLLDVPSTAKSPQQMFGAVAKNYFAEKLNVDRKKLVVVSIMPCVAKKYERGRDEFAVDGNSDVDFVLTTRELSHLI…	[FeFe] Group A3	[FeFe] Group A3	Bifurcating	Labile	3	[FeFe]-centre, 3 x [4Fe4S] clusters, 1 x [2Fe2S] cluster	NADH dehydrogenase, thioredoxin	0.485648	0.101717	0	0	1.41309	1.37943	0	0	0	0	0.684393	0	0.686718	0	1.04242	0.53818	0	0.460833	0	0	0	0.247683	1.432	0	0	2.68684	0	0	0	0.492503	0.171133	0	0	0	0	0.594992	0.867433	0.774432	0	0.543267	0
WP_012003383.1	MASVLVEINGKQHQVPSGATILEACNLAGVYIPTLCNHPRLEPTGACRVCVIEVEGARNLQPACATKVQDGMKIKTKTDRVEKAVKFNLALLLSRHPKDCMTCEVNGRCEFQDLIYRYDIQDLFPSEEKTSTVYDDSSPSIIRDLEKCVVCGRCVRACSELQGMDIYSMVDRGFETLPQTAFEMPVYETDCIACGQCSAFCPVGAITENSNVRKVLEELERHDKVLVVQTAPATRVALGEEFGLEPGSISTGKMVAALRKLGFDYVFDTNFAADLTIMEEGSEFLERLKNGGPFPMFTSCCPAWVNMAEKLYPQFLKNLSSAKSPHQMLGPLVKTYFAKKKGIDPENILVVSIMPCTAKKDDIIRPQHMVNGMPGVDIVLTTRELGKLIKMKKIPYASL…	[FeFe] Group A1	[FeFe] Group A1	Evolving	Labile	1	[FeFe]-centre, 3 x [4Fe4S] clusters, 1 x [2Fe2S] cluster	None	0.693392	0.210266	0	2.325	1.41309	0.459812	0.479656	0	0.459702	0.919119	0	1.62598	0.686718	2.32935	0	0	0	0.460833	0	0	0	1.23841	7.16001	1.78261	0.996904	2.68684	0	0	1.13195	0	1.19793	0.924102	0	0.339987	0	0.594992	0	0	0	1.08653	0
WP_013610546.1	MGNETFYHALKINSEVCTGCTHCMNVCPTAAIRIKYGKATINEAACTDCGMCLKTCPRQAIYVEQDDFNQIFKFSYRIILLPSVFIGQFPEDISEEQIFSELHNLGFHYVMEVDKSTGLLMEETKHYLQQHPRQRPFISSFCPAVVRLIQVRFPSLIGHIVRLKQAMDIAAIYVRKKYIDKGIPEKEIGVFYVTQCAAKIAAIKCPVGEESSPVDGVINMDFIYNKILLSINRHKSQVLPRVPEQYHLTPQSIQWTLSGGEASNYPGRCLAIDEIHNVIDILEKLENDELTDIDFLELRACDHSCAGGALAINNRFLTIERLQKRMENYIKYNYISINKMPRYKDFLVKQMQLSGEIPPRSIEKLDEDLSVAFQKMEKITRIMKVLPQIDCGACGTPSC…	[FeFe] Group C	[FeFe] Group C1	Sensory	Labile	2	[FeFe]-centre, 2 x [4Fe4S] clusters, PAS domain	Histidine kinase	3.29312	3.3001	0	0	7.06543	2.29906	0	1.09572	4.59702	5.51471	1.36879	4.87794	0.686718	2.32935	1.04242	0	11.9907	2.30416	1.51208	0	0	10.6504	11.456	0	0	0.537368	2.79539	0.924536	2.64122	0.492503	11.1237	0.924102	0	0	0	0	0.433716	0	0	3.80287	1.28633
WP_027096606.1	MINLTINGLPCQATKGSTILEAAIENDFHIPTLCHLKDVHKFGTCRICVVEQVGAKNLQASCMVEAQEGMEIYTHSDRVRRARKTLYQLMLSDHNKNCLSCIRNQDCDLQAMGRELGVLSDPYAGANNPGKPDFSESILRDSTKCILCRRCVTVCNDIQQVCVLNAQSRGFLTTVSPAANMRLGESNCTYCGQCVSVCPVGALAETSHKERVWQALGDPEKFVVVQTAPAVRVGIGECFGLEPGTSLTGKMVTALQVMGFDAVFDTNWGADLTIMEEGTEFLNRLKDTLTGKQATLPMMTSCSPGWVKYIENHFPDHLDHLSTCKSPHTMLGAVVKHYYAKKIGKNPEDMYVVSVMPCTAKKTEIARREMCNDGVPNVDAVLTTRELGDMIRSTGTNFL…	[FeFe] Group A3	[FeFe] Group A3	Bifurcating	Labile	3	[FeFe]-centre, 3 x [4Fe4S] clusters, 1 x [2Fe2S] cluster	NADH dehydrogenase, thioredoxin	4.67759	3.10994	3.60401	1.55	5.65234	5.97755	4.79656	7.67005	7.81493	1.83824	2.73757	8.1299	0.686718	4.6587	0.521209	0	0	5.06916	0	0	0	3.21987	0	1.78261	1.99381	9.67263	2.09655	19.4152	6.79171	3.44752	1.88247	15.2477	10.3991	0	3.17617	1.78498	7.8069	12.3909	4.30335	14.1249	3.85899
WP_006003971.1	MAKATIAIDPVTRIEGHLKAQVVVENGKVVDAHLTGGMFRGFEQILKGRDPRDSTQIVQRICGVCPTSHAMASALAQEDAFNIKVTGNGRITRNLILGANYLQSHILHFYHLAALDFVAGPDTAPFVPRFAQPDLRLPPEANKVGVDQYLEALEVRRIAHEMVALFGGRMPHVQGIVPGGATEMPTKEALLEYAARFKKVRQFIVEKYLPITYIVGSVYKDLFEQGQGVHGCSCFGVFPMTDDGKTHLLKAGVFLNGRDVEFDPKKITEDLKYAWYDDATTGKGADGAETNPNLDKKDAYSFVKAPRYDGEVIEVGPAARMWVANAPLSEVGVKMLKEKFGIEARTIRDLGWDKVFSIMGRHVARAEEALLIANAVEGWLKEVKPDGETFTPFEIPQSA…	[NiFe] Group 1a	[NiFe] Group 1a	Anaerobic Uptake	Sensitive	3	[NiFe]-centre, 3 x [4Fe4S] clusters	Cytochrome	1.06989	0.447455	0	0	21.1963	0	0	0	0	0	0	0	0	0	0	0	0	0	0	0	0	23.1583	0	0	0	0	0	0	0.754635	1.97001	0	0	0	0	0	0	0	0	0	0	0
WP_027397032.1	MPEAILMAAEKMSAGGKHPLTAMFGRDETANGVGYVIYCYFEIPENKTVDGFKVVFNPNGSLEYDSITHIIPAAAWYEREIKDMFGLVPKGHPDLRSLVLHETFPEDFYPLRKNVKVNAKVRGERQFKVRTAKGEGLFEVPVGPIHAGIIEPGHFRFSQAGEAMLQLDAKLFYTHRGIEKAVEGKTPYEALPIVERICGACSVSNTWSFCQAVEKAVNVKVPRRAEIIRTLLMELERITNHVGDIGNIPAGVGFNPAISLGGRLKEKLMRLCEAVAGNRFLRGMIIPGGVSMDITPELCDRIHQVMDEVADGVEDMATMFREQENFQNRIQTTGIVRNQTAMDLAMVGVGARASGYSHDSRCDFSYGVYDELDFKPYTKTMGDVAARLLVRIGELSASF…	[NiFe] Group 4f	[NiFe] Group 4f	Evolving	Sensitive	6	[NiFe]-centre, 1 x [4Fe4S] clusters	NuoL, NuoH, two antiporter subunits	0.534093	0.0551458	0	0	0	0	2.39828	0	2.75821	0	1.36879	0	0	0	0	0	0	0	0	15.7458	0	4.08676	1.432	0	0	0	0	0	0.754635	0	0	0	0	0	0	0	0	0	0	0	0
WP_013275360.1	MKTLKINGREVAFSDEKNLLEVIRKAGIELPTFCYHSELSTYGACRMCLVEDKRGNLIAACSTPPREGMEIKTHTKRLLKQRRMTLELILAEHDRDCTTCGKNGDCKLRKLSHDLGVEEIRFGTKENYLPIDDSSEAIVRNPNKCILCGDCVRMCEEVQGIGVIGFAHRGAKAVVTPAFNKNLCEVECVDCGQCSAVCPTGAIVVKSHIDKVWDALNDDNKVVIAQIAPAVRVAFGEAFGLRPGESTEYLIVSALKAMGFDMVFDTCFAADLTVIEEGHEFLERLEKGENLPLFTSCCPAWVKFVEFNYPSFLNNLSSCRSPHQMFGSFTKNYYAKELGVSRENVYVVSIMPCTAKKAEAAREELGVDGNPDVDAVLTTRELIRMVREAGIVFKDLKEE…	[FeFe] Group A3	[FeFe] Group A3	Bifurcating	Labile	3	[FeFe]-centre, 3 x [4Fe4S] clusters, 1 x [2Fe2S] cluster	NADH dehydrogenase, thioredoxin	0.826386	0.320904	0.514858	0.774999	5.65234	0.459812	1.43897	0	1.3791	2.75736	0.684393	0	0	0	2.08484	0.53818	0	0.460833	1.51208	0	0	0.99073	4.29601	0	0.996904	3.76158	1.3977	0	1.50927	0.492503	0	0.462051	0	0.339987	1.05872	1.78498	0.433716	0.774432	1.72134	0.543267	0.643165
WP_012798463.1	MGKATVIPFGPQHPVLPEPLHLDLVVQDEKVIEVIPQIGFIHRGLEKLVEKKDIHQFIYVAERICGICSFGHSLGYAETVEKLMGVEVPRRAEYLRVILHELSRIHSHLLWLGLAADAFGFEALFMHSWRIRERVLDIFEATTGGRVILSAVQIGGVIRDIDDEELKQISATLDGMRSEYAELMATFLNDTSVRSRLVNVGRLTQTQAEDLCMVGPFARASNVKFDCRMLGNGAYGELENFQPILDDEGDCYARVRVRCKEVIQSIDIIQELIAKIPHDGIGERSKLTPPDGAQAANVLEQPRGECYYYARGNGSKNLERMRMRTPTSQNLAGLVAACEGAELADVPNILLTIDPCISCTER	[NiFe] Group 4e	[NiFe] Group 4e	Evolving	Sensitive	6	[NiFe]-centre, 1 x [4Fe4S] clusters	NuoL, NuoH, NuoC, [FeS] protein	0.436527	0.0921731	0	0	0	0	0	0	1.83881	0	0	0	0	0	0	0	0	0	0	0	0	0.247683	1.432	0	0	5.37368	0	0	0	0	0	0	0	0	0	0	0	0	4.73368	0	3.85899
WP_005210787.1	MGEENEGSGKMFKFETQLKKLKHEVLTEVARLARVDGISLESIEKVPYEVIKGDIAQYRCCVYKERAIVLERAKLAAGYLANGDNADTDLIDIRPDEQIIYVIEAACDRCPINKFNVTDSCRNCLAHRCQEACNFGAITIVNGRAYINQELCKECGGCKRACPYDAISEVMRPCKRACPTGALDIREDDRRAMIKEELCVNCGSCMRACPFGAISDKSLIVPVAKRLGRNRKMYAVVAPAITGQFGPTMNYGKVRNAIKSLGFEDMIEAALGADAVTVHEANEFVERMERGDKYMTNSCCPGFLSFIEKTNQSEATKISGTVSPMVATARYIKKKDPEAKVVFIGPCTAKKGEAVRLGIADAVDYVLTFEELLALFEAFDVNPFECEEENVNDASVFGR…	[FeFe] Group B	[FeFe] Group B	Evolving	Labile	1	[FeFe]-centre, 3 x [4Fe4S] clusters, 1 x [2Fe2S] cluster	None	2.28075	1.23697	1.02972	0.774999	0	0	0	30.6802	0.919403	20.2206	2.05318	0	0.686718	0	8.86055	0	0	0.921666	0	0	1.81665	0.495365	2.864	0	1.74458	0.537368	1.3977	0	0.377317	0	0.171133	0.924102	11.999	3.05989	0	0	0.867433	3.87216	0.86067	8.69227	5.14532
WP_004823125.1	MKETYQSIVDIRRKVFAEVARIAYYDVDISELEDSSYRIVPGEVAKYREDIFRERAVADERLRLAMGMDAREISVYKKLTDGFDKVDIDTNAYEKPLINVIKFACEACPTKAHVVTDNCRKCMAHPCTNVCPVNAVSVGRSRAHIDKEKCINCGRCKEACPYNAIVMYERPCAAVCGVDCISSDEYGRAEINHDNCVACGRCIASCPFGAIADKTQIYQLIKAIKSGKRIYAAVAPSFVGQFGANSSPAQIVEGIRQLGFEDVVEVSLGADVTTMNEAKEYIHRVPNDIPFMGTSCCFSWALMVKNKFPELSGQISDSGSPMRYTAEYIHEKDPEGIICFIGPCTSKKLEALDTKVKSHVDFVITFEELMGMFVAKGIEPSEIVIENDVKDASALGRGY…	[FeFe] Group B	[FeFe] Group B	Evolving	Labile	1	[FeFe]-centre, 2 x [4Fe4S] clusters	None	0.653864	0.385304	0	0.774999	0	0.919623	0.479656	4.38288	0.459702	1.83824	1.36879	0	2.74687	0	0	0	0	0	0	0	0.454164	0.743048	0	1.78261	0.249226	0.537368	0.698849	0	0.377317	0	0	0.462051	0	0	0	0	0.867433	2.3233	1.72134	0.543267	0
WP_014559402.1	MNHAIVTTITDRCKRCYSCIRECPAAAIRVVDGQAKVIEERCISCGHCVKVCSQDAKQIFSEIDIVFDLLRTNKVVAIVAPSFAASFPENYKRVPTALRKLGFTQVVETAFGADLIANHYSEILKSEADKTIISSACPAVVSFIQKYYVELVPNLAKVVSPMIALGRYLKQELGDEIKIVFIGPCVAKKHEAVDDEVYGVIDAVLTFHELKEMFDEKQIEINSLEESEFDPPHAMMGKAYPLAGGLLKTTDINDDVLEKDIIVVEGKKKVLEIIEEIAHNNINAKFTDILFCEGCISGPAIDTTLNYYSRREKVIDYIQEKINNVDRRVWKSNLYNARKLNLIRNFKADNQRRPMPDEEKIREILAQTKKFTPKDELNCGACGYETCREYAIAIAKGLA…	[FeFe] Group C	[FeFe] Group C3	Sensory	Labile	1	[FeFe]-centre, 2 x [4Fe4S] clusters, PAS domain	Fusion with histidine kinase	1.60648	1.50792	0	1.55	0	1.37943	4.79656	0	0.459702	0.919119	1.36879	0	1.37344	0	1.04242	0.53818	2.99768	0.460833	3.02417	1.57458	0.908327	0.866889	0	0	0	1.07474	0.698849	1.84907	2.64122	0.492503	0.171133	0.462051	1.59986	5.4398	1.05872	4.16495	6.93946	0.774432	4.30335	2.71633	0.643165
WP_021644837.1	MAFTNNIMIVRHKLLADLVRLWKDEQLIEKIDRLPLELTPKKSKHMGRCCVHKERAVWKYKSFPLMGFDMSDEHDELTPLSEYARQALKREEITKENILCVIDEACSSCIQINYEITNLCRGCVARSCYMNCPKGAVHFKKNGQATIDHDACISCGICHKSCPYHAIVYIPVPCEEACPVKAISKDEEGVEHIDESKCIYCGKCINACPFGAIFEISQTFDVLQGIRKGEKMVAIIAPSILGQFNTSIEQVYGAFKQIGFADVIEVAEGAMMTISNEAHELVEKLEEGQAFMTTSCCPSYIELVEKHVSGIRPYVSSTGSPMYYAARIAKEKHPDAKIVFVGPCVAKRKEVRRDEAVDFILTFEEIGSIFDGLGIELKEAQPFSVLHTSVREAHGFAQA…	[FeFe] Group B	[FeFe] Group B	Evolving	Labile	1	[FeFe]-centre, 3 x [4Fe4S] clusters, 1 x [2Fe2S] cluster	None	2.88291	1.85901	0	5.42499	5.65234	2.29906	0.959312	0	5.97612	6.43383	2.05318	8.1299	0	0	0	0	11.9907	1.84333	0	0	0.908327	6.06822	5.72801	0	0	1.07474	3.49424	0.924536	0.377317	1.97001	7.70099	0	0	0	0	1.18998	0	1.54886	0.86067	3.2596	0
WP_023920581.1	MRGVETRIQEIRHKIFTEVARMAYHTEWSVKDRMEALPYKIIPGEKGNFRNDVFLERAIVGERLRLAMGLPYRSAAEHSPISDGIEAADKDETYYTPPLINVIKFACNACPEKRVHVTDGCQGCLAHPCMEVCPKDAVSLDRTTGKSVIDQEKCIKCGRCASVCSYNAIIVQERPCAKACGMDAISSDENGKANIDYDKCVSCGQCLVNCPFGAIADKSQIFQTIRAIQSGEKVYAAVAPAFVGQFGSKVTPGKLRAAMKALGFADVFEVAIGADLCAKQEAEDFLKEVPDELPFMATSCCPAWSVMAKKLFPEHAKCISMALTPMTLTARLIKQHNPDARVVFIGPCAAKKLEAMRRSVRSEVDFVLTFEEMTGIFSAKHVDLENIEEDPAGVSDAST…	[FeFe] Group B	[FeFe] Group B	Evolving	Labile	1	[FeFe]-centre, 2 x [4Fe4S] clusters	None	2.31356	2.87199	1.02972	0.774999	0	3.21868	4.79656	0	0.459702	0.919119	0	0	2.06015	9.31739	0	2.6909	0	2.765	4.53625	1.57458	6.35829	0.619207	8.59201	0	0.747678	0	0	0	1.13195	0.492503	1.71133	0.462051	0	4.41984	0	0	0.433716	0	2.15167	0.543267	1.28633
WP_005351469.1	MLMNRTTPFMVPVDDANPAIIKNEALCSECGHCFAVCEEEIGVAAKYLLNQREAYQCIGCGQCSAVCPEKAITGRPHYKIVKELIQDPEKIVVFSTSPSVRVGFADGFGKEPGTFAQDEMVGALRALGADYVFDVTFSADLTIMEEGSELLSRILKGTGPLPQFTSCCPAWVKYMENFHPDKTKYLSSAKSPIGMQGAVIKTYFAHKKHIDPEKIISVAVTPCTAKKAEIAREELCDAGKLLNIEEMRDNDYVITTKELVQWCKEEGMDLGKITPSKYDSVLGEGTGAGMIFGNTGGVMEAALRTVYRVLEGKEAPADFYQLRPVRGLNNRKEAEVTIAGKNLKVCILYGTAAAEEFLAEDMSGYHFVEVMTCPGGCISGAGQPDCGSVPVSDAVRKKR…	[FeFe] Group A1	[FeFe] Group A1	Evolving	Labile	1	[FeFe]-centre, 2 x [4Fe4S] clusters	None	62.766	46.6023	89.0705	55.0249	69.2412	60.6951	120.394	49.3074	97.4567	45.0368	27.3757	87.8029	412.717	65.2217	33.8786	32.829	14.9884	68.6641	72.58	72.4305	100.824	41.7345	8.59201	124.783	25.9195	87.5911	55.209	88.7554	52.4471	68.4579	7.87213	38.3502	59.9948	1.01996	62.4647	71.9941	67.6598	59.6313	86.067	118.432	64.3165
WP_012421152.1	MSNYTSADVPESSRVVIDPVTRIEGHLRVEMEAGDGVIKNAWTSTTQYRGIEVIACKRDPRDVWAFVERICGVCTGTHAIAALAAVEDALQYPVPVQARLMRDLVSGALGIQDHVIHFYQLQAMDWVDVMSALKADPAETAAIAKSLSDWPLSSAAYFAGVQKKLKDSIAYGQYSIFTNGYWGHPAYKLPPEVNLLGVAHYLQALVWQRDMIKIHTILGGKNPHPNFLVGGMACAINMNNDQAINQFSLSYLKQLVQTCHDFIHKVYYPDIVAIAGFYKDYAHIGASNPNFFCTGAPSEINTGAPAGKGMIKPGVLLNGDYRNVLPFDQDKIREFVTSSWYRYTEGRDAGLAPYDGETNADYNGPRPPYKWLSDHPQYTWVKAPRYDGHAMAVGPNARM…	[NiFe] Group 1f	[NiFe] Group 1f	Anaerobic Uptake	Unknown	3	[NiFe]-centre, 2 x [4Fe4S] clusters, 1 x [3Fe4S] cluster	Cytochrome b	31.7713	46.6883	0	0	0	0	36.9335	0	134.693	70.7721	0	113.819	0	0	0	0	0	66.3599	251.006	0	0	7.92584	45.8241	0	0	54.8116	0	0	60.3708	0.492503	0.342266	0	2.39979	0	119.636	0	0	42.5938	2.15167	106.48	0.643165
WP_005210163.1	MSYILPLGPYHPALEEPVHVKLLTEGEIIKDSEVFIGYNHRGIEKLTESRNYIQTITLVERVCGICSHSHAMTYCLAVENIAGMEVPKRGSYIRVIISELERLHSHYLWLGLAAHIIAFDSLFMMCFASREKIMDMLEVISGNRVNYAMNIVGGARRDITKEQKDTVLKMIEELRREYKNIYNVYAKDSSIAARTKGVGILTTDDALNYGACGPHGRASGVNFDVRKSMPYNCYEDFDFNVALANDGDVFSRAVIRLIEIEESCKIIEQALKNMPEGPINLGNKIPKVPAGEYIAVTEAPRGEVTYYVVSNGGQTNGRVNIHVPTFKNAMTVPVMLKNNTIADAGLIVASIDPCFSCLDR	[NiFe] Group 4d	[NiFe] Group 4g	Evolving	Sensitive	6	[NiFe]-centre, 1 x [4Fe4S] clusters	NuoL, NuoH, NuoC, [FeS] protein	2.42777	1.49361	0.514858	1.55	2.82617	2.75887	2.39828	25.2016	0	15.625	2.73757	1.62598	4.80702	2.32935	3.12725	0	0	0.460833	0	3.14915	0	0.866889	1.432	0	0.747678	1.61211	0	3.69814	1.50927	0	0	2.7723	15.1987	1.69994	0	0	0	4.64659	0.430335	15.2115	1.28633
WP_028972813.1	MINVKINGTPVQVESGTSILNAAKAAGVKIPTLCAHPDLPPNASCGICVVKQEGSPKMVRACAAACTEGVNYITHDPEIVEVRKSVVELILANHPNDCLTCGRSGNCELQKISADFGIREIPFSRGTKKLPRDTSTPSIVLNPEKCIGCGRCVTVCQQLQDVWALEFLDRGDETKMAPAAGVLLNDSPCIKCGQCSAHCPVGAIFERDQTQDLWDAIRDPAKHVAVQVAPAVRVAIGEAFGLEPGVISTGKLYAALRRLGVDAVFDTNFAADLTIMEEGTEFVERFTKGGILPQITSCCPSWVDYMEKYYSDMIPNFSTAKSPMMMQGAMTKTYYAEVGKLDPANIYSVAIMPCTSKKYEIDRDDAMRSSGYADMDLSITTRELSRMIKQAGIDFNSLP…	[FeFe] Group A3	[FeFe] Group A3	Bifurcating	Labile	4	[FeFe]-centre, 3 x [4Fe4S] clusters, 1 x [2Fe2S] cluster	NADH dehydrogenase, thioredoxin, thioredoxin	0.780553	0.244388	0.514858	0	0	0	0	2.19144	0.919403	1.83824	0.684393	0	0.686718	2.32935	0.521209	0	0	0	0	0	0.454164	0.371524	4.29601	17.8261	0.747678	0	0	0	0	0	0.171133	0	0.799931	0	0	0	0	0.774432	0	1.6298	0
WP_021803667.1	MKKIYEDLFKELVKSYYDGNFNSTLENIMNSPNFDKLEAMSVISSLCGVDVKADENFIYNLKKAITNYKVREKIIEKVSSCSRDCTSEAGEKTKCQTACPFDAILDDPIKGTTYIDTDLCTDCGICVEACDSGNFIDRIEFIPIIDLLKNNKKVIAAVAPAISGQWGSDVTMDQYRSAFIKMGFTDMIEVAFTADMLTIKEAVEFNHHVNKDGDIMITSCCCPMWVGMLKKVYHDLVKDVSPSVSPMIAAGRVLKELNPDVKVVFIGPCIAKKAEARDKDISDAIDYVLTFEELKGIFEVLDIIPSELQGIPSIEYASRGGRLYARTGGVSIAVSEAVEELFPQKYIKLKTAQANGVKECKEILEKAKAGKLDANFIEGMGCIGGCVGGPKALIPKEHG…	[FeFe] Group B	[FeFe] Group B	Evolving	Labile	1	[FeFe]-centre, 2 x [4Fe4S] clusters	None	0.806189	0.407853	0.514858	0.774999	4.23926	0	0	2.19144	0.459702	5.51471	0	1.62598	2.74687	0	1.04242	0	2.99768	1.84333	1.51208	0	0	0	0	0	1.99381	0.537368	0.698849	2.77361	0	0	0.5134	0	0	0	0	0	0	0	0	0.543267	0.643165
WP_029502583.1	MLQTDNDIGTIKHEVLFEVAKLAFHKELAEKEDVLPFEMIPGPQANFRCCIYKEREIIRQRIRLAQGKSPSLSQDNSNIVQVISSACEECPITRFLVTDNCQKCMGKRCQKACNFQAISMSHDRAHIDPAKCKECGKCAQACPYNAIADLKRPCKKSCPVDAISMDENNIVVIDEEKCINCGQCIKNCPFGAISDRSFMVDVINLLNSEKEVYAMIAPAIEGQFGATASTGVITEALKQLGFTGVYEVALGADLVAASEAEEWAEAYKEGKKKTTSCCPAFVKMIKKHYPSLVDHISSTISPMQATAKYVKAIHKDAITVFIGPCIAKKGEVLDHIAEGGTDYALTFDELYAMLRAKEINLATIGENIQHGSIYAKNFAVAGGVTASVVEALKEKGIDA…	[FeFe] Group B	[FeFe] Group B	Evolving	Labile	1	[FeFe]-centre, 3 x [4Fe4S] clusters, 1 x [2Fe2S] cluster	None	2.78846	1.96774	1.02972	0.774999	4.23926	1.37943	3.35759	3.28716	5.05672	0.919119	0	1.62598	6.86718	9.31739	5.21209	0.53818	0	3.22583	3.02417	0	1.81665	8.42121	10.024	0	0.249226	3.22421	2.09655	3.69814	2.2639	0	3.5938	2.7723	3.19972	0.679975	3.17617	2.97496	0	0.774432	1.291	2.71633	2.57266
WP_013379183.1	MTMSDVTFKINNMEITVPEGITVLEAARRHNIDIPTLCNLKDVNEIGACRMCMVEVAGAKALQAACVYPVAPGIEVFTNTPRARKARRVNLELILSNHHRECTTCIRSENCELQSLAKDLGISDIPFEGEKSGHHIDDLSPSIVRDESKCVLCKRCLAICNKVQKIGVLGAVGRGFTSQVQPVFNKSIAEVGCINCGQCIVNCPVGALKEKSDINRVWDALGDPTKTVVVQSAPAVRAALGEEFNLPMGTNVTGKLAAALRRLNFDGVFDTDFGADVTIMEEGTELINRVKNGGVLPMITSCSPGWIKMIETYYPEMIPHLSSCKSPQNMTGALLKSHYAEMNGIDPKDLVVVSVMPCTAKKYEVQRDELSVDGNQDVDISITTRELARMIKEARLDFP…	[FeFe] Group A3	[FeFe] Group A3	Bifurcating	Labile	3	[FeFe]-centre, 3 x [4Fe4S] clusters, 1 x [2Fe2S] cluster	NADH dehydrogenase, thioredoxin	0.790728	0.66712	0	1.55	0	0.919623	0.479656	0	1.3791	3.67647	2.05318	0	0.686718	0	0	0	0	0.921666	6.04833	0	0	0.743048	1.432	0	0.249226	1.07474	0	0	0.377317	0.492503	0	0.462051	0	0	1.05872	0	0	0.774432	0	2.71633	0
WP_022094311.1	MVEPNKTTVSDNTENGAYNMVKLTIDNCEVVVPEHTTILDAAKSVGIQIPTLCYLRDLNEIGGCRVCVVEVEGCDQLVAACNNYVLDGMVVHTNSPKAREARRTNVQLLLSQHDSQCTSCVRSGNCNLQTIANDLGIFYLPYQRHLAGEGWDFDFPIIRDNDKCIKCMRCIKVCESVQGLGIWDLTNRATHTAVGTRGRAPIDKTDCVACGQCITHCPTGALRERDDTETVFDALADPGKIVLVQIAPAVRSAWGEELGIPREEATVERLACALRRVGFEYVFDTDFSADLTIMEEGSELLERLGAAAKGEGDSRGWPMFTSCCPGWVRFVKARYPEFVDSLSTSKSPQQMFGAIAKTYYAKVLGVEPERLFVVSVMPCTAKKAECALPSMVGEGGAPD…	[FeFe] Group A2	[FeFe] Group A2	Evolving	Labile	2	[FeFe]-centre, 3 x [4Fe4S] clusters, 1 x [2Fe2S] cluster	NADH-dependent glutamate synthase	31.3082	26.3222	2.05943	0	105.981	66.2129	20.1455	21.9144	46.8896	13.7868	36.9572	55.2833	0	0	10.9454	0.53818	2.99768	1.84333	3.02417	18.8949	0.454164	20.8053	4.29601	30.3044	10.2183	37.0784	0.698849	0.924536	33.9586	36.9377	0.171133	1.38615	37.5967	1.01996	46.5839	47.5994	42.9379	12.3909	94.2433	42.3748	64.3165
WP_028241974.1	MGKRSIVPYGPQHPVLPEPIHLDLVLEDEKVLAAIPSIGFIHRGLESLTSKKDFNEMVYVAERICGICSFMHGMGYCMAVEDIMNVEVPRRADYLRTIWAEMSRLHSHLLWLGLLADGFGFESLFMHSWRLRENILDMFEASTGGRVIFSVNTIGGVLKDMPNDMLKEFVKKLDDMEKEIRETTSIFLNDYTVKSRLVGVGILTGEDAIRRGAVGPMMRASGINVDMRKNGYAAYNDIDFDVITSNNCDSYARCEVRIGEIFQSIDIIRQCVAKIPDTEINTKVTGMPNGESIIRVEQPRGEAFYHVRANGTKFLDRFRVRTPTFANIPALTQTLQGCQYGDVPLLVLTIDPCISCTER	[NiFe] Group 4e	[NiFe] Group 4e	Evolving	Sensitive	6	[NiFe]-centre, 1 x [4Fe4S] clusters	NuoL, NuoH, NuoC, [FeS] protein	0.607912	0.214944	0	0	0	0.459812	1.91862	0	0	1.83824	0	3.25196	0	0	2.08484	0	0	2.765	0	0	3.17915	0.247683	0	1.78261	0	0.537368	0	0	0.377317	0	0.342266	0	4.79958	0	1.05872	0	0.867433	0	0	0	0
WP_014901644.1	MDIQLTINDIALKVPEGTTILEAARTVNIDIPTLCYLKLNEMHYNNNIASCRVCVVEIEGRRNLASSCSTPVSSGMVVRTDSLRAIQARRAMVELLLSDHPKSCLTCAKNQDCDLQSLASELGVRHISYEGDESEFEIDTSSSSIVRDPNKCIRCRRCETMCNDVQTVGVYSAVGRGFETVVKTAFDLPLSKTACTFCGQCIAVCPTGALTELDQVDKVWKALNDPNQFVVVQTAPAVRVALGEGFGLEPGTIVTGKMVAALRRLGFDRVFDTDFAADLTIMEEATELVHRIQHGGRLPLLTSCCPAWVKFFEHQFPDLLDIPSTCKSPHEMLGVLIKSYYAKTLGIDPKTITVVSVMPCVAKKYEAARPELSQGAETADVDIVITTRELARMIREASI…	[FeFe] Group A3	[FeFe] Group A3	Bifurcating	Labile	3	[FeFe]-centre, 3 x [4Fe4S] clusters, 1 x [2Fe2S] cluster	NADH dehydrogenase, thioredoxin	0.539325	0.295968	0	0.774999	1.41309	0	0	0	1.83881	2.75736	0.684393	1.62598	0	0	0.521209	0	0	0.921666	0	0	0	0.371524	0	0	1.24613	1.07474	0	0	0	0	0.342266	0.924102	0	0	0	1.78498	0	0.774432	0	3.80287	1.28633
WP_022095197.1	MIETENKVYARRCESHVEALRRAVPGCIEKVEWQCEDQLTITVKQDKLPEAVHYLYYERYGWIPVIIGNDERSLCGRYAVYYVISMEGEDPGWVTVRTEVDPAKMTFPSVTPFVPACVWGERELRDMFGLIPEGLPDRRRLVLPDDWPSGLYPLRKDSMDYRFRPAPASDMENYEFLADTKGKETTLVPMGPLHITSDEPGHFRLFVEGETIVDADYRLFYVHRGMEKVAETRLNYDAVTFLADRICGICGCAHSVAYAEAVERAQGIHVPPRAQYIRAIMLEVERLHSHLLNIGLASHYTGFDSGFQQFFRVREKSMDLAEKLSGHRKTYGLNVIGGVRRDILAEQKLSTLTTIHQLRSEVQELVDVLLSTPNFIERTSGIGILDRKIARDFSPVGPL…	[NiFe] Group 4a	[NiFe] Group 4a	Evolving	Sensitive	6 or 9	[NiFe]-centre, 1 x [4Fe4S] clusters	NuoL, NuoH, two [FeS] proteins, (three antiporter subunits)	7.91148	5.49438	8.75259	0	11.3047	17.9327	3.35759	0	18.8478	0	2.73757	9.75588	0	0	0	0	8.99305	0	0	0	0	6.31591	1.432	3.56523	0.996904	6.44842	0	0	4.15049	10.3426	4.27833	3.23436	82.3928	0	6.35234	10.7099	6.07203	1.54886	39.5908	5.43267	14.1496
WP_022741745.1	MVTITLNGQAVEVAEGSTLLEAATAAGVNIPTLCYLKDLNCIGSCRVCLVDVEGQGLVAACNTAAAEGMVVRTDTPQVAAARRANLQAIMDDHRALCATCVRQDTCALRFLSSTFNLQDAGEALPVPEPWDATFPLQRDSSKCIKCMRCVAICDKVQHCGVWDFTGAGPSMKVIVRDNLPIADAGCALCGQCITHCPTGALTARDDVSRIMDAILDPAVETVVQVAPAVRAAWGEGVGLSRDEATPGRLAAALHAVGFDRVFDTDFAADLTIMEEGSEFVEFLGSDAPRPMFTSCCPGWVRFVKQHYPQFTAQLSSAKSPHQMMGAVVKNTLAAEADEAGRRLFVVSIMPCVAKKYECDVPELSTVVGATHGNGTSDANLAPDAPAAPELAAEATPDVD…	[FeFe] Group A2	[FeFe] Group A2	Evolving	Labile	2	[FeFe]-centre, 3 x [4Fe4S] clusters, 1 x [2Fe2S] cluster	NADH-dependent glutamate synthase	14.3464	10.3258	39.1292	32.5499	5.65234	25.7494	1.43897	20.8187	0.459702	5.51471	16.4254	8.1299	0.686718	0	2.08484	0.53818	2.99768	1.84333	61.9954	0	54.0455	9.9073	1.432	8.91307	1.49536	38.6905	24.4597	7.39628	0.754635	11.3276	16.5999	2.7723	5.59951	0	25.4094	9.51988	16.9149	18.5864	9.8977	0	16.7223
WP_012033166.1	MITLTIDNQKVAVEPGSTILEAAKKLGINIPTLCYLKDINVIGACRICMVEVQGARTFVPACVAPVAEGMVVRTNTPAVIKARKLVLELILSDHPMECLTCVRNQNCELQKLAEQFGIKEVRFDGAKTEYPIDDSSPAIIRDPRKCVLCRRCVAVCSNIQTVNALTAQERGFDTLIAPAFNEKLANMECVQCGQCSLVCPTAAIQEKDDIDKVWAALADPKKHVVVQTAPATRVQLGETMGMEPGSIVTGKMVAGLRRLGFNKVFDTDFTADLTILEEGNELLQRIKTGGVLPMITSCSPGWIKFAEHFYPDLLPHLSTCKSPQQMFGALAKTYYAQKEGIDPADIFVVSIMPCTAKKFECQRPEMKDSGYQDVDVVLTSRELGRMFKQANINIAELPE…	[FeFe] Group A3	[FeFe] Group A3	Bifurcating	Labile	3	[FeFe]-centre, 3 x [4Fe4S] clusters, 1 x [2Fe2S] cluster	NADH dehydrogenase, thioredoxin	0.852362	0.50723	1.02972	0	5.65234	0.919623	0.959312	0	3.21791	4.59559	0.684393	1.62598	0.686718	0	1.04242	0	0	0	1.51208	0	0	0.247683	0	0	0	1.61211	0	0	0.377317	0.492503	1.0268	2.31025	0	0	0	0	1.30115	0.774432	0	2.71633	0
WP_021433568.1	MGDNKSTIIQSSLGSVFTVFSEEELKQITDSSRKIAISGKINNPGIIEVPESATLKDIIDLAGGIIKNRDFKAAQLGIPFGGFLTEDSLDKELDFTLFNSECSRTIIILSQEDCIVQYAKFYIDFLMGKMKDDKFKKYAKVKNEIMEMWKILDRISKGRSNMRDIFILRELANEVKNTLNQKHNIMQEIIDKFYGEIEEHIEDEKCYTAQCNNLVKLTITGKCIGCGACKRACPVDCIVGERKEQHYIDYNRCTHCGQCIASCPVDAITAGDNTLKFLRDLATPNKIVITQMAPAIRVAIGEAFGFEPGTNVEKKIAAALRKLGVDYVFDTTWAADLTIMEEAAELQERLEKHFAGDEDVKLPILTSCCPAWVKFIEQNYGDMLDVPSSAKSPMQMFAT…	[FeFe] Group A1	[FeFe] Group A1	Evolving	Labile	1	[FeFe]-centre, 2 x [4Fe4S] clusters	None	2.14299	1.64133	3.60401	1.55	0	0.919623	1.91862	29.5845	0.459702	2.75736	0.684393	1.62598	2.74687	4.6587	0.521209	0.53818	0	0	1.51208	1.57458	2.27082	0.247683	0	0	0	0	0	0	0.754635	1.47751	0	0	23.9979	3.73986	1.05872	1.18998	8.24061	9.29319	0	1.6298	0
WP_003534146.1	MTLDKDKCLGCTNCIKRCPTEAIRVREGKAQIISERCIDCGECIRVCPHHAKKARYDHLSVLEGWKYKIAIPAPALFGQFNNLDDIDIVLTGLKQMGFDDVYEVSRGAELVSDATRKLMADGRLPKPVISSACPAVVRLIRVRFPDLCDHVLNLNAPMEVSAMMAKRAASERTGIPIEEIGAFFITPCPAKVTDIKMPIGTEGSWCDGAIAISEVFPLLSHRMDKLETVEPIGQSGLIGVSWAGSGGESAALLNEKYLAADGIENVIRVLEELEDERIRELDFVELNACSGGCVGGVLCVENGYVAKARLQRLRKYLPVSQNHLDGGVPRDMEWTEPLEFAPVLKLSQNLEEAMQMMEEIDVICEGLPGLDCGSCGAPSCRALAEDVVKGVARTSDCVF…	[FeFe] Group C	[FeFe] Group C1	Sensory	Labile	2	[FeFe]-centre, 2 x [4Fe4S] clusters, PAS domain	Histidine kinase	27.6074	20.5359	69.5059	65.8749	11.3047	45.9812	15.349	4.38288	6.89552	11.9485	12.3191	9.75588	11.6742	11.6467	3.64846	0	56.956	11.06	13.6087	1.57458	39.5122	56.4716	7.16001	5.34784	13.9567	29.0179	41.9309	130.36	25.6576	24.6252	17.4556	25.4128	2.39979	4.75982	16.9396	4.75994	6.50575	14.7142	5.59435	42.3748	2.57266
WP_026891848.1	MQTFKELYESTVRSVLDDGSVSPEAGNYDPYHLDCLLNPEKHPIVIRTGKCNCSKDEKCDCLERCPFGALSMGKDGVEVDPELCLGCDNCIEGCAREKLTASTDIIPALKAIRGSKGLVYAMIAPAFLGQFTNDVTPGKLRNALKEVGFDGMLEVALFADILTLKEALEFDKNIVNDGDFQLTSCCCPMWIGMIRKVYHQLLPHVPGSVSPMVACANVVKALHPDAMTVFIGPCLAKKAEAREKDLVGAVDYVLTFQEVKNIFDALGIDPADMEESEKDHSSRAGRIYARKGGVSEAVELTVKAIDPEKKTKIITKRADGVPACKKMIQDIMEGNIEANFYEGMGCVGGCVGGPRSILDVEHGTKLVNEYGKNATYQHPAENPYVIELLHRLNLDTIES…	[FeFe] Group B	[FeFe] Group B	Evolving	Labile	1	[FeFe]-centre, 2 x [4Fe4S] clusters	None	0.477916	0.129788	0.514858	0	2.82617	0	0	0	0	0	0.684393	0	0	0	1.04242	0	0	0	0	0	0.454164	0.123841	0	0	0.747678	0	0	0.924536	0	0	0.171133	0.462051	0	0	0	0	0	1.54886	0	0.543267	0
WP_009277946.1	MAGSMRGVYTNLTEIRRNVFREVAKVCYAMGDDPGKTDSDIDDAFDELPFKILPGDVATYRESVFLERAIIGERIRLAMGLPLQGVERPARISDGFKEAETADLAYYEPPLINVIKFACNACKDNVYEVTNTCQGCLAHPCREICPKNAISFVDKRAFIDQDACIHCGMCAKTCPYQAIHHHVRPCAAACGMNAIGSDEHGRADIDYEKCVSCGQCLVNCPFGAIADKSQIAQVIWAIHSGQEVIAAVAPSFVGQFGGKGNVGKLREAFKLLGFSGVEEVALGADLCTMQEAEDFLEEVPDKLPFMGTSCCPAWSVMAKREFPEHANCVSMALTPMTLTARMIRAQHPNAKIVFVGPCAAKKLEAMRRSVRSEVDFVLTFEEMAGMMASKDIDYLSLED…	[FeFe] Group B	[FeFe] Group B	Evolving	Labile	1	[FeFe]-centre, 2 x [4Fe4S] clusters	None	1.62896	1.29194	0.514858	0	2.82617	0.919623	0.959312	2.19144	2.29851	1.83824	3.42196	0	0.686718	0	2.60604	0.53818	0	2.30416	1.51208	0	1.81665	1.11457	0	0	2.49226	3.22421	2.09655	0.924536	4.52781	0.492503	1.71133	1.8482	4.79958	0	0	2.97496	0.867433	1.54886	0.430335	8.69227	2.57266
WP_027717485.1	MSLINITIDGRPVQVPPGTTILEAARKAGVKIPTLCYLEELSVIGACRLCLVQVEGARTLVAACVAQAGEGMVVHTNTPAVRQARRVNLELILSNHPRECLTCLRNTNCELQRLAAELGVDQVRFEGEMSPYGVDDSSPALVRDPRKCVLCRRCVAVCSEVQGVSAIAVQERGFDTVVAPAFLAPLGEVSCVNCGQCSLVCPTAAIHERDQTAEVWAALADPEKHVVVQTAPAVRVSVGEMFGLEPGSIVTGKLVAALRRLGFDRVFDTDFAADLTIMEEANEFIHRLQNGGPLPLITSCSPGWIKFIEHFYPQLLPNLSTCKSPQQMFGALAKTYYAQRAGIDPAKIFVVSIMPCTAKKFEARRPEMRASGYWDVDVVLTTRELGRMIKQAGFDFASL…	[FeFe] Group A3	[FeFe] Group A3	Bifurcating	Labile	3	[FeFe]-centre, 3 x [4Fe4S] clusters, 1 x [2Fe2S] cluster	NADH dehydrogenase, thioredoxin	0.654413	0.252788	0.514858	1.55	1.41309	0.919623	0	1.09572	0.459702	0	0.684393	0	0	0	4.69088	3.76726	0	0.460833	1.51208	0	0	0.619207	1.432	0	0.498452	0.537368	0.698849	0	0	0	0	0.924102	0	0	0	0	0.433716	0	0	4.34613	0
WP_006874974.1	MTRDKTGRSCKMRGIYTSVTDIRRKVFTEVARLAYEGGDYSRIEGLPYKIVHGETAQYRDSIFLERAIVGERLRLAIGLPLRPMDEHAPVSMGINQSAVAEKYYDPPLVNIIKFACNACPEKQYRVTDCCQGCLAHPCKEVCPRDAVSIVHGKSVIDQEKCIKCGRCAEVCPYGAILKLERPCASACGMDAISSDEHGRAVIDYDKCVSCGMCIVNCPFGAISDKGQIFQVIQSIKKGDRVIAIVAPAFVGQFGPAMTPEKFTAAMKQLGFDSVVEVAIGADLCTIEEAKDFMRAVPEEQPFMATSCCPSWSVMAKKLFPTLAPYISMALTPMVLTARLQKKEHKGCKIVFVGPCSAKKLEASRRTIRSDVDFVLTFEELMGMFVAKGVKFGDIKEEKP…	[FeFe] Group B	[FeFe] Group B	Evolving	Labile	1	[FeFe]-centre, 2 x [4Fe4S] clusters	None	40.7161	30.4972	36.0401	81.3749	70.6543	112.654	43.6487	33.9673	22.9851	37.6839	39.0104	45.5275	40.5163	34.9402	50.0361	2.6909	20.9838	147.467	104.334	12.5966	13.6249	31.3319	20.048	16.0435	35.3901	44.0642	48.9194	65.642	41.8822	8.37255	21.9051	25.8748	6.39944	24.1391	51.8775	23.2047	58.118	46.4659	15.9224	70.0814	2.57266
WP_009132358.1	MEEKQITLQIDRHYITVPEGSTILEAARKIGIDIPTLCHIDLKGTCVKNNPASCRICVVEVEGRRNLAPACATRCTEGMVVRTSTLRVMNARKVVAELILSDHPNDCLTCPKCGDCELQTLALRFNIRRMPYNGGELSPRKREVTSSIVRNMDKCIFCRRCESVCNEVQTVGALGAIRRGFNTTIAPAFDKMMSDSECTYCGQCVAVCPVGALTERDHTNRLLLDLENPDKVVIVQTAPAVRAALGEEFGLPAGTLVTGKMVYALRELGFDYVFDTDFAADLTIMEEGAEILNRLTRYMNGDKSVRLPILTSCCPAWVNFFEHHFPDMLDIPSTARSPQQMFGSIAKTFWAEKMGIPREKLVVVSIMPCLAKKYECDRNEFKTDGSPDVDYSISTRELA…	[FeFe] Group A3	[FeFe] Group A3	Bifurcating	Labile	2	[FeFe]-centre, 3 x [4Fe4S] clusters, 1 x [2Fe2S] cluster	NADH dehydrogenase	0.401825	0.066627	0	0	0	0	0	0	0	0.919119	0	0	4.12031	0	0	0	0	0	1.51208	0	0	0.371524	0	0	0	0.537368	0	0	0	0	0	0	0	0	0	0	0	0	0	0	0
WP_012625505.1	MTSTFTMPLGPVHVALEEPVYFHLTVDGETVRHVELTSGHVHRGMEAMATQRNLVKNVTLTERVCSLCSNSHSFTYSMVVENVLGITIPDRARYLRVVAEEIKRIASHLFNTAIQAHIIGFKSLFMHVMEVREMMQDLKETVYGNRMNLAANCIGGVKYNVNAELLDYMRKMLDKVEPQVDEIREIYDTNSMVLARTKGLGVLPKEDAIRLGVVGPVARGSGLQLDVRKDSPYAAYPDVEFKTIVEQSGCIHARTMVRMHEVLESFSIIRQCIARMPEGEVTAPMRQIRTAEACARSEAPRGEVFYYIRTNETDIPSRLKWRVPSYMNWEALGVMMRDCKVADVALITNSIDPCVSCTER	[NiFe] Group 4c	[NiFe] Group 4c	Evolving	Sensitive	7	[NiFe]-centre, 1 x [4Fe4S] clusters	NuoL, NuoH, NuoC, [FeS] protein, polyferredoxin	0.359484	0.00581052	0	0	0	0	0	0	1.3791	0.919119	0	3.25196	0	0	0	0	0	2.30416	0	0	0	0.247683	4.29601	0	0	0	0	0	0	0	0	0	0	0	0	0	0	0	0	0	0
WP_003512576.1	MSPYFHSVTLDEVKCKGCTNCIKRCPTEAIRVRKSKARIINERCIDCGECIRVCPYHAKKAITDPIGLINDYKYKVAIPAPSLYGQLKSAPSRDHILTALKMCGFDDVFEVARAAEIITSETKKILAQQRFEKPLISSACPAVVRLIQVRFPNLIDNILKLKSPMEVAAKIAKDEISRNRKIRQEDIGVFFITPCAAKVTSIKAPLDKEKSFVDGAISISEIYLKILSALGKIDKPEKLSRAGFVGVRWANSGGESIALGTDKFLAVDGIHNVIAILEEIEDEKLEDIDFVEALACQGGCLGGPLNVENMYVARKTIKKFIDDAKEKGLETAADENCNYDIAWTGKVEYKPVMKLDKDFDVAMKKLETLNVINSGLPGLDCGACGAPSCRALAEDIVRG…	[FeFe] Group C	[FeFe] Group C1	Sensory	Labile	2	[FeFe]-centre, 2 x [4Fe4S] clusters, PAS domain	Histidine kinase	1.08107	0.584249	1.02972	1.55	2.82617	2.75887	0	0	0.919403	1.83824	2.73757	0	2.06015	0	0	0	0	0.460833	0	0	0	0.99073	0	0	1.49536	0.537368	0.698849	4.62268	0.754635	1.47751	0.171133	0	0	0.339987	0	0.594992	1.30115	0	0	0.543267	0
WP_013626003.1	MSNVTLKIDGIEVSVPKDYTILQAARQANIEIPTLCYLQGLNEPASCRICVVEVEGWRGLQPACVTKVVEGIVVKTASKVVRETRKGILELILANHNRECLSCTRNQNCELQKMSEEMGVGEVYYQKKAARAAMDKTGPVVRDTSKCVLCGRCVSVCSSVQNVDAIDFAHRGPQTSVTTPYEEKLTARNCINCGQCIKVCPVGALSERDDTDLVWAALENSELNVVVQTAPAVRIALGEEFGLPVGTDVEGKMVTALKKLGFDKVFDTNFSADLTIMEEGTELISRINNGGKLPLITSCSPGWIKFCEHKYPDFLDNLSSCKSPQQMFGAVAKSYYPEKAGIDPKKVFVVSVMPCTAKKYEADREELVVDELKDIDVAITTRELAKMIKQAGIQFTDLA…	[FeFe] Group A3	[FeFe] Group A3	Bifurcating	Labile	4	[FeFe]-centre, 3 x [4Fe4S] clusters, 1 x [2Fe2S] cluster	NADH dehydrogenase, thioredoxin, thioredoxin	0.452489	0.112348	0	0	0	0.919623	2.39828	0	0	1.83824	0	0	2.74687	0	0.521209	0	0	0	0	0	0	0.495365	0	0	1.24613	0	0.698849	0.924536	0.377317	0	0	0	0.799931	0	1.05872	0	0	2.3233	0.430335	0.543267	1.28633
WP_026887313.1	MGDNKKSFIQSALGSVFSVFSEDELKELSNGRKIAICGKVNNPGIIEVPEGATLNEIIQLCGGLINKSNFKAAQIGLPFGGFLTEDSLDKEFDFGLFYENIARTIIVLSQEDCIIQFEKFYIEYLLAKIKDGSYKNYEVVKEDITEMFNILNRISKGVSNMREIYLLRNLAVTVKSKMNQKHNIMEEIIDKFYEEIEEHIEEKKCYTSQCNHLVKLTITKKCIGCGACKRACPVDCIDGELKKKHEIDYNRCTHCGACVSACPVDAISAGDNTMLFLRDLATPNKVVITQMAPAVRVAIGEAFGFEPGENVEKKIAAGLRKLGVDYVFDTSWGADLTIMEEAAELQERLERHLAGDESVKLPILTSCCPSWIKFIEQNYGDMLDVPSSAKSPMEMFAIV…	[FeFe] Group A1	[FeFe] Group A1	Evolving	Labile	1	[FeFe]-centre, 2 x [4Fe4S] clusters	None	0.66555	0.274354	0	0	0	0	0	4.38288	0	3.67647	1.36879	0	0	0	0	0	0	0.460833	1.51208	0	0.908327	0	0	0	0	0.537368	0	0	1.13195	0	0	0.462051	7.99931	1.01996	0	2.97496	1.30115	3.09773	0	1.6298	0
WP_012282699.1	MSNGSVNGRKYETTIQMIRHEVFYQVAKMAMEGSLQAHREFIPVIVFQGNKARFRCCVYKERAVAAERVRLACGEAPQSGVAYEAAESGIPDPLVRVIAIACDECPVDRFTVTGACRGCITHRCIEACPVDAIAQINRLAYINQQKCIECGRCHQVCPYGAITDMQRPCIKACPVKAIQYGEDKIARIDPNKCVSCGHCAVSCPFGAISDLSYIPQAVEMLKTQDGTVHAVLAPSVASQFPGISIGQVHHALKKLGFAAVHEAALGADMIVDHEAKELAEKLKEGSFLTNSCCPAFVSLIEKHFPTLKGNISTSVSPMVAVGRYVKKLHPEAKTVFIGPCYAKKVEIGLPKCKGHIDLALTFEEIFAMFDAAGISLADCPDEPLQQASPFGRRFARCGG…	[FeFe] Group B	[FeFe] Group B	Evolving	Labile	1	[FeFe]-centre, 3 x [4Fe4S] clusters, 1 x [2Fe2S] cluster	None	1.03987	0.540408	0.514858	0	2.82617	0	0	0	0	0	2.73757	4.87794	0	0	1.04242	2.15272	0	0.921666	3.02417	3.14915	1.81665	0.247683	0	0	0.249226	0.537368	0.698849	0	0	2.95502	0	0	0	1.01996	3.17617	1.78498	0	0.774432	0	0	0
WP_009146318.1	MVNLTIDGQKVSVPQGTTIMQAAATVGIEIPRLCYLKGINEISACKVCVVEIQGQNRVVTACTTPVQEGLVVYTNSPKARSIRRTNVELILSQHDCMCATCVRSGNCSLQTLANDLGIYDIPYERDVVDTPWNQEFPLIRDSKKCIKCMRCVQICDKVQKLHIWDVQNTGARTTVDVAGNVSIEDSDCSLCGQCITHCPVGALKERNDVPKIYDVLADPNKVTVVQVAPAVRTSWAEAFNLPPELATEGRMVATLKKIGFDYVFDTCYAADVTIMEEASELLEHLQKPQDHSWPMFTSCCPGWVSYVNKTHPYFVPNLSTTKSPQQIFGALAKSYFAQKKGLKPKEICSISIMPCVSKKREAALFSMRSSGTHDVDIVLTTREFIRLLRAEHINPAMLD…	[FeFe] Group A2	[FeFe] Group A2	Evolving	Labile	2	[FeFe]-centre, 3 x [4Fe4S] clusters, 1 x [2Fe2S] cluster	NADH-dependent glutamate synthase	10.3472	4.65456	6.1783	6.19999	1.41309	2.29906	11.9914	0	53.7851	4.59559	36.2728	0	8.24061	0	0.521209	5.3818	2.99768	12.9033	3.02417	206.269	3.17915	61.9207	10.024	10.6957	1.24613	2.68684	2.79539	0.924536	12.8288	1.47751	2.90926	4.62051	0.799931	1.35995	4.2349	4.16495	1.30115	1.54886	0	3.80287	4.50215
WP_013780872.1	MDNNYFHSVTLNKEKCRGCTNCIKRCPTEAIRVRAGKANITAERCIDCGECIRVCPYHAKLAVTDPVDVISKYKYTIALTAPTLYGQFKRIEDALAVDDALKALGFDDVFEVAKAADIAAHFIKQRIESADIPRPIISSSCPVIVRLIQVRFPSLIEHMVDVWSPMEIAGYIAKQRAIETTGYDPDDIGAFFITPCPAKMTAIRHPIERRTSSVDGAIAISDIFGHIVAEVGGISSSRGAIEASSFGLGWANSGGESLSIGADNSLAVDGIQNVIKVLEEIEDDKMNDLDFFEGLSCPGGCVGGPLTVENGFVARNRIRKWAKSLSGQLYMTSLPRAPYFEQPILPNPAMKLDDDINAAMEKMQRIEIITDELPGLDCGSCGSPSCRALAEDIVQGKAS…	[FeFe] Group C	[FeFe] Group C1	Sensory	Labile	2	[FeFe]-centre, 2 x [4Fe4S] clusters, PAS domain	Histidine kinase	0.72353	0.298315	0	0.774999	0	0	0.959312	0	0	0	2.73757	0	0	0	0	0	0	1.84333	0	0	0	1.11457	2.864	3.56523	3.23994	2.14947	0.698849	0	1.13195	2.95502	0	0.462051	0	0	0	0	2.16858	0.774432	0	0.543267	0
WP_007665069.1	MAFTNNIMIVRHRLLTELVKLWRDNELVEKIDRLPIELSPRRSKHAGRCCVHKERAVWKYKSLPLLGLDMEDEKDELTPLSEYAVHALDRAENGTPKDNIMCVIDEACSACVQINYEITNLCRGCTARSCQTNCPKKAVHVKESGQAWIDHDECISCGICHKSCPYHAIVYIPVPCEEACPVKAISKDKKGIEHIDESKCIYCGKCLNACPFGAIFEVSQVFDILHKIRKGEKIVAIVAPSILGQFKTTIEQVYGALKAVGFTDVIEVAQGAMDTVSNEAHELIEKLEEGQKFMTTSCCPSYIELVNKHIPGMKPYVSSTGSPMYYAARIAKEKYPDAKVVFIGPCVAKRKEAQRDEAVDFVMTFEEVASVLDGLDIQLEQSQPYTMSFASVREAHGFA…	[FeFe] Group B	[FeFe] Group B	Evolving	Labile	1	[FeFe]-centre, 3 x [4Fe4S] clusters, 1 x [2Fe2S] cluster	None	0.493878	0.137016	0	0	0	0	0	0	0	6.43383	0	0	10.9875	0	0	0	0	0	0	0	0	0	0	0	0	0.537368	0	2.77361	0	0	0	0	0	0	0	0	0	1.54886	0	0	0
WP_013610540.1	MEQNITLQIDNHIVEVAKGTTILEAARGVGIQIPSLCYMNLKDMCITNLPASCRICVVEVEGRRNLAPACATRCENGMKVKTSSLRVLNARKTVLELILSDHPNDCLICPKSGNCELQNLAVKLKIREIPFAGERNILPIETSPSIVRDMSKCIYCRRCEMMCNEVQTVGALGAVNRGFISTIAPAFDEPLSNSACTFCGQCVAVCPVGALTEVDHTNRLISDLSNPKKTVIVQTAPAVRAALGEEFGLTPGTSVTGKMVAALRQLGFDKVFDTDFAADLTIMEEGSELLDRLTRYLKGDKDVCLPILTSCCPAWVNFFEHQFPDMLDIPSTARSPQQMFGAIAKNYWAEKMNIPREDLIVVSIMPCLAKKYECAREEFATQGDPDVNYSLSTRELASL…	[FeFe] Group A3	[FeFe] Group A3	Bifurcating	Labile	3	[FeFe]-centre, 3 x [4Fe4S] clusters, 1 x [2Fe2S] cluster	NADH dehydrogenase, thioredoxin	4.30621	4.56777	0	0.774999	12.7178	1.83925	0	1.09572	3.67761	8.27207	3.42196	6.50392	4.80702	2.32935	0.521209	0	8.99305	1.3825	1.51208	1.57458	0	10.6504	24.344	0	0.249226	2.68684	4.19309	3.69814	2.2639	0	17.4556	2.31025	0	0	1.05872	1.18998	0	1.54886	0	7.60573	2.57266
WP_015536221.1	MAKRSVIPFGPQHPVLPEPIHLDLVLEDEVVVEAIPNIGFVHRGLEKLVETKDYKQYVYIAERVCGICSFGHGLGYCESIEHMMNIDVPRRAKYLRTLWMELSRIHSHLLWLGLLADALGFEALFMQSWRLREKVLDLFDMTTGGRIIFSVNQVGGVLKDIDPSMLKIIDQTLTDMEKELKPITRTFLEDRLVNSRLRGLGVLSKEQAYIAGACGPMLRASGVPYDSRETGYAAYSELNFGPIIAIEGDSYARVKVRLAEIMQSFEILHELISKIPQGEISVPVKGNPKGECFIRIEQPRGEAIYYTKGNGTKYLDRFRLRTPTTSNIPAMLDLLKGCQLGDVALLILTIDPCISCTER	[NiFe] Group 4e	[NiFe] Group 4e	Evolving	Sensitive	6	[NiFe]-centre, 1 x [4Fe4S] clusters	NuoL, NuoH, NuoC, [FeS] protein	1.20716	0.636918	0.514858	0	2.82617	0	0	1.09572	0	0	1.36879	30.8936	0	0	0.521209	0	0	0.460833	0	0	0.454164	0.123841	0	1.78261	0.498452	0.537368	2.79539	1.84907	4.15049	0	0	0	0	0.339987	1.05872	0	0	0	0	2.71633	3.85899
WP_006007878.1	MSKLTTFNMPLGPVHVALEEPVYFNLTVEGETIRKVELTSGHVHRGMEALATQRNLIKNVTLTERVCSLCSNSHSFTYSMAVENVLGMEIPVRAHYLRVLAEEIKRVASHLFNTAIQAHIIGFKSLFMHVMEVREMMQDVKETVYGNRMNLASNCIGGVKCDVPPDMLTYILGMVDKVEPAVDEIREIYATNAMVLGRTKGLGLLPREDALRLGVVGPVARGSGIAIDVRKDSPYAAYPDLEFKSITHDGCCIHSRTMVRLDEIFESFKLIRQCCERMPEGPHCVPMRQIHTAEACARSEAPRGEVFYYIRTNGTDIPARLKWRVPSYMNWEALGVMMRDCAVADVALITNSIDPCVSCTER	[NiFe] Group 4c	[NiFe] Group 4c	Evolving	Sensitive	7	[NiFe]-centre, 1 x [4Fe4S] clusters	NuoL, NuoH, NuoC, [FeS] protein, polyferredoxin	1.1077	0.562631	0	0	18.3701	0	0	0	1.3791	0.919119	0	0	0	0	0.521209	0	0	0	0	0	0	24.0252	2.864	0	0	0	0	0	0	0	0	0	0	0	0	0	0	0	0	0	0
WP_017890120.1	MRDAEKKVVIVDGQEIPLEGEKNILEVAKKADIDIPTFCYHSDLSVYGACRMCLVEVEGRGLMPSCSTPPEPGMVIHTNTARVLAARKMIVELYLANHDRDCTVCERNLNCRLQEMASRMGITRVRFGERTEKDPKDDSTFALVRDPNRCILCGDCVRACREIEGIGIYDFTHRGARARVEPAFGKKLSEVECVYCGQCAIRCPTAALVVKSEVDAAWKAVLDPEKFVVAQIAPAVRVAIGEAFGLPPGEITTGKIVAALKKIGFDRVYDTSFSADLVVIEEAEEFFRRLQSNSRLPQFTSCCPSWVVFAERNYPFYLEHLSSVRSPQQVFGSVIRNFVSQMEDVPNERLVSVSIMPCVAKKFEARRAEYVHDGTPDVDIVLSAQETIKMIKMANIDFR…	[FeFe] Group A1	[FeFe] Group A1	Evolving	Labile	1	[FeFe]-centre, 3 x [4Fe4S] clusters, 2 x [2Fe2S] cluster	None	0.344813	0.0538963	0	0	1.41309	0	0	0	1.3791	1.83824	0	0	0	0	0.521209	0	0	0	0	0	0	0.743048	0	0	0.996904	1.61211	0.698849	0	0	0	0.684533	0	0	0	0	0.594992	0	0	0	1.08653	0
WP_006235348.1	MVEPNNPTVSDNTESGALNMVKLTIDNCEVMVPEHTTILDAAKSAGIQIPTLCYLRDLNEIGGCRVCVVEVEGCDQLVAACNNYVLDGMVVHTNSPKAREARRTNVQLLLSQHDSRCTSCVRSGNCNLQTIANDLGIFYLPYEQHLAREGWDFDFPIIRDNDKCIKCMRCIKVCESVQGLGIWDLTNRATHTAVGTRGRAPIGKTDCVACGQCITHCPTGALRERDDTETVFDAIADPDKIVLVQIAPAVRSAWGEELGISREEATVERLACALRRVGFEYVFDTDFSADLTIMEEGSELLERLGKAAKGEGDSRGWPMFTSCCPGWVRFVKARYPEFVDRLSTSKSPQQMFGAIAKTYYAKVLGVEPERLFVVSVMPCTAKKAECALPSMMGEDGAPD…	[FeFe] Group A2	[FeFe] Group A2	Evolving	Labile	2	[FeFe]-centre, 3 x [4Fe4S] clusters, 1 x [2Fe2S] cluster	NADH-dependent glutamate synthase	25.0953	19.4821	1.02972	3.87499	48.0449	42.7625	39.3318	28.4887	37.2358	24.8162	22.585	39.0235	0	0	17.1999	0.53818	0	1.84333	0	7.87288	0.454164	25.8828	17.184	17.8261	12.2121	16.1211	1.3977	3.69814	29.8081	26.1027	1.5402	2.7723	105.591	0	20.1158	29.1546	82.8398	13.9398	71.0053	41.8315	40.5194
WP_007290224.1	MSQVTEVVKIRRKVLSEIARLAFEGKLQDHVEDILHTVVTEEGPRYRCCVHKERAVLKDRINLALSQPINTDLKVAAQNALEGKIADMPFVNVLPEACDRCPIDKFIVTDACRNCVAHHCINSCPKKAIAVVQNRAFIDKNRCVECGLCKRSCPYGAIIEVSRPCERACDLKAVVAGADRRAVINYDKCVQCGACKIACPFGAIGDRSVIVQLIQDLKHHKKVYAIIAPSFIGQFGLKVRPGQVINALKQLGFYDVQEVSFGADIVTVEETKEFAATVPGERSFMTTSCCPAFVGMVEKHLPELRDKVSSTVSPMIATGKSIKVDDPEAIVVFIGPCIAKKVEAARYAGVIDYVLTFEELAAMLVGAGINVTEVADSEYQTTASRDGNIFARAGGVAQA…	[FeFe] Group B	[FeFe] Group B	Evolving	Labile	1	[FeFe]-centre, 2 x [4Fe4S] clusters	None	0.417473	0.104136	0	0	0	0	0	0	0.919403	3.67647	0	0	0.686718	0	0	0	0	0.460833	0	3.14915	0	0.619207	0	0	0.249226	0	0	0	0	0	0	0.462051	0	0	2.11745	0	0	0.774432	0	0.543267	0
WP_009609852.1	MDKVRVTIDGITVEVPSYYTVLEAAKEAGIDIPTLCYLKEINQIGACRICLVEIEGVRNLQTSCTYPVFDGMKVYTNTPKIREARRLNLELILSNHDRNCLTCVRSTNCELQALAKRLGVEEIRFEGENIRYPIDDGSPAVVRDPNKCVLCRRCVAVCSEVQNVFAIGMVNRGFKTMVAPSFGRSLKDSPCISCGQCIMVCPVGAIYEKDHTKRVYEALADDKKYVVAQTAPAVRVALGEEFGMPVGTIVTGKMAAALRRMGFDAVFDTNFAADLTIMEEGSELLERIKHGGKLPMITSCSPGWIAFCEKYYPEFIDNLSTCKSPHMMMGALVKSYYAEKKGLDPKDIFVVSIMPCTAKKLEIEREEMIRNGMKDVDAVLTTRELARMIKEMGIDFVNL…	[FeFe] Group A3	[FeFe] Group A3	Bifurcating	Labile	4	[FeFe]-centre, 3 x [4Fe4S] clusters, 1 x [2Fe2S] cluster	NADH dehydrogenase, thioredoxin, thioredoxin	0.737263	0.367053	1.02972	0.774999	1.41309	1.37943	0.479656	0	0	2.75736	0.684393	0	1.37344	0	0	0	0	2.30416	1.51208	0	0.454164	0.866889	0	1.78261	0.498452	0	0	0.924536	1.13195	0	0.5134	0.462051	0	0	1.05872	0	0	1.54886	0	3.80287	0
WP_019880475.1	MQISESVKLHRKVLTEVARQTVNGTLDTDVESILQTVVSEAGPRYRCCIHKERAVLKNRITLAVGRSVEEDIHEATQKALKGEVLKEAAVLTVLPEACDQCPIDKFIVTDACRNCIAHNCINVCPKKAITIHQNRAYIDQEKCVECGACKRACPFGAIIEISRPCERACAVKAISAGSDRRAVIDIEKCVECGACKVACPFGAVADRSFIVPLIQDLKTTKKVFAMVAPAFVGQFGAGISPKKIFQALKQLGFSGVYEVALGADMVTLFEAEEFLETVPEQRKYMTTSCCPAFADLIRKHMPNILPHMSSTTSPMVATAEIVKKEYPDSVAVFIGPCAAKKSEARRYPDLIDYVITYEELAAMMVGAGINVTEIVEEDVEFLASRHGAIFGRAGGVLEA…	[FeFe] Group B	[FeFe] Group B	Evolving	Labile	1	[FeFe]-centre, 2 x [4Fe4S] clusters	None	1.4416	0.895405	0.514858	0	4.23926	0.459812	0	0	0	9.19119	0.684393	0	8.92733	2.32935	0	0.53818	2.99768	3.68666	4.53625	1.57458	0	0.123841	0	0	3.23994	0.537368	1.3977	0.924536	0	0	2.0536	0	0	0	0	0	1.30115	2.3233	0	0	0
WP_006524079.1	MIVTNEARCRDCYRCLRACPVKAIRISASEETGALYARVIDELCVKDARCVLICPQKAKKVTSSLAEVRHSIKNGNFMVASVAPSFVVGLPLADPGHMPALLRRLGFKKVQETSLGAALVARQHGRMGFDKALISSACPVVVNLVERHYPEALPYLAPIVSPMIAHGRYLKESYPGCKTVFIGPCAAKKDEALVNGISDAIDYVLGFDELWEWVQEENIDCSGLAADEFDGPKPGLARLFPIDGGMLKTVGVSKQADERFTTVSGLQNCIDFIKHLASGGIILPGLVELLACPGGCINGPQMMGRDEGLFNRRRKVIEYQKSQCRSEGDDVATITDINEKLLQRSFVNRQVVFPVPSEAEIKEILERSGKFKPEDELNCGACGFDTCRDKAIAVYQGNA…	[FeFe] Group C	[FeFe] Group C3	Sensory	Labile	2	[FeFe]-centre, 2 x [4Fe4S] clusters, PAS domain	Phosphatase	0.458238	0.135737	0	0	0	1.37943	0	0	0	0	0	0	0.686718	0	0	0.53818	0	0	0	0	0	0.247683	0	0	0	2.14947	1.3977	0.924536	0	0	0.342266	0	0	0	1.05872	0.594992	0	0.774432	0	0.543267	0
WP_006524080.1	MQTGRVIIDGQAVEIAGAKNLLELVRRTGVELPTFCYHSELSVYGACRLCMVEVEKMGLVASCSTPPSEGMVIYTNTMRTKRLRKVILELLLANHDRECPTCVKSTTCKLQKLAKQYGVNKIRFGSRDVKLPIDDSSSSIVKDPNKCILCGDCVRMCKEIQGLGIWDFAFRGSKTQVTTAFGKELSEVDCINCGQCITVCPTGALTAKSEVEQAWKAILDPSKTVVFQIAPAVRVALGEEFGLSAGSAVTGKVVAALKKLGADKVFDTLFAADLTTIEESMEFISRLEKGDKLPLFTSCCPAWVKYCEQAHADLLANISSCRSPQQMFGSLVKKHYAQVIGKEPGEVVCVSVMPCTAKKFEATRPEFTTGGVRDVDIVLTTVELAQMIKEAGIVFNELE…	[FeFe] Group A3	[FeFe] Group A3	Bifurcating	Labile	3	[FeFe]-centre, 3 x [4Fe4S] clusters, 2 x [2Fe2S] cluster	NADH dehydrogenase, thioredoxin	0.532722	0.200786	0.514858	0	0	0.459812	0.479656	0	0	0.919119	0.684393	0	0.686718	0	2.60604	3.22908	0	0	0	0	0	0.619207	1.432	0	0.249226	0.537368	0	0	1.13195	0	0.684533	0.924102	0.799931	0.339987	4.2349	0.594992	1.30115	0.774432	0	1.08653	0
WP_021739954.1	MENITIKINGREVSAPQGSTILEAARLAQIEIPTLCYLKEINEIGACRMCVVEVKGARSLVTACVYPINEGMEVWTNTPKVIASRRKTLQLLLSNHDRKCLSCVRSGNCELQTLCREYKVDDEAYYDGERNKYELDTSAAHMVRDNNKCILCRRCSAVCEKVQGVGVIGANERGFKTYIGTAFDMDLGDTSCVSCGQCIAVCPTGALYEKDNTEEVFAAIADPEKYVVVQCAPAVRAGLGEAFGMPIGTDVEGKLAAALRRLGFDKVFDTTFSADLTIMEEAHEFLDRVQNGGVLPLITSCSPGWIKYCEHYFPEMTENLSSCKSPQQMFGAIAKSYYAEKMGIPKEKMVVVSVMPCTAKKFEIGREDENGAGVPDVDIAITTRELGRMIERASIRFTD…	[FeFe] Group A3	[FeFe] Group A3	Bifurcating	Labile	4	[FeFe]-centre, 3 x [4Fe4S] clusters, 1 x [2Fe2S] cluster	NADH dehydrogenase, thioredoxin, thioredoxin	18.4638	14.7402	15.9606	37.9749	12.7178	33.5662	18.7066	7.67005	22.0657	17.4633	19.8474	6.50392	8.92733	4.6587	10.9454	8.61088	0	6.45166	19.6571	9.44746	41.7831	16.5947	14.32	23.174	24.9226	7.52316	11.1816	20.3398	15.0927	44.8178	28.237	22.1784	7.19937	18.6993	14.8221	10.1149	27.3241	4.64659	12.0494	16.298	20.5813
WP_006362914.1	MNVVNIKLNGYDYAMEKGMTVLDASFETMKFKKEYLNHPIPTLYYLQGIVDVDESGVCVAEVDGKLVNASTTRIGEGMEIETMSPKAVEARKEALSRILAVHDKDCLHCLRSSSCELQTLLKDYGFTDEPDIPDDNIEEIDTSSVVLIRDNNKCIRCKRCVNVCAKMQAVSAIACTGTGLDATIAPSSPSGLAAASCVNCGQCVAVCPVGALVEKTCIDEVNAALADPKKYVAVQVAPAVRAALGEDFEFPLGIDVEGRIAEGLRLLGFDKVFDTKFGADLTIVEEANELVDRIAHDGVLPMITSCCPGWIKYAEHFYPDMLDNISSCKSPHQMHGAIVKSFLAEREGLDKEDIVTVSVMPCTAKKFECTRNDEDGAGVPDVDIVVTTNELAKMFKDAG…	[FeFe] Group A1	[FeFe] Group A1	Evolving	Labile	1	[FeFe]-centre, 2 x [4Fe4S] clusters	None	6.75447	12.0244	1.02972	11.625	5.65234	6.89717	4.3169	5.4786	10.5731	0.919119	5.47514	1.62598	0	0	4.16967	4.30544	2.99768	0.460833	3.02417	3.14915	41.3289	3.96292	5.72801	21.3914	0.498452	3.76158	9.78388	0.924536	5.28244	22.1626	8.55666	12.0133	3.19972	13.5995	0	8.32989	0	0.774432	6.88536	1.08653	7.71798
WP_007960496.1	MVAKKIQENIKIDAELCTGCGRCSEVCPVDAIEGEEGKPQSVNVAKCVMCGQCVQICSAYDSPFEQYATSRSQRLKERNMPVVKEPLFAAYYHGDFFKVKKRLADKKQFSMVQCAPAVRVSLAEEFGMPLGSLVPGKMVAALKRLGFTRVYDTNFAADLTIMEEGSELVKRITEGGSLPMFTSCCPAWVKFVENEYPELIDHLSSCKSPQQMAGSMFKTYGASVDGVDAREVYSVAIMPCTCKKFEASRPEMKSSGYQDVDAVLTTRELAYLIKEAAIDFNALPEESFDKPLGMYSGAGTIFGVTGGVMEAAIRTAYELITKEPIENVNVTSVRGEQGVRKVTLDTGTLKLKTVVVSGLKNVIPILEDIQRGKADFHFMEVMTCPAGCISGGGQPKMLL…	[FeFe] Group A4	[FeFe] Group A4	Evolving	Labile	3	[FeFe]-centre, 2 x [4Fe4S] clusters	FeS protein, FeS protein	0.56441	0.623358	1.02972	0	0	0	0	1.09572	0.459702	0.919119	0	0	0	0	0	0	0	0	0	0	1.36249	0.619207	1.432	8.91307	1.74458	0.537368	0	0	0	0.985006	0.171133	1.8482	0	0	0	0	0	3.09773	0	0	0
WP_013486450.1	MKDSIVIDGRRVELDGEKNLLEVVRKAGIDLPTFCYYSCMSVYGACRMCTVEDSRGRTMAACSTPPKPGMEIRTNTERLRKYRRMILELLLSNHNRDCTTCEKNGSCKLQELALRFGVRKVRFRQEVRDLPLDTSSPAILRDPQKCILCGDCVRMCAEVQGVGALAFAYRGSDMEVTTAFHRSLGDVGCVGCGQCAGVCPTGAITVRDDTARAWKALQDPQTRVVAQIAPAVRVAIGEEFGMEPGEVTLGKLVAAMRMLGFDEVYDTGLGADLTVTEEGNELLDRLQNGGRFPMFTSCCPGWVTYARNRHPELAENISTCRSPMGMFGAVLRDYFSGKDTAEGKKTFSVAVMPCTGKKLEAGWDEMVTEIGKDIDVVLTTQEIAQMIREGGIDFAALES…	[FeFe] Group A3	[FeFe] Group A3	Bifurcating	Labile	3	[FeFe]-centre, 3 x [4Fe4S] clusters, 1 x [2Fe2S] cluster	NADH dehydrogenase, thioredoxin	1.62521	1.14814	1.54457	1.55	1.41309	1.83925	1.43897	0	2.29851	1.83824	0	3.25196	4.12031	0	1.56363	2.15272	0	0.921666	1.51208	1.57458	0.454164	5.6967	7.16001	0	2.24303	2.68684	2.79539	2.77361	1.50927	0	0.5134	0.462051	0	0	3.17617	1.78498	0.867433	0.774432	0.86067	3.80287	2.57266
WP_003534157.1	MVAAIADPKKHVVVQTAPSVRAALGEEFGMPIGTNVEGKMVAALRRLGFDKVFDTDFGADMTIMEEAHEFIDRVQNGGVLPLITSCSPGWIKFCEFYYPELLPNLSSCKSPQQMQGALIKTWYAETHNIDPKDIVSVSVMPCTAKKFEISRDDENAAGVPDVDVVLTVRELARMIKRANIDLTMLPDEKFDPTMDVSTGAAVIFGATGGVMEAALRTAADTLTGKSLDSIDYEEVRGTDGIKEAVYNVAGMDVKVAVASGLSNANEILKKVKNGEADYHFIEIMCCPGGCVNGGGMPIQPSSVRNFVDIRKERAKVLYEEDKNLPLRKSHDNPVVKKCYAEYLGEPGSHKAHEILHTTYTPRPKMK	[FeFe] Group A3	[FeFe] Group A3	Bifurcating	Labile	4	[FeFe]-centre, 2 x [4Fe4S] clusters	NADH dehydrogenase, thioredoxin, thioredoxin	19.2338	16.3973	72.595	33.3249	2.82617	23.9102	12.4711	5.4786	4.13731	13.7868	12.3191	6.50392	7.5539	6.98804	3.12725	0.53818	41.9676	5.52999	4.53625	6.29831	26.3415	35.1709	8.59201	1.78261	14.4551	23.6442	27.9539	71.1892	15.47	19.2076	10.6103	16.1718	3.99965	10.8796	9.52852	1.18998	6.93946	17.0375	9.8977	21.1874	2.57266
WP_006235754.1	MAHRSVIPFGPQHPVLPEPLHLDLVIEDDRVIEAIPQIGFVHRGLEKLTERRDMHQFGYIAERICGICAVGHSYGYASACERMLDIEVPGRAQYIRTILHELSRIHSHLLWLGLLADAFGFEALFYRSWTLREQILKIFESTCGGRVILSINEIGGLKHDIEDSELAGIVQTLDAMRPDYEALVHTFLDDNSCGERLHGVGVISKKDALELSMVGPFGRASGVDYDARMFGDGAYADLAAFEPIVATDGDCYARCQVRCAEVTQAMDIIRELVGKIPHDGIGGRTKLTPADGARGEVVIEQPRGEAYYYVRGNGTKNLDRFRVRTPTSQNLAGLTHALQGVLLANVPMIILTIDPCISCTER	[NiFe] Group 4e	[NiFe] Group 4e	Evolving	Sensitive	6	[NiFe]-centre, 1 x [4Fe4S] clusters	NuoL, NuoH, NuoC, [FeS] protein	13.0543	13.5654	13.9012	0.774999	22.6094	29.8878	9.11346	12.0529	12.8716	4.59559	13.0035	11.3819	0	0	2.08484	0	8.99305	0	0	1.57458	0	7.55432	0	1.78261	2.99071	8.5979	0	0	5.28244	18.2226	4.96286	4.15846	134.388	0	10.5872	11.8998	28.6253	3.09773	55.5132	11.9519	13.5065
WP_015925732.1	MGTMIIDGQHIEFTDEKNILAVIRKVGIELPTFCYHSELSVYGACRMCMVEDKWGSTITSCSTPPKDGMEVWTNTDKLKKHRKMILELLLANHDRDCTTCEKSGRCKLQEIALKVGVKKVRFGQEKKEIPIDDMGPSVIRNPNKCILCGDCVRACQEIQGVGVLDFAYRGSNLQVTTAFNKSLQEVDCVNCGQCRVVCPTGALMIKKDIDRAYKALHDKNKRVIAQIAPAVRVAIGEDFGLQPGEISMGKIVSALRKLGFDQVFDTAVGADLTVIEEAEELMDRIQRKEKLPLFSSCCPAWFKYAEQKHPDLMENVSSCLSPQQMFGAVIKEQYKREKASDEKENVVIAIMPCTAKKYEAARPENTINGERQVDMVITTQELAIMIQENGIVFNELEDE…	[FeFe] Group A3	[FeFe] Group A3	Bifurcating	Labile	3	[FeFe]-centre, 3 x [4Fe4S] clusters, 1 x [2Fe2S] cluster	NADH dehydrogenase, thioredoxin	0.484971	0.153176	0	0.774999	0	0	0	0	0.459702	1.83824	0	0	0	0	1.56363	0	0	0.921666	0	0	0.908327	2.22914	2.864	1.78261	0.249226	0	0.698849	0	0	0	0.342266	0	0	0	2.11745	0	0	1.54886	0	0	0.643165
WP_004052440.1	MYNDENVIKIKHDVLYEVAKLAFDGTLEEKRDEIPEKLIPGPQPQFRCCIYKEREIIRQRVRLAEGKNLRGQGDNVIQVISSACEGCPISSYTVTDNCQNCLGKACMNACKFGAITMGRDRSYIDPSKCKECGQCAKACPYNAIVGVKRPCKVACPVDAITYDEYNVSVIDKEKCIRCGQCIHNCPFGAIGSQTFMIDVIEALKSGKKVYAMIAPASEGQFGADITMQSWKNALKKLGFEDTIEVGLGGDMTAASEADEWAEAYKEGKKMTTSCCPAFVNMVYRHYPELKDHVSTTVSPMCGVSRMIKAKDPDAYTVFVGPCIAKKSEVKDQKIEGNADAVLTYSEIRTIMKVKGIALEPAENEYQESSIFGKRFGNSGGVTEAVLQCLKETNQEMNAK…	[FeFe] Group B	[FeFe] Group B	Evolving	Labile	1	[FeFe]-centre, 3 x [4Fe4S] clusters, 1 x [2Fe2S] cluster	None	12.4704	10.3434	21.1092	7.74999	5.65234	6.43736	3.35759	12.0529	4.59702	0.919119	8.21271	3.25196	21.2883	16.3054	20.8484	33.3672	5.99537	4.1475	7.56041	26.7678	13.6249	16.7186	1.432	12.4783	2.24303	6.44842	18.1701	10.1699	9.05562	17.7301	11.4659	1.8482	7.19937	16.6594	25.4094	24.3947	12.5778	5.42103	3.87301	6.5192	10.2906
WP_025867773.1	METKEVTLQIDRHSITVPVGTTILEAATEIGINIPTLCHIDLKGTCIKNNPASCRICVVEVEGRKNLAPACATKCTEGMTVRTSTLRVMNARKIVAELILSDHPNDCLTCPKSGNCELQNLALRFNVREMPFTGGELSLRKREVTSSIVRNMDKCIFCRRCESVCNDVQTVGALGAVRRGFNTTIAPAFDKKMSESECTYCGQCVAVCPVGALTERDHTNRLLEDLDDPDKVVIVQTAPAVRVALGEEFGLPAGTPVTGKMVYALRELGFNYVFDTDFAADLTIMEEGTEVLDRLTRFLNGDKNVCLPILTSCCPAWVNFFEHHFPDLLNIPSTARSPQQMFGSIAKTYWAEKMGIPREKLVVVSIMPCLAKKYECDREEFKVNGNPDVDYSISTRELA…	[FeFe] Group A3	[FeFe] Group A3	Bifurcating	Labile	2	[FeFe]-centre, 3 x [4Fe4S] clusters, 1 x [2Fe2S] cluster	NADH dehydrogenase	0.401128	0.116482	0	0	0	0	0	0	0	1.83824	0	0	0	0	0	0	0	0	0	0	0	0	0	0	0.996904	0	0	0	0	0	0	0	0	3.05989	0	0	0	0	0	3.80287	0
WP_032508101.1	MSLVNLTINGKHVSAPSGTSILDAAKLINIKIHNLCHLHMNEIDKLDTCASCRVCMVETERGLVPACGTVIKEGMKVQTNSAKALNARRTIVELLLSDHPQDCFVCEKNGDCELQTIAADLGVRKIRYQGSKSFAGKDTSTKSLVKDHSKCILCRRCETVCNDIQTVGALSGVNRGFNTLVSTFFNSDMVETECTFCGQCISVCPTGALTEVDNVPKLWDVLNKKEKTIVVQVAPAVRVAIGEEFGLEPGSISTGKMVAALKALGFEHVFDTNFGADFTIMEEATEFIERIQKGENLPILTSCCPAWVNFLEHNYPDKLNLASSCKSPQGMFGSIAKNYYAPKILGINPEELYVVSVMPCVAKKYEASREELSESGILDVDLSITTRELAKMIKEAAID…	[FeFe] Group A3	[FeFe] Group A3	Bifurcating	Labile	3	[FeFe]-centre, 3 x [4Fe4S] clusters, 1 x [2Fe2S] cluster	NADH dehydrogenase, thioredoxin	2.5442	1.9459	2.05943	2.325	0	0.459812	2.39828	20.8187	0.459702	6.43383	0.684393	3.25196	0.686718	6.98804	0.521209	0	2.99768	0.460833	3.02417	1.57458	3.63331	2.47683	2.864	1.78261	2.24303	3.76158	0	0	3.77317	1.47751	2.0536	0.924102	16.7985	5.4398	0	1.18998	7.8069	6.96989	0.430335	3.80287	0.643165
WP_025868115.1	MAFTNNVMIVRHKLLADLVRLWKKDELIDKIDRVPIELSPKKSKPLGRCCVHKERAVWKYKCLPLMGLDMTDEHDELTNLSEYARQALEREECTKENIFCVIDEACSSCVQINYEITNLCRGCVARSCYMNCPKDAIRFKKNGQAMIDHDTCVSCGICHRSCPYHAIVYIPVPCEEACPVKAISKDENGIEHINEDKCIYCGKCMNACPFGAIFEVSQAFDILQRIRKGEKMVAIVAPSILGQFKTSIEHVYGAFREIGFADVIEVAQGAMDTTSNEAHELLEKLEEGQAFMTTSCCPSYIELVEKHIPELKPYVSATGSPMYYAARIAKAKHPDARIVFVGPCVAKRKEIRRDEAVDFILTFEEIGSILDGMDIQLEQTQPFSLVYTSVREAHGFAQA…	[FeFe] Group B	[FeFe] Group B	Evolving	Labile	1	[FeFe]-centre, 3 x [4Fe4S] clusters, 1 x [2Fe2S] cluster	None	0.43442	0.188223	0	0	1.41309	0	0	0	0	4.59559	0	0	0	0	0	0	0	0	0	0	0	0.123841	0	0	0.498452	0	0	0	0	0	0	0	0	0.339987	0	0	0	0	0	3.2596	0
WP_013931422.1	MTVKVFINGKQYEVPANSTVLEACNLAGVYVPTLCNHPRLEPTGACRVCVVEVEGSRNLQPACATKVADGMRIITRSERVERAVKFNLSLLLSRHPKDCMTCEVNGRCEFQDLIYRYNIKDIFGGEQPLSKVYDDSSPAIIRDLEKCIVCGRCVRACSELQGMDIYSMVDRGFESLPQTAFEMPVYDTDCIACGQCSVFCPVGAITENSQVRKVLEELEKHDKVLIVQTAPATRVALGEEFGLEPGSISTGKMVAALRRLGFDYVFDTNFAADLTIMEEGSEFLERLKNGGPFPMFTSCCPAWINMMEKLYPQFIPNVSSAKSPHQMLGAVVKTYFAKKINVDPKNIFLVSIMPCTAKKDDIIRPQHMINGVPAVDVVLTTRELAKLIKIKKIPFATLP…	[FeFe] Group A1	[FeFe] Group A1	Evolving	Labile	1	[FeFe]-centre, 3 x [4Fe4S] clusters, 1 x [2Fe2S] cluster	None	0.630803	0.284932	0	0	0	1.37943	0	0	0	1.83824	1.36879	0	0	0	0.521209	0	2.99768	2.765	1.51208	0	0	1.73378	1.432	0	0.249226	0.537368	0.698849	0	0	0	0.342266	0	0	0	1.05872	0	0.867433	2.3233	0	0.543267	0
WP_008708834.1	MELVKVTIDGITVEVPSDFTVIEAAAKAGIRIPQLCYHPELSKEGACRVCVVEIVGGRGLGAACVYPVADGMVVHTNTPKVRETRKAVVELLLANHPQDCLFCQKNQDCELQQTAADLGIREVPYKGATRSAVKDESNPSLVRDPNKCILCGRCIRACHERQGLDVYGFVNRGFKTIVEPAFGYGLDKVACTYCGQCAAVCPTAAICERDDTEKVFAALADPKKYTIVQTAPATRVALGEALGLPAGEIVTGKMVAALRRLGFDKVFDTDFSADLTIMEEGHEFLDRVVNGGVLPMITSCSPGWINFIEIKYPDLLPHLSTAKSPQGMFGALAKTYWPETQGIHVEDIYSVSIMPCTAKKAECVRPQLQSNPGIPDVDTVLTTRELARMIKNAGIDFKN…	[FeFe] Group A3	[FeFe] Group A3	Bifurcating	Labile	3	[FeFe]-centre, 3 x [4Fe4S] clusters, 1 x [2Fe2S] cluster	NADH dehydrogenase, thioredoxin	1.1249	0.695282	1.02972	0	11.3047	0.459812	0.479656	0	0.919403	4.59559	0	1.62598	2.74687	0	0.521209	0	0	5.06916	3.02417	0	0	0.371524	1.432	0	1.49536	1.07474	0.698849	2.77361	0.377317	0	1.19793	0	0	0.339987	1.05872	0.594992	0.433716	0	0	0	0
WP_010076791.1	MELIQLTINGRKVEVETGTTILEAAKKLNIEIPTLCHLKLQDGKHVSCTSSCRVCSVEVEGKKNLVAACSTPVAPYMVVKTNTQKVANARKTLVELLLSDHPQDCLKCQKNLKCELQKIASDLNIRQIRYEGERTKTPTDFSSVSITRDVDKCILCRRCVSVCNNIQTIGVLSPVFRGFETIISTAFMEPLAETNCTNCGQCVAVCPTGALRETNDEDRVWDALDDEDKYVIVQTAPAIRAALGEQFGLKPGTNVTGKMVSVLKALGFKKVYDTDFAADLTIMEEANELVNRIKNNKDLPLLTSCCPGWIKFLEHNYGEFLNLPSSCKSPQQMFGAIAKSYLAEKLGVDPKKMVVVSIMPCTAKKFEASRKEMEVDGIRDVDIVLTTRELSSMIRSAGL…	[FeFe] Group A3	[FeFe] Group A3	Bifurcating	Labile	3	[FeFe]-centre, 3 x [4Fe4S] clusters, 1 x [2Fe2S] cluster	NADH dehydrogenase, thioredoxin	0.567313	0.18364	0.514858	0	1.41309	0.919623	0	0	0.919403	0	0	1.62598	0	4.6587	0	0	0	0	0	0	0	1.85762	1.432	1.78261	0.249226	0	0.698849	0	0	0	0.171133	0.462051	0	0	0	0	0	1.54886	5.16402	0	0
WP_028088444.1	MVNLTIDGREITVKENTTIMEAASQNGIPIPKLCYLKGINEIAACRVCVVELEGKEKLITSCNNIAKEGMVIHTNSPKVRRHRRTTVELILSQHDCECVTCSRSGNCSLQTVANDLNIIDIPFKMEIERQPWNKDFPLIRDSSKCIKCMRCVQVCEKVQGLGVWDVEGTGSRTTINVAGHRTIEEADCALCGQCITHCPVGALRVRDDTEDIWDAIADPDKIVVAQVAPAVRTAWGEEFGLSDDEATVGKILDALKRMGVDYAFDTTFSADLTIMEEGTEFLHRFTAGELKERPMFTSCCPGWLRFIKSQYPHLVRQLSTAKSPQQMFGAVMKTYFAEKLGVSPQRIYTVSVMPCVAKKEEKEMEMFYQEYAGHDIDTVITTRELTKMIKSAHISPDTL…	[FeFe] Group A2	[FeFe] Group A2	Evolving	Labile	2	[FeFe]-centre, 3 x [4Fe4S] clusters, 1 x [2Fe2S] cluster	NADH-dependent glutamate synthase	73.6163	62.8412	38.6144	31.7749	9.8916	59.3157	65.2332	56.9775	45.9702	18.3824	77.3364	34.1456	196.401	37.2696	49.5149	51.6653	38.9699	41.475	36.29	111.795	85.8369	33.8087	21.48	69.5219	75.5155	112.847	53.8114	88.7554	33.5812	55.1603	75.2986	285.547	105.591	146.535	71.9932	147.558	149.198	112.293	105.862	59.2161	138.28
WP_026895808.1	MENKSQKEMVNIEIDGTKYSVPNDITVLEAARSVNIEIPSLCYLKEINEIGACRVCVVEIEGMKNLQASCVYPVREGLKIRTNTKKVLKARKSAVKLLLSNHHRECTTCIRNLNCELQNLADSLGIRNIPFTGEVQDYGYHDNNPAITRDYNKCINCRRCEAICSKIQECNVYSPINRGLDTIIAPAFQKDLADVSCIMCGQCIIACPTGSLTEKECINDVWTAIHDPEKHVVVQTAPSIQVTLGEMFGMPIGSFVGGKMVTALKRMGFDKIFATDVTADLTIMEEANELVERVIKNPTHLPLLSSCCPGWVKFAEHFYPEFLPNLSTTKSPHEMCGVLSKTWYAQKYNIPPKKIINVGIMPCTAKKYEAARPEMVSDGFRNVDYVLTTRELGRMIRQS…	[FeFe] Group A3	[FeFe] Group A3	Bifurcating	Labile	3	[FeFe]-centre, 3 x [4Fe4S] clusters, 1 x [2Fe2S] cluster	NADH dehydrogenase, thioredoxin	0.627886	0.308276	0	1.55	1.41309	0	0.479656	2.19144	1.83881	0	1.36879	1.62598	0	0	0	0.53818	0	0.460833	4.53625	0	0	0.743048	0	0	0	0.537368	0	0.924536	1.88659	0	0.342266	0.462051	0	0	0	0	0.433716	5.42103	0	0.543267	0
WP_013907653.1	MKKELSPVVKVDAEKCNNCHKCIAVCPVKFCNKASESAVEINHNMCIGCGACIEVCETGARQWVDDFDAFMKDVKKTNMVAIVAPAVAANFPHNYLRLNGWLKSIGIKAVFDVSFGAELTVKSYVEYLKKKQPNMIIAQPCPAIVTYMQIYQPELLEYLIPVQSPMLHTIIMIKHFYPEYKDFKVAVISPCLAKKREFDETGLGDYNVTFKSIDKYFREKNIQLSSYPEVDFDNPPAERAVLFSSPGGLMRTAERWIPDIKERTRKIEGVTMVYSYLKKLPELVRKGLNPLLVDCLNCELGCNGGPGSLRQHASPDEVEFYIEKRRKEMQERYKARFGNKVSAKKIEKVVNKYWKEGLYDRSYLNLKENNELKMPSERELKKVYETMHKYSEKDLYNCM…	[FeFe] Group C	[FeFe] Group C2	Sensory	Labile	1	[FeFe]-centre, 2 x [4Fe4S] clusters, PAS domain	Fusion with methyl-accepting chemotaxis protein	1.22851	1.07014	1.02972	0	1.41309	0	0.479656	0	1.83881	0	2.05318	0	0	0	2.08484	3.76726	0	4.60833	1.51208	0	2.27082	2.60067	0	3.56523	0.249226	0	2.09655	0	0	1.47751	0	0.924102	0	2.37991	2.11745	1.18998	0	2.3233	0	1.08653	3.21582
WP_005487325.1	MLRAEIDGINLELEENISILDAAKKAKINIPTLCYEEGLSIYGGCRLCVVEIEGEELLKPACATNIKDGMKIQTHSKKVRELRKNLFELIIATHNIDCQLNCLTCSRANNCELKDIAEDIGVSKMRLDPIKRGQSIDNSSYAIIREPEKCISCNRCIRKCEEVQGIGIFTTANRGPETLVTTFKNRGMGNVECTNCGQCILSCPTGALHELYQKDSVLDILNDESKHVVVQTAPAVRVAISEPFSNQAGDISTGQMVTALKRLGFDAVFDTNFAADLTIMEEGTELINRINNNGRLPLFTSCSPGWIKFIEHFYPDYLENLSSAKSPQQMFGAIAKNYYAREEGIDPEDIVVVSIMPCTAKKFESKREEMAGDVDYVLTTRELASIIKSAGIDFLNLEE…	[FeFe] Group A3	[FeFe] Group A3	Bifurcating	Labile	3	[FeFe]-centre, 3 x [4Fe4S] clusters, 1 x [2Fe2S] cluster	NADH dehydrogenase, thioredoxin	0.828648	0.45777	0.514858	0	0	0	0.959312	1.09572	0.459702	0.919119	0	0	1.37344	0	1.04242	0	0	0.460833	0	0	1.36249	0.123841	4.29601	10.6957	1.24613	0.537368	0	0	0.377317	0.492503	0.171133	0	0	0.679975	0	0	0	2.3233	0	1.08653	0
WP_006784034.1	MGVISFSEANCKNCYACVRACPVQSIKIKNEQAIIMEERCIACGLCLKACPKNVKKIETELEKVKQFIKSGQSVVVSLAPTAFGVFKNQGHKLVAALKKLGVSHVEETVVGAEVVTQVYETYQHFHLDKCYITSCCASVNLLIEKHYPKVIPHLIPVITPLMAHARMLKLKYGQDVKVVFVGPCLAKKIEGEEEESISAVLTIQELKQWFNEAGIKLNELEEVPLDDGLVSQRTYPMVGGMSKCFNEKDKKIEIVSVDGIRDCIEVIEGIERGEFKNIFFEMSACHHSCLGGPAIGEECENIFNRKMRIKDYARQTQPLHEMSEGGRLSLINLNRVFKNQYSPIIQPSEKEIELILNNIGKYSSMDELNCGSCGYPTCRQKAIAVYNHMAEPTMCLPYM…	[FeFe] Group C	[FeFe] Group C3	Sensory	Labile	2	[FeFe]-centre, 2 x [4Fe4S] clusters, PAS domain	Phosphatase	0.748299	0.733102	0.514858	0	0	0.919623	0	0	0	4.59559	1.36879	0	0	0	1.04242	0	0	1.3825	1.51208	0	1.36249	0.371524	1.432	0	0.498452	0	0	0.924536	0	0	0.5134	1.8482	1.59986	0	0	0	0	0	0	1.08653	9.00431
WP_004330064.1	MHLLRQVHQQLSVRSDLRNFAGVRRAAAGAIFEISQVFDVLQRLREGEKMVAVVAPAILGQYNAPTEKVYGAIKAIGFEDVIEVAQGAMETIRNEGAELEEKIEEGQAFMTTSCCPSWVELANKHIPEMKPFISSTGSPMYYAARIAKEKHPDAQVVFIGPCVAKRKEARRDECVDFVMTFEEINSIFDGLGIEVATTDPFPIPFVSTRAAHGFAQAGGVMGAVQLFLTDNNRPQVEGIQVSNLNKKNVSLLRAYAKSGKAPAKFIEVMACEGGCITGPSTHNLHDAGKRQFAKELAKR	[FeFe] Group B	[FeFe] Group B	Evolving	Labile	1	[FeFe]-centre, 2 x [4Fe4S] clusters	None	30.0029	25.6191	4.11887	99.1998	29.6748	20.2317	12.9507	16.4358	48.7284	64.3383	16.4254	63.4132	4.12031	4.6587	1.56363	0	101.921	23.0416	1.51208	3.14915	5.90413	63.9021	22.912	1.78261	5.98143	26.3311	39.1355	9.24536	11.3195	4.43253	122.018	0.462051	5.59951	3.39987	1.05872	5.35493	0.433716	20.1352	8.17636	17.9278	8.36114
WP_014184036.1	MDIQLTINDIPVKVPEGTTILDAARTVNIDIPTLCHLKLHEMHYNNNIASCRVCVVEVEGRRNLASSCSTPVTQGMVVKTDSLRAIQARRAMVELLLSDHPKSCLTCAKNINCDLRALAAELGVRAISYAGEESEFEIDHSSSSIVRDPNKCIRCRRCETMCSQVQTVGVYSAVGRGFETVIKTAFNLPLSQTACTFCGQCLAVCPTGALTELDQVDKVWKALNDPDKFVVVQTAPAVRVALGEEFGLEPGTIVTGKMVAALRRLGFDRVFDTDFAADLTIMEEATELVHRIQHGGRLPLLTSCCPAWVKFFEHQFPDLLDIPSTCKSPHQMLGVLTKSYYAKTLGIDPKSITVVSVMPCVAKKYEADRPELSQGTDTADVDIVITTRELARMVREASI…	[FeFe] Group A3	[FeFe] Group A3	Bifurcating	Labile	3	[FeFe]-centre, 3 x [4Fe4S] clusters, 1 x [2Fe2S] cluster	NADH dehydrogenase, thioredoxin	0.748649	0.401991	0	0.774999	2.82617	0	0	0	0	3.67647	0	1.62598	4.80702	0	0.521209	0.53818	0	0.921666	0	0	0	0.619207	1.432	0	1.74458	0	1.3977	0	0.754635	0.492503	0.855666	0.462051	0	0	0	0	0	3.09773	0.430335	0.543267	0
WP_016146243.1	MRGVYTSINEIRRRVYTEIARMAYESDDYAKTMEGLPYQILPGERASYRDSIFLERAIVGERLRLAMGMPVRTAAADKPISDGIEKCLTEEQYYEPPLINIIKFACHACPEKQIVVTEGCQGCLAHPCTQVCPKDAIHIINGRSVIDQEKCIKCGRCQEACPYNAIIKQERPCAKACGVNAIHSDENGCAEINYDKCVSCGMCLVNCPFGAIADKAQIFQVIQAIKKGEKVYAAVAPAFVGQFGPKVTPEKLRAAMKALGFANVIEVAVGADLCATQEAIDFLDHVPEKIPFMATSCCPAWSMMAKQEFPEYKECISMVLTPMVLTGRMIKKRHPEAKIVFIGPCAAKKLEARRRSVRSDIDYVLTFEEMMGLFNAKNIDLESIEAEEALSKASTDGRN…	[FeFe] Group B	[FeFe] Group B	Evolving	Labile	1	[FeFe]-centre, 2 x [4Fe4S] clusters	None	48.7517	44.8856	41.7035	40.2999	42.3926	61.6148	82.9805	43.8288	47.809	48.7133	58.1734	61.7873	140.09	51.2457	42.7391	15.6072	14.9884	74.6549	46.8746	34.6407	33.154	27.8643	10.024	26.7392	14.2059	61.26	34.9424	71.1892	40.373	76.8305	27.8947	52.6738	69.594	54.058	48.7013	41.6495	93.6827	63.5035	75.3086	23.3605	64.3165
WP_026888482.1	MSKYMVIDGNRIEFDREKNILDLVRKAGIDLPTLCYYTDLSVYGACRMCVVEDERGSILTSCSTPPKDMMSIRTNTPKLQKYRKVILELLLATHCRDCTICEKNSKCKLQKLALRFGLTNIRFKSIEGKKDLDTSSKSIIRDPNKCILCGDCVRMCNEIQSVGAIDFAHRGSNMVVSPAFGKSLADTDCVNCGQCATVCPTGAIIIRSDIKNVWKAIYNPKQRVVVQVAPAVRVALGEEFGIKSGENVMGKIAAAMRRLGFENIYDTSLSADLTVIEESKEFLKKLESDDNEFPLFTSCCPAWVRYVENKYPELLPYVSSCKSPMEMFGAVVKAYFKEKDSLEDRETISVAVMPCTAKKAEAAREEFISDNIPDVDYVITTAELCAMIKEIGIQFNEIE…	[FeFe] Group A3	[FeFe] Group A3	Bifurcating	Labile	3	[FeFe]-centre, 3 x [4Fe4S] clusters, 1 x [2Fe2S] cluster	NADH dehydrogenase, thioredoxin	1.64004	1.16028	2.05943	0	7.06543	0.919623	1.43897	0	0.919403	1.83824	0.684393	0	3.43359	0	0.521209	0.53818	5.99537	1.3825	1.51208	0	2.27082	1.98146	2.864	7.13046	4.23684	0.537368	2.09655	0	0.754635	0.492503	1.19793	0.462051	0	0.339987	5.29362	1.78498	0	1.54886	0	4.8894	0
WP_021874508.1	MFQFESQLKKLKHEVLTEVAKLAKADKVTPEEIEKIPYEVIKGDKARYRCCVYKERAIVLERAKLAAGCLANGDNMIEEFVDIQEDDQIIYVIEAACDRCPINKYSVTDSCRNCLAHKCKEACNFGAISYVAGRAYINQEICKECGMCQKACPYDAISEVMRPCKKVCPTAAIEISPEDRRAVIKEEKCVNCGACMSACPFGAISDKSLIVPVAKNLAKGEKVYAVVAPAITGQFGMKTTYGQIKNAIKKLGFIDMVEAACGADAVTVHESNEFIERMENGDNYMTNSCCPGFLSYVEKMFPSEIGKVSGTVSPMVAAGRYIKHMDPEAKVVFIGPCTAKKSEAVRESVKDAVDYVLTFEELLALFDAFEIELEKCEEEIVDDASIYGRGFGAHGGLTA…	[FeFe] Group B	[FeFe] Group B	Evolving	Labile	1	[FeFe]-centre, 3 x [4Fe4S] clusters, 1 x [2Fe2S] cluster	None	0.347007	0.0401427	0	0	0	0	0.479656	4.38288	0	0	0	0	0	2.32935	1.04242	0	0	0	0	0	0	0	0	0	0	0	0	0.924536	0	0	0	0	2.39979	0.339987	0	0	0	1.54886	0	4.34613	0
WP_012662530.1	MKDAIVAIDEALCTGCGRCKEICPVGAVSGTPGQPHKIDQKKCIICGQCVQICSGYESILEEYAIDRATRLEQRGMLDTVQEPLFAAHYRGDVKKLLAALEDEKTVTLVQCAPAVRVALGEEFGLAYGVLTPGKMATSLRRLGFDRVYDTNFAADLTIMEEGAELLARLEKNEGLPMFTSCCPGWVKYLEDHYPDLLPHLSSCKSPQQMGGVLFKTYGAELAGVEPGCVYSVAIMPCTCKKYECDRDGMDSSGFRDVDLVITTRELAQLLKHKGIKFAGLADGEFDQPLGAYSGAGNIFGSTGGVMEAALRSSLELATGVPLDSVELNYLRGGEGFRVAQVEHQGVQLKVGIVAGIQHVAPLLDKIQQGEADFHFIEVMCCPLGCVSGGGQPKTVLPQQ…	[FeFe] Group A4	[FeFe] Group A4	Evolving	Labile	3	[FeFe]-centre, 2 x [4Fe4S] clusters	FeS protein, FeS protein	0.343193	0.0578147	0	0	1.41309	0	0	1.09572	0	0	0	0	0	2.32935	0	0	0	0	0	0	0	0.247683	0	1.78261	0.996904	0	0	0	0.377317	0.492503	1.5402	0.462051	0	0.339987	0	0.594992	0	0	0	0	1.92949
WP_002843191.1	MSFKGIYTAINKVRRDVFTEVAKFAYEDIHDFSKLEQIPYQIIPGEIATHRESIFLERAIVGERIRLAMGLPLRKINEHAALSTGITEETVNNNIYKAPFVNIIKFACNSCPDNEFFTTNTCRGCLARPCVEVCPKNAISMVNGKSFIDQEKCIKCGRCKSSCPYGAIAKLERPCANACGMDAITSDKYGRAKIDYDKCVSCGLCMSSCPFGAISDKTQIYQLIKEMKSGSKVIAEIAPAFAGQFGPKVTPEKLRVAMIELGFFDVVEVAIGADLCTIEEAEDFLSKVPEKLDFMATSCCPAWSVMAKKQFPEFKENISMAMTPMVLSARFIKQAHPDSKVVFIGPCVAKKSEATRKSVKSHVDYVLTFEEVMGMFEAKGINLEEMVPDKEVNYGTGAG…	[FeFe] Group B	[FeFe] Group B	Evolving	Labile	1	[FeFe]-centre, 2 x [4Fe4S] clusters	None	0.682908	0.56929	0.514858	1.55	1.41309	2.75887	2.39828	1.09572	0	0	0.684393	1.62598	0	0	0.521209	0.53818	0	2.765	1.51208	0	0	0.619207	1.432	0	0	0	0	0	0	0	0.684533	0	0.799931	0	0	0	2.16858	0	2.15167	0	0
WP_015358633.1	MSEMVTLTIDGVEVKAPAGSTVLEAAKLAGIRIPTLCYLKGINEIGACRICVVDVGARSLQAACVYPVSEGLKVVTNSPKVREARKVTLELILSNHERTCLTCVRSGNCELQQLANELNVGEIRFDGERTDLPVDDLSPSVVRDPNKCVLCRRCISVCNNVQSVAAIGTAERGFKTVIASPFNMALKDTPCVNCGQCINVCPVGALREKSSIEKVWDALANPDLHVVVQTAPAVRVAIGEEFGLPIGTRCTGKMVAALKRLGFDKVFDTDTGADLTIMEEGNELIQRIKNGGKLPMITSCSPGWIKFCEHNYPDLLDNLSTCKSPQNMFGALLKSYYAEKMGIDPSKIFVVSVMPCTAKKFEIQRPELASTGYPDVDVSITTRELARMIKEAGIDFVNL…	[FeFe] Group A3	[FeFe] Group A3	Bifurcating	Labile	4	[FeFe]-centre, 3 x [4Fe4S] clusters, 1 x [2Fe2S] cluster	NADH dehydrogenase, thioredoxin, thioredoxin	4.11145	3.2742	2.57429	1.55	16.957	7.8168	3.35759	1.09572	5.51642	9.19119	3.42196	9.75588	7.5539	0	3.12725	0	2.99768	1.84333	1.51208	0	1.36249	3.5914	7.16001	3.56523	4.7353	6.44842	2.09655	12.019	6.03708	3.94002	0.342266	1.8482	0	2.03992	5.29362	1.18998	2.6023	1.54886	4.73368	8.149	1.92949
WP_028529172.1	MVTITINGKKMQVEEGTTILKAAAAAGMPVPSLCYLKEINEIGACRVCVVEVKGVARLVTACNNLVQNGMEILTNSPRVRQARRTNVELILSQHNSSCTSCVRGGNCSLQRIANDLGIYASEYTKVIPKKHWPVSFPLIRDSSRCIKCMRCLQICDKVQDLHVWDIAKTGSRATVGVSHNLQITEADCAICGQCLTHCPTGALRERDDTLKLLSAQGAFADPEKVTIVQVAPAVRAAWGEELGLTREEATPKRLVAALKALGFDYVFDTDFGADLTIMEEGSEFLERLNHRDDYKFPMFTSCCPGWVRFLKSQYPEMTGQLSTAKSPHQMQGAVTKTYIAEKFGIDADRIFNISIMPCIAKKQEAEIPNINDSGHGRDVDLVLTTREIARMIRADHLDV…	[FeFe] Group A2	[FeFe] Group A2	Evolving	Labile	2	[FeFe]-centre, 3 x [4Fe4S] clusters, 1 x [2Fe2S] cluster	NADH-dependent glutamate synthase	5.52606	4.72913	3.08915	4.64999	16.957	11.9551	8.63381	3.28716	3.21791	7.35295	4.79075	1.62598	7.5539	2.32935	4.16967	1.07636	0	10.1383	6.04833	3.14915	4.08747	6.31591	10.024	5.34784	4.98452	12.3595	5.59079	4.62268	5.28244	2.46252	5.134	6.93076	2.39979	2.7199	6.35234	3.56995	0.433716	13.1653	1.291	14.1249	3.21582
WP_015739748.1	MADVCLTIDGFSVTVPEGTTILKAARQVGVKIPTLCYLEGINEVGACRICVVEVEGREELVTSCNTPVEEGMVVRTNTPAVREARRMTLELILANHPMECPTCPRNGNCELQNLAQQLNIRTVRIPALPRKELPLDTSTVAIIRDPNKCIVCRRCESVCHNIQTVGAIALQGKGFAATVAPVGGRYLDETNCVQCGQCALVCPVGAIYERDDTDKVWAALADPTKHVVVQTAPAVHVTIGEMFGLPVGTDATGKIVAALRRLGFDAVFDTNFAADLTIMEEGTELLERIEKGGVLPQFTSCSPGWIKFIEHFYPELLPHVSTCKSPQQMFGAIVKTYYAQLKGINPANIVSVSIMPCTAKKFEAARPEMNASGYRDVDVVLTSRELGRMIKEAGIDFAN…	[FeFe] Group A3	[FeFe] Group A3	Bifurcating	Labile	3	[FeFe]-centre, 3 x [4Fe4S] clusters, 1 x [2Fe2S] cluster	NADH dehydrogenase, thioredoxin	0.746915	0.459901	0.514858	0	1.41309	1.37943	0.959312	1.09572	0.919403	3.67647	0	0	0	0	0.521209	0.53818	0	1.3825	1.51208	0	0	0.123841	0	0	1.49536	1.07474	0	1.84907	0.754635	0.985006	0.342266	0.924102	0.799931	0	0	0	1.30115	2.3233	0.86067	0	1.28633
WP_005941255.1	MEEQQITLQIDHHFITVPAGTTLLEAARKIGIDIPTLCHINLKGTCIKNNPASCRICVVEVEGRKNLAPACATRCTDGMVVRTSTLRVMNARKIVAELILSDHPNECLTCPKSGNCELQNLALRFNIREMPFNGGELSPRKREVTSSIVRNMDKCIFCRRCESVCNDVQTVGALGAIRRGFNTTIAPAFDKMMTDSECTYCGQCVAVCPVGALTERDHTNRLIEDLSNPDKIVIVQTAPAVRAALGEEFGLPAGTLVTGKMVYALRELGFNYVFDTDFAADLTIMEEGSEILNRLTRYLNGDRSVRLPILTSCCPAWVNFFEHQFPDMLDIPSTARSPQQMFGSIAKTYWAEKMGIPREKLVVVSIMPCLAKKYECDRDEFKTNGNPDVDYSISTRELA…	[FeFe] Group A3	[FeFe] Group A3	Bifurcating	Labile	2	[FeFe]-centre, 3 x [4Fe4S] clusters, 1 x [2Fe2S] cluster	NADH dehydrogenase	9.48718	14.8175	0	2.325	1.41309	0.919623	0	10.9572	15.6299	0	0	40.6495	52.1906	4.6587	11.4666	0	0	2.30416	0	0	4.54164	47.1835	0	0	1.49536	3.76158	0.698849	1.84907	1.13195	2.95502	1.36907	0.462051	0.799931	0	0	1.78498	0	0	0	12.4951	0.643165
WP_021167212.1	MEMVNLTIDGQQVAVPKTSTVLEAALSIGIKIPTLCYHPELRVEGACRVCMVEVEGARSLVASCVYPVNEGMVVHTNSAAAREARKSVVELLLANHPTDCLSCQRNLNCELQNIAADVGVREIRFDGEKKSYPLDNQNPSLVRDQNKCILCGRCIRACSERQGVHVYSFANRGFNTTVVPAFSLGLDQVACTFCGQCAIVCPTGAIVEKDDTEAVWAALSDPKKHVIVQTAPAVRVALGEALDLPNGSIVTGKMVAALKRLGFDKVFDTNFSADLTIWEEGSELIDRLTNGGTLPMITSCSPGWVNFIELKYPDLLDHLSTAKSPQQMFGAIAKTYYAEKAGIDPKDIVSVSIMPCTAKKAEAARPEMNSSGYQDVDYVLTTRELGRMVRAAGINFAKL…	[FeFe] Group A3	[FeFe] Group A3	Bifurcating	Labile	3	[FeFe]-centre, 3 x [4Fe4S] clusters, 1 x [2Fe2S] cluster	NADH dehydrogenase, thioredoxin	1.26367	0.972405	1.54457	0	4.23926	1.37943	0	0	0.459702	2.75736	4.79075	0	4.12031	0	0.521209	0.53818	0	0.921666	4.53625	0	0	0.371524	0	0	3.98762	1.61211	0.698849	2.77361	0	0.985006	0.684533	0.462051	0.799931	0	2.11745	0	1.30115	3.09773	0	0	0
WP_028044437.1	MRGVYSSVTDIRRKIFTEIARMAYNGDYSVIEELPYKIIPGEVATYRESIFLERAIVGERLRLAMGLPLRPIDQHTILSTGITNSIIAEKYYEPPLINIIKFACHACPDNIVKVTDACQGCLAHPCKEVCPKNAIQIVNGRSVIDQDKCIKCGLCIKNCPYGAIMKMERPCAKACGMDAIKTDEHGHADIDYDKCVSCGMCLVNCPFGAISDKGQIFQLITAMKEGYKVYAAVAPAFVGQLGPKVTPEKLKGAMKTLGFEDTIEVAIGADLCTVEEAEDFLSKVPQEQPFMGTSCCPAWSVMAKKLFPEFKPYISMALTPMVLTARMIKKDHPDCKVVFIGPCAAKKLEASRKSVRSDVDFVLTFEEIMGMFEAKDIHFEDLTEVEQLGEASADGRGFA…	[FeFe] Group B	[FeFe] Group B	Evolving	Labile	1	[FeFe]-centre, 2 x [4Fe4S] clusters	None	54.6158	47.637	42.7332	48.0499	65.0019	77.7082	87.2974	73.4133	57.003	58.8236	54.7514	27.6417	85.8397	46.587	46.9088	9.14906	26.9792	91.2449	48.3867	28.3424	49.5038	32.6941	31.5041	123	44.113	63.9468	39.8344	101.699	47.1647	57.6229	23.6164	54.0599	47.9958	61.8777	80.463	41.0545	99.3211	46.4659	80.4726	40.745	59.8143
WP_028515986.1	MENITVKINGVELEVPKGTTVLEAAHMAGFEIPTLCYMKEINEIGACRICVTEVNEGRGFRLVAGCVYPCSNNMEILTNSPKVIESRKRTLELILSTHDRKCLSCVRSGNCELQKLAKDYGVEDATVYDGVKNEYEVDNSAPHMYRDNNKCILCRRCVAVCAKTQGIGVIGANERGFKTYIGSAFDMGLGETSCVSCGQCIAVCPVGALSEKDYTKEVMAAIADPEKTVLVQTAPAVRAGLGECFGNPIGTNAEGKMVAALRRLGFDKVFDTDFAADLTIMEEANEFLDRFKNGGTLPLITSCSPGWVKFCEHYYPDLLDHLSTCKSPQQMFGATAKTYWAQKMGIDPKNIVMVSIMPCTAKKFEIGRPDQSAAGVPDVDYALTTRELGRMIERAGILF…	[FeFe] Group A3	[FeFe] Group A3	Bifurcating	Labile	3	[FeFe]-centre, 3 x [4Fe4S] clusters, 1 x [2Fe2S] cluster	NADH dehydrogenase, thioredoxin	8.02725	8.00353	8.75259	8.52498	8.47851	24.37	6.23553	0	2.75821	13.7868	8.21271	0	8.92733	2.32935	7.29693	0.53818	8.99305	0.921666	1.51208	0	2.27082	6.81127	5.72801	0	12.7105	5.91105	3.49424	26.8115	3.01854	17.2376	2.567	10.1651	0	8.83967	9.52852	3.56995	7.8069	4.64659	2.58201	15.7547	0.643165
WP_012742086.1	MRLLILSDTIRKIEILFYKEESIMRGVETRIQEIRHKIFTEVARMAYHTEWPVKDRMEALPYKIIPGEKGNFRNDVFLERAIVGERLRLAMGLPYRSAAEHSPISDGIEAADKDETYYTPPLINVIKFACNACPEKRVHVTDGCQGCLAHPCMEVCPKDAVSLDRTTGKSVIDQEKCIKCGRCASVCSYNAIIVQERPCAKACGMDAISSDENGKANIDYDKCVSCGQCLVNCPFGAIADKSQIFQTIRAIQSGEKVYAAVAPAFVGQFGPKVTPGKLRAAMKALGFADVFEVAIGADLCAKQEAEDFLKEVPDELPFMATSCCPAWSVMAKKLFPEHAKCISMALTPMTLTARLIKQHNPDARVVFIGPCAAKKLEAMRRSVRSEVDFVLTFEEMTGI…	[FeFe] Group B	[FeFe] Group B	Evolving	Labile	1	[FeFe]-centre, 2 x [4Fe4S] clusters	None	51.8874	49.1528	109.665	77.4999	11.3047	35.4055	8.63381	32.8716	5.97612	4.59559	16.4254	52.0314	9.61405	11.6467	21.8908	247.563	32.9745	32.7191	27.2175	146.436	86.7453	16.2232	8.59201	65.9567	12.9598	45.139	79.6688	20.3398	36.2225	85.6955	39.874	11.5513	39.1966	75.8172	115.401	108.289	42.5042	9.29319	15.9224	4.34613	34.0877
WP_008369976.1	MNADGNVIKIKHDVLFEVAKLAFAGELEEQRDHLPLKLIPGPTPQFRCCIYKEREIIRQRIRLAEGKAPGPEDDGNIIQVISSACEDCPISSYTVTENCQNCLGKACINACKFGAIEPGHYRSHIDASKCKECGQCAKACPYNAIAHLKRPCKFSCPVDAITYDEHGISIIDKNKCIRCGKCIHSCPFGAIASKTFIVPVINALREGKHIYAMAAPATEGQFGADITMESWRKAMKELGFVDFYDVGLGGDMTAAYEAEEWAEAYKEGQKKVTSCCPAFVNMVRLNYPQLADNISTTVSPMCAISRMIKAQDPEAITVFIGPCLAKKSEVVDQQIEGNADYVLTYSEIRAIMKAKDVELEACPNDNQTASTFGKRFANSGGVTAAVLESLKESDNCIDA…	[FeFe] Group B	[FeFe] Group B	Evolving	Labile	1	[FeFe]-centre, 3 x [4Fe4S] clusters, 1 x [2Fe2S] cluster	None	73.4312	65.8509	116.358	66.6499	28.2617	86.9044	43.6487	69.0304	60.6806	11.0294	42.4324	73.1691	18.5414	69.8804	30.7513	171.141	35.9722	33.6408	39.3142	111.795	121.716	32.5703	47.2561	105.174	25.1718	60.7226	64.2941	48.0759	79.9913	139.378	68.9667	57.7564	71.9937	124.435	141.869	130.303	88.0444	30.2029	47.7672	6.5192	115.77
WP_007049654.1	MKEIFTPIVDIRRKVFKEVALLAYENKEPELEKLAAEIVEEQDNKITNKKREKALILERIRLALGLDVSSNETPFDEDKDKENILGEKNVLNLPLVNVVSKACMQCEENTVFVTNNCRGCYAHPCSEVCPVDAVYFENGKSVINKDKCVRCGRCVEACPYNAIVKFDRPCKASCGVNAYTEDEEGNAKIDYEKCVSCGQCIVACPFGVVSDKSEIYQTIKAIQNNNEVIAEIAPAFVGQFGKGASPEKIKEALLKLGFSDVIEVALGADMGAVFEAKHFIEKVKTGEEPFLATSCCPSWAVMAKRDYPDIAPYVSPALTPMVATARVIKENHPNAKIVFIGPCSAKKLEANRRSVKSDVDYVLTFEEVAGMFEAKGIDVDSFEGEKLDDATAAGRGYGY…	[FeFe] Group B	[FeFe] Group B	Evolving	Labile	1	[FeFe]-centre, 2 x [4Fe4S] clusters	None	2.53718	2.06832	3.08915	1.55	1.41309	4.1383	0.959312	1.09572	3.67761	2.75736	0	1.62598	0.686718	9.31739	0.521209	1.07636	0	2.30416	6.04833	0	3.63331	1.60994	2.864	0	1.24613	2.14947	2.09655	7.39628	3.77317	2.46252	1.71133	2.7723	4.79958	1.69994	1.05872	1.18998	1.73487	3.09773	3.01234	3.2596	3.21582
WP_013788347.1	MFKFNTDVQMLKYEVLYNVAKLTLEDRLEDEYDEIPYEIIPGTKPRFRCCVYKERAIIEQRTKVAMGKNLKRTMKHAVDGEEPIIQVLDIACEECPIKRYRVTEACRGCITHRCTEVCPKGAITIINKKANIDYDKCIECGRCKDACPYNAISDNLRPCIRSCSAKAITMDEELKAAINYEKCTSCGACTVACPFGAITDKSYIVDIIRAIKSGKKVYALVAPAIASQFKDVTVGQIKSALKEFGFVDVIEVALGADFVAMEEAKEFSHKIKDIKVMTSSCCPAFVAHIKKSYPELSQNISTTVSPMTAISKYIKKHDPMAVTVFIGPCTAKKSEVMRDDVKGITDFAMTFEEMVAVLDAAKIDMKEQPDVEVDDATLFGRKFARSGGVLEAVVEAVKE…	[FeFe] Group B	[FeFe] Group B	Evolving	Labile	1	[FeFe]-centre, 3 x [4Fe4S] clusters, 1 x [2Fe2S] cluster	None	0.369396	0.208299	0.514858	0	0	0.459812	0	0	0.459702	0	0	0	0	0	0	0	0	0	0	0	0	0.247683	0	0	0.747678	0	0	0	0	0.985006	0	0	0.799931	2.37991	0	0	0.867433	0.774432	0.430335	0.543267	0
WP_014080018.1	MYADENVIKIKHDVLYEVAKLAFAGELDEKRDNIAMSLIPGPTPQFRCCIYKEREIIRQRVRLAEGKAPGLTDDGNVIQVISSACEDCPISSYIVTENCQNCLGKACINACKFGAIEPGRTRSHIDPTKCKECGRCAQACPYNAIAHLKRPCKFSCPVNAITYDEHGISVIDKKKCIRCGKCIHSCPFGAIGSKSFIVDVINALREGKHVYAMAAPATEGQFGDDITMASWKNAMKELGFTDFFDVGLGGDMTAAYESEEWAEAYKAGEKKVTSCCPAFVNMVRLHYPDLADCVSTTVSPMCAVSRLIKARDPEAITVFIGPCIAKKSEVVDQQIPGNADYVLTYSEIRAIMKAKSVVLQPAANDDQIASTFGKRFANSGGVTAAVLQSLKESEDEIDA…	[FeFe] Group B	[FeFe] Group B	Evolving	Labile	1	[FeFe]-centre, 3 x [4Fe4S] clusters, 1 x [2Fe2S] cluster	None	67.5153	63.0523	140.556	93.7748	62.1758	50.5793	24.4625	46.0203	13.3313	10.1103	35.5884	52.0314	12.3609	34.9402	59.4178	224.959	41.9676	48.3875	87.7008	168.48	67.6704	27.4928	40.0961	89.1307	24.9226	37.0784	65.6918	61.0193	75.0861	75.353	41.9276	47.1292	33.5971	84.3169	150.339	146.963	97.1525	20.9097	30.9841	17.3845	64.3165
WP_010746116.1	MKEVMITINGKICTAPEGSTILEAARINNIEIPTLCFLKEINEIGACRMCVVEVKGARSLVTACVYPISEGMEINTNSKKVFDSRRVTLELILSTHERKCLSCIRSGNCELQKLCKEFNVADEDYFNGENCEYEFDDSAVHMVRNNNKCILCRRCVAACSKWQAVGVIGPNDRGFNTHIGSAYEQNLDDVPCISCGQCIVVCPTGAIHEKDQTQEVWEALEDPTKYVIVQTAPSIRVTLGEAFNMPIGTNVEGKMVAALRQIGFDKVFDTNVAADFTIMEEANEFLERVGNDGPFPMFTSCSPGWVKYLEAYHPELIPNLSTCKSPQQMFGALSKTWYAEKEGIDPKDIFVVGIMPCTAKKFEVTREDQAAAGYSDCDVALTTRELARMIDKAGVRFVE…	[FeFe] Group A3	[FeFe] Group A3	Bifurcating	Labile	3	[FeFe]-centre, 3 x [4Fe4S] clusters, 1 x [2Fe2S] cluster	NADH dehydrogenase, thioredoxin	0.516215	0.962057	0	1.55	0	0.919623	0	0	1.3791	0.919119	2.05318	0	0.686718	0	1.04242	0	0	0	0	0	0	0.619207	0	0	0.996904	0	0	1.84907	0.377317	0	0	0.462051	0	0	3.17617	0	0	0	0.430335	0.543267	0
WP_026894721.1	MRKFENQVQLIKYEVLKEVSKLAFKGTIKEERHKIPKTIIPGPEPRSRCCIYKERAIIEDRVELAMGGNKENKNIIEVLDIACDACPINRFVVTEACRGCLAHRCSEACPVGAIRHVGHKAYIDNNKCVECGRCREACQYNAIADVMRPCREACPVGALSIDKDKKAVIDNEKCIQCGACVYQCPFGAIVDKSFIVEVIDLLNRAKEEDIHVYAAIAPAISSQFYYAKIGQVVNGLKKLGFYDVVEVALGADIVAQHEAEEFKETIEDKGVMTSSCCPAFVSHINKNYPMLKDKVSSSVSPMIAISRLIKNIDDNAKVVFIGPCIAKKMEIKEKDLYGTTDYVITFEELAAMLDGAEIDLEYLEEDSLDNASFYGRVFARSGGLTEAIRHVVGKEKYDI…	[FeFe] Group B	[FeFe] Group B	Evolving	Labile	1	[FeFe]-centre, 3 x [4Fe4S] clusters, 1 x [2Fe2S] cluster	None	0.716484	0.340009	0.514858	0	2.82617	0	0	0	0	0.919119	0	1.62598	1.37344	0	0	0	0	0.921666	1.51208	4.72373	0	0.495365	1.432	0	0	0	0	0	0	0	0	0	0.799931	0	1.05872	1.18998	0	2.3233	0	2.17307	0
WP_006905160.1	MVKNDQNINSLKHHIMEEIARLAWADQLTPENEEKVTYEISPGPKAKYRCCVYKEREIVRERIRLAKGLCPSPNRESNNIIQVIDPACDDCAMQTYTVTDNCRFCLGKACINSCKFGAISEGDLRMHIDPAKCKECGQCAKNCPYEAIVHLTRPCKRACPVGAITFDEYGFCKIDEEKCVSCGHCIHSCPFGAIGSKTYLVQIIKAIKAGKEVIAMCAPATEGQFGEEITMASLRNALKEIGFSDMVEVGLGGDMTAAYEALEWSEARKEGRKMTTSCCPAFIRMLQKHFPDQYKENMSSTVSPMTAVSRYLKATHPGCVTVFIGPCIAKKAESQDTSVPDTADWVISYGEFRALLRSKGVEPKPVDDPYQEASIWGKRFASSGGVANAVIECMKERGE…	[FeFe] Group B	[FeFe] Group B	Evolving	Labile	1	[FeFe]-centre, 3 x [4Fe4S] clusters, 1 x [2Fe2S] cluster	None	0.770597	0.630529	0	2.325	0	0	0.479656	1.09572	3.21791	0	1.36879	0	3.43359	0	1.56363	0	0	0.921666	1.51208	3.14915	0	0.99073	0	0	0.249226	0	1.3977	0.924536	0	0.492503	0.171133	0	0.799931	0	1.05872	0	0.433716	0	0	0.543267	0
WP_006444067.1	MKYMTINNRKVAFEDEKNVLSVIRKSGIDLPTFCYHSELSTYGACRMCVVEDDRGRVFASCSETPREGMVIYTNTPRLQHHRKMILELLLASHCRDCTTCRKNGVCTLQKLAQQLGVSYVRFENNKPQLPLDESSDCIVRDPNKCILCGDCVRTCDEIQGLGVLDFAFRGARMQVMPAFNKDLAKTDCVGCGQCRAVCPTGAITIKQNIRPVWEAVADPDTRVVVQIAPAVRVAVGDKFGIPKGENSLGKLAAALRRMGFDEIYDTNFGADLTVMEESEELLERLDSGENLPLFTSCCPGWVKFCENKYPDLREHISTCRSPQQMFGAVLKEEARMDKEDKRKTVVVSIMPCTAKKAEIHRPEHRTDGEQDVDYVLTTTEVTRMIKEAGIDLAQMPSEA…	[FeFe] Group A3	[FeFe] Group A3	Bifurcating	Labile	3	[FeFe]-centre, 3 x [4Fe4S] clusters, 1 x [2Fe2S] cluster	NADH dehydrogenase, thioredoxin	30.5241	27.4492	37.5846	17.05	28.2617	35.8653	39.8114	15.3401	32.6388	11.9485	10.9503	24.3897	225.243	11.6467	17.7211	17.2218	29.9768	21.1983	34.7779	23.6186	29.0665	32.1987	14.32	71.3046	9.47059	58.0358	36.3401	62.8684	23.3937	36.4452	7.01646	24.9507	15.1987	2.7199	48.7013	36.2945	17.7824	27.1051	31.4144	29.3364	28.9424
WP_027625220.1	MSLVTLTINNKKIQVEQGTTILNAAKTLNINIPTLCHLKLHDKKTENNPGSCRVCVVEVQGRKNLAPACCTPVMDGMVVKTNSIKAIKARRNMVELLLSDHPQECLLCEKNTECELQSLAADMGIKSIKYTGEISKFPKDTSSFSIVRDLDKCILCKRCVTMCNEVQTVEVLSAVDRGFDTVIAPAFSAPMIETNCTFCGQCVAVCPTGALTEVNNTSKVWDALDNKDKVVIVQTAPAIRAALGEEFGLEPGTVVTGKMVSALRALGFNKVFDTDFAADLTIIEEATELIHRLEHGGRLPMLTSCCPGWIKFFEHQFSDLLDIPSTCKSPQQMFGAIAKTYLAEKMGVDPKNLIVVSVMPCLAKKYEAARPEMSNNGVPDVDIVISTRELAKMIKEAGI…	[FeFe] Group A3	[FeFe] Group A3	Bifurcating	Labile	3	[FeFe]-centre, 3 x [4Fe4S] clusters, 1 x [2Fe2S] cluster	NADH dehydrogenase, thioredoxin	0.31134	0.111397	0	0.774999	0	0	0	1.09572	0.459702	0	0.684393	0	0	0	0	0	0	0	0	0	0.454164	0.247683	0	0	0	0.537368	0	0	0	0	0	0.462051	0.799931	0	0	0	0	0	0	0	0
WP_029502581.1	MNVIGFKEAKCKNCYKCVRNCDVKAITVKDAQAYIMNDKCILCGHCLEVCPQNAKTLISDLERVKEYIKEGHQTIISLAPAYLGVLKYNTPGQVISALLKLGFTAVRETAEGAAYVTREYDKLIAAGEMENIITTCCPSLNDLVEIYYPSLTKYLAPVISPMIAHGKIIREEYGPNVKVVFLGPCISKKREAESDPRTVGIIDAVINFKELEEWLLEEGIDILEQPDTPPSNPNPLVNRLYPISSGVLSSVVASRNTSDRYRKFYVHGIKNCIDLLESMNRGEVTGCFIEANICNGGCIKGPAIDRARISRFKVKLDMEESIPKTPIKDEDFYAKFPILLEKHFFDRSPKDPVPTEEEIMQILRKIGKTKTEDMLNCGACGYATCRDKAIAVYQGKAEL…	[FeFe] Group C	[FeFe] Group C3	Sensory	Labile	3	[FeFe]-centre, 2 x [4Fe4S] clusters, PAS domain	Phosphatase, thioredoxin	1.8464	1.46154	0.514858	3.09999	1.41309	6.43736	0	0	0.459702	3.67647	2.73757	0	2.06015	0	0	0	0	0.460833	4.53625	0	0	0.743048	0	0	0.498452	0.537368	1.3977	14.7926	1.13195	1.47751	0.5134	1.8482	0.799931	1.69994	1.05872	3.56995	0.433716	1.54886	0	1.08653	1.92949
WP_012739633.1	MLSNDATIQNIKHEILYEVAKLAYAGRFEEEKDELAYKMFPGPKARFRCCVYKEREIARQRIRLAEGKCPTESDHPGANNIIQVIEAACADCPLSHYIVTDNCRKCMMKACQQACKFGAVSMTRDRAYIDPDKCKECGMCAKACPYNAIADLIRPCKKICPANAITMDENGICEIDENKCIQCGQCIHACPFGAIGSKTDIVDVIKAIVDGKKVVAMVAPAVEGQFGDTITMSSIRTACKKLGFNDMYEVGLGGDLTAQAEAEEWLEAAKEGKKLTTSCCPAFVNLIKKQYPELAEHISTTISPMFALSRLLKSEDPDTITVFIGPCIAKKNEKQEYKGQGNADFVLTLGEFRAMMRAKEVVLEPEENSDQQASIYGKRFGNGGGVSAAVAQCMREAGA…	[FeFe] Group B	[FeFe] Group B	Evolving	Labile	1	[FeFe]-centre, 3 x [4Fe4S] clusters, 1 x [2Fe2S] cluster	None	21.6488	20.3829	6.69316	9.29998	36.7402	5.51774	8.15415	24.1059	38.1552	34.9265	10.9503	11.3819	5.49374	25.6228	36.4846	0.53818	41.9676	50.2308	16.6329	15.7458	9.53744	83.7167	17.184	24.9566	2.49226	3.76158	12.5793	3.69814	6.41439	22.6551	126.125	11.0892	3.19972	1.69994	7.41107	4.16495	1.30115	3.09773	2.15167	3.2596	18.6518
WP_022362192.1	MVNLTINNRPVSVPEGTTILDAAAGIGIMIPHLCYLRDINEIAACRVCQVELQGKEKLITACNNKVEEGMVIFTNSPKVRETRKTIVRLILSQHDCRCAICVRSGNCELQKIANDLGCIENPYNGRIEHNDWNPEFPIIRDNAKCIKCMRCIQVCEKIQTLHVWDVVNTGSRTTVDVANGRKIEHADCAACGQCVTHCPVGALREKDDIGKVLAALNDPETITVVQVAPAVRTAWGEDLGMPGDVATEKRLASVLRHIGFDYVFDTNFSADLTIMEEGNEFIERLKNPDKSRLPMFTSCCPGWVRFVKSQYPEFVDNLSTAKSPQQMFGAVVKSYFAKKADIDPSRICSVSIMPCTAKKAEAAYDNMSSAGYGQDVDYVLTTREFARLVRGEAIIPEAL…	[FeFe] Group A2	[FeFe] Group A2	Evolving	Labile	2	[FeFe]-centre, 3 x [4Fe4S] clusters, 1 x [2Fe2S] cluster	NADH-dependent glutamate synthase	6.15332	5.95142	5.14858	5.42499	7.06543	3.67849	4.79656	4.38288	5.97612	1.83824	3.42196	4.87794	2.74687	0	14.0726	11.3018	20.9838	4.1475	9.0725	1.57458	1.36249	9.41194	15.752	5.34784	10.4675	9.67263	4.19309	6.47175	4.15049	4.92503	18.6535	4.15846	1.59986	3.39987	5.29362	2.97496	2.16858	13.1653	2.15167	11.4086	3.85899
WP_011417004.1	MEEHMSSINLTVNNIDVEVEAGATLYQAAQKAGVNIPTLCAWFDKDHTPGACRVCVVEVEGMPSLAASCAYPAQNGMKVFTNSDKVRQARKMIVELILASHPQECNFCVRNGNCELQKVAEMVGVKNIRYDSEEFDRDRELDTSSPAIVRDSSKCINCRRCVTVCESIQTVAALSPMNRGYESTVSPAFNLPLNETNCVNCGQCVMACPVGALYEKDQVDEVWKALQDPTRHVVVQEAPAIRAALGEEFGMPPGSLVTGKMIAALRRLGFDKVFDTNFTADLTIIEEGNELLKRVKEGGTLPMITSCSPGWIKFCEHFYPDLLGHLSTCKSPQQMFGALAKTYYAQVSGIDPANIFSVSIMPCTAKKYEAQRPEMKSSGYQDVDVVLTTRELARMIKEA…	[FeFe] Group A3	[FeFe] Group A3	Bifurcating	Labile	3	[FeFe]-centre, 3 x [4Fe4S] clusters, 1 x [2Fe2S] cluster	NADH dehydrogenase, thioredoxin	0.509669	0.251188	0.514858	0.774999	1.41309	0.459812	0.959312	1.09572	0	1.83824	0	1.62598	0.686718	0	0.521209	0	0	0.460833	0	0	0	0.371524	0	0	0	0	0	0.924536	2.64122	0	0	0.462051	0	0	0	0	0	0	0.86067	0.543267	0
WP_013708979.1	MADMMRGAYTGLAEIRRMVFREVAKLAYADADDDADYRWVDELPYRIIPGDVATYRESVFLERAVVGERIRLTMGLPLQDVDRPARLSEGVAAAARPETYYQPPLINVIKFACNACEEECYEVTNMCQGCLAHPCREICPTGAVTFVDKKAHIDKDACINCGRCASICPYTAIAHRERPCAAACGMNAIASDEWGRAEIDYDRCVSCGQCLVNCPFGAIADKSQIFQVIQAITTGDEVIAAVAPAFVGQFGGRGNVDKLREAFLRLGFCGMEEVAIGADLCTVQEAEYFVDEVPDKLPFMGTSCCPAWSVMAKREFPEHAQCISMALTPMVLTARLIRERHPDAKIVFVGPCAAKKLEARRTSVKSEVDFVLTFEEMAGMMEAKEIDYRQLSGDGSTDF…	[FeFe] Group B	[FeFe] Group B	Evolving	Labile	1	[FeFe]-centre, 2 x [4Fe4S] clusters	None	2.31043	1.88076	1.02972	3.87499	0	1.83925	5.27622	6.57433	2.29851	0.919119	0.684393	3.25196	0.686718	2.32935	1.56363	0	5.99537	5.06916	1.51208	0	1.36249	1.4861	2.864	3.56523	1.24613	1.61211	0.698849	2.77361	1.88659	5.41753	1.5402	1.8482	0	2.03992	0	1.78498	6.50575	3.87216	4.30335	1.08653	3.85899
WP_008521264.1	MVNIVIDGKSIQVPEKTTILEAAKSVGIKIPTLCYFKGLNEIGACRICVVEVEGYDRLFTACNSPVEEGMVIQTNSRKARETRKANLQFILSEHQDRCPMCVRNGNCELQKTAGDLNVHSTPFKKHIDDRTSNPDFPLIRDYSKCIKCMRCVQVCDKIQHSNVWDVVNSGGTITVDVGKAYRLEDAPCVLCGQCITHCPVGALHERDDTQKLMDAIDDPDKIVLVQIAPAIRTAWCEEFGMKPEEATVNRLASALRIIGFDYVFDTNFSADLTIMEESSEFVERLTHADQFKFPMFTSCCPAWVRFVKANWPKYIPQLSTAKSPQQMFGAIAKSWYPQLLGVDPKRIFSVSVMPCLAKKAECALPTMNSAGAGQDVDLAITNREITRLIRAHQIDPTDL…	[FeFe] Group A3	[FeFe] Group A3	Bifurcating	Labile	1	[FeFe]-centre, 3 x [4Fe4S] clusters, 1 x [2Fe2S] cluster	NADH dehydrogenase, thioredoxin	1.34543	1.30005	0.514858	1.55	1.41309	1.37943	0.959312	1.09572	1.83881	2.75736	0	0	1.37344	2.32935	2.60604	0	2.99768	2.765	1.51208	0	0.454164	1.4861	1.432	0	0.249226	2.68684	0	0.924536	3.01854	0	0.684533	2.7723	0.799931	0.339987	0	0	0.433716	6.19546	0.430335	1.08653	0
WP_004093662.1	MQTFKDLHRKIAEATAGGEPVKSLFDDFDKSELNCLFNPEIHPVFWSLEACLVKAAEAGKKISRDVQSCMESLHGKKKLAYALIAPAFIGQFSEEVTPGMLRNVFKQMGFDGMVEVAVFADILTLKEALEFDKNINTERDYQLTSCCCPMWIAMIRKIYSDLMPHVPATVSPMIAAGRTVKILQPGAVTVFVGPCVAKKAEAKEPDLQGAIDHVLTFQETKELFDLLNVDLTLFAANEKENSSRAGRIYARVGGVSEAVKNTVERLNPNRRIAIKTRQADGVVNCKAMINELMSGQVNANFFEGMGCIGGCVGGPKSIIDKEAAREQVNAYGEKALYPTPIDNPYVIELLHRLGFDTTESLIEDNQFFTRKF	[FeFe] Group B	[FeFe] Group B	Evolving	Labile	1	[FeFe]-centre, 2 x [4Fe4S] clusters	None	0.545006	0.343394	0	0.774999	0	2.75887	0	0	0	0	0	0	0	0	1.04242	0	0	0	1.51208	0	0	0.495365	0	0	0	1.07474	0.698849	1.84907	1.13195	0	0	0.462051	0	0	0	0	0	0.774432	0	1.08653	0
WP_015528256.1	MGIMTIDGQVIEFTDEPNVLSVIRKAGIDIPTLCYHSELSIYGACRLCTVEDDRGKTFASCSEKPRDGMIIYTNTPRLMRYRKLILELLLAAHCRDCTTCIKSGECHLQELAHRMGVHEIRFENVREIQPIDTSSHAIIRDPNKCILCGDCVRMCDNVQNINAIDFAYRGTDAQVIPAFNKKIAETDCVGCGQCRVVCPTGAISIHTNIDEVWEALADKNTKVIAQIAPAVRVAIGDNFGYAKGENVMGKLVGVLHRLGFDEVYDTSYGADLTVVEESKEFIERFTSGEKMPLFTSCCPAWVKYCENKYPEFVPNLSTCRSPQQMFGAVVREYYKDPEKNEGKKIVSVSIMPCTAKKEEILRPESYTNGKQDVDYVLTTTEIVRMIRKSGIVFDKVEIE…	[FeFe] Group A3	[FeFe] Group A3	Bifurcating	Labile	3	[FeFe]-centre, 3 x [4Fe4S] clusters, 1 x [2Fe2S] cluster	NADH dehydrogenase, thioredoxin	46.231	42.9609	2.57429	48.8249	40.9795	15.6336	2.87794	19.723	97.4567	56.0662	55.4358	39.0235	21.975	100.162	35.4422	72.6543	53.9583	25.8066	36.29	144.861	55.408	51.2703	32.9361	58.8263	15.2028	36.5411	55.209	4.62268	48.2966	28.5652	27.2102	7.85486	60.7947	43.8584	22.2332	32.7246	6.50575	19.3608	43.4638	7.60573	86.1841
WP_007560478.1	MAFTNNVMIVRHKLLENLVALWKENQLVEKIDRIPLEISPRRSQPVGRCCIHKERAVTKYKLLPLLGWDMTDETDELTPLSEYARKTLERKERIKENILCVIDEACSSCVQVNYEVSNLCRGCVARSCYMNCPKGAVHFNKKTGQAQIDHDKCISCGICHKSCPYHAIVYIPVPCEEACPVKAISKDEHYIEHIDESKCIYCGKCLNACPFGAIFEISQVFDVLEAIRKGEQVIAIPAPSVLGQFKATIEQVYGALKEIGFADVIEVAEGAMHTTSNEAHELLEKLEEGQKFMTTSCCPSYIELVNKHIPDMKPYVSSTGSPMYYAARIAKKKYPNAKVVFIGPCIAKRKEAQRDECVDYVLTFEELHPMFRGLGIELEQANPYKVAYESVCEAHGFAQ…	[FeFe] Group B	[FeFe] Group B	Evolving	Labile	1	[FeFe]-centre, 3 x [4Fe4S] clusters, 1 x [2Fe2S] cluster	None	14.0675	13.026	4.11887	13.95	12.7178	4.1383	1.91862	105.189	3.21791	10.1103	4.10636	11.3819	10.9875	9.31739	0.521209	1.07636	5.99537	2.765	4.53625	1.57458	1.36249	9.16426	5.72801	3.56523	6.23065	6.98579	3.49424	0	3.39586	1.47751	11.8082	1.8482	0	0	1.05872	1.78498	0.433716	0	0.86067	14.1249	0.643165
WP_018084276.1	MSEYFHSVRLDEEKCKGCTNCIKHCPTEAIRVRKGRARIIEERCIDCGECIRVCPNQAKVAITDDLDSIKKYRYSIALPAPSFYGQFKPELTPEIVHAGLIALGFDSVFPVALAAEAVSRAIRNYLEQQRERPRPLISSACPAVVRLVQVRFPSLLEHIIPLVSPMEIAGRVAREAAHRQTGFGPEEIGVFFLTPCPAKVTEVKQPAGDSSSVDGAISMSVVYGNLLRMMDNLNTASLSPVVSGIGIGWGRAGGENEAIKTGSLLAVDGIHCVISVLEEIERGGLEDIDYLEAQACTGGCIGGCLVPQNPFVARVRMGNLARSRQRVESGHMFPAELDYYCRKSPVPARPALKLADDPALALMRLEEAEKIVAELPGLDCGSCGSPSCRALAEDIVQGY…	[FeFe] Group C	[FeFe] Group C1	Sensory	Labile	2	[FeFe]-centre, 2 x [4Fe4S] clusters, PAS domain	Histidine kinase	0.388497	0.15168	0	0	0	0	0	0	1.83881	0.919119	1.36879	0	1.37344	0	0	0	0	0	0	0	0	1.11457	0	0	2.24303	0	0	0	0.377317	0.985006	0	0	0	0	0	0	0	0	0	2.17307	0
WP_007953234.1	MEMVNITIDGQPVQVAKSATVLEAAQTVGINIPTLCYHPELRTAGKCRVCMVEVEGARSLVASCVYPVNEGMVVRTTTAGVREARRLVVELLLANHPQDCLSCQRNLNCELQTIAADLGIRKGRFEGQRKSYPLDESNPSLVRDQSKCILCGRCVRVCSDRQGMNVYSFANRGFNTTVVPAFNQGLHEVACTFCGQCAAVCPTGAITIKDDTEAVWRELSDPSKHVVVQTAPAVRVALGEALDLPQGTIVTGKMVAALRRLGFDRVFDTNFSADLTIMEEGFELLDRLKNGGKLPMITSCSPGWVNFAELKYPDLLEHLSTAKSPQQMFGALVKTYYAEKAGIDPKDIISVAVMPCTAKKAEAGREEFRSSGYQDVDYVLTTSELAMMIREQGLNFNAL…	[FeFe] Group A3	[FeFe] Group A3	Bifurcating	Labile	3	[FeFe]-centre, 3 x [4Fe4S] clusters, 1 x [2Fe2S] cluster	NADH dehydrogenase, thioredoxin	0.767127	0.613205	1.02972	0.774999	1.41309	0.459812	0	0	0.459702	5.51471	0	0	1.37344	0	1.56363	1.07636	0	1.3825	4.53625	0	0	0.247683	1.432	0	0.498452	1.07474	0	0	0	0	0.855666	0.462051	0	0	0	0	0	1.54886	0	1.6298	0.643165
WP_015943803.1	MKEVTKQQRIRVTVNGRQMEVYGDLTILQALLQEDIHIPHLCYDIRLERSNGNCGLCVVELGEGSEQQDVKACHTPIQEGMIIHTNSPRLEHYRKIRLEQILADHNADCVAPCVMTCPANIDIQSYLSHAGNGNFETAIKVIKERNPFPIVCGRVCPHSCEAQCRRNLIDEPVAINHVKRFIADWDIAHEQPWAPRKKAATGKKIAVVGAGSSGLSAAYYSAIQGHDVTVFERHPRAGGMMRYGIPEYRLPKETLDREIGLIADLGVKIMTNKALGTHIRLEDLHQDFDAVYLAIGSWRATPLQIEGDNLEGVWLGINFLEQVTKGADIKLGEHVVVIGGGNTAIDCARTALRKGAGSVKLVYRRTREEMPAESYEVEEAIHEGVEMYFLTAPHKIVAE…	[FeFe] Group A1	[FeFe] Group A1	Evolving	Labile	1	[FeFe]-centre, 3 x [4Fe4S] clusters, 1 x [2Fe2S] cluster	None	3.97946	7.02685	1.02972	6.19999	7.06543	5.97755	1.91862	2.19144	6.43582	4.59559	2.73757	8.1299	6.86718	0	0	2.15272	0	7.83416	0	1.57458	1.36249	5.32518	4.29601	5.34784	3.73839	4.83632	4.89194	2.77361	4.90513	2.95502	4.79173	2.7723	8.79924	2.7199	5.29362	3.56995	6.93946	4.64659	2.58201	2.71633	1.92949
WP_029460554.1	MSMLTITIDGKTTSVPAGSTILDAARQLDIDIPTLCYLNLEDLRVNNKAASCRICVVEVEGRRNLAPACATPVTDNMVVKTNTLRVLNARRTVLELMLSDHPKDCLVCAKSGECELQTLAERFGIRESPYDGGEMSHYRKDISASIIRDMDKCIMCRRCETMCNVVQTCGVLSGVNRGFTAVVAPAFEMNLADTVCTNCGQCVAVCPTGALVEHDHSWEVVEALANPDKVVIVQTAPAVRAALGEDLGIAPGTSVTGKMAAALRRLGFAHVFDTDFAADLTIMEEGSEFLDRLGKHLAGDQTVKLPILTSCCPGWVKFFEHQFPDMLDVPSTAKSPQQMFGAIAKTYYADLLGISREKLVVVSVMPCLAKKYERARPEFAVDGNPDVDIVITTRELARL…	[FeFe] Group A3	[FeFe] Group A3	Bifurcating	Labile	4	[FeFe]-centre, 3 x [4Fe4S] clusters, 1 x [2Fe2S] cluster	NADH dehydrogenase, thioredoxin, thioredoxin	0.309015	0.108261	1.02972	0	0	1.37943	0	0	0	0	0	0	1.37344	0	0	0	0	0	0	0	0	0.495365	0	0	0	0	0.698849	0.924536	0	0.492503	0.342266	1.38615	0	0	0	0	0	0.774432	0.430335	0.543267	0.643165
WP_012543947.1	MDKVTVTIDGITLEVPSNYTVLQACREAGIDIPTLCYAEVINEIGSCRLCVVEVDGVRNLPASCIYPVQNGMNIRTNTPRVREARRVNLELILSNHDRSCLTCIRNTKCELQDLAERFGITDIEFQGENVNYPLDDASPAIVRNPNKCVLCRRCIAECQEVQNVFAIGAVNRGFDTLVSAPFYVSLNDSPCISCGQCITACPTGALYEKDHIQRVYRALADKRKHVVVQTAPAVRVALGEEFGMPVGSIVTGKMVAALRRLGFEVVFDTDFGADLTIMEEGSELIERLKYGGKLPMITSCSPGWINFCEKYYPDFVENLSTCKSPHMMLGALIKTYYAEKMGWNPEDVYVVSVMPCTAKKVEIERPENMHDGLQDVDAVLTTRELARMIKEAGIDFVNL…	[FeFe] Group A3	[FeFe] Group A3	Bifurcating	Labile	4	[FeFe]-centre, 3 x [4Fe4S] clusters, 1 x [2Fe2S] cluster	NADH dehydrogenase, thioredoxin, thioredoxin	0.637622	3.9176	0	0	0	1.83925	3.35759	0	0	1.83824	0	6.50392	0	0	0	0	0	1.84333	1.51208	0	0.454164	0.619207	0	0	0.996904	0	0	2.77361	0.377317	0	0.171133	0	0	0	0	1.18998	0	0.774432	0	0	0
WP_008753040.1	MRGVETRIQEIRHRIFREVARMAYHTEWPVDKRIEELPYKIIPGEVGNFRNNVFLERAIVGERLRLAMGLPYRSAANHAPLSEGIEQADKAETYYTPPLINIIKFACHGCVEKRVYVTNGCQGCLAHPCAEVCPTGAVKIDKESGFSSINQEKCIKCGRCANVCAYNAIIIQTRPCAASCGMDAISSDENGKADIDYDKCVSCGQCLVNCPFGAISDKSQIFQTIRAIQSGERVYAAIAPAFVGQFGPKVTPGKLRAAMKALGFADVFEVAIGADLCATQEAEDFLTEVPEKLPFMGTSCCPSWALMAKKVFPDQANCISMALTPMTLTARLIKKHHPDGKVVFIGPCSAKKLEAMWTEVRSEVDFVLTFEEMAGIFDAKHIDIENLEEDPNGVNDAST…	[FeFe] Group B	[FeFe] Group B	Evolving	Labile	1	[FeFe]-centre, 2 x [4Fe4S] clusters	None	8.82233	8.31081	1.54457	7.74999	12.7178	3.21868	3.83725	8.76577	5.51642	12.8677	8.21271	9.75588	3.43359	4.6587	11.4666	10.7636	0	7.37333	9.0725	7.87288	17.2582	4.58213	7.16001	16.0435	5.23375	14.5089	14.6758	2.77361	4.15049	18.2226	10.9525	7.39281	5.59951	17.6793	24.3507	11.3049	8.24061	9.29319	3.01234	3.2596	6.43165
WP_013275513.1	MEMVTLTIDGEKVQVPKGTTILEAARKIGKKIPTLCFLKEINEIGACRMCVVEVKGARALQASCVYPVSEGMEVFTNTPAVRESRKITLELLLSDHNLECPTCIRNLNCELQKLAEELGIKSIHFEGEKHRSIYDDFSPSIVRDTSKCVLCRRCVSTCHKVQGVGVISPNHRGFETMVAPVFDMSLADVACVNCGQCILACPVGALKEKDDTDRVWKALADPEKHVIVQIAPAVRVSLGEEFGLGRGAIVTKKIPAALRRMGFDRVFDTDFSADLTIMEEGHEFIERLQHGGKLPLITSCSPGWIKFCEHYYPEFLENLSTCKSPQQMFGAVAKTYYAQKVGIDPSKIFVVSIMPCTAKKYECQRPEMRSSGYQDVDVVLTTRELSRMLKEAGINLAAM…	[FeFe] Group A3	[FeFe] Group A3	Bifurcating	Labile	3	[FeFe]-centre, 3 x [4Fe4S] clusters, 1 x [2Fe2S] cluster	NADH dehydrogenase, thioredoxin	2.01865	1.68008	2.57429	0.774999	7.06543	1.83925	1.91862	3.28716	4.59702	6.43383	2.05318	3.25196	2.74687	0	1.56363	2.6909	0	4.60833	0	0	0	2.22914	1.432	3.56523	0.747678	5.37368	3.49424	3.69814	0	0	0.684533	2.31025	0.799931	0.339987	1.05872	0	0	4.64659	0.86067	3.80287	0
WP_004602330.1	MITNDASLLDLKHKILEEVARLAWKDELNEEGKQKLVYELIPGPLAKYRCCVYKDRELVKQRIRLAEGKNPTPGNDSTNIVQILSPACEECPISSYSVTDNCRKCMGQACKNACKFDAISIGNHRSHIDPTKCRECGKCAQACPYNAIVHLERPCKKACPVGAITYNEYGICIIDEEKCINCGHCIHACPFGAPASKSNLPGIIADIKSDREVFAMCAPATEGQFGPDITMGSIRVACKELGFTDMVEVGLGGDMTAAYESEEWSEAKEAGKKMTTSCCPAFINMLRKHFPELYKNNMSSVVSPMCAISRYLKATHPGCITVFVGPCIAKKSEAADKELVAENADYVLTYGEFRAFLRSKDVELKPCEDRYQESSIFGKRFATSGGVAKAVIECMEERG…	[FeFe] Group B	[FeFe] Group B	Evolving	Labile	1	[FeFe]-centre, 3 x [4Fe4S] clusters, 1 x [2Fe2S] cluster	None	0.701104	0.382602	1.02972	0.774999	1.41309	0	0	2.19144	0.459702	0	0	0	0.686718	2.32935	1.56363	2.15272	0	0	0	0	0.454164	1.4861	2.864	0	0	0.537368	0.698849	0	0.377317	0.492503	0.342266	0	0	0	0	0	0	0	0	0	3.21582
WP_013778946.1	MIFLQQHYHSVTLDVDKCKGCTNCIKGCPTEAIRVRNGKAHILDNKCIDCGECIRICPNSAKYAATDSISRLKEFKFKVALPAPSLFGQFKEGTSTKNIIYALKKIGFDEVYEVPLAAEEVTIAIREYISTHKDVRPLISSSCPAVMRLIQVRFPELIKNIIPIKSPMEIAARRAKEILNKEFGYKAEEIGVFFISPCPAKATSVRQPIGSDKSYVDGVISISGIFGDIVKNLDGEEFESIFNSSSGLGIGWGRAGGENLAIGGDNYLAVDGIHNCIEVLEEVEMNKLFDIDYIECQACIGGCIGGALTVESQYIARVKIRRLSEKLGSNSPINKNEVVEQFKNGYFNLEGKILPKSSLKLDDDLVEAIRKMELLEKTVKDLPGLDCGSCGSPNCRALA…	[FeFe] Group C	[FeFe] Group C1	Sensory	Labile	2	[FeFe]-centre, 2 x [4Fe4S] clusters, PAS domain	Histidine kinase	0.485951	0.308125	3.08915	0.774999	1.41309	2.29906	0	0	0.459702	0	0.684393	0	1.37344	0	1.04242	0	0	0	0	1.57458	0	0.495365	0	0	0.498452	0	0	3.69814	0	0	0	0	0	0	0	0	0	0	0	1.08653	0
WP_027202830.1	MLYDNFAMLTKRELLIRIVKLLKEENLVDGVKYIPVEMRPKNKRPIKCCVHKDRYILKHKIISILGFEITDEEIDLIPLSEFAQKALDNKNTKENILSVVHEACSACMQSQYFVTNMCRGCEGRPCLMNCPKAAISFKGGKACITQEDCVGCGLCSKVCPYHAIVYTPVPCEDVCPVKAITKGEDGTEHIDKDKCIYCGKCMQTCPYGAIMERSKVIDVYKSITAPDKKIIAIPAPAIYGQFNATPGQILSAIKAIGFDDVVEVALGAEDTSRNEAAEFLERMEEGKPFMTTSCCPAYVGWVDKHAPMVKPFVSDTRSPMVYAARRVKEQYPDAEVVFIGPCLAKRYEAEMYVPEVDYVMSFEELGAFMVAYDINPETCEELPLDPEVTKFARGYAQAG…	[FeFe] Group B	[FeFe] Group B	Evolving	Labile	1	[FeFe]-centre, 3 x [4Fe4S] clusters, 1 x [2Fe2S] cluster	None	1.1305	0.740541	0	0	0	0.459812	0.959312	0	2.29851	2.75736	0	6.50392	0	0	2.08484	0	0	0.460833	0	0	0	2.97219	0	0	1.24613	1.61211	0	0.924536	0.377317	0	0	0	0	0	4.2349	0	0	0	0	0	0
WP_005600915.1	MLADKNILHFKHEILYQVARLAFEGNLEEGRDALPYELVKGPKPQFYCCIYKEREIIRQRIRLAEGKAPGAYDDGNIIQVITAACEDCPISSYTVTDNCQNCPGKACINACKFGAISTGEHHSKIDGSKCKECGMCAKACPYNAIAHLKRPCKFSCPVDAITYDEYGISVIDEKKCIRCGQCIHKCPFGAIGSKTFIVDVINAIKSDRPVYAMVAPAAEGQFGKDITMASWRDAMKEVGFTDMFEVGAGADMTTMSEAEEWAEAYEKGEKKTTSCCPSFVNMIKNFYPELSDKVSETVSPMCMLSRAIKAKYPEAVTVFIGPCIAKKSEIVDQKIEGNADYALAFSEIRAIMKAKNVVLKPSDNTYQGASVFGKKYANVGGVSSSVLEYMKETGKEISP…	[FeFe] Group B	[FeFe] Group B	Evolving	Labile	1	[FeFe]-centre, 3 x [4Fe4S] clusters, 1 x [2Fe2S] cluster	None	30.7862	32.0221	38.6144	23.25	12.7178	17.4728	19.1862	23.0101	13.3313	6.43383	19.8474	47.1534	9.61405	13.9761	61.5027	69.4252	44.9653	18.8941	37.8021	77.1542	45.8705	14.861	31.5041	41.0001	10.2183	22.0321	26.5563	37.906	38.4864	33.4902	21.9051	30.0333	6.39944	57.7978	55.0536	45.8144	35.9985	26.3307	15.4921	26.0768	18.0086
WP_023973103.1	MSKYMVIDGNRIEFDKEKNILDLVRKAGIDLPTLCYYTDLSVYGACRMCVVEDERGSILTSCSTPPKDMMSIRTNTPKLQKYRKVILELLLATHCRDCTICEKNGKCKLQKLASRFGLTNIRFKSIEGKKDLDTSSKSIIRDPNKCILCGDCVRMCNEIQSVGAIDFANRGSNMVVSPAFGKSLAETDCVNCGQCATVCPTGAIVVKSDIKNVWKAIYNHKQRVVAQVAPAVRVALGEEFGIKPGENVMGKIVAAMRKLGFENIYDTSLSADLTVIEESKEFLKKLESDDNKFPLFTSCCPAWVRYVENKYPELLPYVSSCKSPMEMFGSVVKAYFKEKDSLENRETISVAVMPCTAKKAEAAREEFIRDNIPDVDYVITTAELCAMIKEIGIQFDEIE…	[FeFe] Group A3	[FeFe] Group A3	Bifurcating	Labile	3	[FeFe]-centre, 2 x [4Fe4S] clusters	NADH dehydrogenase, thioredoxin	2.06894	1.71734	2.57429	2.325	1.41309	3.21868	2.39828	0	3.21791	3.67647	1.36879	0	1.37344	0	5.7333	7.53452	0	5.99083	3.02417	1.57458	2.27082	3.83908	5.72801	0	2.49226	1.07474	5.59079	0	2.64122	0	2.567	2.31025	0	0.339987	6.35234	1.18998	1.30115	0.774432	0.430335	2.17307	0
WP_012862886.1	MDEIKDADQIKNEVLQKTAEYAFKNILAEKAEDIPFEIISGIKPQFRCCVYREREIIRQRVRLSMGQLPRDAVYTELEPTQVVHVIPCACEGCPIVRFTVTDNCQNCLTKKCIKSCAFGAISATKKGAYIDKQLCKKCGKCVASCPYHAIVDIERPCKKSCPVDAIEIDENDIAIIDSTKCINCGLCINNCPFGAISDVSMMTNVINTLLTNDNVYAMIAPAIEGQFGPDASIGVIKNWIKKLGFKDVYEVALGADAVAYREAEELSENFKNGKKMTSSCCPSFVNLISKYYGNLVENISTTISPMVATARLIREKDPEAVTVFIGPCVTKKNEALSLYIKEVNYVITFEELAAMFAGKNIDLSAGECDENSATSYGKGFAKSGGVAAAVLKVLEEKGI…	[FeFe] Group B	[FeFe] Group B	Evolving	Labile	1	[FeFe]-centre, 3 x [4Fe4S] clusters, 1 x [2Fe2S] cluster	None	1.35571	0.435299	0.514858	0	1.41309	0.459812	0.479656	3.28716	0.459702	0	4.79075	0	0.686718	2.32935	0	0	0	0	4.53625	0	0	0.123841	0	0	2.24303	1.61211	0	1.84907	0.377317	0	0	0	0	0	0	0	0	0	0	0.543267	0
WP_018085930.1	MSTGKVIIDGREMPIDGAKNILELVRRAGIELPTFCYHSELSVYGACRLCLVEVERMGLVASCSTPPADGMVIHTNTERTRRLRRMVIELLLANHDRECTTCEKSGRCKLQELAHKFGVKKVRFGNRDQKLPLDESSPSIVKDPNKCILCGDCVRMCKEVQGIGVWDFAHRGSKTVVTTAFDKPVSEVACVNCGQCVAVCPTGALTVKSEIDKVWAYLHDPSKVVVVQVAPAVRVAIGEEFGVKTHDMATGKMVTALRKLGFDKVFDTLFTADLTTIEESLEFLDRLQNGGKLPLFTSCCPGWIKYAEQFHADLLDNLSSCRSPQQMFGSLVKKHYAKSIGRAPQDVICVSIMPCTAKKFEAKRPEFMTGGVYDVDVVLTTVELARMIKEAGIVFEELE…	[FeFe] Group A3	[FeFe] Group A3	Bifurcating	Labile	3	[FeFe]-centre, 3 x [4Fe4S] clusters, 2 x [2Fe2S] cluster	NADH dehydrogenase, thioredoxin	0.457833	0.219064	1.02972	0.774999	1.41309	0.919623	0.479656	0	1.83881	0	0	0	2.06015	0	0	0	0	0	0	0	0	0.866889	0	0	0.498452	0.537368	0	0	0.754635	0	0.171133	0	0	0.339987	1.05872	0.594992	0.867433	0	1.291	1.6298	0
WP_006876820.1	MEKEMVNIKINGMPFSVPKDSTILEAARYAGIQIPTLCYLKEINAIGACRICVVEVKGARSLVAACVYPVAEGMEIITNSKKVQQARKITLELILSTHKKECLSCVRSGNCELQKLCHDFKVDDEHRYDGNNPEWPKDDSAVHMVRDDNKCILCRRCVAACAKWQGIGVIGPNERGFNTHIACAFEQNLDEVACVSCGQCIVVCPTGAIYEKDQTDEVWAALNDPSKHVVVQTAPSIRATLGEAFGMPVGTNVTGKMVAALRRIGFEKVFDTDLAADMTIVEEAHEFVERVKNGGVLPMITSCSPGWIKYCEHYHPDMIPNLSTCKSPQQMFGATVKTWYAEKMGWDKKDIVVVGVMPCTAKKFEVRRDDEDAAGSGIPDVDIALTTREIARMIDRAGI…	[FeFe] Group A3	[FeFe] Group A3	Bifurcating	Labile	3	[FeFe]-centre, 3 x [4Fe4S] clusters, 1 x [2Fe2S] cluster	NADH dehydrogenase, thioredoxin	10.7842	10.1092	20.5943	14.725	14.1309	21.1513	3.83725	4.38288	10.5731	30.3309	21.2162	9.75588	8.92733	4.6587	5.21209	0.53818	5.99537	4.60833	4.53625	3.14915	6.35829	9.41194	7.16001	3.56523	17.9443	9.67263	2.79539	47.1513	6.03708	17.2376	2.22473	4.62051	0.799931	1.01996	6.35234	10.7099	5.2046	4.64659	9.46737	24.447	1.28633
WP_004114746.1	MSEEKIGQHYLAALHQAFPGVVLDEAWQTKDQLTVTVKVNYLPEVVEFLYYKQGGWLSVLFGNDERKLNGHYAVYYVLSMEQGTKCWITVRVEVDANKPEYPSVTPRVPAAVWGEREVRDMYGLVPVGLPDERRLVLPDDWPDELYPLRKDSMDYRQRPAPTTDAETYEFINELGNKKNNVVPIGPLHVTSDEPGHFRLFVDGENIIDADYRLFYVHRGMEKLAETRMGYNEVTFLSDRVCGICGFAHSTAYTTSVENAMGIVVPERAQMIRAILLEVERLHSHLLNLGLACHFTGFDSGFMQFFRVRETSMKMAEILTGARKTYGLNLIGGIRRDLLKEDMIQTRQLAQQMRRDVQELVDMLLSTPNMEQRTVGIGRLDPQIARDFSNVGPMVRASGH…	[NiFe] Group 4a	[NiFe] Group 4a	Evolving	Sensitive	6 or 9	[NiFe]-centre, 1 x [4Fe4S] clusters	NuoL, NuoH, two [FeS] proteins, (three antiporter subunits)	0	7.23119	0	0	0	0	0	0	0	0	0	0	0	0	0	0	0	0	0	0	0	0	0	0	0	0	0	0	0	0	0	0	0	0	0	0	0	0	0	0	0
WP_007370867.1	MKMQFPGAVLEEERQTFEQVTITVKINLLPEIVHYLYYQHDGWLPVLFGNDERSLNGHYAVYYALSMEGAEKCWIVVKALVDANTREFPSVTPRVPAAVWGEREIRDMYGLIPVGLPDQRRLVLPDDWPDDLHPLRKDTMDYRLRPEPTSDTENYTFINDGGNSARIVPIGPLHITSDEPGHFRLFVDGERIVDADYRLFYVHRGMEKLAETRMGYNEVTFLSDRVCGICGFAHSVAYTTSVENALGIVVPQRAHTIRSVLLEVERLHSHLLNIGLSSHFVGFDTGFMQFFRIREKSMTMAELLTGSRKTYGLNLIGGIRRDILKEQRVKTIQLVKEMRAEVTQLVDMLLSTPNMAQRTQGVGILDRQVARDFSPVGPLIRGSGFARDLRFDHPYADYG…	[NiFe] Group 4a	[NiFe] Group 4a	Evolving	Sensitive	6 or 9	[NiFe]-centre, 1 x [4Fe4S] clusters	NuoL, NuoH, two [FeS] proteins, (three antiporter subunits)	0	15.4878	0	0	0	0	0	0	0	0	0	0	0	0	0	0	0	0	0	0	0	0	0	0	0	0	0	0	0	0	0	0	0	0	0	0	0	0	0	0	0
WP_011092818.1	MSQRITIDPVTRIEGHLRIDCEIEDGKVVKAWSSGTMWRGMEEIVKGNDPRDAWMIVQRICGVCTTIHALASVRAVENALGMEVPINAQYIRNIIAAAHSIHDHIVHFYQLSALDWVDVTSALQADPKKAADLLKGLSNWPLNSEAEFAQVQQKIKNLVGSGQLGIFANGYWGHPAMSLPPEINLIAVAHYLQALECQRDANRIVAILGGKTPHIQNLAVGGVANPINLDSPGVLNLERLMYLKSFIDRLGDFIEQVYLVDTAVIAAHYPEWFTMGRGADCYLCVPELPVDRKSETFLMPGGFLDNGKFRPINNPHDEYLLKGIEESGKHAWYQDDQPLAPWEGLTRPNYTGWQDDGKYSWVKSPTFYGNAVEMGPLAWLLCNLRAGYQPAQHYFTRAN…	[NiFe] Group 1c	[NiFe] Group 1c	Anaerobic Uptake	Sensitive	4	[NiFe]-centre, 2 x [4Fe4S] clusters, 1 x [3Fe4S] cluster	[FeS] protein, TM subunit	0	3.18866	0	0	0	0	0	0	0	0	0	0	0	0	0	0	0	0	0	0	0	0	0	0	0	0	0	0	0	0	0	0	0	0	0	0	0	0	0	0	0
WP_011405926.1	MVELTLEPVTRIEGHAKITVDLDEEGNVKDTKLHVMEFRGFEKFLQGRPIEEVPRIVPRICGICDVQHHLAAAKACDQVFGYNDDEILPAAYKMREIMNWASVMHSHTLSFYFLSAPDFIGGKDRKTRNVFQIIKDAPELAKKALALRRNSQDIVTAIGGRPIHQVSNTPGGITTELTDEEQKDNLVKAQEALELSLDTWDAAQPIFEENMDLIKTLGNVETYHCGLVDKKDGSWDMYNGNVRMTDKKGDIYAEFGSQDYTDYMAEGVKPYSWLKFPYIKELGYPEGIYRVAPLSRINVCTKMPDAAERAQDYLNEFRKDFGYAQEPLLFHPARLIELVAASELAVDGLEGDLSGEKRPGAIDRSQITGKGVGIVEASRGTLTHHYETDENGLVTKANI…	[NiFe] Group 3c	[NiFe] Group 3c	Bifurcating	Sensitive	4	[NiFe]-centre, 3 x [4Fe4S] clusters	Polyferredoxin, [FeS] protein	0.185636	0	0	0	0	0	0	0	0	0	0	0	0	0	0	0	0	0	0	0	0	0	0	0	0	10.21	0	0	0	0	0	0	0	0	0	0	0	0	0	0	0
WP_011991841.1	MRGDKFIEILRTKVKILEVTRQADDQVTVLVERNDLPLAVKTLYYDIGGFISTMIPNDEREINGCFALYYALSMEGSKMTADDDFAPEDKCFITVKTLIPGVDPTFPSVTPLVPACVWYEREAFDMFGLVAEGLPDRRRLVLSDDWPDGLHPLRKDAMDYRYRPDPVDHRDEPDSEFLFPTGDAVVDVPLGPLHVTSDEPGHFRLFCDGDEIIDADYRLFYQHRGMEKLAENRMNYDQMGYLAERVCGICGYAHAIACIEAAEKAIKLEIPLRAQAIRVICLEIERLHSHLLNIGLACEVTGNYNAFMHIFRVREYSMELAQLVTGGRKTYGNVIMGGLRRDMTNHEIKKGIEIINKLDVQISEIWDAVMEDKRQIGRWRGVGILDRNIARDFSPVGPN…	[NiFe] Group 4a	[NiFe] Group 4a	Evolving	Sensitive	6 or 9	[NiFe]-centre, 1 x [4Fe4S] clusters	NuoL, NuoH, two [FeS] proteins, (three antiporter subunits)	0	2.73313	0	0	0	0	0	0	0	0	0	0	0	0	0	0	0	0	0	0	0	0	0	0	0	0	0	0	0	0	0	0	0	0	0	0	0	0	0	0	0
WP_012134832.1	MSEEKLGQQYLAALHQAFPGVVLDEAWQTKDQLTLTVKVNYLPEVVEFLYYKQGGWLSVLFGNDERQLCGHYAVYYVLSMEQGTKCWITVRVEVDANKLEFPSVTPRVPAAVWGEREVRDMYGLIPVGLPDERRLVLPDDWPDELYPLRKDSMDYRQRPAPTTDAETYEFINELGDKKNNVVPIGPLHVTSDEPGHFRLFVDGENIIDADYRLFYVHRGMEKLAETRMGYNEVTFLSDRVCGICGFAHSTAYTTSVENAMGIVVPERAQMIRAILLEVERLHSHLLNLGLACHFTGFDSGFMQFFRVRETSMKMAEILTGARKTYGLNLIGGIRRDLLKEDMIQTRQLAQQMRREVQELVDMLLSTPNMEQRTVGIGRLDPEIARDFSNVGPMVRASGH…	[NiFe] Group 4a	[NiFe] Group 4a	Evolving	Sensitive	6 or 9	[NiFe]-centre, 1 x [4Fe4S] clusters	NuoL, NuoH, two [FeS] proteins, (three antiporter subunits)	0	3.6156	0	0	0	0	0	0	0	0	0	0	0	0	0	0	0	0	0	0	0	0	0	0	0	0	0	0	0	0	0	0	0	0	0	0	0	0	0	0	0
WP_015279763.1	MSTRIVVDPVTRIEGHLRIEAELSGDTIAEAYSSGTMVRGIETILRGRDPRDAWAFAQRICGVCTLVHGIASVRAVEDALGYEIPANAQLIRNLMIGAQYVHDHVMHFYHLHALDWVDIVSALEADPKQTSALAQSISNYAKSSPGYFADVQKRLKGFVEGGQLGIFANGYWGHPGYRLPAEANLMAVAHYLEALAWQREVAELHAIFGGKNPHPNLCVGGMPCAISLESGKQAGTAVDVVGLERIRSLIAQMREFVHQVYVPDTLAIAGFYKDWFRRGEGIGNFLCYGDLPGTDVGDPGSYLLPAGVILDRDLSHIEPVDLDAEAEIEEFVARSWYAYEDGDDAGLHPYRGETAFAYTGPEPPYEQLDVANQYSWLKSPRWRGRPMEVGPLARILMLY…	[NiFe] Group 1e	[NiFe] Group 1e	Anaerobic Uptake	Sensitive	4	[NiFe]-centre, 2 x [4Fe4S] clusters, 1 x [3Fe4S] cluster	Cytochrome b, [FeS] protein	0	3.6156	0	0	0	0	0	0	0	0	0	0	0	0	0	0	0	0	0	0	0	0	0	0	0	0	0	0	0	0	0	0	0	0	0	0	0	0	0	0	0
WP_020041893.1	MVVQTPNGYTLDNGGKRVVIDPVTRIEGHMRCEVNVNDDNIITNAVSTGTMWRGLEVILKGRDPRDAWAFTERICGVCTGTHALTSVRAVEDALGIQIPENANSIRNIMQLNLEIHDHVVHFYHLHALDWVNPVNALKADPKATSELQQAVSPSHPLSSPGYFRDVQNRLKKFVESGQLGLFKNGYWDNPAYLLPPEADLMATTHYLEALDLQKEIVKVHTIFGGKNPHPNWLVGGVPCPINIDGVGGVGAINMERLNLVSSIIDKCIEFNKNVYLPDVKAIGGFYRNWLYGGGLSSQACLAYGDIPENANDYSAGNMHLPRGAVVNGDLSTVYDVDQRDPEQIQEFVDHSWYTYGAPGKGLHPWDGVTEANYELGPNAKGTRTNIEELDEAAKYSWIK…	[NiFe] Group 1d	[NiFe] Group 1d	Aerobic Uptake	Tolerant	3	[NiFe]-centre, 1 x [4Fe3S] cluster, 1 x [3Fe4S] cluster, 1 x [4Fe4S] cluster	Cytochrome b	0	0.238672	0	0	0	0	0	0	0	0	0	0	0	0	0	0	0	0	0	0	0	0	0	0	0	0	0	0	0	0	0	0	0	0	0	0	0	0	0	0	0
WP_023342092.1	MSEEKIGQHYLAALHQAFPGVVLDEAWQTKDQLTITVKVNYLPEVVAFLYYQQGGWLSVLFGNDERKLNGHYAVYYVLSMEQGTKCWITVRVEVDANKPEYPSVTPRVPAAVWGEREVRDMYGLVPVGLPDERRLVLPDDWPDELYPLRKDSMDYRQRPAPTTDAETYEFINELGSKKNNVVPIGPLHVTSDEPGHFRLFVDGENIIDADYRLFYVHRGMEKLAETRMGYNEVTFLSDRVCGICGFAHSTAYTTSVENAMGIVVPERAQMIRAILLEVERLHSHLLNLGLACHFTGFDSGFMQFFRVRETSMKMAEILTGARKTYGLNLIGGIRRDLLKEDMIQTRQLAQQMRRDVQELVDMLLSTPNMEQRTVGIGRLDPEIARDFSNVGPMVRASGH…	[NiFe] Group 4a	[NiFe] Group 4a	Evolving	Sensitive	6 or 9	[NiFe]-centre, 1 x [4Fe4S] clusters	NuoL, NuoH, two [FeS] proteins, (three antiporter subunits)	0	7.23119	0	0	0	0	0	0	0	0	0	0	0	0	0	0	0	0	0	0	0	0	0	0	0	0	0	0	0	0	0	0	0	0	0	0	0	0	0	0	0
WP_026762838.1	MKHVVVDPITRIEGHLRVEIQVDEATGKVQDAISSGTAWRGLELVMHDRDPRDAWAYIQRICGVCTSSHALGCLRAVEDAFGITIPKNAHYIRNIIAASLGEHDHIVHFYHLHALDWVSPIEALKADPAATAALQNTVLDTYRLPFRGPAGLDTEAYPHDMPVATPSYYAALKAKIQKIVESGQLGIFSAQWWDHPDFQMLPPEVHLMAISHYLEMLDKQKDLVIPHVVFGGKNPHPHYVLGGMPCSISMEDGNAPINAARLAIVDRSINAARDMMNDYYLPDVLAIGAMYVKQGYTHGGGLAKKRCLAFGMFPEEPFSGATNGDFFKNLLVRCNGVVEDFAGGVMQAKVHEFTMEDVSDPAGIAESVDHAWYKYPNGDKNALHPWEGVTEPNYTEPKE…	[NiFe] Group 1d	[NiFe] Group 1d	Aerobic Uptake	Tolerant	3	[NiFe]-centre, 1 x [4Fe3S] cluster, 1 x [3Fe4S] cluster, 1 x [4Fe4S] cluster	Cytochrome b	0	0.804294	0	0	0	0	0	0	0	0	0	0	0	0	0	0	0	0	0	0	0	0	0	0	0	0	0	0	0	0	0	0	0	0	0	0	0	0	0	0	0
WP_006859957.1	MRGVETRIREIRHRIFREVARMAYHTEWSVEKRIEELPYEIIPGEVGNFRNDVFLERAIVGERLRLAMGLPYRSAAEHAPLSDNISAADKAETYYTPPLINIIKFACNACHEKRVFVTDGCRGCLAHPCVEVCPKGAVTLERTNGRSVIDQDKCIKCGRCADVCSYHAIIVQERPCAAACGMDAIHTDANGKADIDYEKCVSCGMCLVNCPFGAIADKSQIFQVIRAIQTGERVYAAVAPAFVGQFGPKVTPGRLRAAMKELGFADVFEVAIGADICAVQEAEDFVNEVPEKLPFMATSCCPAWSTMAKKLFPKHANCVSMALTPMTLTARLIKNQNERAKVVFIGPCAAKKLEAMRSDIRSDVDFVLTFEEMAGIFDAKHIDIETIPEDPEGVNDAST…	[FeFe] Group B	[FeFe] Group B	Evolving	Labile	1	[FeFe]-centre, 2 x [4Fe4S] clusters	None	30.4738	28.4717	22.1389	20.925	19.7832	22.5308	15.8286	17.5315	18.3881	19.3015	19.8474	27.6417	70.7319	41.9283	9.90297	19.3745	26.9792	37.7883	60.4833	44.0881	45.4164	25.0159	21.48	49.9132	37.1347	23.1068	44.7263	39.755	21.8844	29.5502	31.8308	28.1851	19.9983	40.7985	57.1711	39.8645	33.3962	16.2631	22.3774	24.447	39.8762
WP_028264340.1	MVTLTIDNIQVTVPEQTSILDAARMAGIYIPTLCYLKDLNEIGACRVCIVEIEGIDQLVASCNNYVLDGMVVHTNSKKVREARRMNVELLLSTHNSSCTSCVRSRNCSLQNVSNDLGIYYQDFPNTHVPFTPWNKDYPLIRDNSKCIGCYRCIQVCDKVQNSHVWSMTSRTHHAVVDVVGGKDFSEADCTLCGQCVVNCPTGALRERDDTERVWDALSDPDTCCVVQIAPSIRTAWGEEFGIEPADANLSQLVAALRKLGFDYVINTDFSADLTIMEESAELLEHLPQSQNGGLPLFTSCCPGWMRYAKAHYPQLVDYISTCKSPQQMMGAVVKSYFAQQIGVEPSSVFSVSVMPCIAKKSEAKIPDMCNADELRDVDVVLTTRELVRMIRANHIAVHD…	[FeFe] Group A2	[FeFe] Group A2	Evolving	Labile	2	[FeFe]-centre, 3 x [4Fe4S] clusters, 1 x [2Fe2S] cluster	NADH-dependent glutamate synthase	1.60261	1.24489	1.54457	2.325	5.65234	2.75887	0	1.09572	1.83881	3.67647	0.684393	1.62598	2.74687	0	2.60604	3.22908	2.99768	1.84333	1.51208	0	0.454164	0.743048	2.864	5.34784	0.996904	2.14947	0.698849	1.84907	2.64122	0.985006	0.171133	1.38615	0.799931	1.35995	1.05872	1.18998	0.433716	3.09773	0	3.2596	0.643165
WP_014903221.1	MSAACHIHTDIDKCQGCNNCIRHCPVHGNIAYLDTSGNVKVKISEENCIECGECLKVCSHSARYYQDDITSFFAELKGGSRVSILTAPAIRVNFPNYKRLFGYLKSLGAHAFYDVSLGADICTWAYLKTINEKNLKTLIAQPCPVVVNYIEKYVPELLEQLSPIHSPMMCTAVYIKQYVKDTSALAMLSPCIAKKTEFESTDNTISYNVTYNNLAKYLEAHNVNLNNYEEVEFNDLDCSLGLLFSRPGGLRENVEARNPDAWVRQVEGPQEACDYLKTYSSRLKQGKSAPLLVDILNCSHGCNIGTGTSLDKSVLDDIDNTLNSLKVVKREERVRNKHFSKMSRLNWLDEYFTKNLRLSDFFRAYDRNRALKPLSNPSESELNSIYIKMHKTTQEAKEL…	[FeFe] Group C	[FeFe] Group C2	Sensory	Labile	1	[FeFe]-centre, 2 x [4Fe4S] clusters, PAS domain	Fusion with methyl-accepting chemotaxis protein	14.1678	14.2536	10.2972	4.64999	11.3047	2.75887	6.23553	0	9.65373	3.67647	13.6879	14.6338	1.37344	2.32935	10.9454	41.978	17.9861	18.4333	28.7296	39.3644	36.3331	13.6225	8.59201	23.174	5.48297	3.22421	13.977	6.47175	3.01854	23.1476	14.0329	4.62051	4.79958	21.7592	32.8204	17.2548	5.2046	2.3233	1.72134	5.97593	12.8633
WP_005367839.1	MITLEINSKAIEVEEGTTVLEAAKKMNIKIPTLCHMDLHDIRFMNKHASCRVCLVEQEDSGKLIPACATFVKDGMKIKTETARAVKARRTMVELLLSDHPNSCLTCARNLDCELQKLASDLGVRAIKYQGEQSTYEIDDNSHSIVRDANKCILCKRCETMCNEIQTVGALTDVGRGFNTYVGSAFNDAMYETTCTFCGQCLAVCPTGALTEVNNTPHVWDVLHSDKTVIVQVAPAVRVALGEEFGMEPGTIVTGKMINALKYLGFDKVFDTNFAADLTIMEEASEFVHRLNNGGKLPILTSCCPSWVNFFEHQFTDFLDIPSTCKSPHEMFGAIAKTYLAQKLNIDPKNMVLVSVMPCVAKKYEAARPELGNGAGKDVDYVITTRELALMIKEAGINFG…	[FeFe] Group A3	[FeFe] Group A3	Bifurcating	Labile	3	[FeFe]-centre, 3 x [4Fe4S] clusters, 1 x [2Fe2S] cluster	NADH dehydrogenase, thioredoxin	0.599794	0.311848	0	1.55	0	0.919623	1.91862	4.38288	0	1.83824	0	0	1.37344	0	0.521209	0	0	1.3825	1.51208	0	0.454164	0	0	0	0	0	0.698849	0	0	0.492503	0.342266	0	0	0.339987	0	0	1.73487	1.54886	0	0.543267	0
WP_014296384.1	MNGNIIYTEPEKCTLCYNCIRVCPVHANKVYDDYVEPDSDLCIKCGQCILSCESQARRYRKDIDIFEDFKNKNEYLVAIIAPAYVGDLENTTPNQYAAALKKLGFNEVHEVAFGAELTTLEVLKEMEEKKPEYVIMSPCPSLINYLEKWQPDLLQYFSESYSPMLSTAAFVKKEKPNAKVVFISPCTAKKSEIEHESIKGLVDIVLTFEEINELFEKNNIKPSVLEEELFDGYQPNYATLFPVSGGLTKTAASYLKNKKIDDIMLEEDVLVIEGKERSIPFFKDFEKNIKAGKKDVTPKFIDILFCEGCIDGPATRKDIPLFEKRAKIIKYTKDRLVKNKFLTKDGKQVAQKTISLKDTKKIYEEMNLKRYFKAKPVNYKEPPESFIVKILEKTNRLND…	[FeFe] Group C	[FeFe] Group C3	Sensory	Labile	1	[FeFe]-centre, 2 x [4Fe4S] clusters, PAS domain	Fusion with methyl-accepting chemotaxis protein	5.13909	4.98418	6.69316	2.325	11.3047	1.83925	0.959312	0	5.51642	0.919119	3.42196	4.87794	0	0	9.38176	4.84362	2.99768	11.06	7.56041	6.29831	3.63331	6.31591	2.864	7.13046	3.98762	0	6.98849	3.69814	0.754635	7.88005	6.67419	1.38615	2.39979	2.03992	6.35234	14.2798	4.77088	6.96989	1.72134	1.6298	6.43165
WP_005035184.1	MDHLSSHKRIKVNVNHREIQVYSDLTILQALLQENLHIPHLCYDIRLERSIGNCGLCVVEVVEGEVIREVKACQTPIREGMVIHTQNPKLESYRKVRLQQILADHNADCVAPCVQTCPAGIDIQKYLRHASHGNFENALRVIKDRNPFPQACGRVCPHPCETQCRRNLVDTPVAINHVKRFIADWDISRDTAWLPEKEAPTGKRIAIVGGGPSGLSAAYYSAINGHEVTVFERQPEAGGMMRYGIPEYRLPKVTLDAEINHIQKLGVRLETGRSLGTHLRLEELRNNFDAVFLAIGSWRATSMNLEGENQDGVWQGINFLAAVTKRAPVHLGETVVVVGGGNTAIDCARVAQRMGAKKVQLLYRRTQEEMPAEPMEIEEALHEGVEMLFLTAPQAITAA…	[FeFe] Group A1	[FeFe] Group A1	Evolving	Labile	1	[FeFe]-centre, 3 x [4Fe4S] clusters, 1 x [2Fe2S] cluster	None	16.8873	16.5389	12.8715	17.05	14.1309	19.3121	11.9914	9.86149	18.3881	23.8971	12.3191	14.6338	18.5414	4.6587	8.86055	4.30544	20.9838	13.825	10.5846	17.3203	7.26662	20.5577	27.208	16.0435	14.7043	29.5553	13.2781	13.868	11.6968	13.2976	14.2041	12.0133	30.3974	12.2395	13.7634	16.0648	14.3126	20.9097	26.6808	26.6201	15.436
WP_013613427.1	MDLKPIYTEPENCQDCYKCVRECPVKAIQIEDNKAYIIEERCIYCGHCTQVCPTGAKKIRDGVSRTRLILQNYPRVILSLAPSWACEFEDLSIGQLIAAIRKLGFSGVSETAIGAELVSSRVSDYLQQSQPGVYISSACPVVVEYIRKYSAEHTPAITPMLSPMLAHARILKDYYGNDLKVIFAGPCICKKLEADHFKELVEVAITFKDLKNWFEKENIHPEQLTPAAEDHFIPWQAGIGSLYPVEGGMLPGIDGESKKIVKMAFSDLSNIKDVIKNLDTRREKDTIFLELLACKGGCINGPAKLSQTSLAIKRYNIQQHRAAHPESTVPDLGHIDLTTTFKAYDCSTARHTEEEIKQALSAVGKNSPEDELNCSGCGYDSCRDFAVALVEGRAEENMC…	[FeFe] Group C	[FeFe] Group C3	Sensory	Labile	3	[FeFe]-centre, 2 x [4Fe4S] clusters, PAS domain	Phosphatase, thioredoxin	4.29663	3.74014	0	0	11.3047	2.29906	1.43897	3.28716	5.05672	9.19119	2.05318	4.87794	0	4.6587	0	0	11.9907	1.84333	1.51208	0	0	10.0311	20.048	0	0.747678	0.537368	4.19309	0	0.377317	0.492503	16.9422	0	0	0	3.17617	0.594992	0	3.09773	0.430335	4.8894	1.92949
WP_013757426.1	MSTSVKPVIRVDKSKCVNCHRCITVCPAKMCNDGSGNYVGVNTDLCIGCGECIEACSHGARVGLDDADDFFRAVKNGEPVVAVVSPAVAASFNGEYLRLNGWLKSVGVKAVFDVSFGAELAVQSYAEYMRRQDPKLVIAQTCPVLVSFIEIYRPELIPYLAPVDSPVLHTMKWIRQFKPEYASAKIAAITPCYAARLEFDETGTGDFNVTIKSLESYIESHGIDLSSFPETEFETPPAERAVTFSTPGGLTRTAERVMPGISGITRRIEGQPQIFTYLAHLSKAIKSGDAPVFKLVDCLNCEMGCNAGPATSNSTCNRDKVEGYIERRAVKAALKAGKRRKPITSAKMNKSLEKYRKPGLYDRTYVDRSDKFAESFHIPTDAELKNMYRAMRKETKNDM…	[FeFe] Group C	[FeFe] Group C2	Sensory	Labile	1	[FeFe]-centre, 2 x [4Fe4S] clusters, PAS domain	Fusion with methyl-accepting chemotaxis protein	2.55091	2.3063	0.514858	0.774999	0	0.919623	0.479656	1.09572	4.13731	0.919119	1.36879	1.62598	0	2.32935	4.16967	4.84362	0	2.30416	9.0725	9.44746	1.36249	6.06822	1.432	7.13046	2.49226	0	2.79539	0	0	4.43253	3.25153	0.462051	0.799931	2.37991	3.17617	13.6848	0	1.54886	0	0.543267	1.92949
WP_026892187.1	MATSDATLHRITHQVLLEVAKYVWEDKIEESRNEIPYHIIPGPKAQFRCCIYREREIIRERVRLAEGLCPSGKDTTNIVQVINSACEGCPIARYVVTDNCQLCMGKACQASCNFGAITMGHDRAHIDPDKCKECGKCSQACPYNAIADLTRPCKKSCPVDAITMDENDIVVIDEKKCIQCGACVNGCPFGAIGTKTFLADVIRLIKAGKKVVAMVAPATEGQYGPDITMASWKTALKKAGFADMVEVALGGDLTAAAEAAEWAEAYEEGKKMTTSCCPAFVNMIRQHYPMLLENMSTTVSPMCAVSRMLKEKDPETVTVFIGPCIAKKSESLDLNVKDNADYVLTLGEAVALMQAKGVELEPEENTYQQASVFGKRFGNGGGVTAAVLECLKETEKNTD…	[FeFe] Group B	[FeFe] Group B	Evolving	Labile	1	[FeFe]-centre, 3 x [4Fe4S] clusters, 1 x [2Fe2S] cluster	None	4.55989	5.98993	5.14858	3.09999	8.47851	0.919623	7.19484	8.76577	2.29851	1.83824	1.36879	0	19.9148	11.6467	6.77572	1.61454	5.99537	3.68666	4.53625	1.57458	2.72498	14.861	7.16001	5.34784	0.249226	4.83632	3.49424	0.924536	2.2639	3.44752	3.42266	0.462051	1.59986	0.339987	6.35234	5.35493	0.867433	2.3233	2.58201	7.06247	1.92949
WP_007216264.1	MEEKQITLQIDRHYITVPEGSTILEAARKIGIDIPTLCHIDLKGTCVKNNPASCRICVVEVEGRRNLAPACATRCTEGMVVRTSTLRVMNARKVVAELILSDHPNDCLTCPKCGDCELQTLALRFNIRRMPYNGGELSPRKREVTSSIVRNMDKCIFCRRCESVCNEVQTVGALGAIRRGFNTTIAPAFDKMMSDSECTYCGQCVAVCPVGALTERDHTNRLLLDLENPDKVVIVQTAPAVRAALGEEFGLPAGTLVTGKMVYALRELGFDYVFDTDFAADLTIMEEGAEILNRLTRYMNGDKSVRLPILTSCCPAWVNFFEHHFPDMLDIPSTARSPQQMFGSIAKTFWAEKMGIPREKLVVVSIMPCLAKKYECDRNEFKTDGSPDVDYSISTRELA…	[FeFe] Group A3	[FeFe] Group A3	Bifurcating	Labile	2	[FeFe]-centre, 3 x [4Fe4S] clusters, 1 x [2Fe2S] cluster	NADH dehydrogenase	0.484032	0.244217	0	0	0	0	0	0	0	2.75736	1.36879	1.62598	6.86718	0	0	0	0	0	0	0	0	0.371524	0	0	0	0	0	0.924536	0.754635	0	0	0	0	0	0	0	0	0.774432	0	0	0
WP_013738980.1	MVNLTINGLPVQAPESATILEAAALVNIHIPTICFLKDINEIGACRVCVVEIEGVDKLASACNNRVREGMVVLTNSPRVRQTRRTNVELILSEHDCFCATCVRSGNCALQKVANDLGILELPYERRPAPTKWDHSFPLFRDAAKCIKCMRCIQVCDKIQGLNIWDLVGTGSRTTVDVSFSRKITDADCALCGQCITHCPVGALRERDDTQRMFQAIANPKKITVIQIAPAVRAAWGEALGLPREKATVKRLVAALRKIGFDYVFDTTFSADLTIMEEGHEFLERLAGRNDHPWPMFTSCCPGWVRFIKSQYPDMTENLSTAKSPQQMFGAVAKTYYAQLLGANPADIFSVSIMPCVAKKSEAELPTMNDAEAAQDVDLVLTTREIVRMIRAEKIDVKSL…	[FeFe] Group A2	[FeFe] Group A2	Evolving	Labile	2	[FeFe]-centre, 3 x [4Fe4S] clusters, 1 x [2Fe2S] cluster	NADH-dependent glutamate synthase	5.45947	4.79193	8.23773	7.74999	14.1309	4.1383	3.83725	4.38288	8.27463	5.51471	4.10636	4.87794	8.24061	4.6587	2.60604	1.61454	5.99537	5.52999	3.02417	4.72373	2.72498	5.20133	22.912	3.56523	4.48607	6.44842	2.79539	6.47175	6.79171	5.41753	4.44946	3.23436	2.39979	3.05989	5.29362	4.16495	0.867433	18.5864	0.86067	10.3221	1.92949
WP_018962529.1	MDKVTVTIDGVTVEVPANYTVLQACREAGIDIPTLCYAEGLNEIGSCRLCVVEIEGAKALAASCIYPVANGMKIHTNTPRVRQARKVNLELILSNHDRSCLTCVRNTNCELQNLANRFGVSEIEFQGENIDYPLDNVSPAIVRNPNKCVLCRRCISECQNVQNVFAIGAVNRGIKTLVSSPFYLSLNDSPCISCGQCITVCPTGALYEKDHISRVYDAIADKKKHVVVQTAPAVRVALGEEFGMPVGTIVTGKMAAALRRLGFDVVFDTDFGADLTIMEEGSELIERLKYGGKLPMITSCSPGWINFCEKYYPDFLENLSSCKSPHMMLGAVIKSYYAQKMGWNPEDVFVVSVMPCTAKKVEIERPENMHDGLQDVDAVLTTRELARMIKEAGIDFVNL…	[FeFe] Group A3	[FeFe] Group A3	Bifurcating	Labile	4	[FeFe]-centre, 3 x [4Fe4S] clusters, 1 x [2Fe2S] cluster	NADH dehydrogenase, thioredoxin, thioredoxin	0.741933	0.537837	1.02972	0.774999	1.41309	2.29906	0	0	0	0	0	0	0.686718	0	0	0	0	2.30416	0	0	0.908327	0.371524	2.864	0	0.996904	0.537368	0	0.924536	1.50927	0.985006	0	0.462051	0	0	1.05872	0.594992	0	2.3233	0.86067	2.17307	1.28633
WP_006059213.1	MTKINLKINNIPVQAEPGSTILEAARAAGIQIPTLCYLKDVNKTGACRVCTVEIKGAKSLGAACVYPVSEGMEVFTNSQRALEARKHTVELILSNHCGDCLSCIRNQNCELQKLAQQLGIRKVRYEGEKTPPTFDEVAPGIVRDTSKCVLCGRCIETCKKVQGLGILSFINRGFNTKVAPVFDKSFNDVNCMQCGQCVNACPVGALFEKEDIHRVIEALNDPEQHVVVQTAPAVRAALGEEFGLPIGTRVTGKMAAALRRIGFDRVYDTNYAADLTIMEEGHEFIERVQHQGVLPMITSCSPGWIRYCEFEYPDLLEHLSSCKSPHMMFGAILKSYYAQTHNLDPRKITVVSIMPCTAKKAEVVRPEMRKDGVADVDVVLTTRELGRLIKMYGINFENL…	[FeFe] Group A3	[FeFe] Group A3	Bifurcating	Labile	4	[FeFe]-centre, 3 x [4Fe4S] clusters, 1 x [2Fe2S] cluster	NADH dehydrogenase, thioredoxin, thioredoxin	2.11014	2.08112	3.08915	7.74999	1.41309	1.37943	0	0	0.459702	0.919119	0	8.1299	0.686718	0	0	0	0	3.22583	7.56041	0	1.81665	1.98146	1.432	0	0.996904	3.22421	1.3977	12.9435	1.88659	1.47751	1.71133	6.00666	0	0.339987	0	2.37997	0.433716	0.774432	2.15167	3.80287	0
WP_027398115.1	MGIIQFKKANCKHCYKCVRKCYVKAIALKDEQAQIIERECILCGQCFLVCPQNAKYIKTDIYKIKNYIKRGEKVYVSLAPSFASAFDGISFRVMSSALKRLGFMGVEETAIGAGMVTAEYEKILKSGKMRNMITTCCPTVNLLIENYFPDLLQYAAPVVSPAIAHGQVLKKVYGKDIKVVFVGPCISKKYEAEKSISINATLMFDELLNWLEEENISLNKLDENPTEMHGIVNRLYPIPGGILKTVSNDSKKTYKSIAVDGLDRCIQMLEALREDLYARKEIKGYFIEMSACPGSCSYGPALKDYDKPLLLARENIIENARKCTHTKIPKTETEKVDLFYEYENLQAPEDLPSEDELNAILESMGKTSEKNIYNCGACGYDTCREKAIAVWQGKAEIKM…	[FeFe] Group C	[FeFe] Group C3	Sensory	Labile	3	[FeFe]-centre, 2 x [4Fe4S] clusters, PAS domain	Phosphatase, thioredoxin	0.33985	0.172156	0	2.325	0	0.459812	0	0	0.459702	0.919119	0.684393	0	0	0	0	0	0	0.921666	0	0	0	0.247683	1.432	0	0.498452	0	1.3977	0	0	0	0	1.38615	0	0	0	0.594992	0	0	0	0.543267	0
WP_026649549.1	MGHMIIDGRKVEFTDEKNVLSVIRKAGINIPTLCYHSEVSTFGACRLCTVEDERGKTFASCSEQPRDGMVIYTNSGRVKKYRKLIVELLLAAHCRDCTTCVKSGECVLQELAHRLGVQTIRFKNTREYHELDTSSPSLVRDPNKCILCGDCVRACEELQGIGALGFAFRGTEAMVMPAFNKKIAETECVNCGQCRVYCPTGAIAIKTHMDEAWEALADPNIRVVAQIAPAVRVAVGDHYGLTKGKSVMGKIVNALHRMGFDEVYDTSFSADLTIMEESAEFLDRIKKGEKLPLLTSCCPAWVKFITDQYKEYIPNLSTCRSPQGMLSAVIKEYFRDPEHAGGKKTVMISIMPCTAKKAEAVRPNSFTDGEQDTDIVITTTELLRMIDNFGLDFATLDPE…	[FeFe] Group A1	[FeFe] Group A1	Evolving	Labile	1	[FeFe]-centre, 3 x [4Fe4S] clusters, 1 x [2Fe2S] cluster	None	353.779	365.945	194.616	237.15	156.853	244.62	621.634	358.301	365.463	203.125	359.306	346.334	638.648	377.354	138.642	145.847	173.866	376.961	396.166	234.612	351.069	149.105	110.264	180.044	102.432	165.509	239.705	921.762	405.616	695.414	171.818	329.442	471.159	901.646	421.372	492.654	902.998	272.6	703.167	115.716	611.006
WP_016314690.1	MDTVKLWIDDIETEVPKGTTVLQAARGLGIHIPTLCHLQGMNHPSSCRVCLVESGPRLIASCTLVAEDGMRIRTNTPRVRKARKTTVELILSDHHRECLTCLRSGTCELQEVANQIGVRDVRYAGGQARSTVDFSSPSIVRDTSKCLLCGRCVSVCSEVQTVGAIGFMNRGFNTVIGPALGRPIGESVCVNCGQCIMACPVGALQERENVGDVWQAIADPHKFVVVQTAPAVRVALGEEFGMPIGTRVTGKMVAALRRLGFNKVFDTDFAADLTIMEEGTELMHRLATGENLPLMTSCCPGWVKFVEHFFPDMRENLSSCKSPHEMEGAMIKSYFAQMMGIDPGNLVVVSIMPCTAKKFEAQREELAHESFPDVDYVLTTRELARMIKEAGIDFVNLKG…	[FeFe] Group A3	[FeFe] Group A3	Bifurcating	Labile	4	[FeFe]-centre, 3 x [4Fe4S] clusters, 1 x [2Fe2S] cluster	NADH dehydrogenase, thioredoxin, thioredoxin	0.34067	0.132505	0.514858	0.774999	0	0	0	0	1.83881	0	0	0	1.37344	0	2.08484	0	0	0	0	0	0	0.495365	2.864	0	0.249226	0	0.698849	0	0.377317	0	0.171133	0	1.59986	0	0	0	0	0	0	2.71633	0
WP_005680505.1	MEDKQITLQIDGHFITVPEGSTILEAATKIGINIPTLCHIDLKGTCIKNNPASCRICVVEVIGRRNLAPACATRCTEGMVVKTSTLRVMNARKVVAELILSDHPNDCLTCPKCGNCELQTLALRFNIREMPFNGGELSPRKREITASIVRNMDKCIFCRRCESVCNDVQTVGALSAIRRGFNTTIAPAFDRMMTESECTYCGQCVAVCPVGALTERDYTNRLLDDLANPDKVVIVQTAPAVRAALGEEFGFPPGTVVTGKMVYALRELGFDYVFDTDFAADLTIMEEGSEILNRLTCYLNGDKSVRLPILTSCCPAWVNFFEHHFPDLLDIPSTARSPQQMFGSIAKSYWAKKMGIPKEKLVVVSIMPCLAKKYECARDEFKVNGIPDVDYSISTRELA…	[FeFe] Group A3	[FeFe] Group A3	Bifurcating	Labile	2	[FeFe]-centre, 3 x [4Fe4S] clusters, 1 x [2Fe2S] cluster	NADH dehydrogenase	7.82922	21.3475	6.69316	7.74999	4.23926	6.43736	0	0	0	37.6839	2.73757	69.9172	14.4211	6.98804	0	0.53818	0	6.45166	3.02417	1.57458	3.17915	11.3934	0	0	7.22756	10.21	11.1816	0	4.15049	1.47751	55.1049	0	0	0	0	1.18998	0	1.54886	0.430335	19.0143	2.57266
WP_026835345.1	MAKRSIVPFGPQHPVLPEPIHLDLVLEDETVVEALPSIGYIHRGLESLVAKKDFNEMAYVTERICGICSFMHGMGYCSTIEKIMGLEVPERANYLRTIWCEMSRLHSHLLWLGLLADAFGFEALFMECWKIREKILDMFEESTGGRVIFSVNKIGGVLKDMPAEMLADFMKRLDGMQKELKKATKVFMNDYTVKSRLEGIGILSKEDAIACGAVGPMMRASGIEVDMRKTGYAAYKDIDFQVITSDRCDSYGRCEVRIGEIFQSIEIIRQAIAQIPDTELSVMAKGFPKGEAFVRFEQPRGEAFYYSRANGTKNLDRMRVRTPTFANLPSLVKILQGAQYGDVPLLVLTIDPCISCTER	[NiFe] Group 4e	[NiFe] Group 4e	Evolving	Sensitive	6	[NiFe]-centre, 1 x [4Fe4S] clusters	NuoL, NuoH, NuoC, [FeS] protein	1.41553	2.15499	1.54457	0	0	2.29906	3.83725	0	0.459702	1.83824	1.36879	4.87794	1.37344	0	1.56363	0	0	3.68666	0	0	7.26662	0.123841	1.432	0	0	0.537368	1.3977	0.924536	2.2639	0.492503	1.19793	0	7.19937	0	0	1.18998	3.90345	0	0	1.08653	0
WP_008907580.1	MELVKLTIDGFEVEVPKGTTVLEAARKIGIEIPTLCYLKDVNKFGACRVCVVEVGPRLLASCTLEAENGMVVKTNTQKVREARKAVVELILSNHKRECTTCIRSENCELQKVSKELNIRDLRFEGEKTHEDIDSASASVVRDPEKCILCGRCIATCSEVQTVYAINFARRGFKTKVSPAFNKSLADTVCINCGQCIMACPVGALHEKENIKEVWMAISNPEKFVVVQTAPAVRVALGEEFGMPIGTRVTGKMVAALRRLGFDKVFDTDFGADLTIMEEGTELLNRLNKGERLPLMTSCCPGWVKFVEHYYPEMTENLSTCKSPSEMEGALIKTYFAEKMGIDPKNIVTVSIMPCVGKKFEGQREELSHNGLQDVDYVLTTRELAQMIKEAGIDFVNLPD…	[FeFe] Group A3	[FeFe] Group A3	Bifurcating	Labile	4	[FeFe]-centre, 3 x [4Fe4S] clusters, 1 x [2Fe2S] cluster	NADH dehydrogenase, thioredoxin, thioredoxin	2.87857	2.68838	3.08915	0.774999	7.06543	3.67849	3.35759	4.38288	1.83881	6.43383	5.47514	3.25196	0.686718	0	3.12725	0.53818	0	6.45166	3.02417	0	0.908327	1.23841	2.864	0	3.98762	3.22421	1.3977	2.77361	6.03708	1.97001	1.0268	2.31025	3.19972	3.39987	4.2349	1.78498	4.77088	0	0.86067	3.80287	3.21582
WP_022278255.1	MAFTNNVMIVRHKLLENLVALWKENQLVEKIDRIPIEFSPRRSQAVGRCCIHKERAVTKYKSLPLLGWDMSDETDELTPLSEYAKKALERRGKIKENILCVIDEACSSCVQVNYEVSNLCRGCVARSCYMNCPKGAVHFDKKTGQAHIDHDTCISCGICHKSCPYHAIVYIPVPCEEACPVKAISKDEHNIEHINEDKCIYCGKCLNACPFGAIFEISQVFDILEAIRAGEKLIAIPAPSILGQFKATIDQVYGALKEVGFADVIEVAEGAMETTSNEAHELLEKLEEGQKFMTTSCCPSYIELVNKHIPDMKKYVSSTGSPMYYAARIAKKKYPDAKVVFIGPCIAKRKEAQRDECVDYVMTFEELHPLFRGLGIELEQATPYKVARESVCEAHGFAQ…	[FeFe] Group B	[FeFe] Group B	Evolving	Labile	1	[FeFe]-centre, 3 x [4Fe4S] clusters, 1 x [2Fe2S] cluster	None	1.75807	1.64236	1.54457	1.55	0	1.37943	0	1.09572	0.919403	0.919119	1.36879	8.1299	3.43359	9.31739	0	0	2.99768	5.52999	1.51208	1.57458	0	1.4861	15.752	0	0.249226	1.07474	0	0	1.13195	0.492503	3.25153	0	0	0	1.05872	0	0	0.774432	0	5.97593	0
WP_015560436.1	MYADENVIKIKHDVLYTVAKLAFEGRLEEERDHIATELIPGPTPQFRCCIYKEREIIRQRVRLAEGKAPGAEDDGNVIQVISSACEDCPISSYTVTENCQNCLGKACVNACKFGAIEPGRDRSHIDPSKCKECGRCAQACPYNAIAHLKRPCKFSCPVNAITYNEYGISVIDKEKCIRCGKCIHSCPFGAIASKTFIVPVIEALKAGKHIYAMAAPATEGQFGVDITMASWKKAMKEMGFTDFYDVGLGGDMTAAYEAEEWAEAYKEGNKKVTSCCPAFVNMVRLHYPELAECVSTTVSPMCAVSRLIKAKDPEAITVFIGPCVAKKSEVADQKIEGNADYVLTYSEIRAMMKAKGVELQPCANDDQTASTFGKRFANSGGVTAAVLESLKESNDEIAA…	[FeFe] Group B	[FeFe] Group B	Evolving	Labile	1	[FeFe]-centre, 3 x [4Fe4S] clusters, 1 x [2Fe2S] cluster	None	101.434	107.313	175.567	129.425	19.7832	60.2353	32.6166	41.6374	22.0657	12.8677	43.1167	104.063	26.0953	55.9043	63.0663	513.424	107.917	43.7791	161.793	244.059	137.157	55.8524	11.456	156.87	23.178	83.8295	121.6	73.9628	94.3293	118.693	80.6037	43.8948	71.9937	148.914	190.57	183.853	111.899	37.1728	43.4638	26.0768	112.554
WP_024286662.1	MRELSESDRFTITVNNREIQVFGGLTILQALVMEDIEVPSLCHDIRLKRSNGSCGLCVVEVGTEAPRDVKACLTPVQPDMVITTHSPRLEEYRKVRLQQLLCDHNADCVAPCVETCPANIDIQTYLSHVADGNYQAAIHVIKDRNPFPSVCGRVCPHPCESECRRSLVDEPVAINYVKRFAADWDMAQDEPWIPRVDAPTGKRIAVVGAGPSGLSAAYYSAISGHAVTVFEKQDHAGGMMRYGIPEYRLPKATLDQEIGVIQALGVQIVTGKALGTHLSLEDLKRDFDSVYLSIGSWRATPLGIDGDRNERVELGIDYLRHIAKGSTRSRGDTVVVIGGGNTAIDCVRTALRKGAKSVKLIYRRTRDEMPAEAFEVAEALHEGVEMIFLTAPTKITTAE…	[FeFe] Group A1	[FeFe] Group A1	Evolving	Labile	1	[FeFe]-centre, 3 x [4Fe4S] clusters, 1 x [2Fe2S] cluster	None	2.16904	3.83945	3.60401	2.325	1.41309	2.75887	1.43897	2.19144	0.919403	0.919119	1.36879	1.62598	1.37344	0	2.08484	1.07636	0	2.30416	4.53625	1.57458	1.36249	1.85762	5.72801	1.78261	1.49536	3.22421	3.49424	1.84907	6.03708	0.985006	2.0536	4.62051	0.799931	0.339987	1.05872	1.78498	1.30115	0.774432	1.291	2.71633	1.92949
WP_016147607.1	MRTFETDVQLLKYRVLKAVAKRAYEGTLMESYYEIPKLISPGPKPTMRCCVYKERAIVQERVRLAMGGDRRNPNIIEVIEIACDECPVERYMVSESCRGCISQRCIKTCPKQAISKKNGKAHIDFDLCIECGRCAKVCPYGAITEHVRPCERSCKVGAIHMNEEKKAEINPEKCISCGACSYACPFGAIMDKSFMVDAINIIRNKKENYKTVAIVAPAIAAQFDGVTLGQVATAIRQLGFDYVVEAAIGADMVADKEAEELVEKGFLTSSCCPAFVDYIKKHVPELADKISHNLSPMAEIGKFVKLGGESPVKCIFIGPCTAKKAEMRLPNVDLWIDSVLTFEELQAMIDAREIEMESLEETSMNDASYFGRIFGRSGGLTEAVLEVIKEKGLDFEVKA…	[FeFe] Group B	[FeFe] Group B	Evolving	Labile	1	[FeFe]-centre, 3 x [4Fe4S] clusters, 1 x [2Fe2S] cluster	None	2.58296	2.14107	0.514858	1.55	9.8916	3.67849	1.43897	1.09572	3.67761	2.75736	0.684393	4.87794	11.6742	0	2.08484	0	2.99768	0.921666	0	4.72373	1.36249	3.21987	7.16001	0	1.49536	2.14947	0.698849	5.54721	2.64122	0.985006	1.19793	2.31025	0	0.679975	4.2349	0.594992	0.867433	4.64659	0.430335	2.71633	0
WP_013787823.1	MDKVRITIDGIPVEVPANYTVLQAAKYANIDIPTLCYLKEINEIGACRLCVVEIKGVRNLQTSCVYPVSDGMEIYTNTPRVREARKSNLELILSAHDRSCLTCVRSGNCELQDLSRKFGIDEIRFMGENIKYQKDESSPSIVRDPNKCVLCRRCVATCNNVQNVFAIGMVNRGFKTIVAPSFGRGLNESPCISCGQCIEACPVGAIYEKDHTKMVYDALLDEKKYVVAQTAPAVRVALGEEFGMPYGSIVTGKMVSALKRLGFDKVFDTDFAADLTIIEEGNELLKRLNEGGKLPMITSCSPGWINYCERYYPEFIDNLSTCKSPHMMMGAIIKSYFAEKEGIDPKDIFVVSIMPCTAKKGEIDRPQMIVDGMKDVDAVLTTRELARMIKQSGIDFVSL…	[FeFe] Group A3	[FeFe] Group A3	Bifurcating	Labile	4	[FeFe]-centre, 3 x [4Fe4S] clusters, 1 x [2Fe2S] cluster	NADH dehydrogenase, thioredoxin, thioredoxin	0.278435	0.0479032	0	0	0	0.459812	0.479656	0	0.459702	0	0.684393	1.62598	0.686718	0	1.04242	0.53818	0	0	0	0	0	0	1.432	1.78261	0.747678	0	0	0	0.377317	0	0	0	0	0	0	0	0	0	0	1.08653	0.643165
WP_031366038.1	MKEVTIKINGKTYTAPEGTTILEAARLNNIDIPTLCFLKEINEIGACRICLTEVEGMNNLVTSCVYPITEGMSIKTNSDRVFKSRKTNLELILSTHERKCLSCIRNGNCELQKLCKAFNVDDEDYYNGENCEYEFDDSSVHMYRNNNKCILCRRCVAVCKKIQSVGVIGANDRGFNTHIGSAYEQDLGDVDCISCGQCIVVCPTGAIAEKDQTQEVWEALQDPTKHVVVQTAPSVRVTLGEAFQLPVGTNVEGKMVAALRRIGFDRVFDTNVAADFTIMEEATEFLQRVENNGPFPMFTSCSPGWVKYCEAYHPELIPNLSSCKSPQQMFGALIKTWYAQKNNIDPEDIFVVGIMPCTAKKFEVTRENQAAAGYTDVDIALTTRELARMIEKVGIRFNE…	[FeFe] Group A3	[FeFe] Group A3	Bifurcating	Labile	3	[FeFe]-centre, 3 x [4Fe4S] clusters, 1 x [2Fe2S] cluster	NADH dehydrogenase, thioredoxin	1.08551	1.36456	0	0.774999	0	1.37943	1.91862	0	0.919403	3.67647	0.684393	0	0.686718	0	1.04242	0	0	0.921666	0	0	1.81665	0.247683	1.432	0	0.996904	1.61211	0	0.924536	0.377317	0.985006	0.342266	0	0	0	1.05872	1.78498	0	0	0.430335	2.71633	0
WP_015560495.1	MELIYANDNCTGCNKCVRDCPVLIANVATDAGKVIVDSEKCIACGACFDACEHNAREYQDDTKSFFTALEAGKKISVILAPAFFANYPHEYKKVLGYLKEKGVNHIYSVSFGADITTWGYLKYITEHQFLGGISQPCPAVVNYVEKYIPELLPKMMPIHSPMMCMAIYIKKYLKCDDELAFISPCIAKKTEITDPNCYGYVKYNVTFKKLFETIGNKYQGCKEYEDELEYGMGALYPMPGGLRENVEHFLGKEQVVRQVEGEKEAYRYLHEYLERIKKNKRQPFMVDILNCSKGCIYGTATELERNTDDVMLTLSDMRNKTANAGADAKRGLFGKKTKNGSPWDESVPEKDRLVNLMKAFEDLDINDFVRKYTNKSVEIKEPAEHEMQEIFASMNKTDA…	[FeFe] Group C	[FeFe] Group C2	Sensory	Labile	1	[FeFe]-centre, 2 x [4Fe4S] clusters, PAS domain	Fusion with methyl-accepting chemotaxis protein	109.128	119.401	42.2184	28.6749	90.4375	24.37	64.7535	50.4032	70.794	18.3824	78.0208	175.606	32.2757	88.5152	94.3388	466.602	134.896	123.503	243.445	166.905	254.786	126.566	65.8721	229.957	57.5712	75.769	137.673	31.4342	15.47	181.241	108.67	50.8256	59.1949	199.913	197.981	147.558	33.8299	47.2404	14.2011	19.0143	75.2503
WP_004099977.1	MSQVTEVIKIQRKVWAEITRMTLAGELEANVDEILRTVVTENGPRYRCCVHKERAVLRDRINMALSQPIASDIQVSAGRSLEGHMEEGPLVRVLPEACDRCPIDKFMVTDACRNCLAHNCINSCPKKAIMVVQNRAYIDKTQCVECGMCKKSCSYGAIIEISRPCERACDLKAISAAADRRAAIDYGKCVQCGSCKVACPFGAISDRSFIVQVIQAIKAQKPVYAIIAPAFIGQFGLKVRPGQVTSALLQFGFEAVREVALGADIVTLEETKEFVAAVPAKKKYLTTSCCPAFVTMIEKHLPDSLTHVSTTVSPMIATAKMIKQENPSAVVVFLGPCIAKKAEGWQNRDMVDYVLTFEEMAAMLDGAGINIAETEEREYQVSASRDGYMFARTGGVMQA…	[FeFe] Group B	[FeFe] Group B	Evolving	Labile	1	[FeFe]-centre, 3 x [4Fe4S] clusters, 1 x [2Fe2S] cluster	None	0.571185	0.35968	0	0	2.82617	0	0	0	0	2.75736	0	1.62598	2.06015	0	0	0.53818	0	0.921666	1.51208	0	0	0	0	0	2.24303	0	0	0	0	0	1.19793	0	0	0	0	0	0	0	0	0.543267	0
WP_012158849.1	MKGAMIVDGRKVEFDREKNVLEVVRKAGINLPTFCYHSELSIYGACRMCIVEDERGNTFASCSQLPSDGMKIFTNTPKIRKYRKTILEMILANHERDCTACDRTGICELQDLAIRFGIKDIRFDETRKHLPIDKSSLSIVRNPNKCILCGDCVRVCEEMQGVGALSFAYRGSSMTVTPAFNRDIAEVNCVNCGQCRNVCPTGAIIIKNENDRVWEVVNDRSKRVIAQVAPAVRVALGEEFGLEPGEVTIGKIVAALKAIGIDEVYDTAFAADMTVIEESKEFMERLSLGEDLPLFTSCCPGWVKFAENKFPDMMDHVSSCKSPQQMFGAVLKEYYKNEKNNAEGKETVVISVMPCTAKKAEAAREEFEQEGIRDVDFVITTQELALLIKEAGIIFHQLE…	[FeFe] Group A3	[FeFe] Group A3	Bifurcating	Labile	3	[FeFe]-centre, 3 x [4Fe4S] clusters, 1 x [2Fe2S] cluster	NADH dehydrogenase, thioredoxin	0.599424	0.393348	1.54457	0	1.41309	0.459812	0	0	1.83881	0.919119	0	0	1.37344	0	4.69088	0	5.99537	0	0	0	0.908327	0.371524	1.432	0	0.498452	2.14947	0	0.924536	0	0	1.36907	0.462051	0	0	0	0.594992	0	0.774432	0	0.543267	0
WP_015358348.1	MAEYFHSVTLEKEKCRGCTNCIKHCPTEAIRVRNGKAMIINERCIDCGECIRVCPYHAKKAVTDPLSVMNEYEFRVALPAPSLYGQFGKEYSRERILKGLTELGFDWVFEVARAAEIVSDATRHILKSGKVRKPLISSACPAVVRLIQVRFPNLINNILKLESPMEVAARIAKQTVVSEKNIPAEKVGVFFISPCAAKVTSVKAPYEKKESSVNGVFSIKDIHIKLMEKMKNIPPDCDCELVSSGAYGVGWAGSGGECAALERPKTLAVHGIHNVIAIFEEIVEEKLKDVDFVEALSCIEGCLGGPLTAVNPFVAKTNLKCQVNRAKSKDFSSENTAADYQDLLWTKDMEYKPILKLDENVMKAMIKMQKLEEINDGLPGLDCGACGSPNCRALAEDIV…	[FeFe] Group C	[FeFe] Group C1	Sensory	Labile	2	[FeFe]-centre, 2 x [4Fe4S] clusters, PAS domain	Histidine kinase	0.338467	0.112835	0	0	1.41309	0.919623	0	0	0	1.83824	0	0	0	0	0	0.53818	0	1.84333	0	0	0	0.247683	0	1.78261	0.498452	0	0	0	0	0.492503	0.342266	0.462051	0	0	1.05872	0	0	0	0	1.6298	0
WP_023920491.1	MGYMTINNRRVAFTDEKNVLSVIRKSGIDLPTFCYHSELSTYGACRMCVVEDERGKVFASCSEVPRDGMVIYTNTPRLQHHRKMIIELLLSSHCRDCTTCAKNGVCTLQKLASQLGISEIRFENHKKPLPLDTSSDCVIRDPNKCILCGDCVRTCDEIQGLGILDFAFRGSKMQVMPAFNRELAETDCVGCGQCRAVCPTGAISIRQDVDPVWKALADKNIRVVAQIAPAVRVAIGDKFGIPKGENTLGRLVAALRHMGFDEVYDTNFGADLTVMEESAELLERLKSGKNLPLFTSCCPGWVKFCENRYPEFRENISTCRSPQAMFGALLKEEARMKEAEAEKEGRSLRKTVVISIMPCTAKKAEIKRPEHFTEGQQDVDYVLTTTEVTRMIKEAGIDL…	[FeFe] Group A3	[FeFe] Group A3	Bifurcating	Labile	3	[FeFe]-centre, 3 x [4Fe4S] clusters, 1 x [2Fe2S] cluster	NADH dehydrogenase, thioredoxin	23.9432	24.3222	8.75259	7.74999	55.1103	37.7046	53.2418	6.57433	10.5731	16.5441	2.73757	11.3819	75.539	67.5511	13.0302	6.99634	8.99305	31.7975	80.1404	17.3203	31.3373	32.0749	60.1441	17.8261	3.98762	13.9716	9.08503	27.7361	9.81025	12.8051	2.90926	8.31691	6.39944	1.01996	8.46979	11.8998	8.67433	10.8421	22.3774	15.2115	18.0086
WP_013174329.1	MANVTIDGIQVSVPDGSTILQAAQVAGVHVPTLCYHPDQAIKANCRICVCEVEGQRLLQAACSQPVYDGMVIKTHSPKVIEARKTILELILAHHPQDCLGCIRNQNCELQALAEEYAIRDNPFEQMVRGLPKDTSTPSIVRDPDKCVLCRRCISACSVTQTVNALGIENRGNHAMVVPSLGKDLIESPCVMCGQCIHACPVGAISEKEQIDEFLAAVADPDKIVVTQIAPAVRTAIGEEVGMATGEMPMEVFVAGLRQIGFDYVLHTNFTADLTIMEEGNELLKRLKEGGKLPMFTSCSPGWINFCETFYPDLLEHLSTCKSPQQMFGALVKTYWAQKMGIDPSKIYSVSIMPCTAKKFEASRPEMKDSGYRDVDLVLTTREVGRLFRMAGIDFKTLTP…	[FeFe] Group A1	[FeFe] Group A1	Evolving	Labile	1	[FeFe]-centre, 3 x [4Fe4S] clusters, 1 x [2Fe2S] cluster	None	0.613776	0.465921	0	0.774999	1.41309	0.919623	0.479656	0	1.3791	0	1.36879	0	0.686718	0	0	0	0	0	0	0	0	0	2.864	0	0.249226	2.14947	0.698849	0	0.377317	0.985006	0.342266	0.462051	0.799931	0	0	0.594992	0.433716	2.3233	1.291	1.6298	0.643165
WP_026368965.1	MVHLKIDGKNVEVPKGSTILDAARKLDIDVPTLCHLNLEGTPMVNKSASCRICVVEVKGRRNLAPACATPADEGMEVRTNTIRVLNARKTVLELLLSDHPKDCLICAKSGNCELQELAERFCLRENRFDGGEQSHYARDISPALIRDMDKCVLCRRCETMCNDVQTVGVLSGVNRGFKAVVAPAFEMPLEESVCTFCGQCTAVCPTGALVERDYSWKVIEALADPDKVVVVQTAPAVRAALGEPFGMPPGTLVTGKMVAALRAMGFDYVFDTDFAADLTIMEEASEFLDRLTRHLQGDTSVRLPILTSCCPAWVKFFEHRYPDLLDVPSTAKSPQQMFGAIAKTYFAEKIGVPKEKLVVVSVMPCLAKKYECSREEFSSGGIADVDMSISTRELAHLIQ…	[FeFe] Group A3	[FeFe] Group A3	Bifurcating	Labile	4	[FeFe]-centre, 3 x [4Fe4S] clusters, 1 x [2Fe2S] cluster	NADH dehydrogenase, thioredoxin, thioredoxin	0.482749	0.257126	0	0	0	0	1.43897	3.28716	1.3791	0	1.36879	0	2.06015	4.6587	0.521209	0	0	0.460833	1.51208	3.14915	0.908327	0.247683	0	0	0	0	0	0	0.377317	0.492503	0	0	0	0	0	0	0	0.774432	0	0	1.92949
WP_013380841.1	MRGIYTPVTKIRRQVFAAIAKMAYEGGDYASRVEEIPFEIIPGEVANYRDSVFKERAIIGERLRLAIGLPLYPVDQPSPISRDVEESAIAEKVYDPPLVNVIPFACDACEPKAFMVTDNCRGCLAHPCVSVCPVNAVYMKDGKSHIDKEKCVRCGRCREACPYEAIVKYDRPCAAACGVDAIESDELGRAKINYDKCVSCGMCLVNCPFGAIADKTQIFQLIHAIKEGDEVIAEIAPAFVGQFGPLATPEKIKEAIKALGFADVVEVALGADLGAVEEAHHYVNKVVKGDDPFIGTSCCPSWSVMAKTKFPEIAHCISGELTPMVATARIIKKEHPKSRIVFIGPCAAKKLEASRKSVRSDVDFVITFEELMGMFVAKGIEFGDLEDDGRLDDATAAGR…	[FeFe] Group B	[FeFe] Group B	Evolving	Labile	1	[FeFe]-centre, 2 x [4Fe4S] clusters	None	5.01741	5.18552	2.57429	3.87499	0	4.59812	5.27622	6.57433	12.4119	4.59559	3.42196	6.50392	5.49374	2.32935	3.64846	1.07636	0	3.68666	6.04833	0	3.63331	6.93511	8.59201	5.34784	5.23375	4.29895	2.79539	9.24536	4.15049	3.44752	3.5938	3.69641	7.19937	5.77978	3.17617	5.35493	3.90345	3.87216	5.59435	11.9519	2.57266
WP_003148188.1	MPGTMRGVYTNLTEIRRKVFREVSKLAYESGEKPLEEVAHKMEHLPYTIVPGEIATYRESVFLERAVAGERVRMTMGMPMQGVDHPEQLSEGIEKAAIPEVYYQPPLINIIKFACNACEDNVFRVSNACQGCLAHPCREICPKGAISFVDKKAFIDQEKCIKCGMCEKVCPYHAILHHLRPCAEACGMHAIGSDEHGRADIDYEKCVSCGQCLVNCPFGAIADKSQIFQVITAINQGNEVIATVAPSFVGQFGKGGVGKLREAFKQLGFASLEEVATGADMCTVQEAEDFLDEVPEKLPFMGTSCCPSWSAMAKMEFPDNADAISMALTPMVLSARLIRKNHPKAKIVFVGPCSAKKLEAMRRSVKSEVDFVLTFEELAGMMEAKGIAFESLADDKSDF…	[FeFe] Group B	[FeFe] Group B	Evolving	Labile	1	[FeFe]-centre, 2 x [4Fe4S] clusters	None	5.35295	5.02825	2.05943	3.87499	2.82617	1.83925	11.9914	15.3401	5.51642	8.27207	4.10636	3.25196	4.12031	2.32935	3.64846	3.76726	2.99768	1.3825	13.6087	3.14915	4.54164	2.35298	1.432	5.34784	2.74149	3.76158	1.3977	3.69814	7.54635	8.37255	3.42266	3.23436	11.199	11.5596	7.41107	3.56995	19.0835	6.96989	6.45502	4.34613	10.9338
WP_011877994.1	MATVTLTIDNVKVEVEQGSTILDAAKKIGINIPTLCYMKEINAIGACRICVVEVVGARALQAACVTPATEGMVVKTNSAAVRASRKMTLELIQSNHPQECNTCLRNNNCELQALSEAMGLKEVRFIRPSQSHSKDDIDNSSPSIVRDPRKCILCRRCVAVCEKVQGVKCISAVNRGFETTIAPPFNQGLFDVNCTMCGQCTLVCPTGAITEVDDTGKVWRALDDSTKHVVVQTAPAVRVAIAEEFGMEPGTVSTGKLVAALRRLGFDSVMDTDFAADLTILEEGNEFIKRVTEGGVLPMITSCSPGWIKYIEMYYPDLLAHLSTCKSPQQMFGALVKSFYAEKKAIDPANIVSVSIMPCTAKKFEAQRDELRDSGYQDVDIVLTTRELARMLREIGIDW…	[FeFe] Group A3	[FeFe] Group A3	Bifurcating	Labile	3	[FeFe]-centre, 3 x [4Fe4S] clusters, 1 x [2Fe2S] cluster	NADH dehydrogenase, thioredoxin	0.298058	0.0549912	0	0.774999	2.82617	0.459812	0	0	0	4.59559	0	0	0.686718	0	0.521209	0	0	0	0	0	0	0	0	0	0	0	0	0	2.2639	0	0.171133	0	0	0	0	0	0	3.09773	0	0.543267	0
WP_002570913.1	MGFMTIDRIRVEFTDEPNVLSVIRKADIDIPTLCYHSELSIYGACRLCTVENERGKTFASCSEPPRDGMVIYTNTPRLMKYRKMILELLLAAHCRDCTTCIKSGECHLQELAHRMGVTHVGYENTKTQYPIDMSSPAIVRDPNKCILCGDCVRMCDNVQSVNAIDFAYRGTEALVTPAFNKNIAETDCVNCGQCRAVCPTGAISINTNIEVIWEALADPNTKVVAQVAPAVRVAVGDFFGMARGENVMGKIVNVLHRMGFDEVFDTAYGADLTVIEESKEFLERLVSGKNLPLFTSCCPAWVSFCENRYPEFKQNLSTCRSPQQMFGAVIQEYYRNPQKSGGKKLLSVSIMPCTAKKAEILQEESKTNGKADVDYVLTTTELVTMIRKSGIRFENIDIE…	[FeFe] Group A3	[FeFe] Group A3	Bifurcating	Labile	3	[FeFe]-centre, 3 x [4Fe4S] clusters, 1 x [2Fe2S] cluster	NADH dehydrogenase, thioredoxin	4.97248	15.9506	2.05943	3.09999	2.82617	1.83925	6.23553	5.4786	7.35523	2.75736	4.10636	3.25196	18.5414	6.98804	5.7333	1.07636	14.9884	0.460833	7.56041	1.57458	3.63331	6.93511	14.32	16.0435	5.48297	3.22421	5.59079	0	2.2639	3.44752	1.19793	6.46871	3.19972	2.37991	0	4.16495	3.46973	7.74432	6.45502	3.80287	5.14532
WP_014792559.1	MDKINLKIDGIQVSVPKGTTILQAAKEYKVNIPTLCFMQGVHEPGSCRICVVEVEGWRGLQPACVTKVEEGIVVKTAGKLVRETRKELLELILANHNRECLSCARNQKCELQKLAEDFGVSSVSYEKKAARAEMDEWGPIVRDSSKCILCGRCVSICSNTQKVNAIEIAQRGAHTTVTTPYEEALSGRSCINCGQCIKICPVGALQERDDSDKVWSALEDPELHVVVQTAPAVRVALGEEFGLPVGINVRGKMVTALRRLGFDKVFDTTFSADLTIMEEGTELLQRIQQGGKLPLITSCSPGWVKFCEHNFTDFLDNLSSCKSPQQMFGAVAKSYYPQKAGLDPKKIFVVSVMPCTAKKYEADREEMMVQGRKDVDAVITTRELAKMIKQAGINFNDLE…	[FeFe] Group A3	[FeFe] Group A3	Bifurcating	Labile	4	[FeFe]-centre, 3 x [4Fe4S] clusters, 1 x [2Fe2S] cluster	NADH dehydrogenase, thioredoxin, thioredoxin	0.44283	0.243451	0	0.774999	0	0.459812	0.959312	0	0	0	0.684393	0	0	0	0.521209	0.53818	0	0	3.02417	0	0	1.11457	1.432	0	1.24613	0	0	0	0.377317	0	0.342266	0	0	0	1.05872	0.594992	0	2.3233	0	1.6298	0.643165
WP_005836589.1	MAFTSNIMIVRHRLLKELVKLWNNNELVDKIDRLPIELSPRRSKHAGRCCVHKERAVWKYKSLPLLGLDMEDETDELTPLSEYAARALDRAENGRPKDNIMCVIDEACSACVQINYEITNLCRGCTARSCQVNCPKKAVHVKESGQAWIDHDACISCGICHKSCPYHAIVYIPVPCEEACPVKAISKDEKGIEHIDESKCIYCGKCLNACPFGAIFEISQVFDVLHRIRKGEQVVAIVAPSILGQFKTTIEQVYGALKQVGFTDVIEVAQGAMDTVSNEAHELIEKLEEGQKFMTTSCCPSYIELVNKHIPAMKPYVSGTGSPMYYAARIAKEKYPDAKVVFIGPCVAKRKEAQRDEAVDFIMTFEEVASVLAGLDIQMEQAQPYSMSFTSVREAHGFA…	[FeFe] Group B	[FeFe] Group B	Evolving	Labile	1	[FeFe]-centre, 3 x [4Fe4S] clusters, 1 x [2Fe2S] cluster	None	29.005	31.2499	28.3172	0	15.5439	22.071	4.3169	25.2016	16.0896	0.919119	16.4254	21.1377	30.2156	107.15	17.7211	1.07636	125.903	23.9633	28.7296	3.14915	6.35829	8.17353	2.864	5.34784	39.3777	46.2137	41.2321	12.019	16.602	14.2826	0	0	2.39979	0	0	18.4448	0	27.1051	0.430335	8.149	2.57266
WP_008709061.1	MKYINVAEANCKNCYKCLKVCPVKSIKYSNNHVEVLENECILCGRCIRNCPQHAKSLVNDISAIKQAVGEQGAARTADASAGLPPEVFSNVRQGEQGAARVIAALAPSYIASFGAENRFRLAGALHRLGFDAVEETSVGAHAVTKEYARILESDSMDNMITTCCPSVVFLVQKYFPQLTPQLAQVLSPMEAHGEFLRKKYGDDALIVFFAPCISKIEEARVSEKRFIDGVVTFKQLARWFIKEDIELEKCAEGYFGNDPSSSAIYPVFEGIVKDVRANLPEDSHVFNKYTFLSVQGAKDVIELLEEISEGRIHNCFIEASTCYGSCINGPEKPDTEYHPVSTGIDMIRYLRAEKNIREADISSLDLRRHIEPKPLREDIPDEETIRSILAEIGKTKPEH…	[FeFe] Group C	[FeFe] Group C3	Sensory	Labile	2	[FeFe]-centre, 2 x [4Fe4S] clusters, PAS domain	Phosphatase	2.01772	1.87363	9.26745	1.55	1.41309	6.43736	0	0	0.459702	5.51471	0	0	1.37344	2.32935	0	0	0	2.30416	1.51208	0	0.908327	1.23841	0	0	1.99381	0.537368	3.49424	12.019	1.13195	2.46252	0.855666	0.462051	1.59986	0.339987	2.11745	0.594992	0	0.774432	1.72134	2.17307	0.643165
WP_012738474.1	MVNLTINGKAVSVKEGTTILEAAKTIGETIPTLCYLKEVNAIGACRVCVVEVEGTDRCVTACNNFVEEGMVVYTNSRKVRTTRKTNVKLILSQHDYKCGTCIRSGNCALQSIANELNISEMPYDSILEKDNWDKTFPLIRDAQKCIKCMRCVQVCDNIQGMHIWDVVNTGSRTTVNVRANKNIAETACTLCGQCVSNCPVGALTERDDVGIVLDAIENEDIITVVQIAPAVRAAWGEDFGMSKEYATAQRLVAGLRRIGFDYIFDTTFAADMTIMEEGSEFLERLPEIKESGLPMFTSCCPGWVKFVKSEFPEMAGRLSTAKSPQQMFGAITKSYYAEKLGVDPEKIFCVSIMPCLAKKDECTWDGGKDVDAVLTTREVERMFKAFFIKPEELDEDEFD…	[FeFe] Group A2	[FeFe] Group A2	Evolving	Labile	2	[FeFe]-centre, 3 x [4Fe4S] clusters, 1 x [2Fe2S] cluster	NADH-dependent glutamate synthase	32.5078	34.8732	15.9606	10.075	57.9365	6.89717	17.2676	39.446	44.5911	71.6913	16.4254	29.2676	3.43359	34.9402	72.9693	4.30544	80.9375	85.2541	22.6812	17.3203	17.7124	120.745	12.888	44.5653	10.9659	4.83632	37.039	6.47175	14.3381	22.1626	4.6206	12.4754	0.799931	3.39987	9.52852	13.0898	4.77088	19.3608	2.58201	7.06247	15.436
WP_028263961.1	MSNTMRGVYTNLTEIRRNVFREVAAVAYGNAKDETTRLEELPYKIIPGEIATYRESVFLERAIVAERIRLALGLPLQGVDKPAPLTDGIEDALKPETYYEPPLINIIKFACNACADNVYRVTDGCQGCLAHPCREICPKGAISFVDKKAYIDQEKCIKCGRCFDVCPYHAIAHQERPCAAACGMHAISSDKNGHADIDYNKCVSCGQCLVNCPFGAIADKSQIFQVIQAMHYGEEVIAAVAPSFVGQFGGKGNVGKLREAFKQLGFGGVEEVALGADLCSVEEAHMFLEEVPQKQAFMATSCCPAWSVMAKKEFPEHADKVSMALTPMTLTARMIRREHPHAKIVFVGPCSAKKLEAMRKSVRSEVDFVLTFEELAGMMEAKHIDYSSLADDNKSDFNV…	[FeFe] Group B	[FeFe] Group B	Evolving	Labile	1	[FeFe]-centre, 2 x [4Fe4S] clusters	None	7.92746	7.8936	9.7823	7.74999	4.23926	5.51774	11.0321	18.6273	5.51642	7.35295	6.84393	4.87794	10.9875	13.9761	5.7333	2.15272	0	13.825	10.5846	1.57458	5.90413	4.08676	0	3.56523	4.23684	12.3595	5.59079	14.7926	4.52781	5.41753	5.47626	7.39281	7.99931	8.49968	13.7634	5.35493	12.1441	6.19546	15.4921	2.17307	7.71798
WP_010753129.1	MNEIEIFINGQSYYAPEGSTILQAAKANHIEIPTLCYLKEINEIGACRICVVEVAGVKNLVTACVYPIKEGMEITTNSKRVFESRKLTLELILSTHERKCLSCIRSGNCELQKLCKEFNVDDEDYYNGENNNWEFDDTAVHMVRNNNKCILCKRCVAACDKCQAISVIGANDRGFTTHIGSAYELGLGEVACISCGQCIVACPTGAIHERDQTEEVWQALEDPEKYVVVQTAPSIRVTLGEAFDLPIGTNMEGKMVAALRRLGFNKVFDTNVAADFTIVEEANEFLERVNNNGPFPLFTSCSPGWVKYCESYHPELIPNLSSCKSPQQMFGALTKTWYAEKMGIDPSKIFMVGIMPCTAKKFEVTREDESAAGYPDVDVALTTRELARMIDKAGLQFAN…	[FeFe] Group A3	[FeFe] Group A3	Bifurcating	Labile	3	[FeFe]-centre, 3 x [4Fe4S] clusters, 1 x [2Fe2S] cluster	NADH dehydrogenase, thioredoxin	2.40502	2.31216	1.54457	3.09999	5.65234	13.3345	1.43897	0	0	3.67647	4.79075	4.87794	2.06015	0	0	0	0	0.921666	0	0	1.36249	1.60994	1.432	5.34784	3.23994	0.537368	4.19309	8.32082	1.13195	1.47751	0.5134	1.8482	0	2.03992	0	2.37997	0.867433	0.774432	0.430335	3.2596	0
WP_015778292.1	MKESYIDILNIRRMAFEAVAKIAYENRPITDIALEVFDILPGEEARYRENIFRERAVMGERLRMCIGLDARSAADTDAVTEGLDAMDYDRRIYNPPLVSVIKIACEACPENKVTVTDQCHACIGHPCVNVCPKNAVTYTAKGAIIDQDKCIKCGKCVAACPYQAINHQKRPCAESCGVKAIGSDELGRAKIDEDKCVACGRCIITCPFGAISDKSEIYQLIKSLQSDRKVYAIIAPSFVGQFGVNVSPEQIREAIKQLGFDDVIEVGLGADLTTMNEAHEYLEQVPTGKIPFMGTSCCFSWKLMVRNQFPDINDKISESSTPMIYSGKQMKKRDPNCEVVFIGPCISKKLEALEEEVAEVIDFVITYEELLGMFLAKGIEPSEIEVDEPMMDASETGRF…	[FeFe] Group B	[FeFe] Group B	Evolving	Labile	1	[FeFe]-centre, 2 x [4Fe4S] clusters	None	0.655644	0.549255	0	0.774999	2.82617	0.459812	0.959312	4.38288	0	0	0	0	0.686718	0	0.521209	0.53818	0	0	0	0	0.908327	1.23841	0	3.56523	0.249226	1.61211	0	0	0.754635	0.492503	0.342266	0.462051	0	0	1.05872	0.594992	0.867433	0.774432	0.430335	4.34613	0
WP_013823363.1	MQQYFHSVRLDEEKCKGCTNCIKHCPTEAIRVRKGRARIIEERCIDCGECIRICPNQAKLAITDCLEKLKDFKYTVALPAPSFYGQFKPEVTPSQVLSALLALGFHDVFEVALAAEAVSWAIRHYMEVCVDRPRPLISSACPAVVRLIQVRFPSLLEHIIPIESPMEIAGRMAREQACRKTGLEPGEIGTFFITPCPAKVTEVKQPSEGRSSVDGAISMAVVYGALLKRLEMPAPYPVAPRASGVGIGWGRAGGENEAIKAGSLLAVDGIHSVISVLEEIERGGLTDIDYLEAQACTGGCIGGPLVPQNPFVARVRMGNLVKLYPAGEPWDFPRDFDYYRLKTPIPARPALTLAKDPQVALARLEEAERICAELPGLDCGSCGSPSCRALAEDIVQGYA…	[FeFe] Group C	[FeFe] Group C1	Sensory	Labile	2	[FeFe]-centre, 2 x [4Fe4S] clusters, PAS domain	Histidine kinase	0.220925	0.0408539	0.514858	0	0	1.83925	0	0	0	0	0	0	0	0	0	0	0	0	0	0	0	0	0	0	0	0	0	0	0.377317	0	0	0	0	0	0	1.18998	0	0.774432	0	0.543267	0
WP_026894022.1	MSSSFHSVILKDDLCIGCTNCIKGCPTEAIRVRNEKAKIIESKCIDCGECIRRCPEHAKDSVSDSIDELDSFKYKIALPAPSLYSQFGKNTDIGKILYSLKLVGFDHIFEVSRAADIVSDYTQKIVATSSISPLISSSCPVVVRLIQVRFPSLIKHILPLESPMEIAGNIARKEACQRMNLKPSDIGIFFISPCPAKVTSVKNPIGSNHSSVDRVISFKDIYPYILKNLKSCKDTLPFYLSGKAIGWARSGGETYSLGINDYICVDGIENVINILDDIEDHRLTGVRFAELLSCRNGCVGGVLSLENSFIARNLIRQISESFQYANSSQQYNLSKEDIFLTNPILPRKSNIFGDDVSIAMEKMSKVLEIKEQLPGLDCGACGSPSCQVMAEDIVLGETT…	[FeFe] Group C	[FeFe] Group C1	Sensory	Labile	2	[FeFe]-centre, 2 x [4Fe4S] clusters, PAS domain	Histidine kinase	0.196997	0.00940375	0	0	0	0	0	0	0	0	0	0	0.686718	0	0	0	0	0	0	0	0	0	0	0	0	1.07474	0	0	0	0	0	0	0	0	0	0	0	0	0	1.08653	0
WP_015738331.1	MEVEKLLEEALKQKEVTRRTFLKMMAGLGLAGLAGSVGGCLRQHQVAAGGEGWLPYQYDVAGTWPAHVRGRVPIDPNNPSIMRDDRKCVLCGQCLEICHRVQSVYGYYELPIRDDIVCINCGQCSLACPTGAIQERDDTEKVLKALKDPNKFVVVQTAPSIRVALGEEFGMPPGTWVAGKMVAALRRLGFNAVLDTNFAADLTIMEEATELIKRIKGELPGRPLPQFTSCSPGWVKFCEYFYPDLIPHLSSCKSPQQMFGATVKTYYAEKRGIDPRKIVSVSIMPCTAKKFEAQRPEMISAKKYWEKKDPKIAEGVTRDVDIVLTTRELAKLIKQAKIDFPRLPDEDFDPLMGKCTGGAIIFGASGGVMEAAIRTAYFFITGKEPPQQLLDLKPVRGLA…	[FeFe] Group A3	[FeFe] Group A3	Bifurcating	Labile	3	[FeFe]-centre, 2 x [4Fe4S] clusters	NADH dehydrogenase, thioredoxin	0.385218	0.156478	0	0	0	0.919623	0	1.09572	0	0	4.79075	0	0	0	0	0	0	0	1.51208	0	0	0.123841	1.432	0	0.498452	0	0	0.924536	0	0.492503	0.171133	0	0	0	0	0.594992	1.30115	0	0	0.543267	0
WP_028085756.1	MMRGINTTVRRLRRKVFEEVAALGFKADADTLCDDMEAIPYALVNDETEQYRDSVYRARAVVREQVRLAMGLSLRPEDKPVHLTAGVEASNISDKYYEPPLMQVIPSACMRCEAKGYEVSNMCKGCLAHPCMEVCPKGAISMVNGKSHIDQEKCIKCGKCKSVCPYDAISKKERPCAKACGVNAIESDKMGRAYVNPDKCVSCGMCMVSCPFGAISDKSQIFQLARALSEGEQIIAEIAPAFTGQFGDNINARNLKAALEELGFSQVYEVALGADIGAVAEAHHYVEKVATGELPFLLTSCCPSWAMLAKKYFPDMIDEVSQELTPMVATARTIKKEHPNAKVVFIGPCAAKKLEAMRRTVRSDVDFVVTFEELQGMFDAKGIDLSEYEAESSFHNATG…	[FeFe] Group B	[FeFe] Group B	Evolving	Labile	1	[FeFe]-centre, 2 x [4Fe4S] clusters	None	92.0543	108.896	55.6047	46.4999	26.8486	97.4801	96.8905	78.8919	96.5373	38.603	115.662	69.9172	210.136	107.15	61.5027	76.9597	41.9676	64.9774	52.9229	94.4746	107.183	50.7749	38.6641	58.8263	68.0387	97.2637	77.5722	183.983	77.35	69.4429	65.544	266.141	109.59	195.493	111.166	130.303	155.27	128.556	126.518	65.192	118.342
WP_015724294.1	MMKTKTAALTIDGRKVAIEGEKNLLELVRKAGIDLPTFCYHSDLSVYGACRLCLVDVEGRGILGACSTPPEPGLVVRTNTEELREIRKISVELLLANHDRECTSCVRSGSCQLQDIARRLGITKIRYRSIHQPKPVDTSSPSLIRDPNKCVLCGDCVRFCDEIQSIGAIDFAFRGHDAMVLPAFGHDLGTTECVNCGQCASVCPTGALAPASEIDAVWKAIHDPNTVVVAQIAPAVRVAIGEQFGLEYGLNTTGQVVAAMKRMGFNIVYDTSFTADLTVVEEAGEFMARKTNGERLPLFTSCCPGWVKFAEQYFPQLLGNLSSCRSPQQMMGSMVKHTLPAQLGRERKDVVMVSIMPCTAKKFEAKRPEFKTGGSPDVDFVLTTQELARMIEESGLSLN…	[FeFe] Group A3	[FeFe] Group A3	Bifurcating	Labile	3	[FeFe]-centre, 3 x [4Fe4S] clusters, 2 x [2Fe2S] cluster	NADH dehydrogenase, thioredoxin	0.326731	0.123594	0	0	0	0	0	1.09572	0	0	2.73757	0	2.06015	0	0.521209	0	0	0	0	1.57458	0.454164	0.247683	0	0	0	0.537368	0.698849	0.924536	1.50927	0	0	0	0	0	0	0	0	0	0	0.543267	0
WP_007049858.1	MINLTVDNIEVKVKEGTTILEAAKKAKIEIPTLCYLKDLNRPASCRMCMVDVGGKLLPACVTHASEGMEVKTHTKRLRNIRKTILELTLANHNCECTTCEKSGNCKLQTMANKYLTGPGEFEVEFEKGIDNSFSAVTRDLSKCIKCNRCVSMCSDKVGASAISLINRSEETTVATPFNIPIIHSDCIGCGQCITVCPTGALIERGTTEEIYDLLGEDTYYNICLLSHGTYETLAEGVGVDNALMKAKVVDVLNKLGFSEVIDYEEYLIKEMNAVAYLLKENMLEGKPLIYSCSSGIRREIEDVYPEADDLFVNLSKIRKDINTRFKEGYLDRNIDKDVHLTRVENCTAFLPETNETSGIDISITTRQLAKLIKTSGIDLNKADNKPLDNLDYTGVFNPY…	[FeFe] Group A3	[FeFe] Group A3	Bifurcating	Labile	3	[FeFe]-centre, 3 x [4Fe4S] clusters, 1 x [2Fe2S] cluster	NADH dehydrogenase, thioredoxin	1.42822	1.37299	0.514858	0.774999	0	0.919623	0	0	1.3791	0	0	1.62598	0	0	2.08484	1.07636	2.99768	0	4.53625	0	1.81665	0.495365	0	1.78261	0	1.61211	1.3977	11.0944	1.50927	2.95502	0.342266	1.8482	0.799931	0	1.05872	1.18998	0.433716	0	3.01234	0	0
WP_016308760.1	MGKATVIPFGPQHPVLPEPLHLDLVVQDETVVDVLPQIGFVHRGLEKLVETRDYNQFIYIAERICGICATGHSIGYAETVESLMGVEIPKRAEYLRIIWHELSRVHSHLLWLGLAADAFGFESMFMHCWRLRERVLDLFEKTTGGRVILSVVKVGGVVRDIDATQMAEIIAVLDGLKDDYTKIMNTLLTDASVKNRTVGVGHISTEDARSLSMVGPFARASNLPYDVRSFGKGAYGDLADFQPIVATEGDCYARVKVRCLEVLQSIEIIKELAAKIPAGDIEVAVKGAPADGAQASNVLEQPRGECYYYARGNGSKNLERMRIRTPTSQNLAGMTVALKGCDLADVNMIILTIDPCISCTER	[NiFe] Group 4e	[NiFe] Group 4e	Evolving	Sensitive	6	[NiFe]-centre, 1 x [4Fe4S] clusters	NuoL, NuoH, NuoC, [FeS] protein	0.251916	0.0198361	0	0.774999	0	0	1.91862	0	0.459702	0	0	0	0	0	0.521209	0	0	0	4.53625	0	0	0	0	0	0	0	0	1.84907	0	0	0	0.462051	0	0	0	0	0	0	0	0	0.643165
WP_004064152.1	MKVMNELLNTADKLIYTNDKCTGCNKCVRVCPTLVSNIAQEGKIWVNRDSCIACGACLDACGHDARSYHDDTQQFFSDLKSGRKISVIIAPAFLANYPKEYKRVLGYLKSLGVNHIYSVSFGADITTWGYLKYITENNFKGGISQPCPAVVDYVEKYIPELLPRMMPVQSPMMCMAIYIKKYLKLTDDLAFISPCIAKKVEIEDKNNHGYVKYNVTFLKLMQHIGRDYTKSPEYTDELEYGLGSLYPMPGGLRENVEHFLGKEQVVRQVEGEREAYHYLQEYLKRVKSKAQLPLMVDILNCSKGCIYGTATDPAKNTDDVLLTLSKMRAMDKQEIHGKGPFRKTNKSPWSQQSTPKERMANLMEAFHELNLTDFIRKYDTSKQIKVNEPSAGELDEIYR…	[FeFe] Group C	[FeFe] Group C2	Sensory	Labile	1	[FeFe]-centre, 2 x [4Fe4S] clusters, PAS domain	Fusion with methyl-accepting chemotaxis protein	34.9697	94.032	14.9309	9.29998	43.8057	11.0355	18.7066	24.1059	40.4537	11.0294	30.7977	87.8029	1.37344	20.9641	38.0483	103.331	50.9606	66.3599	28.7296	40.939	94.9202	42.3537	28.64	82.0002	26.9164	14.5089	31.4482	8.32082	7.16903	81.263	25.8411	14.3236	28.7975	71.7373	76.2281	42.2445	2.6023	17.0375	2.15167	10.3221	27.6561
WP_010876915.1	MIHLSERIVISPTSRQEGHAELVMEVDDEGIVTKGRYFSITPVRGLEKIVTGKAPETAPVIVQRICGVCPIPHTLASVEAIDDSLDIEVPKAGRLLRELTLAAHHVNSHAIHHFLIAPDFVPENLMADAINSVSEIRKNAQYVVDMVAGEGIHPSDVRIGGMADNITELARKRLYARLKQLKPKVDEHVELMIGLIEDKGLPKGLGVHNQPTLASHQIYGDRTKFDLDRFTEVMPESWYDDPEIAKRACSTIPLYDGRNVEVGPRARMVEFQGFKERGVVAQHVARALEMKTALARAIEILDELDTSAPVRADFDERGTGKLGVGAIEGPRGLDVHMAQVENGKIQFYSALVPTTWNIPTMGPATEGFHHEYGPHVIRAYDPCLSCATHVMVVDDEDRS…	[NiFe] Group 3a	[NiFe] Group 3a	Anaerobic Uptake	Sensitive	3	[NiFe]-centre, 3 x [4Fe4S] clusters	F420 reductase	0.175527	0.00705281	0	0.774999	0	0	0	0	0	0	0	0	0	0	1.04242	0	0	0	0	0	0	0	0	0	0.498452	1.07474	0	0	0.754635	0	0	0	0	0	0	0	0	1.54886	0	1.08653	0
WP_022865058.1	MAEKVVIDPLTRIEGHLRIEMETEGEQIKKAWSVSTQFRGIETIVQNRDPRDVWAFVQRICGVCTSVHAIASITAVEDAIGSNPPENARLIRSLVLGSQEIQDHVIHFYHLHALDFVNVPNAAKADPAKALEFAHSIGSKWRGNNLKRFTEVRDTVKKILESGQLSVFTGGYWDHPDYRLPPEADLMCVAHYLDALEFQRSMIRINTVFGGKNPHPNFLVGGMACSIDPQSSESINQVQMDQVKTWVEEINEFVKDCYYPDILALGGVYKDYFDIGATHPNYLAVGLAGSMFAGDPNKSRLSSPHTAIKPGVIFDDDLTKVHPFDPHKIEEFITSAWYEYSVGDKKGLTPDKGETTVKYTGPQPPFKWLGDRDKYTWSKAPRYDGKPMQVGPVARMLLA…	[NiFe] Group 1f	[NiFe] Group 1f	Anaerobic Uptake	Unknown	3	[NiFe]-centre, 2 x [4Fe4S] clusters, 1 x [3Fe4S] cluster	Cytochrome b	0.2727	0.0422004	0	0	0	2.29906	0	0	0	0	0	6.50392	0	0	0	0	0	0	0	0	0	0	0	0	0	0.537368	0	0	0	0	0	0	0	0	0	0	0	0	0	4.8894	0
WP_022790212.1	MAKRSIIPFGPQHPVLPEPIHLDLVLEDEVVVEAIPNIGFVHRGLEKLVETRDFKQYVYVAERVCGICSFGHGLGYCESVEHVMHIDVPKRARYLRTLWMELSRIHSHLLWLGLLADALGFEALFMQSWRLREKVLDIFDNTTGGRIIFSVNQIGGVLKDIDASMLKEIDTILYDMETDLKPIMDTFLEDMLVNSRLRGLGVLSKEQAYLAGAVGPMARASGIDYDSRETGYAAYADLNFGPITATEGDCYARCKVRLAEILQSFEILHELISKIPGGDINVPVKGNPNGECFIRIEQPRGEAIYYTKGNGTKYLDRFRLRTPTTSNIPPMLDLLKGCQLGDVPLLILTIDPCISCTER	[NiFe] Group 4e	[NiFe] Group 4e	Evolving	Sensitive	6	[NiFe]-centre, 1 x [4Fe4S] clusters	NuoL, NuoH, NuoC, [FeS] protein	1.26442	2.0398	7.72287	0	1.41309	2.29906	0.479656	0	0	0.919119	0.684393	3.25196	1.37344	0	0	0	0	0	0	0	0.454164	0.247683	0	0	1.74458	1.07474	1.3977	9.24536	0	0	0.171133	0	7.99931	1.01996	0	0	1.30115	0	0	4.34613	0.643165
WP_008410059.1	MSGKITINGQVIDFTDEKNILSVARKAGIEIPTLCYHPELTIAGACRLCVVEIERMGIQASCSTAPVDGMVVYTNSERVNRVRKMVLELLLANHDRECTTCESSGACKLQKYASDYGIKRLRYPGRTAPAPLDTSSLSVVRDPNKCILCGLCVRVCKEIQGIGVWDFKNRGSRTEIVAAMDQPLAESACINCGQCIAVCPCGALTSNSTAIDEVWAAIRNPKKTVICQIAPAPRAALGEEFGLGSVDVTKKIVAALRKIGFDKVFDTVFTADMTTIEEANEFLSRLVKGEKLPLFTSCCPGWVKYAEQFHPELLNNLSSCRSPQQMFGSLLKKKYAKELGIAPQDMFVVSIMPCTAKKYEAKRPEFMTEGAYDVDAVLTTVEAARMFREAGIIFSSLAD…	[FeFe] Group A3	[FeFe] Group A3	Bifurcating	Labile	3	[FeFe]-centre, 3 x [4Fe4S] clusters, 2 x [2Fe2S] cluster	NADH dehydrogenase, thioredoxin	0.277508	0.116014	0	0	0	0	0	1.09572	0	2.75736	0	0	0	0	0.521209	0	0	0	1.51208	0	0	0.619207	0	1.78261	0.747678	1.07474	0	0	0	0	0	0.462051	0	0.339987	0	0	0.433716	0.774432	0	0	0.643165
WP_009609830.1	MTYFHSVTLDKDRCRGCTNCIKRCPTEAIRVREGKARIINERCIDCGECIRVCPYHAKLAVTDSLEIMKNFRYKIALPAPSLYGQFKDLSINQILSALLDIGFDEVFEVAYAAEIVSKFTREALQKGNLKKPVISSACPAVVRLIQIRFPSLIDHLLNICSPMDTAAIIAKKQAVKKTGLKEEEIGVFFISPCAAKVTSIRNPVGLEKSKIDGAFSMKEIYGKILEKAKTTVVRDLSKATMIGVGWANSGGEAFGTFTENSIYVDGIHNVIDVLEEIELGKLSDLDFFEGLACIGGCIGGPLTVENPFVAKNRIRKLAESLPKREQPPVDEDLVSFEEVKWIKKIEKSEVMKLDKDISKALEMMKEIDRTHKTLPGLDCGSCGSPSCRALAEDIVKGCA…	[FeFe] Group C	[FeFe] Group C1	Sensory	Labile	2	[FeFe]-centre, 2 x [4Fe4S] clusters, PAS domain	Histidine kinase	0.518393	0.477606	0.514858	0	0	3.21868	0.479656	0	1.3791	1.83824	0	1.62598	1.37344	0	0.521209	0	0	0.460833	0	0	0	0.371524	0	0	0.249226	0	0	0.924536	0.377317	0	0	0.462051	0	0	0	0	0	0.774432	0	1.6298	0
WP_013931427.1	MKIIVNGKEITVNNNARNLLEALREVGIEIPNLCYLSEASIFGACRMCLVEVDGNIVTACTTPLKEGMVVKTHTPEIYELRRAILELLLASHNRDCTTCERNGNCKLQKYAEEFGIREVRFEKLSKNNIIDYSSPIIRDNSKCILCGDCVRACEEIQGVAAIDFAYRGFEAQVVPAFEEKLANTECVFCGQCAAYCPTGALTFRNDVEKVYKALKEGKYVIGMIAPAVRSAIQEEFDLGDDYVTAGRLVSILKMVGFKKVFDVSFAADLVAYEEAHEFLERIEKGEKLPLFTSCCPAWVKFAEQFYPEYLSHISSVKSPQQALGTVIKKYYAKEIGVRLEDICLVSIMPCTAKKFEAEREEHAGIVDVVLTTRELALFIKSTGINIKTVEPMPFDRPYG…	[FeFe] Group A3	[FeFe] Group A3	Bifurcating	Labile	3	[FeFe]-centre, 3 x [4Fe4S] clusters, 2 x [2Fe2S] cluster	NADH dehydrogenase, thioredoxin	0.398553	0.202291	1.02972	0	0	1.37943	0	0	0	0	0	0	2.06015	2.32935	0.521209	0	0	0	0	0	0.908327	0.619207	0	0	0.249226	0	0.698849	2.77361	0.377317	0	0.171133	0.462051	0	0.339987	0	0	0	0	0	0	1.92949
WP_015925729.1	MSIIQFKEANCKNCYKCIRSCPVNAIAFKNDQAEIIHDECMLCGNCLTVCPQNAKSVNSDVQKVKKFIQKREKVYVSLAPSFISAFDHDEKWVYYALKKLGFTHVEGTANGAYQVSRQYESLLKQRKMKNIITSCCSSIILLIEKYYPQLLDQLAPVVSPMIAHAKMLRETYGQRIRVVFIGPCISKKEEFDDLQNGNQIDAVLTFDDLDKWFEEEGLYESDEPIVGIKNFDTSARIYPIPGGILKTIDRKYKKNYRSISVDGVERCMDVLQSILEGDIENYFIEMSSCKGGCLGGPYMKNVPGGFLTARERLLNYAKRTGIKTETDLTSSVMALTKVDLSKKFIDRSKKLEIPSEAVIQGILNSIGKFSKDKELNCGACGYHSCREKAIAVFHGKAQV…	[FeFe] Group C	[FeFe] Group C3	Sensory	Labile	3	[FeFe]-centre, 2 x [4Fe4S] clusters, PAS domain	Phosphatase, thioredoxin	0.219783	0.0502401	0	0	1.41309	0	0	1.09572	1.3791	0	0	0	0	0	0	0	0	1.84333	0	0	0	0	0	0	0.249226	1.07474	0	0	0.377317	0	0	0	0	0	0	0	0	0	0	0	0
WP_012635578.1	MSDKVNITLDGKSLTVDKDKTILEVAREAGIKIPTLCYLEEINEIGSCRVCVVEVNGKIQPACVTPVSEGLEITTTSPRIREARRISLELIISDHPMECLTCSRNGNCELQRLAEDFGISEITYEGEQSHFEPDLSSPSIVRDPDKCILCRRCVSVCEQVQGVAALTPNERGFSTIITPAFGQKLGEIACANCGQCINACPVGALSEKDDTEKVWEALANPDKHVVVQTAPAVRVSIGEVFGMKPGSLVTGKLMAGLRRLGFDKVFDTNFTADLTIMEEGHELIERLKNNERLPLITSCSPGWIKFIEHFYPSYLEHISSCKSPQQMFGALAKTYYPENNGIDPEDVFVVSVMPCTAKKFEITRPGMDSSGYQDVDVVLTTRELAKMFKQAGIDFVNLP…	[FeFe] Group A3	[FeFe] Group A3	Bifurcating	Labile	3	[FeFe]-centre, 3 x [4Fe4S] clusters, 1 x [2Fe2S] cluster	NADH dehydrogenase, thioredoxin	0.458616	0.311918	0	0.774999	1.41309	0	0.959312	1.09572	0	0	0	0	0	0	1.04242	0	0	0	0	0	0	0.371524	2.864	0	0.249226	0.537368	0	0	0.377317	0.492503	0	0	2.39979	0	0	0.594992	0	0	3.44268	0.543267	0
WP_013625216.1	MGERTIIPFGPQHPVLPEPLHLDLILEDEKVVGAVPSIGFVHRGLEKLVEKRDFNEMAYVIERVCGICSFMHGQGYVQTVEGIMGVEIPDRAKYLRTIWAELSRIHSHLLWLGLMADAFGFESLFMHCWRVREKVLDIFEETTGGRVIFSVCKVGGVWKDIDNDTLKRIVNVLKVVETETKELTKVFVKDFTVQKRTKGVGVLTYKEAFELGAAGPVARGSGIAMDLRKLGYAAYSDLSFEPIVEKDGDCYARCNVRIGELFQAIDLIRQAVERIPDGEIEVKVKGNPPKGEYMSRLEQPRGQVVYYARGNGTKFLDRVRVRTPTFANIPPLLKMIPGSDLADIPILALTIDPCISCTER	[NiFe] Group 4e	[NiFe] Group 4e	Evolving	Sensitive	6	[NiFe]-centre, 1 x [4Fe4S] clusters	NuoL, NuoH, NuoC, [FeS] protein	0.316355	0.156197	0	0.774999	0	0.919623	0	0	0.459702	0.919119	0	0	1.37344	0	0	0	0	0	0	0	1.36249	0.619207	0	0	0	0	0.698849	0.924536	1.88659	0	0.171133	0.462051	0.799931	0	0	0	0.433716	0.774432	0	0	0
WP_011393383.1	MIYIDRDLCTGCRRCAEICPTGAIEGNQGEPQIINREICVNCGQCVQICSAYASPYTTSPETMAAKNRERRLLPAAAPEPLFAAYNESHEELVREALARPDLFNAVQFAPAIRFALAEDFGLSPQVVTVGRIVAALRRLGFKYVYDTNFAADLTVMEEGYELLQRLQGDGALPLFSSCCPAWVKFVEQAYPQLIANLSTCKSPQQMAGAIFKTYTGQLDPDLRSRHLFVTAVMPCIAKKFECNRPELGGSYGRDVDAVLTTRELAHLIKDKGIDWHSLAEEEPDQPLGEYSGAGAIFGVTGGVTEAVLRTAAEVVGGKPLEEIEFHEVRGMAGTRKVNINLGKEQLEIIIVAGLKNVVPILDDLIAGKASFHFMEVMACPAGCLSGGGQPKILVETYRG…	[FeFe] Group A4	[FeFe] Group A4	Bifurcating	Labile	6	[FeFe]-centre, 2 x [4Fe4S] clusters	NADP dehydrogenase, four FeS proteins	0.436793	0.196381	0.514858	0	1.41309	0	0	0	0.459702	0.919119	0.684393	0	1.37344	0	0	0	0	0	0	0	1.81665	0.123841	0	7.13046	0.996904	1.07474	0	0	0	0.492503	0	0	0	0	0	0	0	0	0	0	0
WP_007060145.1	MKMVNLTINDIKVSVPEGTTILDAAKKVNINIPTLCYLDLHDIKMVNRTSSCRVCLVEVEGRRNLAPSCSTEAFEGMIVKTNSPRAIKARRTMVELLLSDHPTDCLVCEKNTQCQLQLIAAELGIRKIRYKGAMSNYKKDSSSGAIYRNLDKCIMCRRCETMCNEVQTCQVYSAVDRGFETVVSPAFGRPMLDTQCTFCGQCVSVCPTAALTEVSNVAKVWEVIADPDKYVVVQTAPAIRVALGEKFGMEPGTIVTGKMVAALRRLGFDKVCDTDFAADVTILEEAHEFIDRLQNGGRLPILTSCCPSWVKFIEHQFPDLLDIPSTCKSPHIMFGTLAKTYMAEKLNIDPSKIVVVSVMPCIAKKYEISRPELEHEGEKNVDLVVTTRELADMIMEAGI…	[FeFe] Group A3	[FeFe] Group A3	Bifurcating	Labile	3	[FeFe]-centre, 3 x [4Fe4S] clusters, 1 x [2Fe2S] cluster	NADH dehydrogenase, thioredoxin	0.645378	0.611551	1.02972	1.55	0	0.459812	0.959312	1.09572	0	0	0.684393	0	0	0	0.521209	0.53818	0	0	0	0	0	0.247683	0	0	0.996904	0	0.698849	0	0.754635	0.492503	1.19793	1.38615	0	1.69994	1.05872	1.18998	0.433716	0.774432	0.86067	1.08653	0.643165
WP_006566021.1	MSKHLPVDVRVPIDSDNPSIMRHEEKCIKCGQCKNICKDYISVLGTYSLAETKDRAVCINCGQCANVCPVESITETYEYQQVREAVKDPEKIVIVSTSPSVRAALGEEFGTEEGMFVQGKMVALLRALGADYVLDTNFSADLTIMEEASELIERITKGTKPLPQFTSCCPAWVKFAEIYYPELLDHISTAKSPIGMQGPTIKTYFAKLMGIDPEKIVNVALTPCTAKKFEIRREEMKDAGISYGKEDMRDMDYVITTREAALWANEEKIDFMGLEDSDFDKFMGEGSGAGVIFGNSGGVMEAALRTAYEFITKEKAPDILYDLKPVRGMEGVKEASLDIGDLTVNVAVVYGTGNARKMIDKVKSSDKQYHFIEVMTCPGGCIGGGGQPKDKEFKGQIIQ…	[FeFe] Group A1	[FeFe] Group A1	Evolving	Labile	1	[FeFe]-centre, 2 x [4Fe4S] clusters	None	226.246	260.022	178.656	169.725	193.593	209.674	236.47	190.655	199.97	204.963	203.265	230.889	312.457	246.911	204.314	206.123	194.849	225.347	300.904	190.524	252.061	190.716	173.272	262.044	147.293	192.378	175.411	354.097	161.869	302.889	178.834	241.653	274.376	369.226	285.855	252.872	285.819	176.571	269.39	165.696	230.253
WP_021434166.1	MSLVNLTINGKNISVENETTILDAAKNLNIKIPTLCHLHMDEINMHNKCASCRVCMVDTKRGLVPACATNVKEGMEVQTNTPRALNARRTVVELLLSDHPQDCLVCDKNGNCELQTIAHDLGVRNISYQGEKTNLGIDNSSKSIVKNHDKCILCRRCETMCSEIQKVGVLSGVNRGFETMVSTFFNEDMAKTNCSFCGQCVAVCPTGALSEVNNIDLVWDEINNPKKTTVVQVAPAVRVALGEEFGLAPGTITTGKMVSALKLLGFTYVFDTNFAADITILEEASEFINRLKENKNLPILTSCCPAWINYLEHHYPECLNLASSCKSPQNMFGAIAKNYFTSKINISPKDITVVSVMPCIAKKYEVSRTELGNDGILDVDVSITTRELAKMIKESGIDF…	[FeFe] Group A3	[FeFe] Group A3	Bifurcating	Labile	3	[FeFe]-centre, 3 x [4Fe4S] clusters, 1 x [2Fe2S] cluster	NADH dehydrogenase, thioredoxin	2.70227	2.9324	3.60401	0	0	0.459812	2.39828	20.8187	1.3791	5.51471	0.684393	3.25196	2.74687	0	0.521209	0	0	0	1.51208	3.14915	3.17915	0.247683	0	0	0	0	0	0	0	2.46252	0	3.23436	36.7968	9.17966	0	1.18998	13.8789	15.4886	0.430335	3.80287	0
WP_003514900.1	MKTLENHNRIKVTVNGREIEVYDNLTILQALLQEDIHIPHLCYDIRLERSNGNCGLCVVTLISPDGERDVKACQTPIKEGMVICTNTPKLENYRKIRLEQLLSDHNADCVAPCVMTCPANIDIQSYLRHVGNGDFEAAIRVIKERNPFPIVCGRVCPHTCESQCRRNLVDAPVAINYVKRFAADWDMARPEPWTPEKKPPTGKKIAIVGAGPSGLSAAYYSAIKGHDVTVFERQPHPGGMMRYGIPEYRLPKAILDKEIEMIKKLGVKIMTEKALGIHIRLEDLSKDFDAVYLAIGSWQATPMHIEGEKLDGVWAGINYLEQVAKNVDIPLGDNVVVIGGGNTAIDCARTALRKGAKSVKLVYRRTREEMPAAPYEVEEAIHEGVEMIFLMAPTKIIVK…	[FeFe] Group A1	[FeFe] Group A1	Evolving	Labile	1	[FeFe]-centre, 3 x [4Fe4S] clusters, 1 x [2Fe2S] cluster	None	5.73309	10.4936	7.72287	3.09999	0	9.19623	3.35759	4.38288	5.97612	1.83824	5.47514	3.25196	10.3008	0	6.25451	1.61454	11.9907	5.06916	4.53625	3.14915	4.08747	6.56359	10.024	12.4783	6.97833	3.76158	4.19309	5.54721	2.64122	6.40254	4.27833	8.31691	4.79958	3.39987	6.35234	5.35493	2.16858	0	3.87301	5.97593	5.14532
WP_006874783.1	MNDVLSLKKANCKNCHKCIRSCPVKSIRFSDNQAKIIPEECILCGRCVVVCPQNAKRVRNDLTEVIGAIGSGKRVIAALAPAFISEFPVSGIEEMEELLKKFGFFAAREVAQGAYIVKSDYERMIREKTQDVIISSCCHTVVTLIQKYYPAVIPYIAPIISPMMACARQIKQEYPDAYVVFIGPCISKKDEMEKLPGYVDCVLTFDELWQWFEKRGIVLQKQEVDAQGGRASRFFPRTGGIIACMHTEESTYKYIAVDGVENCVQAIKEIERGGLKGYFVEMSACEGSCINGPSTRAYRDNILTSRARVDEYAQPDMHQKPDFDAACEFGLSRHIANEFVHEPEPPEATIIEILARMGKTRPEHELNCGSCGYPTCREKAKAVYNGKADITMCLPYLLE…	[FeFe] Group C	[FeFe] Group C3	Sensory	Labile	3	[FeFe]-centre, 2 x [4Fe4S] clusters, PAS domain	Phosphatase, thioredoxin	2.86049	3.0097	6.1783	5.42499	4.23926	5.51774	2.39828	0	1.3791	0	1.36879	4.87794	2.74687	0	4.16967	0	0	2.765	4.53625	0	0.908327	1.98146	2.864	0	3.23994	3.22421	4.19309	6.47175	1.88659	1.47751	2.567	0.462051	0	0	0	0.594992	2.6023	2.3233	0	3.2596	0
WP_016147589.1	MVNVTINGITVSVPEGTTIKAAAAQAGIVIPTLCYLKDLNEIGACRVCCVEVEGERRMVTACNNPVREGMVVHTNSPRARETRRVNVELILSQHDCHCATCVRSGNCKLQELANDLGILVNPYEEDLPHGIHAMWTTTFPLYRDAKKCIKCMRCVQVCEKMQSLGIWELTGSGGRSTIDVSYNRRIKDADCALCGQCITHCPVGALRERDDVQRALDALADPDIVTVVQIAPAVRAAWGEAFGLAPEQATVARLTAALRRMGFDYIFDTTFSADLTIMEESAEFLERLKSGALRNGPMFTSCCPGWVRFLKSQYPDMTALLSSAKSPQQMFGATAKTWFAKKIGVDPKKLFCISIMPCLAKKSECDLSTMQNEDYGKDVDLVLTTREVDRMLRADQINV…	[FeFe] Group A2	[FeFe] Group A2	Evolving	Labile	2	[FeFe]-centre, 3 x [4Fe4S] clusters, 1 x [2Fe2S] cluster	NADH-dependent glutamate synthase	8.77645	12.4866	8.23773	9.29998	9.8916	6.89717	4.3169	9.86149	6.89552	9.19119	10.2659	11.3819	41.8898	6.98804	4.16967	2.15272	14.9884	9.67749	10.5846	1.57458	4.9958	12.7557	18.616	1.78261	10.2183	11.2847	5.59079	3.69814	6.79171	3.44752	9.75459	7.39281	6.39944	2.37991	7.41107	5.94992	3.03601	17.0375	3.44268	20.6441	7.07481
WP_005338995.1	MVNLTIDGRQISVEENTTIMEAARSVGIQIPSLCYLKGINEIGACRVCVVELEGKDRLITACNNICKEGMVIYTNSPKVRKDRRTTVELILSEHDCQCVTCMRSGNCSLQKIANDLDIIELPFHQYLEHQPWDKTFPLIRDSAKCIKCMRCVQVCDKVQGLGVWDVEGTGYHTTVNVSGHNSIREADCALCGQCITHCPVGALRERSDTNEVWKAIEDPDKIVVAQVAPAVRAAWGEELGLAPEDATVGKIIDALKRMGINYVFDTTFSADLTIMEEGNEFVKRFTSGELKDRPMFTSCCPGWVRFIKSQFPHLVKYLSSAKSPQQMFGAVMKTYFAEKLGVSPEKIYTVSVMPCVAKKAEREMDLYYEEYAGHDIDAVITTRELIRMIRSAHISPQTL…	[FeFe] Group A2	[FeFe] Group A2	Evolving	Labile	2	[FeFe]-centre, 3 x [4Fe4S] clusters, 1 x [2Fe2S] cluster	NADH-dependent glutamate synthase	26.2434	35.4443	14.416	16.275	19.7832	33.5662	44.608	33.9673	53.3254	7.35295	27.3757	24.3897	4.12031	6.98804	22.9332	26.909	11.9907	16.1292	61.9954	29.9169	18.1665	11.1457	8.59201	28.5218	12.4613	38.6905	13.2781	30.5097	14.3381	38.9077	30.2906	40.6605	22.3981	14.9594	19.057	39.2695	33.8299	26.3307	43.8942	24.447	52.0963
WP_013708694.1	MVKLTIDGRDVEVAEHTTILEAALAAGIRIPTLCYLKNLNEIGSCRVCVVEVEGIDQLVAACNNYVLDGMVVHTNSPSVRIARKVNVEFLLSQHDSECTSCVRSGNCSLQTLSNDLGIAQLPFDKHLAGEHWNLSFPLIRNNDKCIKCMRCIQVCDKVQATGVWDITNRAGHTMVNTVGGKPIEETGCSLCGQCITHCPVGALRERDDTEQVFDALGDPERICLVQIAPAVRTAWGETFGLAPGQATVERLAAALRMVGFDYIFDTSFSADLTIMEEASELLERLKRAGESGEHPTFPMFTSCCPGWVRYVKDHYPELVDQLSTSKSPQQMFGAIAKTYYAQALGVDPSKIFSVSIMPCVAKKAEAALPSMTGADGAPDVDVALTVREVCRMVKACHID…	[FeFe] Group A2	[FeFe] Group A2	Evolving	Labile	2	[FeFe]-centre, 3 x [4Fe4S] clusters, 1 x [2Fe2S] cluster	NADH-dependent glutamate synthase	1.60051	1.69003	0.514858	0.774999	0	1.83925	1.91862	0	1.83881	1.83824	2.05318	1.62598	8.24061	0	2.08484	2.15272	0	1.3825	1.51208	0	0	1.73378	1.432	0	1.49536	1.61211	0.698849	4.62268	1.13195	0.492503	0.5134	3.69641	0	0.339987	3.17617	0.594992	0	10.0676	1.291	2.71633	1.92949
WP_006190671.1	MQTIEDFYREALKKATGREEFEYDPEQLNCLFHPTVHEPVWDEEKLSDEGQKKALTKDARAVLEDVLAGKRAGRKAYILLAPAFLGQYHDVKTGQIRNAFRKMGFDGLVEVALFADILTLKEALEFDRNIQSESDYMLTSCCCPMWVAMIKKSFRHLMPHVPPSVSPMIAAGRTVKKLYPDALTVFLGPCMAKKTEAKDPDLVGAIDHVLTFQECKDIFDRLGIHPQDQSDKKRVYSSEAGRIYAYAGGVSQAVQMTLDRLSPERAIKVRSRHANGVAECKQMLNDLMEGEVKANFFEGMGCAGGCVGGPKKLIPQEEAKEHVKAYGKRSPYRTPLDNPYVLELLTRLGFYTLEGLLYDETFFSRKRFA	[FeFe] Group B	[FeFe] Group B	Evolving	Labile	1	[FeFe]-centre, 2 x [4Fe4S] clusters	None	0.269804	0.0963051	0.514858	0	2.82617	0	0	0	0.459702	0.919119	0	1.62598	0	0	0.521209	3.22908	0	0	0	0	0.454164	0	0	0	0.249226	0	0	0	0.377317	0.492503	0.342266	0	0.799931	0	0	0	0	0	0	0	0
WP_012374366.1	MIKARINQLDVEVPEGTSILDAARQVHVKIPTLCKHRDLLPTAACGICIVRNKGGNKLIRACCTPLEEGMEITTHDSDIVDVRRATLELILSNHPQACLTCGRNGECELQTLAADFNISMETIKRYVKDVPPDRSTNCIVLDFTKCIKCGRCIQVCQEMQNVWALSFLDRGINTRMAPAGDITLAESPCVKCGQCSAHCPTGAIVEKDETATVWSALRDEDKICVVQIAPSVRVTVGEAFGLPPGTNLTKKLYSALRRLGFKAVFDTNFAADVTIVEEASEFVERFAHKRGPLPLITSCCPSWTDHMEKRHYDFIDNFSTAKSPQQMLGVLAKTYYAQKAGVDPSKLFMVSIMPCTAKKYELSRTEEMHASGFADVDVVLTTRELARMLKQSGIEFLAL…	[FeFe] Group A3	[FeFe] Group A3	Bifurcating	Labile	3	[FeFe]-centre, 3 x [4Fe4S] clusters, 1 x [2Fe2S] cluster	NADH dehydrogenase, thioredoxin	0.222789	0.00960211	0	0	0	0	0.479656	1.09572	0	0	0	0	0	0	1.04242	0	2.99768	0	0	0	0.908327	0.123841	0	0	0	1.61211	0.698849	0	0	0	0	0	0	0	0	0	0	0	0.430335	1.08653	0
WP_012065136.1	MEKVTLTIDNITVEVPKEYTILEAAKTVGVDIPTLCFLKDANEIGACRVCLVEIQGARALQASCVHPVAEGMVIKTNTKKLRDTRKSTVELILSNHNRECLTCFRNKSCELQSLAEELNISEIPFEGEKTVGTIDDKSTSIVRDSSKCILCGRCVNVCKNVQKTSILEFTNRGFETQISPAFNKSMNETPCIYCGQCIVSCPVAALREKEDIERVWDAIEDPEIHVVVQTAPAVRAALGEEFGLPIGSRVTGKMVASLKRLGFDQVFDTNFGADLTIMEEGHELLHRLQNNGKLPMITSCSPGWVRYCEFNYPEFIENLSTCKSPHQMLGAIIKSYYAEKQQIDPKKIFVVSIMPCTSKKSEAARPEMTVDGLRDVDAVLTTRELAKMIKQARIEFLKL…	[FeFe] Group A3	[FeFe] Group A3	Bifurcating	Labile	4	[FeFe]-centre, 3 x [4Fe4S] clusters, 1 x [2Fe2S] cluster	NADH dehydrogenase, thioredoxin, thioredoxin	0.534718	0.364324	0	0	0	1.37943	0	1.09572	0	1.83824	0	4.87794	0	0	0.521209	0	0	0.460833	0	0	0.908327	0.495365	1.432	0	0	1.07474	0	0	0	0	0	0	0.799931	0	0	0	0	0.774432	0.430335	0.543267	0.643165
WP_026651247.1	MSTRSVIPFGPQHPVLPEPIHLDLVMEDEKVVEAIPSIGFIHRGLEKLVDKKDFNEMVYVAERICGICSLGHGLGYSEALEHIMDIDVPARAKYLRTIWSELSRIHSHLLWLGLLADAFGFESLYMDCWRLREDALDMFEASTGGRVIFSVMKIGGVRRDVSNEMLKDFYQRILKMEEDLKAIAKPFLNDVAVQSRLRGVGVLTAEQADMLGCAGPFLRASGVNRDIRTTGYCAYGDVEFEPILSNDGDSYARTECRIKEIFQAFDIIRQCIDKMPAGDIDVPVKGMPNGEYMMRIEQPRGEALYYVKANGTKFIDRLRVRTPTFSNIPGLVETLKGCDLADVPILVLTIDPCISCTER	[NiFe] Group 4e	[NiFe] Group 4e	Evolving	Sensitive	6	[NiFe]-centre, 1 x [4Fe4S] clusters	NuoL, NuoH, NuoC, [FeS] protein	0.606916	0.485789	1.54457	2.325	1.41309	0.919623	0.479656	0	0.459702	0	0	0	0	0	0.521209	0	0	1.84333	1.51208	0	0	0.495365	0	0	0	1.07474	2.09655	0.924536	0.754635	0	0.171133	0.462051	2.39979	0	0	0.594992	0.433716	0	0.86067	1.08653	0
WP_010251151.1	MSKRTIIPFGPQHPVLPEPIHLDLVLEDEKVVEAIPSIGFVHRGLEKLVEKKDFIEYIYVAERICGICSFMHGMGYSQAIEQIMKIEVPERAVYLRTIWAEFSRLHSHMLWLGLLADAFGFENLFMHCWRVREKILDIIEETTGGRVIFGSCKVGGVRKDIDPVTLKRMSKFVVDLEKEIKEISSMFMNEYTVKHRLVGVGVLSKEDAHTLGAVGPMMRASGIAQDMRKLGYGAYSQLEFEPITRTNGDSYDRCAVRIDELFQSISLIRQAIDKIPDGPVDVKVTGNPDGEFFARLEQPRGEVIYYVKGNGTKFLDRVRVRTPTFANIPSLLKMLQGCDFADVPILILTIDPCISCTER	[NiFe] Group 4e	[NiFe] Group 4e	Evolving	Sensitive	6	[NiFe]-centre, 1 x [4Fe4S] clusters	NuoL, NuoH, NuoC, [FeS] protein	0.771685	0.626287	0	0	0	1.83925	2.39828	0	0.459702	0.919119	0	0	0	0	0	0	0	4.60833	0	0	5.44996	0	0	1.78261	0	0.537368	0	0.924536	3.77317	0	0.342266	0.462051	1.59986	0	2.11745	0.594992	0.433716	0	0	0.543267	0
WP_012635165.1	MGLVITSEAKCRDCYKCIRYCPVKAIGIKDGQAWVDEDRCILCGRCIEACPQNAKKTEQYLDKFKNYIASGNKVVVSLAPSYLASGYFSTPWKLVGALKELGVDVVEETAIGAEVIADEYRDLLNKKELIISSCCPTVVNLVEKYFPGLCDYLAPVISPMIAHGRLIKQEMGENCRVVFIGPCYAKKEEALTRGEGSIDAVLTFEEIFNYLDRLNQDIPPRNIFPDRTSNRARRFPLPGGALRTGGLNELNIKPDDIVSISGLEDCMETFRDIEKGLIKPRFIEAMACRGGCLGGPAMGEDAGILARKQRLYNNLNRGQQSCRGANNKGIIVSWSYTPREIDYKVPDEEEIKRILALTGKTSPEDETNCGGCGYPSCRDKAIAVYNGLANPEMCIPYMR…	[FeFe] Group C	[FeFe] Group C3	Sensory	Labile	2	[FeFe]-centre, 2 x [4Fe4S] clusters, PAS domain	Phosphatase	0.208914	0.0474467	0	0	0	0.919623	0	0	0	0	0	0	0	0	0	0	0	0	0	0	0	0.495365	0	0	0	0.537368	0	0	0	0	0	0.462051	0	0	0	0.594992	0.867433	0.774432	0	0	0
WP_013781004.1	MNMVNLTIDGRKVTVPENTSILDAAKKVGIDIPTLCYFPDQNIKGNCRVCVVEVEGSRTLAASCSTPVSEGMAVKTWSKNVMNARRTIVQLMLADHDEDCNNCIKNGVCELQSLAQRLNIQYNPFKNILELKPIDTSTPSLIRNPNKCVKCGRCVDMCQETQQVGILFDAYRGVDSEIVSGLGKYLSDAGCILCGQCSTACPVAAIYENDETDKVWQAIFDPSKRVIVQTAPAIRVSIAEEFDMPPGTVALGQLAAALRRLGFDDVFDTDFAADLTIMEEGHELLERLQHGGTLPMITSCSPGWINFIEQYYPDLLSHLSTCKSPQQMFGAVAKTYYAQKIGLKPEDIFVVSIMPCTAKKYESGRPEMSDSGVRDVDVALTTRELARMIRQAGIDFAAL…	[FeFe] Group A3	[FeFe] Group A3	Bifurcating	Labile	3	[FeFe]-centre, 3 x [4Fe4S] clusters, 1 x [2Fe2S] cluster	NADH dehydrogenase, thioredoxin	0.721059	0.717108	1.54457	2.325	2.82617	0.459812	0.479656	0	0.919403	0	0.684393	1.62598	0.686718	0	1.56363	0	0	0	0	0	0	0.99073	4.29601	1.78261	1.99381	1.61211	0	0.924536	0.377317	0	0.855666	0.462051	0	0	0	0	0	0.774432	0	2.71633	0
WP_006584326.1	MISLNIDGKYVKVPEGSTILDAAKQLGIDIPTLCHLKLDDAVGMVNKSASCRICVVEVKGRRNLAPACATPVVEGMEVRTNTIRVMNARKTVLELLLSDHPKECLTCAKSGNCELQELAERFCIREVRFQGEESTYKKDHSPALERDMDKCVMCRRCETMCNDVQTVGVLSGINRGFSSVVAPAFERPLVDTVCTFCGQCAAVCPTGALVERDYSWQVIEALADPDKVVVVQTAPAVRAALGEEFGLEPGTLVTGKMVAALRQMGFDYVFDTDFAADLTIMEEASEFLDRLNRFLAGDKDVRMPILTSCCPAWVKFFEHQFPELLDVPSSAKSPQQMFGAVAKNFFAKKLGIPREKLVVVSVMPCLAKKYEASRPEFSENGNPDVDISISTRELAHLIK…	[FeFe] Group A3	[FeFe] Group A3	Bifurcating	Labile	4	[FeFe]-centre, 3 x [4Fe4S] clusters, 1 x [2Fe2S] cluster	NADH dehydrogenase, thioredoxin, thioredoxin	0.395007	0.224126	0	0	0	0.919623	0.479656	3.28716	1.3791	0.919119	0	0	0	0	0	0	0	0.921666	1.51208	0	0.454164	0.371524	0	0	0	0	0	1.84907	0	1.97001	0	0.462051	1.59986	0.339987	0	0.594992	0.433716	1.54886	0	1.08653	0
WP_013484003.1	MEEYQEMSRRLQKATAEGRLQDEIDAIRASGSEKEKQQLDMLLHPENYPPVVRLEDCMCSTDHQAACEVSCLFEAIGRDRDGKLVITGDCVGCGQCVERCEQKALAGRKDLIPLLKLLRERSTPVYAMIAPAFSGQFTAEVTSGRLRTAFKRLGFYGMIEVALFADILTLKEALEFDQTIQSDEDFMLTSCCCPMWVALIKKGFSELIPHVPPSVSPMVACGRTIKKIHPEAKTVFIGPCIAKKAEARQPDVADAVDFVLTFDEVGQMFADAELDLPNLPEDMSDHSSTAGRIYARTGGVSQAVQATLDRLRPDHKIPLRAIQADGIVACKQLLADLKDGKIKANFMEGMGCKGGCVGGPKSLLPKEEATGHVNAYGEQAGYATPADNPYVLEILRRLG…	[FeFe] Group B	[FeFe] Group B	Evolving	Labile	1	[FeFe]-centre, 2 x [4Fe4S] clusters	None	0.329974	0.290986	0.514858	0.774999	0	0.459812	0	0	0	0.919119	0.684393	0	0	0	0	0.53818	0	1.3825	0	0	0	0.247683	0	0	1.74458	0	0	0	0.377317	0.492503	0.342266	0	0	0	0	0.594992	0	0	0	0.543267	0
WP_013979953.1	MVKLSIDGRETSASEGSTILDAAAGLGIKIPTLCALKDLNIIGSCRVCLVQVEGEEAPCAACSTPVREGMEVRTDTPQVAAMRRANVEALLDSHRSECTSCARVDTCALRKLAADFAVGESTCDMPAKGAWNEDFPLIRDSSKCIKCMRCVAFCEKVQHCAVWEPSGSGTGASVAVKDGLDISEAGCALCGQCITHCPTGALTARSDIDKVLDALLDPEVMTVVQVAPAVRAAWGEGVKLSREQATPGRMASALRALGFDRVFDTDFAADLTIMEEGSEFLEFVKSDKPRPMFTSCCPGWVRFAKLHHPEIVPQLSSAKSPHQMMGALVKNTLREAAEAGGKKRIFCVSVMPCVAKKYECDVPELSTEGGRDVDAVLTVREFDRMLRMFSVDCAALEET…	[FeFe] Group A2	[FeFe] Group A2	Evolving	Labile	2	[FeFe]-centre, 3 x [4Fe4S] clusters, 1 x [2Fe2S] cluster	NADH-dependent glutamate synthase	1.05742	1.09329	0	0	1.41309	0.919623	0.959312	0	0.459702	0.919119	0.684393	0	2.74687	0	0.521209	0	2.99768	0.460833	0	0	0.908327	1.11457	7.16001	0	4.23684	1.61211	0	0.924536	0.754635	0.985006	0	4.15846	0	0.679975	1.05872	0	0	1.54886	3.01234	0.543267	1.92949
WP_005038259.1	MTAEKTLTIDGLPVAIQDEKNILEMIRRAHIELPTFCYHSELSVYGACRLCMVEVEGRGLVAACSTAPEPGMKLRTQTPQVRELRKMNIELLLASGNHDCPTCSKSGSCKLQSLAERLGVTKVRFHAPVPERPLDTSSPSILRDPSKCILCGDCVRFCDEIQGIGAIGFTHRGSQSMVAPAFNKGIAEVDCVNCGQCAAICPVGAITVKSDIEKVFDVLGDPSKTVIVQVAPAVRSAMAEAFGLPNDTFTTMGRIVTALRRLGFKKVYDTSFTADLTIWEEATEFINRKQKGGKLPLFTSCCPAWVKLAEHDLPEILDNISSCRSPQAMFGSLAKEILPGELGIQREDLVVVSVMPCTAKKFEATRPEFAVDGNPDTDLVITTQELARMIQDAGLLFGE…	[FeFe] Group A3	[FeFe] Group A3	Bifurcating	Labile	3	[FeFe]-centre, 3 x [4Fe4S] clusters, 2 x [2Fe2S] cluster	NADH dehydrogenase, thioredoxin	0.586028	0.418086	0.514858	0	1.41309	0	0.479656	1.09572	0	0.919119	0.684393	0	0	0	1.04242	0	0	0.921666	0	0	0.908327	1.23841	2.864	1.78261	0.996904	0	1.3977	0.924536	0	0.492503	0.684533	0.462051	0	0.339987	0	1.18998	0.433716	2.3233	0	2.71633	0
WP_011640436.1	MVNLTIDGIKVSVPEGSTILQAASEVGIKIPTLCFHPDQSIKANCRVCVCEVEGNRLLQAACAMPVFEGMVVKTRTPKVLDARKTILELILSNHPQDCLNCIRNGNCELQDLAQEYCIRENPFEYKVRGFAKDFSTPSLFRDQDKCILCRRCIEACSVIQSVNALGMEGRGYNSMVVPTLGKALIDSPCVMCGQCIHACPVGAIGEREQIDEFLAAVANPDKVVITQIAPAVRVAIAEEIGMMTGELPMGTFVQGLRQIGFDHVLHTNFTADLTILEEGNELLKRLKEGGTLPMFTSCSPGWINFCETFYPDLLDNLSTCKSPQQMFGALAKTYWAEKMGIDPSKIYSVSIMPCVAKKFEAARPEMNDSGYQDVDLVLTTREIGRLFRMSGLDFSKLPA…	[FeFe] Group A3	[FeFe] Group A3	Bifurcating	Labile	3	[FeFe]-centre, 3 x [4Fe4S] clusters, 1 x [2Fe2S] cluster	NADH dehydrogenase, thioredoxin	0.414188	0.704848	0.514858	0	0	0.919623	0	0	0	1.83824	2.05318	0	0	0	0	0	0	0	0	0	0.908327	0.371524	1.432	0	0	1.07474	0	0	0	0	0.684533	0	0	0	0	0.594992	0	1.54886	0	1.6298	0
WP_017890116.1	MSVISTIRTSCRDCYKCIRHCPVKAIRISLGHAEVVDERCIKDGRCVLVCPQGAKKVRSDLEEAKKLIASGGTVIASVAPSFVAAFPEATPGQVIRGLRMLGFSEVRETAEGAEWVAREHALLLQEGRENLITSSCPAVNFLITRYFPEHIEYLAPVVSPMVAHGRLLKREFPGASIVFIGPCIAKKAEAEEEEVRGDVDVVLTFSELREWFKEAHLELTALPEDRFSPGKVRFARAFPVEGGLIKSAALQGELLCRDILTITGVDRCKEFLKSFSPERSRFRIIEMMSCEGGCIDGPVLSSPLSPYERRERVLEYTEKFLKECEEPIVCLDPPSFRRTFSPSPVPRPEVPEEEIRRILALTGKFTPQDELNCGACGYNTCREKAEAVYQGMAEAEMCI…	[FeFe] Group C	[FeFe] Group C3	Sensory	Labile	2	[FeFe]-centre, 2 x [4Fe4S] clusters, PAS domain	Phosphatase	0.253061	0.166941	0	0	0	0	0	0	0	0.919119	2.73757	0	0	0	0.521209	0	0	0	0	0	0	0.123841	0	0	0.996904	0	0	0	0.377317	2.95502	0	0.462051	0	0	0	0.594992	0	0	0	0	0
WP_011940950.1	MEPIITLTEKCRKCYSCVRSCPVKAIKVEKNYSEIIFERCIGCGNCLSNCPQHAKVVTDKVGVTEKLLASDQTVIAVLGCSFPAFFHSVSSGQLVAGLKKLGFAEVHEGAAGVELIAGGYAEAIEKSAGSLISSHCPAIVDLIERHYPSLIKNLVGVISPMVAMGRFLKNVLGPDVKVVYLSSCIAAKFEIQAEETTGAIDTVLTYRELEEIFKNRAINPASLKEEPFDGLQPHLGRLFPISEGTFKAFSIATDPLDTEIVTAAGEVNVMGIIRDLASGRINPRIVDVRFCYEGCIGGPGKNSELTEFYKRNLIISHFKNEAPYRTAPHYLEQREPLPLTRSFANKYAKFKVPKGSDVKKVLHATNKFTQKDELNCRACGYRTCREYAVAVFQGLADLE…	[FeFe] Group C	[FeFe] Group C3	Sensory	Labile	1	[FeFe]-centre, 2 x [4Fe4S] clusters, PAS domain	Fusion with transcriptional activator	1.86578	2.43037	0.514858	6.97499	4.23926	0	0	5.4786	1.83881	3.67647	0.684393	1.62598	0.686718	4.6587	2.08484	0	0	1.3825	0	0	0	2.72451	2.864	1.78261	2.49226	0.537368	0	0	1.88659	0	3.25153	0	0	0	0	2.37997	0	0.774432	0	1.6298	0
WP_022000256.1	MTEQKKTLFIDGKEVEIENERNILELCRKVGIDIPTFCYQPELSIYGACRMCLVDIEGRGILSSCSTPPEPGMKILTNTSEIRKLRRTTMELLLASHPQDCLKCGKSTVCKLQEIARKVGVKNIRYKHLPKKIKVDNSSYSLIRDPAKCILCGNCVRMCAEVQGIGAINFINRGSNSVVTTAFGKDMSKTECVNCGQCAAVCPTGALQIRSEVEEVMDAINDPDKVVVIQIAPAVHVAIGELFGMQPGELCTKKIVSALKALGVDYVYDTCFTADMTIVEEATEFVERKKNGGVFPMFTSCCPAWIKFAETYYPSLLSNISSCRSPQQMFGSVVREAMPSVSGKPNKDIVSVSIMPCTAKKFEARRPEFEHDGQRDVDYVLTTQELGELLSSSGIDLAH…	[FeFe] Group A3	[FeFe] Group A3	Bifurcating	Labile	3	[FeFe]-centre, 3 x [4Fe4S] clusters, 1 x [2Fe2S] cluster	NADH dehydrogenase, thioredoxin	0.263872	0.052663	0	0	0	0	0.479656	0	0.459702	0	0	1.62598	0.686718	2.32935	1.04242	0	0	0	0	0	0	0.247683	1.432	0	0.747678	0.537368	0	0	0	0	0	0	0	0	0	0.594992	0	0.774432	0	1.08653	0
WP_014254572.1	MKGYFHSVTLDEEKCKGCTNCIKRCPTEAIRVRKGKARIIAERCIDCGECIRVCPYRAKKAITDPFENIYNFKFKVAIPAPTLYGQFKYMKSINHLLNAFKLIGFDHVYEVARAAEIISSATKELMKKNDLPKPLISSACPAVVRLIQVRFPNLIDNILKLESPMELAAKIVKDEIEKNKNIPREDIGVFFITPCAAKVTSIKAPYESEKSCVDGAISIKDIYLKLFNGLGEVKQEENLVMAGFTGIRWANSGGESLALGTENFLAVDGIHNVISILEELENDKLEDVDFIETLACQGGCLGGPLTVENLYVAKTRIKKFIDMAKKNVVQENPDNIYDYDLLWKRNVEYKPILKLDEDFEIAMKKLEALQSISEELPGLDCGACGAPNCRALAEDIVRG…	[FeFe] Group C	[FeFe] Group C1	Sensory	Labile	2	[FeFe]-centre, 2 x [4Fe4S] clusters, PAS domain	Histidine kinase	0.191778	0.0525245	0.514858	0	0	0.459812	0.479656	0	0.459702	0.919119	0	0	0	0	1.56363	0	0	0	0	0	0	0	0	0	0.498452	0	0.698849	0	0	0	0	0.462051	0	0	0	0	0	0	0	1.08653	0
WP_009132353.1	MAFTNNIMIVRHRLLTELVKLWRDNELVEKIDRLPIELSPRRSKHAGRCCVHKERAVWKYKSLPLLGLDMEDEQDELTPLSEYAARALDRAENGKPKDNIMCVIDEACSACVQINYEITNLCRGCTARSCQTNCPKKAVHVKESGQAWIDHDECISCGICHKNCPYHAIVYIPVPCEEACPVKAISKDKKGIEHIDESKCIYCGKCLNACPFGAIFEVSQVFDVLHKIRKGEKVVAIVAPSILGQFKTTIEQVYGALKAVGFADVIEVAQGAMDTVSNEAHELIEKLEEGQKFMTTSCCPSYIELVNKHVPGMKPYVSSTGSPMYYSARIAKEKHPDAKVVFIGPCVAKRKEAQWDDAVDFVMTFEEVASVLDGLDIQLEQTHPYSMSFASVREAHGFA…	[FeFe] Group B	[FeFe] Group B	Evolving	Labile	1	[FeFe]-centre, 3 x [4Fe4S] clusters, 1 x [2Fe2S] cluster	None	0.607414	0.447894	0	0	0	2.29906	0	0	1.83881	11.9485	0.684393	1.62598	0	0	0	0	0	1.3825	0	0	0.908327	0.495365	0	0	0	0.537368	0	0.924536	0.754635	0	0.342266	0	0	0	0	0	0	0.774432	0	0	0.643165
WP_013175699.1	MAKNGEHREEVKTLSLTAADTGIIKVTSDCHGCDHCTSVCPSHAIKGRIGEQHHIDTRKCLNCGQCLISCPFGAIEDASMVSQVKKALTDPDIFVVVQEAPSVRVALGEEFGMAPGTNVKGKMYAALRKLGFDRVYDTEFAADLTIMEEGTELIHRIFKHLGIPGYEHVGPLPQFTSCCPAWVKYAEDNYPEVLPHISSAKSPQQMFGAVAKTYAAQKLNVDPANMFVVSVMPCTAKKYECNRPEMIASGYKDVDAVITTRELAQMIKEAGIDFASLPDEKADKFVGLSTGAATIFGATGGVMEAALRTAYEVLSGQSLEQIDFKNVRGLRPIREASVEIPIKDLGKTLPVKVCVVSGTKHVDGVIKDVLKGRSPYHFIEVMNCPGGCVNGGGQPIRRD…	[FeFe] Group A1	[FeFe] Group A1	Evolving	Labile	3	[FeFe]-centre, 2 x [4Fe4S] clusters	Small subunit, cytochrome b	0.176886	0.0247158	0	0.774999	0	0	0	0	0	0	0	0	0.686718	0	0	0	0	0.460833	0	0	0.454164	0.247683	0	0	0	0	0	0	0	0.492503	0.342266	0	0	0	0	0	0	0.774432	0	0.543267	0
WP_013387868.1	MRNFVFNKAMELRRDTLKTIVSLYEKDQLREKFPKIVREILPGDNPVYRNNIYREREILKQRIKIYLDFDYEKTRDLELFELVNHLDSKFFYKKDELRGKHKYVRVIKEACDVCPSGKYYATDLCRNCIAHNCTNVCPRDAIVFDDGRAKIIPEKCIGCGLCAKSCDYYAIVKLERPCERACTLNAITKDENGAADINKDKCVACGACHVACPFGAIESPTQILDVVHTIKNQDEVIAIYAPAIVSQFGHTVSPGKIKSLFKKLGFSDAMEVAVGADMVAEEEVEILRENPGKMTTSCCPSFYSYIKKHQPEMEKYISHAPSPMAKLAEHLKEKYPNKKIAFIGPCIAKKMEADKYNVLKEKKVVDYVLTFTDVAAWIEARELDVATLPEDDILGTSFG…	[FeFe] Group B	[FeFe] Group B	Evolving	Labile	1	[FeFe]-centre, 2 x [4Fe4S] clusters	None	0.217019	0.0624903	0.514858	0	0	0.919623	0	0	0	0	0	1.62598	0	0	0	0	0	0	0	0	1.36249	0.123841	0	0	0	0	1.3977	0	0	0	0	0.462051	0	0	0	0	0.433716	0	0	0	0.643165
WP_005028008.1	MSQTSSFSLPIGPVHVALEEPVYFHLDVDGETVRKVEITSGHVHRGMEGMATQRNFFKNTTLTERVCSLCSNSHSLTYCMAVENVLGMTPPPRAQYLRVLAEETKRVASHLFNIAIFAHNVGFKSLFLHIMEVRENMQDVKETIYGNRMNLSANCIGGVKFDMDDSLTMYMLERLDTVEEAVKRVEKVFRTDPLIAKRSRGVGVLSREDAWALGVVGPVARGSGLDIDVRKNTPYLVYPDLYFDIVKEQDGDVWSRAMVRVREVFESIRLLRQCLDKLPDGPLAVHMERIPESESVARSEAPRGELIYYLQTNGTDTPARLKWRVPSYMNWEALTVMMKDCQLADIPVIVNSIDPCVSCTER	[NiFe] Group 4c	[NiFe] Group 4c	Evolving	Sensitive	7	[NiFe]-centre, 1 x [4Fe4S] clusters	NuoL, NuoH, NuoC, [FeS] protein, polyferredoxin	0.409015	8.47909	0	0	0	0	0	0	1.83881	0	0	0	2.74687	0	0	0	0	0	6.04833	0	0	0.123841	0	1.78261	0	0.537368	0	0	0	0	0.342266	0	0	0	0	0	0	0.774432	0	0.543267	0
WP_021169841.1	MMGHHASDPNKIVNVTIDGIPVSCPETTLILDAAKMAGVKIPVLCYHPDLKVRATCRICVVEVKGQRKLKTACSNEVWDGAEFITNNPAVRQARKDVLELILAEHPQDCLKCVRNTSCELQQLARDFGISKPLFKNEPKQLPIEDSNGVIVRDMAKCVKCGRCVEMCQEVQTVGAINTAHRSVEYEITTAFDRPLQDSTCVYCGQCISVCPVGALYEKDETEKVWQAIDDKEKHVVVQVAPAVRVALGEEFGLEPGSITTGKMVAALRRLGFDKVFDTDFAADVTIMEEGSELLERMTNGGTLPLITSCSPGWINFVETFYPDLLPHVSTCKSPQQMFGALAKSYYPEKAGIDAAKIVSVSIMPCTAKKYESARPEMNGSGYRDVDVALTTRELARMIK…	[FeFe] Group A3	[FeFe] Group A3	Bifurcating	Labile	3	[FeFe]-centre, 3 x [4Fe4S] clusters, 1 x [2Fe2S] cluster	NADH dehydrogenase, thioredoxin	0.507398	0.384532	0	0	1.41309	0.459812	0.959312	0	0.459702	0	0	0	0.686718	0	0	0	0	0.921666	1.51208	0	0.454164	0.619207	0	0	0	0.537368	0.698849	0	0	0	0.171133	0	0	0	0	0	0.433716	2.3233	0	1.6298	0
WP_005364906.1	MKENYTPLIQLRRMVFVEVARMGYDDNEKLAHNIEEAVYTILPGEVAQYRDSIYKERAIVGERLRMALGMKMRAQDEYSRLSDGCEKIIKSERIVQDELVQVMPFACEACPTKTYRVTNNCRKCLAHPCIQVCPVNAISMGQYSTIIDEEKCIRCGRCKDNCPYNAIVFFDRPCAAACGVNAIESDYLGRAIINQDKCVTCGMCLVHCPFGAIADKTEIFQLIQAIKNGEEVHAILAPAFVGQFGPLVKPDMIKEGIRRLGFKSVVEVALGADIESIHEAEEFLTEVPETLKFLGTSCCPSWYLAATKNFPEFKQNISSSATPMVATAKHIKEDHKNAKIAFIGPCVAKKTEASQPHLKHLINFVITFEELMGMLVARNIDFMSLKDAPPARDDASTSG…	[FeFe] Group B	[FeFe] Group B	Evolving	Labile	1	[FeFe]-centre, 2 x [4Fe4S] clusters	None	0.421059	0.483301	0	0	1.41309	0	0.479656	1.09572	1.3791	0	0.684393	0	5.49374	0	1.04242	0	0	0.460833	0	0	0	0.247683	0	0	0.249226	0	0.698849	0	0	0.492503	0.171133	0	0	1.01996	0	0	0.433716	0	0	0	0
WP_027629995.1	MQTFKDLYNRLVKAAVQNRVEEEVEEIRKQDFDPHQLDCLLHPKDYGPVWRLGDCDCCDDDGKNCPTKCLFDALEKDEKGNVSINVEKCVGCSGCVDRCKAEKLVGSRDILPTLDAVNNAQGPVYAMIAPAFTSQFSEEVTPGKLRSAFKRLGFAGMLEVALFADILTLKEALEFDRNILDEKDFLLTSCCCPMWIAMIRRVYSQYVPHVPGSVSPMIACGRSIKLLEPNAVTVFIGPCIAKKAEAREKDIADAVDFVLTFQEVRDIFEAAGIDPARLKEDSRDHSSKAGRIYARTGGVSEAVQTTVERLNPHRKISVKARQADGMPACKELLGALKEGRITENFLEGMGCVGGCVGGPKAILNREDGRKNVMAYGSQALYSTPIDNPYVIDLLHRLGF…	[FeFe] Group B	[FeFe] Group B	Evolving	Labile	1	[FeFe]-centre, 2 x [4Fe4S] clusters	None	0.24737	0.102641	0	0	0	3.21868	0	0	0	0	0	0	0	0	0	0	0	0	0	0	0	0	0	0	0.498452	0	0.698849	1.84907	0	0	0.171133	0	0	0	0	0.594992	0	0	0	0.543267	0
WP_007861015.1	MRGVETRIQEIRHRIFTEVARMAYHTEWPVDKRIEELPYKIIPGEVGKFRNDVFLERAIVGERLRLAMGLPYRSAAESAPISDNIGAADQSETYYTPPLINVIKFACNACHEKRVVVTDGCQGCLAHPCVEVCPKDAVSIDRSNGRSHIDQDKCIRCGRCAEVCSYHAVIVQERPCAAACGMDCIHSDENGKADIDYDKCVSCGMCLVNCPFGAIADKSQIFQVIRAIQSGERVYAAVAPAFVGQFGPKVTPGKLRAAMKALGFADVFEVAVGADLCATQEAIDFMQEVPEKLPFMATSCCPAWSMMAKKLFPEQADCISMALTPMTLTARLIKRHHKNAKVVFIGPCAAKKLEAMRTDIRSDVDFVLTFEEMTGIFDAKHLEVEKMEEDPDGVNDASM…	[FeFe] Group B	[FeFe] Group B	Evolving	Labile	1	[FeFe]-centre, 2 x [4Fe4S] clusters	None	38.0084	51.8183	21.1092	31.7749	24.0225	45.5213	43.6487	40.5417	35.397	29.4118	34.904	19.5118	62.4913	37.2696	18.7635	15.6072	29.9768	55.7608	60.4833	31.4915	50.8663	22.5391	18.616	37.4349	24.9226	25.7937	44.7263	48.0759	36.9771	55.1603	26.5256	41.1225	29.5974	56.4379	46.5839	30.9396	65.4912	23.233	47.7672	14.1249	40.5194
WP_002599108.1	MKKLFINDREIQVEEGTTILDAARQNGIDDIATLCYLKDCSNIGKCGVCAVEVEGKPNLALACLTKVEDGMVVKTNTEKVQERVKMRISTILNKHEFKCGPCPRRENCELLKLVIKTKGRAAAPFLPEDREANVDRRSKSIIIDRNKCVLCGRCQAACKQKAGTEIIQIRNVDGVRMVCPPDNKSFDEAKCLLCGQCVAACPVGALQEQSHLDRVKNALADEDKHVIVAIAPAIRTAMGELFKMGYGQDVTGKLYAALRRLGFNKIFDINFGADMTIMEEGTELLERIKNNGPFPMFTSCCPGWIREVENYFPEFLDNLSSAKSPQQEFGAASKSYYPLTEGIDPKSVFTVTIMPCTAKKFEADREEMQNDDLRNIDAVLTTRELAKLIKDAKIDFANL…	[FeFe] Group A1	[FeFe] Group A1	Evolving	Labile	1	[FeFe]-centre, 3 x [4Fe4S] clusters, 1 x [2Fe2S] cluster	None	0.199509	0.036622	0.514858	0	0	0.459812	0	0	0	0	0	0	0	0	0	2.6909	0	0	0	0	0	0.247683	0	0	0	0	0	0	0	0	0	0	6.39944	0	0	0	0	0	0	0	0
WP_009203940.1	MVNITIDNHTIAVPSGTTIMEAAASIHIPIPKLCYLKDINEIGACRVCVVEIEGQDHLVTSCNNVVEEGMTIYTNSPKVRRNRKHTVEMILSQHDAQCATCVRSGNCTLQTVANDLNIVDSPYKKEICIEEWDTRYPLVRDASKCVKCMRCIQVCDKIQGMHIWDVSGTGARTTIGVSENRDIKTADCALCGQCITHCPTGALRERDDTDKLYRALEDKDTIVVAQIAPAVRAAWGESLGLSREEATVEKIVDALRRIGVDYVFDTTFSADLTIMEEGTEFVERFTNGDLDMYPMFTSCCPGWVRFIKSQYPQMVNRLSSAKSPQEMFGAVMKTAFAKKMNIDPDRIFALSIMPCVAKKDEREKPLFHGEFAGHGVDCVLTTRELDRLIRADHIDPKTL…	[FeFe] Group A2	[FeFe] Group A2	Evolving	Labile	2	[FeFe]-centre, 3 x [4Fe4S] clusters, 1 x [2Fe2S] cluster	NADH-dependent glutamate synthase	92.0446	112.08	109.665	41.8499	24.0225	50.5793	86.8177	51.4989	59.7612	69.853	82.8115	182.11	3.43359	60.563	48.9936	13.4545	176.863	52.0741	166.329	157.458	162.136	58.5769	34.3681	62.3915	72.2756	86.5163	40.5332	119.265	149.418	157.601	45.6926	197.296	15.1987	349.507	142.928	114.834	150.066	83.6387	82.6243	134.187	95.8315
WP_027626440.1	MEEKALIITDEKTCVGCNQCIRYCPIFDANTAYIKDGENKVKINPDKCIHCGKCIEVCEHNCRDYIDDTEKFFNDLKNGKKISVLAAPAIRVNSANYKKLFGYLKSLGVKFFYDVSFGADITVWAYLKYIKENNINSIIAQPCPAIVNYIEKNNLDLLNSLCKVQSPLLCSAIYIKKYLKEDSSLAFLSPCIAKKDEIMNETSHGFVNYNVTFKKLLAYIINNNIDLSKYEEVNFNSDNGLGFLFSRPGGLKENIQAYDENLWVRQIEGQEVVYDYLDEYGERVKKNLQVPNVIDALNCEFGCNIGTGSIKERVFIDDIDVKFNNIKKEKNKKEISKIHKKFDKELNLKDFLRDYKVKSKEKVKEPSNAKYEEIFKDMLKYTQNSRSIDCAACGYVNCN…	[FeFe] Group C	[FeFe] Group C2	Sensory	Labile	1	[FeFe]-centre, 2 x [4Fe4S] clusters, PAS domain	Fusion with methyl-accepting chemotaxis protein	105.347	142.022	72.595	53.4749	74.8935	22.5308	50.8435	35.0631	79.9881	20.2206	79.3896	138.208	19.9148	51.2457	107.89	307.301	89.9305	95.3924	214.716	233.037	232.532	119.755	58.7121	208.566	44.113	49.4379	123.696	30.5097	20.7525	146.766	108.841	49.4394	34.397	116.616	214.921	148.748	46.8414	28.654	23.2381	22.8172	79.7524
WP_022746500.1	MVNKNTSFIQSSLGSVFSTFSEEELKQITNNQKRSIAICGKINKPGIIDVPEGATLKQIIDICGGLINNSGFKAAQVGIPFGGFLTEESLNKELDFELFDKNVSRNIIILSQEDCIIQYEKFYIEYLLGKIKDGSYKKYIIVEEELVEMLKILDRISKGVSNMREIYSLRNLTQTKKLKLKQSHNIMEEIIEKFYDEIKEHIEEKKCYTSQCNHLIKLTITKKCIGCSNCKRACPVDCINGEVKKRHNINYKRCTHCGACISACPVDAITAGDNTLLFLRDLATPNKIVITQMAPAIRVAIGEAFGFDPGDNVEKKLAAGLRKLGVDYVFDTTWGADLTIMEEAAEFQERLEKYLKGDKNVRLPILTSCCPSWIKFIEQNYPDMLDVPSSAKSPMQMLA…	[FeFe] Group A1	[FeFe] Group A1	Evolving	Labile	1	[FeFe]-centre, 2 x [4Fe4S] clusters	None	0.377661	0.25377	0.514858	0	0	0.459812	0	3.28716	0	0.919119	0	0	0	2.32935	0	0	0	0	1.51208	0	0.454164	0.247683	0	0	0	0	0.698849	0	0.377317	0	0	0	1.59986	0.339987	0	1.18998	1.73487	2.3233	0	0	0
WP_012158789.1	MVKLTIDGIQVEVPKGTTILEAARTLDIHIPTLCHLKGVNNSGSCRVCVVESGPRLVASCSIMAEDGMDIKTNTAKVRESRKTVVKLILSDHKRECTTCIRSENCELQSLSSELNIRDIEYDGERLQLGTDSLSPSVSRDPEKCILCGRCISTCSKVQEVHAIGFIERGFDTTVAPAYAKSLDDVFCTNCGQCITACPVGALYEKENIKDVWKAIYDKEKYVVVQTAPAIRAALGEEFGIPVGTSVTGKMVAALRRLGFDKVFDTDFTADLTIMEEGTELISRLTSGENLPLMTSCCPGWIKFAEHFYPDMLDNLSTCKSPHEMEGALIKSYFAEKMAMDPKKIVTVSIMPCTAKKFESARGELSNDGLQDVDLVLTTRELARMIKEAGIDFENLPVEE…	[FeFe] Group A3	[FeFe] Group A3	Bifurcating	Labile	4	[FeFe]-centre, 3 x [4Fe4S] clusters, 1 x [2Fe2S] cluster	NADH dehydrogenase, thioredoxin, thioredoxin	0.564302	0.474753	0.514858	0	1.41309	1.83925	0.959312	1.09572	1.3791	2.75736	0.684393	0	2.06015	0	0.521209	0	0	0.460833	0	0	0	0.371524	2.864	0	1.99381	0	0	0	0	0.492503	0	0	0	0	0	0	0.433716	1.54886	0.86067	3.2596	0.643165
WP_028828747.1	MKGDSMSYINLNPGSCQACYRCIRECPVKSIQFKDDNATIIENECILCGKCIEVCPHQAKFIQSELYNVQALIASGKKVIASVAPSYKAWSETSFEHLREQLLDLGFADAQETVIGASMVNHDYIRLMKEGSMPVIITSACPSVVMLIERHYPSLIGLIAPTLSPMMAHAKLIRRTQEDPHVVFIGPCISKKYEPSDILLSGYIDNVLTFDEIDSWLGAETASEPGKMKSQSDNKDSGSPLVNGLMDTSVRLYPRSRGVIDSLEAIEPFDGYLSIAIDGARDCIDMFSYLDECIRSGNMAEDKLFIEANICKGACMNGPIFKIAKKRTVFASSRLSKKAEPHDMLARDMLARDIDDIYDISLERQYLNRKPAVKEPTTDEITAILAQMGKHRPEDELNC…	[FeFe] Group C	[FeFe] Group C3	Sensory	Labile	2	[FeFe]-centre, 2 x [4Fe4S] clusters, PAS domain	Fusion with transcriptional activator	0.217081	0.0621347	0	0	0	0	0	0	0.459702	0	0	0	0	0	1.04242	0	0	0.460833	0	0	0	1.73378	0	0	0.249226	0.537368	0	1.84907	0	0	0	0.462051	0	0	0	0	0	0	0.430335	0	0.643165
WP_007050317.1	MVNLKINNVDVSVEEKTTILEAARQIGINIPTLCFLEHNKIGACRMCVVEIKGSDVLRSACNFPVKEGMEVFTNSPKVRESRKNTLELTLSDHNRDCTTCIRSGNCELQTLANDLGVNTVPFKGDFSSDTYDDKSLSVVRDESKCIFCKRCINTCAKIQGIGALIGKDNGFDSKSRPVKGDVLADTNCINCGQCIINCPVGALTEKVNVDEVWEALSDENKHVVVQPAPAVRAALGEEFGYEIGTDVTGKMVASMRRLGFDKVFDTDFGADMTIMEEAYELVDRVTNGGTLPMVTSCCPAWVKMCEQEYPELLDNLSSCKSPQAMTGALIKTHYAEVNNIDPKDIYVVSVMPCVAKKFEVAREQLKEDDLFDSDVCITTRELARMIKEAGIDFKNLDDE…	[FeFe] Group A3	[FeFe] Group A3	Bifurcating	Labile	4	[FeFe]-centre, 3 x [4Fe4S] clusters, 1 x [2Fe2S] cluster	NADH dehydrogenase, thioredoxin, thioredoxin	1.03429	1.09472	0	0	0	0.919623	0	0	0	0	1.36879	0	0	0	1.56363	0	0	0.921666	1.51208	1.57458	0.908327	0.99073	1.432	0	2.99071	0	0	3.69814	0.377317	0.985006	0.171133	0.924102	2.39979	2.03992	0	0	2.16858	2.3233	0	3.2596	0.643165
WP_014904712.1	MTTYDEIFKRLVKASYNDKLEQEIREIEASGNEATKKYVYYALGNGEQNKVVFQINDCKGECTSEKHNCETSCIFNAIVRDMEGKVVIQDRSCIHCGHCIDTCSLNNLIDKKEFIPLIDLLRKKEVAVYAIVAPAIIGQFGDRVTMGQLRAAFKQLGFYGMVEVALFADILSLKEALEFDRAVNSEEDFVLTSCCCPIWVGMVKRVYNQLIPHIQPSVSPMVACGRGIKRLHPEAKVVFIGPCIAKKAEAKEADIQDAIDAVLTFEEVKQIFEATGVNPEDMEDITSGHSSSAGRIYARTGGVSKAISDTLDQLRPDKLIRIKAVQAEGIQECKEILRSINQGDIKANFYEGMGCVGGCVGGPKALLKSELGTLHVNTYGLLADARTPLHNPYIRELLD…	[FeFe] Group B	[FeFe] Group B	Evolving	Labile	1	[FeFe]-centre, 2 x [4Fe4S] clusters	None	0.465027	0.363271	0	2.325	0	3.67849	0	0	0.459702	0	0	0	0	0	0.521209	0	0	0	0	0	0	0.123841	0	0	0	0	1.3977	4.62268	1.50927	0	0	0	0	0	1.05872	0.594992	0	0	0.430335	0	0
WP_013657394.1	MSEMKITIDDTQVMVSPGTTILEAAKKIGVQIPTLCHLDLHDTKMVNQAASCRICVVEVEGRRNLAPACATPVTDGMVVNTRSIKVLNARRMVLELLLSDHPKDCLICEKSGNCELQDLAITFGIRELTVGKDGAQSTYRKDVSEAIVRDMDKCIMCRRCETMCNKVQSVGALSGINRGFDAVVATAFEVDLADSVCTHCGQCVAVCPTGALSEKEHIWNVVRQLADPGKVVVVQTAPAVRAALGEEFGMAPGTLVTGKMVAALRKLGFNYVFDTDFAADATIMEEGAELVDRLTRFQNGDPTVKLPILTSCCPAWVNFFESQFPDLLDIPSSAKSPQQMFGAIAKSYFAQKMNIDPKNMVVVSVMPCLAKKYEASRPEFNREVDISISTRELAHLIKK…	[FeFe] Group A3	[FeFe] Group A3	Bifurcating	Labile	4	[FeFe]-centre, 3 x [4Fe4S] clusters, 1 x [2Fe2S] cluster	NADH dehydrogenase, thioredoxin, thioredoxin	0.200128	0.0378143	0	0	1.41309	0	0.479656	0	0	0	0	0	0.686718	0	0	0	0	0	0	0	0.454164	0.123841	0	0	0	0	0	0	0.377317	0	0	1.38615	0	0	0	0	0	1.54886	0	0	0
WP_015424900.1	MAKTVNVFIDGHHLEVPETMTIIEAADKIGIYIPRLCYHPDLPPTGNCGVCVVEIAGNPTPKRACCTPVAEGMKIVTNSKKLRSYRKTVVEMILSNHDVTCPTCPANNKCELQSLANNLGVDSEALPNILVKTPADESSLSIIRDTNKCIGCGRCITVCNEVQTVYALTFAERGIDTHIDTAFSQGMANSPCVNCGQCTVYCPTGALHERSELDAVWEAILDPEKHVIVQEAPSIRVSLGEEFGMPLGSVTPKKMYAALRKIGFDSVMDTNFTADLTIMEEGTECVTKLKAGEKRPLITSCSPGWIKFMETYYPDLADCVSTAKSPMSMFGVLSKTYYAQEKGIDPAKIVSVAIMPCTAKKFEARRPELSDSGFQDTDYVLTTREFIRMIKEAGIDFAN…	[FeFe] Group A3	[FeFe] Group A3	Bifurcating	Labile	1	[FeFe]-centre, 3 x [4Fe4S] clusters, 1 x [2Fe2S] cluster	NADH dehydrogenase, thioredoxin	0.23453	0.210639	0	0.774999	0	0.459812	1.43897	0	0	1.83824	0	0	0	0	0	0	0	0.460833	0	0	0	0.247683	0	0	0.249226	0	0.698849	0	0	0.492503	0	0	0	0	1.05872	0.594992	0	0	0	0.543267	0
WP_012635141.1	MSDTLVINGKTVAINGEKNLLELIRKQGIELPTFCYHSELSVYGACRMCLVEEENMGIIATCSTAPQPGMNIKTHSPRVQRIRKMALELLLANHDRDCTTCSRNGNCKLQDLAQRFGIDEVRFGTREEVLPVDNSSPSIVRNPNKCILCGDCVRTCQEIQGIGVLDFANRGSKSIVAPAFNKDLIEVDCVACGQCVAVCPTGALTIKSDISRVWEAINDPAKTVVVQIAPAVRVAIGEEFGMEPGEIQMGQLVAALKRLGFDKVFDTSFAADLTVMEETAEFIERFKEGKKLPQFTSCCPAWVKYAEEYAQDFLDNLSSCKSPQQMFGSVAKRFYSQDLGIDPEDMVVVSIMPCTAKKFEAQRPEFITDGVPDVDVVITTQEVASMIKKSGLVFSELGI…	[FeFe] Group A3	[FeFe] Group A3	Bifurcating	Labile	3	[FeFe]-centre, 3 x [4Fe4S] clusters, 2 x [2Fe2S] cluster	NADH dehydrogenase, thioredoxin	0.618108	0.52711	0	0.774999	0	0	0	2.19144	1.83881	0.919119	0.684393	1.62598	0.686718	0	0	0	0	0.460833	0	0	1.36249	0.743048	2.864	5.34784	0.747678	1.61211	0	0.924536	0.377317	0.492503	0.684533	0.462051	1.59986	0	0	0	0.433716	0	1.291	0.543267	0
WP_025075971.1	MAFTNNIMIVRHKLLADLVRLWKTDQLVEKIDRLPIELSPRKSKPMGRCCVHKERAVWKYKTFPLMGFDMTDEHDELTPLSDYAKIALNRPEPVKENIMCVIDEACSSCVQINYEISNLCRGCVARSCYINCPKDAIRFKKNGQAMIDHDTCISCGICHKSCPYHAIVYIPVPCEEACPVKAISKDEHGIEHIDESKCIYCGKCMNACPFGAIFEISQTFDVLQRIRKGEKMVAIIAPSILGQFHTSIDRVYGAFKEIGFTDIIEVAEGAMMTTSNEAHELLEKLEEGQPFMTTSCCPSYIELVEKHLPGIKPYVSSTGSPMYYAARIAKEKYPDAKIVFVGPCVAKRKEVRRDEAVDFILTFEEVGSILDGLDIQLEEVQTFSVVQTSVREAHGFAQA…	[FeFe] Group B	[FeFe] Group B	Evolving	Labile	1	[FeFe]-centre, 3 x [4Fe4S] clusters, 1 x [2Fe2S] cluster	None	1.46624	1.50957	0	2.325	2.82617	0	0	1.09572	0.919403	8.27207	0	0	2.06015	0	0	0	2.99768	0	1.51208	0	0	1.85762	0	0	0.498452	1.07474	2.09655	0	0.377317	0	4.79173	0	0	0.339987	0	0	0	0	0	3.80287	0
WP_014254276.1	MSRRTIIPFGPQHPVLPEPIHLDLVMEDEKVVEAIPSIGFVHRGLEKLVEKKDFIEYIYVAERICGICSFMHGMGYSQAIEQIMNIEVPERALFLRTIWAEFSRIHSHLLWLGLLADAFGFESLFMQSWRVREKVLDIMEETTGGRVIFGSCKIGGVRKDIDTVTLKRIEKVLVDLEKEIREISNVFLNEYTVKSRLVGVGVLSKEDAYNLGAVGPMMRASGIAQDMRKLGYGAYSQLDFEPITRASGDSYDRCAVRIEELFQSIDLIRQAIGKIPEGPVDTKVTGNPDGEAFVRLEQPRGEVVYYVKANGTKFLDRLRVRTPTFANIPALLKMLKGCDYADVPILILTIDPCISCTER	[NiFe] Group 4e	[NiFe] Group 4e	Evolving	Sensitive	6	[NiFe]-centre, 1 x [4Fe4S] clusters	NuoL, NuoH, NuoC, [FeS] protein	0.285755	0.219578	0	0	0	0.459812	0	0	0.919403	0	0	0	0	0	0	0	0	4.1475	0	0	4.08747	0	0	0	0	0	0	0	1.50927	0	0	0	0	0	0	0	0	0	0	1.08653	0
WP_005028324.1	MSKTVIAIDPVTRLEGHLKVEVQVEDGKVADAWITGGMFRGFEAILRGRNPRDASQIVQRICGVCPVAHATASSLAIEAVCGVEVPENGRIARNLMLAGNYLQSNILHFYHLGGQDYFHGPDTVPFIPRYRNPDLRLSEEQNTLAMDEYIEALEVRQVCHQLVALFGGRMPHLQGILGGGAAQIPDRETILEYAARMKQVRKFVENRYLPLVYTIASRYMDMFEMAHGYKNALCVGVFPLAKKGEQFFNAGAYINGRDEPFDGNRILEDVRYSWFEPAPSGTPLQKSESNPQVDKEGAYSFIKAPLYAGHRVEVGPLARMWINDKPLSPIGQRFFADMFGVRAETFRQIGEDPAFSIMGRNVARVEEVYQTLGMIEYWLHELEPGAQTFALPEVPQAGE…	[NiFe] Group 1a	[NiFe] Group 1a	Anaerobic Uptake	Sensitive	3	[NiFe]-centre, 3 x [4Fe4S] clusters	Cytochrome	0.68927	15.837	0	3.87499	0	0	1.43897	0	1.3791	0	1.36879	1.62598	2.06015	0	0	0	0	0.460833	3.02417	0	0	0.495365	0	0	0	1.07474	0	0.924536	0	0	0.684533	0	0	0	0	0	0	0	0	0.543267	0
WP_003530568.1	MLEPVWSLFGAPQLAAGFWVPDRADAYPGGKDAKDLENDQDPFVVPYGARCRRIGGRVTIRKVEEPMRYDNDAKQMKFEVLLRVAQLAYAGDLEEKSDSIPYDIIPGRVARFRCCVYREREILRERVILARGKHLPTNPDGSGTVTVLPAACEGCPINRFTVTANCQRCMAKKCVAACPFGAITVTGSGAYIDPAKCKECGRCAAACPYNAISDTMRPCLRSCPVDAITMDENKQASIKYERCIGCGACTMDCPFGAISDTSSIVEVIEQLKGKKQVYAMFAPAIEGQFGTATVGMLKAALKKLGFDDSFEVALGADAVAQHEAHELKEAIQTGRKMTTSCCPAFFTMIKKHFPKLIPNISSTVSPMTATARYVKYLHPHALTVFIGPCIAKKQEIQHV…	[FeFe] Group B	[FeFe] Group B	Evolving	Labile	1	[FeFe]-centre, 3 x [4Fe4S] clusters, 1 x [2Fe2S] cluster	None	5.90775	9.33677	84.9516	6.97499	2.82617	3.67849	0.479656	2.19144	2.29851	4.59559	2.05318	1.62598	8.24061	0	0	0	11.9907	0.460833	4.53625	1.57458	8.17495	5.20133	1.432	0	1.24613	8.5979	8.38618	29.5851	0	11.3276	3.25153	6.46871	1.59986	2.03992	2.11745	0	1.30115	0.774432	1.291	4.8894	0.643165
WP_014261748.1	MNQLYTDIIQIRQNVFAEITRIAYSDEDLIEALENAPMKILPGEVSERRQSIFKERAIVGERLRLTLGLPVRKASEFRRLSEGIKAIDETERVYEAPLVNVIPFACNACPTKALEVTSTCRQCMAHPCIQVCPVGAITMGETQTHIDKEKCIKCGKCKEACPYNAIIQYDRPCAEACGVNAIGSDEYGRALIDHDKCVSCGQCMAHCPFGAIADKAQIYQLVKSIRNKKQKHIAIVAPAFVSQFGDKITPAQVFEGIKMLGFDDVVEVGLGADIATINEAKEFLHVVPNELPYLATSCCPAWVSMVNKMFPEVVPQVSDALSPMKFTVQHIRKTDPDVKIIFVGPCVAKKLEALGEEMKSYVDFVITFEELMGMFVGKGIDLAAIETDNVINDSSAIGR…	[FeFe] Group B	[FeFe] Group B	Evolving	Labile	1	[FeFe]-centre, 2 x [4Fe4S] clusters	None	8.51681	9.98311	6.1783	6.19999	7.06543	4.1383	20.1455	10.9572	15.1702	7.35295	4.79075	1.62598	5.49374	4.6587	3.12725	3.22908	0	9.21666	16.6329	1.57458	7.72078	3.5914	4.29601	7.13046	3.98762	4.83632	9.78388	18.4907	10.1876	17.2376	8.04326	9.70307	10.3991	15.9794	15.8809	9.51988	18.6498	6.96989	10.7584	3.80287	8.36114
WP_006059864.1	MSYIQLSEANCRNCLRCVRVCPTKAMTYQNHQPTILEDECILCGKCYAICPHSAKKVHSDGDQVRAWIAQGQPLALSIAPSFASVWPDYPRLKRQLKAIGFQVVEETAVGARLVSQAYMKLIEEHQMKNILSTCCPAVVTYVEKNFPELIDQLAPVVSPMIAHGYDLKERYPGVKTVFLTPCIAKQKEAADPRFAGAVDAVLTMPDLSAWLKEAPVDEPEEQAEEIRWETMKTSTVRMYPTPGGVIRTLSSSDEVYERVSAEGMDRVKDALKSIAQGHMEGYFFELSACEQSCLGGPLLCHVDHSEWRARSAIRRNMDPQDQVRQAELPANLRAAWQADPVERTSHTEEEIKDMLFLMGKTSKEKELDCGACGYESCRAKAIAVLEGKADPKLCLPYAL…	[FeFe] Group C	[FeFe] Group C3	Sensory	Labile	3	[FeFe]-centre, 2 x [4Fe4S] clusters, PAS domain	Phosphatase, thioredoxin	1.29992	1.34156	1.54457	0.774999	1.41309	0.459812	0	0	0.459702	0	0	0	0	0	2.60604	0	0	2.30416	3.02417	0	1.36249	0.123841	1.432	0	0.996904	0	3.49424	9.24536	0.377317	0	2.0536	6.46871	0	0	0	0	1.30115	0.774432	0	1.6298	0.643165
WP_006778965.1	MENITIKINGTEVSAPKGSTILEAARIAHIEIPTLCFLKEINEIGACRMCVVEVKGARSLVASCVYPINPGMEVFTNTPKVLDSRKKTLQLLLSNHERKCLSCVRSGNCELQTLAKELGVEDEAYYDGAVTQSCPDDSAAHMIRDNSKCILCRRCVAVCEKVQGIGVIGANDRGFDTNIGSAFKMGLGETSCVSCGQCIAVCPTGALREKDYIDDVLAAIADPDKHVIVQTAPAVRAGLGEEFGYPIGTNVEGKMAAALRRIGFDKVFDTNFSADLTIMEEAHEFIERVQHGGVLPMITSCSPGWIKYCEHYFPDMTENLSSCKSPQQMFGAIAKSYYAEKQGLKPKDIVSVSIMPCTAKKFEIGRNDQAANGVPDVDYSLTTRELARMIKKLGIRFNE…	[FeFe] Group A3	[FeFe] Group A3	Bifurcating	Labile	4	[FeFe]-centre, 3 x [4Fe4S] clusters, 1 x [2Fe2S] cluster	NADH dehydrogenase, thioredoxin, thioredoxin	5.6571	10.3605	4.11887	5.42499	7.06543	10.5757	0.959312	1.09572	5.51642	14.7059	4.79075	3.25196	6.18046	2.32935	2.60604	0.53818	11.9907	3.68666	3.02417	6.29831	4.9958	5.07749	5.72801	3.56523	2.74149	3.22421	1.3977	31.4342	1.50927	8.37255	1.5402	5.54461	0.799931	5.09981	3.17617	2.97496	3.03601	2.3233	0.86067	7.06247	1.92949
WP_027356646.1	MSTGKVTVDGRVVEIGDARNILEVVRRAGIKLPTFCYHSELSVYGACRMCMVEVEGRGLVASCSTPPVDGMVIHTSTPRTRRLRRMIIELLLANHDRECTSCERSGSCKLQQLARQMGITEVRFGQRDKKLPVDDTSPAIVKNPNKCILCGDCVRMCKEIQGLGIWDFAFRGSKTRVTTAFGKPLQEVACVNCGQCVAVCPTGALTVKPEVDRVWDAIHDPEKLVVVQVAPAVRVAIGEEFGLLPGEKATGQLVAALRKIGFDRVFDTLFTADMTTIEEGMELLGRLEKGGRLPLFTSCCPAWVKYAEQFHADLLDNLSTCRSPQQMFGSLVKKFYAREMGRTPEQVVCVSVMPCTAKKFEARRPEFTTGGVPDVDFVLTTMELARMIREAGIVFNELE…	[FeFe] Group A3	[FeFe] Group A3	Bifurcating	Labile	3	[FeFe]-centre, 3 x [4Fe4S] clusters, 2 x [2Fe2S] cluster	NADH dehydrogenase, thioredoxin	0.182692	0.030273	0	0	0	0	0	1.09572	1.3791	0.919119	0.684393	0	0	0	1.04242	0	0	0	0	0	0.454164	0.123841	0	0	0	0	0	0	0	0	0	0.462051	1.59986	0.339987	0	0	0.867433	0	0	0.543267	0
WP_028828670.1	MSTVNVKINNISYQFPKGLTILQACNQINIEVPTLCYLKEINEIGACRICVVEVKGAKNLVASCVHPLSEGMDILTHSEKVLKARKITLELILSTHDRSCLSCIRSDNCELQKLCHDFKVDDEAKYDGHNQVYKTDDSAIHMYRDDNKCILCRRCVAACSKLQSVGVIGVNERGFKTHIGCAFEEDLGKTDCVSCGQCIVVCPTGAIAEKDDTDKVWAALADESKHVIVATAPSIRVTLGEAFGMPVGTNVKGKMVTALKHLGFAGVYDTDIAADLTIIEESQELITRIQNGGPLPLITSCSPGWIKFCEHNFHDFIPNLSSCKSPQQMFGAVVKTWYAEKNNLDPHDIVVVSVMPCTAKKFEARRDNQSAAGVYDIDIAITTRELARMIKRAGIQFKK…	[FeFe] Group A3	[FeFe] Group A3	Bifurcating	Labile	3	[FeFe]-centre, 3 x [4Fe4S] clusters, 1 x [2Fe2S] cluster	NADH dehydrogenase, thioredoxin	3.94442	4.65876	5.66344	3.09999	0	9.19623	0	0	2.75821	2.75736	6.15953	0	0	0	0	1.61454	2.99768	1.3825	1.51208	0	2.27082	2.47683	4.29601	1.78261	10.2183	2.14947	1.3977	7.39628	0.377317	10.8351	1.88247	1.8482	0	0.339987	1.05872	0	1.73487	0.774432	1.291	1.6298	0.643165
WP_013823947.1	MVTLTIDGLKVQAEEGSTILEAARRANIRIPTLCYLPEVQAIGACRVCLVEIEGNRNLQPACVFPVSEGLVVHTNNVRVRRARKFSVEMILSDHPMDDCLTCTRNQRCELQKLADELGIREVKFTGEKSEGRLDNLSPSIVRDQSKCILCRRCVTVCKEIQEVAAISIQGRGFKTRVEPAFGESLNDVACALCGQCILVCPVGAIHEKEHIEEVWHAIFDPSKFVVVQDAPAVRAALGEEFGYPPGTLVTGKMLAAVRRLGFDRVFDTNFAADLTIIEEGHELLKRIKEGGVLPMITSCSPGWVKFIEHFYPELLPHLSTCKSPHQMLGALVKTYYAQKVGVDPKDMVVVSVMPCTAKKFECNRPEMNGSGYKDVDYVITTRELAKMIKQAGIDFASLE…	[FeFe] Group A1	[FeFe] Group A1	Evolving	Labile	2	[FeFe]-centre, 3 x [4Fe4S] clusters, 1 x [2Fe2S] cluster	Thioredoxin	0.402925	0.336864	0	0	0	0.919623	0	0	0	0.919119	0	1.62598	0	0	0.521209	0	0	0	0	0	0.454164	0.247683	0	0	0.498452	0	0	0	0	0	0.342266	0.462051	0	0	0	0	0	0	0.430335	1.6298	0.643165
WP_010251391.1	MDNNIIISKEEKCVGCNKCIYVCPVEGANISYIKDGKSYTKIDESKCITCGSCINACDHQARSYQDDLESFLNDLKNGEKISILAGPAFKISFPNYQQILGFLKSLGVINFYDVSIGADITTWAYLRAIKDRNLKSVVAQPCPAVVNYVQKYRHEILPYLSPIHSPMMCTAIYLNKYLKVNDKLGFLSPCIAKKSEMQDPNTNKLVKYNITFKNLFDYIKSKGIDLSSFSKWDFAVHSYLAGDIYSMPGGLKENVCLYTKDAFIKQVEGPQQAYKYLDEYAQRCTSGNTLPLLVDILNCQNGCNIGTGTIKENSITELEEKVHSLKTNKSSKFNKNPQNLFKYFNKELKLEDFTRNYSKEDIGLPKEPSEADYNNIFSKMLKTTYEDKNKNCFSCGYGN…	[FeFe] Group C	[FeFe] Group C2	Sensory	Labile	1	[FeFe]-centre, 2 x [4Fe4S] clusters, PAS domain	Fusion with methyl-accepting chemotaxis protein	97.9541	135.555	58.179	60.4499	73.4805	14.2542	35.0149	33.9673	77.6896	34.9265	58.8578	104.063	32.9625	20.9641	106.848	218.501	101.921	89.4016	169.353	234.612	208.007	150.343	54.4161	162.218	45.8576	62.8721	94.3446	35.1324	15.8473	151.691	75.1275	43.4328	39.9965	105.396	218.097	193.967	39.4682	32.5262	24.5291	27.7066	57.8848
WP_011341365.1	MSMMNITIDGKATQVPAGSTILDAAKKLDVHIPTLCFLQMDEMKFNNMTASCRICVVEVEKRRNLAPACATPVMDGMVVKTNTIRVLNARRSVLELMLSDHPKDCLVCAKSGDCELQNLAEYFGIREVGVAGAMSTYREDVSPSIIRDMDKCILCRRCETMCNDVQTCGVLSGVNRGFDAVVAPAFEMNLYDTVCTNCGQCTAVCPVGALVENDHTWKVIDAIADPEKVTVVQTAPAVRAALGEACGMEPGQSVTGKMAAALRRLGFDHVFDTDFAADLTIMEEGSEFLDRLQKFLDGDKNVRLPIMTSCCPGWVKFFEHQFPDMLDVPSTAKSPQQMFGAIAKSYYAEILGIPREKMVVVSVMPCLAKKYECSRPEFAVNGNPDVDIVISTRELGRLI…	[FeFe] Group A3	[FeFe] Group A3	Bifurcating	Labile	4	[FeFe]-centre, 3 x [4Fe4S] clusters, 1 x [2Fe2S] cluster	NADH dehydrogenase, thioredoxin, thioredoxin	0.296758	0.26339	0	1.55	1.41309	0	0	0	0	0	0	0	0.686718	0	0	0.53818	0	0	3.02417	0	0	0.495365	0	0	0	1.07474	0	0	0.754635	0	0.342266	0.924102	0	0	1.05872	0	0	0	0.430335	0	0
WP_027129041.1	MINFSSIGSIFSNIAGPELKKALSQGRNVVAISGMVVKPGVYDILETTTLSELIEMAGGITGHKKFKAAQFGLPFRNLVQEDYLDKPIDLELFEDGSTRNIIILSEEDCMVSFSKFYLEYLLANKQRRGYLEYSKVENEMERSWRTLDRISKGKGNIRDLFLLRQLCGAIKDTLGRKRNLVLESLDKFYHEFEEHVENKTCPAGQCIQLLQFKITDKCIGCTACARACPVGCISGSIKQKHTIDNDKCTHCGQCVIACPVGAIFEGDHTTQLLRDIATPNKIVVAQIAPAVRVAIGEAFGYEAGENVEKKLVAALKAIGIDYVFDTSWAADLTIMEEAKEFQERLEKYYEGDPNVKLPILTSCCPAWIKFFEQNYPDMLDVPSTVKSPMEIFSTVAKDI…	[FeFe] Group A1	[FeFe] Group A1	Evolving	Labile	1	[FeFe]-centre, 2 x [4Fe4S] clusters	None	0.251526	2.55486	0.514858	0	0	0.919623	0	0	0.459702	0	0	0	0	0	1.04242	2.6909	0	0.460833	0	1.57458	0.454164	0.123841	0	0	0.249226	0.537368	0	0.924536	0.377317	0	0	1.38615	0	0	0	0	0	0	0	1.6298	0
WP_029725248.1	MVALTIDNLAVEVPEGSTILEAARSAGIHIPSLCTLAEIQHSPGACRVCVVEVERARSLVASCVYPVANGMKVKTNTRRVREARQQVIGFLLSDHPKDCNICQKHGNCELQQVAELVGQREITVPCTDFIVHDIDDSTDVLVRDMAKCIHCLRCVTVCADVQGVSLLTPEGRGFDSRVVPAMGHCLADSACTFCGQCTVVCPTGAIVEKDHTDRVWAALEDPAKHVVVQEAPAIRAQLGEEFGMAPGNLVTGKMITALRRLGFDRVFDTNFTADLTIVEEGHELLHRAKTGGKLPMITSCSPGWIKFIEHFYPDLLPHLSTCKSPQQMFGALAKTYYAQKQGIDPADIFVVSIMPCTAKKFEATRPEMRSSGHRDVDVVLTTRELGRMLRQAGIDLAIL…	[FeFe] Group A3	[FeFe] Group A3	Bifurcating	Labile	3	[FeFe]-centre, 3 x [4Fe4S] clusters, 1 x [2Fe2S] cluster	NADH dehydrogenase, thioredoxin	0.260407	0.144552	0.514858	0	1.41309	0	0	0	0	0.919119	0	0	0	0	0	0	0	0	0	0	0	0.371524	0	0	1.99381	0	0.698849	0	0	0	0.171133	0	0	0	0	0	0	0.774432	0.86067	1.08653	0
WP_006778913.1	MVTNDATVLRIKHDVLYEVAKLAWEGALDEKKEDIPYKLIPGPQARFRCCIYREREIIRQRVRLAEGLCPADGKDTTNIVQVIGAACEGCPIARFTVTDNCQLCMGKACQNSCNFGAISMGRDRAYIDPDKCKECGKCAQACPYNAIADLTRPCRKACPVDAITMDENGLVEIDESKCIQCGACIHGCPFGAIGSKSFMVDVIDMIRAGKKVVAMVAPATEGQFGADITMASWKTALKKIGFADMVEVGLGGDLTAAAEAAEWAEAYRDGKKMTTSCCPAFVNMIKQHFPMLLENMSTTVSPMCAVSRMLKEKDPETVTVFIGPCIAKKSETLDLNIKDNADYALTYSEIRAAMKAKNVNLEPEENIYQESSVFGKRFGNGGGVTAAVLECLKETGENT…	[FeFe] Group B	[FeFe] Group B	Evolving	Labile	1	[FeFe]-centre, 3 x [4Fe4S] clusters, 1 x [2Fe2S] cluster	None	12.4773	16.391	7.72287	14.725	21.1963	6.43736	6.23553	21.9144	13.3313	4.59559	16.4254	8.1299	16.4812	11.6467	17.7211	6.45816	17.9861	9.21666	24.1933	18.8949	11.3541	28.9789	5.72801	17.8261	3.48917	14.5089	9.78388	11.0944	4.15049	5.91004	15.402	7.85486	3.19972	5.4398	12.7047	14.2798	0.867433	5.42103	3.01234	2.17307	3.21582
WP_013277266.1	MDTVILTHKDTVRLTIDGQEVEVEKGSTVLEAARELGIELPTLCYHEELTLFGSCRVCEVEDEETGNLMASCVTPVTEGMKIRTNSSKARRARRMNVELLLANHPNECLTCDRNGTCELQQIAYDLGVHDIRFEGDTRDHPIDNDGPCLERDPNKCILCGRCVRVCNEIQEVAALDFTERGFNSTVTTAFDLPQSEINCTNCGQCAVVCPVGAITEVSEISDVWDALEDEDQHVVVQVAPAIQASIGEEFGMEPGTIVTGKLVTALQELGFDKIFSTEFTADLTIMEEGNELLKRIKGQKKLPQFTSCCPGWVKFCEHNYPEYLDNLSTAKSPQQMFSTLAKTYYAEQEDIDPEDIFTVSVMPCTAKKFEKNREEMADSGHQDTDAVLTTREAARMIKE…	[FeFe] Group A3	[FeFe] Group A3	Bifurcating	Labile	4	[FeFe]-centre, 3 x [4Fe4S] clusters, 1 x [2Fe2S] cluster	NADH dehydrogenase, thioredoxin, thioredoxin	0.293101	0.173349	0	0	0	0	0.479656	0	0.919403	0	0	0	0	0	0.521209	0.53818	0	0.921666	0	0	0.908327	0.371524	1.432	1.78261	0	0	0.698849	0	0	0	0	0	0	0.339987	0	1.18998	0	0	0.430335	0.543267	0
WP_007653239.1	MSERIVIDPITRIEGHLRVEAAIENGKIKDAYSSGTMVRGIENIVRDRDPRDAWVFVGRVCGVCTSIHSLCSVRAVENTLGISVPPNAEMVRNIMEAVLYMHDHTVHFYQLHALDWVDIVSGLKADPKAAALLAQQLSPWPKNTEGYFTEMQNKLKKFVASGQLGIFANGYWGHPAYKLTPEQNLIATIHYLEALEWQKEIVKVHAVFGGKNPHPNFLVGGMPCSIDLNEANAINAERLALVKQKLQEGKDFIDQVYIPDLLMIAGVYKDEWSKIGGGVSNYLSYGDFPLHGYAGVEDYMSPRGIVLDRDLSKVHPVDANSPEEIKEYIYHSWYKYTEGDKAGLHPYEGETNLEYTGPKPPYKHLNVDDKYSWIKTPRWKGHAMEVGPLARLVVAYAAG…	[NiFe] Group 1d	[NiFe] Group 1d	Aerobic Uptake	Tolerant	3	[NiFe]-centre, 1 x [4Fe3S] cluster, 1 x [3Fe4S] cluster, 1 x [4Fe4S] cluster	Cytochrome b	6.32883	8.67004	2.05943	6.97499	4.23926	0	1.43897	1.09572	2.75821	67.0957	2.05318	16.2598	6.86718	2.32935	0	0.53818	0	0.460833	1.51208	0	0	5.44902	0	1.78261	19.6889	1.07474	0	0	2.64122	0	13.8618	0	0	0	1.05872	0.594992	0	1.54886	0	0.543267	0
WP_013313426.1	MAKQAKTVTITINGTPLEVEEGTLLVDAASRADVEIPTLCYHEDLSPRGICGICLVKVNGEYVRSCITRVREGMEVVTSDPVIRETRRKILELILATHPDDCLKCIKHGKCELQDLAERLEVRSIPYDKYERGLPVDRTSPSIVRDMNKCIGCGRCIEVCHHVQSVGAIFFHNRGSHTIVANAAGQTMGTSVCVACGQCVVYCPVGALYEKEAVERVWEALADPEKVVVAQIAPAVRVALGEEFGMKPGELVIGKIYAALRRLGVDYVFDTNFSADLTIMEEGTEFLHRLEKGERLPLITSCSPGWIKFAETYYPDLLPHLSTCKSPQQMMGAVVKTYFAQAKGIPPSRIVSLSIMPCTAKKFEAQREEMRDSGFWDVDIVLTTRELARMIRQAGIRFD…	[FeFe] Group A3	[FeFe] Group A3	Bifurcating	Labile	4	[FeFe]-centre, 3 x [4Fe4S] clusters, 1 x [2Fe2S] cluster	NADH dehydrogenase, thioredoxin, thioredoxin	0.351942	0.532337	1.02972	0	0	0	1.43897	0	0	0.919119	0	0	0	0	0.521209	0.53818	0	0	1.51208	0	0	0.371524	2.864	1.78261	0	0	0	0	0	0	0	0	0	0	0	0	0	3.87216	0	1.6298	0
WP_028726954.1	MAFTNNVMIVRHGLMAKLVRLWKENRLLDEIDRLPIELSPRKSKVIGRCCVHKERAVWKYKTLPLLGFDMQDEIDELTPLSEYAKRALLRPENKKENLMCVVDEACSSCVQVNYEITNLCRGCVARSCYMNCPKDAIQFKKNGQARIDHDTCISCGKCHQNCPYHAIVYIPIPCEEVCPVKAISKDEYGVEHIDESKCIYCGKCINACPFGAIFEISQVFDILQRLRNKEQMIAIVAPSILAQFSAPVEKVYGAIKAMGFEEIVEVAQGAMETTRREAEELKEKLEEGQPFMTTSCCPSYVQLAEKHIPDLKKYISSTGSPMYYTARLVKEKYPDCKVVFIGPCVAKRKEVKMDPAVDFTLTFEEIGSILEGLDIKVEEAKPFSILYNSVREAHGFAQS…	[FeFe] Group B	[FeFe] Group B	Evolving	Labile	1	[FeFe]-centre, 3 x [4Fe4S] clusters, 1 x [2Fe2S] cluster	None	8.17696	17.3419	5.66344	14.725	8.47851	2.29906	0.479656	1.09572	1.3791	45.0368	3.42196	16.2598	8.24061	6.98804	4.16967	0.53818	14.9884	0	1.51208	0	0	13.4987	4.29601	1.78261	37.6331	4.83632	0.698849	0	4.52781	0	29.0926	0.462051	0	0	1.05872	0	0	6.19546	0	0.543267	0.643165
WP_027308223.1	MGYTIPIGPYHPSLEEPIHAKLYTEGEVIKDAEVFIGYNHRGIEKLATERNFIQTLTLVERVCGICSHSHPFAYAMAIENIAQMEVPKRGQYIRVIMAELERLHSHYLWIGLACHLIGYDSLFMYVWNARERIMDILEEISGNRVNYGMVIIGGSRRDIDDEKRKKILNMLDDLIEPHNRMKDIFLNDKTAALRTKGVGVLPKDVAERMGTIGPHARASGVNVDVRKDAPYSCYDEFDFNVPVLNEGDVWARVVVRVLEIEESIKIIKQALENLPEGPINLGNKLPKVPAGEFTARHEAPRGQVVYYVVTDGGQTNYRISIHVPTFKTAPTVPYMLKNNTIADAGLIIASIDPCFSCLDR	[NiFe] Group 4d	[NiFe] Group 4g	Evolving	Sensitive	6	[NiFe]-centre, 1 x [4Fe4S] clusters	NuoL, NuoH, NuoC, [FeS] protein	0.212977	0.0282113	0	0.774999	0	0	0	0	0	1.83824	0.684393	0	0	0	0	0	0	0	0	0	0	0.247683	0	0	0	1.07474	0	1.84907	0	0	0	0	0	0	0	0	0	3.09773	0	0	0
WP_015529112.1	MGLSLRPENKPVHLTAGVEASNISEKYYEPPLMQVIPSGCESCEENKYEVSNVCKGCLAHPCQEVCPRGAISMVNGKSFIDQDKCIKCGKCKSVCPYDAIAKKERPCKKACGVNAITSDKLGRAYIDADKCVSCGMCMVSCPFGAISDKSQIFQLARALSEGEEIVAEVAPAFVGQFGPNINVRNFKAALEELGFSETYEVALGADIGAIAEAHHYVNKVTTGELPFLLTSCCPSWAMLAKKFFPDLIDQISQELTPMVATARTIKQEHPNAKVVFIGPCAAKKLEASRRTVRSDVDFVVTFEELQAMFDAKGIDLTAYEAESSFHDATGAGRGYACAGGVAKAIEECINEYYPGTQVNIEHAEGLAECKKILTLAKAGRMNGCLIEGMGCPGGCIAGA…	[FeFe] Group B	[FeFe] Group B	Evolving	Labile	1	[FeFe]-centre, 2 x [4Fe4S] clusters	None	53.0535	66.5746	34.4955	49.5999	32.501	58.3961	39.3318	25.2016	81.8269	62.5001	53.3826	39.0235	56.9976	67.5511	25.018	67.2725	23.9815	32.2583	34.7779	74.0051	55.8621	48.422	24.344	76.6524	19.6889	47.2884	61.4987	153.473	37.3544	43.3403	17.7979	32.8056	50.3956	108.796	60.3473	38.0795	55.5157	24.0074	65.8412	40.2017	91.3294
WP_012282074.1	MMKRHLEEALLPHMLGWDPGEEHPEEHTKPSAFFGPKKVRLEIDGQLVEAEVGTTVLDAAREAGIHIPSLCYLREINEIGACRVCLVEVEGQRALQASCVYPVAEGLKVRTHSPRVRKARRRVVELILSDHQRECTTCIRNLNCELQNIAEDLGIRRIEFQGESRRQPIKDNNPSIRHDLNKCVHCRRCESICAKVQENHVIAAQERGFDTIIAPAFNADMGDVACIMCGQCVLACPVGALTEKESIDDVWKALADPTTHVVVQAAPSIQVTLGEAFGLPVGTKVTGKLVAALRRLGFNQVLATDFAADLTIVEEAYEFLGRYEEGKTPFFTSCCPAWIKLVEHYFPKYIPNLSTCKSPMAMFGALTRAHYPTERGLPPEKVVSVAVMPCTAKKYEAAR…	[FeFe] Group A3	[FeFe] Group A3	Bifurcating	Labile	3	[FeFe]-centre, 3 x [4Fe4S] clusters, 1 x [2Fe2S] cluster	NADH dehydrogenase, thioredoxin	0.467986	0.367543	0.514858	0	1.41309	1.37943	0	0	1.3791	0	2.05318	0	0	0	0.521209	0	0	0	3.02417	0	0	0.371524	1.432	0	1.49536	0.537368	0.698849	0	0	0	0	0.462051	0	0	0	0	0	0	0	1.6298	0.643165
WP_016822145.1	MNADRCVICGQCVQICSVYASDWADSSPQAAAIRRQERIRERDMPADIGEPLFAAYYSYNLNKVADMMKKPGQLRIVQCAPAIRVSLAEEFGMPFGTLTPGKMAAALRRLGFDRVYDTNFGADVTIMEEGTELIRRVTEGGPLPMFTSCCPAWVRFAEIEYPDLLDHLSSCKSPMQMVGALIKTYGAQLDEVEPANIYSVAIMPCTCKQFECDRPEMESDGYRDVDEVLTTRELAYWIKQRGIDFMNLPDEEFDAPLGQYSGAGTIFGVTGGVMEAAIRTGYELLTNEKLPKLQLDFVRGEEGIRVAEVQVGELQLKVAVVAGLQHAYQLLDRVQAGECDYHFIEVMGCPAGCISGGGQPKLMLEKQKIDAYRARKSSIYGHDAASQVRKSHENPFIIK…	[FeFe] Group A4	[FeFe] Group A4	Evolving	Labile	3	[FeFe]-centre, 2 x [4Fe4S] clusters	FeS protein, FeS protein	0.339564	0.120695	0	0	1.41309	0	0	3.28716	1.3791	0	0	0	0	0	0	0	0	0	0	0	0.908327	0.123841	0	5.34784	0.498452	0	0	0	0	0.985006	0	2.7723	0	0	0	0	0	0	0	0	0
WP_005990603.1	MSMLTITIDGKTTSVPEGSTILDAAKTLDIDIPTLCYLNLEALSINNKAASCRVCVVEVEGRRNLAPSCATPVTDNMVVKTNTLRVLNARRTVLELLLSDHPKDCLVCAKSGECELQTLAERFGIRESPYDGGEMSHYRKDISASIIRDMDKCIMCRRCETMCNTVQTCGVLSGVNRGFTAVVAPAFEMNLADTVCTNCGQCVAVCPTGALVEHEYIWEVVEALANPDKVVIVQTAPAVRAALGEDLGVAPGTSVTGKMAAALRRLGFDHVFDTDFAADLTIMEEGSEFLDRLGKHLAGDTNVKLPILTSCCPGWVKFFEHQFPDMLDVPSTAKSPQQMFGAIAKTYYADLLGIPREKLVVVSVMPCLAKKYECARPEFSVNGNPDVDIVITTRELAKL…	[FeFe] Group A3	[FeFe] Group A3	Bifurcating	Labile	4	[FeFe]-centre, 3 x [4Fe4S] clusters, 1 x [2Fe2S] cluster	NADH dehydrogenase, thioredoxin, thioredoxin	0.216896	0.0330739	0	0.774999	2.82617	0.459812	0	0	0.459702	1.83824	0	0	0	0	0.521209	0	0	0	0	0	0.454164	0.247683	0	0	0.249226	1.61211	0	0	0	0	0	0	0.799931	0	0	0	0	0.774432	0	0	0
WP_012547917.1	MILTQEISCQYCYKCLRNCPVKSIMFNRGKSYVIDDECILCGVCIEVCPQRARTYVRSTHLLDSFKGKPFLVSIAPSFFAHFDEPFKVITFLKNLGAVAVQETAVGADIVSHHYKKFIEGRKKTFITTACPVVFELAEKYYPEVIPYLAPFLSPMNVHAIFMKNYFGDFPVVYFGPCIAKKRDGEDYVDLAMTYEELSSYIERSNVNIEELEESFPTPPYPQRGRVYPVSGGINSTLEGSWENYLVVEGVENIIRVFENISSYGEGFVIEASSCFGGCINGPAIRKDIGILEKRRRILSYMEKLREVEGESIKPQLIDLDIKRNFSSQKKIIEIPEERIRKVLREMGKDNPKKELNCGACGYPTCRDKAIAVILGKAEKEMCITYLIDKVSSVSNAIIE…	[FeFe] Group C	[FeFe] Group C3	Sensory	Labile	2	[FeFe]-centre, 2 x [4Fe4S] clusters, PAS domain	Phosphatase	0.225726	0.0267735	0	0	0	0	0.479656	0	0	0	0	0	0	0	0	0	0	0	3.02417	0	0	0	0	3.56523	0.747678	0.537368	0	0	0	0.492503	0	0	0	0	0	0	0.433716	0.774432	0	0	0
WP_027090514.1	MRGIYSSLTKIRRKVFVEVAKLAYEGNDYSRIEDLPYKIIPGEIATYRDSIFLERAIVGERLRLTMGLSLRPIDKPAPISKGIEDSIIADKYYEPPLINIIKFACNKCAEKKFEVSNGCQACLAHPCMEICPKKAISFKEGKAYIDQDKCIKCGLCKNACPYDAILKKERPCAKACGMNAIESDEYGNAQINYDKCVSCGMCLVSCPFGAIADKSQIFQLIQAIKEGDEIIAAVAPAFIGQFGAKVTPEILKKAMQELGFKDVVEVAIGADLCTIDEAKDFLEKVPDKQPFMATSCCPSWSMMAKKEFPEFKSYISMALTPMVLTARLIKEKHPNSRVVFIGPCAAKKLEASRKSVRSEVDFVLTFEEIGAMFEAKGIDFASLQPNEDDPFTQASSDGR…	[FeFe] Group B	[FeFe] Group B	Evolving	Labile	1	[FeFe]-centre, 2 x [4Fe4S] clusters	None	22.9154	48.0558	13.9012	20.925	14.1309	23.9102	46.047	30.6802	29.8806	14.7059	17.7942	14.6338	56.9976	27.9522	19.2847	5.3818	11.9907	22.5808	22.6812	12.5966	15.8957	13.3749	4.29601	21.3914	9.47059	15.0463	11.8804	32.3587	32.4493	27.5802	14.2041	33.2677	27.9976	38.7586	25.4094	20.2297	49.01	17.8119	35.2875	7.60573	36.0172
WP_003493657.1	MDYINFKKANCKNCYKCLRSCPVKAIKFNNHQAKIEMERCILCSRCVLVCPQNARKVVNYLDKVKKALNKKEKIVASIAPSFMGNFNVSHGKIVASLKSLGIKYAEETALGADITTKLYKSFIKENKQDYYITTACPSVNLLVEKYYPELVKYMLPFMSPMTCHGKILKTIYGEDSFTLFIGPCTAKKAEHENYNFENSIDAVLTYEEYLNLLKEYNICIENLESMEFDNKSLKLGSYYPMPGGIISNLKDELKDKNIKSFYVDGVYACMDIFESIKKGHIKNSFIEASACVGSCIGGPEVITNNHEYYNKLEKVQNYIENRQNYIKSYENKADKQNNLESSKLNFHRGFVDKSIDKEIQYEEQIKNILKSMGKYSKEDELNCGVCGYNTCIDKANAIL…	[FeFe] Group C	[FeFe] Group C3	Sensory	Labile	2	[FeFe]-centre, 2 x [4Fe4S] clusters, PAS domain	Phosphatase	0.187635	0.081952	0	0	0	0.459812	0	1.09572	1.3791	0	0	0	0	0	1.04242	0	0	0	0	0	0	0.247683	0	0	0.747678	0	0	0	0.377317	0.492503	0	0	0	0	0	0	0	0	0	0	0
WP_019880479.1	MKTIYTAEVNCRDCHKCVRICPVKAIGIVNGHATLVANNCIFCGRCVQECPRGAKKVIDNSYKLLDLPKDKQRILSLAPSFIAAFPEYSFEELVSNLHKIGFDYVQETAVGAEIVSYAYKAELEQAKGPLISSCCPVTVNLIEKYYPTLVKYISPTRSPMLAHTALLREKFGQDAYIVFAGPCIGKFQEAESYPEIVDLVITFEHLKNLLKALPSELLNTKLPLDSLPELVEAPATANARFFPIRGGVIKSFMFSEETDIDIFSVSGIEDCMEVFDNLVSGDIKPRFIEAMACRGGCISGPCMLKNKCQPVKRMQVIKFATLSYSNFKDYQEFLPKIKRTFTPKPLKLKEPTEREIRDILRKIGKYSPADEKNCGACGYNTCREKAIATFQGLAEADMC…	[FeFe] Group C	[FeFe] Group C3	Sensory	Labile	2	[FeFe]-centre, 2 x [4Fe4S] clusters, PAS domain	Phosphatase	0.265173	0.0613507	0.514858	0	1.41309	0.459812	0.479656	0	0	0.919119	0	1.62598	0	2.32935	0.521209	0	0	0	0	0	0.454164	0.123841	1.432	0	0.498452	0	0.698849	0	0	0	0	0	0	0	0	0	0	0	0	0.543267	0
WP_020815562.1	MSTVNITIDGKKLQVEQGITILEAARQASIKIPTLCFLKDINEIGACRMCLVEIKGARALQASCVYPVAEGLEIYTQSPAVREARKVTLELILSNHDKKCLTCVRSKNCELQNLAEELNIKDIRFEGDSTNLPLDDFSPSIVRDPNKCVLCRRCVSMCKNVQTVSVISAAERGFKSTISCAFDRSLADVPCTMCGQCISVCPVGALREKDDTEKVWSALDDKELHVVVQTAPAVRVALGEEFGLPIGTRVTGKMAAALNHMGFAKVFDTDTAADLTIMEEGTELLNRIKNGGKLPVITSCSPGWIKFCEHNYPEFLENLSSCKSPHEMFGAVLKTYYAEKMGIDPKKIFVVSVMPCTAKKFEAQRPELSATGLPDVDVVITTRELARMIKEAGIDFNNL…	[FeFe] Group A3	[FeFe] Group A3	Bifurcating	Labile	4	[FeFe]-centre, 3 x [4Fe4S] clusters, 1 x [2Fe2S] cluster	NADH dehydrogenase, thioredoxin, thioredoxin	0.300358	0.229503	0	0	1.41309	0	0.959312	0	0	0	0.684393	0	0	0	2.08484	0	0	0	0	0	0	0.743048	0	0	0.498452	0	0	0.924536	0	0.985006	0	1.38615	0	0	0	0	0.433716	0.774432	0.430335	0	0.643165
WP_020815721.1	MDMINLKIDGFDVSVPKNTTILEAAKQLNIDIPTLCFMKGVNEPGSCRVCVVEVAGWRGLHPACVTKVSEGIVVKTATSTVREARKNILELIMANHNRECLSCPRNLKCELQTLCNDNGIDAIPYEGKVDKGCLDTSGPIVRDPNKCVLCGRCVSVCSKIQDVSAIDFAFRGAHMTVTTAYEEGLANQECINCGQCIKICPVGALQERDDTEKVWKALENPELHVVVQTAPAVRVALGEEFGFAPGTNVEGEMVTALRRLGFNKVFDTNFSADLTIIEEGNELIDRIKNGGKLPLITSCSPGWIKYCEHNYHDFIENLSSCKSPQQMFGAIAKSYYPIKTDVDPKSVFVVSVMPCTAKKYEADREEMNVDGLKDIDAVITTRELAKMIRQAGIKFAELE…	[FeFe] Group A3	[FeFe] Group A3	Bifurcating	Labile	4	[FeFe]-centre, 3 x [4Fe4S] clusters, 1 x [2Fe2S] cluster	NADH dehydrogenase, thioredoxin, thioredoxin	0.221158	0.0709362	1.02972	0	0	0	0.479656	0	0	0	0	0	0	0	1.56363	0	0	0	1.51208	0	0	0.123841	1.432	0	0	0.537368	0	0	0.754635	0.492503	0	0.462051	0	0	0	0	0	0.774432	0	0	0
WP_018962522.1	MYYHSVTLDEEKCRGCTNCIKRCPAEAIRVRGGKARIIDELCIDCGECIRACPNHAKIAITDSWDLMDRFQYRIALPAPSLYGQFKNPDINRILTALLQIGFDDVFEVALGADIISHLTREEINRGDLKKPVISSSCPAVVRLVEIRFPSLLGNVLDLCTPMEASAMLAKDAAQKKTGLKREDIGVFFISPCGAKVTSVRRPIGVENSEVDGVFSLTSVYEKIASKVNHIEHPLPLSKASMVGVAWARSGGEAAGTMLENSIYVDGIQNVIKVLEEIELGKMEDLDFLEAMACVGGCVGGPLTVENNFVAQQRIKRLSERMQRESFVDKMTEQELVDEDKPDLERLRWSRSLERSNAMELSDDIGKALSMMQQIDEVLKTLPGLDCGSCGAPTCKTLAE…	[FeFe] Group C	[FeFe] Group C1	Sensory	Labile	2	[FeFe]-centre, 2 x [4Fe4S] clusters, PAS domain	Histidine kinase	0.568099	0.578164	0	1.55	0	2.29906	0	0	0.459702	1.83824	0.684393	0	0.686718	0	0	0	0	0.921666	1.51208	0	0.908327	0.99073	1.432	0	0.747678	1.07474	0.698849	1.84907	0	0	0.171133	0.924102	0	0	0	0	0	0	0	1.08653	0.643165
WP_008157836.1	MSERIVVDPLTRIEGHLRIEADIENGKIKDAYSSGTMVRGIETIVKDRDPRDAWVFVGRVCGVCTSIHSLCSVRAVENAFNIVIPPNAQMVRNIMTAVLYMHDHVVHFYQLHALDWVDVVSALKADPAEASLLAQKLSPWPKSSTGYFTALKERLNKFVGSGQLGIFANGYWGHPAYKLTPEQNLIAVAHYLEALEWQKEIVKVHAVFGGKNPHPNYLVGGMPCSIDLNEANAINTERLALVKQKLQEAKTFIDQVYIPDLLMIADVYKDEWSKLGGGVKNYLAYGDFPMYEYGETENYKMPRGIVLDRDLSKVHPVDANSPEEIKEYIYHSWYNYTQGDKAGLHPYEGETNLNYTGPRPPYTHLNVEDKYSWIKTPRWKEEPMEVGPLARMIVAYAAG…	[NiFe] Group 1d	[NiFe] Group 1d	Aerobic Uptake	Tolerant	3	[NiFe]-centre, 1 x [4Fe3S] cluster, 1 x [3Fe4S] cluster, 1 x [4Fe4S] cluster	Cytochrome b	1.77315	3.87073	0.514858	5.42499	0	0.919623	0	0	0	1.83824	0	8.1299	2.06015	6.98804	0	0	2.99768	0.460833	3.02417	0	0	2.22914	2.864	0	17.1966	1.61211	0	0	0	0	6.84533	0	0	0	0	0	0	0	0	6.5192	0.643165
WP_015528722.1	MVNITIDNQKISVPSGTTIMEAAAKLGTPIPKLCYLKDINEIAACRVCVVEIEGKDRLVTSCNNVVTEGMVIYTNSPKVRIARRQTVQLILSQHDCKCATCVRSGNCTLQQVANDLNLIDLPFKERFEDTPWDKTFPLIRDSRKCIKCMRCIQICDKIQGLNIWDVTSTGSRTTINVNGNKKINEVSCSLCGQCITHCPVGALRERDDTEDVWSAIADKKKVVVAQVAPAVRAAWGEALGLSREEATSGKIMDALKKIGVDYVFDTSFSADLTIMEEGNEFLQRFTKGELKLRPMFTSCCPGWIRFIKSQYPHLVPQLSTAKSPQQMFGAIMKTYFAQSIGVAPEDIYTVSVMPCVAKKGERNMELFYGEYAGHDIDTVLTTRELTRMIRAAHIDPKIL…	[FeFe] Group A2	[FeFe] Group A2	Evolving	Labile	2	[FeFe]-centre, 3 x [4Fe4S] clusters, 1 x [2Fe2S] cluster	NADH-dependent glutamate synthase	80.4053	105.692	47.3669	68.1999	66.415	65.7531	37.8928	63.5518	154.919	42.2795	70.4925	73.1691	19.9148	165.384	43.2603	103.331	47.9629	30.415	27.2175	162.181	124.895	58.2054	60.1441	121.218	30.1564	92.4274	78.2711	18.4907	80.7459	93.5756	55.9606	46.6671	138.388	121.035	106.931	96.9837	61.5877	25.5563	93.3827	9.23553	191.663
WP_013403323.1	MKNLHSIMLDKEKCKGCTNCIKRCPTEAIRVRNSKARIIDQRCIDCGECIRTCPYHAKYAITDSLEEINKFQYKVALPAPSFYAQFEVDDVNKLLYALLELGFDDVFEVAKAAEIVTHFTKQFILSEKNKKPIISSACPAVVRLIQTKFPDLIENILPLASPMEVAAYIAKKKIHKEKGIEEDKIGAFFISPCAAKMTYVNSPLGFERSYVDGVIAIKDVYGLVRSKLREIKDVKPLSIASGKGIGWAASGGESLALEIEEYVNVDGIHNVAKVLEEIENGKLKDITYFEGLACSGGCVGGPLAVENPYVAKNRIKRLSSKLKDKEESLSAWTEEIINSFSLKLEDVLFEKELETNPVLELDSDIERAMEKFEKVNNILNMLPGLDCGACGSPTCKTLA…	[FeFe] Group C	[FeFe] Group C1	Sensory	Labile	2	[FeFe]-centre, 2 x [4Fe4S] clusters, PAS domain	Histidine kinase	0.143404	0	0	0	0	0	0	0	0	0.919119	0	0	0	0	0	0	0	2.765	1.51208	0	0	0.123841	0	0	0.747678	0	1.3977	0	0	0	0	0	0	0	0	0	0	0	0	0	0
WP_020074005.1	MVTVTINHKVYEVEEDSTILDAAASVGIHIPTLCYLKGINEIGACRVCVVELAGKDKLVASCNNRVQEGMVMYTNSPRVREARRGIVELILSQHDCYCSTCVRSGNCGLQRIANDLGILDPPYQRELPVSEWNKRFPLIRDFSKCIKCMRCIQVCDEIQGMHIWDVANTGSRTTVDVTWNRKIEDSDCALCGQCITHCPVGALRERDDTEKAFAALADPDKITVVQIAPSVRAAWGEPFGLPREQATVKRLVAALRRMGFRYIFDTNFAADLTIMEEGSELLEKLGRPEAARFPMFTSCCPGWVRFLKSQYPDMVGNLSSAKSPQQMFGAVAKSYYAELLNVDPKRIYSISVMPCLAKKDECAQKVLNDAGAGQDVDLVLTTREIDRMIRAEHVLVSEL…	[FeFe] Group A2	[FeFe] Group A2	Evolving	Labile	2	[FeFe]-centre, 3 x [4Fe4S] clusters, 1 x [2Fe2S] cluster	NADH-dependent glutamate synthase	3.68926	4.70125	2.05943	1.55	11.3047	2.29906	1.43897	0	1.83881	3.67647	1.36879	4.87794	18.5414	0	4.16967	7.53452	11.9907	1.84333	3.02417	3.14915	0	2.97219	7.16001	8.91307	2.74149	3.22421	2.09655	2.77361	2.64122	1.97001	3.76493	5.08256	1.59986	4.07985	2.11745	1.78498	0.867433	0.774432	1.72134	3.80287	7.07481
WP_014186754.1	MRLPEVIRVDKSKCQHCLACIQVCPVKLCNIVERDGISVQSDLCIGCGECIRVCHEKGHQARYGVDDFEALLGDLHSGVSIGVMVAPSAAVNYENALPQLITALRSMGAAYVFDVSFGAEITTYLYSKTLQKGEKGPIIAQPCPAVVSYIELYQPELIPFLAKTQSPALDAALWIKSQKEYSKLKLAFLGPCLAKRREIHDPNTRGLVSYNITYQSLDGYLQLKGYELKNMESGAFDTPEAERGVGYSQPGGLTETLLRFGIPLQRYEISKVEGPQEIYSSYLAGLHEDIQRQEGPVLVDILNCQWGCNLGPAVSNCKTHYQIERIMEMRKQGQLAKHSPLTQNGADIFREVYEWLEEQSLDFSRSYTDKSSFSHLHQPTLSEERRLWEMMHKPTEEER…	[FeFe] Group C	[FeFe] Group C2	Sensory	Labile	1	[FeFe]-centre, 2 x [4Fe4S] clusters, PAS domain	Fusion with histidine kinase	1.49864	3.19003	2.57429	2.325	0	1.37943	0.959312	3.28716	0.459702	2.75736	0	1.62598	2.06015	2.32935	1.04242	0	2.99768	0.460833	1.51208	0	1.36249	0.495365	0	1.78261	1.24613	1.07474	0.698849	0.924536	1.88659	0	1.88247	1.38615	0.799931	0.679975	4.2349	0	2.16858	3.87216	0	1.6298	3.21582
WP_008902548.1	MVNLTIDGKKVSVPGQTTIMEAAESVGIHIPRLCYLKDLNEIAACRVCVVEVDGKDKLITSCNNVVLEGMEVKTNSKKVRSHRKTTVELLLSQHSNKCVSCARNQNCSLQDLTYDLNIREIPYEEHLEKQEWNNNFPLIRDSTRCIKCMRCIQVCDKMQSLNVWGLEGTGARTTVNVTGGRKIEDANCSLCGQCITHCPVGALSERDDTEKAWNALEDETKTVVVQVAPAVRASWAEQMGLSEEEAPVGKIFDALKKMGADYVFDTVFGADLTIMEEASEFLERFTAGDLKERPMFTSCCPGWVRFVKTEFPHMLSSLSTAKSPQQMFGAVMKSYFAEKIGKNPNDIVAISVMPCVAKKAEREMDMYYGEFAGHETDIVITTRELTRMIKSAHINVSNL…	[FeFe] Group A2	[FeFe] Group A2	Evolving	Labile	2	[FeFe]-centre, 3 x [4Fe4S] clusters, 1 x [2Fe2S] cluster	NADH-dependent glutamate synthase	2.2081	3.00662	3.08915	3.09999	5.65234	3.67849	1.43897	2.19144	4.13731	0	2.73757	1.62598	2.74687	0	5.21209	12.3781	0	2.30416	0	0	0.454164	0.99073	0	3.56523	2.24303	0.537368	1.3977	3.69814	0.377317	0.985006	2.567	3.23436	0.799931	3.05989	1.05872	1.18998	0.867433	2.3233	2.15167	1.6298	0.643165
WP_005884626.1	MKHLSENIRVPIELDNPSIMRNESLCIKCGQCKEVCEKYIGVHNTYKLVDTNNIAVCINCGQCANVCPTSSITEKHEYQDIKKAILDSDKIVIFSTSPSVRVALGEEFGEEDGKFLEGKMISLLRKLGGDYILDTNFAADMTILEEASELIERVSKKTAPLPQFTSCCPSWVKYLETYLPDMRENLSSAKSPIGMQGPTIKTYFAKMKNIDPKKIVNVAVTPCTAKKFEIRREEMNAAGRYLDIPGMRDMDYVITTRELAKWAKEEGIDFSSLEDSKYDSLMGEASGAGVIFGNTGGVMEAALRTAYKYITGEDAPEVLLNFELVRGMKDVKTAIVKVKDLELKVAVIYGTKSAKDFIEKIKRENEEYHFIEVMTCPGGCIGGGGQPKGTLEKGDALRE…	[FeFe] Group A1	[FeFe] Group A1	Evolving	Labile	1	[FeFe]-centre, 2 x [4Fe4S] clusters	None	47.4415	67.5038	56.6344	53.4749	43.8057	38.6242	41.7301	26.2973	51.0269	56.0662	52.0138	52.0314	61.1179	53.575	42.7391	48.4362	35.9722	43.3183	65.0196	37.7898	52.2288	44.3352	52.9841	48.1306	49.8452	58.0358	51.7148	58.2457	50.1832	46.2953	58.1853	34.1918	38.3967	58.4778	55.0536	45.2194	35.9985	49.5637	27.1111	45.0911	43.7352
WP_010234442.1	MSDKHQFTDIRVPIEKDNPSIMRHEELCIKCKLCKKVCTEEISVYGHYDLEKTGDKAICIYCGQCANICPVYSITEVSNVKEVKDAINDPDKIVVFQTSPSVRVSLGEAFGMEPGTYVEDKMVAVLKSLGADYVFDTTFGADLTITEEASELVKRITSGKNPLPQFTSCCPAWVEFVEIYYPELINNLSSSKSPILMQGPTIKTYFAKQAGIDPKKIVNVALTPCTAKKYEITRAEKNDSGKYYNDETMRDMDYVITVRELANWIKESNIDFQAIQGSKYDSLLSRGSGGGIIFGITGGVMESAIRTAYYYVTGENPPKDLYNLEVVGDMDGIREAQVTMGNYTVNIAIVHGTANARKLIEKVKSGEKKYDFVEVMTCRGGCIGGGGQPKVKIPMADKV…	[FeFe] Group A1	[FeFe] Group A1	Evolving	Labile	1	[FeFe]-centre, 2 x [4Fe4S] clusters	None	0.960239	0.91952	0.514858	0	2.82617	0.459812	0	1.09572	0	5.51471	0	0	5.49374	0	0	0	5.99537	2.765	0	0	0	0.619207	0	1.78261	0.498452	1.07474	2.79539	0.924536	0.754635	0	0.5134	0	0.799931	0	1.05872	0	0	1.54886	0	0	0
WP_006009278.1	MPATKTDNMLSSLRLGVIERLALSFWAGTLPEDVDRIPLLMRPRGSEIMSRCCIYKDRAILRERLRAAMGFRLEDETDDSIPLRTYAEEALERKEPNWPILTVCDIACQGCMRARYYVTDACQGCVARSCIGSCRFGAISFSRGRSTIDPEKCRNCGMCMDACPYHAIVRLNVPCEAACPVRAIHKGNKGRAEIDFEKCTSCGRCMRACPFGAVMERSEVLPVLRALASGRHVTALMAPAIVGQFSGGPARIVTALRRLGFSDVMEVALGADVTSQREAAEFVERMERGDTFMTTSCCPAYVEAVRRHAPELLPHVSETATPMHYTAEIARERHPETVTVFIGPCVAKRQEGLHDEMVDYVLTFEEVGALFNARGIVVEECEEHELERPSNEARGYAIA…	[FeFe] Group B	[FeFe] Group B	Evolving	Labile	1	[FeFe]-centre, 3 x [4Fe4S] clusters, 1 x [2Fe2S] cluster	None	1.7689	0.655197	0	0	46.6318	0	0	0	0	0	0	0	0	0	0.521209	0.53818	0	0	0	0	0	26.3782	1.432	1.78261	0	0	0	0	0.377317	0.985006	0	0	0	0	0	0	0	1.54886	0	0	0
WP_005210847.1	MNSKHIDLFNTLIEAYYNGNFDETLNKIITCHEKSPQETFAIITSLCGVNIEFDNNYVYNLKKAITNYNVNKKIVEKLECSSANCQADKQSMYTCQKACPFNAIKFDAKNNTTFIDNDACIDCGLCVDSCKNGRILDKVEFIPIMDLIKNNKTVIAAVAPAIMGQFGDDVTMDQLRAAFIKIGFTDMIEVAFAADMLTVKEAVEFNKHVKSPNDLMITSCCCPMWVGMLKKVYKELLPNLSPSVSPMIAAGRVIKEINKDANVVFIGPCIAKKAEAKDKDIAGAIDFVLTFEEVNDIFKAFGFHPRDLEGIPTIEYTSKGGRLYARTGGVSLAVKEAVEELYPSNLKNFKAVQVEGVKQCKEILNLALKGEANASFIEGMGCIGGCVGGPKILVPPSQG…	[FeFe] Group B	[FeFe] Group B	Evolving	Labile	1	[FeFe]-centre, 2 x [4Fe4S] clusters	None	0.487062	0.528927	0.514858	0	0	0	0	3.28716	0	6.43383	2.05318	0	0	0	0	0	0	0	0	0	0.454164	0	0	0	0	0	0	0	0	0	0	0.924102	0	0.339987	0	0	0	2.3233	0	3.2596	1.28633
WP_013174729.1	MVSVVINGSKVDVPEDFTVMQAAAQAGFMIPSLCSHPDLKVKENCNVCVVEVNGELKNACAEKVSPGMEVKTFTPRVIEAKRENLKKILKVHPQDCLQCARNQNCELQALTATLTVRSFEHKPLQLTKDTSTPSIVRDPSKCTLCGRCVEVCNDIQTVGALEIKDGVVQTVDGKPLIETKCVMCGQCALACPVGAITEKEEIDRFLEAIADPEKIVVTQIAPAVRVAVAEEVGMETGSLDMLTFVAGLRQLGFDYVFHTNFTADLTIMEEGNELLKRLKEGGTLPMLTSCSPGWINFIETFYPEQLPHLSTCKSPQQMFGALVKTYWADKMGIDPAKIFSVSIMPCTAKKYEATRPEMRDSGYQDVDLVLTTREVGRLFRMCGVGFDKLQPSNFDSLMG…	[FeFe] Group A3	[FeFe] Group A3	Bifurcating	Labile	3	[FeFe]-centre, 3 x [4Fe4S] clusters, 1 x [2Fe2S] cluster	NADH dehydrogenase, thioredoxin	0.221084	0.0745508	0	1.55	0	0	0	0	0	0	0	0	0	0	1.04242	0	0	0	0	0	0	0.123841	0	0	0.498452	0	0	1.84907	0	0	0	0.462051	0	0	0	1.18998	0	0.774432	0	1.08653	0
WP_012301316.1	MERFMEQQREMTRRAFFKMMAGLGLAGWAVTAGGCLRPAELPAGVEDLPPYHHRVASAWPAQVRGCVPIDPVSPSLVQDHRKCNLCGQCLDVCRNTQSVVGYYDLPLVDEIICINCGQCALVCPTGAISERDDTEKVWQALEDPGRFVVVQTAPATRVSLGEEFGLPPGTWVAGKQVAALRRLGFDAVWDTNFTADLTIMEEATELIKRIKGELPGHPLPLLTSCSPGWVKFCEYFYPNLLPHMSSCKSPQQMFGALAKTYYAEKKNIDPEKIFSVSIMPCTAKKFEAQRPEMNASGLYRGTPSIRDVDAVLTTRELARMLKQKGIDLAGLPEEDYDPLMGKCTGGAIIFGATGGVMEAAVRTAFFFITGNEPPSDLLNLTPVRGLEGVKEGALDVPGV…	[FeFe] Group A3	[FeFe] Group A3	Bifurcating	Labile	3	[FeFe]-centre, 2 x [4Fe4S] clusters	NADH dehydrogenase, thioredoxin	0.1239	0.00670881	0	0.774999	0	0.919623	0	0	0	0	0	0	0	0	0	0	0	0	0	0	0	0	0	0	0	1.07474	0	0	0.377317	0	0	0	0	0.339987	0	0	0.433716	0	0	0	0
WP_006299828.1	MISLNIDGKYVKVPEGSTILDAAKALGIEIPTLCHLDLHAVGLVNKGASCRICVVEVKGRRNLAPACATPAVEGMEVKTNTIRVLNARKTVLELLLSDHPKDCLTCAKSGNCELQEMAERFCLRENRYEGGLQSTYKKDHSPSLERDMDKCVMCRRCETMCNEVQTVGVLSGVNRGFTSVVAPAFEKPLEESVCTFCGQCAAVCPTGALVERDYSWQVIEALADPEKVVVVQTAPAVRAALGEEFGLEPGTLVTGKMAAALRALGFDHVFDTDFAADLTIMEEASEFLDRLTRHLNGDKDVRLPILTSCCPAWVKFFEHQFPDMLDVPSTAKSPQQMFGAIAKSYFAQKLGIPREKMVVVSIMPCLAKKYECSRPEFAENGNPDVDISISTRELAHLIK…	[FeFe] Group A3	[FeFe] Group A3	Bifurcating	Labile	4	[FeFe]-centre, 3 x [4Fe4S] clusters, 1 x [2Fe2S] cluster	NADH dehydrogenase, thioredoxin, thioredoxin	0.356056	0.290025	0	0	0	0.459812	0	1.09572	0.459702	0.919119	0.684393	0	0	0	0	0	0	0	0	0	0.908327	1.4861	0	0	0	0	0	0.924536	0.377317	0	0.342266	1.8482	0	0	1.05872	0.594992	0	1.54886	0.86067	0.543267	0
WP_006442445.1	MENMENINLKINGLDVSAPAGSTILEAARLAGIKIPTLCFLKEINEIGACRMCIVEVKGARNLVAACVHPVNEGMEVFTNTPQLIASRRRTLQLLLSNHDQKCLSCVRSGNCELQQLCKEYGVDDADYYEGDMTHYDLDESAAHMVRDNNKCILCRRCVATCEKTQGIGVIGANNRGFDTMIGSAFEMGLGETSCVSCGQCIAVCPTGALYEKDYTQQILDAIADPDKYVVVQTAPSVRAGLGEEFGYPMGTDVEGKMAAALRRVGFDKVFDTDWAADLTIMEEATELLDRVKNGGVLPLITSCSPGWIKYCEHYFPDMTEHLSSCKSPQQMFGAMLKTYFAEKEGIDPKKIVSVSVMPCTAKKFEIGRDDQDAAGVPDVDIAITTRELARLIKRCGIE…	[FeFe] Group A3	[FeFe] Group A3	Bifurcating	Labile	4	[FeFe]-centre, 3 x [4Fe4S] clusters, 1 x [2Fe2S] cluster	NADH dehydrogenase, thioredoxin, thioredoxin	11.3178	14.89	18.5349	10.075	5.65234	29.4279	7.67449	3.28716	5.97612	22.0588	18.4786	4.87794	37.0828	2.32935	3.64846	1.61454	8.99305	8.29499	6.04833	1.57458	4.08747	7.05895	8.59201	0	8.97214	9.67263	1.3977	46.2268	10.1876	17.7301	3.0804	19.4061	0.799931	19.7193	6.35234	2.37997	12.1441	4.64659	2.58201	10.8653	4.50215
WP_015282154.1	MANRTIVPFGPQHPVLPEPIHLDLELEDETVMQALPSVGYVHRGLELLAENHDYFDMAHVAERICGICSFIHSQGYCQTVEQLMGVEVPPRAVYLRTMWGEISRVQSHLLWFGLVADSFGYESLFQHSWRIRERIVDIIEETAGGRVIYGTCKVGGVRRDVDDETLTRIGREVRSIKAEYDELAAIFLNDKTIKQRTVGIGVLDTEAAHALGAVGPTLRASGIAQDDRQLGYAAYGELDWEPAFETAGDCYARCAVRLREIDDSLDMITQCIERMPAGEIEVSTKGKRPDGEIMGRLEQPRGEVCYYMKANGKRKLERFRVRTPTFANVAPLVHMLKGCELADVPVITLSIDPCVSCTER	[NiFe] Group 4e	[NiFe] Group 4e	Evolving	Sensitive	6	[NiFe]-centre, 1 x [4Fe4S] clusters	NuoL, NuoH, NuoC, [FeS] protein	0.214551	0.0768686	0	0	0	0	1.43897	0	0	0	0	3.25196	0	0	0	0	0	0	0	0	0	0	0	0	0	0	0	0	0	0	0.171133	0	0.799931	0	0	0	0.867433	0	0	0.543267	0
WP_011641809.1	MVTIKVNGFETSVPEGSTVMQAAAAAGFMIPSLCSHPDLQVKDNCKVCVVDVNGEIKTACSEVVAPGMEVKTNTPRVIAEKRNNLKKILKVHPQDCLNCARNQNCELQTLAGTLIIRSFEHKPLKLPQDRSTPSIVRDPSKCTLCLRCVEMCNDVQTVGALEIKNGVPQTIDGKALIETKCVMCGQCALVCPVGAIIENEEVEEFLAAVADPEKIVITQIAPAVRVAVAEELGITTGALDMLNFVAGLRQLGFDYVFHTNFTADLTILEEGNELLKRLKEGGTLPMLTSCSPGWINFIETFYPDQLDHLSTCKSPQQMFGALAKTYWAEKMGIDPAKIYSVSIMPCTAKKFEAQRPEMNASGFRDVDLVLTTREVGKLFRMGGAYWDKLEPSNFDSLLG…	[FeFe] Group A1	[FeFe] Group A1	Evolving	Labile	1	[FeFe]-centre, 3 x [4Fe4S] clusters, 1 x [2Fe2S] cluster	None	0.653078	0.665748	0	1.55	1.41309	0.459812	0	0	0.459702	3.67647	0.684393	0	0	0	0.521209	0	0	0	0	1.57458	0	0	0	0	0.747678	0.537368	0	3.69814	0	0.985006	0.171133	3.23436	0	2.03992	0	0.594992	1.73487	0.774432	0.430335	0.543267	0
WP_027624751.1	MSYVIPIGPYHPALEEPVHVKLYTDGEFIEDAKVYIGYNNRGIEKLSQEKNFIQTITLVERVCGICSHSHSLAYCLAIENISGLEVPKRGSYIRVIICELERLHSHFLLLGLAAHIIGFDSAFMYTFSAREKVMGALETLTGNRVNYAMNIIGGARKDFSKEEIHDLLMLIEEMKEPYERILDIFGKDKTIALRTKGVGKLSYDEAWIHGLSGPHGRASGLECDTRKIDPYCCYDDFNFNMIVQKDGDVFSRVVVRLLEIGESIRIITQAAQNMPDTPINLGFKIPRVPAGEYCTRIEAPRGELTYYVVTDGGPGNRRVNIHVPTFRNAASVPAMLKGNTIADAGLIVASIDPCFSCLDR	[NiFe] Group 4d	[NiFe] Group 4g	Evolving	Sensitive	6	[NiFe]-centre, 1 x [4Fe4S] clusters	NuoL, NuoH, NuoC, [FeS] protein	0.29107	0.173019	0	0	0	1.83925	0.479656	0	0	0.919119	0	0	1.37344	0	1.04242	0	0	1.3825	0	0	0	0	2.864	0	0	0	0	0	0.377317	0	0	0	0	0	0	0	0	0.774432	0.430335	0	0
WP_033162999.1	MVNNVRIWIDGHSYHVPERTTILDAAKMAGIQIPTLCYWKGLNEIGACRVCVVEVEGYERLFTACNNTVDEGMVIWTNSKKVREARIVNVQLILSQHNANCTMCTRSGNCSLQKVANDLGIMDSPYKKDIPAQKGNPNFPLIRDYTKCIKCMRCIQVCDKIQNSHIWDVVNTGSRTTVDVRDVYSLEDSKCALCGQCITHCPVNALHERDDTDSVYEAIDDPKKVVIAQIAPSIRTAWGEEFGLSPDVATVERLAEALHMIGFDFILDTDFSADLTIMEEASEFLDHLQHPTDHKFPMFTSCCPGWVRFVKAHYPEFVDQLSTSKSPQQMFGAIAKSYYAKLLQVEPENIYSVSIMPCLAKKQECDIPVMNDACGDPDVDVVLTTREVNRMIRRAYIIP…	[FeFe] Group A2	[FeFe] Group A2	Evolving	Labile	2	[FeFe]-centre, 3 x [4Fe4S] clusters, 1 x [2Fe2S] cluster	NADH-dependent glutamate synthase	1.59371	1.87889	1.54457	3.87499	4.23926	2.75887	0.479656	2.19144	2.75821	0.919119	4.79075	0	2.06015	0	3.12725	1.61454	0	1.84333	1.51208	3.14915	0	2.22914	1.432	0	0.747678	0	1.3977	1.84907	0.754635	0	0.684533	5.54461	0	3.39987	2.11745	0.594992	0.867433	6.19546	0	0.543267	0
WP_021626398.1	MADTMRGVYTNLTKIRRDVFREVAKICYSIPSHPESGDEYFDDAFENLPYKILPGDVATYRESVFLERAIISERIRLALGLPLQGVDKPRRVSEGIKEATTNGLDYYKPPLINVIKFACNACKDNVYEVTNSCQGCLAHPCREICPKQAISFHNKRAVIDQDLCIKCGRCAQICPYHAIHHHVRPCADACGMHCIGSDEHGRAEIDYEKCVSCGQCLINCPFGAIADKSQIAQVIFSILQGEEVIAAVAPAFVGQFGGKGNVGKLREAFKLLGFSGVEEVALGADLCTVQEAEDYLSEVPDKLPFMGTSCCPAWASMAKKEFPEHKEAISMALTPMVLTARMIRSQHPNAKIVFVGPCAAKKGEALRKSVRSEVDFVLTFEEMAGMMEAKDIDYLRLHD…	[FeFe] Group B	[FeFe] Group B	Evolving	Labile	1	[FeFe]-centre, 2 x [4Fe4S] clusters	None	2.39583	2.92338	1.02972	2.325	1.41309	5.51774	2.39828	2.19144	2.75821	0.919119	0	1.62598	0	9.31739	2.08484	0	0	3.68666	3.02417	0	0.908327	0.99073	0	0	0.249226	2.68684	0.698849	5.54721	3.39586	1.97001	2.73813	3.69641	3.99965	2.7199	2.11745	1.18998	3.90345	5.42103	3.01234	0.543267	3.21582
WP_013298245.1	MFKFNTDIQMLKYEVLYNVAKLTLEDRLEDHYDEIPYEIIPGTKPRFRCCVYKERAIIEQRTKVAMGKNLKRTMKYAIEGEEPVIQVLDIACEECPIKRYRVTEACRGCITHRCTEVCPKGAISIIDRKSHIDYDKCIECGRCKEACPYNAISDNLRPCIRSCAAKAITMDEELKASINYEKCTSCGACTLACPFGAITDKSYIVDIIRAIKSGKKVYALIAPAIASQFKDVTVGQIKSALRKFGFADVIEVALGADFVAVEEAKEFEERIKDLKVMTSSCCPAFVVHIKKSYPELAHNISTTVSPMTAISKYIKKHDPMAMTVFIGPCTAKKSEVMREDIKGITDFAMTFEEMAAILDAAKIDIKEQQDVEVDDATLFGRKFARSGGVLEAVIEAIKE…	[FeFe] Group B	[FeFe] Group B	Evolving	Labile	1	[FeFe]-centre, 3 x [4Fe4S] clusters, 1 x [2Fe2S] cluster	None	0.167802	0.0817349	0	0.774999	0	0	0.959312	0	0	0	0.684393	0	0.686718	0	0	0	0	0.921666	0	0	0	0	0	0	0.249226	1.61211	0	0	0	0	0	0	0	0	0	0	0	0	0	0.543267	0
WP_007157603.1	MVTNDKGFIPLKHRVIEGLARIAWNGEVTEEAKEGLIRELSPGPKAAFRCCVYKEREILRWRIRLACNEDASPKRKSSNVIQVIDPACEECPISSYSVTDNCRLCLGKACQNSCHFGAITMTDQRAHIDPMKCKECGMCATACPYSAIAQLTRPCKKPCPVNAITYDENGLCVIDDNRCIRCGQCVHSCPFGAISTKTHLLQVISAIKEGKEVYAMCAPATEGQFGKDISMSAIRVALKKLGFTDMVEVGLGGDMTAAYEALEWSEARKEGKKMTTSCCPAFINLLKIHFPDQYHENMSETLSPMAAVSRYLKAIHPDCVTVFIGPCMAKKSESQEMGIEGNADYVLSFGEFSSLLRSKDVQLEAEVSPYQEASLWGKNFASSGGVANAVMECMRERGE…	[FeFe] Group B	[FeFe] Group B	Evolving	Labile	1	[FeFe]-centre, 3 x [4Fe4S] clusters, 1 x [2Fe2S] cluster	None	3.03911	4.49475	2.57429	1.55	1.41309	1.37943	0	3.28716	3.21791	2.75736	4.10636	0	0.686718	0	1.56363	4.30544	11.9907	2.30416	1.51208	3.14915	4.54164	3.09603	0	3.56523	0.996904	2.68684	2.09655	0.924536	2.2639	4.92503	2.22473	5.54461	3.19972	6.11977	3.17617	4.16495	3.90345	1.54886	1.72134	1.08653	2.57266
WP_012032547.1	MEKREFSPGPVVRSTGQLYDNPEKKVEKIRLIIDGREVEAEKGMSVLEAARLAGIEIPSLCYLRRINEIGSCRVCLVEIEMKGTRTLQASCVYPASGGLVVYTNTPRARRVRKTMVELLLSDHHRECTTCIRNLNCELQNLTDNLGIRNIRYTGEMKMLPVQNKNPFIVRDYNKCIKCRRCEAICSKVQEVNVYSALNRGYDTVIAPAFMQDLSRVACITCGQCVIACPTASLTEKECIDSVWEALEDPNKYVVVQTAPSIQVTLGEVFGYPVGTVVTGKVVAALRRLGFDKVFATDFTADLTIMEEAYELLERLEGRGRLPLLSSCSPGWVKFAEHFYPEFLENLSTCKSPHEMFGALTKTYFAEKEGLDPEKIVVVAVMPCTAKKFEASRPEMGTGK…	[FeFe] Group A3	[FeFe] Group A3	Bifurcating	Labile	3	[FeFe]-centre, 3 x [4Fe4S] clusters, 1 x [2Fe2S] cluster	NADH dehydrogenase, thioredoxin	0.156193	0.0171061	0	0	0	0	0	0	0	0	0	0	0	0	0.521209	0	0	0	0	0	0	0.123841	1.432	0	0.249226	0	0	0	0	0	0	0	0	0	0	1.18998	0	0	0.430335	0.543267	0
WP_014256388.1	MKTLSIQNRIKVTVNGREIEVYDNLTILQALIQEDIHIPHLCYDIRLERSNGNCGLCVVTIIEPNGEREVKACQTPIKEGMVICTNSPKLENYRKVRLEQLLSDHNADCVAPCVMTCPANVDIQTYLRHVGNGNFEAAVRTIKERNPFPVVCGRVCPHPCEAACRRNLVDSPVAINYVKRFAADWDMSQPTQWLPKKNPPTGKKIAIVGAGPSGLSAAYYSAIKGHDVTVFERQPKAGGMMRYGIPEYRLPKATLDKEIDLIRSLGVKIMTEKALGTHIRLEDLSKDFDAVYLAIGSWTPTPLHIEGENLDGVWLGIRFLEQVTKNAEINLGDTVVVIGGGNTAIDCARTALRKGAKSVKLVYRRTRDEMPAEPYEVEEALHEGVEMLFLMAPTKITSV…	[FeFe] Group A1	[FeFe] Group A1	Evolving	Labile	1	[FeFe]-centre, 3 x [4Fe4S] clusters, 1 x [2Fe2S] cluster	None	3.81828	6.69022	4.11887	3.09999	4.23926	3.21868	3.35759	4.38288	3.67761	5.51471	0.684393	1.62598	3.43359	4.6587	2.60604	1.61454	5.99537	2.765	9.0725	3.14915	1.81665	2.97219	2.864	5.34784	1.24613	1.61211	2.79539	12.019	7.16903	2.95502	1.5402	4.62051	4.79958	2.7199	6.35234	1.18998	1.30115	1.54886	2.58201	2.17307	4.50215
WP_013608542.1	MIHPIYTELTECRDCYKCVRGCPVKAIQVKDGSAVVVKDRCIYCGHCVDICPSHAKKIRNDLARVRQFLISGRKIYCSLAPSAASEFPEGVDALVLALERLGFTAVSETALGAALVNESIEEYAKEHDGTCSWISTACPTVVQNIKKYHPSLVPALSKVPSPLQCHSAYLRKLYGQDIGVVFVGPCIAKKVEADETPGYPDFALTFEELRTWLKLESLDLSLLAEQIEADPSLVPPFVPCKAGKSTLYPIEGGMIASLSWGSDPFQTKAVAISGSTQVVGTLEGMEKGQRNSDFLELLFCEGGCINGPGCEKGRSSAAKKGCSSRYTRSRITDDAPVFAGDRAFVSTLLEQGYALIEKPGSVAMNPPVSSFVSVHSEAQIERALKSLGKRDKAEELNCG…	[FeFe] Group C	[FeFe] Group C3	Sensory	Labile	3	[FeFe]-centre, 2 x [4Fe4S] clusters, PAS domain	Phosphatase, thioredoxin	0.142188	0	0	0	0	0.459812	0	0	1.3791	0	0.684393	0	0	0	0	0	0	0	0	0	0	0.123841	1.432	0	0	0	0	0	0.377317	0	0	0	0	0	1.05872	0	0	0	0	0.543267	0
WP_027431522.1	MGKRSVIPFGPQHPVLPEPIHLDLVVEDERVIEAIPSIGFIHRGLEGLVKKKDYNTMTYIVERTCGICSFQHGMGYCETIEHIMDVEVPDRAKLLRTIWAELNRMHSHLLWLGLLADAFGFENLFYQCWRIREKVLDLHELTAGARLIFSVNTIGGVKRDIDEDKQRTILETLSEVEKELKVIEKTFFYDYTVESRLKGVGILSKEKVHELGCVGPFARASGLAVDLRKLEYAGYSKIDFEPITSNDCDSYARCYVRLKELYQSIDIIRQAIAKLPADKTLSTPVKGNPNGEFIMRVEQPRGEAFYYAKANGTPYLDRIRVRTPTFANIAGLCEMLKNTELADVGLLVLTIDPCISCTER	[NiFe] Group 4e	[NiFe] Group 4e	Evolving	Sensitive	6	[NiFe]-centre, 1 x [4Fe4S] clusters	NuoL, NuoH, NuoC, [FeS] protein	0.149829	0.0421983	0.514858	0	0	0.919623	0	0	0	0	0	0	0	0	0	0	0	1.3825	0	0	0	0.123841	0	0	0	0.537368	0.698849	0	1.13195	0	0.171133	0	0	0	0	0	0	0	0	0	1.28633
WP_002580338.1	MGKYMIIDGNRVEFDEEKNILDLVRKAGIDLPTFCYYSELSIYGACRMCAVEDEKGRIIFSCSSPPKDKMVIKTNTPKLYVHRKMILELILASHCRDCTVCRKSGKCRLQELALRFGVDKIRFKNTKKKLPIDNSSNAIVIDSSKCILCGDCVRMCSEVQNVGAIDFAFRGSNMMVSPAFGKNLSETNCVSCGQCSAVCPTGAITIKSCVKDVWKAIYEKDKRVVMQIAPAVRVALGEEFKIKSGENVMDKIVAVMRRLGVDEIYDTSVGADLTTLEESKEFLEKLKCESGCISINNDLKHKDLDVVDCHNKNIKKEFFENRRNIRYPLFTSCCPAWYRYAETKHPELMPHISSCKSPMEMFGVVIKEYFKERDLKEGRETISVAVMPCTAKKAEADRE…	[FeFe] Group A3	[FeFe] Group A3	Bifurcating	Labile	3	[FeFe]-centre, 3 x [4Fe4S] clusters, 1 x [2Fe2S] cluster	NADH dehydrogenase, thioredoxin	1.0751	9.86413	1.54457	1.55	4.23926	1.37943	0.959312	0	2.29851	1.83824	0	1.62598	1.37344	0	3.64846	0	0	0.460833	0	0	1.36249	3.71524	2.864	0	2.24303	0	0.698849	0	0.377317	0.492503	1.0268	0	0	0	3.17617	0	0.433716	0.774432	0	3.80287	0
WP_002853139.1	MEMIHLKINGIPVEVPAGSTVLEAAKAANVDIPTLCYLKDVNCIGACRICVVEITGARGLVAACTHPAAEGMEVFTNTPKVRKSRKTTLELLLSNHKKKCLSCVRANNCELQKLSVAYGADEDRFMPEEMNKPIDDSSPFLVRDNNKCIQCMRCVAACKNVQSVSVIGNIRRGFNVHVGSAFDAPLASTACVGCGQCIVSCPVGALTEKSSEKKVWDAIADPEKKVIFFTAPSIRATLGEEFGNPVGTNVEGKMVAAIRRLGPDQVFNMDVTADLTIVEEANELIERITTGGTLPMFTSCCPGWVKFCEHFYPDFLPHLSSCKSPQQMFGAVLKSYYAQKNNIDPKNLFVVSVIPCTAKKFEVTREEQREGDFDDVDVALTTRELGRMIREAGIDFNSL…	[FeFe] Group A3	[FeFe] Group A3	Bifurcating	Labile	3	[FeFe]-centre, 3 x [4Fe4S] clusters, 1 x [2Fe2S] cluster	NADH dehydrogenase, thioredoxin	2.81432	10.3636	1.54457	1.55	1.41309	2.75887	4.3169	0	2.75821	4.59559	5.47514	0	15.7945	0	1.04242	0	2.99768	0.921666	0	4.72373	1.36249	4.58213	11.456	0	4.23684	0	1.3977	4.62268	2.64122	2.95502	1.71133	2.31025	0.799931	0.339987	3.17617	0	2.6023	3.87216	15.0617	9.23553	0
WP_013387146.1	METVKIKINGIEVESPKHATILAAAKSIGVRIPTLCQLKMGDIGYVHDPASCRMCVVEVNEQENLYPACETKVYEGMEIITNSAELIQIRKNILELILSNHPKDCLTCSKSGECELQDLADEFKIKNIRFEGEKSVYRSDSSPAIIRDMDKCIMCRRCETMCNKIQTCNILSAVNRGFETVVAPSHEKDLEDTACTFCGQCVAVCPVGALHEKDYTWEVVDMLANPSKTVIVQVAPAVRVALGEEFGHKPGTDVTGKMVTALRRIGFDYVFDTNFAADLTIMEEAAELKSRVVRYLDGDKDVKLPILTSCCPAWVKFIEHNFPDMLDIPSTAKSPQQMFSAIAKEFWAKEMGIKREDLIVVSVMPCLAKKYEASREEFSKDGNPDTDISISTRELASLI…	[FeFe] Group A3	[FeFe] Group A3	Bifurcating	Labile	3	[FeFe]-centre, 3 x [4Fe4S] clusters, 1 x [2Fe2S] cluster	NADH dehydrogenase, thioredoxin	0.145265	0.341808	0	0	0	0.459812	0	0	0	0	0	0	0	0	0	0	0	0.460833	0	0	0.454164	0.123841	0	0	0	0	0	0.924536	0	0	0.5134	0.462051	0	0	0	0	0.433716	0	0	0	0
WP_007062593.1	MSLITLTINNKQVQVEKGATILQAAKLLEIEIPTLCHLKLHDGFENKPGSCRVCVVEVEGRRNLAPACTTPVTEGMVVKTNSIKAIKARRNVVELILSDHPQNCLLCEKSTNCELQALAADMGIHEIKYKGEMSTYAKDTSSPSIVRDLDKCILCRRCETVCSEIQTVSALSAVSRGFDTIVSPAFGTAMVETNCTFCGQCVAVCPTGALAEVNNTTKVWDALNTEGKLVIVQTAPAVRAALGEEFGLEYGKPVTGKMVAALRSLGFDKVFDTDFAADLTIMEEATELMGRITNGGKLPMLTSCCPGWINFIEHEFSDLLDSPSSCKSPQQMFGAVAKTYFAEKMNMDPKDIILVSVMPCLAKKYEAARPEMNSDVDIVISTRELAKMIKEAGINFEKL…	[FeFe] Group A3	[FeFe] Group A3	Bifurcating	Labile	3	[FeFe]-centre, 3 x [4Fe4S] clusters, 1 x [2Fe2S] cluster	NADH dehydrogenase, thioredoxin	0.40614	0.432521	0.514858	0.774999	0	1.83925	0.479656	0	1.3791	0	0	0	0	0	0	0	0	0.460833	0	0	0	0.743048	0	0	0.747678	0.537368	0.698849	0	1.50927	0.492503	0	0	0	0	0	0.594992	0	0.774432	0.430335	1.6298	0
WP_005643376.1	MMNLKVSRPFNLIFNLQLSRVMSERIVVDPLTRIEGHLRIEADIENGKIKDAYSSGTMVRGIETIVKDRDPRDAWVFVGRVCGVCTSIHSLCSVRAVENAFDIVIPPNAQMVRNIMTSVLYMHDHVVHFYQLHALDWVDVVSALKADPTEASLLAQKLSPWPKSSTGYFTALKERLNKFVGSGQLGIFANGYWGHPAYKLTPEQNLIAVAHYLEALEWQKEIVKVHAVFGGKNPHPNYLVGGMPCSIDLNEANAINTERLALVKQKLQEAKTFIDQVYIPDLLMIANAYKDEWSKLGGGVKNYLAYGDFPIYEYGETENYKMPRGIVLDRDLSKVYPVDANSPEEIKEYIYHSWYNYTQGDKIGLHPYDGETHLNYTGPRPPYTHLNVEDKYSWIKTPR…	[NiFe] Group 1d	[NiFe] Group 1d	Aerobic Uptake	Tolerant	3	[NiFe]-centre, 1 x [4Fe3S] cluster, 1 x [3Fe4S] cluster, 1 x [4Fe4S] cluster	Cytochrome b	1.64207	4.09082	1.02972	2.325	0	0.459812	0.959312	1.09572	0	0	0	9.75588	0	2.32935	0	0	2.99768	3.22583	0	0	0.454164	1.11457	0	0	6.7291	0.537368	11.1816	0	0.377317	0	5.6474	0	0	0	0	0	0	0	0	1.6298	0
WP_010663850.1	MVEKVNLKIDHLSVSVDAGATILEAARKVNVRIPTLCHHEDLCVAGNCRVCVVEQVGVDRLQPSCAIPVSEGMEILTNSMKVRNARKQIIELLISEHRAECTTCYKNGKCELQTLSNEYIVGESGFLPLVPLKGYTIDEFSPSIIKDDSKCIRCQRCVRTCDQIQSIGALTVAHKGGEMKISTFFDKPIYEVVCTNCGQCVNRCPTGALTEKTYINEVWNAIDNSDKYVVVQTAPAVRIALGEALDMDPGEIVTGKMVAALRRLGFNAVLDTDWSADLTIIEEGNELLQRLKRVLKDKESDVKIPMTTSCSPGWIKFIEHTFPDFLEHLSTAKSPQQMFGALAKTFYANKIGVDPSDMVSVSVMPCTAKKFEANRPEMRASGYQDVDFVVTTRELAMMV…	[FeFe] Group A3	[FeFe] Group A3	Bifurcating	Labile	3	[FeFe]-centre, 3 x [4Fe4S] clusters, 1 x [2Fe2S] cluster	NADH dehydrogenase, thioredoxin	0.193283	0.0419016	0.514858	0	0	0	0	1.09572	0	1.83824	0	0	0	0	0.521209	0	0	0	0	0	0	0.123841	1.432	0	0.249226	0.537368	0	0	0.377317	0	0	0	0	0	0	0	0	0.774432	0	1.08653	0.643165
WP_020003846.1	MVKIKINGKQIEVEEGLTILKAAKKLGIKIPSLCYHPDIPPTSACGICVVKLANQGNKYVRSCSMIVEEGMDIITHDAEINTVRKGVLELVLSAHPNDCLNCIRNGECELQTAAADFGVRNSKYDNIKQNHPRDESAGSIVLNPEKCIKCGRCVVVCQEMQKVHALGFVNRGFDTYFAPSAVSLKDSPCVDCGQCAAHCPVAAIYEKDQTKEVEAAIDDPNTYVTVQMAPAVRVALGEYFGLKAGENITGKIYAAMRLMGFNAIFDTNFGADLTIIEEAHEFVKRFTESNGTSAMTTSCCPAWVKYAEEYYPDLLDNVSSAKSPHMMLAPMTKTYYSEKANVDPFTIFNVSIMPCTAKKNEIRKNETMYSSGYKDVDVVLTTREFARMIKHYGIDVAGI…	[FeFe] Group A3	[FeFe] Group A3	Bifurcating	Labile	3	[FeFe]-centre, 3 x [4Fe4S] clusters, 1 x [2Fe2S] cluster	NADH dehydrogenase, thioredoxin	0.127597	0.0121143	0	2.325	0	0	0	0	0	0	0	0	0	0	0	0	0	0	0	0	0	0.495365	0	0	0.498452	0.537368	0.698849	0	0	0	0.855666	0	0	0	0	0	0	0	0	0	0
WP_006599253.1	MGNDGGIIALKHEVLYQVAKLAFEGKLESDRDTLPEKIIPGMIPHYRCCVYKEREIVRQRIRMAEGKAPGLEDDGNIIQVIEPACADCPISSYVVTDNCQNCLGKACLSACRFGAIHPGEKRSRIDANKCRECGMCATACPYNAIAHLVRPCKNSCPVDALTYDEMGLSVIDEEKCIRCGNCIHSCPFGAISTKSWIVDVIKAIQSDREVYVMIAPAVEGQFGKGITMTSWRKAMKELGFTDFVEVGLGGDLTTAAEAPEWYEAYQKGEKRTTSCCPGFVNMILRQYPELKDNMSTALSPMGELSRLIKSMHPDALTVFVGPCVAKKSEIIDQKIPGNADFALTFSELHALMRAKDIELTPMEEDYQRASTYGKRYADVGVADSCVQYIHEMGHDEELS…	[FeFe] Group B	[FeFe] Group B	Evolving	Labile	1	[FeFe]-centre, 3 x [4Fe4S] clusters, 1 x [2Fe2S] cluster	None	4.57224	5.76537	5.14858	2.325	0	1.37943	2.87794	2.19144	5.97612	2.75736	2.73757	9.75588	0	4.6587	3.12725	0	5.99537	2.765	12.0967	12.5966	11.8083	2.47683	0	0	3.73839	4.29895	2.79539	12.019	2.64122	7.38755	2.39586	7.85486	0	18.0193	8.46979	4.16495	3.90345	3.09773	5.59435	6.5192	4.50215
WP_014186009.1	MLDGIVYTDMEQCQACSACLRVCRTKSIMMKEGKSKIIEESCLNCGACLKACSRGAKKYQSGLEAVEELLAKDKSAIILAPSYVIVAQKRYGCSPEQFGTALRKLGFALVYEASFGADVVTKVYLNYLWDFLNTQGREKTHVITSPCPSLMNFMEKHAPSLLDEFAPIMSPMAAQAVLVKQWNQGQVRIVGASPCMAKKSELLDPELGLYDQKLTFEELIQLLDRRGIVPACLEETEFDGIQALYGAGFPISGGLTKALEPFSGELGFNLLSNDYLIIEGEDRSTNFLKQMARHKQGSGGLAGYPLLIDILFCEGCIMGKSLGVEGDYWENKRLITDYTKKRFQKLQENSQECQGYITLVKNTVEVPEFQRWLAIVEELIADNQFTRPWQSREYHRKEP…	[FeFe] Group C	[FeFe] Group C3	Sensory	Labile	1	[FeFe]-centre, 2 x [4Fe4S] clusters, PAS domain	Histidine kinase	0.66619	0.776951	0	0	0	1.37943	0.959312	1.09572	0.459702	0.919119	1.36879	0	2.06015	4.6587	1.56363	0	2.99768	0.921666	0	0	0	0.247683	7.16001	0	0.249226	0	0	0	0.754635	0	0.171133	0	0	0	0	0.594992	0	0	0.430335	0.543267	0.643165
WP_025279286.1	MTKRIVVDPITRIEGHLRIEADIDDGIITDAFSSGTMIRGIEIIVKDRDPRDVWAYVGRVCGVCTSIHSLCSVRAVENALGIVVPPNAEQVRNLMQSAVTIQDHVTHFYQLQALDWVDVLSALKADPRKAAEVAQSLSDWPKNSIGYFVEIQEKVQNFIETSRFSIFSNGYWGHPAYKLPPEVNLVALAHYLEALDVQKEMVKIQTIFGGKNPHPNFLVGGMACAININDPNALNMERLNYVAQIIERTQTFVQQVYLPDVVAILSYYPEWTRIGGGLRNYIAYGDYPMGHYGELSTYKSPRGIVVDRDLSQVIEFDPWAMDGLLEFVNNSWYSYTQGKEVGLHPSVGETRLDYTGATPPYEYLDRDQPYSWIKTPRYKGMPMETGPLARNIVAHACGD…	[NiFe] Group 1d	[NiFe] Group 1d	Aerobic Uptake	Tolerant	3	[NiFe]-centre, 1 x [4Fe3S] cluster, 1 x [3Fe4S] cluster, 1 x [4Fe4S] cluster	Cytochrome b	0.359016	0.149044	0	0	0	1.37943	0	0	0	9.19119	0	0	0	0	0	0	0	0	0	0	0	0	5.72801	0	0.249226	0	0	0	0	0	0.171133	0	0	0	0	0	0	0	0	0	0
WP_028308072.1	MKQYFHSVRLDKEQCKGCTNCIKRCPTEAIRVRDGKARIIEELCVDCGECIRTCPNHAKIAVEDSLDKLNDFKYRIALPAPSFYGQFDSKHTLDEILEALIMIGFDDVFEVALAAEVVTRGINNYLQENQSLKPLISQACPAVVGLIQVRFPLLLEHIIPIDSPMNMAAMYAKRNAFSKGYAPQEVGTFFITPCPGKITAIRQPAAKNHVYVDGAISISTIYGQVLKHIKDLKGNRKLQKASGLGIGWGSSGGEIKALKHGTKLAVDGIQNVINVLEQVEKGELRDIAYLECQACQGGCIGGSLVAKNPFLARVRIDQLVSKGTNPQLEHFLETVDLSHCLLKGDFQPRKVRNLDDNLAEALVKMEKLERTLEELPGLDCSSCGCPNCRALAEDIVKGL…	[FeFe] Group C	[FeFe] Group C1	Sensory	Labile	2	[FeFe]-centre, 2 x [4Fe4S] clusters, PAS domain	Histidine kinase	0.193749	0.0796044	0	0	0	0.459812	0	0	0	0.919119	0.684393	0	0	0	0	0	0	0	0	0	0	0.371524	0	0	0.249226	0	0	0	0.377317	0	0	0	0	0	0	0.594992	0.433716	0	0	1.6298	0
WP_005952705.1	MFWNFFSFDVTLKFGAGAFVCGEETALIQSMQGERGEPKSKPPYPAQSGYLGKPTVVNNVETLLNVPLIIRYGSDWFREIGTESSPGTKVFALAGKVNNVGLVEVPMGTTLREIIFDIGGGIKNGKRFKAVQTGGPSGGCLTNKDLDISIDFDSLSAKGSIMGSGGMIIMDEDDCMVSIAKFFLEFTLDESCGKCTPCRIGNTRLYEILSRITEGEGRMEDLKLLEELSDTIKEASLCGLGQTSPNPVLSTLKEFREEYIQHIEDKTCLAGVCQKLTHYRITDKCVGCTLCARNCPVHAIVGTVKNNILFHKRFALNAEFVTTDVSLEQLQGHKGGRKDMVRLEIDGKRVEIREGKTILEAAKEIGIEIPHLCYMHLEEVGFKNDCSSCRICVVEVEGQ…	[FeFe] Group A3	[FeFe] Group A3	Bifurcating	Labile	3	[FeFe]-centre, 3 x [4Fe4S] clusters, 1 x [2Fe2S] cluster	NADH dehydrogenase, thioredoxin	105.016	147.392	80.3179	144.15	138.482	110.355	96.4108	79.9876	109.869	187.5	67.7549	165.85	132.537	81.5272	90.1692	20.989	107.917	80.1849	49.8987	55.1102	64.9454	146.504	136.04	65.9567	134.084	113.385	63.5952	169.19	78.1047	89.1431	129.034	94.2584	34.397	67.6575	57.1711	46.4094	77.6352	106.097	56.3739	129.841	54.669
WP_026649803.1	MQRFQSILQFKKVSCKNCYKCVRNCPVKAIRVHDHQARIIESQCIYCEKCIFVCPQDAKEEQNMIPAICNAMENKTQVIASLHPAYLARFGVTGINGIREAMKKLGFADAADAAEGASLMISQYRALFAEQKEPGIMISSACPVIVQLVKKHYPHLLGNLVQSASMMQFHASYLKKKYPKAEIVYVSPCISAISELRDSGNEVDYVITLEELAQWMKKEGISITEKEPEQIAYRSREIAIADGLTDLLGAVKGIRRLSVSGMEQCREVLEELHPEDFENCFLEMYACSGGCVAGPSFQMKKGHYLADVLAVKNAAFGKDFHREQGDYELPGFELRKNFGYCSAQEQEEVSEEEIRDALAEMGKFSPKDELNCGACGYNTCREKAIAIIQNKAEVAMCIP…	[FeFe] Group C	[FeFe] Group C3	Sensory	Labile	3	[FeFe]-centre, 2 x [4Fe4S] clusters, PAS domain	Phosphatase, thioredoxin	221.771	313.33	176.081	189.1	84.7851	86.9044	382.286	178.603	228.931	226.103	180.68	131.704	70.7319	323.779	41.6967	104.407	125.903	233.642	435.48	113.369	158.503	72.9425	68.7361	171.131	82.4938	90.8153	90.1515	551.948	230.541	428.97	111.237	328.056	258.378	502.841	184.218	187.423	731.246	75.1199	392.465	24.9903	413.555
WP_009536327.1	MVNCIIDGKKVCVPEHTTILDAAKEVGITIPTLCYFKNLNEIGACRVCVVEVEGDARLHAACNSPVLEGMVIRTNSKKAREARKYNVELILSQHNVTCTTCVRSGNCSLQSVANDLNIVGKDYFPKDLPKQKGSKTFPLIREYDKCIKCMRCIQVCDKIQATHVWDVINSGGKSTVDVRDFYRLEDSSCALCGQCITHCPVGALRERDDTDKILDALDDPETIVLAQIAPSIRTAWGEEFGLSPEEATVERLSACLKEMGFDYVFDTDFSADLTIMEEASEFLHKLTHNEGQFPMFTSCCPGWVRFIKSHYPEFIPQVSTSKSPQQMFGAIAKSYYADILKVDPKKIFSVSIMPCLAKKAECAYPNMVDKDGNFDVDVALTTREVNRLIRALHISPAKL…	[FeFe] Group A2	[FeFe] Group A2	Evolving	Labile	2	[FeFe]-centre, 3 x [4Fe4S] clusters, 1 x [2Fe2S] cluster	NADH-dependent glutamate synthase	0.867905	1.25934	0.514858	0	1.41309	0.919623	0	0	0	0.919119	0.684393	0	5.49374	2.32935	1.56363	0	0	0.921666	0	0	0.454164	0.866889	7.16001	0	0	1.61211	1.3977	1.84907	0.377317	0	1.19793	0.924102	0	1.01996	1.05872	0.594992	0.433716	3.09773	0	1.08653	0
WP_027364040.1	MQKYFHSVMLDQEKCKGCTNCIKHCPTEAIRVREGRARIIEERCIDCGECIRICPNRAKLAITDPLERLQEFKYTIALPAPSLYAQFGPAVMPHNILAALLDIGFDDYYEVAVGAEIVTNCLCNYLKRDKPRPLISSACPAVVRLMQVRFPGLLEHVVLIDTPMEISARIAREKATRVHGYSSEEIGVFFITPCPAKVTAIKQPFGSRSYVDGAISMSSIYGEILGRLESPSTNIAPGGSPAIGVGWGRAGGENHGIKDHSLLAVDGIHNVINVFEEIERGGLRDIDYIEAQACTGGCIGGPLVPQNQFVSRVRMENLVKKLSQNNYRCPEIDCNYDFCELPGPILPRPALKLSNDIDQAISMLEQVEKITSELPGLDCGSCGSPNCRALAEDIVRGYA…	[FeFe] Group C	[FeFe] Group C1	Sensory	Labile	2	[FeFe]-centre, 2 x [4Fe4S] clusters, PAS domain	Histidine kinase	0.225345	0.134344	0.514858	0	0	0.919623	0	1.09572	0	0.919119	0.684393	0	0	0	0	0	0	0	0	0	0	0	0	0	1.24613	0	0	0	0	1.47751	0	0	0	0	0	0	0	0	0	1.6298	0
WP_004627876.1	MQTFKDLYNRLVKAAVQNRVEEEVEEIRKQDFDPHQLDCLLHPKDYGPVWRLGDCDCCDDDGKNCPTKCLFDALEKDEKGNVSINVEKCVGCSGCVDRCKAEKLVGSRDILPTLDAVNNAQGPVYAMIAPAFTSQFSEEVTPGKLRSAFKRLGFAGMLEVALFADILTLKEALEFDRNILDEKDFLLTSCCCPMWIAMIRRVYSQYVPHVPGSVSPMIACGRSIKLLEPNAVTVFIGPCIAKKAEAREKDIADAVDFVLTFQEVQDIFEAAGIDPARLQEDSRDHSSKAGRIYARTGGVSEAVQTTVERLNPHRKISVKARQADGMPACKELLGALKEGRITENFLEGMGCVGGCVGGPKAILNREDGRKNVIAYGSQALYSTPIDNPYVIDLLHRLGF…	[FeFe] Group B	[FeFe] Group B	Evolving	Labile	1	[FeFe]-centre, 2 x [4Fe4S] clusters	None	0.438198	0.433588	0	2.325	0	2.75887	0	0	0	0	0	0	0	0	0	0	0	0	1.51208	0	0	0	0	1.78261	0	0	1.3977	0.924536	0	0	0	0	0	0	1.05872	0	0	0	0	1.08653	0
WP_027095964.1	MTSFQELYERLVKASFEEKGLDEHPSTRKDPWEQHQVDCLMHPERHAPVIRIGDCVCTEQEKKICAGQCQFMALFQDSKGDISIDPERCAGCGDCIEQCRAKKLTESKDILPVLHAVYRADAPVYAMIAPAFVNQFTSGVGSSRLRSAFKHLGFTEMVEVALFADILTLKEALEFDKNIIHEEDFQLTSCCCPLWIAMIRKVYHVLIPHVPGSVSPMVACGRAIKALHPKAITVFIGPCIAKKAEAREKDIADAVDFVLTFQEAQDMFRFARIDPAALPEDEWDHSSRSGRIYAATGGVSEAVQQTVERLNPNRTITVHTEQADGVPACKAMLSDILNGKITKNFYEGMGCVGGCVGGPKVLIPMEEGRENVYSYGAEAIYPTPIDNPFVIELLHQLGF…	[FeFe] Group B	[FeFe] Group B	Evolving	Labile	1	[FeFe]-centre, 2 x [4Fe4S] clusters	None	0.784315	0.233473	0.514858	0.774999	0	2.29906	0	0	0	0	0	0	0	0	0.521209	0	0	0.460833	0	0	0	0.123841	1.432	0	0	0	0	0.924536	0	0	0.342266	0	0	0	0	0	0	0	0	0.543267	0
WP_004610270.1	MRGIYSSLTKIRRKVFVEVAKLAYEGNDYSRIEDLPYKIIPGEVATYRDSIFLERAIVGERLRLTMGLSLRPIDEPAPISKGIEESIIADKYYEPPLINIIKFACNKCEENKYEVSNGCQACLAHPCIEICPKNAISFKNGKAYIDQDKCIKCGLCKNNCPYDAILKKERPCAKACGMNAIESDEYGNAHINYDKCVSCGMCLVSCPFGAIADKSQIFQLIQAIKNGDEIIAAVAPAFIGQFGPKVTPEVLKKAMRELGFKDVVEVAIGADLCTIDEANDFLEKVPEKQPFMATSCCPSWSMMAKKEFPEFKSYISMALTPMVLTARLIKEKHPNSRVVFIGPCAAKKLEASRKSVRSEVDFVLTFEEVGAMFEAKGIDLSTLEADPNDSFTQASGDGR…	[FeFe] Group B	[FeFe] Group B	Evolving	Labile	1	[FeFe]-centre, 2 x [4Fe4S] clusters	None	14.0921	35.7434	9.26745	10.85	18.3701	16.0934	21.5845	12.0529	15.1702	20.2206	9.5815	13.0078	27.4687	4.6587	11.9878	3.22908	23.9815	18.8941	4.53625	4.72373	7.26662	8.42121	7.16001	14.2609	15.2028	13.9716	4.89194	25.887	14.3381	12.8051	7.18759	12.9374	36.7968	15.2994	10.5872	6.54492	14.3126	18.5864	25.8201	15.7547	18.0086
WP_018336996.1	MENNITLKIDNREISVPKGTTILEAARELGIDIPTLCYMNLKDLCIKNAPASCRICVVEVEGRKNLAPSCATRCENNMVVRTNTMRVLNARRVVLELMLSDHPSDCLVCAKSGNCELQDTAIKLGIREIPFAGEKSEFKVDLSPSIRRDASKCIYCRRCEMMCNDVQTVGALGAVNRGFSSVVMPAFDEALIDSECTFCGQCVAVCPVGALTELSHTNRLINDLANPSKTVIVQTAPAVRAALGEEFGLPAGTSVTGKMVAALRQLGFAKVFDTDFAADLTIMEEGTELLGRLNAFLNGDKEVKLPIITSCCPGWVNFFEKQFPDLLDRPSSARSPQQMFGAIAKTYWAEKMGIKREDLIVVSVMPCLAKKFESERDEFKTNGDPDVNYSISTRELAAL…	[FeFe] Group A3	[FeFe] Group A3	Bifurcating	Labile	3	[FeFe]-centre, 3 x [4Fe4S] clusters, 1 x [2Fe2S] cluster	NADH dehydrogenase, thioredoxin	0.468197	0.373678	0	0	1.41309	0	0	0	2.29851	0.919119	0	3.25196	1.37344	0	0	0	0	0	0	0	0	0.495365	0	0	0.249226	0	0	0	0	0	0.171133	0	0	0	0	0	0	0	0	0.543267	0
WP_017752954.1	MITVVLDGKQIEAEENTTILQVARDNDVYIPTLCYLKDCYNFGKCGICLVEANGRTITACTAKVKEGMIINTKSDTVKERIKKRMSKLLDSHEFKCGPCPRRENCEFLKLVIQTKARASKPFLPKDKSEYIDARSTAIMLDRSKCVLCGRCVAACKTHSGTSVMKFIKKDGKRAVGIENDLCFDKSNCLLCGQCVIACPVAALTEKPHIDRVKKALADPKKHVIVAMAPSIRTAIGELFKMGFGKDVTGKLYTALRMLNFDKIFDINFGADMTIMEEATELLERIKNGGPFPMFTSCCPAWVRQAQNYYPELLKNLSSAKSPQQIFGTATKTYYPAISGIEAKDVYTVTVMPCNDKKYEADLPEMEVNGMRCIDAVITTRELAKMIKDAKIKFTSLEDG…	[FeFe] Group A1	[FeFe] Group A1	Evolving	Labile	1	[FeFe]-centre, 3 x [4Fe4S] clusters, 1 x [2Fe2S] cluster	None	0.175704	0.0230667	0.514858	0	1.41309	0	0	1.09572	1.3791	0.919119	0.684393	0	0.686718	0	0.521209	0.53818	0	0	0	0	0	0	0	0	0	0	0	0	0	0	0	0.462051	0	0	0	0	0	0	0	0	0
WP_007656801.1	MEDTKFYHALKIDKERCIGCTHCMTKCPTRAVRIRDGKAVIRKDWCVDCGECLKACPTEAIYVEQDDFQKIFDYECRVALVPTVFIGQFSKYTTEEEIFSALYELGFTHVYQVEFTADMIHREMLRQMEQAEEKPVISSFCPAIVRLIQIRFPALVDNILLVKSPVNATATYYHQVLTEEGHSPDQIGLFYVTPCAAKIAALKSADGYSSTINGVINMDTLYNKVYHILQNRPKGYKPDCVLPPTLTKKEMRWSQTGGEAKHFSGRCLAIDEIHNVIDFLERMETTTEVRNVDFLELRACDRSCAGGVLAVANRFLTAERIMKRSMKRDKAPLIYASERLGALAYLKQHITIRPLQPNPKLLYDGSIEEVLKKMEQVRRLMCYLPGIDCGACGNPNCQS…	[FeFe] Group C	[FeFe] Group C1	Sensory	Labile	2	[FeFe]-centre, 2 x [4Fe4S] clusters, PAS domain	Histidine kinase	4.90073	7.59756	3.60401	9.29998	4.23926	0.919623	0	0	1.3791	46.875	2.73757	11.3819	3.43359	2.32935	0	0	0	0.460833	1.51208	0	0	5.07749	0	0	18.1935	1.07474	0	0	0	0.492503	11.4659	0	0	0	0	0	0	3.09773	0	1.08653	0.643165
WP_013406351.1	MENKVKIEIDNQTVEVSEGSTILDAAKSVGIDVPVLCYHPDLSTHGACRVCVVEEEESGELLASCAAPVNPGMKINTRSIRARKARRRNVELLLANHPNDCLGCNRNGSCELQDITYDLGITQEDIERVSGAVREHEIDDVGPALRRDLNKCILCGRCVRVCEEVQGVSALQFTQRGFDSVVTTAFDMPQRDVNCANCGQCASVCPVGAINEKSEIENVWAALEDDEKHVIVQTAPSIQATLGEEFDITNGTVVTGKMVAALRRLGFDKVFSTDFAADLTILEEGSEFLKKLEGEGTLPHITSCCPGWVKYAEHNYSDLLNHLSTAKSPMQMFSALGKTYYPQQSGVKAKDVYTVAIMPCTAKKFEKDREEINATRFKDTDAVLTTRELARMIKEMGIN…	[FeFe] Group A3	[FeFe] Group A3	Bifurcating	Labile	4	[FeFe]-centre, 3 x [4Fe4S] clusters, 1 x [2Fe2S] cluster	NADH dehydrogenase, thioredoxin, thioredoxin	0.132762	0.00581052	0	0	0	0	0	0	0	0	0	0	0	0	0	0	0	0	0	0	0	0.247683	1.432	0	0	2.68684	0	0	0	0.492503	0.171133	0.462051	0	0	0	0	0	0.774432	0	0.543267	0
WP_008382437.1	MTSSDVSAAPAGATATDTTARELSATINGQPVTGRAGESILECARRHGVYIPTLCELADIDHTPGTCRVCLVEIRTKGSSKTHLVTSCTTPMEDGIEIRTRTAALRAMQRLQVELLLADHDQDCATCIRHGKCDLQDVAQFVGLTQNRFFDPARVAARPVDDSSPALIRNMQRCIRCQRCIAICRDGQGVDALIQTGSGLETAVGLRYGLTQKNSACVTCGQCVLVCPTGALGERDETDRALEMMYDPELITVVQFAPAVRVGFGEEFGLPPGTNVEGQIITALRMLGADIVLDTNWGADLVIMEEGTELLHRLKKKQRPTFSSCCPAWINFVERHYPDIIPMLSSTKSPQQCVGTLAKTYLPEKMGIDPKKIRVISVMPCIAKKDEIARRQLSHDGVP…	[FeFe] Group A2	[FeFe] Group A2	Evolving	Labile	2	[FeFe]-centre, 3 x [4Fe4S] clusters, 1 x [2Fe2S] cluster	NADH-dependent glutamate synthase	0.124718	0.0206153	0	0	0	0.459812	0	0	0	0	1.36879	0	0	0	0	0	0	0	0	0	0	0.123841	0	0	0	0.537368	0	0	0	0.492503	0	0	0	0	0	0	0	0	0	0	0
WP_014553922.1	MSKLKGIYTDIVKIRRMVFAELARLALKDAASEEFDKIPYRIIDTEESTYRSSIFKERAIVAARVRLGLGMDYETNQEHKLLSEGVKDFLENENQLDKPLVNVIRFACEKCPTNAHFVTNNCRKCLAHPCSIVCPVDAITIEEKAAVIDQEKCINCGKCKKACPYEAIVNYERPCAEACGVDAIESDEYQRAKINQNNCVSCGQCIIACPFGAIADKSMIFQLLKAIKKGEDIRAIIAPSFVGQFGPLVKAEQIVAALAKLGIKEIREVSLGADFASLHEADLFAEDVPEEQPYLGTSCCPSWTYVAEKHVPEVKENISASSSPMIFAARSVKENNKDSKVVFIGPCVSKKLEALSPKVKDEVDYVITFEELAAIFVAADIELTKVESEEEINDASYYG…	[FeFe] Group B	[FeFe] Group B	Evolving	Labile	1	[FeFe]-centre, 2 x [4Fe4S] clusters	None	0.373656	0.752827	0	0.774999	0	0.459812	0	1.09572	0	0	1.36879	0	0	0	1.56363	0	0	0.460833	0	1.57458	0	2.97219	0	0	0	0	0	0.924536	0	0	0	1.38615	0	0.339987	0	0	0.433716	0	0	0.543267	0
WP_013412032.1	MEMVNITIDGKKIQVPKDYTVLQAAREAGVEIPTLCYLKGINEIGACRMCVVEVKGARSLQAACVYPVSEGMEVITNSERVRRARKVNLELILSNHDRSCLTCVRSGNCELQKLAEDLNVKQIRYEGENIRRPLDDFSPSVVRDPNKCILCKRCINVCRNVQEVGVINANYRGFKTVVSTAFDRSLNDVACTMCGQCIQACPVGALREKDSTDIVWKALADKNKYVVVQTAPAVRVALGEEFGLPIGTRVTGKMVTALKMLGFDKVFDTDTAADLTIMEEGTELINRIKNGGKLPLITSCSPGWIKFCEHYFPEFLDNLSTCKSPHEMFGAILKTYFAQKMGIDPANMFVVSVMPCTAKKFEAQREELAASGYPDVDAVLTTRELARMIKEAGIDFVNL…	[FeFe] Group A3	[FeFe] Group A3	Bifurcating	Labile	4	[FeFe]-centre, 3 x [4Fe4S] clusters, 1 x [2Fe2S] cluster	NADH dehydrogenase, thioredoxin, thioredoxin	0.202964	0.0762885	0	0	1.41309	0	0	0	0.919403	0.919119	0.684393	0	0	0	0	0	0	0	0	0	0	0.495365	0	0	0	0	0	0	1.88659	0	0	0.462051	0	0	1.05872	0	0	0	0.86067	0	1.28633
WP_006568603.1	MPEAKKSTSFHELYKELLQKQMKNEDISEADYDPHQLDCLLNPDQYAPVIHTESCESCAYDRACKNSCIFDAIEEVDGKLSIDPDKCSGCGVCIESCRLDKLAESKDIFPVLKEVRSEEKDVYALIAPAFVGQYENASPGQLRSALKAAGFKGMVEVAVFADILTLKEALEFDEHINSNDDFQLTSCCCPVWIAMIRKIYHELIPHVPGAVSPMIAAGRAVKQIHPDAVTVFIGPCIAKKKEAREPDIADAVDYVLTFQEVQDIFDAAGIQPEELADNDREHSSRAGRIYAHTGGVSEAVRSTVEKLSPGRDVPVRAQQADGVPACKAMIEQIQKGETDANFFEGMACRGGCVGGPKIIIDKDKGKRNVETYGEEAPYKTPLDNPYVMELLHRLGFKNM…	[FeFe] Group B	[FeFe] Group B	Evolving	Labile	1	[FeFe]-centre, 2 x [4Fe4S] clusters	None	4.92339	11.5409	2.05943	0.774999	11.3047	5.97755	1.43897	1.09572	8.27463	5.51471	0.684393	1.62598	26.782	0	10.9454	41.4399	8.99305	3.68666	1.51208	1.57458	5.90413	1.85762	2.864	3.56523	1.24613	3.76158	2.79539	3.69814	2.64122	3.44752	0.171133	8.77897	0	2.37991	2.11745	1.18998	0	9.29319	0	4.8894	0
WP_011879575.1	MPDNQDNHENKRKIHVSINDQELTVPEGITILEAAHEAGVKIPTLCHLDLHDFQLYNKTASCRVCMVELVDARNNRNKLVPSCVTKVQEGMMVRTDTIRAIQARRMAVELLLSNHPNECFTCPKNLECELQALADELNVRKIRWEGERMDYPKDMSSDAIVKDANKCIYCRRCETACNEVQTCGILSGIGRGFNAFVGPFANIPMVESSCTYCGQCVMVCPTAALTEVYHTDKVWEAINDPDKHVIVQTAPAVRVALGELFGMEAGTVVTGKMVTALKRMGFDEVFDTDFGADLTIMEEASELIYRLKNNKTLPILTNCCPAWVKFIEHQFPELIHVPSTCKSPHIMFGTIAKTYYAEKNGLDPDNIVVVSVMPCIAKKAEAKRPELTKDAHNNVDIVI…	[FeFe] Group A3	[FeFe] Group A3	Bifurcating	Labile	3	[FeFe]-centre, 3 x [4Fe4S] clusters, 1 x [2Fe2S] cluster	NADH dehydrogenase, thioredoxin	0.401859	0.252648	0	0	5.65234	0	0	0	0	0.919119	1.36879	1.62598	0	0	0	0	0	0	1.51208	0	0	0	2.864	0	0	0	0	0.924536	0	0	0	0	0	1.01996	0	0	0.433716	0	0	1.08653	0.643165
WP_013700376.1	MLNINNNTSNIKREILVRIAKLQLQGKLEEGVHFIPREMAPRDKPPLRCCIFHDREILRMRVLARMGISVENIDEEATLGSFAKQALEREKPTWPMLTVLDEACNGCVKAHYMVTNACQGCYARPCMVNCPRKAITVDRRATIDEKLCINCGKCMENCPYHSIIKIPVPCEEACPVGAISKDEKGHEKIDYHKCIFCGNCMRECPFGAMMDKSQLVDVIKHIMNCKKVVALYAPSIASQFKVTPGQLESSLIAAGFNRVWEVAIGADICADNEAREFEERMARGDKMMTTSCCSAYVRAVHKHVPALIPCVSETRSPMHYTAEIAKKADPDCITVFIGPCLAKKREGFDDDLVDYVITVEEISALFEAREINVAEMDKRHETIIPTASGRNFARSGGVM…	[FeFe] Group B	[FeFe] Group B	Evolving	Labile	1	[FeFe]-centre, 3 x [4Fe4S] clusters, 1 x [2Fe2S] cluster	None	0.486972	0.604799	0	0	0	0.459812	0.959312	0	0.459702	1.83824	0.684393	0	2.06015	2.32935	0.521209	0	0	0.921666	1.51208	0	0	0	0	0	0.498452	0.537368	0	0	0.377317	0.985006	0	0	0	0	0	0	0	1.54886	0	0.543267	0
WP_013273987.1	MENITIKINGMDVSAPAGSTILEAARLAHVEIPTLCFLKDMNEIAACRICTVEINGGRLAASCVYPINPGMEVLTNTPKLREYRKKTLQLILSNHDRSCLSCVRSGNCELQTLCKELGVDADDYYDGAKTPSTLDESAAHMVRDNSKCILCRRCSAVCEKVQGIGVIGPNERGFATIIGSAFDMGLGDTSCVSCGQCIAVCPTGALYEKSSIDEVAAAIADRSKHVIVQTAPAVRAGLGEEFGYPIGTNVEGKMAAALRRLGFDKVFDTNFSADLTIMEEAHEFIDRVQNGGVLPMITSCSPGWIKYCEHYFPDMTENLSSCKSPQQMFGAIAKSYYAEKMGLKPEDIVSVSVMPCTAKKFEIGRDDQDANGSPDVDYSMTTRELARMIKQAGIRFTEL…	[FeFe] Group A3	[FeFe] Group A3	Bifurcating	Labile	3	[FeFe]-centre, 3 x [4Fe4S] clusters, 1 x [2Fe2S] cluster	NADH dehydrogenase, thioredoxin	4.31293	8.68589	7.20801	3.09999	4.23926	11.9551	0.959312	0	5.05672	10.1103	0.684393	3.25196	10.3008	0	1.56363	1.61454	5.99537	3.22583	4.53625	1.57458	2.27082	4.82981	4.29601	1.78261	2.49226	4.83632	1.3977	15.7171	2.2639	2.46252	2.0536	6.93076	1.59986	3.73986	3.17617	2.37997	2.6023	5.42103	0.430335	14.1249	0.643165
WP_018525843.1	MPKITINAKTLEVPPGTTVLDAAMEAGYRIPTLCHVAGRAALGACRVCVVEIGGYPRLQAACSTPVAEGMEIQTNSPQVRXARRTVMELLLSEHQGLCTICDRDEDCELRKIAGTLGIQETPYEGARASMVLDESTAALYRNTGKCIKCRRCVSVCHEMQGVGALFPQGRGFDTLIGPAFSSPLAEVVCVQCGQCAAACPVGAIGERQQVDAVWRALSDPSTHVVVQTAPAIRAALGECFGYPPGTVVTGKMVAALRRLGFDAIFDTNFTADLTIMEEGSELLSRLRTVLADHQEAALPLFTSCSPGWINYAETFFPEILPNISSCKSPQQMFGALAKTYYADKIGVDPAKMVVVSVMPCTAKKAEAERPEMRSSGYQDVDHVLTTRELALMIKTIGLD…	[FeFe] Group A3	[FeFe] Group A3	Bifurcating	Labile	3	[FeFe]-centre, 3 x [4Fe4S] clusters, 1 x [2Fe2S] cluster	NADH dehydrogenase, thioredoxin	0.274486	0.292895	0	0	1.41309	0	0	0	0.459702	0	0	1.62598	0	0	0	0	0	0	0	0	0.454164	0.123841	0	1.78261	0.249226	1.61211	0	0	0	0	0	0.462051	0.799931	0	0	0.594992	0	0.774432	0	0	0.643165
WP_003493654.1	MNYIDISGLNCKNCYKCLRACPVKAIKFKNEKAEIVEERCISCGRCLVICPQNAKKDKPDIKHVKEAIRSGKKVVASVSSVFAGVFNVEEGKIVSALKELGVSYVEETALGGEIVTELYKDYVETTKLNNYITTSCPSAVNLIEKYFPSLIKYMIPIASSMTAHGKILKEIWGKDAFVVFIGPCIAKKTESDIYKKEKVVDAVINFDELKNWFKEMNIDLNSMPIGEFDRNAYKKTRSFTLSGGIINSMGNIIENNNLISMSVSGVEESIQVLKSMEIGEISNTFLEITACRGNCIGGPNMIKNEVSYYTRLNKVKNYIKNRDTSNTIRLLSVPDSIDFSTSFKDRHFEKKKASRKDLLKIMKSMGKHTKEDELNCGVCGYNTCIEKAQAIYEGMAETN…	[FeFe] Group C	[FeFe] Group C3	Sensory	Labile	2	[FeFe]-centre, 2 x [4Fe4S] clusters, PAS domain	Phosphatase	0.175377	0.0535804	0	0	0	0.459812	0	0	0.919403	1.83824	0	0	0	0	0	0	0	0	0	0	0	0.123841	0	0	0	0	0	1.84907	0	0	0.342266	0	0	0	0	0	0	0.774432	0	0.543267	0
WP_003514863.1	MGKKTVIPFGPQHPVLPEPIHLDLVLEDETVVEAIPSIGYIHRGLEKLVEKKDYQQFVYVAERICGICSFMHGMGYCMSIENIMGVQIPERAEFLRTIWAELSRIHSHMLWLGLLADALGFESLFMHSWRLREQILDIFEETTGGRVIFSVCDIGGVRRDIDSEMLKKINSILDGFEKEFSEITKVFLNDSSVKLRTQGLGVLSREEAFELGAVGPMARASGIDIDMRKSGYAAYGKLKIEPVVETAGDCYARTSVRIREVFQSIDLIRQCISLIPDGEIKVKIVGNPSGEYFTRLEQPRGEVLYYVKANGTKFLERFRVRTPTFANIPALLHTLKGCQLADVPVLILTIDPCISCTER	[NiFe] Group 4e	[NiFe] Group 4e	Evolving	Sensitive	6	[NiFe]-centre, 1 x [4Fe4S] clusters	NuoL, NuoH, NuoC, [FeS] protein	0.840268	0.927747	2.05943	0	0	0.919623	2.39828	0	0.459702	0	0	4.87794	0.686718	2.32935	0	0	0	1.84333	0	0	1.81665	0.247683	0	1.78261	0	0	0	1.84907	0	0	0.342266	0.462051	2.39979	0.339987	0	0	1.30115	0.774432	0	1.08653	0
WP_022847517.1	MAETVTIKIDGKKYTVESGQTILEICKKLGIYIPTLCFMEEISEGGHCGLCIVDVKGAKTFQRACITEVRDGMEIETNTPAVREVRKTVFEMILADHKVECPVCKRDETCEIRKVAKHLGFPDFEVEPIYRDEGVDNSIISREPAKCIKCQRCVNTCELIPGIGIYGYFGKGHDATVEPPESLSMSDTPCIVCGQCVVRCPTGALTERDDTEKVLEAIYDPDKVVFASFAPSVRVAIGEPFGMEPGEVVVGKLVSALRKLGFDRVYDVNFGADLTIVEEANELIERIKNGGVLPMATSCCPGWVSFVERFYPEFIPNLSSCKSPQAMLGALVKNYMKEVEGIPEENVVHVTIMPCTAKKYEASRPELSGDTDYVLTTRELARLLKRFDIDLSKLPEDEA…	[FeFe] Group A3	[FeFe] Group A3	Bifurcating	Labile	3	[FeFe]-centre, 3 x [4Fe4S] clusters, 1 x [2Fe2S] cluster	NADH dehydrogenase, thioredoxin	0.229743	0.582851	0	0	0	0	0.479656	0	0	1.83824	0.684393	0	0	0	0.521209	0	0	0	0	0	0	0	0	0	0.249226	0	0	0.924536	0	0.492503	0	0	0	0	0	0.594992	0	0.774432	0	0.543267	0
WP_007656765.1	MENIKLTIDNREVEVPKGTTILDAAKSMGIRIPTLCHMKLEDLHYENNPGACRICVVEIEGRRNLAPSCKMECTEGMVVRTHTPRVMNARKTVMELILSNHPAGCLTCSSNGYCELQTIAHDLGIREIRYQGEQSTFEIDRSPSIVRNMNKCIMCRRCETMCNNIQTVGALTAVNRGFNAAVSTAFERDIAGSTCSYCGQCVSVCPVNALSGCNTQQPVLDALANPAKIVIAQTAPAVRTALGRDFGCEPGTLVTGKMVSALRQLGFDYVFDTDFAADLTIMEEGTELLQRLSKYLSGDEEVKIPMMTSCCPGWVSFVEQHFPELRDNLSTAKSPQQMFGAIAKSYFAEKLGVDRKDIVVVSIMPCLAKKYEASRPEFAVEGNPDVDISIYTRELARLI…	[FeFe] Group A3	[FeFe] Group A3	Bifurcating	Labile	3	[FeFe]-centre, 3 x [4Fe4S] clusters, 1 x [2Fe2S] cluster	NADH dehydrogenase, thioredoxin	4.71147	8.36803	4.11887	12.4	2.82617	0.459812	1.91862	0	0.459702	41.3603	0.684393	4.87794	3.43359	0	0	0	8.99305	0.460833	3.02417	0	0	6.06822	1.432	1.78261	17.6951	1.07474	0	0	0	0.492503	16.4288	0.462051	0	0	1.05872	0	0	6.19546	0.430335	0	0
WP_010244148.1	MKTLTNQNRIKVTVNGREIEVYDNLTILQALLQEDIHIPHLCYDIRLERSNGNCGLCVVSIGPNGEKDVKACQTPIKEGMIICTNSPKLESYRKVRLEQLLSDHNADCVAPCVMTCPANVDIQTYLRHVGNGNYESAIRTIKDRNPFPVVCGRVCPHPCEAQCRRNLVDSPVAINYVKRFASDWDMSQPHPWVPTKSPSTGKKIAIVGAGPSGLSATYYSAIKGHDVTVFERQPHAGGMMRYGIPEYRLPKATLDKEIDIIKSLGVKVMTGKSLGIHIRLEDLHKDFDAVYLAIGSWNATPMHIEGEKLDGVWLGIQFLEQVTRNAEINLGNNVIVIGGGNTAIDCARTALRKGAKSVKLVYRRTQEEMPAEPYEVEEALHEGVEMLFLMAPTKITSEG…	[FeFe] Group A1	[FeFe] Group A1	Evolving	Labile	1	[FeFe]-centre, 3 x [4Fe4S] clusters, 1 x [2Fe2S] cluster	None	2.35166	4.30195	3.08915	2.325	4.23926	5.05793	0	1.09572	0.459702	2.75736	2.05318	3.25196	5.49374	9.31739	2.60604	0.53818	0	1.3825	4.53625	0	1.36249	1.60994	0	3.56523	1.49536	0.537368	1.3977	10.1699	3.01854	1.47751	0.171133	1.38615	0	3.73986	0	3.56995	0	4.64659	0.86067	2.17307	1.28633
WP_009202817.1	MRGIQTPVRNVRRRIFKEIAKFGYEQRNLQDLEDLPYEIIPGEVAKYRDSIYRERAIVGERLRLAMGMSLNPADKPTRITKEIDESNISEKYYEPPLLQVIPSACNECKEKAFIVGEQCQGCMAHPCMEVCPKKAISFKDGYSYIDQEKCIKCGQCKKVCPYGAIYERKRPCANACGVGAIETDYAGRAKINPDKCVSCGMCMVNCPFGAIADKSQIYQLIKAMNEGAEVIAILAPAFVGQFGPKATPNKIKAALFDIGFADVWEVAVGADAGALEEAKHYVQSVATGKLPFLLTSCCPSWSMLGKKYFPEVIDEISNALTPMVATARAARITSPNAKIVFVGPCVAKKLEASRRTVRSEVDFVITFEELAGMFDAKEIDFNTYEKEEELNDAFGAGRG…	[FeFe] Group B	[FeFe] Group B	Evolving	Labile	1	[FeFe]-centre, 2 x [4Fe4S] clusters	None	62.9003	89.4573	78.7733	30.9999	8.47851	38.1644	62.3553	43.8288	36.7761	45.9559	45.1699	121.949	17.8547	51.2457	38.0483	9.68724	80.9375	38.2491	120.967	118.093	112.633	40.7438	8.59201	37.4349	50.5929	56.9611	37.7378	83.2082	76.2181	103.918	40.0452	142.312	15.9986	210.112	93.1677	74.374	86.7433	58.8569	45.6155	90.7255	82.9682
WP_028830146.1	MKGIFSDIINYRRKVFAEVADFAYGDKDLSELPKSVFNIIPGEEARFRTDVFKERAIVGERIRLAMGLDIRDAATFGLISDGIENVDVDKRIYEPPLVNVITFACEACPTKTYEVTSNCRRCIGHPCQNVCPVNAITINKKQAVIDKEKCIKCGKCKDICPYGAIIKYDRPCAEACGVNAIESDSLGRAKINYDKCVSCGQCMQACPFAAIGDKSQIYQLVKAIRNQENMYAIVAPAFVGQFGPIANPTQIFEAIKRLGFKEVLEVGIGADIGTIHEAEEFLDEVPNKVPYMGTSCCPAWLSMVQKMFPDQARYISDTSTPMIATAQFIKKNNEDAKVVFIGPCIAKKLEALGEKVHKYVDFVITFEELMGLFVSRGIEVSEIEVDYKIQDASKLGRGF…	[FeFe] Group B	[FeFe] Group B	Evolving	Labile	1	[FeFe]-centre, 2 x [4Fe4S] clusters	None	0.298965	0.313476	2.05943	0	0	0	0	0	0	0	0.684393	0	0	0	0	0	0	0	0	0	3.17915	0.371524	1.432	0	0	0.537368	0.698849	0	0	0	0	0.462051	0	0.339987	2.11745	0	0	0	0	0.543267	0.643165
WP_018526489.1	MNKQYAVYTAETNCQDCCRCLRSCPVKAIRVEKGRAAIVPELCVACGTCVDACPGGAKKIRSDIGRVRALLARRERVLVSVAPSYAAEFPEVRPGAFAAAMKELGFAGTAETAIGADRVTHALADLLGDPPQPLSLSTACPAAVDFIRKYMPEFAPCLTPLGSPMVAHSDILRKEHNESIGVVFIGPCIAKKVEADADPLNPEAALTFGELRQFMKEEGVSFRDTPGMDDSALQSGRSGAVYPVAGGMIEALRELGACQDVDCVAVCGIDSIWHTLKGLDPSRMDRPVFLEMLACEGGCINGPSSDKKRARLLQEQAIRRRHRSLLLQGAPAPVDADPVPIGQSFSPAVPLSVVADEQSLRIALERVGKYVWEDELNCGGCGYDTCREFAASMLEGRAE…	[FeFe] Group C	[FeFe] Group C3	Sensory	Labile	3	[FeFe]-centre, 2 x [4Fe4S] clusters, PAS domain	Phosphatase, thioredoxin	0.172463	0.0269389	0	0	0	0	0	0	0	0	0	0	0	0	0	0	0	0	0	0	0	0.247683	2.864	0	0	0	0	0.924536	0	0	0	0	0	0.339987	0	0	0	0	0	1.08653	0
WP_012863017.1	MKHNLITLTIDHKTVEVPEGTTILAAAKSVGISIPTLCYLNLSDFGCVNTPSSCRMCLVEVEGRRNLAPACVTPASDKMTVSTNSVRALKTRKTMLELLLSDHPKDCLTCQKSGNCELQSLADKFSIRDIKLKGEQSAYRLDISKSLIRDMDKCIMCRRCETMCNEVQTVGVLSAINRGFESVIATAMEINLSDSVCTYCGQCAAVCPTGALVENDATWDVVKALGDPEKTVIVQTAPSVRAALGEEFGLEPGTLVTGKMVAALRGLGFDKVFDTDFGADLTIMEEASEFLDRLTRHLDGDTSVKLPILTSCCPAWVNFFEHNFSDLLDVPSTSKSPMQMFSAVVKNVYAQELGVDRKNLVVVSVMPCLAKKYEASRDEFSIGNDYDTDIVLSTRELAK…	[FeFe] Group A3	[FeFe] Group A3	Bifurcating	Labile	3	[FeFe]-centre, 3 x [4Fe4S] clusters, 1 x [2Fe2S] cluster	NADH dehydrogenase, thioredoxin	0.101904	0.00739849	0.514858	0	0	0	0	0	0.919403	0	0	0	0	0	0	0	0	0	0	0	0	0	0	0	0	0	0.698849	0	0.377317	0	0	0	0	1.01996	0	0	0.433716	0.774432	0	0	0
WP_013274254.1	MQTFKQLYESMVKSVLNNDLDPEKDLEISYDPHHLDCLLNPKKHPVVIRTGACSCSKEDQEECLKRCPFGALEIKKDGIAVNPELCLGCEKCIEGCAPEKLKASTDIIPALKAVRSSKGLVYAMIAPAFLGQFSKDVTPGKLRTALKTVGFDGMLEVALFADILTLKEALEFDKNINDADDYQLTSCCCPMWIGMIRKVYHQLIPHVPGSVSPMVACARVVKALHPDALTVFIGPCLAKKAEAREKDLAGAVDYVLTFQEVKNIFDALGIDPAVMEESEKDHSSKAGRIYARKGGVSEAVENTVRAINPQKKTEIRTKQADGVPACRKMIQDIMEGRIEANFYEGMGCVGGCVGGPRSILGVEQGTELVNDYGEKATYGHPAENPYVIELLHRLNLDSI…	[FeFe] Group B	[FeFe] Group B	Evolving	Labile	1	[FeFe]-centre, 2 x [4Fe4S] clusters	None	0.268921	0.251258	0	0	0	0.919623	0	0	0.459702	0	0.684393	0	0	0	0	0	0	0	0	0	0	0	0	0	0.498452	0.537368	0	0	0	0.492503	0.171133	0	0.799931	0	1.05872	0	0	0	0	0	0
WP_013969799.1	MALQQRPVIKVLEEKCVNCHRCISVCPAKMCNDGSGSYVKINSDLCLGCGACISACTHGARIGIDDWDTFQEALLRGEKIVAIMAPAAASGFEGRYQQLAGFLQSLGVEAIFDVSFGAELTVYSYLQYKKTQDPECIIAQPCPAIVSYIETYRPELIPLLAPADSPMVHTFKMIREFYPAYRNYKLAAISPCYAKRREFDAVGLGDYNITFRSLQAYIESHGIDLSRYPAVEFKGPPAERAVLFSSPGGLMRTVARHVPDIASKTRKIEGPEVYHYFAHLGESIQSGEAPIFELVDCLSCEMGCNGGPGTLNQGKNLDKIEKKIEDRSRGAIQRYRSSRKLLKTIKQFWKPDLYVRKYVDRSSMFKKMIREPDSNFINEINRKTYKESERDILDCSSCG…	[FeFe] Group C	[FeFe] Group C2	Sensory	Labile	1	[FeFe]-centre, 2 x [4Fe4S] clusters, PAS domain	Fusion with methyl-accepting chemotaxis protein	0.252739	0.153057	0.514858	0	0	0	0	0	0	0	0	1.62598	1.37344	0	1.56363	0	0	0	0	0	0	0.123841	0	0	0.249226	0.537368	0.698849	0	0	0	0	0	0	0.679975	1.05872	0	0	0	0.430335	0	0.643165
WP_013298247.1	MSVINFKEANCRNCYKCIRYCPVKAIKVNNEQAEIVDYMCIACGRCLNVCPQNAKTVRSDIEKVKAFIKKGDKVVFTIAPSYPALVGSGRAFKFLNALKSLGAEMIIETSVGAMFISKEYERYYNDLKYDNLITTSCPSINYLIEKYYPDLINCLVPVVSPMIAVGRVVKKVYGNEIKVVFIGPCLAKKVEMNDFSCEDAIDAVLTFEEIIEWLDGDGINIDSREEFTDCVDTMMPFKLYPIEGKTIDCMDVDLNLRKVVSVSSIDNVKDLLNDIRSGNLHGYWIEANACDGGCINGPAFGRSNSGVVKRKEEVINYSNTKANFINDISNMIDCSVDFTRKFINLSDKWKMPSENEIKNILSKIGKFTKEDELNCGACGYDTCREKAIAVFNGMAEPYM…	[FeFe] Group C	[FeFe] Group C3	Sensory	Labile	3	[FeFe]-centre, 2 x [4Fe4S] clusters, PAS domain	Phosphatase, thioredoxin	0.200474	0.0690002	0	0	0	0.919623	0.479656	0	0	0	0	1.62598	0	0	0.521209	0	2.99768	0	0	0	0	0.495365	0	0	1.24613	0	0	0	0	0	1.19793	0	0	0	0	0	0	0	0	0	0
WP_012803120.1	MGKSTVIPFGPQHPVLPEPLHLDLVVEDETVVEAIPQIGFIHRGLERLTETKDYNQFIYVAERICGICAFGHSMGYAETIEHLMGIEVPPRAQYLRVIMHEMSRIHSHVLWLGLAADAFGFESLFMHCWRLRERVLDLFEAMTGGRVIFSANLVGGMVRDQDAQILATVKERLEGIKADYQQISDTFLKDSSVKGRLVGVGYISPEDAAAWSMTGPFARASAVNNDARCKGSAAYAALPNFEPILSHDGDCYARVEVRIREVLQSIDIICQLIDTIPAGEVLTKVKGSPAAGSQACHALEQPRGECYYYASGNGTKFLSRMRMRTPTSANLAGMAMALKGCDLADVNMIVLTIDPCISCSER	[NiFe] Group 4e	[NiFe] Group 4e	Evolving	Sensitive	6	[NiFe]-centre, 1 x [4Fe4S] clusters	NuoL, NuoH, NuoC, [FeS] protein	0.191275	0.0265796	0	0	0	0	0.479656	0	0.459702	0	0	0	0	0	0	0	0	0	0	0	0	0.123841	0	5.34784	0	0	0	0	0	0	0	0	0.799931	0	0	0	0	0	0	0	1.92949
WP_007047619.1	MAKRSIVPFGPQHPVLPEPIHLDLVLEDEVVVEAVPSIGFVHRGLEKLVETKDFKEYVYIAERVCGICSFGHGLGYCQTLEHIMNVEVPPRGRYLRTIWMEMSRIHSHLLWLGLLADAMGFESLFMESWKLREKILDMFDATTGGRVIFSVNCIGGVLKDMDETMLKNIVDTCNDMEKELKPIADAFLRDYTTGSRLHGLGVLTPEDATLMGAVGPMLRASGVSYDARKLGYAAYGELDLEPVTATEGDSYARCEVRIREIHQSFDLIRQAAAKIPAGPIAVPVKGFPQGEYFTRIEQPRGEAIYYVKANGTKFIERFRLRTPTTSNIPPMLNMLKGCQLADVPLLILTIDPCISCTER	[NiFe] Group 4e	[NiFe] Group 4e	Evolving	Sensitive	6	[NiFe]-centre, 1 x [4Fe4S] clusters	NuoL, NuoH, NuoC, [FeS] protein	2.24526	3.59565	11.8417	6.19999	1.41309	6.43736	0.959312	1.09572	1.83881	0	1.36879	0	4.80702	2.32935	1.04242	0	0	1.84333	1.51208	0	2.27082	1.85762	0	0	0.249226	3.22421	0	20.3398	0.754635	0	0	0.462051	0	3.05989	0	0.594992	2.16858	3.09773	0.430335	3.2596	0
WP_028318925.1	MIKRQAATLTIDGRPVAIDGEKNLLELVRKVGIDLPTFCYHSDLSVYGACRLCLVDVDGRGILGACSTPPEPGLVVRTNTQELREIRKIAVELLLANHDRECTSCVRSGSCQLQDIARRLGITTIRYRSIHQPKPVDASSPSLIRDPNKCVLCGDCVRFCDEIQSVGAIDFAHRGHDAAVLPAFGRDLGAGECVNCGQCASVCPTGALAPASEIEAVWQAIYDPGTVVVAQIAPAVRVAIGEQFGSEYGLNTTGQVVAAMKRMGFDIVYDTSFTADLTVVEEANEFIARKSNGERLPLFTSCCPGWVKFAEQYFPQLLGNLSSCRSPQQMMGSMVKHTLPAQLGRERKDIVMVSIMPCTAKKFEARRPEFRTAGIPDVDYVLTTQELARMIEESGLSLN…	[FeFe] Group A3	[FeFe] Group A3	Bifurcating	Labile	3	[FeFe]-centre, 3 x [4Fe4S] clusters, 2 x [2Fe2S] cluster	NADH dehydrogenase, thioredoxin	0.249001	0.0527218	0	0	1.41309	0	0	0	0	0.919119	0	4.87794	0	0	0	0	0	0	0	0	0	0.495365	0	0	0	0.537368	0	0	1.13195	0	0	0	0	0	0	0	0	0	0	0	0
WP_022746312.1	MSKSKKHRVQEDNIIQMNKKKCIGCTACAFTCAKETKISVLKAVDNGRRTVDPKQVTFGASGCIYCGQCTLACPTTAINVRNDVSLVKEALNSGKYLILTAAPAVKATLGEEFSLPIGTNVGGKIAPSAKKMGFQNVFDTDFGADMTVIEEGTELIKRIVSKENLPMFTSCCPAWVRYVELFHPEILKNVSTSKSPQQMMGASIKTYFADTYNVLPTNIVTVSVKPCTAKKYEAQRDEMGRNGYKDIDIVLTIREYAQLLKEKGINITAIPDESSDPFMGEYTGAAVIFGASGGVMQATLRTVANYLKGDVAEVNNIKFNKIDGYEDIKESIISLGGQNYKVAIVNGLKEIEKFLSGRKWKEYLFVEVMACPGGCINGGGTPRIEMKSKINEKLCIACG…	[FeFe] Group A1	[FeFe] Group A1	Evolving	Labile	1	[FeFe]-centre, 2 x [4Fe4S] clusters	None	5.1607	7.31834	2.05943	24.025	1.41309	3.67849	0	1.09572	0.919403	2.75736	2.05318	3.25196	2.06015	9.31739	2.60604	0.53818	11.9907	6.45166	24.1933	0	0.454164	6.81127	4.29601	1.78261	7.47678	4.29895	2.09655	0.924536	2.2639	0.985006	9.75459	0.462051	0	0	0	1.18998	0	0.774432	1.291	4.34613	0.643165
WP_021876669.1	MKNIIIDGKKIEAKDDQSILKIAKENGIEIPALCFLEECNNIGQCGTCLVEIEGQERLARACCVKPKEGDVISTNSERVQEEVKKTVSALLDKHEFKCGPCKRRENCEFLKLVIKTKGRASKPFVVADKSEYIDDRSKSIVLDRTKCVNCGRCVAACRVKTGTRAITFQKVNDERIVGPENLKCFDDTNCLLCGQCVAACPVDALSEKSHTERVKDALENPEKHVIVAMAPAVRTSMGELFKMGYGVDVTGKLYTALRKLGFNKIFDINFGADMTIMEEATELIQRIKANGPFPMFTSCCPSWVRQVENYYPELLENLSTAKSPQQIFGAASKTYYPETYDIDPSRVFTVTVMPCTAKKYEADRKEMQNNNLRNIDAVITTRELAKLIKEAKIDFANLE…	[FeFe] Group A1	[FeFe] Group A1	Evolving	Labile	1	[FeFe]-centre, 3 x [4Fe4S] clusters, 1 x [2Fe2S] cluster	None	0.143023	0.072546	0	0	0	0	0	0	0	0.919119	0	0	0	0	0	4.84362	0	0	0	0	0	0.123841	0	0	0	0	0	0	0	0	0	0	0	0	0	0	0	0	0	0.543267	0
WP_018248337.1	MSKNVSEVTKLRRRVFSSISKLAFEDDLEEKIDQLPEKLIPDQGLGYRCCAHKERAIVNQRIKSALGLSAKGNSKDLKSLATEALNLETVEGHTIGVLDIACDRCPLDKYRVSDACRNCVDHSCINACPKDAIVIVQNRAYIDQNKCIECGLCQKACSYNAILKMSRPCETACGIDAIKADSNRQAKIDYNKCVSCGSCIQACPFGAITYKSEILQTINLLKTEEVIAILAPAFVGQFGPKIKTTQIKKGLKKLGFKEVKEVALGADIVAIEESKEFLNKVPDKQDYLTTSCCPSFLTLIKQEFPKLLENSSSTVSPMVALARVLHQEDPEAKVVFIGPCIAKKDEALNETSIDTVLTFEELGSMFVGAGINLANIEEDNEMEGVSDAGRTFARSGGLI…	[FeFe] Group B	[FeFe] Group B	Evolving	Labile	1	[FeFe]-centre, 3 x [4Fe4S] clusters, 1 x [2Fe2S] cluster	None	0.762077	0.682754	0	0	0	1.83925	0	0	0.459702	0.919119	0	0	0	0	1.04242	0	0	1.3825	0	0	0	0	0	0	0	0	2.09655	0	0.377317	0	0	0	0	0	0	0	0	0	0	0	0
WP_004630049.1	MSMVNITIDGKKLQVEKDMTILEAARQANIKIPTLCFLKDINEIGACRMCVVEIKGARALQAACVYPVAEGLEIYTQSPNVREARKVTLELILSNHDKKCLTCVRNRNCELQTLSEELNINELRFEGESTDMPLDNFSPSIVRDPNKCILCRRCVSVCRNVQTVSVISAAERGFKSVISCAFDKSLADVPCTMCGQCISVCPVGALKERDDTGRVWEALADPELHVVVQTAPAVRVAIGEEFGLPIGSRVTGKMVSALSRLGFAKVFDTDTAADLTIMEEGTELLNRIRNGGKLPVITSCSPGWIKFCEHNYPEFLDNLSSCKSPHEMFGAVLKTYYAEKTGIDPAKIFVVSIMPCTAKKFEAQRPELSAAGFADVDVVLTTRELAKMIKEAGIDFNSL…	[FeFe] Group A3	[FeFe] Group A3	Bifurcating	Labile	4	[FeFe]-centre, 3 x [4Fe4S] clusters, 1 x [2Fe2S] cluster	NADH dehydrogenase, thioredoxin, thioredoxin	0.108831	0.018853	0	0	0	0	0	0	0.459702	0	0	0	0	0	0	0	0	1.3825	0	0	0	0.247683	1.432	0	0.498452	0	0	0	0	0	0	0	0	0.339987	0	0	0	0	0	0.543267	0
WP_015720170.1	MARTTLPFGPQHPVLPEPIHFSLVLEDEIVVQAIPKLGYVHRGLEKMAEIRDHNQMIQIVERTCGICSTLHAMCYCQGIEALMGVQVPDRAKFLRTVWAEMHRIHSHLLWLGLLADAFGFESLFMQAWRIRERIMDLQEATSGNRVIVSVNQVGGVKRDIKPETQKWILDTLKLVEKEVLQLKSTLMDDYTVKKRTVGIGVLSKEKAFALGACGPMLRASGIPQDMRQLGYAAYPFLDFAPVVETDGDSYARTVCRFNEILQGIDLIRQAFAKLPEGELSVKVTGLPTGEVVSRVEQPRGECMYYIKANGKKFLDRLRIRTPTFSNVAPLLELLPGCELADVPVLILTIDPCISCTER	[NiFe] Group 4e	[NiFe] Group 4e	Evolving	Sensitive	6	[NiFe]-centre, 1 x [4Fe4S] clusters	NuoL, NuoH, NuoC, [FeS] protein	0.142431	0.0290491	0	0	0	0	0	0	0	1.83824	0	0	0	0	0	0	0	1.84333	0	0	0.454164	0	1.432	0	0	0	0	0	0.754635	0	0	0	0	0	1.05872	0	0	0	0	0	0
WP_019225315.1	MTHVQQTHPAKKMIDFKINHQYLRVPEGITILEAAHKARVRIPTLCHLDLHDIKMVNQTASCRVCMVELIDEKTNRNKLVPACVTTITDGMEVLTHTLTAITARRMAVELLLSNHPNECFTCPKNGECELQALAAELGVRHIRWEGERMNYPKDVSSEAIVKDANKCIYCRRCETMCNKVQTCGILSGIGRGFEAFVGPAFNIPMVESSCTYCGQCVQVCPTAALTEINHTDKVWEALNDPDKYVIVQTAPAIRVAIGEIFDMEPGTIATGQLVTALKRIGFNAVFDTDFGADLTIMEEASELIYRLQNNKTLPILTSCCPAWVKFIEHQFPELLEVPSTCKSPHIMFGTIVKTYYAEKNGIDPDNIVVVSVMPCIAKKAEAKRPELTKDEHNNVDIVV…	[FeFe] Group A3	[FeFe] Group A3	Bifurcating	Labile	3	[FeFe]-centre, 3 x [4Fe4S] clusters, 1 x [2Fe2S] cluster	NADH dehydrogenase, thioredoxin	0.114435	0.0218741	0	0	0	0	0	0	0	0.919119	0.684393	0	0	0	0	0	0	0	0	0	0	0.495365	0	0	0.249226	0.537368	0	0	0.754635	0	0	0.924102	0	0	0	0	0	0	0	1.08653	0.643165
WP_012956197.1	MILPIGPIHPGLKEPLRLKLQTQGEKVIKAEIDYGYVHRGIEKIMEGKTWQKCIYLSERICGICSYEHTQTFAETLEGISGVQAPLRAQYLRVITNEIDRIQSHLLANSTFFKTLDHETLFMHVLALREYAMDSLELLTGNRVNLGWNVVGGVRMDADERHFNAILENMKKIEDGFDRHVALFEEAPIVALRAKGVGVMTKEEAIKGHAVGPIGRASGIKHDLREEHYTYKDHFDFKPIWRKEGDNYARTLNRLYEVEQSIDLVRQAIENMPKGDIRTPVDIPSGYGEWRNEAPRGEVRYMAETNGDLIKRISIRTPSIMNIDSCARYMLKDVATVADAVSTYASSDPCIACTERVAITDIDSGKYTTKDFFEVK	[NiFe] Group 4d	[NiFe] Group 4h	Evolving	Sensitive	20	[NiFe]-centre, 1 x [4Fe4S] clusters	NuoH, NuoL, Two polyferredoxins, eleven TM proteins, three hypotheticals	0.105526	0.0117547	0	0	0	0	0	0	0.459702	0	0	0	0	0	0.521209	0	0	0	0	0	0	0	0	0	0.498452	0	0	0	1.50927	0	0	0	0	0	0	0	0	2.3233	0	0	0
WP_012302631.1	MQQETTTTETGIKRVTDKEAQASGHKVKLIIDGREVTAPEGANLVDTAREHGIDIPTLCYLKGVSEPGCCRVCLVEVEGARTLPAACVTPVREGMVVRTNTSRVRRTRRRVVELLLTEHHADCPVCPRAETCELRAVAARVGLNRLRLPNRRRRRQLLEENPFMVRDPEKCIKCRRCVEVCRKIQGVDALGAAGRGFDTVIGPAFGDNSVEAACISCGQCLMSCPTGALTEREYIHEVWKAIDDPDRQVVVQTAPAIQVTLGEEFGMPVGTVVTGKMVSALRRIGFDTVFSTEFAADLTIMEEAHELLERLEGKGDLPLISSCSPGWVKFCEHYYPEFLDNLSTCKSPQEMLGALVKSYYAEKEGLDPARLVTVAVMPCTAKKFEAARPELVSREGRRD…	[FeFe] Group A3	[FeFe] Group A3	Bifurcating	Labile	3	[FeFe]-centre, 3 x [4Fe4S] clusters, 1 x [2Fe2S] cluster	NADH dehydrogenase, thioredoxin	0.137235	0.0356797	0	0	0	0	0	0	0	0	0.684393	0	0	0	1.04242	0	0	0	0	0	0.454164	0	1.432	0	0.498452	0	0	0	1.13195	0	0	0	0	0	1.05872	0	0	0	0	0	0
WP_021801498.1	MANNRTEFIQSALGSVFTVFSEEQLKELRGKNRKIAICGKINNPGIIDIPEGATLQDIIELCGGIINKSHFKAAQIGLPFGGFLTESSLNKEFDFDLFYENIDKTIIVLSEEDCIIQYQMFYIEYLLAKVKEGSYKNYEIVVDEITNMLKTLDRISKGVSNMRDVYHLRNLAQIVKGKMKQKHNSMEDIITTFYHEIEEHIEDNKCYTAQCNHLIKLTITPKCIGCGACKRACPVDCINGEVRKQHYIDYNRCTHCGACVSACPVDAIKTGDNTLKFIRDLATPNKVVITQMAPAIRVAIGEAFGFESGENVEKKLAAGLRKLGVDYVFDTTWGADLTIMEEAAEFQERLEGHLAGDTNVKLPILTSCCPSWIKFIEENYADMLEVPSSAKSPMQMFAT…	[FeFe] Group A1	[FeFe] Group A1	Evolving	Labile	1	[FeFe]-centre, 2 x [4Fe4S] clusters	None	0.28973	0.285816	0.514858	0	0	0	0	3.28716	0	0.919119	0	0	0	2.32935	0.521209	0	0	0	0	0	0.908327	0.247683	0	0	0	0	0	0	0	0	0	0.462051	3.99965	1.35995	0	0	0.433716	0	0	0	0
WP_018703126.1	MAHITEIVSIRRSVLAELAKLTREGNLVAEIENSAFSLVSENGSRYRCCVHKERAVLKERFNLAMGQEVDMPLAEAAQRTLAGQYAQMPIISVLPEACDQCPIDKFFVTNACRNCIAHNCKNSCPKNAIMIVQNQAYIDKTKCVECGMCKKSCSYGAIIEVNRPCEGACELKAIKAGADRKAVIDYDKCVQCGGCKVACPFGAISDRTYLVQVLRAIDAGKQVHALLAPAFIGQFGAKVQPGQVVAGLKKIGFSEIEEVSFAADIVTLEEAKEFAETVPQERPFMTTSCCPAFVGMVDKHLPQVKELVSSTVSPMIAAGKVVKEKNPEAVTVFIGPCVAKKYEAEVKGQGVIDYVLTFEELQGIFEGLEIDLSAIEAVPFQTAASRDGNIFARAGGVEQ…	[FeFe] Group B	[FeFe] Group B	Evolving	Labile	1	[FeFe]-centre, 3 x [4Fe4S] clusters, 1 x [2Fe2S] cluster	None	0.107878	0	0	0	0	0	0	0	0	0	0	0	0	0	0	0	0	0	0	0	0	0	1.432	0	0.249226	0	0	0.924536	0	0	0	0	0	0	1.05872	0	0	0	0	0	0
WP_013771726.1	MHEGQESEHVTVTVDGRSMQLREGTTLLRALQAEGVDVPSLCHDGRLERANGSCGLCVVEVGTGADGATRDVKACITPVSAGMVVTTVNPRLREYRAVRLEQLLCDHNADCVAPCVQTCPANIDIQTYLHHVATGNFEAAIRVIKDRNPFPSACGRVCPHPCEAECRRNLVDEPVAINHVKRFVADWDRAREEPWTPRLADPSGKRIAVVGAGPSGLSAAYYAALAGHRVTVFEKEDRPGGMMRYGIPEYRLPKATLDEEIAFMEAIGVEIVTGKALGTHLRLDDLRREHDAVYLAVGSWRATPLKLDGEHLPGVHLGIDWLRGVVQGVDEPVGDTVVVVGGGNTAIDCVRTALRRGARDVKLVYRRTRDEMPAEPLEIEEALHEGVDMVFLAAPTGIT…	[FeFe] Group A1	[FeFe] Group A1	Evolving	Labile	1	[FeFe]-centre, 3 x [4Fe4S] clusters, 1 x [2Fe2S] cluster	None	18.0736	72.4209	20.0795	10.85	19.7832	19.3121	17.7473	16.4358	14.2507	8.27207	21.2162	11.3819	41.2031	13.9761	20.8484	3.22908	14.9884	18.4333	12.0967	6.29831	11.8083	22.1676	20.048	8.91307	23.4273	29.0179	23.7609	36.9814	17.7339	11.8201	15.2309	17.0959	15.1987	15.9794	17.9983	15.4698	14.3126	17.0375	13.7707	18.4711	16.0791
WP_015712312.1	MVNLKINGIDVTVEEGTSILNAARKVNVKIPTLCYSPDLPPWASCGLCIVRTGGPGSPRMARACTTPCENNMQIITHDPEILATRRTVVELILSNHPSDCLQCPRNGNCELQTLAAEFGIRELPFKHIANGLQIDDSNPAIVLNPEKCIRCGRCVKVCQEVQNVWAIEFLGRGIKGRIASAADAPLGESPCIKCGQCAAHCPVGAIYERDDTVKVWSALQNPDVHPVVQIAPAVRVALAEEFGLPPGTVFTKKIYAALRRLGFKTVFDTNFSADLTIMEEGTELVKRLTTKGSDIPLITSCCPAWVDYMEKYYADMIPNFSTAKSPQQMMGAMIKAYWAEKAGVDPNKIYSVSVMPCTAKKWESHRNDDMKSAGHGFDVDIVITTRELARMIKQAGIEI…	[FeFe] Group A3	[FeFe] Group A3	Bifurcating	Labile	3	[FeFe]-centre, 3 x [4Fe4S] clusters, 1 x [2Fe2S] cluster	NADH dehydrogenase, thioredoxin	0.285982	0.181922	0	0	0	0	0	0	0	0	0.684393	0	0	0	0	1.07636	2.99768	0	1.51208	0	0	0.619207	0	0	0.498452	0	0.698849	0	0.377317	0	0	0	0	0	0	0	0.433716	0	0	0	0
WP_013403316.1	MEMVNITIDGKKIQVPKDYTVLQAARKAGVEIPTLCYLKGINEIGACRMCVVEVKGARSLQAACVYPVSEGMEVITNSERVRKARKVNLELILSNHDRSCLTCVRSRNCELQKLAEDLNVKQIRYEGENIRRPLDDFSPSVVRDPNKCILCKRCINVCRNVQEVGVINANYRGFRTVISTAFDRSLNDVACTMCGQCIQACPVGALREKDSTDIVWKALADKNKYVVVQTAPAVRVALGEEFGLPIGTRVTGKMVTALKMLGFDKVFDTDTGADLTIMEEGTELINRIKNGGKLPLITSCSPGWIKFCEHYFPEFLDNLSTCKSPHEMFGAILKTYFAQKMGIDPANMFVVSVMPCTAKKFEAQREELAASGYPDVDAVLTTRELARMIKEAGIDFVNL…	[FeFe] Group A3	[FeFe] Group A3	Bifurcating	Labile	4	[FeFe]-centre, 3 x [4Fe4S] clusters, 1 x [2Fe2S] cluster	NADH dehydrogenase, thioredoxin, thioredoxin	0.132487	0.028906	0	0	0	0.919623	0	0	0	0.919119	0	0	1.37344	0	0	0	0	0	0	0	0	0.123841	0	0	0	0	0	0	0.754635	0	0	0	0	0	0	0	0	0	0	0	0
WP_013275594.1	MAIIEINQELCKGCTLCSQVCSVEACSGEPLIPHGIDERRCVNCGQCVVTCPAGAARDRSDLERVKEALEDDSIIKVVQSAPAMRVTLGEEFGMEPGTIVPGRMASAFRKMGFDRVYDTCFAADLTVMEEGHEFLERMEKGGPFPMFTSCCPAWVFFMEKNYPDLVHHLSSCKSPQQMFGAVVKAYMAEKEGIDPARIFMLSAMPCTAKKFEAARSEMNSSGARDVDAVLTTRELAQLIKDRQLELADLPEEDFDIPFGEYTGAGALFGTSGGVMEAALRTVAKKLTGKPLKSIAFEPLRKGGAFREAVIDIGNKKVKIAVVHGLKNIIPVLEEIRKGNSDYHFIEVMTCPDGCIGGGGQPRIPKRSLRQKTVRKRKEALYFYELGLPKIEAGDNPSIK…	[FeFe] Group A4	[FeFe] Group A4	Evolving	Labile	3	[FeFe]-centre, 2 x [4Fe4S] clusters	FeS protein, FeS protein	0.213023	0.201928	0.514858	0.774999	0	0	0	0	2.75821	0.919119	0	0	0.686718	0	0	0	0	0	0	0	0	0.619207	0	0	1.49536	0	0	0	0	0	0	0	0	0	0	1.78498	0	0	0	0	0.643165
[truncated: 1,043 more rows]
[truncated: 103 more columns]
