# Supplementary material for: Reshaping of bacterial molecular hydrogen metabolism contributes to the outgrowth of commensal E. coli during gut inflammation
Source: eLife. 2021 Jun 4;10:e58609. doi: 10.7554/eLife.58609 (PMC8177889; doi:10.7554/eLife.58609)
Supplement: Figure 1—source data 3. [file elife-58609-fig1-data3.xlsx]

## Sheet: Figure 1-Source Data 3
Figure 1-Source Data 3. Mapping of metagenomic sequencing of non-IBD controls and patients with ulcerative colitis to hydrogenases
NCBI Accession	Protein Sequence	Previous Class	New Class	Activity (predicted)	Oxygen-Tolerance (predicted)	Subunits (predicted)	Metal Centres (predicted)	Accessory Subunits (predicted)	average non-IBD control	average ulcerative colitis	control1	control2	control3	control4	control5	control6	control7	control8	control9	control10	control11	control12	control13	control14	control15	control16	control17	control18	control19	control20	control21	control22	control23	control24	control25	control26	control27	control28	control29	control30	control31	control32	control33	control34	control35	control36	control37	control38	control39
WP_008538939.1	MEELINLKINNMPISVKKGTKILQAAQMLHIDIPHLCYHPDQRIKARCRICSVEVVGQRRLLAACSTECWEGMEVFTDTKVVRDTQRGILQLIMADHEENCLTCPRNGNCVLQQLCSRFNVLRPNIPHVGQHIEKRGANPSLVHDPEKCVKCGRCIRACKEIQGIEVLGFAGRSTNIHVTTPFDAEFDNTKCVLCGQCSLACPVGALVEKDDTDRVLDAIFDPNKTVIVQTAPSVRIALGDEFGMPKGSIVTKKMVTALRMIGFDKVFDTNYGADLTITEEANELIERIKSGKKMPMATSCCPGWVNYMEKHYPDLLDHLSTTKSPMQIFSAITKTHYAKQENLDPKNIFTVAIMPCIAKKYEITRPEMAHDGRPDTDAVLTTRELIKLIKYIGIDFEN…	[FeFe] Group A3	[FeFe] Group A3	Bifurcating	Labile	3	[FeFe]-centre, 3 x [4Fe4S] clusters, 1 x [2Fe2S] cluster	NADH dehydrogenase, thioredoxin	6.62401	10.3904	0.604674	0	66.7039	0	0	0	0.576106	0	0	0	0	0	0.677647	0	0	0	0	0	0	16.3295	2.69545	131.1	0	0	0	0	0	0	0	0	0	0	0	0	0.608504	0	0	0	0
WP_027889016.1	MAHIVVDPVTRIEGHLRVEIEVQGNQVTDAISSGTAWRGLEVIAKNRDPRDLWAYIQRICGVCTSSHSLACVRAVEDALGIKIPKNANYIRNIMAATLTVHDHLVHFYHLHALDWVSPIEALKADPTATANLQNTVLANYKLPFAGPMDYDFSAYPKEFPKATPAYFQAVKDKVQALVSGGQLGIFAANWWDHPDYQILPPEVHLMAVAHYLNMLDKQREVVIPHVVFGGKNPHPHYVVGGMPCAISMDEMNAPINSQRLAAVDTAIRLGMDLVNNFYLPDLLAIGHICAQKGAGLDGGGLAKDRVLGFGAFPEEPFNGVANGNGEWFSQIMIRCNAVVENFGAGVMNAKVTDITSDDLKDPEVLTETTTHSWYKDGDALHPWDGKSEAEYTGDKNGNK…	[NiFe] Group 1d	[NiFe] Group 1d	Aerobic Uptake	Tolerant	3	[NiFe]-centre, 1 x [4Fe3S] cluster, 1 x [3Fe4S] cluster, 1 x [4Fe4S] cluster	Cytochrome b	7.12719	14.1588	0	0	77.5626	0	0	0	0	0	0	0	0	0	0	0	0	0	0	0	0	22.6642	0	160.233	0	0.675704	0	0	0	0	0.601135	0	0	0	0	0	0	0.988435	0	0	0
WP_021900186.1	MTRSVIDPITRIEGHLRVEMEVENGVVTDAWMSGGCFRGMELVVQDRTPEDAAHIVQRICGVCPVSHAHASSIAAEKAYGIEIPNNARIIRNLIEGGQFLHSHILWFYTLAALDYVNPLNALKANIADAYDLVEEAGTSCQSDLKALAQRLTKFAENGQMSIFSGNWWKNGAKDTEFKLPAELDLICTAHYIEALTMQSKASEICGLLGGKMPHVMTLVPGGTSFVPTEEKLDDLWSLVHEVRDWVAATMIPDTKAIAPYYLPALEFGKGCGRYVAWGVFERPSFEMADRYLPSGVIDENLNLSEVNEDLIKEYVGHSWYVGDSDLNPREGVTEPEFTEYYKEGTLFEENGHEFGEIAERYTWSKAPSYDGKCMEAGPFSRILAAYLRGNEFIKTTLDG…	[NiFe] Group 1a	[NiFe] Group 1i	Anaerobic Uptake	Sensitive	3	[NiFe]-centre, 3 x [4Fe4S] clusters	Cytochrome b	2.38157	0.180805	0	0	0	0	0.613694	28.6472	0	15.5282	0	0	0	0	0.677647	0	0	0	0	0	0	0	0	0	0	0	0	0	0	0	0	0	0	0	0	0	0	38.549	0.540998	0	13.768
WP_022378933.1	MFNVTVDGKAVSVKEGSTILDAAQAASVSIPTLCWMKDLNEIGSCRICVVETEGDDALSAACNTPVRDGMNINTRSPRVIAARRENMRTILEGHRSECTTCERSGTCALQRTAAELNVGELDFDPVFDFEAWDEDFPLQRDASKCIRCGRCVVECAKVQHCSVWDFKGPSAFRSITVRDGKEISEAGCALCGQCITHCPTGALTARNDIAKILDALADPDTMTVIQFAPAIRAAWGEVMGLTHEEATPGRMAAAAKSLGFDRVFDTDFAADLTIMEEGNEFIEWYTSGKKRPMFTSCCPGWVRFAKLHYPQFVEQLSTSKSPHQMLGAVVKNTLKEPMEAEGKKRMFVVSVMPCVAKKYECGVPQLSTKAGPDVDAVLTTREFNSMLRMFKVNCAELEE…	[FeFe] Group A2	[FeFe] Group A2	Evolving	Labile	2	[FeFe]-centre, 3 x [4Fe4S] clusters, 1 x [2Fe2S] cluster	NADH-dependent glutamate synthase	2.57513	1.10706	0	16.2847	24.82	0	3.06847	41.3793	0.576106	12.7879	0.913509	0	0.644611	0	2.03294	0	0	1.29292	0	0	0	0.422315	0	2.08095	0	0	0	0	1.95639	0	0	0	0	0.526666	0	0	0	11.8612	1.082	0	6.42506
WP_015904515.1	MIGTINGKKVEFSKDQTVLEVARANGHFIPTLCELADLDHTPGTCRVCLVDIKRRNDVNHRIVTSCTTPMEEGMAVLTRTPKVRQMQRLQVELLLADHNQDCASCVRHGNCELQDVAQFVGLEQTRYNYPEFYERRTRDYSSPSVVRDMSKCIRCFRCVKVCREIQGIDALVITQKGLETEISVRDHLPLNESDCISCGQCILVCPVGALAGRNNIEDAMDLIYNPELITVVQFAPAVRTAMGEEFNMAKGENVEAKMITALKRLGVDVVLDTNFAADLVIMEEGSELLHRLKNKGTLPMFTSCCPGWVNFVEKNYPEMTPNISTTSSPQQCLGAMAKTYLAEKMDLDPDRIRVISIMPCTAKKGEAQRPEFQRNGRPDVDVVLTTREFSRLLKREGLD…	[FeFe] Group A2	[FeFe] Group A2	Evolving	Labile	2	[FeFe]-centre, 3 x [4Fe4S] clusters, 1 x [2Fe2S] cluster	NADH-dependent glutamate synthase	1.13559	0.192784	0.604674	0	7.75626	0.573215	1.84108	7.95755	3.45663	3.65368	0	0	0	0	2.71059	0	0	0	0	0	0	0	2.69545	0	0	4.05422	0.967684	0	0.978197	0	0.400756	6.44305	0	0	0	0	0	1.97687	0	2.45405	0
WP_022363273.1	MTRSIIDPITRIEGHLRVEMEVDNGVVTDAWVSGGCFRGMELVVQDRTPEDAAQIVQRICGVCPVSHTHASSLAGEAAYGIVIPNQARIIRNLVEGGQFLHSHILWLYTLAALDYVNPLNALNANVGKAYDLMEAAGTSCSTDLKTLMGTLTKFANNGQLSIFSGGWFLDGQAPEAYKLDPEADLICTAHYLEALNMQAKASEICGLIGGKMPHIMTLVPGGTAFVPTEEKLDELYSITREIRDWVDSTMLPDTKIIASAYPEALGFGRGCGRYVAWGVFQRENFEMADRYMPSGVVYTNDGLRLEDPDPAAIKEYVGHSWYVGDSNLNPKEGVTDPLYTEYYVAGTEHEENGHMIGTVNDRYTWSKGPSYNGECMEAGPFSRVLAAYLRGGEKNRYIV…	[NiFe] Group 1a	[NiFe] Group 1i	Anaerobic Uptake	Sensitive	3	[NiFe]-centre, 3 x [4Fe4S] clusters	Cytochrome b	10.7422	2.67441	0	0	10.8588	106.045	13.5013	6.36604	0.576106	0	7.30807	13.2867	0	0	0.677647	0	19.1639	11.6363	0	0	1.73526	3.94161	0	0	4.64131	10.1356	0	5.34656	8.80377	40.997	0	33.5039	2.30441	0	0	9.32444	0	29.653	12.443	0	68.84
WP_022379545.1	MGKAQVIPFGPQHPVLPEPVHLDLVVQDETVVDVLPQIGFIHRGLEKLVETRDIHQYIYVAERICGICAFGHSYGYAQAVETLMGAEVPKRAEYLRTIMHELSRIHSHLLWMGLAADAFGYESLFMHTWRLRERILDIFEAVAGGRVILSYTLLGGVTKDIDAPMLASIKDTLKGLGKEYGEICNAFLKDSSVKNRTVGIGVIDEEHAYEYGMVGPFARASNVNNDVRCLGIGGYGELSSFEPIMETAGDCYARVKVRALEVLQSIEIINELIDKIPDGPVHIPVKGAPADGSEACNILEQPRGEVFYYCSGNGTKNLERMRIRTPTSQNLAGMTMALKGCEIADVNMIVLSIDPCISCTER	[NiFe] Group 4e	[NiFe] Group 4e	Evolving	Sensitive	6	[NiFe]-centre, 1 x [4Fe4S] clusters	NuoL, NuoH, NuoC, [FeS] protein	0.938784	0.0988278	0	2.71411	6.20501	0	0	20.6896	0	8.22079	0	1.89811	0	0	0	0	0	0	0	0	0	0	0	0	0	0	0	0	0	0	0	0	0	0	0	0	0	9.88435	0	0	0
WP_022363186.1	MVTLTIDDTSVTVEDGTTILDAAKAANISIPTLCYFKGLCDIGACRVCCVEVEGDERLSAACNTPATEGMVVHTRSDRAEAARKTNLELIRSRHDLDCRNCVRYGTCRLQYLLKSYGLAGPDAAPAIYPQELPRGKRAEWDPHAIIQRNASRCIQCGRCVAACKKLQGIGVWEFIGTGSRSSIGVADNRTMREAGCVACGQCITHCPVGALSERDDIARLRAAIADPEVTTVVQIAPATRTAWASSFGKQDGELGVERMCAVLKEMGVDYVFDTVFAADLTIMEEGTELLNIVKAGEIDRLPLFTSCCPGWVNFARTRYPESVAQHLSSAKSPMQMFGAVVKTWFAEKNGLAPEKIFSVALMPCTAKKVEVALPGMSSNPGAPDMDASLTTREFARMIA…	[FeFe] Group A2	[FeFe] Group A2	Evolving	Labile	2	[FeFe]-centre, 3 x [4Fe4S] clusters, 1 x [2Fe2S] cluster	NADH-dependent glutamate synthase	11.5809	3.22217	0.604674	0.904703	9.30752	114.07	16.5697	3.18302	2.30442	0.913421	19.1837	1.89811	1.28922	0	4.06588	0	3.83277	8.40397	0	0	2.31368	0.84463	0	0	3.40363	10.1356	0.967684	7.12874	11.2493	32.932	0.801513	56.0546	8.06544	0	0	22.3786	0	22.734	12.443	0	71.5936
WP_022363293.1	MTRSQLNIDHVARVEGHGNVHVVIEDDVVKTVEMNIVEPARLFESMVRGQSYKDCSYISSRICGICSPSHCVTDLKAVEDAFGIEVSSRTKMLRELLVYGSYLQNHASHLFVFVVPDFVGEESVFPLAQSDPELFNQALDLKKLGNDLCTLVGGRSIHPITAVVGGFTHEISAQEYLELADRLEAAIPFAKATVDLFSSFRITEIHTASDLLAMVEDDYYPVQSSNTLELIDEHVRFDAHDFESYLEEYEVPHSGALFTRVKATGKPVFTSALSRLNASWDHLSQEAKFASAKAGLRPEEKNPMKNNLAQAIEILDALIRCAGICRELAKGEGDSKPVPFEVRAGTGVGMSEAPRGVVFHKLEFDDEGRVLHASIITPTSQNLASLEADTRHLVEVLVE…	[NiFe] Group 3b	[NiFe] Group 3b	Bidirectional	Tolerant	4	[NiFe]-centre, 3 x [4Fe4S] clusters	Diaphorase, [FeS] protein	9.19551	2.548	0	0.904703	3.10251	69.9322	11.0465	7.95755	0.576106	0.913421	13.7026	1.89811	0	0	0.677647	0	19.1639	6.46459	0	0	0.578419	0.703859	0	2.08095	3.40363	8.78415	0	2.67328	2.93459	40.997	0	33.5039	0	0	0	13.9867	0	12.8497	10.279	0	78.9365
WP_022363091.1	MAKAQVIPFGPQHPVLPEPVHLDLVVEDETVVDVLPQIGFIHRGLEKLVETRDIHQYIYVAERICGICAFGHSYGYAQTVERLMNVEIPPRAEYLRAIMHELSRIHSHLLWMGLAADAFGFESLFMHSWRLRERILDIFEAVAGGRVILSYTLIGGVTKDIDAPMLQAIKDKLASIKDEYKQICNAFLKDTSVKNRLVGVGYIAPEDAFGYGMVGPFARASNLNNDVRCLGIGAYGDLAEFKPILSTDGDCYARVQVRAEEVLQSIDIINELIDKIPGGDFYVPVKGAPAAGSEACNILEQPRGEVYYYCSGNGTKNLERMRIRTPTTQNIAGMTVALKGCDLADVNMIVLTIDPCISCTER	[NiFe] Group 4e	[NiFe] Group 4e	Evolving	Sensitive	6	[NiFe]-centre, 1 x [4Fe4S] clusters	NuoL, NuoH, NuoC, [FeS] protein	7.38054	2.24749	0	0	4.65376	64.2001	12.2739	3.18302	0.576106	0.913421	13.7026	5.69432	0.644611	0	0	0	11.4983	8.40397	0	0	1.15684	2.53389	1.34772	2.08095	2.47537	4.72993	0	1.78219	5.38008	26.8833	0	28.3494	0	0	0	7.45955	7.91055	11.8612	16.2299	1.84054	55.072
WP_021900040.1	MGKAQVIPFGPQHPVLPEPVHLDLVVQDETVVDVLPQIGFIHRGLEKLVETRDIHQYIYVAERICGICAFGHSYGYAQAVETLMGAEVPMRAEYLRTIMHELSRIHSHLLWMGLAADAFGYESLFMHTWRLRERILDIFEAVAGGRVILSYTLLGGVTKDIDAPMLASIKDTLKGIGKEYGEICNAFLKDSSVKNRTVGVGIVDEEHAYEYGMVGPFARASNVNNDVRCLGIGGYGELSSFEPILDTAGDCYARVKVRALEVLQSIDIINELIDKIPDGPVHIPVKGAPADGSEACNILEQPRGEVFYYCSGNGTKNLERMRIRTPTSQNLAGMTMALKGCEIADVNMIVLSIDPCISCTER	[NiFe] Group 4e	[NiFe] Group 4e	Evolving	Sensitive	6	[NiFe]-centre, 1 x [4Fe4S] clusters	NuoL, NuoH, NuoC, [FeS] protein	0.993626	0.149087	0	0	0	0	0	4.77453	0	9.13421	0	1.89811	0	0	0	0	0	0	0	0	0	1.12617	0	0	0	0	0	0	0	0	0	0	0	0	0	0	7.91055	12.8497	0	0	4.58933
WP_014015718.1	MKTLDELYQQMLKRAAEGKPVGVDGDPKLIDCLAHPDDHPLIWRVKPCLCPPDEPHHCQEACDWGAITSGPDGIAIDDSQCVGCQACVDACKLDTLKTRKDIIPVVQELHDYDGPIYAMVAPAVSGQFGPDITMGKLRTAFKRLGFTGMLEVAVFADILTLKEALEFDKNINSEDQFQLTSCCCPMWIAMIKKLYHQLLPNVPGSVSPMIAGGRTVKALHPKAKTVFIGPCLAKKAERKEPDLVGAVDYVLTYQELRDLFSVTNIDLASLPEDNLPHASEAGISYAYAGGVSEAVTETVHQLNPDRQVDIKTRKADGVPACKAMINDILAGNRDGNFFEGMGCMGGCVGGPRAIIKKEEGKANVQAYGKQAAYKTPMENPYVIELLKKLGFPTVEEFLE…	[FeFe] Group B	[FeFe] Group B	Evolving	Labile	1	[FeFe]-centre, 2 x [4Fe4S] clusters	None	3.65489	10.4476	0	0	0	1.14643	0	0	0.576106	0	0	0	0	0	0.677647	0	0	0	0	0	0	0	0	0	0	0.675704	0	0	0	0	0	0	109.46	0	0	0	0	0	0	0	0
WP_014079355.1	MHEEILKREHKAEKQRKEEMRYDQMDCLLLAGEEKTERTIPVCETVFPEKFADLNAVREVLLTPEKQVYALIAPAFMGQFGEGVSPGAIRAALKRAGFSGMVEVAVFADILTLKEALEFDRHVNRDTDFLLTSCCCPVWVSMIRNIYGELVPYMPGAVSPMIAAGRAVKKMHPDAVTVFIGPCLAKKKEAKEPDICDAIDVVLTFQETAMLFEAMGIAPQQMEEDASEHSSGAGRIYARTGGVSEAVVRTVEQLHPGRKIAVRPMQADGGKACKQMIEAIQEGKTEANFFEGMGCVGGCVGGPRALLPREEGSAYVDHYGKEALYQTPLENPYVIELLEKLGFSTVEDFLEKSDLLTRHF	[FeFe] Group B	[FeFe] Group B	Evolving	Labile	1	[FeFe]-centre, 2 x [4Fe4S] clusters	None	7.42356	2.55546	6.04674	5.42822	41.8838	10.8911	6.13694	0	2.30442	2.74026	0.913509	7.59242	0	0	10.1647	1.2565	0	21.9796	19.4166	1.97418	0	3.94161	18.8681	16.6476	19.4935	4.72993	0.967684	18.713	0	4.70457	2.00378	23.8393	2.30441	0	2.68962	19.5813	0	2.9653	1.082	3.06756	4.58933
WP_028086317.1	MGIMTIDGQRVEFTDEPNVLSVIRKAGIDIPTLCYHSELSIYGACRLCTVENERGKTFASCSEKPRDGMVIYTNTPRLMHYRKLILELLLAAHCRDCTTCIKSGECHLQELAHRLGVHEVRFENVREMQPIDNSSPAIIRDPNKCILCGDCVRMCDNIQNINAIDFAYRGTDALVTPAFNKKIAETNCVGCGQCRVVCPTGAISIHTNIDLVWEALADKNTKVIAQIAPAVRVAVGDQFGYAKGENVMGKLVGVLHRLGFDEVYDTSYGADLTVIEESKEFIERFTAGEKLPLFTSCCPAWVKHCETKYPELAENLSTCRSPQQMFGAVVREYYKDPEKNEGKRLVSVSIMPCTAKKEEILRPESMTNGKQDVDYVLTTTEIIRMIKKSGIVFDKVEIE…	[FeFe] Group A3	[FeFe] Group A3	Bifurcating	Labile	3	[FeFe]-centre, 3 x [4Fe4S] clusters, 1 x [2Fe2S] cluster	NADH dehydrogenase, thioredoxin	30.0254	13.9888	5.44206	4.52351	6.20501	10.3179	6.13694	4.77453	18.4354	3.65368	2.74053	0	159.219	45.1609	6.77647	0.62825	19.1639	21.3332	8.82573	100.683	4.62735	22.6642	10.7818	49.9429	7.4261	12.8384	11.6122	5.34656	4.40189	82.6661	63.9207	211.976	73.7412	3.68666	10.7585	2.79733	3.65102	157.161	10.279	6.13512	10.0965
WP_022418208.1	MLNIKIEGVPYQVEEGLTILEAAKKCGYEIPSLCSFNHGECSQGSCRVCLVEATGARGLVASCVYPVSEGMEIKISTPKATEARRTSVELLLSNHNQNCQQCDKNGKCELLHVAKLVGAREGMYAGAKTPATIDKLSPSIYRDTSKCILCGRCVARCKNAHGLGILGFEKRGFNTIVAPAENRSFANSPCILCGQCVTVCPTGALMEVSDVAKVDEAFAKGKYVVVQTAPAVRAALGEEFGDKVGTLATGKMVAALRRLGFKKVFDTNFGADLTIMEEATELLGRIKDGGVLPMITSCSPGWINYCEYNYADLIPHLSSCKSPHEMMGAILKTYYAEKTGVKPEDMFVVSIMPCTAKKYEAQREELKTNGLSDVDAVLTTRELARIIRRAGIMWNRLPE…	[FeFe] Group A3	[FeFe] Group A3	Bifurcating	Labile	4	[FeFe]-centre, 3 x [4Fe4S] clusters, 1 x [2Fe2S] cluster	NADH dehydrogenase, thioredoxin, thioredoxin	5.00877	2.55207	1.20935	0	9.30752	1.14643	2.45477	0	0.576106	1.82684	1.82702	0	4.51228	0	10.1647	0	0	1.93938	1.76515	0	1.73526	4.64547	64.6908	0	85.7096	3.37852	0.967684	1.78219	2.44549	0.672082	1.40265	2.57722	0	0	0	0.932444	0	9.88435	1.082	24.5405	0
WP_012798421.1	MTRSVIDPITRIEGHLRAEMEVTNGVVTDAWVSGGSFRGMELVVRNRRPEDAAQIVQRICGVCPVSHAHASTIAAERAYGITIPNNARIIRNMLEGAQFLHSHILWFYNLAGLDYVNPINALKAKIGDTYDLAEQLGTEGADFAGLQDRLKAFADNGQLSIFSGNWFDTGEYNLTPEADLILTAHYLEALEMQAAASRISGILGGKMPHVMTLVPGGTMFVPTAENLDDLKGLIDKIYNWVYATLLPDTLAVAQFYPEAATFGQGVGRYGAWGVFEAPSFEYNERYLPAGILEADGTLNDIDESKITEYVGHSWYEGDKDLPPFEQGVHPAYTEYNVEDRYTWNKCPRYDGKPLEAGGLSRLLVAYKRGVPFVVEYVDQVITALGGKKGDYSILQNTLG…	[NiFe] Group 1a	[NiFe] Group 1i	Anaerobic Uptake	Sensitive	3	[NiFe]-centre, 3 x [4Fe4S] clusters	Cytochrome b	0.739051	0.230512	0	0	1.55125	0	0.613694	0	3.45663	0	1.82702	1.89811	0	0	0.677647	0	0	0.646459	0	0	0.578419	0.703859	2.69545	2.08095	0.309421	4.05422	0	0	0	0	0	0	1.15221	0	0	0	0	1.97687	3.24599	0.613512	7.34293
WP_012625292.1	MSNRTTVIPFGPQHPVLPEPLHIKFVVEDETVVGAIPQLGFVHRGLESLVRTKDYNQMVFVVERICGICSCIHANCYCNALENMMGITAPPRAQFLRVIWSELHRIHSHLLWLGLFADAFGFESVFQQFWRIREHVMDICEATAGNRVILSVNVVGGVRRDLAPDQIRWMLGRLDELQKGMRELTTTMLDDYTVQERTRGIGYLSKDDARLLGAAGPTLRGSGWEIDERMHGYAAYNDLNFIPVVEHDGDCYARAKVRFYEVLHAMDLIREALNRLPESELTVKVPGNPDGEAVFRVEQPRGELFYYIRANGTKYLERMRVRTPTFANVPPLLHMLPGCKLPDVPVIVLSIDPCISCTER	[NiFe] Group 4e	[NiFe] Group 4e	Evolving	Sensitive	6	[NiFe]-centre, 1 x [4Fe4S] clusters	NuoL, NuoH, NuoC, [FeS] protein	0.547369	0.0158742	0	0	0	0	0	0	0	1.82684	0	11.3886	0	0	0	0	0	2.58584	0	0	0	0	2.69545	0	0	0	0	0	0	0	0	0	0	0	0	0	0	0	0.540998	0	0
WP_014015846.1	MSRFINNLKRRVAKEQKKIVLPESESRRVLQAAERVQAEGFARPILIGRPQSIVEVASEYQIDMDGIEIIDPETYPMMDKFCEYYAKRRAKKGMTLEEARKVLSENYIFFAACLVAFDIADGMVAGAVATSSEVIRAALQVIGPHPGLSTVSSSFIMITDKPQFGDDGIFVVGDCSVVIEPTPQQLADIAVSCVERARRTAQMLDPKVALLSYSTMGSGAGEEVDRVREAVRLLRDRNVDFEFDGEMQADAALVPRIARQKAPGSTVAGQANVLVFPNLVSGNICYKVLEHLAGATALGPLLQGLAKPVMDLSRGCTPEDITDVIAICCSDAIYMQAEKKRDIAFTSRFEKLDRRVAVENRNISIQFDPEKCKNCTLCRRRCADVMSMTGYYSLESTGD…	[FeFe] Group A1	[FeFe] Group A1	Evolving	Labile	1	[FeFe]-centre, 2 x [4Fe4S] clusters	None	9.90385	23.8396	0.604674	0	1.55125	2.29286	2.45477	0	3.45663	2.74026	7.30807	13.2867	2.57845	0	5.42117	0.62825	0	2.58584	0	0	0	1.54849	0	2.08095	0.618842	1.35141	5.8061	0.891093	6.84738	1.34416	0.801513	1.28861	267.312	0.526666	1.34481	5.59466	4.25952	5.93061	0.540998	1.22702	1.83573
WP_022370065.1	MTRSIIDPVTRIEGHLRVEMEVEGGVVTDAWVSGGCFRGMELVVENRTPEDAAHIVQRICGVCPVSHAHASAIAAEKAYGITIPNNARIIRNLIEGGQFLHSHILWFYTLAALDYVNPINALNANVGDALDLVEAAGTSCQSDLKALKEKLQTFANNGQLSIFSGGWFLDPEVAKEFTLGAELDLICTAHYIEALTMQSKASEICALLGGKMPHVMTLVPGGTSFVPTEEKLDDLWSLVREVRDWVKATMIPDTKAIAPAYKAALDFGKGCGRYIAWGVFEDPSFEMSKRYLPSGVIDENLKLSEVNEDLIKEYVGHSWYVGDSDLNPREGVTEPEYTEYYKGDTDVISDRYTWSKAPSYDGKPMEAGPFSRVLAAYLRGNKFVKTTLDGLMADLGLSL…	[NiFe] Group 1a	[NiFe] Group 1i	Anaerobic Uptake	Sensitive	3	[NiFe]-centre, 3 x [4Fe4S] clusters	Cytochrome b	2.96529	1.59961	0	0	1.55125	0	1.84108	7.95755	0	3.65368	0	43.6564	1.93383	0	0.677647	3.14125	0	0	0	0	0	16.4703	2.69545	2.08095	0	1.35141	0	0	0.978197	0	0.200378	0	0	0	0	0	50.5058	3.95374	0.540998	1.84054	3.67147
WP_022397361.1	MSNYTSADVPESSRVVIDPVTRIEGHLRVEMEAGDGVIKNAWTSTTQYRGIEVIACKRDPRDVWAFVERICGVCTGTHAIAALAAVEDALQYPVPVQARLMRDLVSGALGIQDHVIHFYQLQAMDWVDVMSALKADPKETAAIAKSLSDWPLSSATYFAGVQKKLKDSIAHGQYSIFTNGYWGHPAYKLPPEVNLLGVAHYLQALVWQRDMIKIHTILGGKNPHPNFLVGGMACAINMNNDQAINQFALSYLKQLVQTCHDFIHKVYYPDIVAIAGFYKDYAHIGASNPNFFCTGDPSEINTGAPAGKGMIKPGVLLNGDYKNVLPFDQDKIKEFVTSAWYKYTEGRDAGLAPYDGETNADYNGPRPPYKWLSDHPQYTWVKAPRYDGHAMAVGPNARM…	[NiFe] Group 1f	[NiFe] Group 1f	Anaerobic Uptake	Unknown	3	[NiFe]-centre, 2 x [4Fe4S] clusters, 1 x [3Fe4S] cluster	Cytochrome b	8.17044	2.92984	0	0	0	0	0	0	0.576106	17.355	0	0	0	0	0	0	0	0	0	0	0	20.4119	0	0	0	52.7049	0	0	0	0.672082	3.80719	63.7862	0	0	0	0	0	0	0	0	0.917866
WP_005348317.1	MVNIKINDVPISVEEGTTILEACREAKMIVPTLCYLKDINEIGACRVCVVEIKGIERLVTSCNNTVKEGMEIYTNSPKVRDARRINIKLILSQHNCFCPTCVRSGNCQLQKVANDLEFGSGTFKQHITEEKWPMDFPLIRDESKCIKCMRCIQICDKVQSLKVWDIAKTGSRTTVNVSLGRNIKEADCALCGQCITHCPVAALSGRDDKRPVFSQNGMLNTRRKTTVVQVAPAVRTAWAEAFKLSRKFASPERLAGALRLMGFDYVFDTTYAADLTIMEEGSEFLERLKHKEDYQWPMFTSCCPGWVRFLKSQYPDMVDCLSTAKSPQQMQGAIIKNYFADKIHEDPENIFSVSIMPCIAKKAECALPTMDSTGTGPDVDVVLNTREFVDYMKSLNIDV…	[FeFe] Group A2	[FeFe] Group A2	Evolving	Labile	2	[FeFe]-centre, 3 x [4Fe4S] clusters, 1 x [2Fe2S] cluster	NADH-dependent glutamate synthase	100.342	49.4525	70.7468	50.6634	116.344	114.643	134.399	76.3925	142.874	29.2295	34.7133	83.5166	662.016	90.3219	51.5011	49.6318	42.1605	80.8074	91.7876	90.8121	103.537	77.9875	18.8681	235.148	24.1348	225.009	115.154	136.337	87.0595	179.446	28.4537	91.4913	116.373	4.21333	115.653	221.922	74.8459	168.034	138.496	92.0268	145.941
WP_005351469.1	MLMNRTTPFMVPVDDANPAIIKNEALCSECGHCFAVCEEEIGVAAKYLLNQREAYQCIGCGQCSAVCPEKAITGRPHYKIVKELIQDPEKIVVFSTSPSVRVGFADGFGKEPGTFAQDEMVGALRALGADYVFDVTFSADLTIMEEGSELLSRILKGTGPLPQFTSCCPAWVKYMENFHPDKTKYLSSAKSPIGMQGAVIKTYFAHKKHIDPEKIISVAVTPCTAKKAEIAREELCDAGKLLNIEEMRDNDYVITTKELVQWCKEEGMDLGKITPSKYDSVLGEGTGAGMIFGNTGGVMEAALRTVYRVLEGKEAPADFYQLRPVRGLNNRKEAEVTIAGKNLKVCILYGTAAAEEFLAEDMSGYHFVEVMTCPGGCISGAGQPDCGSVPVSDAVRKKR…	[FeFe] Group A1	[FeFe] Group A1	Evolving	Labile	1	[FeFe]-centre, 2 x [4Fe4S] clusters	None	75.5139	37.2439	104.609	64.2339	76.0114	75.6644	154.037	71.618	122.134	44.7576	36.5404	102.498	387.411	84.3004	44.047	38.3233	19.1639	96.3224	84.727	90.8121	128.409	47.4401	8.08635	145.667	32.1798	110.14	76.447	85.5449	67.9847	93.4194	9.2174	53.4773	86.4154	1.58	79.3437	112.826	94.9266	76.1095	108.2	133.746	91.7866
WP_009145644.1	MAPQPTTYFHSVELQRNKCQGCVSCVKLCPTEAIRVRNGKAEILGDRCIDCGACAAGCPYHAFNVKTDTLEGLADYAYNIVLPAPSLYAQFPDNIPLESIWQGLHNIGFDEIFDVSLASEYIALEIEEYVKKNSNGRKPLISSTCPAVMRLIQVKFPELIKQVVPVLPPAEAAAIYVKREAAARKQLPKELIGVWFISPCPSKETNIRQSVDVHHTELTGSFSLSEIYGLLLKNLGGTHELNVRTGSSYGMAWGTYGGEIESAGITNGLAIHGIDNVYDLLEQVSMNKMPQLDYVECSACKGGCLGGLLAAENKFVAECNLRRRIAGLRKQEPADRREAMARTMVLEDFPHSEAYRKKLVARPMMQLDDDIMEAMKKFERMEEVLCSLPGLDCGACGAP…	[FeFe] Group C	[FeFe] Group C1	Sensory	Labile	2	[FeFe]-centre, 2 x [4Fe4S] clusters, PAS domain	Histidine kinase	15.1885	7.51109	0	0	35.6788	0.573215	20.2519	6.36604	44.3601	31.0563	46.5889	3.79621	27.7183	6.02146	0	5.026	26.8294	19.3938	15.8863	252.694	0	58.7018	8.08635	0	12.9957	2.02711	11.6122	2.67328	16.6293	0.672082	8.01513	1.28861	0	0	5.37923	0	0.608504	3.95374	0	0	0
WP_009380765.1	MGETFEPHEIRYTGGCINCGQCLTHCPEGAIFEEQTWIPELRRKLCDPEIKCIAMPAPSVRYALGEAFGLPTGTVTTGKMLTALKQLGFAHCWDTEFTADVTIWEEATEFVERLTHGKNLPHFTSCCPGWQKYAETFCPELLSHFSSCKSPIGMNGSLAKTYGAERMGYAPKQVYTVSIMPCIAKKYEGMRPELQLDGMREIDATLTTRELAYLIKEAGIDFRALPDGERDSLMGESSGAATIFGVTGGVMEAALRYAYEALTGEKPANWDFTSVRGLDGIKEATVTIAGKELRVAVVHGAKRFKKICDQVQAGNSPYHLIEFMACPGGCVCGGGQPVMPSWFGAMNRKTTSLFAGLKKRLTMANNA	[FeFe] Group A1	[FeFe] Group A1	Evolving	Labile	2	[FeFe]-centre, 2 x [4Fe4S] clusters	Small subunit	0.858646	0.740672	0	0	6.20501	0	0	0	0.576106	0	4.56754	3.79621	0.644611	0	0.677647	1.2565	0	3.87876	0	0	0	0.563087	1.34772	0	0	0	0	0	0.489098	0	0	0.644305	0	0	0	0	0	0	0	0	0
WP_007209903.1	MAFTNNIMIVRHRLLTELVKLWRDNELVEKIDRLPIELSPRRSKHAGRCCVHKERAVWKYKSLPLLGLDMEDEKDELTPLSEYAAHALDRAENGTPKDNIMCVIDEACSACVQINYEITNLCRGCTARSCQTNCPKKAVHVKESGQAWIDHDECISCGICHKSCPYHAIVYIPVPCEEACPVKAISKDKKGIEHIDESKCIYCGKCLNACPFGAIFEVSQVFDILHKIRKGEKIVAIVAPSILGQFKTTIEQVYGALKAVGFTDVIEVAQGAMDTVSNEAHELIEKLEEGQKFMTTSCCPSYIELVNKHIPGMKPYVSGTGSPMYYAARIAKEKHPDAKVVFIGPCVAKRKEAQRDEAVDFVMTFEEVASVLDGLNIQLEQSQPYAMSFASVREAHGFA…	[FeFe] Group B	[FeFe] Group B	Evolving	Labile	1	[FeFe]-centre, 3 x [4Fe4S] clusters, 1 x [2Fe2S] cluster	None	2.15103	1.64177	0	0	1.55125	2.29286	0	0	0	0	2.74053	5.69432	18.6937	0	0	0	0	0	0	0	0	2.95621	0	0	0	1.35141	0	0	2.44549	0	0	0	0	0	0	0	0	0	0	0	0
WP_009145651.1	MMQMVNLTIDGKQIQAPAGSSVLEAARSAGIYIPTLCYHPDLRPEGACRLCMVEASGARTLVASCVYPVSEGMVVKTNTSKVREARKTVLELLLTNHPKDCLCCQKNGDCELQKIAADLGVRKLRFEGGETRARTIDNSNPSLVRDQEKCILCGRCIRVCRDVQGMSVYSFAGRGFNTMVSTAFEHDLLNSACTYCGQCADVCPTGAIVEKDDTDKVWAAINNPEKVVVVQTAPSVRVALGEELGIPAGQVVTGKMVAALRHLGFDKVFDTNFSADLTIMEEGHEFLQRLQNGGVLPMITSCSPGWVNMIELKYPELLPHLSTAKSPQQMFGAVAKTYFAERAGIDPAKIVSVSVMPCTAKKAEAAREEMCASGYRDVDVVITTRELGRMIREAGIDFN…	[FeFe] Group A3	[FeFe] Group A3	Bifurcating	Labile	3	[FeFe]-centre, 3 x [4Fe4S] clusters, 1 x [2Fe2S] cluster	NADH dehydrogenase, thioredoxin	28.7331	15.6319	2.4187	5.42822	83.7677	9.74465	15.956	19.0981	69.1327	106.87	49.3295	9.49053	76.7088	9.03219	2.71059	16.9628	34.495	59.4743	60.015	345.481	0.578419	76.8614	12.1295	4.16191	34.3457	17.5683	27.0951	23.1684	28.8568	0.672082	23.4443	5.79875	0	2.10666	17.4825	5.59466	3.04252	16.8034	0	2.45405	3.67147
WP_009138996.1	MGKATVIPFGPQHPVLPEPLHLDLVVEDEHVIEAIPQIGFIHRGLEKLVETRDIHQFIYVAERICGICSFGHSLGYAETVEDLMGVEVPKRAQFIRVILHELSRMHSHLLWMGLAADAFGFESLFMHCWRLRERVLDIFEATTGGRVILSAVCIGGVNRDIENTELKAIVDKLNGIKDEYREITNTFLKDTSVKSRLVGIGHLTKEQAEDLCMVGPFARASNVAYDCRMLGRGAYGDLEGFEPILSDEGDCYARCKVRALEVSQSIDIIEELVSKIPDDGIGSKSKLTPPEGAQASSVLEQPRGECYYYARGNGTKNLDRMRMRTPTSQNLAGMVKALEGCDLADVPMIILTIDPCISCSER	[NiFe] Group 4e	[NiFe] Group 4e	Evolving	Sensitive	6	[NiFe]-centre, 1 x [4Fe4S] clusters	NuoL, NuoH, NuoC, [FeS] protein	1.89824	0.955784	0	0	0	13.7572	0	6.36604	0.576106	0	0	5.69432	0	0	0	6.91075	0	0	0	1.97418	0	0	4.04317	4.16191	0	15.5412	0	6.23765	0.489098	0	0	3.86583	0	0	0	0	0	0	9.19697	0	9.17866
WP_006008218.1	MSQVMKTPQSNFSGPIVVDPLTRIEGHLRIEVEVENGRIKDARSCGTLYRGLEVILKGRDPRDAQHFTQRTCGVCTYTHALASTRALEDAMGLTLPANATYIRNLVLGLLFMHDHMVHFYHLHALDFVDVTAALKADPAKAAALASSISPRKATADDFKAVQARLKAFVDSGQLGPFTNAYFLGGHPAYYLDPEANLVATAHYLEALRVQVSAAKAMAVFGAKNPHPQFLIPGGVTCYESLTPERIKEFRDLYLQARKFIEEVYIPDLLLVAGAYKDWAALGCGCRNFMAFGEFPEVGGERDITKRWLKPGVLLDGKLDTVHPFDAGKIAEHVRHSWYEGEEARAPYDGETKPAFTRMGDTDRYSWLKAPRYDGLAMETGPLAQMLVSYAQGHEAVKPA…	[NiFe] Group 1b	[NiFe] Group 1b	Anaerobic Uptake	Sensitive	3	[NiFe]-centre, 2 x [4Fe4S] clusters, 1 x [3Fe4S] cluster	Cytochrome	2.2076	3.69844	0	0	43.4351	0	0	0	0.576106	1.82684	0	3.79621	0	0	6.09882	0	0	0	0	0	0	37.1637	1.34772	0	0	0	1.93537	0	0	2.01625	0.400756	0	0	0	0	0	0	0	0	0	0
WP_009139069.1	MARSIIDPITRIEGHLRAEMEVTDGVVTDAWVSGGCFRGMELVVRDRTPEDAAFIVQRICGVCPVSHMHASSIAAEKAYGISIPNNARIIRNLIEGSQFLHSHILWFYNLAGLDYVNPLNALSADPVAAYDLATELGTPSADFVGLQDRLKKFAENGQLSIFSGNWFDTGEYNLTPEADLILTAHYLEALQMQAKASEIAGLLGGKMPHIMTIIPGGTAFVPTAEKLDDLKGLVDELYTWVANTMIPDTLAVAKFYPEATTFGKGCGRYGAWGVFERPSMEMNDRYLPAGVLDDQLNLSDVDESKITEYVGHSWYEGDADLPPFEQGVKPAFTEYNVDDRYTWNKCPRYDGKPLETGGFARLLVAYKRNVPFVVEHIDSMLVALGAQKGDLSALQNTLG…	[NiFe] Group 1a	[NiFe] Group 1i	Anaerobic Uptake	Sensitive	3	[NiFe]-centre, 3 x [4Fe4S] clusters	Cytochrome b	5.41599	2.98054	0	0	0	17.7697	11.0465	7.95755	8.64158	0	0.913509	9.49053	0	0	6.77647	13.8215	0	0.646459	0	1.97418	1.15684	0.703859	9.43407	4.16191	2.16595	43.9208	0	27.6239	2.44549	0	0.801513	3.86583	1.15221	0	0	0	0	4.94217	22.7219	0	41.304
WP_012742086.1	MRLLILSDTIRKIEILFYKEESIMRGVETRIQEIRHKIFTEVARMAYHTEWPVKDRMEALPYKIIPGEKGNFRNDVFLERAIVGERLRLAMGLPYRSAAEHSPISDGIEAADKDETYYTPPLINVIKFACNACPEKRVHVTDGCQGCLAHPCMEVCPKDAVSLDRTTGKSVIDQEKCIKCGRCASVCSYNAIIVQERPCAKACGMDAISSDENGKANIDYDKCVSCGQCLVNCPFGAIADKSQIFQTIRAIQSGEKVYAAVAPAFVGQFGPKVTPGKLRAAMKALGFADVFEVAIGADLCAKQEAEDFLKEVPDELPFMATSCCPAWSVMAKKLFPEHAKCISMALTPMTLTARLIKQHNPDARVVFIGPCAAKKLEAMRRSVRSEVDFVLTFEEMTGI…	[FeFe] Group B	[FeFe] Group B	Evolving	Labile	1	[FeFe]-centre, 2 x [4Fe4S] clusters	None	65.103	37.6649	128.796	90.4703	12.41	44.1376	11.0465	47.7453	7.48937	4.5671	21.9242	60.7394	9.02456	15.0536	28.4612	288.995	42.1605	45.8986	31.7726	183.598	110.478	18.4411	8.08635	76.9953	16.0899	56.7591	110.316	19.604	46.9534	116.942	46.6881	16.1076	56.4581	117.446	146.584	169.705	59.6333	11.8612	20.0169	4.9081	48.6469
WP_021900643.1	MYNVTIDAKAVSVEEGSNILDAAHAAGVSIPTLCWMKDLNEIGSCRICVVETEGDDALSAACNTPVRDGMNIRTNSPRVIAARRENMRTILEGHRSECTTCERTGTCALQRTAAELNVGELDFDPVFDFEPWDEDFPLQRDESKCIRCGRCVAECAKVQHCNVWDFKGPSAFRGITVRDNKDITEAGCALCGQCITHCPTGALTARNDIPKVLDALADPETMTVIQFAPAIRSAWGEVMGLTHEEATPGRMAAAAKSLGFDRVFDTDFAADLTIMEEGNEFIEWYTSGKKRPMFTSCCPGWVRFAKLHYPQFVEQLSTSKSPHQMMGAVVKNTLKEPMEAAGKRNMFVASVMPCVAKKYECGVPQLSTEAGPDVDAVLTTREFNNMLRMFNVNCAALEE…	[FeFe] Group A2	[FeFe] Group A2	Evolving	Labile	2	[FeFe]-centre, 3 x [4Fe4S] clusters, 1 x [2Fe2S] cluster	NADH-dependent glutamate synthase	4.92596	0.873648	1.20935	3.61881	0	0.573215	1.84108	47.7453	1.72832	13.7013	0	0	0	0	0	0	0	0	0	0	1.15684	0.563087	4.04317	0	0	0.675704	0	0	0	0	0.200378	0	2.30441	0	0	0	0	98.8435	1.62299	2.45405	10.0965
WP_012421152.1	MSNYTSADVPESSRVVIDPVTRIEGHLRVEMEAGDGVIKNAWTSTTQYRGIEVIACKRDPRDVWAFVERICGVCTGTHAIAALAAVEDALQYPVPVQARLMRDLVSGALGIQDHVIHFYQLQAMDWVDVMSALKADPAETAAIAKSLSDWPLSSAAYFAGVQKKLKDSIAYGQYSIFTNGYWGHPAYKLPPEVNLLGVAHYLQALVWQRDMIKIHTILGGKNPHPNFLVGGMACAINMNNDQAINQFSLSYLKQLVQTCHDFIHKVYYPDIVAIAGFYKDYAHIGASNPNFFCTGAPSEINTGAPAGKGMIKPGVLLNGDYRNVLPFDQDKIREFVTSSWYRYTEGRDAGLAPYDGETNADYNGPRPPYKWLSDHPQYTWVKAPRYDGHAMAVGPNARM…	[NiFe] Group 1f	[NiFe] Group 1f	Anaerobic Uptake	Unknown	3	[NiFe]-centre, 2 x [4Fe4S] clusters, 1 x [3Fe4S] cluster	Cytochrome b	37.193	22.6766	0	0	0	0	47.2544	0	168.799	70.3334	0	132.867	0	0	0	0	0	93.0901	293.014	0	0	9.00939	43.1272	0	0	68.9218	0	0	78.2557	0.672082	0.400756	0	3.45662	0	151.963	0	0	54.3639	2.70499	120.248	0.917866
WP_015539897.1	MTRSVIDPITRIEGHLRVEMEVTNGKVSDAWVSGGCFRGMEMVVENRTPEDAAQIVQRICGVCPVSHAHSSAIAAEKAYGIKISNNARIIRNLLEGAQFLHSHILWFYNLAALDYVNPLNALKADAADAYDLAQAAGTSTNSDFVALKERLSNFADNGQLSIFSGNWFDAEDGTGYKLPPELDLICTAHYLEALQMQAKASQVSAIIGGKMPHVMTLIPGGTAFVPTDQKLDDLKYLVDEIYDWVEATMIPDTLAIAPYYIDALNWGKGCGRYVAWGVFENESMELKDRYLPMGVIDDKLNLSDVKEELITEYMGHSWYKGEETYTSPYFVTEPEFTSYDVNDRYTWVKCPAYDGKPYEAGGLSRVLAAYKRNVPFIVEQVDGLLEALGAPGQIGVAQS…	[NiFe] Group 1a	[NiFe] Group 1i	Anaerobic Uptake	Sensitive	3	[NiFe]-centre, 3 x [4Fe4S] clusters	Cytochrome b	7.25061	4.15211	10.8841	1.80941	1.55125	16.6232	10.4328	12.7321	8.64158	0.913421	0.913509	1.89811	21.9168	0	4.06588	0	7.66555	5.17167	8.82573	1.97418	6.94103	13.0918	12.1295	16.6476	2.78479	3.37852	1.93537	16.0397	3.42369	4.70457	3.00567	5.79875	6.91323	3.15999	6.72404	0.932444	6.69354	14.8265	6.49198	7.36215	27.536
WP_004052440.1	MYNDENVIKIKHDVLYEVAKLAFDGTLEEKRDEIPEKLIPGPQPQFRCCIYKEREIIRQRVRLAEGKNLRGQGDNVIQVISSACEGCPISSYTVTDNCQNCLGKACMNACKFGAITMGRDRSYIDPSKCKECGQCAKACPYNAIVGVKRPCKVACPVDAITYDEYNVSVIDKEKCIRCGQCIHNCPFGAIGSQTFMIDVIEALKSGKKVYAMIAPASEGQFGADITMQSWKNALKKLGFEDTIEVGLGGDMTAASEADEWAEAYKEGKKMTTSCCPAFVNMVYRHYPELKDHVSTTVSPMCGVSRMIKAKDPDAYTVFVGPCIAKKSEVKDQKIEGNADAVLTYSEIRTIMKVKGIALEPAENEYQESSIFGKRFGNSGGVTEAVLQCLKETNQEMNAK…	[FeFe] Group B	[FeFe] Group B	Evolving	Labile	1	[FeFe]-centre, 3 x [4Fe4S] clusters, 1 x [2Fe2S] cluster	None	15.5534	9.41333	24.7916	9.04703	6.20501	8.02501	4.29586	17.5066	5.76106	0.913421	10.9621	3.79621	19.983	21.0751	27.1059	38.9515	7.66555	5.81813	8.82573	33.561	17.3526	19.0042	1.34772	14.5667	2.78479	8.10845	25.1598	9.80202	11.7384	24.195	13.4253	2.57722	10.3699	25.8066	32.2754	38.2302	17.6466	6.91904	4.86898	7.36215	14.6859
WP_028026344.1	MGKATVIPFGPQHPVLPEPLHLDLVVQDETVVDVLPQIGFVHRGLEKLVETRDYNQFIYIAERICGICATGHSVGYAETVEELMGVEVPKRAEYLRVIWHELSRVHSHLLWLGLAADAFGFESMFMHCWRLRERVLDIFEKTTGGRVILSVVKVGGVVRDIDATQMAEIIATLEGIKDDYTKIMNTLLTDTSVKNRTVGVGYLSAEDAAALSMVGPFARASNLPYDVRSFGRGAYGDLVDFQPIVATEGDCYARVKVRCLEVLQSFDIIKELAAKMPAGPIEVAVKGTPAEGAEASNVLEQPRGECYYYARGNGTKNLERMRIRTPTSQNLAGMTVALKGCDLADVNMIILTIDPCISCTER	[NiFe] Group 4e	[NiFe] Group 4e	Evolving	Sensitive	6	[NiFe]-centre, 1 x [4Fe4S] clusters	NuoL, NuoH, NuoC, [FeS] protein	0.609972	0.209389	0	0	0	0	0.613694	0	1.15221	0	1.82702	1.89811	0	0	0.677647	0	0	0	0	0	0	1.26695	4.04317	2.08095	0	2.02711	0	0	1.95639	0	0	0	0	0	0	0	0	4.94217	1.082	0	5.5072
WP_027183226.1	MPESKAKDSVATPAYLSNLTPPQKGERVEMEGVYYKIAAPKDVDPASIYFVQVDKDKCVGCGECTSHCPTGAIQEMHADGQRGIVDSAVCVNCGQCLENCPFGAISEEVSFVGELFEKLRDPNTVVVSMPAPAVRYGLGECFGMDTGTYVGGKMHAALRRLGFGLIWDNEYTADVTIMEEGTELLERVKHGKKPLPQFTSCCPGWVKFAETFYPDLNGHLSTCKSPIGMLGPLAKTYGAEQAKIDGKNIYTVSIMPCIAKKFEGLRPEMNASGYRDIDATINTRELAWMIKKAGIDFVSLPEEDPDPVLGLSTGAATIFGTSGGVMEAALRLAYEVLSGDTLTNPDIKVVRAHEGIKTADIPVPNFGTVKVAVASGLQNAAKLCDEVRAGKSPYHFIEV…	[FeFe] Group A1	[FeFe] Group A1	Evolving	Labile	2	[FeFe]-centre, 2 x [4Fe4S] clusters	Small subunit	0.42375	0.114481	0	2.71411	0	0.573215	0	0	0	0	0	0	0	0	0	0	0	0.646459	0	0	1.73526	0.985402	1.34772	0	0	0.675704	3.87074	1.78219	0	0	0.200378	1.28861	0	0	0	0	0	0	0	0.613512	0
WP_012803243.1	MARTVIDPITRIEGHLRVEMEVNDGMVTDAWVSGGCFRGMELVVRDRTPEDAAMIVQRICGVCPVSHAHSASIAGEKAYGITISNNARIIRNLVEAAQFMHSNILWFYNLAALDYVNPLNALTANVADAYDLAQAAGTSTMSDLGAVKKKLQTFAANKQLSIFSGNWFDAENNDGYQLTPELDLICTAHYLEALRMQAKASEIAGLLGGKMPHIMTSTVGGTMFVPTEEKLDDLWALVNELYDWVEATMLPDTLAIAPYYADAFEFGRGCGRYIAWGVFDDTSFDMTKRYLPAGVLNDGFALEEVNEDAISEYVGHSWYEGSSDLNPREGETKAEFTSYDVADRYSWVKAPTYNGKAMEATSMSRMLVAYKRGVPFIVEHVDALLEALGAPGRIDIVPS…	[NiFe] Group 1a	[NiFe] Group 1i	Anaerobic Uptake	Sensitive	3	[NiFe]-centre, 3 x [4Fe4S] clusters	Cytochrome b	0.584845	0.295556	0	0	0	0.573215	0.613694	0	2.88053	0	0	1.89811	0	0	1.35529	0	0	0	0	0	0	1.40772	0	0	0.309421	1.35141	0	0	1.4673	0	0.200378	0	2.30441	0	0	0	0	3.95374	1.082	0.613512	3.67147
WP_016308610.1	MASTSITVEHMARVEGHGDIRLVIEGGQVTTCEMAVVEPARLFESMVRRRSYEEVPYIASRVCGICSSSHVVTDLRAIEAVFGVEVSDRTEALRELLVYGSFLQNHATHLFVFAAPDFLGHKSVFPLADVNPELLQKALGLKALGNELCTLVGGRSIHPITAVVGGFTHEIEPAEYLRLADAMDRARPFALECVDLFRDFDTLDVQTEGDLLAMVAPGAYPVCTSDTARFVRAGYDFAVDAVEEEIEEYPQHSSAAFLARARRTGRPYLTAALARVNASWDALCKDARYAAAKAGLRPPEYNPFANNIAQAVELVDVLDRCAALCRRLAADDFAGPSAPVPFTVCAGRGVGFTEAPRGALFHILDLDGEGRVERASILTPTAQNIANLEADMAQLAEKM…	[NiFe] Group 3b	[NiFe] Group 3b	Bidirectional	Tolerant	4	[NiFe]-centre, 3 x [4Fe4S] clusters	Diaphorase, [FeS] protein	1.53388	0.747548	2.4187	5.42822	0	1.71964	1.84108	0	0	0	0	0	0.644611	0	0	0	0	0.646459	10.5909	0	6.94103	1.68926	2.69545	2.08095	0.309421	4.72993	2.90305	2.67328	0.978197	0	1.20227	0.644305	1.15221	0	0	0.932444	0	3.95374	1.082	0	2.7536
WP_013979629.1	MTKTAIQVDHIARVEGHGNVHVVIEDGVVKTVEMNVVEPARLFESMVRGRRFEEIPYIASRICGICSASHVVTDLRAIERVFGVEVTPRTRALRELLVYGSYLQNHASHLFVFAVPDFVGHKSVFPLADENPELFQQALGLKALGNELCTRVGGRSIHPITAVVGGFTHELEAADYLELANKMDAAMEFALQTVDLFSGFAVPDIASQGDMLAMVEPNYYPVECSNIARFLKAGIEFDANEVGDNLEEYTVAHSAALLCRVRSTGDPFFTGALARVNASWEHLGQKAKIAAAKAGLRPPEYNPFMNNVAQAVELVDALDRCAGLCRALAEPGAIEGSSEPVAFEVRAGRGVGFTEAPRGALFHDLELDDEGRVVHASIMTPTAQNVANLEADMRLLAEK…	[NiFe] Group 3b	[NiFe] Group 3b	Bidirectional	Tolerant	4	[NiFe]-centre, 3 x [4Fe4S] clusters	Diaphorase, [FeS] protein	4.93932	2.87371	4.23272	0.904703	0	6.87858	15.956	4.77453	6.33716	3.65368	1.82702	1.89811	11.603	0	0.677647	0	0	1.93938	3.53029	0	2.31368	9.71325	5.3909	10.4048	2.16595	4.05422	0	9.80202	3.91279	1.34416	0.601135	8.37597	8.06544	2.10666	1.34481	1.86489	1.82551	21.7456	8.11497	3.06756	25.7003
WP_028027114.1	MSATRISVDHVARVEGHGDIRVVIEDGAVTTCEMAVVEPARLFESMVLGRSFGEVPYIASRVCGICSASHVVTDLRAIERVFGVGVTDRTEALRELLVYGSYLQNHATHLFVFAAPDFLGHKSVFPLADANPELLERALGLKALGNELCTLVGGRSIHPITAVVGGFTHEIDAGEYRRLAEAMDAARDFALASVDLFRDFDTLDIQTEGDLLAMVAPGAYPVCTSDTARFVEGGYEFSAQAVEEEIEEYAVGHSGAFLARARRTGRPYMTAALARVNASWDALCKDARYVAAKAGLRPPERNPFANNIAQAVELVDVLDRCAALCRRLAADEFSGASAPVPFTVRAGRGVGFTEAPRGALFHLLELNGEGRVTRASIMTPTAQNIANLEADMRQLAEKM…	[NiFe] Group 3b	[NiFe] Group 3b	Bidirectional	Tolerant	4	[NiFe]-centre, 3 x [4Fe4S] clusters	Diaphorase, [FeS] protein	1.44602	0.777389	1.20935	0	0	1.14643	6.13694	3.18302	0.576106	0	0.913509	0	5.8015	0	0.677647	0	0	0.646459	1.76515	1.97418	0.578419	4.50469	2.69545	2.08095	0.309421	1.35141	0	0	0.489098	0	0	0.644305	3.45662	0	2.68962	1.86489	0	0	4.86898	3.68107	9.17866
WP_022369673.1	MVNITINGVSLSVPENSTVLQAAKNAGIEIPTLCFLKEYNEIGACRICLVEIKGYDRLAPACNTTVEEGMVINTRSARVIEARRINLQLLMAQHDQNCLSCVRSENCKLQQLCNDENITTQPFEKDFEPFEWNTNWTLIRDASKCVKCMRCVSICDQVQANHAWTIKGTGKRTTVAPSFNTEGAPDMRCALCGQCITHCPTGALTARDDCDKVFDAIADESKTVVVQIAPSVRTAWGSAFGLTPEESDIDLLAAALKQAGVDYVFSTDFSADLTIMEEGSEFLELFTSGKTTEAPLFTSCCPGWVRYVNSHFPQTARHLSTAKSPQQMLGALIKSYFAEQQGIDPETIYSVSIMPCVAKKSECAREDFTDACGDPDVDVVLTTREVGRLLKRKNIDVAN…	[FeFe] Group A2	[FeFe] Group A2	Evolving	Labile	2	[FeFe]-centre, 3 x [4Fe4S] clusters, 1 x [2Fe2S] cluster	NADH-dependent glutamate synthase	2.46852	1.46452	0.604674	0	3.10251	0	0.613694	0	0.576106	0	0	32.2678	0	0	1.35529	2.513	0	0	0	0	0	22.805	0	0	0.309421	0	0	0	0	0	0.200378	0	0	0	0	0	59.0248	0.988435	0.540998	0	0
WP_007046798.1	MRGIYTPVTNIRRKVFTEVARMAYEVNEMSDYANLMRELPYKIIPGEEGSLRSSIFLERAIISERIRLAMGLSLRPLDESVPASEGLEHSVIADKYYEPPLINVIKFACNRCPEKIIKVTAMCQGCLAHPCQEVCPKHAISFRNGKSHIDQSLCVKCGRCVNSCPYSAIVKTERPCAAACGMGAIHSDQYGRADIDYDKCVSCGMCLVNCPFGAIVDKGQIFQLVQSIKRGDKVIAIVAPAFINQFPGMTPSKLKEGMRMLGFCDVEEVAIGADLCTIDEAKDFMEEVPSKHPFMGTSCCPAWSVMAKKLFPEYADCISMTMTPMVLTARLIKKDHPDARICFVGPCSAKKLEASRRSVRSEVDFVLTFEELMGLFEAKEVDFASLPNSPEDAFESASA…	[FeFe] Group B	[FeFe] Group B	Evolving	Labile	1	[FeFe]-centre, 2 x [4Fe4S] clusters	None	110.975	69.9635	255.172	48.854	62.0501	165.086	130.103	130.504	108.308	62.1126	387.328	79.7204	48.9905	198.708	92.8376	15.078	61.3244	167.433	67.0755	5.92253	50.3224	80.3807	67.3862	83.2381	21.9689	133.789	145.153	80.1984	199.552	97.4519	50.0946	96.0015	215.462	130.086	43.0339	198.61	181.943	259.958	186.103	50.308	142.269
WP_015720177.1	MSIAQITIDGKTITMPAGSTILEAAKKLHVDIPTLCYLNLEHLKVNNQLATCRVCVVEVEGRRNLAPACATPIVDKMVVKTNTIRVMNARKTVMELFLSDHPKDCLVCQKSGECELQDLSTKFGLRGSPYDGGAMSTYRKDFSESIIRDMDKCVMCRRCETMCNDVQTCNVLSGVNRGFNAVVAPAFEMNLADSGCTNCGQCVAVCPVGALAEKDHTWSVIEALADPDKVVVVQTAPAVRAALGEDLGMEAGTLVTGKMVSALRSLGFDYVFDTDFAADLTIMEEGSEFLDRLTRFLAGDQSVKLPIMTSCCPAWVKFFEHQFPDLLDVPSTAKSPQQMFGAIAKTYFAEKLGIPREKMVVVSIMPCLAKKYEAARPEFSVDGNRDVDVVLSTRELARL…	[FeFe] Group A3	[FeFe] Group A3	Bifurcating	Labile	4	[FeFe]-centre, 3 x [4Fe4S] clusters, 1 x [2Fe2S] cluster	NADH dehydrogenase, thioredoxin, thioredoxin	0.73459	0.256106	0	0	1.55125	1.14643	1.22739	1.59151	0.576106	3.65368	1.82702	0	1.28922	0	0.677647	0	0	0	0	3.94835	0	0.140772	6.73862	0	0	0	0.967684	0	0.489098	0	0.200378	0.644305	0	0	0	0	0	0.988435	0	2.45405	0
WP_016308995.1	MTRSVIDPITRIEGHLRVEMEVENGVVADAWVSGGCFRGMELVVQNRTPEDAAQIVERICGVCPVSHAHASSIAGDKAYGITISNNARIIRNLLEGAQFLHSHILWLYNLAALDYVNPLNALQANVDNAYAVALENGLALHSDLNQLYDKLGAFAANGQLSIFSGNWFDADNGEAYKLTPELDLILTSHYLEALKMQARASEMAALLGGKMPHVMTSIPGGNMWVPTESKLDDLLAMAIEVRDWVNDTVLADTVALAGPYAEALTFGKGCGRYIAWGVFEGNGWPYGDNYIEQMKNRYLPMGVLDENFGVTDVEESKIQEYMGHSWYKGDDTYTSPYFTTDPDYTDYNVDDRYTWVKCPTYDGKPMEAGSMSRIFAAYVRGVPFIKENVDAVLGILGAQ…	[NiFe] Group 1a	[NiFe] Group 1i	Anaerobic Uptake	Sensitive	3	[NiFe]-centre, 3 x [4Fe4S] clusters	Cytochrome b	0.798966	0.339505	0	0	1.55125	0	1.84108	0	2.88053	0	0	0	3.22306	0	0	0	0	0	0	0	0	1.26695	1.34772	6.24286	0	0.675704	0	0	1.95639	0.672082	0	0	2.30441	0	0	0	0	0.988435	1.082	0	3.67147
WP_021718870.1	MKVKPEGLRGAANICSRGGRHPLTAMFGADETSFGGGYAVYCLFENKEKHDIDILKAEFDAGSDLHYPALTPVLPAAAWYERELHDMFGFIPDDHPDLRPLVLHETYPEDFHPLRKCVDIDADVRGERKYEMAVSHGDGLFEVPVGPIHAGIIEPGHFRFSQAGEAILQLDAKLFFTHRGIEKAVEGKTPEEALLIVERICGACSVANTLSYCQALEKLSGQNVPRRAWLIRTIAAELERLYNHIGDIGNMCAGVGFAPVISMGSRLKEILLRCNEAIAGNRFLRGLIVPGGVKYDLTESLCTELTVTLNKVENEYNDIVQIIAEQDGFLNRAKTTGIISKNVALDLALVGVGARASGVDCDCRRDLPYGLYAELPFNVITKTDGDVYARLQVRMGEVA…	[NiFe] Group 4f	[NiFe] Group 4f	Evolving	Sensitive	6	[NiFe]-centre, 1 x [4Fe4S] clusters	NuoL, NuoH, two antiporter subunits	23.0515	18.2214	0	0	133.408	0	2.45477	30.2387	11.5221	124.225	7.30807	13.2867	130.856	0	0	27.0148	53.6588	71.1105	98.8482	55.2769	0	8.02399	1.34772	0	50.745	24.3253	41.6104	19.604	1.95639	0	32.4613	0	0	0	0	0	0	0	0	0	0
WP_014559402.1	MNHAIVTTITDRCKRCYSCIRECPAAAIRVVDGQAKVIEERCISCGHCVKVCSQDAKQIFSEIDIVFDLLRTNKVVAIVAPSFAASFPENYKRVPTALRKLGFTQVVETAFGADLIANHYSEILKSEADKTIISSACPAVVSFIQKYYVELVPNLAKVVSPMIALGRYLKQELGDEIKIVFIGPCVAKKHEAVDDEVYGVIDAVLTFHELKEMFDEKQIEINSLEESEFDPPHAMMGKAYPLAGGLLKTTDINDDVLEKDIIVVEGKKKVLEIIEEIAHNNINAKFTDILFCEGCISGPAIDTTLNYYSRREKVIDYIQEKINNVDRRVWKSNLYNARKLNLIRNFKADNQRRPMPDEEKIREILAQTKKFTPKDELNCGACGYETCREYAIAIAKGLA…	[FeFe] Group C	[FeFe] Group C3	Sensory	Labile	1	[FeFe]-centre, 2 x [4Fe4S] clusters, PAS domain	Fusion with histidine kinase	2.03053	1.25776	0	1.80941	0	1.71964	6.13694	0	0.576106	0.913421	1.82702	0	1.28922	0	1.35529	0.62825	3.83277	0.646459	3.53029	1.97418	1.15684	0.985402	0	0	0	1.35141	0.967684	1.78219	3.42369	0.672082	0.200378	0.644305	2.30441	8.42665	1.34481	6.5271	9.73606	0.988435	5.40998	3.06756	0.917866
WP_012282699.1	MSNGSVNGRKYETTIQMIRHEVFYQVAKMAMEGSLQAHREFIPVIVFQGNKARFRCCVYKERAVAAERVRLACGEAPQSGVAYEAAESGIPDPLVRVIAIACDECPVDRFTVTGACRGCITHRCIEACPVDAIAQINRLAYINQQKCIECGRCHQVCPYGAITDMQRPCIKACPVKAIQYGEDKIARIDPNKCVSCGHCAVSCPFGAISDLSYIPQAVEMLKTQDGTVHAVLAPSVASQFPGISIGQVHHALKKLGFAAVHEAALGADMIVDHEAKELAEKLKEGSFLTNSCCPAFVSLIEKHFPTLKGNISTSVSPMVAVGRYVKKLHPEAKTVFIGPCYAKKVEIGLPKCKGHIDLALTFEEIFAMFDAAGISLADCPDEPLQQASPFGRRFARCGG…	[FeFe] Group B	[FeFe] Group B	Evolving	Labile	1	[FeFe]-centre, 3 x [4Fe4S] clusters, 1 x [2Fe2S] cluster	None	1.31013	0.680499	0.604674	0	3.10251	0	0	0	0	0	3.65404	5.69432	0	0	1.35529	2.513	0	1.29292	3.53029	3.94835	2.31368	0.281543	0	0	0.309421	0.675704	0.967684	0	0	4.03249	0	0	0	1.58	4.03442	2.79733	0	0.988435	0	0	0
WP_013978878.1	MVNVTINGCAVEAREGMSLLSACEEAGFDVPTLCFMKNVNCIGSCRVCLVEVEGQGMCAACNTSVQEGMVVRTNTLAVTAARRANLTAIMSEHRTLCATCVRQETCALRKLASQFSLADARRELPPKGTWDEEFPLQRDSSKCIKCMRCVAECAKVQQCAVWGFTGAGSNLRVVVEGGSSIAESGCALCGQCITHCPTAALTARDDIDLVVDALADQEVVTVVQVAPAVRAAWGEGVGLASEEATPARMAAALRRLGFDKVFDTDFAADLTIMEEANEFIEWVQKDKPRPMFTSCCPGWVRFAKLHYPDFVSQLSSSKSPHQMMGAVVKNSMREEIEAAGKRMFVVSIMPCVAKKYECAVPQLSTEVGPDVDAVLTVRELDRMLRLAGVDCTALPEEPF…	[FeFe] Group A2	[FeFe] Group A2	Evolving	Labile	2	[FeFe]-centre, 3 x [4Fe4S] clusters, 1 x [2Fe2S] cluster	NADH-dependent glutamate synthase	1.55587	0.916904	0	0	0	1.14643	4.29586	0	4.03274	0.913421	0.913509	1.89811	1.28922	3.01073	2.71059	0	0	3.87876	0	0	1.15684	0.140772	6.73862	2.08095	0.309421	0.675704	0.967684	0	0.978197	0	0.801513	1.28861	2.30441	0	0	0	0	8.89591	2.70499	0.613512	10.0965
WP_005038259.1	MTAEKTLTIDGLPVAIQDEKNILEMIRRAHIELPTFCYHSELSVYGACRLCMVEVEGRGLVAACSTAPEPGMKLRTQTPQVRELRKMNIELLLASGNHDCPTCSKSGSCKLQSLAERLGVTKVRFHAPVPERPLDTSSPSILRDPSKCILCGDCVRFCDEIQGIGAIGFTHRGSQSMVAPAFNKGIAEVDCVNCGQCAAICPVGAITVKSDIEKVFDVLGDPSKTVIVQVAPAVRSAMAEAFGLPNDTFTTMGRIVTALRRLGFKKVYDTSFTADLTIWEEATEFINRKQKGGKLPLFTSCCPAWVKLAEHDLPEILDNISSCRSPQAMFGSLAKEILPGELGIQREDLVVVSVMPCTAKKFEATRPEFAVDGNPDTDLVITTQELARMIQDAGLLFGE…	[FeFe] Group A3	[FeFe] Group A3	Bifurcating	Labile	3	[FeFe]-centre, 3 x [4Fe4S] clusters, 2 x [2Fe2S] cluster	NADH dehydrogenase, thioredoxin	0.703735	0.329497	0.604674	0	1.55125	0	0.613694	1.59151	0	0.913421	0.913509	0	0	0	1.35529	0	0	1.29292	0	0	1.15684	1.40772	2.69545	2.08095	1.23768	0	1.93537	0.891093	0	0.672082	0.801513	0.644305	0	0.526666	0	1.86489	0.608504	2.9653	0	3.06756	0
WP_006524079.1	MIVTNEARCRDCYRCLRACPVKAIRISASEETGALYARVIDELCVKDARCVLICPQKAKKVTSSLAEVRHSIKNGNFMVASVAPSFVVGLPLADPGHMPALLRRLGFKKVQETSLGAALVARQHGRMGFDKALISSACPVVVNLVERHYPEALPYLAPIVSPMIAHGRYLKESYPGCKTVFIGPCAAKKDEALVNGISDAIDYVLGFDELWEWVQEENIDCSGLAADEFDGPKPGLARLFPIDGGMLKTVGVSKQADERFTTVSGLQNCIDFIKHLASGGIILPGLVELLACPGGCINGPQMMGRDEGLFNRRRKVIEYQKSQCRSEGDDVATITDINEKLLQRSFVNRQVVFPVPSEAEIKEILERSGKFKPEDELNCGACGFDTCRDKAIAVYQGNA…	[FeFe] Group C	[FeFe] Group C3	Sensory	Labile	2	[FeFe]-centre, 2 x [4Fe4S] clusters, PAS domain	Phosphatase	0.540152	0.200019	0	0	0	1.71964	0	0	0	0	0	0	0.644611	0	0	0.62825	0	0	0	0	0	0.281543	0	0	0	2.70282	1.93537	0.891093	0	0	0.400756	0	0	0	1.34481	0.932444	0	0.988435	0	0.613512	0
WP_014080084.1	MAGYVYTNENCIGCNRCISVCPVLTANQAVVVDGKPRIEVNHAQCINCGACFDACEHQAREYADDTEQFFADLQRGESISLLLAPAFLANYPREYEQILGGLRQMGAKRIISVSFGADITTWAYINYITKNQFTGGISQPCPAVVNYIEMYAPELLPKLMPVHSPMMCAAIYAKKYLHITDKLAFISPCIAKKNEISDPDTDGYVSYNVTFDHLMDYCRKHRISGPGVSDEIEYGLGSIYPMPGGLKENVYWFCGEDVFIRQIEGERHVYEFLDAYRKRVAEHKELPFMVDALNCAMGCIYGTGVEPEKTAGDDVLYELHKIREKSKKVKGPWARSATSKQRLAQLNRQFAQLEPADFTRRYTDRSKGNEIRVPEGQELEAVYSRLNKQTAMDRAIDCS…	[FeFe] Group C	[FeFe] Group C2	Sensory	Labile	1	[FeFe]-centre, 2 x [4Fe4S] clusters, PAS domain	Fusion with methyl-accepting chemotaxis protein	28.2249	18.6786	21.7683	28.9505	91.5239	16.05	40.5038	19.0981	37.4469	5.48052	14.6161	11.3886	12.2476	15.0536	63.0211	36.4385	26.8294	56.242	47.6589	19.7418	28.9209	48.1439	44.4749	22.8905	30.3232	16.8926	16.4506	17.8219	5.38008	31.5879	16.8318	65.7191	6.91323	20.0133	25.5514	51.2844	6.69354	7.90748	9.19697	7.97566	13.768
WP_023920581.1	MRGVETRIQEIRHKIFTEVARMAYHTEWSVKDRMEALPYKIIPGEKGNFRNDVFLERAIVGERLRLAMGLPYRSAAEHSPISDGIEAADKDETYYTPPLINVIKFACNACPEKRVHVTDGCQGCLAHPCMEVCPKDAVSLDRTTGKSVIDQEKCIKCGRCASVCSYNAIIVQERPCAKACGMDAISSDENGKANIDYDKCVSCGQCLVNCPFGAIADKSQIFQTIRAIQSGEKVYAAVAPAFVGQFGSKVTPGKLRAAMKALGFADVFEVAIGADLCAKQEAEDFLKEVPDELPFMATSCCPAWSVMAKKLFPEHAKCISMALTPMTLTARLIKQHNPDARVVFIGPCAAKKLEAMRRSVRSEVDFVLTFEEMTGIFSAKHVDLENIEEDPAGVSDAST…	[FeFe] Group B	[FeFe] Group B	Evolving	Labile	1	[FeFe]-centre, 2 x [4Fe4S] clusters	None	2.78593	1.61983	1.20935	0.904703	0	4.0125	6.13694	0	0.576106	0.913421	0	0	1.93383	12.0429	0	3.14125	0	3.87876	5.29544	1.97418	8.09786	0.703859	8.08635	0	0.928262	0	0	0	1.4673	0.672082	2.00378	0.644305	0	6.84666	0	0	0.608504	0	2.70499	0.613512	1.83573
WP_013931427.1	MKIIVNGKEITVNNNARNLLEALREVGIEIPNLCYLSEASIFGACRMCLVEVDGNIVTACTTPLKEGMVVKTHTPEIYELRRAILELLLASHNRDCTTCERNGNCKLQKYAEEFGIREVRFEKLSKNNIIDYSSPIIRDNSKCILCGDCVRACEEIQGVAAIDFAYRGFEAQVVPAFEEKLANTECVFCGQCAAYCPTGALTFRNDVEKVYKALKEGKYVIGMIAPAVRSAIQEEFDLGDDYVTAGRLVSILKMVGFKKVFDVSFAADLVAYEEAHEFLERIEKGEKLPLFTSCCPAWVKFAEQFYPEYLSHISSVKSPQQALGTVIKKYYAKEIGVRLEDICLVSIMPCTAKKFEAEREEHAGIVDVVLTTRELALFIKSTGINIKTVEPMPFDRPYG…	[FeFe] Group A3	[FeFe] Group A3	Bifurcating	Labile	3	[FeFe]-centre, 3 x [4Fe4S] clusters, 2 x [2Fe2S] cluster	NADH dehydrogenase, thioredoxin	0.474722	0.209858	1.20935	0	0	1.71964	0	0	0	0	0	0	1.93383	3.01073	0.677647	0	0	0	0	0	1.15684	0.703859	0	0	0.309421	0	0.967684	2.67328	0.489098	0	0.200378	0.644305	0	0.526666	0	0	0	0	0	0	2.7536
WP_008371804.1	MGYMTIDGRKVEFTDEPNVLSVIRNADIDIPTLCYHSELSVYGACRLCTVEDERGKTFASCSEPPRDGMVIYTNTPRLMKYRKMILELLLAAHCRDCTTCIKSGECQLQALAHRMGVTTVRFENTKEQYPLDFSSPSIVRDPNKCILCGDCVRMCDNVQSVNAIDFAYRGTKALVTPAFNKKIAETDCVNCGQCRVVCPTGAISINTNIEVIWDFLADKNTKVIAQIAPAVRVAVGDQFGLPRGENVMGKLVNVLHRLGFDEVYDTSYGADLTVIEESEELLERLASGENLPLFTSCCPAWVKFCENRYPDLAKNLSTCRSPQQMFGAVIREYYKDPEKNGGKRIVSVSIMPCTAKKEEILRPESSTNGKQDIDYVLTTTELITMIRKSGIRFENLEIE…	[FeFe] Group A3	[FeFe] Group A3	Bifurcating	Labile	3	[FeFe]-centre, 3 x [4Fe4S] clusters, 1 x [2Fe2S] cluster	NADH dehydrogenase, thioredoxin	56.1775	36.7523	69.5375	45.2351	23.2688	75.6644	57.0735	62.0689	96.2096	28.316	50.243	45.5545	4.51228	102.365	37.9482	16.9628	34.495	7.11105	1.76515	47.3802	69.9887	35.0522	53.909	66.5905	33.7269	78.3816	39.675	1.78219	54.2899	114.254	46.6881	70.2293	115.221	94.7998	108.929	96.0417	106.488	30.6415	86.5597	11.6567	89.033
WP_009139266.1	MARTTLSMHHIARVEGHGNVHVSIEDGKVRDVQMNIVEPARLFESMVVGRPYDKISYIASRICGICSSSHVVTDLLAIEDAFGVEVSDRTRMLRELLVYGSYLQNHASHLFVFAAPDFAGEESLFPLAVTEPELFNGGLAIKALGNELCTKVGGRSIHPITAVVGGFTHEVSPEEYIELADKLRDMRPFAEKVVDVFAAFPVPDIATKGDFLALREEGHYAVVSGRPCFAKDGFEFDCAQYRDYIEEYQVAHSAAYFSRRRDTQETFAASALARINVSWNELTREARLAAAKAGLRPPSLNPYSNNVAQAVELVDVCVRCEAMLRELAEGEGSSEPVDFEPRPGRGVGMTEAPRGTLVHDVEFDEAGRVVHANIITPTVHNLSDTEHNVFQVAELLANQ…	[NiFe] Group 3b	[NiFe] Group 3b	Bidirectional	Tolerant	4	[NiFe]-centre, 3 x [4Fe4S] clusters	Diaphorase, [FeS] protein	2.3417	1.39029	0	0	0	13.1839	4.90955	4.77453	4.60884	0	0	3.79621	0.644611	0	2.03294	5.026	0	0	0	0	1.73526	1.68926	4.04317	4.16191	0.618842	20.9468	0	8.91093	0.489098	0	0	4.51014	0	0	0	0	0	0.988435	6.49198	0	11.0144
WP_006861102.1	MGTMTIDGRKVTFTDEKNVLSVIRNAGIDIPTLCYHSELSTFGACRLCTVEDDRGKTFASCSEEPRDGMVIFTNTGKLRKYRKLIIELLLAAHCRDCLTCEKSGDCNLQTLAKRFGVMEVRFENYKERRPLDFSSPSIVRDPNKCILCGNCVRVCEELQGIGALGFAHRGSDAMVMPAFDREIATTDCVNCGQCRIFCPTGAISIRHNRGEVWEALSDPDTRVVAQVAPAVRVAVGDAFGLPKGRSVMGKIVNVLHRMGFDEVYDTTFGADLTIMEESAEFLERVQSGEKLPLLTSCCPAWVKFVGEHYPEFEENVSTCRSPQGMLSAVVKEYFRDPANSGGKKTVMVSIMPCTAKKMEANRPNSYTKGEKDTDFVLTTTELIDMIKTTGIDFAELEPE…	[FeFe] Group A3	[FeFe] Group A3	Bifurcating	Labile	3	[FeFe]-centre, 3 x [4Fe4S] clusters, 1 x [2Fe2S] cluster	NADH dehydrogenase, thioredoxin	43.8383	28.3068	23.5823	23.5223	40.3326	51.0161	76.098	58.8859	62.7955	20.0953	44.7619	34.1659	39.9659	21.0751	32.527	23.8735	57.4916	42.0199	21.1818	47.3802	56.1066	46.3139	41.7795	62.4286	22.5877	37.8394	64.8348	31.1883	45.9752	61.8315	40.6768	28.9937	54.1537	90.5865	40.3442	96.9741	89.45	24.7109	72.4938	21.4729	100.965
WP_027397032.1	MPEAILMAAEKMSAGGKHPLTAMFGRDETANGVGYVIYCYFEIPENKTVDGFKVVFNPNGSLEYDSITHIIPAAAWYEREIKDMFGLVPKGHPDLRSLVLHETFPEDFYPLRKNVKVNAKVRGERQFKVRTAKGEGLFEVPVGPIHAGIIEPGHFRFSQAGEAMLQLDAKLFYTHRGIEKAVEGKTPYEALPIVERICGACSVSNTWSFCQAVEKAVNVKVPRRAEIIRTLLMELERITNHVGDIGNIPAGVGFNPAISLGGRLKEKLMRLCEAVAGNRFLRGMIIPGGVSMDITPELCDRIHQVMDEVADGVEDMATMFREQENFQNRIQTTGIVRNQTAMDLAMVGVGARASGYSHDSRCDFSYGVYDELDFKPYTKTMGDVAARLLVRIGELSASF…	[NiFe] Group 4f	[NiFe] Group 4f	Evolving	Sensitive	6	[NiFe]-centre, 1 x [4Fe4S] clusters	NuoL, NuoH, two antiporter subunits	0.655117	0.287625	0	0	0	0	3.06847	0	3.45663	0	1.82702	0	0	0	0	0	0	0	0	19.7418	0	4.64547	1.34772	0	0	0	0	0	0.978197	0	0	0	0	0	0	0	0	0	0	0	0
WP_006568603.1	MPEAKKSTSFHELYKELLQKQMKNEDISEADYDPHQLDCLLNPDQYAPVIHTESCESCAYDRACKNSCIFDAIEEVDGKLSIDPDKCSGCGVCIESCRLDKLAESKDIFPVLKEVRSEEKDVYALIAPAFVGQYENASPGQLRSALKAAGFKGMVEVAVFADILTLKEALEFDEHINSNDDFQLTSCCCPVWIAMIRKIYHELIPHVPGAVSPMIAAGRAVKQIHPDAVTVFIGPCIAKKKEAREPDIADAVDYVLTFQEVQDIFDAAGIQPEELADNDREHSSRAGRIYAHTGGVSEAVRSTVEKLSPGRDVPVRAQQADGVPACKAMIEQIQKGETDANFFEGMACRGGCVGGPKIIIDKDKGKRNVETYGEEAPYKTPLDNPYVMELLHRLGFKNM…	[FeFe] Group B	[FeFe] Group B	Evolving	Labile	1	[FeFe]-centre, 2 x [4Fe4S] clusters	None	5.5718	6.22948	2.4187	0.904703	12.41	7.45179	1.84108	1.59151	10.3699	5.48052	0.913509	1.89811	25.1398	0	14.2306	48.3753	11.4983	5.17167	1.76515	1.97418	7.51944	2.11158	2.69545	4.16191	1.5471	4.72993	3.87074	3.56437	3.42369	4.70457	0.200378	12.2418	0	3.68666	2.68962	1.86489	0	11.8612	0	5.52161	0
WP_015869123.1	MRNVITTELTKLRRQIYIKLLQKIISGKYNEIPKISKEIIKEGSIPQGQDVYKTKITIDETIKIILGTDYSKTKDLELYELIPEMEAILKGESPLMNKSGKVINIIREICDGCPLPSYHITDMCRNCSAKYCINSCPRNAIPIVDGKPKIDSEKCVGCGLCAKNCPYGAIIKIQRPCVSACAVGATYSDENGFVLIDDEKCVQCGECAVACPFGAIVESSSIGQVAVRLGKEPMVAIFAPASVAQFGPRVSLGQFKKALKEVGFVDAFEVAIGADMVAKEEAEYVEENLERLGFITTSCCPAFKRMIETRFPELVEHISPSLSPMHMLAKKIKEDYPNAKVVFIGPCIAKKYEVTLQPYTDYALTYEEIASIFAVKGIEPANVEEEELNNATPYGRLFA…	[FeFe] Group B	[FeFe] Group B	Evolving	Labile	1	[FeFe]-centre, 2 x [4Fe4S] clusters	None	3.21018	1.98295	3.02337	3.61881	1.55125	6.87858	3.68216	1.59151	4.03274	1.82684	0.913509	0	15.4707	0	3.38823	1.2565	0	1.29292	0	0	1.15684	0.84463	2.69545	8.32381	1.85652	7.43274	2.90305	3.56437	3.91279	5.37666	0.200378	1.28861	4.60882	0	9.41366	1.86489	6.08504	3.95374	2.70499	7.97566	3.67147
WP_005487325.1	MLRAEIDGINLELEENISILDAAKKAKINIPTLCYEEGLSIYGGCRLCVVEIEGEELLKPACATNIKDGMKIQTHSKKVRELRKNLFELIIATHNIDCQLNCLTCSRANNCELKDIAEDIGVSKMRLDPIKRGQSIDNSSYAIIREPEKCISCNRCIRKCEEVQGIGIFTTANRGPETLVTTFKNRGMGNVECTNCGQCILSCPTGALHELYQKDSVLDILNDESKHVVVQTAPAVRVAISEPFSNQAGDISTGQMVTALKRLGFDAVFDTNFAADLTIMEEGTELINRINNNGRLPLFTSCSPGWIKFIEHFYPDYLENLSSAKSPQQMFGAIAKNYYAREEGIDPEDIVVVSIMPCTAKKFESKREEMAGDVDYVLTTRELASIIKSAGIDFLNLEE…	[FeFe] Group A3	[FeFe] Group A3	Bifurcating	Labile	3	[FeFe]-centre, 3 x [4Fe4S] clusters, 1 x [2Fe2S] cluster	NADH dehydrogenase, thioredoxin	0.942272	0.39599	0.604674	0	0	0	1.22739	1.59151	0.576106	0.913421	0	0	1.28922	0	1.35529	0	0	0.646459	0	0	1.73526	0.140772	4.04317	12.4857	1.5471	0.675704	0	0	0.489098	0.672082	0.200378	0	0	1.05333	0	0	0	2.9653	0	1.22702	0
WP_014080018.1	MYADENVIKIKHDVLYEVAKLAFAGELDEKRDNIAMSLIPGPTPQFRCCIYKEREIIRQRVRLAEGKAPGLTDDGNVIQVISSACEDCPISSYIVTENCQNCLGKACINACKFGAIEPGRTRSHIDPTKCKECGRCAQACPYNAIAHLKRPCKFSCPVNAITYDEHGISVIDKKKCIRCGKCIHSCPFGAIGSKSFIVDVINALREGKHVYAMAAPATEGQFGDDITMASWKNAMKELGFTDFFDVGLGGDMTAAYESEEWAEAYKAGEKKVTSCCPAFVNMVRLHYPDLADCVSTTVSPMCAVSRLIKARDPEAITVFIGPCIAKKSEVVDQQIPGNADYVLTYSEIRAIMKAKSVVLQPAANDDQIASTFGKRFANSGGVTAAVLQSLKESEDEIDA…	[FeFe] Group B	[FeFe] Group B	Evolving	Labile	1	[FeFe]-centre, 3 x [4Fe4S] clusters, 1 x [2Fe2S] cluster	None	84.2088	56.3878	165.076	109.469	68.2551	63.0536	31.2984	66.8434	16.7071	10.0476	47.5025	60.7394	11.603	45.1609	77.2517	262.609	53.6588	67.8782	102.378	211.237	86.1844	31.2513	37.7363	104.048	30.9421	46.6236	90.9623	58.8121	97.3306	102.829	49.0927	65.7191	48.3926	130.613	190.963	230.314	136.305	26.6877	38.9519	19.6324	91.7866
WP_025868115.1	MAFTNNVMIVRHKLLADLVRLWKKDELIDKIDRVPIELSPKKSKPLGRCCVHKERAVWKYKCLPLMGLDMTDEHDELTNLSEYARQALEREECTKENIFCVIDEACSSCVQINYEITNLCRGCVARSCYMNCPKDAIRFKKNGQAMIDHDTCVSCGICHRSCPYHAIVYIPVPCEEACPVKAISKDENGIEHINEDKCIYCGKCMNACPFGAIFEVSQAFDILQRIRKGEKMVAIVAPSILGQFKTSIEHVYGAFREIGFADVIEVAQGAMDTTSNEAHELLEKLEEGQAFMTTSCCPSYIELVEKHIPELKPYVSATGSPMYYAARIAKAKHPDARIVFVGPCVAKRKEIRRDEAVDFILTFEEIGSILDGMDIQLEQTQPFSLVYTSVREAHGFAQA…	[FeFe] Group B	[FeFe] Group B	Evolving	Labile	1	[FeFe]-centre, 3 x [4Fe4S] clusters, 1 x [2Fe2S] cluster	None	0.47978	0.438834	0	0	1.55125	0	0	0	0	4.5671	0	0	0	0	0	0	0	0	0	0	0	0.140772	0	0	0.618842	0	0	0	0	0	0	0	0	0.526666	0	0	0	0	0	3.68107	0
WP_004836902.1	MKESYIDILNIRRMAFEAVAKIAYEDRPITDIALEIYDILPGEEAKYRENIFRERAVMGERLRMCIGLDARTAANTDAVTDGLDSMDYDRRIYNPPLVSVIKIACEACPENKVTVTDQCHACIGHPCVNVCPKNAVSYSAKGAYIDQDKCIKCGKCVDACPYHAINHQKRPCAESCGVKAISSDDLGRADINEDKCVACGRCIISCPFGAISDKSEIYQLIKSLQSERKVYAIVAPSFVGQFGAHVSPEQIREAIKQLGFDDVIEVGLGADLTTMNEAHEFLEQVPTGEIPFMGTSCCFSWKSMVRKQFPDINDKISESSTPMIYSGKQMKKRDPNCEVVFIGPCISKKLEALEEEVAEVIDFVITYEELLGMFLAKGIEPSEIEVDEPMMDASETGRF…	[FeFe] Group B	[FeFe] Group B	Evolving	Labile	1	[FeFe]-centre, 2 x [4Fe4S] clusters	None	1.30346	0.701642	0	0	4.65376	1.14643	3.68216	14.3236	1.72832	3.65368	0	0	0	0	4.06588	0	0	0	0	0	0.578419	0	4.04317	2.08095	0	2.70282	3.87074	0	0.489098	0	0.601135	1.93292	3.45662	0	0	1.86489	0	0.988435	1.62299	3.68107	0
WP_008753040.1	MRGVETRIQEIRHRIFREVARMAYHTEWPVDKRIEELPYKIIPGEVGNFRNNVFLERAIVGERLRLAMGLPYRSAANHAPLSEGIEQADKAETYYTPPLINIIKFACHGCVEKRVYVTNGCQGCLAHPCAEVCPTGAVKIDKESGFSSINQEKCIKCGRCANVCAYNAIIIQTRPCAASCGMDAISSDENGKADIDYDKCVSCGQCLVNCPFGAISDKSQIFQTIRAIQSGERVYAAIAPAFVGQFGPKVTPGKLRAAMKALGFADVFEVAIGADLCATQEAEDFLTEVPEKLPFMGTSCCPSWALMAKKVFPDQANCISMALTPMTLTARLIKKHHPDGKVVFIGPCSAKKLEAMWTEVRSEVDFVLTFEEMAGIFDAKHIDIENLEEDPNGVNDAST…	[FeFe] Group B	[FeFe] Group B	Evolving	Labile	1	[FeFe]-centre, 2 x [4Fe4S] clusters	None	10.9561	7.87244	1.81402	9.04703	13.9613	4.0125	4.90955	12.7321	6.91327	12.7879	10.9621	11.3886	3.22306	6.02146	14.9082	12.565	0	10.3433	10.5909	9.87088	21.9799	5.20855	6.73862	18.7286	6.49784	18.244	20.3214	2.67328	5.38008	24.867	12.8242	10.3089	8.06544	27.3866	30.9306	17.7164	11.5616	11.8612	3.78699	3.68107	9.17866
WP_019880475.1	MQISESVKLHRKVLTEVARQTVNGTLDTDVESILQTVVSEAGPRYRCCIHKERAVLKNRITLAVGRSVEEDIHEATQKALKGEVLKEAAVLTVLPEACDQCPIDKFIVTDACRNCIAHNCINVCPKKAITIHQNRAYIDQEKCVECGACKRACPFGAIIEISRPCERACAVKAISAGSDRRAVIDIEKCVECGACKVACPFGAVADRSFIVPLIQDLKTTKKVFAMVAPAFVGQFGAGISPKKIFQALKQLGFSGVYEVALGADMVTLFEAEEFLETVPEQRKYMTTSCCPAFADLIRKHMPNILPHMSSTTSPMVATAEIVKKEYPDSVAVFIGPCAAKKSEARRYPDLIDYVITYEELAAMMVGAGINVTEIVEEDVEFLASRHGAIFGRAGGVLEA…	[FeFe] Group B	[FeFe] Group B	Evolving	Labile	1	[FeFe]-centre, 2 x [4Fe4S] clusters	None	1.63191	0.870297	0.604674	0	4.65376	0.573215	0	0	0	9.13421	0.913509	0	8.37995	3.01073	0	0.62825	3.83277	5.17167	5.29544	1.97418	0	0.140772	0	0	4.02247	0.675704	1.93537	0.891093	0	0	2.40454	0	0	0	0	0	1.82551	2.9653	0	0	0
WP_022739737.1	MAATEISVDHIARVEGHGDIRLVIEDGRVVTCEMAVVEPARLFESMVRGRSFEEVPYIASRVCGICSSSHVVTDLRAIEQVFGVEVADRTEALRELLLYGSYLQNHGTHLFVFAAPDFLGHKSVFPLAEGNPELFERALGLKALGNELCTLVGGRSIHPITAVVGGFTHEISADEYLRLAEAMDATREFALASVDLFRDFDTVDVQTEGDLLAMVAPGAYPVCTSDTLRFVRAGYDFSAQDVEEEIEEYPVGHSAAFLARARRTGRPYMTAALARVNASWDALSKDARYAAAKAGLRPPEYNPFANNIAQAVELVDALDRCAALCRRLAADEFEGSSEPVPFTVRAGRGVGFTEAPRGALFHILDINGEGRIERASIMTPTAQNIANLEADMRQLAEKM…	[NiFe] Group 3b	[NiFe] Group 3b	Bidirectional	Tolerant	4	[NiFe]-centre, 3 x [4Fe4S] clusters	Diaphorase, [FeS] protein	13.6266	8.94085	39.9085	20.8082	9.30752	28.0875	9.8191	15.9151	3.45663	3.65368	20.0972	1.89811	0.644611	0	0.677647	0.62825	0	3.2323	61.7801	0	43.9598	10.4171	4.04317	6.24286	1.5471	31.7581	26.1275	16.0397	0.489098	16.13	14.4272	2.57722	16.1309	0	38.9994	15.8515	26.1657	11.8612	9.73797	0.613512	34.8789
WP_020814848.1	MGTMIIDGQLVEYTDEKNILAVIRKAGIELPTFCYHSELSVYGACRMCMVEDKWGSTITSCSTPPKDGMEVWTNTDKLKKHRKMILELLLANHDRDCTTCEKSGRCKLQEIALKVGVKKVRFGQEKKEMPIDDLGPSIIRNPNKCILCGDCVRACQEIQGVGVLDFAYRGSNLQVTTAFNKSLQEVDCVNCGQCRVVCPTGALMIKKDIDRAYEALQNKNKRVIAQIAPAVRVAIGEDFGLQPGEISMGKIVAALRKLGFDQVFDTAVGADLTVIEEAEELMDRIQRKEKLPLFSSCCPAWFKYAEQKHPELMENVSSCLSPQQMFGAVIKEQFKKEHSTDERENIVIAIMPCTAKKYEASRPENTINGERQVDMVITTQELAIMIQENGIVFNELEDE…	[FeFe] Group A3	[FeFe] Group A3	Bifurcating	Labile	3	[FeFe]-centre, 3 x [4Fe4S] clusters, 1 x [2Fe2S] cluster	NADH dehydrogenase, thioredoxin	1.0987	0.564676	0.604674	3.61881	3.10251	0.573215	1.22739	0	1.15221	0.913421	0	0	1.28922	3.01073	1.35529	3.14125	0	3.2323	0	0	1.73526	0.84463	4.04317	6.24286	1.23768	0.675704	1.93537	0	0	2.01625	2.00378	1.28861	0	0	0	0.932444	0.608504	0.988435	0.540998	3.68107	0
WP_015925732.1	MGTMIIDGQHIEFTDEKNILAVIRKVGIELPTFCYHSELSVYGACRMCMVEDKWGSTITSCSTPPKDGMEVWTNTDKLKKHRKMILELLLANHDRDCTTCEKSGRCKLQEIALKVGVKKVRFGQEKKEIPIDDMGPSVIRNPNKCILCGDCVRACQEIQGVGVLDFAYRGSNLQVTTAFNKSLQEVDCVNCGQCRVVCPTGALMIKKDIDRAYKALHDKNKRVIAQIAPAVRVAIGEDFGLQPGEISMGKIVSALRKLGFDQVFDTAVGADLTVIEEAEELMDRIQRKEKLPLFSSCCPAWFKYAEQKHPDLMENVSSCLSPQQMFGAVIKEQYKREKASDEKENVVIAIMPCTAKKYEAARPENTINGERQVDMVITTQELAIMIQENGIVFNELEDE…	[FeFe] Group A3	[FeFe] Group A3	Bifurcating	Labile	3	[FeFe]-centre, 3 x [4Fe4S] clusters, 1 x [2Fe2S] cluster	NADH dehydrogenase, thioredoxin	0.572793	0.353649	0	0.904703	0	0	0	0	0.576106	1.82684	0	0	0	0	2.03294	0	0	1.29292	0	0	1.15684	2.53389	2.69545	2.08095	0.309421	0	0.967684	0	0	0	0.400756	0	0	0	2.68962	0	0	1.97687	0	0	0.917866
WP_028088444.1	MVNLTIDGREITVKENTTIMEAASQNGIPIPKLCYLKGINEIAACRVCVVELEGKEKLITSCNNIAKEGMVIHTNSPKVRRHRRTTVELILSQHDCECVTCSRSGNCSLQTVANDLNIIDIPFKMEIERQPWNKDFPLIRDSSKCIKCMRCVQVCEKVQGLGVWDVEGTGSRTTINVAGHRTIEEADCALCGQCITHCPVGALRVRDDTEDIWDAIADPDKIVVAQVAPAVRTAWGEEFGLSDDEATVGKILDALKRMGVDYAFDTTFSADLTIMEEGTEFLHRFTAGELKERPMFTSCCPGWLRFIKSQYPHLVRQLSTAKSPQQMFGAVMKTYFAEKLGVSPQRIYTVSVMPCVAKKEEKEMEMFYQEYAGHDIDTVITTRELTKMIKSAHISPDTL…	[FeFe] Group A2	[FeFe] Group A2	Evolving	Labile	2	[FeFe]-centre, 3 x [4Fe4S] clusters, 1 x [2Fe2S] cluster	NADH-dependent glutamate synthase	93.2197	65.745	45.3505	37.0928	10.8588	73.9447	83.4623	82.7585	57.6106	18.2684	103.226	39.8602	184.359	48.1717	64.3764	60.312	49.8261	58.1813	42.3635	140.166	109.321	38.4307	20.2159	81.1572	93.7545	141.898	74.5117	85.5449	43.5298	75.2732	88.1664	398.181	152.091	226.993	91.4469	231.246	209.325	143.323	133.086	66.8728	197.341
WP_015528256.1	MGIMTIDGQVIEFTDEPNVLSVIRKAGIDIPTLCYHSELSIYGACRLCTVEDDRGKTFASCSEKPRDGMIIYTNTPRLMRYRKLILELLLAAHCRDCTTCIKSGECHLQELAHRMGVHEIRFENVREIQPIDTSSHAIIRDPNKCILCGDCVRMCDNVQNINAIDFAYRGTDAQVIPAFNKKIAETDCVGCGQCRVVCPTGAISIHTNIDEVWEALADKNTKVIAQIAPAVRVAIGDNFGYAKGENVMGKLVGVLHRLGFDEVYDTSYGADLTVVEESKEFIERFTSGEKMPLFTSCCPAWVKYCENKYPEFVPNLSTCRSPQQMFGAVVREYYKDPEKNEGKKIVSVSIMPCTAKKEEILRPESYTNGKQDVDYVLTTTEIVRMIRKSGIVFDKVEIE…	[FeFe] Group A3	[FeFe] Group A3	Bifurcating	Labile	3	[FeFe]-centre, 3 x [4Fe4S] clusters, 1 x [2Fe2S] cluster	NADH dehydrogenase, thioredoxin	55.706	41.6873	3.02337	56.9963	44.9863	19.4893	3.68216	28.6472	122.134	55.7187	73.9942	45.5545	20.6276	129.461	46.08	84.8138	68.9899	36.2017	42.3635	181.624	70.5671	58.2795	30.9977	68.6715	18.8747	45.9479	76.447	4.45547	62.6046	38.9808	31.8601	10.9532	87.5676	67.9399	28.241	51.2844	9.12755	24.7109	54.6408	8.58917	122.994
WP_014016432.1	MPEFHSRFEKIDRRVPIDEHNCAVQFDVTKCKNCTLCRRACADTQTVLDYYSLSSTGDMPICVHCGQCSSACPFGAIVEVNDVDKVKAALKDPEKIVIFQTAPAVRVGLGEAFGMDPGTFVEGKMVAALRTLGADYVFDTDFGADLTIMEEATELLHRLQSEEIPIPQFTSCCPAWVEFAETFYPDLLQHLSSTKSPISILSPVIKTYFAQQKNIDPKKIVNVCVTPCTAKKAEIRRPELSASGLFWDEPEIRDTDICITTRELAQWIQDENIDFASLEDSKFDKAFGEASGGGRIFGNSGGVMEAAIRTAYHMFTGRPAPKDFIPFEPVRGLQGVKKATVIFGHFVLHVAAISGLGNARAFIDDLIKNDAFEDYSFIEVMACPGGCIGGGGQPKVKLP…	[FeFe] Group A1	[FeFe] Group A1	Evolving	Labile	1	[FeFe]-centre, 2 x [4Fe4S] clusters	None	4.52999	13.5424	0	0	0	4.0125	0	0	0	0	0	0	0	0	0	0	0	0	1.76515	0	0	1.68926	2.69545	0	0	0.675704	0	0	0	0	0.200378	0	147.482	0.526666	0	0	0	0.988435	0	0	0
WP_017416926.1	MNGQFMLIDNMPVEINGEKNVLELVRKAGIDLPTFCYYSELSVYGACRMCMVENKWGEIEAACSTPPKAGMEVYTNTPRLRKYRKMILELLLSHHCRDCTTCEKNGYCKLQDLAQRFGIKEIRFNNTSEEPALDKSSVSIVRDKSKCILCGDCVRMCDEVQNVGAIDFVGRGSEMTVSTAYDEPLAESNCVGCGQCAAVCPTGALVIKNDTSKLWKELSDKDTKVVVQIAPAVRVGISKELGCKDGENVMGKIVGALRKMGFNAVFDTSTGADLTVLEETGEFLARLEKNEKLPLFTSCCPAWVSYAENTHPDLLTNISTCRSPMQMFSSVLKEHYKHSSKKVVVVAIMPCTAKKFEAQRDEFKEDGIPYVDYVITTQELIQMIKESGIVFSEVEPEAV…	[FeFe] Group A3	[FeFe] Group A3	Bifurcating	Labile	3	[FeFe]-centre, 3 x [4Fe4S] clusters, 1 x [2Fe2S] cluster	NADH dehydrogenase, thioredoxin	8.66564	5.61597	6.65141	19.9035	26.3713	16.05	11.0465	7.95755	4.60884	15.5282	2.74053	15.1848	10.9584	3.01073	8.80941	0	3.83277	35.5553	17.6515	0	2.31368	4.50469	5.3909	29.1333	4.33189	16.8926	7.74147	1.78219	5.86918	2.68833	3.60681	7.73166	0	5.26666	6.72404	6.5271	7.91055	15.815	3.24599	11.6567	1.83573
WP_007960496.1	MVAKKIQENIKIDAELCTGCGRCSEVCPVDAIEGEEGKPQSVNVAKCVMCGQCVQICSAYDSPFEQYATSRSQRLKERNMPVVKEPLFAAYYHGDFFKVKKRLADKKQFSMVQCAPAVRVSLAEEFGMPLGSLVPGKMVAALKRLGFTRVYDTNFAADLTIMEEGSELVKRITEGGSLPMFTSCCPAWVKFVENEYPELIDHLSSCKSPQQMAGSMFKTYGASVDGVDAREVYSVAIMPCTCKKFEASRPEMKSSGYQDVDAVLTTRELAYLIKEAAIDFNALPEESFDKPLGMYSGAGTIFGVTGGVMEAAIRTAYELITKEPIENVNVTSVRGEQGVRKVTLDTGTLKLKTVVVSGLKNVIPILEDIQRGKADFHFMEVMTCPAGCISGGGQPKMLL…	[FeFe] Group A4	[FeFe] Group A4	Evolving	Labile	3	[FeFe]-centre, 2 x [4Fe4S] clusters	FeS protein, FeS protein	0.683309	0.326544	1.20935	0	0	0	0	1.59151	0.576106	0.913421	0	0	0	0	0	0	0	0	0	0	1.73526	0.703859	1.34772	10.4048	2.16595	0.675704	0	0	0	1.34416	0.200378	2.57722	0	0	0	0	0	3.95374	0	0	0
WP_002570913.1	MGFMTIDRIRVEFTDEPNVLSVIRKADIDIPTLCYHSELSIYGACRLCTVENERGKTFASCSEPPRDGMVIYTNTPRLMKYRKMILELLLAAHCRDCTTCIKSGECHLQELAHRMGVTHVGYENTKTQYPIDMSSPAIVRDPNKCILCGDCVRMCDNVQSVNAIDFAYRGTEALVTPAFNKNIAETDCVNCGQCRAVCPTGAISINTNIEVIWEALADPNTKVVAQVAPAVRVAVGDFFGMARGENVMGKIVNVLHRMGFDEVFDTAYGADLTVIEESKEFLERLVSGKNLPLFTSCCPAWVSFCENRYPEFKQNLSTCRSPQQMFGAVIQEYYRNPQKSGGKKLLSVSIMPCTAKKAEILQEESKTNGKADVDYVLTTTELVTMIRKSGIRFENIDIE…	[FeFe] Group A3	[FeFe] Group A3	Bifurcating	Labile	3	[FeFe]-centre, 3 x [4Fe4S] clusters, 1 x [2Fe2S] cluster	NADH dehydrogenase, thioredoxin	5.99047	8.10489	2.4187	3.61881	3.10251	2.29286	7.97802	7.95755	9.21769	2.74026	5.48105	3.79621	17.4045	9.03219	7.45411	1.2565	19.1639	0.646459	8.82573	1.97418	4.62735	7.88322	13.4772	18.7286	6.80726	4.05422	7.74147	0	2.93459	4.70457	1.40265	9.02027	4.60882	3.68666	0	6.5271	4.86803	9.88435	8.11497	4.29459	7.34293
WP_015560436.1	MYADENVIKIKHDVLYTVAKLAFEGRLEEERDHIATELIPGPTPQFRCCIYKEREIIRQRVRLAEGKAPGAEDDGNVIQVISSACEDCPISSYTVTENCQNCLGKACVNACKFGAIEPGRDRSHIDPSKCKECGRCAQACPYNAIAHLKRPCKFSCPVNAITYNEYGISVIDKEKCIRCGKCIHSCPFGAIASKTFIVPVIEALKAGKHIYAMAAPATEGQFGVDITMASWKKAMKEMGFTDFYDVGLGGDMTAAYEAEEWAEAYKEGNKKVTSCCPAFVNMVRLHYPELAECVSTTVSPMCAVSRLIKAKDPEAITVFIGPCVAKKSEVADQKIEGNADYVLTYSEIRAMMKAKGVELQPCANDDQTASTFGKRFANSGGVTAAVLESLKESNDEIAA…	[FeFe] Group B	[FeFe] Group B	Evolving	Labile	1	[FeFe]-centre, 3 x [4Fe4S] clusters, 1 x [2Fe2S] cluster	None	126.256	89.556	206.194	151.085	21.7175	75.0912	41.7312	60.4774	27.6531	12.7879	57.5511	121.479	24.4952	72.2575	81.9952	599.351	137.98	61.4136	188.871	305.997	174.682	63.488	10.7818	183.124	28.7761	105.41	168.377	71.2874	122.275	161.972	94.3782	61.209	103.699	230.68	242.065	288.125	156.994	47.4449	54.6408	29.4486	160.627
WP_005680505.1	MEDKQITLQIDGHFITVPEGSTILEAATKIGINIPTLCHIDLKGTCIKNNPASCRICVVEVIGRRNLAPACATRCTEGMVVKTSTLRVMNARKVVAELILSDHPNDCLTCPKCGNCELQTLALRFNIREMPFNGGELSPRKREITASIVRNMDKCIFCRRCESVCNDVQTVGALSAIRRGFNTTIAPAFDRMMTESECTYCGQCVAVCPVGALTERDYTNRLLDDLANPDKVVIVQTAPAVRAALGEEFGFPPGTVVTGKMVYALRELGFDYVFDTDFAADLTIMEEGSEILNRLTCYLNGDKSVRLPILTSCCPAWVNFFEHHFPDLLDIPSTARSPQQMFGSIAKSYWAKKMGIPKEKLVVVSIMPCLAKKYECARDEFKVNGIPDVDYSISTRELA…	[FeFe] Group A3	[FeFe] Group A3	Bifurcating	Labile	2	[FeFe]-centre, 3 x [4Fe4S] clusters, 1 x [2Fe2S] cluster	NADH dehydrogenase	9.02036	6.03713	7.86076	9.04703	4.65376	8.02501	0	0	0	37.4502	3.65404	81.6185	13.5368	9.03219	0	0.62825	0	9.05043	3.53029	1.97418	4.04893	12.951	0	0	8.9732	12.8384	15.4829	0	5.38008	2.01625	64.5218	0	0	0	0	1.86489	0	1.97687	0.540998	21.4729	3.67147
WP_015724294.1	MMKTKTAALTIDGRKVAIEGEKNLLELVRKAGIDLPTFCYHSDLSVYGACRLCLVDVEGRGILGACSTPPEPGLVVRTNTEELREIRKISVELLLANHDRECTSCVRSGSCQLQDIARRLGITKIRYRSIHQPKPVDTSSPSLIRDPNKCVLCGDCVRFCDEIQSIGAIDFAFRGHDAMVLPAFGHDLGTTECVNCGQCASVCPTGALAPASEIDAVWKAIHDPNTVVVAQIAPAVRVAIGEQFGLEYGLNTTGQVVAAMKRMGFNIVYDTSFTADLTVVEEAGEFMARKTNGERLPLFTSCCPGWVKFAEQYFPQLLGNLSSCRSPQQMMGSMVKHTLPAQLGRERKDVVMVSIMPCTAKKFEAKRPEFKTGGSPDVDFVLTTQELARMIEESGLSLN…	[FeFe] Group A3	[FeFe] Group A3	Bifurcating	Labile	3	[FeFe]-centre, 3 x [4Fe4S] clusters, 2 x [2Fe2S] cluster	NADH dehydrogenase, thioredoxin	0.38654	0.146367	0	0	0	0	0	1.59151	0	0	3.65404	0	1.93383	0	0.677647	0	0	0	0	1.97418	0.578419	0.281543	0	0	0	0.675704	0.967684	0.891093	1.95639	0	0	0	0	0	0	0	0	0	0	0.613512	0
WP_007290224.1	MSQVTEVVKIRRKVLSEIARLAFEGKLQDHVEDILHTVVTEEGPRYRCCVHKERAVLKDRINLALSQPINTDLKVAAQNALEGKIADMPFVNVLPEACDRCPIDKFIVTDACRNCVAHHCINSCPKKAIAVVQNRAFIDKNRCVECGLCKRSCPYGAIIEVSRPCERACDLKAVVAGADRRAVINYDKCVQCGACKIACPFGAIGDRSVIVQLIQDLKHHKKVYAIIAPSFIGQFGLKVRPGQVINALKQLGFYDVQEVSFGADIVTVEETKEFAATVPGERSFMTTSCCPAFVGMVEKHLPELRDKVSSTVSPMIATGKSIKVDDPEAIVVFIGPCIAKKVEAARYAGVIDYVLTFEELAAMLVGAGINVTEVADSEYQTTASRDGNIFARAGGVAQA…	[FeFe] Group B	[FeFe] Group B	Evolving	Labile	1	[FeFe]-centre, 2 x [4Fe4S] clusters	None	0.467037	0.182491	0	0	0	0	0	0	1.15221	3.65368	0	0	0.644611	0	0	0	0	0.646459	0	3.94835	0	0.703859	0	0	0.309421	0	0	0	0	0	0	0.644305	0	0	2.68962	0	0	0.988435	0	0.613512	0
WP_008369976.1	MNADGNVIKIKHDVLFEVAKLAFAGELEEQRDHLPLKLIPGPTPQFRCCIYKEREIIRQRIRLAEGKAPGPEDDGNIIQVISSACEDCPISSYTVTENCQNCLGKACINACKFGAIEPGHYRSHIDASKCKECGQCAKACPYNAIAHLKRPCKFSCPVDAITYDEHGISIIDKNKCIRCGKCIHSCPFGAIASKTFIVPVINALREGKHIYAMAAPATEGQFGADITMESWRKAMKELGFVDFYDVGLGGDMTAAYEAEEWAEAYKEGQKKVTSCCPAFVNMVRLNYPQLADNISTTVSPMCAISRMIKAQDPEAITVFIGPCLAKKSEVVDQQIEGNADYVLTYSEIRAIMKAKDVELEACPNDNQTASTFGKRFANSGGVTAAVLESLKESDNCIDA…	[FeFe] Group B	[FeFe] Group B	Evolving	Labile	1	[FeFe]-centre, 3 x [4Fe4S] clusters, 1 x [2Fe2S] cluster	None	92.5484	65.916	136.656	77.8044	31.0251	108.338	55.8461	100.265	76.0459	10.961	56.6375	85.4148	17.4045	90.3219	39.9811	199.784	45.9933	47.1915	45.8938	140.166	155.016	37.023	44.4749	122.776	31.2515	76.3545	89.0269	46.3368	103.689	190.199	80.7524	80.5382	103.699	192.76	180.204	204.205	123.526	38.549	60.0508	7.36215	165.216
WP_015706988.1	MSEKSYMKVDGIRVEIAGERNLLEVARKAGVEMPTFCYHSELSIYGACRMCVVEIEGAGLEASCSAQPRAGMSIHTNTVRLRRYRKNILEMLLANHCRDCTTCEKSRQCKLQELALRFNLDDVRFPNKAMDHKIDDQSLCLTRDSSKCILCGDCIRMCNEIQGVGAIDFAGRGASMRVSAIFDKPLAESGCVGCGQCARVCPTGAIVVKNDSAAVWRALEDKNSVVSVQIAPAVRVALGDAFGLEGDCSGLIVAALRRIGFDVVYDTATGADLTVIEEASELMQRVKEKKALPLFSSCCPAWVTFCEQRYPELLNCVSSCRSPMQMLASLIRETEKNAKGDDEIKYVHVAIMPCTAKKAEAARSEFRAADAQDVDHVLTTLELIRMIREAGIVFSELES…	[FeFe] Group A3	[FeFe] Group A3	Bifurcating	Labile	3	[FeFe]-centre, 3 x [4Fe4S] clusters, 1 x [2Fe2S] cluster	NADH dehydrogenase, thioredoxin	1.93472	1.10766	0	8.14233	0	0	0	0	1.72832	2.74026	0	1.89811	0.644611	0	0.677647	0	15.3311	3.2323	1.76515	0	0	4.22315	8.08635	0	12.6863	5.40563	0	0	3.91279	0	2.20416	3.22153	0	0	2.68962	0	0.608504	0.988435	0.540998	2.45405	0
WP_015515272.1	MKTTFITDINKIKFEVNTEVARLAFAGELDEKANEIPYKLIPGRTPHYRCCVYREREIIRERVQLAMGRSAMSGQKNKNIVQVIEAACEGCPINRFNVTNNCQMCMAKKCLGACNFGAIKFEGGHAVIDHKKCKECGKCAEACPYNAIADLMRPCKRSCPVDAITMDEDNIVVINEEKCINCGQCVINCPFGALSDRSFMVDVIKLISSGAPVYAMVAPAIEGQFGPDVSVGMIREAVMKLGFRDMYEVSLGADFVSKNEGQELLEHYEAGEKMTTSCCPAFVSLIKKHYPQVLKYMSTTVSPMTATGRLIKAMHPDAVCVFIGPCIAKKSEVIDSITFGGADYAMTYEELASMFEAKNIDPEECTETMQQGSKFGKQYSVSGGVTAAVLETFKEANKE…	[FeFe] Group B	[FeFe] Group B	Evolving	Labile	1	[FeFe]-centre, 3 x [4Fe4S] clusters, 1 x [2Fe2S] cluster	None	16.8159	11.5616	10.8841	14.4752	13.9613	42.4179	39.2764	33.4217	22.4681	14.6147	22.8377	11.3886	22.5614	39.1395	18.9741	5.65425	15.3311	29.7371	31.7726	15.7934	6.94103	16.3295	16.1727	10.4048	12.6863	15.5412	7.74147	33.8615	23.4767	23.5229	8.81664	5.15444	12.6743	1.58	5.37923	27.9733	8.51905	17.7918	17.3119	15.9513	21.1109
WP_007060145.1	MKMVNLTINDIKVSVPEGTTILDAAKKVNINIPTLCYLDLHDIKMVNRTSSCRVCLVEVEGRRNLAPSCSTEAFEGMIVKTNSPRAIKARRTMVELLLSDHPTDCLVCEKNTQCQLQLIAAELGIRKIRYKGAMSNYKKDSSSGAIYRNLDKCIMCRRCETMCNEVQTCQVYSAVDRGFETVVSPAFGRPMLDTQCTFCGQCVSVCPTAALTEVSNVAKVWEVIADPDKYVVVQTAPAIRVALGEKFGMEPGTIVTGKMVAALRRLGFDKVCDTDFAADVTILEEAHEFIDRLQNGGRLPILTSCCPSWVKFIEHQFPDLLDIPSTCKSPHIMFGTLAKTYMAEKLNIDPSKIVVVSVMPCIAKKYEISRPELEHEGEKNVDLVVTTRELADMIMEAGI…	[FeFe] Group A3	[FeFe] Group A3	Bifurcating	Labile	3	[FeFe]-centre, 3 x [4Fe4S] clusters, 1 x [2Fe2S] cluster	NADH dehydrogenase, thioredoxin	0.825601	0.556663	1.20935	1.80941	0	0.573215	1.22739	1.59151	0	0	0.913509	0	0	0	0.677647	0.62825	0	0	0	0	0	0.281543	0	0	1.23768	0	0.967684	0	0.978197	0.672082	1.40265	1.93292	0	2.63333	1.34481	1.86489	0.608504	0.988435	1.082	1.22702	0.917866
WP_022740096.1	MTRSVIDPITRIEGHLRVEMEVENGVVADAWVSGGCFRGMELVVQNRTPEDAAQIVERICGVCPVSHAHASSIAGDKAYGITISNNARIVRNLLEGAQFLHSHILWLYNLAALDYVNPLNALQANVDDAYAVALENGLALHSDLNQLYEKLAAFADNGQLSIFSGNWFDADGGEAYVDNPEANLILTSHYLEALKMQARSSEMAALLGGKMPHVMTSIPGGNMWVPTESKLDDLLAMATEVRDWVNDTVLADTVMLAKLYPEVLTFGKGCGRYIAWGVFEGPDWPYGDNYTEQMLNRYLPMAVLDEQFQASDVQENLITEYMGRSWYKGSETYTSPYFVTDPDFTEYNVDDRYSWVKAPAYDGKPMEAGSMARIFAAYVRGVPFIKEQVDAVLGILGAK…	[NiFe] Group 1a	[NiFe] Group 1i	Anaerobic Uptake	Sensitive	3	[NiFe]-centre, 3 x [4Fe4S] clusters	Cytochrome b	12.4209	8.54682	40.5132	25.3317	3.10251	25.2215	4.90955	12.7321	2.30442	9.13421	13.7026	3.79621	0	0	0.677647	0	0	0.646459	42.3635	0	46.2735	6.61627	1.34772	6.24286	1.5471	29.0553	19.3537	6.23765	0.489098	19.4904	13.4253	5.15444	13.8265	0	26.8962	14.9191	30.4252	10.8728	12.984	0	26.6181
WP_005028324.1	MSKTVIAIDPVTRLEGHLKVEVQVEDGKVADAWITGGMFRGFEAILRGRNPRDASQIVQRICGVCPVAHATASSLAIEAVCGVEVPENGRIARNLMLAGNYLQSNILHFYHLGGQDYFHGPDTVPFIPRYRNPDLRLSEEQNTLAMDEYIEALEVRQVCHQLVALFGGRMPHLQGILGGGAAQIPDRETILEYAARMKQVRKFVENRYLPLVYTIASRYMDMFEMAHGYKNALCVGVFPLAKKGEQFFNAGAYINGRDEPFDGNRILEDVRYSWFEPAPSGTPLQKSESNPQVDKEGAYSFIKAPLYAGHRVEVGPLARMWINDKPLSPIGQRFFADMFGVRAETFRQIGEDPAFSIMGRNVARVEEVYQTLGMIEYWLHELEPGAQTFALPEVPQAGE…	[NiFe] Group 1a	[NiFe] Group 1a	Anaerobic Uptake	Sensitive	3	[NiFe]-centre, 3 x [4Fe4S] clusters	Cytochrome	0.785559	0.41832	0	4.52351	0	0	1.84108	0	1.72832	0	1.82702	1.89811	1.93383	0	0	0	0	0.646459	3.53029	0	0	0.563087	0	0	0	1.35141	0	0.891093	0	0	0.801513	0	0	0	0	0	0	0	0	0.613512	0
WP_004329321.1	METIKLTIDNRTAEVAPGTNLVEAAASVGIKIPTLCYLNLHELGCKNDPGVCRICVVEVEGRKNLAPACKTVCTEGMVVRTHTPRVINARQTILELILSDHPNECLTCSKNGYCSLQTMAKDLGIREAKYKGETTKPMMDLSPSVVRNMEKCILCRRCETVCNQVQTVGALSVVGRGFTSVLCTAFNDPILTTNCVNCGQCVAVCPTSALSENSNIREVMQALADPGKTVVVQTAPAVRVALGQDFGLEGRSVTGKMTTALRRLGFDYVFDTDFAADLTIMEEGTELLQRLNKYLAGDRTVKIPLMTSCCPGWVSFMEKHFPELGENLSTAKSPQQMFGAIAKNYLAPKLGIDRRNFIVVSVMPCVAKKSEAARPEFGKDGDPDVNISITTRELAHMIR…	[FeFe] Group A3	[FeFe] Group A3	Bifurcating	Labile	3	[FeFe]-centre, 3 x [4Fe4S] clusters, 1 x [2Fe2S] cluster	NADH dehydrogenase, thioredoxin	74.1041	53.6622	0	203.558	88.4214	52.1626	44.1859	57.2944	126.743	132.446	42.9349	157.543	0	3.01073	8.80941	0	348.782	45.2521	0	0	13.8821	153.16	74.1249	4.16191	7.73552	52.7049	96.7684	20.4951	34.726	14.1137	279.327	0.644305	4.60882	12.1133	21.5169	31.7031	0.608504	45.468	21.6399	39.8783	26.6181
WP_009139152.1	MVGNMEKDACRVQSDASKVCVTIDDIEVSVPRSATVLEAARIAGVDIPTLCYLELYNEIGACRICLVEVEGIDHLVAACNSPVFDGMKVRTDTQRVRSSRKMNLKLILSRHDRRCPTCFRNGTCRLQELADTMGIHEVSFKTSFDESPVDDRYPLVKEPAKCISCLRCVSVCSKVQALSVWGLVDSGSRSRVDAVAKDDCSYCGQCITHCPVGALHERSDVSRVFDAIDDPEITTIAQIAPSVRTSWHEGLGLAKDKASVGRMVAAVKSLGFDYVFDTDFAADVTIMEEGSELLDRLGKGGDGPMFTSCCPGWVRFLKARYPELVSKLSTTKSPQQIFGALAKTYYAKLLGVDPSRLFVVSYMPCVAKKAECAYPGMDAAGTGFDVDAVLTVRELTRQI…	[FeFe] Group A2	[FeFe] Group A2	Evolving	Labile	2	[FeFe]-centre, 3 x [4Fe4S] clusters, 1 x [2Fe2S] cluster	NADH-dependent glutamate synthase	3.49418	2.39874	1.20935	0.904703	3.10251	22.9286	7.97802	11.1406	1.15221	1.82684	1.82702	7.59242	0	0	0.677647	11.3085	0	0.646459	0	0	2.31368	1.54849	6.73862	2.08095	3.09421	24.3253	1.93537	22.2773	1.4673	0	2.20416	5.79875	16.1309	0	0	1.86489	0	0.988435	3.78699	3.06756	0
WP_028027642.1	MVTITLNGRAVEVAEGSTLLEAAVAMGVNIPTLCYLKDLNCIGSCRVCLVEVEGQGLVTACNTAAAEGMVVRTDTPQVAAARRANLQAIMDGHRALCATCVRQDTCALRSLSSAFNVQDADEALPVPEPWDADFPLQRDSSKCIKCMRCVAICDKVQHCGVWDFTGVGPSMKVIVRDNLPIADAGCALCGQCITHCPTGALTARDDVNRIMDAILDPAVETVVQVAPAVRAAWGEGVGLSRAEATPGRLAAALHAVGFDKVFDADFAADLTIMEEGSEFVEFLGSDKPRPMFTSCCPGWVRFVKLHYPQFTAQLSSAKSPHQMMGAVVKNTLAAEAAEAGKRLFVVSIMPCVAKKYECDVPELATEADADVDAVLTVREFNRLLRMVGVNCANLTETPF…	[FeFe] Group A2	[FeFe] Group A2	Evolving	Labile	2	[FeFe]-centre, 3 x [4Fe4S] clusters, 1 x [2Fe2S] cluster	NADH-dependent glutamate synthase	4.15547	2.77002	9.67478	6.33292	0	9.17144	1.84108	6.36604	1.72832	0.913421	1.82702	0	0	0	0.677647	1.2565	0	0	14.1212	0	13.8821	3.23775	1.34772	2.08095	0.309421	11.487	8.70916	0.891093	0.489098	0	9.01702	2.57722	10.3699	0	5.37923	7.45955	10.3446	0.988435	3.78699	0	5.5072
WP_019266264.1	MILPIGPIHPYLKEPIRLKLQTEGEKVVKAEIEYGYVHRGIEKIIEGKTWQKGIYLAERVCGICSYEHTQSFAETIERISGVYAPLRAQFLRVITNELDRIQSHLLGNSTFFKSIDHETLYMQSLDIREYAMDAIELLTGNRVNMGWNVVGGVKMDADERHFKPILDNLKIIEERIPRLREIYAEGPAIGMRSRNVGVMTKKEAIKGKAVGPIGRGSGLKYDLRQDHYTYKDHFDFKTIWRKEGDNYARTLNRIDEIPECISLIRQAIENIPEGDIRIPVDIKSGYGEWKNEAPRGEVSYMIETNGNLIKHISIRTPSISNMDSCAKYMIKDVATVADAVATYASSDPCVACAERVAVTDKQGNTTTKNIFEVR	[NiFe] Group 4d	[NiFe] Group 4h	Evolving	Sensitive	20	[NiFe]-centre, 1 x [4Fe4S] clusters	NuoH, NuoL, Two polyferredoxins, eleven TM proteins, three hypotheticals	17.5747	13.0149	0	20.8082	49.6401	0	0	0	12.6743	88.6018	0	0	0.644611	0	60.3105	0	0	0	0	0	0	0	0	0	40.2247	31.0824	41.6104	18.713	75.8103	0	0.200378	0	23.0441	0	0	0	0	242.166	0	145.402	0
WP_007861015.1	MRGVETRIQEIRHRIFTEVARMAYHTEWPVDKRIEELPYKIIPGEVGKFRNDVFLERAIVGERLRLAMGLPYRSAAESAPISDNIGAADQSETYYTPPLINVIKFACNACHEKRVVVTDGCQGCLAHPCVEVCPKDAVSIDRSNGRSHIDQDKCIRCGRCAEVCSYHAVIVQERPCAAACGMDCIHSDENGKADIDYDKCVSCGMCLVNCPFGAIADKSQIFQVIRAIQSGERVYAAVAPAFVGQFGPKVTPGKLRAAMKALGFADVFEVAVGADLCATQEAIDFMQEVPEKLPFMATSCCPAWSMMAKKLFPEQADCISMALTPMTLTARLIKRHHKNAKVVFIGPCAAKKLEAMRTDIRSDVDFVLTFEEMTGIFDAKHLEVEKMEEDPDGVNDASM…	[FeFe] Group B	[FeFe] Group B	Evolving	Labile	1	[FeFe]-centre, 2 x [4Fe4S] clusters	None	47.0676	34.1895	24.7916	37.0928	26.3713	56.7483	55.8461	58.8859	44.3601	29.2295	46.5889	22.7773	58.6596	48.1717	24.3953	18.2193	38.3277	78.2216	70.6058	39.4835	64.7829	25.6205	17.5204	43.7	30.9421	32.4338	61.9318	46.3368	47.9316	75.2732	31.0586	57.3432	42.6316	87.4265	59.1716	48.4871	91.884	29.653	60.0508	15.9513	57.8256
WP_027096606.1	MINLTINGLPCQATKGSTILEAAIENDFHIPTLCHLKDVHKFGTCRICVVEQVGAKNLQASCMVEAQEGMEIYTHSDRVRRARKTLYQLMLSDHNKNCLSCIRNQDCDLQAMGRELGVLSDPYAGANNPGKPDFSESILRDSTKCILCRRCVTVCNDIQQVCVLNAQSRGFLTTVSPAANMRLGESNCTYCGQCVSVCPVGALAETSHKERVWQALGDPEKFVVVQTAPAVRVGIGECFGLEPGTSLTGKMVTALQVMGFDAVFDTNWGADLTIMEEGTEFLNRLKDTLTGKQATLPMMTSCSPGWVKYIENHFPDHLDHLSTCKSPHTMLGAVVKHYYAKKIGKNPEDMYVVSVMPCTAKKTEIARREMCNDGVPNVDAVLTTRELGDMIRSTGTNFL…	[FeFe] Group A3	[FeFe] Group A3	Bifurcating	Labile	3	[FeFe]-centre, 3 x [4Fe4S] clusters, 1 x [2Fe2S] cluster	NADH dehydrogenase, thioredoxin	5.71826	3.90632	4.23272	1.80941	6.20501	7.45179	6.13694	11.1406	9.79379	1.82684	3.65404	9.49053	0.644611	6.02146	0.677647	0	0	7.11105	0	0	0	3.66006	0	2.08095	2.47537	12.1627	2.90305	18.713	8.80377	4.70457	2.20416	21.2621	14.9787	0	4.03442	2.79733	10.9531	15.815	5.40998	15.9513	5.5072
WP_019262624.1	MKDRIVISPTSRQEGHAELVMEVDDEGIVTKGRYLSITPVRGLEKMVAGKNPETAPVLCQRICGVCPIPHTLASVEAIDHSLDIEVPKAGKLLRQATLAAHGVNSAAIHHFLIAPDFVPEEDFTTAVKSVSAVRKNVQYVVDMLAGEGIHPSDIRVGGMARNITSATKDKLIDRLKAFKPDMEKHVELMKSFIAARELPEGLGIVDAPLLASSASYGNLDEFDYDNFSEVLPEAWYDDPEIGKKACTTIPLINGKNVETGPRARMDKFNGFKDKGVVAQHVARAEEMLNNYNLTIDLLEQIDTSAPARADYDDRGTGKLGIGVIEGPRGTNVHMANVKDSKIQFYSAIVPTTWNIPTMGPATEGFHHKYGADVIRAYDPCLSCATHVMVVDDEDKSILK…	[NiFe] Group 3a	[NiFe] Group 3a	Anaerobic Uptake	Sensitive	3	[NiFe]-centre, 3 x [4Fe4S] clusters	F420 reductase	20.3933	15.2433	0	26.2364	46.5376	0	0	0	17.2832	58.4589	0	0	0	0	115.2	0	0	0	0	0	0	0	0	0	53.8392	54.0563	23.2244	20.4951	102.711	0	0	0.644305	24.1963	0	0	0	1.21701	271.82	0	168.102	0
WP_021739962.1	MNKFFHSVYLDSDKCTGCITCLKRCPTQAIRVRDGKAHIINEFCIDCGECIRHCPHHAKHTKRDFIPVLKDYKYTVALPAPSLYSQFNNVKDTNIILTALVLAGFDDVFEVSAGAEIISELSRKYISEHPELYPLISTACPTVERLIRVRFPGLIPHLLPILPPMEAAAIIARKRAAAKTGLDPSDIGIIFLSPCPSKITFIYDPLGMRESNVDAVLAIKDIYPLLLSHMKEAQKQLENKVSYTLSGRIGKGWAISGGEAYGIISDHYLAADGIENVIRVLEDLEDEKILPGLQFVELNACSAGCVGGVLTVENPYIAKAKVKQSSKYEPVLRMHCADFQEEPPEIFGWTEPVAYEPVYTLGANIFESMEKILESQEILKELPGLDCGSCGSPTCKALA…	[FeFe] Group C	[FeFe] Group C1	Sensory	Labile	2	[FeFe]-centre, 2 x [4Fe4S] clusters, PAS domain	Histidine kinase	10.9613	7.80041	9.07011	27.1411	9.30752	17.7697	7.36432	1.59151	17.8593	0	15.5296	0	3.86767	6.02146	3.38823	8.16725	3.83277	1.93938	19.4166	11.8451	41.0677	6.05318	6.73862	12.4857	21.0406	2.70282	5.8061	2.67328	8.80377	26.8833	17.2325	12.2418	5.76103	7.37332	8.06885	9.32444	34.0762	0	12.443	2.45405	26.6181
WP_022741745.1	MVTITLNGQAVEVAEGSTLLEAATAAGVNIPTLCYLKDLNCIGSCRVCLVDVEGQGLVAACNTAAAEGMVVRTDTPQVAAARRANLQAIMDDHRALCATCVRQDTCALRFLSSTFNLQDAGEALPVPEPWDATFPLQRDSSKCIKCMRCVAICDKVQHCGVWDFTGAGPSMKVIVRDNLPIADAGCALCGQCITHCPTGALTARDDVSRIMDAILDPAVETVVQVAPAVRAAWGEGVGLSRDEATPGRLAAALHAVGFDRVFDTDFAADLTIMEEGSEFVEFLGSDAPRPMFTSCCPGWVRFVKQHYPQFTAQLSSAKSPHQMMGAVVKNTLAAEADEAGRRLFVVSIMPCVAKKYECDVPELSTVVGATHGNGTSDANLAPDAPAAPELAAEATPDVD…	[FeFe] Group A2	[FeFe] Group A2	Evolving	Labile	2	[FeFe]-centre, 3 x [4Fe4S] clusters, 1 x [2Fe2S] cluster	NADH-dependent glutamate synthase	17.5392	12.5989	45.9552	37.9975	6.20501	32.1	1.84108	30.2387	0.576106	5.48052	21.9242	9.49053	0.644611	0	2.71059	0.62825	3.83277	2.58584	72.371	0	68.8318	11.2617	1.34772	10.4048	1.85652	48.6507	33.8689	7.12874	0.978197	15.4579	19.4367	3.86583	8.06544	0	32.2754	14.9191	23.7316	23.7224	12.443	0	23.8645
WP_011629764.1	MSVVTTSNGFTLNDGGRRLVVDPVTRIEGHMRCEVNLDENNVITNAVSTGTLWRGLEVILKGRDPRDAWAFTQRICGVCTGTHALTSVRAVEDALGISIPENANSIRNIMQLALQVHDHLVHFYHLHALDWVDVVDALKASPQATSSLAQSISSWPLSSPGYFRDIQHRLKRFVESGQLGPFANGYWGNPAYKLPPEANLMAVAHYLEALDFQKEITKIHAVYGGKNPHPNWLVGGVPCPINMDDTGAGGAINIERLNLVSEIIDRCIQFVDQVYLPDLKAIASYYTDWLYGGGLASRSLLSYGDVPEHANDYNSLLMPKGAIINGKLDEVHPVDLRDPDEIQEFVTHSWYRYGDDDIGLHPWDGITEADYRLGPNTKGRHDNIQQLDEAGKYSWIKAP…	[NiFe] Group 1d	[NiFe] Group 1d	Aerobic Uptake	Tolerant	3	[NiFe]-centre, 1 x [4Fe3S] cluster, 1 x [3Fe4S] cluster, 1 x [4Fe4S] cluster	Cytochrome b	0.576801	0.348213	0	0.904703	0	0.573215	0	0	0	0.913421	0	0	0	6.02146	0	0	0	0	0	0	0	0	0	0	0	0	2.90305	0	0	0	3.40643	0	0	0	0	0	0	0	0	0	0.917866
WP_028533896.1	MKAQINGKEYSFESSDTILKLARRNGIYIPTLCELHDTGHAPGTCRVCMVEVRTEGAEAAYVTACDTPLQDGARIYTRTPKVQELRRMQLDLMMGDHNQDCASCSRHGACELIDVADAVGLKKSSISIQPLQTAPCEAADSAVVYDQSRCIRCMRCVSICRDTQGVDALEVSGRGVNSAIVIKDGKTRNESDCVSCGQCVMVCPTGALSERDQTQEVIDYLADPKIVTVFQIAPSIRVGFGEEFGLEPGGNVEGKVVAALRAIGADVILDTNFAADVVIMEEGTEVLGRVTRSEGTTFTSCCPGWVDFAEKNFPQILPMLSSTRSPQQVLGSLAKTYLPNKMDIDPARIRVVSIMPCTAKKNEAARPELGKDGIPDVDIVLTIREFARLLRREGVDLRE…	[FeFe] Group A2	[FeFe] Group A2	Evolving	Labile	2	[FeFe]-centre, 3 x [4Fe4S] clusters, 1 x [2Fe2S] cluster	NADH-dependent glutamate synthase	0.70477	0.488451	0.604674	0	0	0.573215	0	0	1.15221	0	0	0	1.28922	0	3.38823	0	0	0.646459	0	0	0	0.281543	1.34772	0	0.928262	0.675704	0.967684	0	1.95639	0	0.400756	3.22153	2.30441	0.526666	1.34481	0.932444	0.608504	0	0	6.13512	0
WP_028972813.1	MINVKINGTPVQVESGTSILNAAKAAGVKIPTLCAHPDLPPNASCGICVVKQEGSPKMVRACAAACTEGVNYITHDPEIVEVRKSVVELILANHPNDCLTCGRSGNCELQKISADFGIREIPFSRGTKKLPRDTSTPSIVLNPEKCIGCGRCVTVCQQLQDVWALEFLDRGDETKMAPAAGVLLNDSPCIKCGQCSAHCPVGAIFERDQTQDLWDAIRDPAKHVAVQVAPAVRVAIGEAFGLEPGVISTGKLYAALRRLGVDAVFDTNFAADLTIMEEGTEFVERFTKGGILPQITSCCPSWVDYMEKYYSDMIPNFSTAKSPMMMQGAMTKTYYAEVGKLDPANIYSVAIMPCTSKKYEIDRDDAMRSSGYADMDLSITTRELSRMIKQAGIDFNSLP…	[FeFe] Group A3	[FeFe] Group A3	Bifurcating	Labile	4	[FeFe]-centre, 3 x [4Fe4S] clusters, 1 x [2Fe2S] cluster	NADH dehydrogenase, thioredoxin, thioredoxin	0.913758	0.456564	0.604674	0	0	0	0	3.18302	1.15221	1.82684	0.913509	0	0.644611	3.01073	0.677647	0	0	0	0	0	0.578419	0.422315	4.04317	20.8095	0.928262	0	0	0	0	0	0.200378	0	1.15221	0	0	0	0	0.988435	0	1.84054	0
WP_026649549.1	MGHMIIDGRKVEFTDEKNVLSVIRKAGINIPTLCYHSEVSTFGACRLCTVEDERGKTFASCSEQPRDGMVIYTNSGRVKKYRKLIVELLLAAHCRDCTTCVKSGECVLQELAHRLGVQTIRFKNTREYHELDTSSPSLVRDPNKCILCGDCVRACEELQGIGALGFAFRGTEAMVMPAFNKKIAETECVNCGQCRVYCPTGAIAIKTHMDEAWEALADPNIRVVAQIAPAVRVAVGDHYGLTKGKSVMGKIVNALHRMGFDEVYDTSFSADLTIMEESAEFLDRIKKGEKLPLLTSCCPAWVKFITDQYKEYIPNLSTCRSPQGMLSAVIKEYFRDPEHAGGKKTVMISIMPCTAKKAEAVRPNSFTDGEQDTDIVITTTELLRMIDNFGLDFATLDPE…	[FeFe] Group A1	[FeFe] Group A1	Evolving	Labile	1	[FeFe]-centre, 3 x [4Fe4S] clusters, 1 x [2Fe2S] cluster	None	442.675	332.739	228.567	276.839	172.189	304.95	795.347	520.424	458.004	201.866	479.592	404.297	599.489	487.738	180.254	170.256	222.301	528.804	462.468	294.152	447.118	169.489	103.775	210.176	127.172	208.117	331.916	888.42	525.781	948.98	201.18	459.39	678.649	1396.72	535.234	772.063	1266.9	347.929	883.991	130.678	871.973
WP_022739883.1	MSKATVIPFGPQHPVLPEPLHLDLVVQDETVVDVLPQIGFVHRGLEKLVETRDYNQFIYIAERICGICAMGHSLGYAETVESLMGVEVPKRAEYLRVIWHELSRIHSHLLWLGLAADAFGFESMFMHCWRLRERVLDLFEKTTGGRVILSVVKVGGVVRDIDANQMAEIVSVLDGIKDEYTQIMNTLLTDTSVKNRTVGVGHITTEDAAALSMVGPFARASNLPYDVRSFGRGAYGDLADFAPITATEGDCYARVKVRCLEVLQSIEIIKELGAKIPAGDIEVAVKGAPADGAQASNVLEQPRGECYYYARGNGSKNLERMRMRTPTSQNLAGMTVALKGCDLADVNMIILTIDPCISCTER	[NiFe] Group 4e	[NiFe] Group 4e	Evolving	Sensitive	6	[NiFe]-centre, 1 x [4Fe4S] clusters	NuoL, NuoH, NuoC, [FeS] protein	7.79943	5.43574	15.1168	12.6658	1.55125	11.4643	1.22739	6.36604	2.30442	5.48052	8.22158	7.59242	0.644611	0	2.71059	1.88475	3.83277	1.93938	22.9469	0	30.6562	4.08238	1.34772	8.32381	0.618842	29.0553	9.67684	1.78219	1.4673	11.4254	8.81664	2.57722	10.3699	0	21.5169	9.32444	18.2551	3.95374	3.24599	0	11.9323
WP_012625505.1	MTSTFTMPLGPVHVALEEPVYFHLTVDGETVRHVELTSGHVHRGMEAMATQRNLVKNVTLTERVCSLCSNSHSFTYSMVVENVLGITIPDRARYLRVVAEEIKRIASHLFNTAIQAHIIGFKSLFMHVMEVREMMQDLKETVYGNRMNLAANCIGGVKYNVNAELLDYMRKMLDKVEPQVDEIREIYDTNSMVLARTKGLGVLPKEDAIRLGVVGPVARGSGLQLDVRKDSPYAAYPDVEFKTIVEQSGCIHARTMVRMHEVLESFSIIRQCIARMPEGEVTAPMRQIRTAEACARSEAPRGEVFYYIRTNETDIPSRLKWRVPSYMNWEALGVMMRDCKVADVALITNSIDPCVSCTER	[NiFe] Group 4c	[NiFe] Group 4c	Evolving	Sensitive	7	[NiFe]-centre, 1 x [4Fe4S] clusters	NuoL, NuoH, NuoC, [FeS] protein, polyferredoxin	0.404712	0.0943826	0	0	0	0	0	0	1.72832	0.913421	0	3.79621	0	0	0	0	0	3.2323	0	0	0	0.281543	4.04317	0	0	0	0	0	0	0	0	0	0	0	0	0	0	0	0	0	0
WP_006859957.1	MRGVETRIREIRHRIFREVARMAYHTEWSVEKRIEELPYEIIPGEVGNFRNDVFLERAIVGERLRLAMGLPYRSAAEHAPLSDNISAADKAETYYTPPLINIIKFACNACHEKRVFVTDGCRGCLAHPCVEVCPKGAVTLERTNGRSVIDQDKCIKCGRCADVCSYHAIIVQERPCAAACGMDAIHTDANGKADIDYEKCVSCGMCLVNCPFGAIADKSQIFQVIRAIQTGERVYAAVAPAFVGQFGPKVTPGRLRAAMKELGFADVFEVAIGADICAVQEAEDFVNEVPEKLPFMATSCCPAWSTMAKKLFPKHANCVSMALTPMTLTARLIKNQNERAKVVFIGPCAAKKLEAMRSDIRSDVDFVLTFEEMAGIFDAKHIDIETIPEDPEGVNDAST…	[FeFe] Group B	[FeFe] Group B	Evolving	Labile	1	[FeFe]-centre, 2 x [4Fe4S] clusters	None	37.5833	29.0418	26.001	24.427	21.7175	28.0875	20.2519	25.4642	23.0442	19.1818	26.4918	32.2678	66.395	54.1931	12.8753	22.617	34.495	53.0097	70.6058	55.2769	57.8419	28.4359	20.2159	58.2667	46.1037	29.0553	61.9318	38.317	28.3677	40.3249	37.2704	39.3026	28.8051	63.1999	72.6196	62.4737	46.8548	20.7571	28.1319	27.6081	56.9077
WP_027399701.1	MGKRTIIPFGPQHPVLPEPVHLDLVIEDETVVEAIPSIGFIHRGLEKLVEKKEYTEMVYVIERICGICSFGHGWGYCLSVEGVMGVEIPERANYLRTIWHELSRMHSHLLWLGLLADGFGFESLFMHCWRIREKVLDIFEKTTGGRVIFSVCKVGGVRKDIDEATLKEISSVVDGMKKELKELADVFLEDYSVKNRLCGVGYLSKEDAAELAAVGPMARASGLKQDMRLLGHGVYDKLGFEPCIETAGDSYARCKVRIREVFQSIDLIIKAIEMIPDGDISVPVKGNVPANECVVRLEQPRGEAFYYAKGADSKFLERMRVRTPTNQNIPAMVKTLQGCDLADVPMLILTIDPCISCTER	[NiFe] Group 4e	[NiFe] Group 4e	Evolving	Sensitive	6	[NiFe]-centre, 1 x [4Fe4S] clusters	NuoL, NuoH, NuoC, [FeS] protein	2.89232	2.007	6.04674	1.80941	6.20501	5.73215	0.613694	3.18302	10.3699	8.22079	1.82702	1.89811	7.09072	0	1.35529	0	0	0.646459	0	0	1.15684	1.83003	5.3909	2.08095	0.928262	3.37852	0.967684	6.23765	4.40189	2.01625	1.8034	4.51014	1.15221	4.73999	2.68962	2.79733	3.65102	2.9653	6.49198	3.68107	0
WP_005600915.1	MLADKNILHFKHEILYQVARLAFEGNLEEGRDALPYELVKGPKPQFYCCIYKEREIIRQRIRLAEGKAPGAYDDGNIIQVITAACEDCPISSYTVTDNCQNCPGKACINACKFGAISTGEHHSKIDGSKCKECGMCAKACPYNAIAHLKRPCKFSCPVDAITYDEYGISVIDEKKCIRCGQCIHKCPFGAIGSKTFIVDVINAIKSDRPVYAMVAPAAEGQFGKDITMASWRDAMKEVGFTDMFEVGAGADMTTMSEAEEWAEAYEKGEKKTTSCCPSFVNMIKNFYPELSDKVSETVSPMCMLSRAIKAKYPEAVTVFIGPCIAKKSEIVDQKIEGNADYALAFSEIRAIMKAKNVVLKPSDNTYQGASVFGKKYANVGGVSSSVLEYMKETGKEISP…	[FeFe] Group B	[FeFe] Group B	Evolving	Labile	1	[FeFe]-centre, 3 x [4Fe4S] clusters, 1 x [2Fe2S] cluster	None	38.2683	28.5815	45.3505	27.1411	13.9613	21.7822	24.5477	33.4217	16.7071	6.39394	26.4918	55.0451	9.02456	18.0644	79.9623	81.0443	57.4916	26.5048	44.1286	96.7346	58.4203	16.8926	29.6499	47.8619	12.6863	27.7039	36.772	36.5348	49.888	45.7016	25.6484	41.8798	9.21764	89.5332	69.93	71.7982	50.5058	33.6068	19.4759	29.4486	25.7003
WP_021739983.1	MVNLTINNKKIQVPEGTTILAAAAQAGIKIPTLCYLKEINEIGACRVCVVEVEGKETLVASCNTAVEEGMVVYTNSYKAQHARRMNVQLILSEHDAHCASCLRSGNCTLQSVANDLNIGDVPFGEKYEQNEWSQDFPLIRDASKCIKCMRCVQICDKVQELKIWDVINTGKRTSVGVSGRKQITESDCAVCGQCITHCPVGALHERDDIDKLMDAVHDPEKIVVVQIAPAVRSAWGEGIGLSREMATEKRMAAAVRALGVDYVFDTNFSADLTIMEEGNEFLERMTHADEYSWPMFTSCCPGWVRFVKSQYPDMVKNLSTAKSPQQMFGAVAKSYYAQILDVDPSRIFSVSIMPCVAKKHECAIPVMNDAGAGQDVDISLTTRELDRVLKAELISPAFL…	[FeFe] Group A2	[FeFe] Group A2	Evolving	Labile	2	[FeFe]-centre, 3 x [4Fe4S] clusters, 1 x [2Fe2S] cluster	NADH-dependent glutamate synthase	22.5992	16.515	18.7449	32.5693	9.30752	25.2215	21.4793	17.5066	35.1424	10.961	28.3188	18.9811	13.5368	21.0751	10.8423	18.2193	19.1639	22.6261	28.2423	15.7934	43.9598	15.4849	17.5204	45.781	30.6327	17.5683	18.386	7.12874	24.944	66.5361	32.2609	35.4368	13.8265	36.8666	24.2065	25.176	32.2507	3.95374	16.2299	11.6567	29.3717
WP_010939059.1	MNAFINGKEVRCEPGRTILEAARENGHFIPTLCELADIGHAPGTCRVCLVEIWRDKEAGPQIVTSCTTPVEEGMRIFTRTPEVRRMQRLQVELLLADHDHDCAACARHGDCELQDVAQFVGLTGTRHHFPDYARSRTRDVSSPSVVRDMGKCIRCLRCVAVCRNVQGVDALVVTGNGIGTEIGLRHNRSQSASDCVGCGQCTLVCPVGALAGRDDVERVIDYLYDPEIVTVFQFAPAVRVGLGEEFGLPPGSSVEGQVPTALRLLGADVVLDTNFAADLVIMEEGTELLQRLRGGAKLPLFTSCCPGWVNFAEKHLPDILPHVSTTRSPQQCLGALAKTYLARTMNVAPERMRVVSLMPCTAKKEEAARPEFRRDGVRDVDAVLTTREFARLLRREGID…	[FeFe] Group A2	[FeFe] Group A2	Evolving	Labile	2	[FeFe]-centre, 3 x [4Fe4S] clusters, 1 x [2Fe2S] cluster	NADH-dependent glutamate synthase	0.91902	0.481489	1.81402	0	3.10251	0.573215	0	0	0.576106	1.82684	0	0	0	0	0.677647	0	0	0	1.76515	0	2.31368	0.281543	2.69545	16.6476	3.40363	0.675704	0	0	0	0	0.200378	0.644305	2.30441	0	0	0	0	1.97687	1.082	0	0.917866
WP_006444067.1	MKYMTINNRKVAFEDEKNVLSVIRKSGIDLPTFCYHSELSTYGACRMCVVEDDRGRVFASCSETPREGMVIYTNTPRLQHHRKMILELLLASHCRDCTTCRKNGVCTLQKLAQQLGVSYVRFENNKPQLPLDESSDCIVRDPNKCILCGDCVRTCDEIQGLGVLDFAFRGARMQVMPAFNKDLAKTDCVGCGQCRAVCPTGAITIKQNIRPVWEAVADPDTRVVVQIAPAVRVAVGDKFGIPKGENSLGKLAAALRRMGFDEIYDTNFGADLTVMEESEELLERLDSGENLPLFTSCCPGWVKFCENKYPDLREHISTCRSPQQMFGAVLKEEARMDKEDKRKTVVVSIMPCTAKKAEIHRPEHRTDGEQDVDYVLTTTEVTRMIKEAGIDLAQMPSEA…	[FeFe] Group A3	[FeFe] Group A3	Bifurcating	Labile	3	[FeFe]-centre, 3 x [4Fe4S] clusters, 1 x [2Fe2S] cluster	NADH dehydrogenase, thioredoxin	36.3866	27.6355	44.1412	19.9035	31.0251	44.7108	50.9366	22.2811	40.9035	11.8745	14.6161	28.4716	211.433	15.0536	23.04	20.104	38.3277	29.7371	40.5984	29.6126	37.0188	36.6006	13.4772	83.2381	11.758	72.976	50.3196	60.5943	30.3241	49.7341	8.21551	34.7925	21.8919	4.21333	61.8612	56.8791	24.9486	34.5952	39.4929	33.1297	41.304
WP_014357048.1	MKEITFKINGQEMIVPEGTTILEAARMNNIDIPTLCYLKDINEIGACRMCLVEIAGARALQAACVYPVANGIEVLTNSPKVREARRVNLELILSNHNRECTTCIRSENCELQTLATDLGVSDIPFEGEKSGKLIDDLSTSVVRDESKCILCKRCVSVCRDVQSVAVLGTVGRGFTSQVQPVFNKSLADVGCINCGQCIINCPVGALKEKSDIQRVWDAIADPSKTVIVQTAPAVRAALGEEFGYPMGTSVTGKMAAALRRLGFDKVFDTDFGADVCIMEEGTELIGRVTNGGVLPMITSCSPGWIKFIETYYPEAIPHLSSCKSPQNITGALLKNHYAQTNNIDPKDMVVVSIMPCTAKKYEVQREELCTDGNADVDISITTRELARMIKEARILFNKL…	[FeFe] Group A3	[FeFe] Group A3	Bifurcating	Labile	4	[FeFe]-centre, 3 x [4Fe4S] clusters, 1 x [2Fe2S] cluster	NADH dehydrogenase, thioredoxin, thioredoxin	2.13532	1.37844	2.4187	1.80941	7.75626	5.73215	4.90955	3.18302	1.15221	1.82684	4.56754	0	1.93383	0	2.71059	0.62825	0	2.58584	0	0	0	0.985402	4.04317	0	3.40363	6.08133	2.90305	0	1.4673	1.34416	0.400756	3.86583	2.30441	0.526666	0	3.72977	1.21701	4.94217	0	5.52161	0
WP_019262598.1	MDEKIPNSKIIETEIPMGTVHPAALEPYRVRLFVEDEIVQEAEITIGVNHRGVERIMEGLPVEKANALTEKICGICSNAHVWNSVRTAELGLDIEIPERASYIRIIVGELERLHSHFLYLAHGCEVLAHETFSMRVFYLREIVMELLNMIGGNRVQYGCSVIGGVRPRCELDSKRLERLANDMNALEEGLTDFVNRFTSDSILMSRITGIGVLPQKQAIKLDVSGPSLRATGVVYDLRTTMSEYDPFDFNIITQEDGDVKSNLMMRALESFESIKIIRQAVKNLPEGPVVTHDWEMKDTDIIESRIEVPRGTLYHSYALESGRVRHSIIRTPSMANIGAMQYACIGDQITDAQLCIVQCDPCFTCTDRAIEIIRR	[NiFe] Group 4d	[NiFe] Group 4i	Evolving	Sensitive	16	[NiFe]-centre, 1 x [4Fe4S] clusters	NuoH, NuoL, polyferredoxin, nine TM proteins, two hypotheticals	19.0146	14.6923	0	22.6176	17.0638	0	0	0	12.6743	68.5065	0	0	0	0	89.4494	0	0	0	0	0	0	0	0	0	37.7493	49.3264	22.2567	16.9308	79.723	0	0	0	46.0882	0	0	0	0	287.634	0	173.01	0
WP_028085756.1	MMRGINTTVRRLRRKVFEEVAALGFKADADTLCDDMEAIPYALVNDETEQYRDSVYRARAVVREQVRLAMGLSLRPEDKPVHLTAGVEASNISDKYYEPPLMQVIPSACMRCEAKGYEVSNMCKGCLAHPCMEVCPKGAISMVNGKSHIDQEKCIKCGKCKSVCPYDAISKKERPCAKACGVNAIESDKMGRAYVNPDKCVSCGMCMVSCPFGAISDKSQIFQLARALSEGEQIIAEIAPAFTGQFGDNINARNLKAALEELGFSQVYEVALGADIGAVAEAHHYVEKVATGELPFLLTSCCPSWAMLAKKYFPDMIDEVSQELTPMVATARTIKKEHPNAKVVFIGPCAAKKLEAMRRTVRSDVDFVVTFEELQGMFDAKGIDLSEYEAESSFHNATG…	[FeFe] Group B	[FeFe] Group B	Evolving	Labile	1	[FeFe]-centre, 2 x [4Fe4S] clusters	None	115.063	90.6586	65.3048	54.2822	29.4738	121.522	123.966	114.589	120.982	38.3637	154.383	81.6185	197.251	138.494	79.9623	89.8398	53.6588	91.1508	61.7801	118.451	136.507	57.7164	36.3886	68.6715	84.4719	122.302	107.413	177.328	100.265	94.7636	76.7449	371.12	157.852	302.833	141.205	204.205	217.844	164.08	159.053	73.6215	168.887
WP_019263574.1	MKVAILGAGCYRTHAASGITNFTRACEVAEETGKEKFAMTHSTIEMGAELLHLAGVDEVVVSDPVFDNDFTVVDDFDFQEVIAAHKAGKAEDVMPDIRAKVNELAESLPTPPKAAIHFVDPEDLGMKTMNDDAAAVADADWVMTWLPEGGMQKPIIEKFAGELKEGAILTHACTIPTTEFKNIFDECGANVNVASYHPGAVPEMKGQAYIGEGYADEASIKTLLELGEKARGSAFTLPANLLGPVCDMCSAVTAITYAGILAYRDTVTQILGAPAGFAQMMANEALTQVTALMQDEGIDKMDEALNPGALLGTADSMNFGPLAEIVPTVLENLEKRS	Hmd	[Fe]	Bidirectional	Tolerant	1	Fe ion	None	15.8751	11.8623	0	19.9035	41.8838	0	0	0	6.91327	75.8139	0	0	0	0	71.8305	0	0	0	0	0	0	0	0	0	34.3457	34.4609	19.3537	17.8219	62.1155	0.672082	0	0	13.8265	0	1.34481	0	0	228.328	0	125.157	0
WP_013979648.1	MTRSVIDPITRIEGHLRVEMEVTNGKVSDAWVSGGCFRGMEMVVENRTPEDAAQIVQRICGVCPVSHAHSSTIAAEKAYGIQISNNARIIRNLIEGAQFLHSHILWFYNLAALDYVNPLNALEADPMDAIDLAKSVGTSVNSDFVALQDRLKTFASNGQLSIFSGNWFDAEDGTGYTLLPELDLICTAHYLEALSMQAKASQISALLGGKMPHVMTIVPGGTAFVPTAQKLDDLKYLVDEIYNWVEATMIPDTLAIAPFYMDALNWGKGCGRYVAWGVFEGAGEYSDYTEQMKNRYLPMGVLDDNLNISDVQENLITEYVGHSWYKGEETYTSPYYTTEPEYTTYDVNDRYTWCKCPAYDGKCYEAGGLSRVLAAYKRNVPFVVDQVNGLLEALGAPGQ…	[NiFe] Group 1a	[NiFe] Group 1i	Anaerobic Uptake	Sensitive	3	[NiFe]-centre, 3 x [4Fe4S] clusters	Cytochrome b	2.11879	1.50624	0.604674	1.80941	0	2.86607	11.0465	0	4.60884	1.82684	1.82702	0	4.51228	0	0.677647	0	0	0	0	0	0	7.32013	2.69545	2.08095	0	3.37852	0	0.891093	4.89098	0.672082	0.200378	0.644305	1.15221	0	0	0	0	5.93061	5.95098	4.9081	19.2752
WP_013979953.1	MVKLSIDGRETSASEGSTILDAAAGLGIKIPTLCALKDLNIIGSCRVCLVQVEGEEAPCAACSTPVREGMEVRTDTPQVAAMRRANVEALLDSHRSECTSCARVDTCALRKLAADFAVGESTCDMPAKGAWNEDFPLIRDSSKCIKCMRCVAFCEKVQHCAVWEPSGSGTGASVAVKDGLDISEAGCALCGQCITHCPTGALTARSDIDKVLDALLDPEVMTVVQVAPAVRAAWGEGVKLSREQATPGRMASALRALGFDRVFDTDFAADLTIMEEGSEFLEFVKSDKPRPMFTSCCPGWVRFAKLHHPEIVPQLSSAKSPHQMMGALVKNTLREAAEAGGKKRIFCVSVMPCVAKKYECDVPELSTEGGRDVDAVLTVREFDRMLRMFSVDCAALEET…	[FeFe] Group A2	[FeFe] Group A2	Evolving	Labile	2	[FeFe]-centre, 3 x [4Fe4S] clusters, 1 x [2Fe2S] cluster	NADH-dependent glutamate synthase	1.27058	0.983551	0	0	1.55125	1.14643	1.22739	0	0.576106	0.913421	0.913509	0	2.57845	0	0.677647	0	3.83277	0.646459	0	0	1.15684	1.26695	6.73862	0	5.26015	2.02711	0	0.891093	0.978197	1.34416	0	5.79875	0	1.05333	1.34481	0	0	1.97687	3.78699	0.613512	2.7536
WP_012798463.1	MGKATVIPFGPQHPVLPEPLHLDLVVQDEKVIEVIPQIGFIHRGLEKLVEKKDIHQFIYVAERICGICSFGHSLGYAETVEKLMGVEVPRRAEYLRVILHELSRIHSHLLWLGLAADAFGFEALFMHSWRIRERVLDIFEATTGGRVILSAVQIGGVIRDIDDEELKQISATLDGMRSEYAELMATFLNDTSVRSRLVNVGRLTQTQAEDLCMVGPFARASNVKFDCRMLGNGAYGELENFQPILDDEGDCYARVRVRCKEVIQSIDIIQELIAKIPHDGIGERSKLTPPDGAQAANVLEQPRGECYYYARGNGSKNLERMRMRTPTSQNLAGLVAACEGAELADVPNILLTIDPCISCTER	[NiFe] Group 4e	[NiFe] Group 4e	Evolving	Sensitive	6	[NiFe]-centre, 1 x [4Fe4S] clusters	NuoL, NuoH, NuoC, [FeS] protein	0.531346	0.352995	0	0	0	0	0	0	2.30442	0	0	0	0	0	0	0	0	0	0	0	0	0.281543	1.34772	0	0	6.75704	0	0	0	0	0	0	0	0	0	0	0	0	5.95098	0	5.5072
WP_005027974.1	MAEATQTKTTIAIDPVTRIEGHLKAEVVVENGKVVDAKLTGGMYRGFESILRGRHPRDAAQIVQRICGVCPTAHATAASIALEKASGTAVPSNGRATRNLILGANYLQSHILHFYHLAGQDFIQGPDTAPFMPRYAKPDLRLPPAINAVGVDQYVEALEVRAVCHEMVALFGGRMPHVHGILAGGAAEIPTKEKLVEYAARFKKVRKFVEEKYLPVVYLVGSQYKDLGAFGQGYRNALCVGVFPLDDEGKEFVFKAGAYQDGKDMPFDVKRVTEDVKFSWFADSTSGKPFTKGENVLEVDKKGAYSFVKAPLYNGKPMEVGPLARMWVNNKPISPIGQKLFKEYFGLDVKNFRDMGEDLAFSLLGRHVARAEESYLMLDVVERFLKEVRPDEETFSMPV…	[NiFe] Group 1a	[NiFe] Group 1a	Anaerobic Uptake	Sensitive	3	[NiFe]-centre, 3 x [4Fe4S] clusters	Cytochrome	0.376636	0.108712	0	3.61881	1.55125	0	0	0	0	0	1.82702	1.89811	0.644611	0	0	0	0	0	0	0	0	0.281543	0	0	0	0.675704	0	0	0	0	0.200378	0.644305	0	0	0	0	0	0	0	0.613512	0
WP_009165839.1	MVNVVIDGKRIKVPERTTILDAAKAAGIRIPTLCFLEGVNEIGACRVCVVEVEGHERLFTACNNPVEESMVIHTNSKKAREARRANVRMILSEHDDHCPSCVRSGNCELQRIANELNIHDTPFEKHYVSRRTSPDFPLIRDFSLCIKCMRCVQVCDKIQHANVWDVVNTGAKTTVDVARVYRLEDADCALCGQCITHCPVGALHERDDTQKVLDAIDDPEKIVLVQIAPAIRTAWGEEFGMKPGEATVTRLAAALRLVGFDYVFDTNFSADLTIMEEGSEFVERLKHRDREKFPMFTSCCPGWIRFVKSHWPQFVGQLSSAKSPQQMFGAVAKSWYAQTLGVDPSRIFSVSIMPCLAKKAECALPGMDGAGAGQDVDVALTTREVSRLIRSLQIQPQDL…	[FeFe] Group A2	[FeFe] Group A2	Evolving	Labile	2	[FeFe]-centre, 3 x [4Fe4S] clusters, 1 x [2Fe2S] cluster	NADH-dependent glutamate synthase	4.06222	2.9651	1.81402	11.7611	0	0.573215	3.06847	1.59151	6.91327	0	4.56754	5.69432	3.86767	3.01073	5.42117	0	0	12.9292	0	0	1.15684	3.80084	14.825	6.24286	11.758	9.45985	3.87074	5.34656	2.93459	4.70457	10.4197	7.73166	2.30441	10.5333	5.37923	2.79733	0.608504	2.9653	2.70499	4.9081	0.917866
WP_014904712.1	MTTYDEIFKRLVKASYNDKLEQEIREIEASGNEATKKYVYYALGNGEQNKVVFQINDCKGECTSEKHNCETSCIFNAIVRDMEGKVVIQDRSCIHCGHCIDTCSLNNLIDKKEFIPLIDLLRKKEVAVYAIVAPAIIGQFGDRVTMGQLRAAFKQLGFYGMVEVALFADILSLKEALEFDRAVNSEEDFVLTSCCCPIWVGMVKRVYNQLIPHIQPSVSPMVACGRGIKRLHPEAKVVFIGPCIAKKAEAKEADIQDAIDAVLTFEEVKQIFEATGVNPEDMEDITSGHSSSAGRIYARTGGVSKAISDTLDQLRPDKLIRIKAVQAEGIQECKEILRSINQGDIKANFYEGMGCVGGCVGGPKALLKSELGTLHVNTYGLLADARTPLHNPYIRELLD…	[FeFe] Group B	[FeFe] Group B	Evolving	Labile	1	[FeFe]-centre, 2 x [4Fe4S] clusters	None	0.535837	0.296098	0	2.71411	0	4.58572	0	0	0.576106	0	0	0	0	0	0.677647	0	0	0	0	0	0	0.140772	0	0	0	0	1.93537	4.45547	1.95639	0	0	0	0	0	1.34481	0.932444	0	0	0.540998	0	0
WP_006905160.1	MVKNDQNINSLKHHIMEEIARLAWADQLTPENEEKVTYEISPGPKAKYRCCVYKEREIVRERIRLAKGLCPSPNRESNNIIQVIDPACDDCAMQTYTVTDNCRFCLGKACINSCKFGAISEGDLRMHIDPAKCKECGQCAKNCPYEAIVHLTRPCKRACPVGAITFDEYGFCKIDEEKCVSCGHCIHSCPFGAIGSKTYLVQIIKAIKAGKEVIAMCAPATEGQFGEEITMASLRNALKEIGFSDMVEVGLGGDMTAAYEALEWSEARKEGRKMTTSCCPAFIRMLQKHFPDQYKENMSSTVSPMTAVSRYLKATHPGCVTVFIGPCIAKKAESQDTSVPDTADWVISYGEFRALLRSKGVEPKPVDDPYQEASIWGKRFASSGGVANAVIECMKERGE…	[FeFe] Group B	[FeFe] Group B	Evolving	Labile	1	[FeFe]-centre, 3 x [4Fe4S] clusters, 1 x [2Fe2S] cluster	None	0.922587	1.04522	0	2.71411	0	0	0.613694	1.59151	4.03274	0	1.82702	0	3.22306	0	2.03294	0	0	1.29292	1.76515	3.94835	0	1.12617	0	0	0.309421	0	1.93537	0.891093	0	0.672082	0.200378	0	1.15221	0	1.34481	0	0.608504	0	0	0.613512	0
WP_009132358.1	MEEKQITLQIDRHYITVPEGSTILEAARKIGIDIPTLCHIDLKGTCVKNNPASCRICVVEVEGRRNLAPACATRCTEGMVVRTSTLRVMNARKVVAELILSDHPNDCLTCPKCGDCELQTLALRFNIRRMPYNGGELSPRKREVTSSIVRNMDKCIFCRRCESVCNEVQTVGALGAIRRGFNTTIAPAFDKMMSDSECTYCGQCVAVCPVGALTERDHTNRLLLDLENPDKVVIVQTAPAVRAALGEEFGLPAGTLVTGKMVYALRELGFDYVFDTDFAADLTIMEEGAEILNRLTRYMNGDKSVRLPILTSCCPAWVNFFEHHFPDMLDIPSTARSPQQMFGSIAKTFWAEKMGIPREKLVVVSIMPCLAKKYECDRNEFKTDGSPDVDYSISTRELA…	[FeFe] Group A3	[FeFe] Group A3	Bifurcating	Labile	2	[FeFe]-centre, 3 x [4Fe4S] clusters, 1 x [2Fe2S] cluster	NADH dehydrogenase	0.453707	0.214589	0	0	0	0	0	0	0	0.913421	0	0	3.86767	0	0	0	0	0	1.76515	0	0	0.422315	0	0	0	0.675704	0	0	0	0	0	0	0	0	0	0	0	0	0	0	0
WP_010244148.1	MKTLTNQNRIKVTVNGREIEVYDNLTILQALLQEDIHIPHLCYDIRLERSNGNCGLCVVSIGPNGEKDVKACQTPIKEGMIICTNSPKLESYRKVRLEQLLSDHNADCVAPCVMTCPANVDIQTYLRHVGNGNYESAIRTIKDRNPFPVVCGRVCPHPCEAQCRRNLVDSPVAINYVKRFASDWDMSQPHPWVPTKSPSTGKKIAIVGAGPSGLSATYYSAIKGHDVTVFERQPHAGGMMRYGIPEYRLPKATLDKEIDIIKSLGVKVMTGKSLGIHIRLEDLHKDFDAVYLAIGSWNATPMHIEGEKLDGVWLGIQFLEQVTRNAEINLGNNVIVIGGGNTAIDCARTALRKGAKSVKLVYRRTQEEMPAEPYEVEEALHEGVEMLFLMAPTKITSEG…	[FeFe] Group A1	[FeFe] Group A1	Evolving	Labile	1	[FeFe]-centre, 3 x [4Fe4S] clusters, 1 x [2Fe2S] cluster	None	2.79615	2.03629	3.62804	2.71411	4.65376	6.30536	0	1.59151	0.576106	2.74026	2.74053	3.79621	5.15689	12.0429	3.38823	0.62825	0	1.93938	5.29544	0	1.73526	1.83003	0	4.16191	1.85652	0.675704	1.93537	9.80202	3.91279	2.01625	0.200378	1.93292	0	5.79332	0	5.59466	0	5.93061	1.082	2.45405	1.83573
WP_027399804.1	MSQNYMIINGEKVPYTDERNILEVVRKAGIDLPTFCYYSDLSIYGACRMCIVEDNRGGIITSCSTPPKNGMEIKTNTPKLHKHRKLILKLLLSSHCRECTTCSKSGDCRLQDLARRFGIQQIKFDKTQKAYKDEYTIDRSSPSITRDPNKCIQCGDCVRMCSENQNVGAIDFALRGYELMVCPAFDDPIAETDCVNCGQCAAVCPTAAIVVNNQVEEAWKAIYDKNKRVVVQIAPAVRVALGEEFDLPPGESVMPLIVAAMRKIGFDEIYDTSFSADLTVIEESNEFLEKLKSGAKLPLFTSCCPGWIKYVENRHPDLLPQISSCKSPMGMFSSVFKEYASKPENKMDDRETFVIAIMPCTAKKYEASREEFKTNGKVDGKYDTDLVLTTQELANMIWE…	[FeFe] Group A3	[FeFe] Group A3	Bifurcating	Labile	3	[FeFe]-centre, 3 x [4Fe4S] clusters, 1 x [2Fe2S] cluster	NADH dehydrogenase, thioredoxin	5.30926	3.85371	7.25609	1.80941	7.75626	2.29286	1.84108	4.77453	11.5221	3.65368	3.65404	3.79621	3.86767	6.02146	11.52	1.88475	7.66555	6.46459	0	0	12.1468	4.64547	5.3909	37.4572	14.2334	9.45985	8.70916	1.78219	6.35828	4.03249	2.00378	10.3089	2.30441	0	10.7585	1.86489	0.608504	5.93061	2.16399	1.84054	2.7536
WP_012282074.1	MMKRHLEEALLPHMLGWDPGEEHPEEHTKPSAFFGPKKVRLEIDGQLVEAEVGTTVLDAAREAGIHIPSLCYLREINEIGACRVCLVEVEGQRALQASCVYPVAEGLKVRTHSPRVRKARRRVVELILSDHQRECTTCIRNLNCELQNIAEDLGIRRIEFQGESRRQPIKDNNPSIRHDLNKCVHCRRCESICAKVQENHVIAAQERGFDTIIAPAFNADMGDVACIMCGQCVLACPVGALTEKESIDDVWKALADPTTHVVVQAAPSIQVTLGEAFGLPVGTKVTGKLVAALRRLGFNQVLATDFAADLTIVEEAYEFLGRYEEGKTPFFTSCCPAWIKLVEHYFPKYIPNLSTCKSPMAMFGALTRAHYPTERGLPPEKVVSVAVMPCTAKKYEAAR…	[FeFe] Group A3	[FeFe] Group A3	Bifurcating	Labile	3	[FeFe]-centre, 3 x [4Fe4S] clusters, 1 x [2Fe2S] cluster	NADH dehydrogenase, thioredoxin	0.561407	0.774373	0.604674	0	1.55125	1.71964	0	0	1.72832	0	2.74053	0	0	0	0.677647	0	0	0	3.53029	0	0	0.422315	1.34772	0	1.85652	0.675704	0.967684	0	0	0	0	0.644305	0	0	0	0	0	0	0	1.84054	0.917866
WP_022739022.1	MTTKKQSPLRVGETHVQAVRDTFPGAVLDATWQAADQVTITVPTDMLPDVVEFLYYGRGGWLPNMVANDERPLHGCYALYYLLSMEESDPGFVVVRAEVDPHSMEYPSVTPRVPACVWSEREAFDMFGLRAVGLPDERRLVLPDDWPCDLYPLRKDSMDYRKRPAPVTDVENYSFLYEGHAEETTEVPMGPLHITSDEPGHFRLFVEGEDIIDADYRLFYVHRGMEKVAESRLNYDAVTFLADRICGICGNAHSVAYAEAVEHAQGIEVPVRAQYIRSILLEVERLHSHLLNLGLVCHYCGFDTGFQHFFRVREKTMDLAVLLTGARKTYGLNLIGGVRRDILDEQKLATIKYVRELRHEVEALVDMLVSTANFESRTAGIGRLDPAVARDFSPVGPCV…	[NiFe] Group 4a	[NiFe] Group 4a	Evolving	Sensitive	6 or 9	[NiFe]-centre, 1 x [4Fe4S] clusters	NuoL, NuoH, two [FeS] proteins, (three antiporter subunits)	7.51378	5.62373	39.3038	0	3.10251	38.9786	0	0	0.576106	0	10.0486	0	0	0	2.03294	0.62825	0	0	60.015	0	0.578419	12.5287	0	0	0	11.487	30.9659	0.891093	0	18.1462	0	11.5975	0	0	0	0	24.3401	23.7224	8.65597	1.22702	0
WP_003519061.1	MDNREYMLIDGIPVEINGEKNLLELIRKAGIKLPTFCYHSELSVYGACRMCMVENEWGGLDAACSTPPRAGMSIKTNTERLQKYRKMILELLLANHCRDCTTCNNNGKCKLQDLAMRYNISHIRFPNTASNPDVDDSSLCITRDRSKCILCGDCVRVCNEVQNVGAIDFAYRGSKMTISTVFDKPIFESNCVGCGQCALACPTGAIVVKDDTQKVWKEIYDKNTRVSVQIAPAVRVALGKELGLNDGENAIGKIVAALRRMGFDDIFDTSTGADLTVLEESAELLRRIREGKNDMPLFTSCCPAWVNYCEKFYPELLPHVSTCRSPMQMFASIIKEEYSTSSKRLVHVAVMPCTAKKFEAARKEFKVNGVPNVDYVLTTQELVRMIKESGIVFSELEPE…	[FeFe] Group A3	[FeFe] Group A3	Bifurcating	Labile	3	[FeFe]-centre, 3 x [4Fe4S] clusters, 1 x [2Fe2S] cluster	NADH dehydrogenase, thioredoxin	3.9416	5.55508	3.62804	2.71411	15.5125	4.0125	2.45477	6.36604	1.72832	9.13421	9.13509	3.79621	5.15689	3.01073	3.38823	2.513	0	9.05043	5.29544	0	0.578419	12.2471	6.73862	4.16191	1.23768	4.05422	0.967684	1.78219	5.86918	2.68833	3.00567	2.57722	0	2.10666	4.03442	3.72977	3.04252	9.88435	0.540998	6.74863	8.2608
WP_006362914.1	MNVVNIKLNGYDYAMEKGMTVLDASFETMKFKKEYLNHPIPTLYYLQGIVDVDESGVCVAEVDGKLVNASTTRIGEGMEIETMSPKAVEARKEALSRILAVHDKDCLHCLRSSSCELQTLLKDYGFTDEPDIPDDNIEEIDTSSVVLIRDNNKCIRCKRCVNVCAKMQAVSAIACTGTGLDATIAPSSPSGLAAASCVNCGQCVAVCPVGALVEKTCIDEVNAALADPKKYVAVQVAPAVRAALGEDFEFPLGIDVEGRIAEGLRLLGFDKVFDTKFGADLTIVEEANELVDRIAHDGVLPMITSCCPGWIKYAEHFYPDMLDNISSCKSPHQMHGAIVKSFLAEREGLDKEDIVTVSVMPCTAKKFECTRNDEDGAGVPDVDIVVTTNELAKMFKDAG…	[FeFe] Group A1	[FeFe] Group A1	Evolving	Labile	1	[FeFe]-centre, 2 x [4Fe4S] clusters	None	8.3896	6.45347	1.20935	13.5705	6.20501	8.59822	5.52324	7.95755	13.2504	0.913421	7.30807	1.89811	0	0	5.42117	5.026	3.83277	0.646459	3.53029	3.94835	52.6361	4.50469	5.3909	24.9714	0.618842	4.72993	13.5476	0.891093	6.84738	30.2437	10.0189	16.7519	4.60882	21.0666	0	13.0542	0	0.988435	8.65597	1.22702	11.0144
WP_015529112.1	MGLSLRPENKPVHLTAGVEASNISEKYYEPPLMQVIPSGCESCEENKYEVSNVCKGCLAHPCQEVCPRGAISMVNGKSFIDQDKCIKCGKCKSVCPYDAIAKKERPCKKACGVNAITSDKLGRAYIDADKCVSCGMCMVSCPFGAISDKSQIFQLARALSEGEEIVAEVAPAFVGQFGPNINVRNFKAALEELGFSETYEVALGADIGAIAEAHHYVNKVTTGELPFLLTSCCPSWAMLAKKFFPDLIDQISQELTPMVATARTIKQEHPNAKVVFIGPCAAKKLEASRRTVRSDVDFVVTFEELQAMFDAKGIDLTAYEAESSFHDATGAGRGYACAGGVAKAIEECINEYYPGTQVNIEHAEGLAECKKILTLAKAGRMNGCLIEGMGCPGGCIAGA…	[FeFe] Group B	[FeFe] Group B	Evolving	Labile	1	[FeFe]-centre, 2 x [4Fe4S] clusters	None	64.0551	54.0568	40.5132	57.901	35.6788	72.7983	50.3229	36.6047	102.547	62.1126	71.2537	45.5545	53.5027	87.3111	32.527	78.5313	30.6622	45.2521	40.5984	92.7862	71.1455	55.0417	22.9113	89.481	24.4442	59.4619	85.1562	147.921	48.4207	59.1432	20.8393	45.7457	72.589	168.533	76.6541	59.6764	77.8885	30.6415	82.7727	45.3999	130.337
WP_013907125.1	MSATEKVSTFRPTPEARTGGGTYLPGELRGIIRINQNKCVGCDTCKQFCVAHAIRGSIGVAHSIDTDRCINCGQCLVNCPFGAIEQMSFVDEVEEKLRDPEWTVVAIIAPAVRVALAEEFGSPSGTLTVGRMHNAFKKIGFKIYENNFAADQTIMEEAYEFIAKVRYWVLGERGPELEKFAHHPLPHFTSCCPAWIRYAELYYAKVLPHISGAKSPQQMAGASAKTWAALDVWNVDPRKVYTVGIMPCTGKIFEASRPEFKSAWQWLKENGYLPEDTPPFPDVDAVLTTRDAATLLKRFGVNPLKLSEKEENIEITEIYSGGATIFGTSGGVTEAALRTAYYVLSGKEPPAWDFFAVRGYTTGIREAVIPIPLKALGGKEFHLKICVVNGAINHLDKVL…	[FeFe] Group A1	[FeFe] Group A1	Evolving	Labile	3	[FeFe]-centre, 2 x [4Fe4S] clusters	Small subunit, cytochrome b	5.20206	3.97248	1.81402	1.80941	1.55125	2.29286	3.68216	1.59151	2.30442	1.82684	4.56754	7.59242	3.22306	15.0536	4.74353	6.2825	0	1.29292	7.06058	13.8192	4.62735	4.78624	5.3909	2.08095	7.73552	3.37852	8.70916	11.5842	12.2275	4.70457	4.40832	0	3.45662	1.58	16.1377	3.72977	0.608504	4.94217	3.24599	3.68107	7.34293
WP_025867773.1	METKEVTLQIDRHSITVPVGTTILEAATEIGINIPTLCHIDLKGTCIKNNPASCRICVVEVEGRKNLAPACATKCTEGMTVRTSTLRVMNARKIVAELILSDHPNDCLTCPKSGNCELQNLALRFNVREMPFTGGELSLRKREVTSSIVRNMDKCIFCRRCESVCNDVQTVGALGAVRRGFNTTIAPAFDKKMSESECTYCGQCVAVCPVGALTERDHTNRLLEDLDDPDKVVIVQTAPAVRVALGEEFGLPAGTPVTGKMVYALRELGFNYVFDTDFAADLTIMEEGTEVLDRLTRFLNGDKNVCLPILTSCCPAWVNFFEHHFPDLLNIPSTARSPQQMFGSIAKTYWAEKMGIPREKLVVVSIMPCLAKKYECDREEFKVNGNPDVDYSISTRELA…	[FeFe] Group A3	[FeFe] Group A3	Bifurcating	Labile	2	[FeFe]-centre, 3 x [4Fe4S] clusters, 1 x [2Fe2S] cluster	NADH dehydrogenase	0.483113	0.558188	0	0	0	0	0	0	0	1.82684	0	0	0	0	0	0	0	0	0	0	0	0	0	0	1.23768	0	0	0	0	0	0	0	0	4.73999	0	0	0	0	0	4.29459	0
WP_027207458.1	MRGIYTSVNDIRKRVFTEVARLSYNYKDGDLSEMEMIPYRIIPGEESKYRESVFLERAIVKERMRLAMGLSLRSAAEHAPVSTGAEECVKPEKYYQPPLINIIKFACNKCPDNVVTVSNQCQACLAHPCHEVCPRDAIKFDHGKSVIDQEKCIKCGRCIEVCPYNAIIRMERPCSKACGVKAIGTDEHGRADIDYDKCVSCGMCLANCPFGAIADKAQIFQTIQAIKSDTPVYAAIAPAIVGQFGPDLTLDKMRYAFKALGFEDAVEVAIGADLCTLQEADDFIKEVPEKLPFMGTSCCPAWSAMAKRDFPEQANCISMALTPMVLTGRLLKQQHPDCKIAFIGPCAAKKLEAMRKSVRSDIDFVLTFEEVMGMFEAKGVNFAEFETHNTMHGGSGDGR…	[FeFe] Group B	[FeFe] Group B	Evolving	Labile	1	[FeFe]-centre, 2 x [4Fe4S] clusters	None	35.6038	27.8679	16.3262	32.5693	21.7175	49.8697	60.7557	36.6047	42.0557	22.8355	28.3188	24.6754	76.0641	54.1931	34.56	3.14125	11.4983	61.4136	26.4772	17.7676	29.4994	19.708	22.9113	70.7524	16.3993	35.1366	22.2567	27.6239	40.1061	58.4711	21.6409	42.5241	31.1096	33.7066	41.689	27.9733	56.5908	63.2598	57.8868	18.4054	49.5648
WP_013656601.1	MSGQFMLIDGMPVEINGEKNILELIRKAGIELPTFCYYSELSVYGACRLCVIENQWGGIEASCSTPPKAGMEIYTNTPRLRKYRKMILELILANHCRDCTTCEKNGDCKLQELAMRFGINQVRFKNSKKEVPLDTSSRAIVRDESKCILCGDCVRMCDEMQNIGAIDFAHRGTNMRISTAFHKPISESKCVSCGQCAAVCPTGAIVVKNDTQAIWNVISDPETKVIVQIAPAVRVGIDQSLGEENGHNVMGKIIAALRRMGFDEIFDTTTGADLTVLEEANELLERIERKDTLPLFTSCCPAWVKYVENNHPELISQVSSCRSPMEMFGAVLKEHYSHSRRKVIVVAVMPCTAKKEEAARDELKRDGIPDVDYVLTTRELIQMVKESGIVFNELEPEAV…	[FeFe] Group A3	[FeFe] Group A3	Bifurcating	Labile	3	[FeFe]-centre, 3 x [4Fe4S] clusters, 1 x [2Fe2S] cluster	NADH dehydrogenase, thioredoxin	7.95135	6.22474	7.86076	10.8564	17.0638	21.209	8.59171	1.59151	4.03274	6.39394	10.0486	13.2867	5.8015	3.01073	9.48705	3.7695	11.4983	47.838	15.8863	0	2.31368	5.4901	4.04317	0	4.02247	5.40563	7.74147	6.23765	14.1839	0.672082	3.60681	6.44305	0	7.37332	6.72404	8.39199	18.8636	16.8034	2.70499	7.97566	0.917866
WP_026895808.1	MENKSQKEMVNIEIDGTKYSVPNDITVLEAARSVNIEIPSLCYLKEINEIGACRVCVVEIEGMKNLQASCVYPVREGLKIRTNTKKVLKARKSAVKLLLSNHHRECTTCIRNLNCELQNLADSLGIRNIPFTGEVQDYGYHDNNPAITRDYNKCINCRRCEAICSKIQECNVYSPINRGLDTIIAPAFQKDLADVSCIMCGQCIIACPTGSLTEKECINDVWTAIHDPEKHVVVQTAPSIQVTLGEMFGMPIGSFVGGKMVTALKRMGFDKIFATDVTADLTIMEEANELVERVIKNPTHLPLLSSCCPGWVKFAEHFYPEFLPNLSTTKSPHEMCGVLSKTWYAQKYNIPPKKIINVGIMPCTAKKYEAARPEMVSDGFRNVDYVLTTRELGRMIRQS…	[FeFe] Group A3	[FeFe] Group A3	Bifurcating	Labile	3	[FeFe]-centre, 3 x [4Fe4S] clusters, 1 x [2Fe2S] cluster	NADH dehydrogenase, thioredoxin	0.767024	0.532934	0	1.80941	1.55125	0	0.613694	3.18302	2.30442	0	1.82702	1.89811	0	0	0	0.62825	0	0.646459	5.29544	0	0	0.84463	0	0	0	0.675704	0	0.891093	2.44549	0	0.400756	0.644305	0	0	0	0	0.608504	6.91904	0	0.613512	0
WP_008862337.1	MTKRIVVDPITRIEGHLRMEADIENGVITDAFSTGTMIRGIEIIVKDRDPRDVWAYVGRVCGVCTSIHSLCSVRAVEDALHIVIPPNAEQVRNLMQSAVTIQDHVTHFYQLQALDWVDVMSALNADPRKAAEVAQSLSEWPKNSIGYFVEIQKKIRTFIETSKFSIFSNGYWGHPAYKLPPEVNLVALAHYLEALEVQKEIVKVQTIFGGKNPHPNFLVGGMACAVNINDPNALNMERLNYVAQIIERTQTFVRQVYLPDVLAILSYYPEWTKIGGGLHNYIAYGDYPMGNYGELSTYKSPRGIVVGRDLSKVVEFDPWAMDGLLEFVNNSWYSYTQGKDVGLHPSVGETHLNYTGATPPYEYLDRDQPYSWIKTPRYKGMPMETGPLARNIVGHASGN…	[NiFe] Group 1d	[NiFe] Group 1d	Aerobic Uptake	Tolerant	3	[NiFe]-centre, 1 x [4Fe3S] cluster, 1 x [3Fe4S] cluster, 1 x [4Fe4S] cluster	Cytochrome b	13.3771	10.4638	0	0	18.615	5.15893	7.97802	31.8302	13.2504	3.65368	10.9621	72.128	24.4952	0	0	1.2565	0	7.11105	0	0	0.578419	42.6538	45.8226	2.08095	0	26.3525	0	0	2.44549	12.0975	130.045	2.57722	3.45662	2.63333	5.37923	0	0	2.9653	0	32.5162	2.7536
WP_019554692.1	MLTIKELYQKALKESTGKEDFTYDPSQLNCLFEPKEYPITWELSDILTPAGIPLSGTTITKDSLAVLNALASHKGKRAFILIAPAFLGQFSDQVSPGMIRTAFKKIGFNGLLEVAVFADILTLREALEFDHNIHSNNDYQLTSCCCPMWIAMIKKLYTDLMPHVPATVSPMIAAGRTVKILHPDALTVFVGPCMAKKAEAREKDIAGAVDYVLTFQETKELFKLLHVNLTQMEDNVKEFSSKAGRIYARTGGVSEAVKSTLARLSPNRHIAIRSQQADGVPDCKKMITDLIGGKTQANFFEGMGCIGGCVGGPKSLLEPDKARDKVNQYGDKAIYETPLDNPYVLELLYRLNFTTLESLMSDNEFFTRKF	[FeFe] Group B	[FeFe] Group B	Evolving	Labile	1	[FeFe]-centre	None	0.549358	0.284809	0	1.80941	1.55125	3.43929	0	0	1.72832	0	0	0	0	0	0	2.513	0	0.646459	0	0	0	0	2.69545	0	0	2.02711	0.967684	0.891093	0	0	0.200378	0	0	0	0	1.86489	0	0	0	1.22702	0.917866
WP_014261748.1	MNQLYTDIIQIRQNVFAEITRIAYSDEDLIEALENAPMKILPGEVSERRQSIFKERAIVGERLRLTLGLPVRKASEFRRLSEGIKAIDETERVYEAPLVNVIPFACNACPTKALEVTSTCRQCMAHPCIQVCPVGAITMGETQTHIDKEKCIKCGKCKEACPYNAIIQYDRPCAEACGVNAIGSDEYGRALIDHDKCVSCGQCMAHCPFGAIADKAQIYQLVKSIRNKKQKHIAIVAPAFVSQFGDKITPAQVFEGIKMLGFDDVVEVGLGADIATINEAKEFLHVVPNELPYLATSCCPAWVSMVNKMFPEVVPQVSDALSPMKFTVQHIRKTDPDVKIIFVGPCVAKKLEALGEEMKSYVDFVITFEELMGMFVGKGIDLAAIETDNVINDSSAIGR…	[FeFe] Group B	[FeFe] Group B	Evolving	Labile	1	[FeFe]-centre, 2 x [4Fe4S] clusters	None	10.5882	8.31984	7.25609	7.23762	7.75626	5.15893	25.7751	15.9151	19.0115	7.30737	6.39456	1.89811	5.15689	6.02146	4.06588	3.7695	0	12.9292	19.4166	1.97418	9.83312	4.08238	4.04317	8.32381	4.95073	6.08133	13.5476	17.8219	13.2057	23.5229	9.41778	13.5304	14.9787	24.7533	20.1721	14.9191	26.1657	8.89591	13.525	4.29459	11.9323
WP_004602330.1	MITNDASLLDLKHKILEEVARLAWKDELNEEGKQKLVYELIPGPLAKYRCCVYKDRELVKQRIRLAEGKNPTPGNDSTNIVQILSPACEECPISSYSVTDNCRKCMGQACKNACKFDAISIGNHRSHIDPTKCRECGKCAQACPYNAIVHLERPCKKACPVGAITYNEYGICIIDEEKCINCGHCIHACPFGAPASKSNLPGIIADIKSDREVFAMCAPATEGQFGPDITMGSIRVACKELGFTDMVEVGLGGDMTAAYESEEWSEAKEAGKKMTTSCCPAFINMLRKHFPELYKNNMSSVVSPMCAISRYLKATHPGCITVFVGPCIAKKSEAADKELVAENADYVLTYGEFRAFLRSKDVELKPCEDRYQESSIFGKRFATSGGVAKAVIECMEERG…	[FeFe] Group B	[FeFe] Group B	Evolving	Labile	1	[FeFe]-centre, 3 x [4Fe4S] clusters, 1 x [2Fe2S] cluster	None	0.849109	0.5565	1.20935	0.904703	1.55125	0	0	3.18302	0.576106	0	0	0	0.644611	3.01073	2.03294	2.513	0	0	0	0	0.578419	1.68926	2.69545	0	0	0.675704	0.967684	0	0.489098	0.672082	0.400756	0	0	0	0	0	0	0	0	0	4.58933
WP_015394438.1	MIGQFMTIDNIPVEIQDEKNILELVRKAGIELPTFCFYSELSVYGACRMCMVETKRGDIESACSTPPRAGMEIFTNTPRLRKYRKNILELLLANHCRDCTTCQQSGACKLQELAKRFGINDVRFPNTAPDVELDESSVAIVRNKSKCILCGDCVRVCEEVQNVGAIDFVGRGSKMTVTTAFDEPIGHSNCVSCGQCAAVCPTGAIVVRSNTEKLWQDLNNPKKRVVVQIAPAVRVGLGTQLGEEDGRNAMGKMAAALRRMGFDKIFDTSVGADLTVIEETNEFVSKLQNNEALPLFTSCCPAWVNYAEKTYPELMKNVSSCKSPMGMFAAVLKEHYREDDRELVSVAIMPCSAKKFEAAREEFKNDGVPDVDYVVTTQEFVNMVNESGIAFSELEPEAL…	[FeFe] Group A3	[FeFe] Group A3	Bifurcating	Labile	3	[FeFe]-centre, 3 x [4Fe4S] clusters, 1 x [2Fe2S] cluster	NADH dehydrogenase, thioredoxin	0.870191	0.51715	0	0	3.10251	0.573215	0	3.18302	0	1.82684	1.82702	3.79621	0.644611	0	1.35529	1.2565	0	0	0	0	0.578419	0.703859	1.34772	0	0.309421	3.37852	0	0	2.93459	0	0.400756	0.644305	0	0	0	0.932444	0	5.93061	0	3.06756	0
WP_027398114.1	MNKKYITIDGILAPIEGEKNILDIIRKIGIELPTFCYNSDLSVYGACRMCVVEDKHGNIMASCSTPPRSGMEIKTNTPKLQQHRKMILELILADHCRDCTTCEKNFKCKLQDIAQKFGLREVRFENYSPWEEKDTSSPSIVRDSNKCILCGDCVRMCSEIQKVGAIDFAYRGSNMEITPAFKMPIAETNCVNCGQCSAVCPTGAIVVKDDTEKVWHDLYDDNVIMVAQIAPAVRVALGDEFGIPEGSNVMGKIVTALKRMGFDDVYDTATGADLTVIEEANEFVDRLENGGKLPLFTSCCPAWFKYAEINHPDITDNISSCKSPMQMFASVLKEQARKERPKKKAKKTKVVAIMPCTAKKYEANREEFKFEDDQAVDYSITTQELANMIRESGIVFSEI…	[FeFe] Group A3	[FeFe] Group A3	Bifurcating	Labile	3	[FeFe]-centre, 3 x [4Fe4S] clusters, 1 x [2Fe2S] cluster	NADH dehydrogenase, thioredoxin	4.54553	3.45988	6.65141	7.23762	7.75626	8.02501	6.75063	14.3236	5.76106	5.48052	4.56754	1.89811	10.3138	0	9.48705	0.62825	0	10.3433	14.1212	3.94835	2.89209	4.08238	8.08635	0	1.23768	1.35141	1.93537	3.56437	6.35828	0.672082	1.8034	0.644305	2.30441	13.6933	8.06885	0.932444	9.12755	5.93061	2.16399	8.58917	0.917866
WP_005333143.1	MQSIQNNRGGKNMGSMMIDGRRVEFTDEPNVLAVIRKAGIDIPTLCYHSELSIYGACRLCTVENEWGKTFASCSEKPKDGMVIYTNTPRLIKYRKQIIELLLASHCRDCTTCIKSGECHLQDLAHRLGVHDVRFENTKEPHPIDDSSPAIVRDPNKCILCGDCVRMCDNVQGVNAIDFAYRGTEAIVSPAFNKPIAQTDCVNCGQCRVVCPTGAISIKTNIDVVWDALADKDTIVIAQIAPAVRVAAGEEFGIPKGENVMGKLVGVLHRLGFDEVYDTAYGADLTVMEESKEFMERFNAGENLPLFTSCCPAWVKFCENRYPEFVPHLSSCRSPQQMFGAVVREYYKNPENNAGKKLVSVSIMPCTAKKEEILRPESKTNGRQDIDYVLTTTELISMIK…	[FeFe] Group A3	[FeFe] Group A3	Bifurcating	Labile	3	[FeFe]-centre, 3 x [4Fe4S] clusters, 1 x [2Fe2S] cluster	NADH dehydrogenase, thioredoxin	27.6012	22.5584	18.1402	7.23762	24.82	27.5143	39.8901	36.6047	57.6106	7.30737	26.4918	34.1659	10.9584	12.0429	22.3623	20.104	11.4983	14.2221	91.7876	31.5868	1.15684	13.3733	16.1727	35.3762	24.7537	39.1908	20.3214	16.0397	12.2275	34.9483	27.2514	42.5241	33.414	8.95332	20.1721	56.8791	20.6891	34.5952	64.9198	7.36215	41.304
WP_028828847.1	MSKAMIIDGMRVPYTDEKNILAVIRNAGIDLPTFCYHSELSIYGACRMCSVEDQRGNIIASCSERPKDGMVVSTNTRRVQKYRKTILELLLSNHDKDCTSCEITGKCQLQSLALRYGVKKSRFENNFQEKEIDNSSPSIVRNPNKCIKCGDCVMVCEDVQGVGALGFAHRGSEVEITPAFGRKLAESNCVNCGQCRIVCPTGAITIKNDTQRVWDAIFDDNTKVVAQIAPAVRVALGEEFGLPAGTMTLGKMVAAMRKMGVEQIFDTAIAADLTVREESGEFLSKFTKGQGLPLFTSCCPAWVKFVENKYPEFVQNLSTARSPQQIFGSVYKEIENANRENEDKRKPFLISVMPCTAKKEEITRPEFTKNGVPDVDVVITTQELAIMIKEMGVNFADLE…	[FeFe] Group A3	[FeFe] Group A3	Bifurcating	Labile	3	[FeFe]-centre, 3 x [4Fe4S] clusters, 1 x [2Fe2S] cluster	NADH dehydrogenase, thioredoxin	1.03406	0.725881	0.604674	0	3.10251	0.573215	0	0	2.30442	0.913421	2.74053	0	1.93383	0	2.03294	8.7955	3.83277	1.93938	0	0	1.15684	1.12617	1.34772	0	0.309421	4.05422	0.967684	0	0.489098	0.672082	0	2.57722	0	0	0	1.86489	0	0.988435	0.540998	0.613512	0
WP_013298245.1	MFKFNTDIQMLKYEVLYNVAKLTLEDRLEDHYDEIPYEIIPGTKPRFRCCVYKERAIIEQRTKVAMGKNLKRTMKYAIEGEEPVIQVLDIACEECPIKRYRVTEACRGCITHRCTEVCPKGAISIIDRKSHIDYDKCIECGRCKEACPYNAISDNLRPCIRSCAAKAITMDEELKASINYEKCTSCGACTLACPFGAITDKSYIVDIIRAIKSGKKVYALIAPAIASQFKDVTVGQIKSALRKFGFADVIEVALGADFVAVEEAKEFEERIKDLKVMTSSCCPAFVVHIKKSYPELAHNISTTVSPMTAISKYIKKHDPMAMTVFIGPCTAKKSEVMREDIKGITDFAMTFEEMAAILDAAKIDIKEQQDVEVDDATLFGRKFARSGGVLEAVIEAIKE…	[FeFe] Group B	[FeFe] Group B	Evolving	Labile	1	[FeFe]-centre, 3 x [4Fe4S] clusters, 1 x [2Fe2S] cluster	None	0.199854	0.00820993	0	0.904703	0	0	1.22739	0	0	0	0.913509	0	0.644611	0	0	0	0	1.29292	0	0	0	0	0	0	0.309421	2.02711	0	0	0	0	0	0	0	0	0	0	0	0	0	0.613512	0
WP_008521264.1	MVNIVIDGKSIQVPEKTTILEAAKSVGIKIPTLCYFKGLNEIGACRICVVEVEGYDRLFTACNSPVEEGMVIQTNSRKARETRKANLQFILSEHQDRCPMCVRNGNCELQKTAGDLNVHSTPFKKHIDDRTSNPDFPLIRDYSKCIKCMRCVQVCDKIQHSNVWDVVNSGGTITVDVGKAYRLEDAPCVLCGQCITHCPVGALHERDDTQKLMDAIDDPDKIVLVQIAPAIRTAWCEEFGMKPEEATVNRLASALRIIGFDYVFDTNFSADLTIMEESSEFVERLTHADQFKFPMFTSCCPAWVRFVKANWPKYIPQLSTAKSPQQMFGAIAKSWYPQLLGVDPKRIFSVSVMPCLAKKAECALPTMNSAGAGQDVDLAITNREITRLIRAHQIDPTDL…	[FeFe] Group A3	[FeFe] Group A3	Bifurcating	Labile	1	[FeFe]-centre, 3 x [4Fe4S] clusters, 1 x [2Fe2S] cluster	NADH dehydrogenase, thioredoxin	1.64224	1.16453	0.604674	1.80941	1.55125	1.71964	1.22739	1.59151	2.30442	2.74026	0	0	1.28922	3.01073	3.38823	0	3.83277	3.87876	1.76515	0	0.578419	1.68926	1.34772	0	0.309421	3.37852	0	0.891093	3.91279	0	0.801513	3.86583	1.15221	0.526666	0	0	0.608504	7.90748	0.540998	1.22702	0
WP_016822145.1	MNADRCVICGQCVQICSVYASDWADSSPQAAAIRRQERIRERDMPADIGEPLFAAYYSYNLNKVADMMKKPGQLRIVQCAPAIRVSLAEEFGMPFGTLTPGKMAAALRRLGFDRVYDTNFGADVTIMEEGTELIRRVTEGGPLPMFTSCCPAWVRFAEIEYPDLLDHLSSCKSPMQMVGALIKTYGAQLDEVEPANIYSVAIMPCTCKQFECDRPEMESDGYRDVDEVLTTRELAYWIKQRGIDFMNLPDEEFDAPLGQYSGAGTIFGVTGGVMEAAIRTGYELLTNEKLPKLQLDFVRGEEGIRVAEVQVGELQLKVAVVAGLQHAYQLLDRVQAGECDYHFIEVMGCPAGCISGGGQPKLMLEKQKIDAYRARKSSIYGHDAASQVRKSHENPFIIK…	[FeFe] Group A4	[FeFe] Group A4	Evolving	Labile	3	[FeFe]-centre, 2 x [4Fe4S] clusters	FeS protein, FeS protein	0.431146	0.113755	0	0	1.55125	0	0	4.77453	1.72832	0	0	0	0	0	0	0	0	0	0	0	1.15684	0.140772	0	6.24286	0.618842	0	0	0	0	1.34416	0	3.86583	0	0	0	0	0	0	0	0	0
WP_010251944.1	MEMVNITIDSRKLQVPKNYTVLEAARSANIEIPTLCFLKDINEIGACRMCVVEIKGARSLQAACVYPVSEGLEIYTQSPAVREARKVTLELILSNHDKKCLTCVRSKNCELQTLAEELNIKDIRFEGESCNLPLDDFSPSIVRDPNKCVLCRRCVSMCKNVQQVSVIDTNERGFKSIVSSAFNKSLNEVPCTICGQCINVCPVGALKEKDDTDKVWSALANPDLHVVVQTAPAVRVALGEEFGMPIGSRVTSNMVAALRRLGFSKVFDTDTAADLTIMEEGTEVINRIKNGGKLPVITSCSPGWIKFCEHNYPEFLENLSTCKSPHEMFGAVLKSYYAQKEGIDPAKVFVVSIMPCTAKKFEAARPELAATGYADVDVVLTTRELARMIKEAGIDFTNV…	[FeFe] Group A3	[FeFe] Group A3	Bifurcating	Labile	4	[FeFe]-centre, 3 x [4Fe4S] clusters, 1 x [2Fe2S] cluster	NADH dehydrogenase, thioredoxin, thioredoxin	2.45588	1.73375	0.604674	2.71411	4.65376	4.0125	0.613694	1.59151	2.30442	1.82684	4.56754	3.79621	0.644611	0	2.03294	0	7.66555	2.58584	0	0	4.04893	4.92701	6.73862	0	2.78479	2.70282	2.90305	8.01984	4.89098	4.03249	0.601135	3.22153	0	0	1.34481	1.86489	1.21701	1.97687	2.70499	0.613512	0.917866
WP_027717485.1	MSLINITIDGRPVQVPPGTTILEAARKAGVKIPTLCYLEELSVIGACRLCLVQVEGARTLVAACVAQAGEGMVVHTNTPAVRQARRVNLELILSNHPRECLTCLRNTNCELQRLAAELGVDQVRFEGEMSPYGVDDSSPALVRDPRKCVLCRRCVAVCSEVQGVSAIAVQERGFDTVVAPAFLAPLGEVSCVNCGQCSLVCPTAAIHERDQTAEVWAALADPEKHVVVQTAPAVRVSVGEMFGLEPGSIVTGKLVAALRRLGFDRVFDTDFAADLTIMEEANEFIHRLQNGGPLPLITSCSPGWIKFIEHFYPQLLPNLSTCKSPQQMFGALAKTYYAQRAGIDPAKIFVVSIMPCTAKKFEARRPEMRASGYWDVDVVLTTRELGRMIKQAGFDFASL…	[FeFe] Group A3	[FeFe] Group A3	Bifurcating	Labile	3	[FeFe]-centre, 3 x [4Fe4S] clusters, 1 x [2Fe2S] cluster	NADH dehydrogenase, thioredoxin	0.775195	0.476076	0.604674	1.80941	1.55125	1.14643	0	1.59151	0.576106	0	0.913509	0	0	0	6.09882	4.39775	0	0.646459	1.76515	0	0	0.703859	1.34772	0	0.618842	0.675704	0.967684	0	0	0	0	1.28861	0	0	0	0	0.608504	0	0	4.9081	0
WP_026649803.1	MQRFQSILQFKKVSCKNCYKCVRNCPVKAIRVHDHQARIIESQCIYCEKCIFVCPQDAKEEQNMIPAICNAMENKTQVIASLHPAYLARFGVTGINGIREAMKKLGFADAADAAEGASLMISQYRALFAEQKEPGIMISSACPVIVQLVKKHYPHLLGNLVQSASMMQFHASYLKKKYPKAEIVYVSPCISAISELRDSGNEVDYVITLEELAQWMKKEGISITEKEPEQIAYRSREIAIADGLTDLLGAVKGIRRLSVSGMEQCREVLEELHPEDFENCFLEMYACSGGCVAGPSFQMKKGHYLADVLAVKNAAFGKDFHREQGDYELPGFELRKNFGYCSAQEQEEVSEEEIRDALAEMGKFSPKDELNCGACGYNTCREKAIAIIQNKAEVAMCIP…	[FeFe] Group C	[FeFe] Group C3	Sensory	Labile	3	[FeFe]-centre, 2 x [4Fe4S] clusters, PAS domain	Phosphatase, thioredoxin	277.564	233.679	206.798	220.748	93.0752	108.338	489.114	259.416	286.901	224.701	241.166	153.747	66.395	418.491	54.2117	121.881	160.976	327.755	508.362	142.141	201.868	82.9145	64.6908	199.772	102.418	114.194	124.831	531.983	298.839	585.383	130.246	457.457	372.162	778.939	233.997	293.72	1025.94	95.8782	493.39	28.2216	590.188
WP_016146243.1	MRGVYTSINEIRRRVYTEIARMAYESDDYAKTMEGLPYQILPGERASYRDSIFLERAIVGERLRLAMGMPVRTAAADKPISDGIEKCLTEEQYYEPPLINIIKFACHACPEKQIVVTEGCQGCLAHPCTQVCPKDAIHIINGRSVIDQEKCIKCGRCQEACPYNAIIKQERPCAKACGVNAIHSDENGCAEINYDKCVSCGMCLVNCPFGAIADKAQIFQVIQAIKKGEKVYAAVAPAFVGQFGPKVTPEKLRAAMKALGFANVIEVAVGADLCATQEAIDFLDHVPEKIPFMATSCCPAWSMMAKQEFPEYKECISMVLTPMVLTGRMIKKRHPEAKIVFIGPCAAKKLEARRRSVRSDIDYVLTFEEMMGLFNAKNIDLESIEAEEALSKASTDGRN…	[FeFe] Group B	[FeFe] Group B	Evolving	Labile	1	[FeFe]-centre, 2 x [4Fe4S] clusters	None	60.4587	50.2548	48.9786	47.0445	46.5376	76.8108	106.169	63.6604	59.915	48.4113	77.6482	72.128	131.501	66.236	55.567	18.2193	19.1639	104.726	54.7195	43.4319	42.2246	31.6736	9.43407	31.2143	17.637	77.0302	48.3842	68.6142	52.3335	104.845	32.6617	73.4508	100.242	83.7399	61.8612	65.271	131.437	81.0516	94.6747	26.381	91.7866
WP_026393504.1	MKEVTFKINGQEMTVPEGTTILEAARQSNIDIPTLCYLKDVNEIGACRMCLVEIAGARALQAACVYPVANGIEVLTNSPAVRKARRVNLELILSNHNRECTTCVRSENCELQSLATDLGVSEIPFEGDKSGTLVDDLSTSVVRDETKCILCKRCVSVCTNVQSVAVLGSVGRGFTSQVQPVFNKSLAEVGCINCGQCIINCPVGALKEKSDIQRVWDAIADPSKTVIVQTAPAVRAGLGEEFGYPMGTSVTGKMAAALRRLGFDKVFDTDFGADVCIMEEGTELIGRVTNGGVLPMITSCSPGWIKFIETYYPEAIPHLSSCKSPQNITGALLKSHYAQANGIDPKDMVVVSIMPCTAKKYEVQREELCTDGNADVDISITTRELARMIKEARILFNKL…	[FeFe] Group A3	[FeFe] Group A3	Bifurcating	Labile	4	[FeFe]-centre, 3 x [4Fe4S] clusters, 1 x [2Fe2S] cluster	NADH dehydrogenase, thioredoxin, thioredoxin	2.73508	2.0372	1.81402	2.71411	12.41	1.71964	1.84108	0	3.45663	3.65368	1.82702	3.79621	0	0	8.13176	0	3.83277	5.17167	1.76515	0	0.578419	4.08238	5.3909	2.08095	9.28262	7.43274	1.93537	0	5.86918	0.672082	3.80719	3.22153	1.15221	0	1.34481	0	0	1.97687	0.540998	11.0432	0
WP_004330064.1	MHLLRQVHQQLSVRSDLRNFAGVRRAAAGAIFEISQVFDVLQRLREGEKMVAVVAPAILGQYNAPTEKVYGAIKAIGFEDVIEVAQGAMETIRNEGAELEEKIEEGQAFMTTSCCPSWVELANKHIPEMKPFISSTGSPMYYAARIAKEKHPDAQVVFIGPCVAKRKEARRDECVDFVMTFEEINSIFDGLGIEVATTDPFPIPFVSTRAAHGFAQAGGVMGAVQLFLTDNNRPQVEGIQVSNLNKKNVSLLRAYAKSGKAPAKFIEVMACEGGCITGPSTHNLHDAGKRQFAKELAKR	[FeFe] Group B	[FeFe] Group B	Evolving	Labile	1	[FeFe]-centre, 2 x [4Fe4S] clusters	None	35.2393	29.1414	4.83739	115.802	32.5763	25.2215	16.5697	23.8727	61.0672	63.9394	21.9242	74.0261	3.86767	6.02146	2.03294	0	130.314	32.323	1.76515	3.94835	7.51944	72.6382	21.5636	2.08095	7.4261	33.1095	54.1903	8.91093	14.673	6.04874	142.87	0.644305	8.06544	5.26666	1.34481	8.39199	0.608504	25.6993	10.279	20.2459	11.9323
WP_014553922.1	MSKLKGIYTDIVKIRRMVFAELARLALKDAASEEFDKIPYRIIDTEESTYRSSIFKERAIVAARVRLGLGMDYETNQEHKLLSEGVKDFLENENQLDKPLVNVIRFACEKCPTNAHFVTNNCRKCLAHPCSIVCPVDAITIEEKAAVIDQEKCINCGKCKKACPYEAIVNYERPCAEACGVDAIESDEYQRAKINQNNCVSCGQCIIACPFGAIADKSMIFQLLKAIKKGEDIRAIIAPSFVGQFGPLVKAEQIVAALAKLGIKEIREVSLGADFASLHEADLFAEDVPEEQPYLGTSCCPSWTYVAEKHVPEVKENISASSSPMIFAARSVKENNKDSKVVFIGPCVSKKLEALSPKVKDEVDYVITFEELAAIFVAADIELTKVESEEEINDASYYG…	[FeFe] Group B	[FeFe] Group B	Evolving	Labile	1	[FeFe]-centre, 2 x [4Fe4S] clusters	None	0.451178	0.267594	0	0.904703	0	0.573215	0	1.59151	0	0	1.82702	0	0	0	2.03294	0	0	0.646459	0	1.97418	0	3.37852	0	0	0	0	0	0.891093	0	0	0	1.93292	0	0.526666	0	0	0.608504	0	0	0.613512	0
WP_028264340.1	MVTLTIDNIQVTVPEQTSILDAARMAGIYIPTLCYLKDLNEIGACRVCIVEIEGIDQLVASCNNYVLDGMVVHTNSKKVREARRMNVELLLSTHNSSCTSCVRSRNCSLQNVSNDLGIYYQDFPNTHVPFTPWNKDYPLIRDNSKCIGCYRCIQVCDKVQNSHVWSMTSRTHHAVVDVVGGKDFSEADCTLCGQCVVNCPTGALRERDDTERVWDALSDPDTCCVVQIAPSIRTAWGEEFGIEPADANLSQLVAALRKLGFDYVINTDFSADLTIMEESAELLEHLPQSQNGGLPLFTSCCPGWMRYAKAHYPQLVDYISTCKSPQQMMGAVVKSYFAQQIGVEPSSVFSVSVMPCIAKKSEAKIPDMCNADELRDVDVVLTTRELVRMIRANHIAVHD…	[FeFe] Group A2	[FeFe] Group A2	Evolving	Labile	2	[FeFe]-centre, 3 x [4Fe4S] clusters, 1 x [2Fe2S] cluster	NADH-dependent glutamate synthase	1.90504	2.33693	1.81402	2.71411	6.20501	3.43929	0	1.59151	2.30442	3.65368	0.913509	1.89811	2.57845	0	3.38823	3.7695	3.83277	2.58584	1.76515	0	0.578419	0.84463	2.69545	6.24286	1.23768	2.70282	0.967684	1.78219	3.42369	1.34416	0.200378	1.93292	1.15221	2.10666	1.34481	1.86489	0.608504	3.95374	0	3.68107	0.917866
WP_014118796.1	MVNIEINGKALSVPEGSTILSAAQGAGIPIPHLCYLKGINEIAACRICVVELEGTQRLIPACNTQVEEGMVIKTNSPRVRSARRTNLRLILSEHNSTCTTCIRSGNCALQTLSHDLNIHYQPYRLQPEKSRVDLDAPVVREASKCIKCMRCVQICDKVQGMHIWDVAGTGSRTTVDVSFNRLLKNTDCTFCGQCVTHCPTGALTIRDDSNKVLRALADPEITTVIQVAPAVRVAWAEAFSLSPKFATAGRMVAALRRMGFDYIFDTNFTADLTIMEEGSEFLERYTHRGKYRWPMFTSCCPGWVRFVKSQFPSYTECLSTAKSPQQMFGAIAKSYFAEKKGIDPHKMFVVSIMPCSAKKSECELPTMKDACGDPDVDAVLTTREMVRLLRSDCIVPTDL…	[FeFe] Group A2	[FeFe] Group A2	Evolving	Labile	2	[FeFe]-centre, 3 x [4Fe4S] clusters, 1 x [2Fe2S] cluster	NADH-dependent glutamate synthase	30.4443	25.1325	15.1168	41.6163	76.0114	14.9036	35.5942	52.5198	86.9919	75.8139	28.3188	53.147	6.44611	12.0429	34.56	5.026	15.3311	21.9796	21.1818	3.94835	12.1468	46.1731	63.3431	31.2143	66.5255	77.0302	20.3214	3.56437	23.4767	8.06498	27.8526	45.1014	6.91323	10.0067	41.689	7.45955	5.47653	65.2367	2.16399	69.3269	4.58933
WP_007049654.1	MKEIFTPIVDIRRKVFKEVALLAYENKEPELEKLAAEIVEEQDNKITNKKREKALILERIRLALGLDVSSNETPFDEDKDKENILGEKNVLNLPLVNVVSKACMQCEENTVFVTNNCRGCYAHPCSEVCPVDAVYFENGKSVINKDKCVRCGRCVEACPYNAIVKFDRPCKASCGVNAYTEDEEGNAKIDYEKCVSCGQCIVACPFGVVSDKSEIYQTIKAIQNNNEVIAEIAPAFVGQFGKGASPEKIKEALLKLGFSDVIEVALGADMGAVFEAKHFIEKVKTGEEPFLATSCCPSWAVMAKRDYPDIAPYVSPALTPMVATARVIKENHPNAKIVFIGPCSAKKLEANRRSVKSDVDYVLTFEEVAGMFEAKGIDVDSFEGEKLDDATAAGRGYGY…	[FeFe] Group B	[FeFe] Group B	Evolving	Labile	1	[FeFe]-centre, 2 x [4Fe4S] clusters	None	3.09558	2.39731	3.62804	1.80941	1.55125	5.15893	1.22739	1.59151	4.60884	2.74026	0	1.89811	0.644611	12.0429	0.677647	1.2565	0	3.2323	7.06058	0	4.62735	1.83003	2.69545	0	1.5471	2.70282	2.90305	7.12874	4.89098	3.36041	2.00378	3.86583	6.91323	2.63333	1.34481	1.86489	2.43401	3.95374	3.78699	3.68107	4.58933
WP_012374366.1	MIKARINQLDVEVPEGTSILDAARQVHVKIPTLCKHRDLLPTAACGICIVRNKGGNKLIRACCTPLEEGMEITTHDSDIVDVRRATLELILSNHPQACLTCGRNGECELQTLAADFNISMETIKRYVKDVPPDRSTNCIVLDFTKCIKCGRCIQVCQEMQNVWALSFLDRGINTRMAPAGDITLAESPCVKCGQCSAHCPTGAIVEKDETATVWSALRDEDKICVVQIAPSVRVTVGEAFGLPPGTNLTKKLYSALRRLGFKAVFDTNFAADVTIVEEASEFVERFAHKRGPLPLITSCCPSWTDHMEKRHYDFIDNFSTAKSPQQMLGVLAKTYYAQKAGVDPSKLFMVSIMPCTAKKYELSRTEEMHASGFADVDVVLTTRELARMLKQSGIEFLAL…	[FeFe] Group A3	[FeFe] Group A3	Bifurcating	Labile	3	[FeFe]-centre, 3 x [4Fe4S] clusters, 1 x [2Fe2S] cluster	NADH dehydrogenase, thioredoxin	0.281815	0.0261191	0	0	0	0	0.613694	1.59151	0	0	0	0	0	0	1.35529	0	3.83277	0	0	0	1.15684	0.140772	0	0	0	2.02711	0.967684	0	0	0	0	0	0	0	0	0	0	0	0.540998	1.22702	0
WP_021644837.1	MAFTNNIMIVRHKLLADLVRLWKDEQLIEKIDRLPLELTPKKSKHMGRCCVHKERAVWKYKSFPLMGFDMSDEHDELTPLSEYARQALKREEITKENILCVIDEACSSCIQINYEITNLCRGCVARSCYMNCPKGAVHFKKNGQATIDHDACISCGICHKSCPYHAIVYIPVPCEEACPVKAISKDEEGVEHIDESKCIYCGKCINACPFGAIFEISQTFDVLQGIRKGEKMVAIIAPSILGQFNTSIEQVYGAFKQIGFADVIEVAEGAMMTISNEAHELVEKLEEGQAFMTTSCCPSYIELVEKHVSGIRPYVSSTGSPMYYAARIAKEKHPDAKIVFVGPCVAKRKEVRRDEAVDFILTFEEIGSIFDGLGIELKEAQPFSVLHTSVREAHGFAQA…	[FeFe] Group B	[FeFe] Group B	Evolving	Labile	1	[FeFe]-centre, 3 x [4Fe4S] clusters, 1 x [2Fe2S] cluster	None	3.37976	2.53019	0	6.33292	6.20501	2.86607	1.22739	0	7.48937	6.39394	2.74053	9.49053	0	0	0	0	15.3311	2.58584	0	0	1.15684	6.89781	5.3909	0	0	1.35141	4.83842	0.891093	0.489098	2.68833	9.01702	0	0	0	0	1.86489	0	1.97687	1.082	3.68107	0
WP_021739954.1	MENITIKINGREVSAPQGSTILEAARLAQIEIPTLCYLKEINEIGACRMCVVEVKGARSLVTACVYPINEGMEVWTNTPKVIASRRKTLQLLLSNHDRKCLSCVRSGNCELQTLCREYKVDDEAYYDGERNKYELDTSAAHMVRDNNKCILCRRCSAVCEKVQGVGVIGANERGFKTYIGTAFDMDLGDTSCVSCGQCIAVCPTGALYEKDNTEEVFAAIADPEKYVVVQCAPAVRAGLGEAFGMPIGTDVEGKLAAALRRLGFDKVFDTTFSADLTIMEEAHEFLDRVQNGGVLPLITSCSPGWIKYCEHYFPEMTENLSSCKSPQQMFGAIAKSYYAEKMGIPKEKMVVVSVMPCTAKKFEIGREDENGAGVPDVDIAITTRELGRMIERASIRFTD…	[FeFe] Group A3	[FeFe] Group A3	Bifurcating	Labile	4	[FeFe]-centre, 3 x [4Fe4S] clusters, 1 x [2Fe2S] cluster	NADH dehydrogenase, thioredoxin, thioredoxin	22.4837	18.568	18.7449	44.3304	13.9613	41.8447	23.9341	11.1406	27.6531	17.355	26.4918	7.59242	8.37995	6.02146	14.2306	10.052	0	9.05043	22.9469	11.8451	53.2145	18.8634	13.4772	27.0524	30.9421	9.45985	15.4829	19.604	19.5639	61.1595	33.0624	30.9267	10.3699	28.9666	18.8273	15.8515	38.3357	5.93061	15.1479	18.4054	29.3717
WP_013387868.1	MRNFVFNKAMELRRDTLKTIVSLYEKDQLREKFPKIVREILPGDNPVYRNNIYREREILKQRIKIYLDFDYEKTRDLELFELVNHLDSKFFYKKDELRGKHKYVRVIKEACDVCPSGKYYATDLCRNCIAHNCTNVCPRDAIVFDDGRAKIIPEKCIGCGLCAKSCDYYAIVKLERPCERACTLNAITKDENGAADINKDKCVACGACHVACPFGAIESPTQILDVVHTIKNQDEVIAIYAPAIVSQFGHTVSPGKIKSLFKKLGFSDAMEVAVGADMVAEEEVEILRENPGKMTTSCCPSFYSYIKKHQPEMEKYISHAPSPMAKLAEHLKEKYPNKKIAFIGPCIAKKMEADKYNVLKEKKVVDYVLTFTDVAAWIEARELDVATLPEDDILGTSFG…	[FeFe] Group B	[FeFe] Group B	Evolving	Labile	1	[FeFe]-centre, 2 x [4Fe4S] clusters	None	0.270307	0.0694874	0.604674	0	0	1.14643	0	0	0	0	0	1.89811	0	0	0	0	0	0	0	0	1.73526	0.140772	0	0	0	0	1.93537	0	0	0	0	0.644305	0	0	0	0	0.608504	0	0	0	0.917866
WP_011393219.1	MSTVKLTIDNIPVEVEAGTTILKAAEEAGIHIPTLCYLEGINEIGACRVCVVEVEGARNLMASCVAPVAEGMVVKTNSPRVRMARRLNVELLLSNHEMECPTCIRNLNCELQSLARGLGIRQVRFKGKKSEHPVDDSTPALVREPDKCILCRRCVAVCEKVQGVMAIAPLGRGFDTVIAPAFQEKLVDIACVECGQCTLVCPVGALYEKDYTSEVWAALADPEKFVVVQTAPATRVSIGQEFGLAPGSINTGQMVAALRRLGFDRVFDTDFSADLTIMEEGSEFIERFTKDGPLPLITSCSPGWIKFMEHFYPELIPNVSTCKSPQQMFGAVAKTYYARKAGVDPARMVVVSIMPCTAKKFECQRPEMRDSGYQDVDYVLTTRELARMIREAGIDFKNL…	[FeFe] Group A3	[FeFe] Group A3	Bifurcating	Labile	3	[FeFe]-centre, 3 x [4Fe4S] clusters, 1 x [2Fe2S] cluster	NADH dehydrogenase, thioredoxin	5.58347	6.53701	0.604674	10.8564	12.41	8.02501	6.13694	1.59151	5.76106	10.0476	4.56754	1.89811	2.57845	3.01073	6.77647	1.88475	7.66555	5.81813	1.76515	0	2.89209	3.66006	9.43407	2.08095	2.78479	13.5141	2.90305	19.604	7.82557	1.34416	2.00378	12.2418	1.15221	3.68666	4.03442	4.66222	6.69354	7.90748	1.62299	8.58917	4.58933
WP_015560495.1	MELIYANDNCTGCNKCVRDCPVLIANVATDAGKVIVDSEKCIACGACFDACEHNAREYQDDTKSFFTALEAGKKISVILAPAFFANYPHEYKKVLGYLKEKGVNHIYSVSFGADITTWGYLKYITEHQFLGGISQPCPAVVNYVEKYIPELLPKMMPIHSPMMCMAIYIKKYLKCDDELAFISPCIAKKTEITDPNCYGYVKYNVTFKKLFETIGNKYQGCKEYEDELEYGMGALYPMPGGLRENVEHFLGKEQVVRQVEGEKEAYRYLHEYLERIKKNKRQPFMVDILNCSKGCIYGTATELERNTDDVMLTLSDMRNKTANAGADAKRGLFGKKTKNGSPWDESVPEKDRLVNLMKAFEDLDINDFVRKYTNKSVEIKEPAEHEMQEIFASMNKTDA…	[FeFe] Group C	[FeFe] Group C2	Sensory	Labile	1	[FeFe]-centre, 2 x [4Fe4S] clusters, PAS domain	Fusion with methyl-accepting chemotaxis protein	135.331	117.93	49.5833	33.474	99.2802	30.3804	82.8487	73.2095	88.7203	18.2684	104.14	204.995	30.2967	114.408	122.654	544.693	172.475	173.251	284.189	209.263	324.493	143.869	61.9953	268.443	71.4762	95.2742	190.634	30.2972	20.053	247.326	127.24	70.8736	85.2632	309.679	251.479	231.246	47.4633	60.2945	17.8529	21.4729	107.39
WP_029502586.1	MAKYMIIDGNRVEFNDEPNILALVRKAGIDLPTFCYYSDLSIYGACRMCVVEDQWGGIIASCSTPPKDKMEVKTNTPKLHQHRKMILELLLAAHCRDCTVCDKNGKCRLQELALRFGIKTVRFENKTEEMELDTSSTSIIRDPGKCILCGDCVRMCHEIQNVGAIDFAHRGAKMVVSPAFNKKIAETNCVNCGQCAAVCPTAAITVKSDLKEVWKAIYNPKKRVVVQVAPAVRVALGEEFHMKAGENVIGKIVAALRRLGFDAIFDTTVGADLTIMEESKELLKKLESGDSKYPLFTSCCPGWIRYAETQHKELLPYISTCKSPMEMFGAVIKEHFKGLDSSEGVETISVAIMPCTAKKFEASREEFKRNNVPDVDYVITTIELVKMIKEIGIQFEELD…	[FeFe] Group A3	[FeFe] Group A3	Bifurcating	Labile	3	[FeFe]-centre, 3 x [4Fe4S] clusters, 1 x [2Fe2S] cluster	NADH dehydrogenase, thioredoxin	12.4315	10.4776	12.0935	6.33292	29.4738	10.3179	7.97802	6.36604	27.077	6.39394	9.13509	3.79621	2.57845	12.0429	44.7247	69.1075	19.1639	20.6867	17.6515	0	19.6662	16.4703	14.825	4.16191	8.66378	8.78415	19.3537	2.67328	6.84738	9.40915	5.81097	16.1076	5.76103	1.05333	24.2065	9.32444	1.21701	29.653	2.16399	15.9513	4.58933
WP_007157603.1	MVTNDKGFIPLKHRVIEGLARIAWNGEVTEEAKEGLIRELSPGPKAAFRCCVYKEREILRWRIRLACNEDASPKRKSSNVIQVIDPACEECPISSYSVTDNCRLCLGKACQNSCHFGAITMTDQRAHIDPMKCKECGMCATACPYSAIAQLTRPCKKPCPVNAITYDENGLCVIDDNRCIRCGQCVHSCPFGAISTKTHLLQVISAIKEGKEVYAMCAPATEGQFGKDISMSAIRVALKKLGFTDMVEVGLGGDMTAAYEALEWSEARKEGKKMTTSCCPAFINLLKIHFPDQYHENMSETLSPMAAVSRYLKAIHPDCVTVFIGPCMAKKSESQEMGIEGNADYVLSFGEFSSLLRSKDVQLEAEVSPYQEASLWGKNFASSGGVANAVMECMRERGE…	[FeFe] Group B	[FeFe] Group B	Evolving	Labile	1	[FeFe]-centre, 3 x [4Fe4S] clusters, 1 x [2Fe2S] cluster	None	3.81357	3.38502	3.02337	1.80941	1.55125	1.71964	0	4.77453	4.03274	2.74026	5.48105	0	0.644611	0	2.03294	5.026	15.3311	3.2323	1.76515	3.94835	5.78419	3.51929	0	4.16191	1.23768	3.37852	2.90305	0.891093	2.93459	6.72082	2.60492	7.73166	4.60882	9.47998	4.03442	6.5271	5.47653	1.97687	2.16399	1.22702	3.67147
WP_005679640.1	MAFTNNIMIVRHKLLADLVRLWKNDQLVEKIDRLPIELSPRKSKPLGRCCVHKERAVWRYKMFPLMGLDMTDEHDEVTPLSEYAQQALSRPEPDKENIMCVIDEACSSCIQINYEITNLCRGCVARSCYMNCPKDAIRFKKNGQAMIDHETCISCGICHKSCPYHAIVYIPVPCEESCPVKAISKDEHGIEHIDESKCIYCGKCMNACPFGAIFEISQTFDVLQRIRKGEKMVAIIAPSILGQFKTSIEQVYGAFKEIGFTDVIEVAEGAMSTTSNEAHELLEKLEKGQSFMTTSCCPSYIELVEKHIPGMKPYVSTTGSPMYYTARIAKEKHPDAKIVFVGPCVAKRKEVRRDEAVDYILTFEEVGSILDGLDIQLEQTQAFSILHTSVREAHGFAQA…	[FeFe] Group B	[FeFe] Group B	Evolving	Labile	1	[FeFe]-centre, 3 x [4Fe4S] clusters, 1 x [2Fe2S] cluster	None	12.2301	10.5757	0.604674	16.2847	18.615	6.30536	0.613694	4.77453	0	55.7187	4.56754	148.052	19.983	18.0644	0	0	3.83277	8.40397	3.53029	0	2.31368	14.9218	0	4.16191	20.1124	25.6767	8.70916	0	7.33648	0	73.9396	0	0	0	0	0	0	0.988435	0	28.2216	1.83573
WP_018086225.1	MENLREKEEIKAAGEMVTINIDGRDYRVPRGLSVLEAARTVNIEIPSLCYLKDINEIGACRVCVVEIEGARTLQASCVYPVREGLVVRTNTERVRRARKTAVTLLLSNHHRECTTCIRNLNCELQNVADSLGIRNIPFTGEMKDYGFFDHNPAIQRDYNKCIHCRRCLAICNKIQECYVYSPLYRGLNTVIAPAFQKDLAEVSCIMCGQCVLACPTASLTEKEHIAEVWRAIADPDKLVVVQTAPSIQVTIGELFGMPMGSFVAGKLVAALRHLGFDRVFATDVTADLTIMEEGSELMERLLHQPEKLPLLSSCCPGWVKYAEHFYPEFLPHLSSTKSPHAMCGALTKSWYARQHNIDPQRMVNVAIMPCTAKKYEAARPEMECDGLRNIDYVLTTREL…	[FeFe] Group A3	[FeFe] Group A3	Bifurcating	Labile	3	[FeFe]-centre, 3 x [4Fe4S] clusters, 1 x [2Fe2S] cluster	NADH dehydrogenase, thioredoxin	0.615783	0.397454	0.604674	0.904703	1.55125	0	0.613694	0	2.30442	0	0.913509	0	0.644611	0	1.35529	0	0	1.93938	0	0	0	1.68926	1.34772	2.08095	0.928262	0.675704	0.967684	0.891093	0.489098	0	1.40265	0.644305	0	0	0	0	0	0	0.540998	1.22702	0.917866
WP_015556986.1	MGTMIINGRPVEFTDEKNVLAVIHKAGIDMPTLCYYSELSTYGACRMCVVEDARGKIDSSCSMEPRDGLEIRTNTARLLRYRRMILELLLAAHECDCTVCSKSGSCRLQMLAHRYGVKRVRFEDTRERLPQDESSYAIVRNPNKCILCGDCVRVCREIQGMGILDFVNRGSEARVRPAFNEPMIHTRCISCGQCAAVCPTNAIRVRRHIDDVWKAIFDPKKRVVAQIAPAVRVALGERFGLEPGVNSIGKVVAALRTLGFDHVTDTTLGADFTVMEEAAELMQRLEDGGPFPMFTSCCPAWVKYCENCAPDLLKHLSTCRSPMQMFSPVIKAYYAQAEADGRETCSVAIMPCAAKKMEAAREEFRTNGVPDTDYVLTTQELIEMIEEAGIDFDALVDLA…	[FeFe] Group A3	[FeFe] Group A3	Bifurcating	Labile	3	[FeFe]-centre, 3 x [4Fe4S] clusters, 1 x [2Fe2S] cluster	NADH dehydrogenase, thioredoxin	10.4439	8.70489	5.44206	12.6658	29.4738	12.6107	10.4328	14.3236	31.6858	15.5282	9.13509	0	0	9.03219	15.5859	3.14125	7.66555	12.9292	0	0	0	17.4557	28.3022	20.8095	48.5791	23.6496	12.5799	0.891093	3.91279	4.70457	14.6276	25.1279	0	1.58	10.7585	6.5271	0	7.90748	2.16399	22.7	1.83573
WP_007156182.1	MQMVNCTIDGKKVCVPEHTTILEAAKEIGVYIPTLCYFKDLNEIGACRVCVVEVEGDQRLHAACNSPVLEGMVVHTNSKKAREARKCNVELILSQHNVTCTTCVRSGNCALQHVANDLNIMGESFPKDLPKQKGSKSFPLIREYDKCIKCMRCIQVCDKIQATHVWDVINSGGKSTVDVRDFYRLEDSPCSLCGQCITHCPVGALRERDDTDKVLDALDDPETIVLAQIAPSIRTAWGEEFGLDAEEASVQRLASCLKEVGFDYVFDTDFAADLTIMEEASEFLHKLTHQEGDFPMFTSCCPGWVRFIKSHYPEYIPQVSTSKSPQQMFGAIAKSYYADILKVSPKKIFSVSIMPCLAKKAECSYPNMTDSEGNFDVDVALTTREVNRLIRAMHISPKK…	[FeFe] Group A2	[FeFe] Group A2	Evolving	Labile	2	[FeFe]-centre, 3 x [4Fe4S] clusters, 1 x [2Fe2S] cluster	NADH-dependent glutamate synthase	3.75294	3.00262	7.25609	4.52351	7.75626	4.58572	2.45477	1.59151	4.03274	7.30737	2.74053	1.89811	4.51228	0	2.03294	3.14125	3.83277	1.29292	1.76515	1.97418	0.578419	5.63087	21.5636	0	14.5428	12.1627	2.90305	0	3.91279	2.01625	1.40265	1.93292	0	1.05333	1.34481	1.86489	0.608504	5.93061	0	12.8838	0
WP_011393383.1	MIYIDRDLCTGCRRCAEICPTGAIEGNQGEPQIINREICVNCGQCVQICSAYASPYTTSPETMAAKNRERRLLPAAAPEPLFAAYNESHEELVREALARPDLFNAVQFAPAIRFALAEDFGLSPQVVTVGRIVAALRRLGFKYVYDTNFAADLTVMEEGYELLQRLQGDGALPLFSSCCPAWVKFVEQAYPQLIANLSTCKSPQQMAGAIFKTYTGQLDPDLRSRHLFVTAVMPCIAKKFECNRPELGGSYGRDVDAVLTTRELAHLIKDKGIDWHSLAEEEPDQPLGEYSGAGAIFGVTGGVTEAVLRTAAEVVGGKPLEEIEFHEVRGMAGTRKVNINLGKEQLEIIIVAGLKNVVPILDDLIAGKASFHFMEVMACPAGCLSGGGQPKILVETYRG…	[FeFe] Group A4	[FeFe] Group A4	Bifurcating	Labile	6	[FeFe]-centre, 2 x [4Fe4S] clusters	NADP dehydrogenase, four FeS proteins	0.516654	0.229752	0.604674	0	1.55125	0	0	0	0.576106	0.913421	0.913509	0	1.28922	0	0	0	0	0	0	0	2.31368	0.140772	0	8.32381	1.23768	1.35141	0	0	0	0.672082	0	0	0	0	0	0	0	0	0	0	0
WP_021432325.1	MIVNIDKDLCTGCKKCSDVCPVDAIQGEKGKAQFIDEDRCVICGQCVQQCKSFAPIYELGQDTIEAKKEERGMLESVQEPLFAAYNTCDVEKVKEALADPNSFTVVQCAPAVRVALGEEFGCDLGELTYGKMVAALKQLKFDRVYDTNFAADLTIMEEGSELIKRIGENKNLPMFTSCCPAWVKFMEDNYPELTNHLSSCKSPQQMGGVVFKTYGAQMNNVDPKDVFSVAVMPCTCKKFECDREEMKSSGYKDVDVVITTRELAYLIKDMGIDFNSLNNEDFDSPLGDYTGAGTIFGVTGGVMEAAIRTGYELITNQEIPNVEVTQVRGGEGIRKSVIKVGDLSLKVAAVSGLKNVVSILEDIKKGDCDLHFIEVMTCPEGCISGGGQPKLLLDEYREL…	[FeFe] Group A4	[FeFe] Group A4	Evolving	Labile	3	[FeFe]-centre, 2 x [4Fe4S] clusters	FeS protein, FeS protein	1.11661	0.865551	0.604674	0	0	0	1.84108	4.77453	1.15221	3.65368	1.82702	0	1.93383	0	0	0	0	0	1.76515	0	0	0	1.34772	0	0	0	0	13.3664	0	1.34416	0	1.93292	1.15221	5.79332	0	0	0	0	0	3.06756	0
WP_019264891.1	MVKLTMEPVTRIEGHAKITVQLDDDGNVVDTRLHVMEFRGFEKFLQGRPVEELARIVPRICGICDVQHHLAAAKAVDQIFGFEDEKILPTAYKMREIMNWGSFMHSHALHFYFLAAPDLIIPDGTRKTRNVFQIIKDQPEIALQAIELRRNGLEIVRKIGGRPIHPTSSTPGGISTELDDETQKDLLQRAQRNVELAQATLDLAKPIFEEKMDLVKSLGYFGDTRHCGLVNDGVWDVYNGDVRIKDVDGSIYTEYKNLEYKDVVAEHVKPYSWLKFPYIKELGYPEGIYRVAPLSRINVADKMPDAAPLAQAAFEEFHDKFGYAQAPLLFHWARLIELLASAECAADALDQDLSGPKFPEELERTAGEGAGIVEAARGTLIHNYACDDNGLVTEANIVV…	[NiFe] Group 3c	[NiFe] Group 3c	Bifurcating	Sensitive	4	[NiFe]-centre, 3 x [4Fe4S] clusters	Polyferredoxin, [FeS] protein	1.74162	1.19963	0	3.61881	0	0	0	0	0	13.7013	0	0	0	0	0	0	0	0	0	0	0	0	0	0	0	0	1.93537	9.80202	0	0	0	0	0	0	0	0	0	21.7456	0	33.7432	0
WP_015513468.1	MKVIDFKNASCKHCYKCVRSCSVKAIKVKDAQATIMDDHCVLCGTCLEVCPQNAKTFVSDLEKVKAFITMGEKTIVSLAPAYLGIFDYDKPGQVVDALLRLGFSEVRETAEGAAYVTEAYARLLEEGQMKNIISTCCPSVNELVEKYYPELVEYMAPVVSPMIAHGKLIKSMYGPDVKVVFVGPCIAKKQEAEGDDRTTGFVDAVLNFEEIESWLQERDISIRECEGKQPTNPDPKVNRLYPVTSGVISSVLAKKKVDSYKKIFVDGIEDCREVFEDMKKGLIDGCFIEANMCEGGCVKGPAVNKLHISKYKATMVIEEQVEKQDPAYSQLAGNIDISKHFRSERIQDEMPTEEQITRILKATGKYNKTQELNCGACGYPTCRDKAIAVFQGKAEQEMC…	[FeFe] Group C	[FeFe] Group C3	Sensory	Labile	3	[FeFe]-centre, 2 x [4Fe4S] clusters, PAS domain	Phosphatase, thioredoxin	16.4219	15.6141	10.8841	17.1894	4.65376	24.6482	28.2299	27.0557	19.5876	22.8355	22.8377	30.3697	4.51228	36.1287	25.0729	16.9628	11.4983	12.2827	31.7726	19.7418	1.73526	16.1887	10.7818	6.24286	8.66378	24.3253	5.8061	15.1486	24.4549	43.0133	9.61816	7.08736	16.1309	4.21333	6.72404	33.568	20.0806	41.5143	15.6889	32.5162	11.9323
WP_022379409.1	MTRSVIDPITRIEGHLRVEMEVENGVVTDAWMSGGCFRGMELVVQDRTPEDAAHIVQRICGVCPVSHAHASSIAAEKAYGIEIPNNARIIRNLIEGGQFLHSHILWFYTLAALDYVNPLNGLNANIADAYDLAQAAGTSMNTDLRALAQRLTTFAENGQMSIFSGNWWKNGAADAEFNLPAELDLICTAHYIEALTMQSKASEICGLLGGKMPHVMTLVPGGTSFVPTEEKLDDLWSLCHELRDWVAATMIPDTKAIAPYYLPALEFGKGCGRYVAWGVFERPSFEMADRYLPSGVIDENLNLSEVNEDLIKEYVGHSWYVGDSDLNPREGVTEPEFTEYYKEGTLFEQNGHEFGEISDRYTWSKAPSYDGKCMEAGPFSRVLAAYLRGNEFIKTNLDQ…	[NiFe] Group 1a	[NiFe] Group 1i	Anaerobic Uptake	Sensitive	3	[NiFe]-centre, 3 x [4Fe4S] clusters	Cytochrome b	1.14378	0.797995	0	6.33292	17.0638	0	0	15.9151	1.15221	11.8745	0	0	0	0	0	0	0	0	0	0	0	0	0	0	0	0	0	0	0	0	0	0	0	0	0	0	0	4.94217	0	0	0
WP_012033166.1	MITLTIDNQKVAVEPGSTILEAAKKLGINIPTLCYLKDINVIGACRICMVEVQGARTFVPACVAPVAEGMVVRTNTPAVIKARKLVLELILSDHPMECLTCVRNQNCELQKLAEQFGIKEVRFDGAKTEYPIDDSSPAIIRDPRKCVLCRRCVAVCSNIQTVNALTAQERGFDTLIAPAFNEKLANMECVQCGQCSLVCPTAAIQEKDDIDKVWAALADPKKHVVVQTAPATRVQLGETMGMEPGSIVTGKMVAGLRRLGFNKVFDTDFTADLTILEEGNELLQRIKTGGVLPMITSCSPGWIKFAEHFYPDLLPHLSTCKSPQQMFGALAKTYYAQKEGIDPADIFVVSIMPCTAKKFECQRPEMKDSGYQDVDVVLTSRELGRMFKQANINIAELPE…	[FeFe] Group A3	[FeFe] Group A3	Bifurcating	Labile	3	[FeFe]-centre, 3 x [4Fe4S] clusters, 1 x [2Fe2S] cluster	NADH dehydrogenase, thioredoxin	0.992898	0.740685	1.20935	0	6.20501	1.14643	1.22739	0	4.03274	4.5671	0.913509	1.89811	0.644611	0	1.35529	0	0	0	1.76515	0	0	0.281543	0	0	0	2.02711	0	0	0.489098	0.672082	1.20227	3.22153	0	0	0	0	1.82551	0.988435	0	3.06756	0
WP_015572916.1	MVNIIINRQKVCVPEGTTILEAAKKIGINIPTLCYLKGINEIGACRVCIVEVAGTSRLVTSCNTPVTEGMEVFTNSARVREARKTNVELILSQHHTNCPTCVRSGNCKLQKVANDLNLVTDEYPIHYAKTRWTTTFPLVRDAGKCIKCMRCVQICDKIQSLNVWDVQNTGSHTTVDVSRGREIKASDCSLCGQCITHCPTGALQERDDVSRIFSMNGDLNNPDKITVVQIAPAVRAAWGEEFGLSREFATDKRLVAALRRMGFDYIFDTTFSADLTIMEEGTELIERLKHREEFQWPMFTSCCPGWVRFLKSQYPDMEGQLSTAKSPQQMFGAVTKSFFAAKLGVDPDNVTCISIMPCVAKKQEADLPTMYDGSVKDVDYVLTTREICRLIKAEQIDVF…	[FeFe] Group A2	[FeFe] Group A2	Evolving	Labile	2	[FeFe]-centre, 3 x [4Fe4S] clusters, 1 x [2Fe2S] cluster	NADH-dependent glutamate synthase	9.67308	8.19807	8.46543	9.95173	10.8588	7.45179	7.97802	4.77453	8.06548	5.48052	4.56754	5.69432	10.3138	3.01073	4.74353	13.8215	11.4983	12.9292	12.356	25.6643	3.47051	7.60167	28.3022	20.8095	9.90147	8.10845	10.6445	32.0794	3.42369	4.03249	10.62	5.79875	10.3699	11.5866	8.06885	13.0542	0	7.90748	1.082	7.36215	2.7536
WP_019262575.1	MVKLTMEPVTRIEGHAKITVQLDDDGNVVDTRLHVMEFRGFEKFLQGRPVEEVARIVPRICGICDVQHHLAAAKAVDQIFGFEDEKILPTAYKMREIMNWGSFMHSHALHFYFLAAPDLIIPDGTRKTRNVFQIIKDQPEIALQAIELRRNGLEIVRKIGGRPIHPTSSTPGGISTELDDETQKDLLQRAQRNVELAQATLDLAKPIFEEKIDLVNSLGYFGDTRHCGLVNDGVWDVYNGDVRIKDVDGSIYTEYKNLEYKDVVAEHVKPYSWLKFPYIKELGYPEGIYRVAPLSRINVADKMPDAAPLAQAAFEEFHDKFGYAQAPLLFHWARLIELLASAECAADALDQDLSGPKFPEELERTAGEGAGIVEAARGTLIHNYACDDNGLVTEANIVV…	[NiFe] Group 3c	[NiFe] Group 3c	Bifurcating	Sensitive	4	[NiFe]-centre, 3 x [4Fe4S] clusters	Polyferredoxin, [FeS] protein	1.87856	1.41849	0	0	6.20501	0	0	0	3.45663	0	0	0	0	0	18.2965	0	0	0	0	0	0	0	0	0	9.28262	10.1356	0	0	16.6293	0	0	0	1.15221	0	0	0	0	29.653	0.540998	0	0
WP_014117537.1	MSQGIMYVDGQRVAFDGEKNVLAVIRKAGIDMPTFCYYSELSVYGACRMCVVEDENGKIDASCSMEPKDGMRIRTNTARLLKHRRMILELLLASHSKDCTTCEKNGKCRLQELASRFGIRHIRFSDTRTRHELDESSPAIIRDPNKCILCGDCIRVCEEMQGMGIIDFARRGSHLQVMPAFDRKLSETDCISCGQCAAVCTTGAITIRNEIGAAWRALHNPDKRVVVQIAPAVRVAIGEAFGLPSGNNAIGKTVSALKMMGAEEVFDSIFGADLTVMEESKEFLARLNNGGPFPMFTSCCPAWIKYLETENSKYLKNISTCKSPMEMFAAVLKDQYAEIDRQDGRETFHIAIMPCTAKKMESARKDFQHGGKPDVDLVLTTQELINMIKESGIRFTELE…	[FeFe] Group A3	[FeFe] Group A3	Bifurcating	Labile	3	[FeFe]-centre, 3 x [4Fe4S] clusters, 1 x [2Fe2S] cluster	NADH dehydrogenase, thioredoxin	48.1839	42.1851	16.9309	121.23	58.9476	15.4768	32.5258	46.1538	107.732	32.8831	49.3295	55.0451	13.5368	21.0751	50.8235	0.62825	53.6588	51.0703	19.4166	9.87088	14.4605	84.3223	146.902	74.9143	139.858	122.978	61.9318	13.3664	28.3677	47.0457	91.3725	90.2027	8.06544	8.42665	48.4131	43.8248	6.69354	39.5374	7.57397	89.5728	15.6037
WP_028527755.1	MRGLDTPIKKIRREIFREIARIAFESDQEHFKGEIEAIPYHIVEERAKYRDSIYRERAVASERVRLAMGMSLRPENRAVHITAGVDKSNIDEKYYEPPLMQVIPSACDACEPNSYMVSDMCRGCVAHPCREVCPKGAIIVKKGKSIIDQEKCIRCGKCKQVCPYDAISKMERPCARACGVNAIDSDEQGRATINHKKCVSCGMCMVSCPFGAISDKSQIFQLCKALREEQFIVAEVAPAYIGQFGKHVTPEKLKAALLLLGFREVYEVALGADIGAVAEAHHYAQKVVTGELPFLLTSCCPSWSLLAKKHFPDLVDSVSQELTPMVATARSIKQKHPDARVVFVGPCASKKLEASRRTVRSDVDFVITFEELVGMFEAKGIDLEEMEPSGGNFAMNDAT…	[FeFe] Group B	[FeFe] Group B	Evolving	Labile	1	[FeFe]-centre, 2 x [4Fe4S] clusters	None	50.1397	45.775	20.5589	22.6176	24.82	55.6019	63.8241	58.8859	36.8708	15.5282	40.1944	37.9621	54.792	36.1287	29.8165	19.4758	38.3277	34.9088	68.8407	51.3286	57.2635	31.9552	33.6931	24.9714	13.9239	22.9739	53.2226	224.555	50.3771	46.3737	29.4556	27.0608	51.8493	249.113	60.5164	78.3253	75.4544	31.6299	80.6087	23.3135	54.1541
WP_022387742.1	MVTITIDGNVCEVPANTTILEAAASVGIKIPTLCYLKDLNEVGGCRVCVVEVEGAEHLVAACNNTVLDGMVVHTNTPKVRAARMTNVELLLSQHDSSCTSCVRSGNCTLQTVANDLGIYRLPYKKHVEHNSWDRTFPLIRDNEKCIRCLRCIQVCEKVQGLGVWDLTNRASHASVDVRGRKPITEVDCAACGQCITHCPVGALRERDDTERVFDAMADPNKVVMFQIAPAVRTSWGEELGLSREEATVERLCSLLHAMGASYVFDTDFSADLTIMEEGSELLHRIAEHDAGGEDVPALPLMTSCCPGWVRYVKARYPQFVSQVSTSKSPQQMFGAMAKTHYADVLGVEAKDVFCVSVMPCVAKKTEAALPTMVGESGDPDVDVALTVREVVRMIRASHM…	[FeFe] Group A2	[FeFe] Group A2	Evolving	Labile	2	[FeFe]-centre, 3 x [4Fe4S] clusters, 1 x [2Fe2S] cluster	NADH-dependent glutamate synthase	6.80291	6.09458	1.20935	5.42822	3.10251	1.71964	5.52324	7.95755	11.5221	0	0.913509	0	3.22306	0	8.80941	9.42375	3.83277	3.2323	5.29544	0	0.578419	1.83003	8.08635	4.16191	1.5471	7.43274	2.90305	2.67328	24.944	2.01625	2.40454	3.22153	62.2191	4.21333	1.34481	1.86489	0.608504	15.815	82.7727	3.68107	0
WP_003499089.1	MPIIDFKAAMCKHCYKCVRDCEVKSIMIRDGHAYIMPNRCILCGQCLISCPQSAKKMSSELEKVKSFIKEGRPVILSLSSAYIGLFQYKTRGQVKDALLKLGFTDVRDTAEAAAMATGEYVKLLEKGDMKNIITTACPSIVSLIEIHYPELIDYLAPVLIPSGIHARMLGEEYGEEARIVFAGPCIAEKEKMRAVSPDAVLTFEELKGWLEEEEIKIDECEDADFDERHLGANLRYPVSGGLLTSVETTKTKPDRYRKFYVSGVKDCLDVCEAMMTGEVKGCFIEMNACHGGCINGPATAATVSSFKVKLDLEATLPREPAELSALSEKARAVSIGRTFKNRARKEIMPTEEEIREILIKTGKTRPEQELNCGACGYPTCREKAIAVCQKKAELNMCIP…	[FeFe] Group C	[FeFe] Group C3	Sensory	Labile	3	[FeFe]-centre, 2 x [4Fe4S] clusters, PAS domain	Phosphatase, thioredoxin	6.81471	6.57961	2.4187	18.0941	9.30752	5.15893	1.22739	3.18302	1.72832	2.74026	2.74053	1.89811	1.28922	9.03219	3.38823	28.2713	19.1639	2.58584	12.356	17.7676	3.47051	4.92701	2.69545	35.3762	1.23768	4.05422	6.77379	1.78219	3.42369	3.36041	13.8261	0.644305	0	0.526666	1.34481	16.784	1.21701	4.94217	2.16399	1.84054	3.67147
WP_007070913.1	MGKSTVIPFGPQHPVLPEPIHLDLELQDEKVVRAVPSIGYVHRGLEKLVELRDFQQYVYVAERVCGICSFGHGWGYSRAVEEMMEIEVPPRAEWLRTIWHELSRIHSHLLWLGLAADAMGFESLFMESWRLREIDLDLIEQTTGGRIIFSVCKVGGVRRDIGGAVLKEMKRVLKDLSEKFLPMLNVFMDDDTVHSRLKGVGKLTMEEALELGCIGPMARASGILTDIRAAEKDSVYGQLHFQPVIETDGDCYARARVRLREVLRSVEIIEGCIDNIPDGPIDVKVRGVPPKRECFVRVEQPRGEALYYVKGNGTKFLERFRLRTPTNANLPALVKMLQGCDLADVPNIILTIDPCISCCER	[NiFe] Group 4e	[NiFe] Group 4e	Evolving	Sensitive	6	[NiFe]-centre, 1 x [4Fe4S] clusters	NuoL, NuoH, NuoC, [FeS] protein	37.0693	33.3155	177.169	36.1881	0	68.2126	0	28.6472	0.576106	0.913421	0	0	0	81.2897	63.0211	44.6058	0	0.646459	0	0	101.223	0.140772	0	0	0	47.975	0	0	0.978197	141.809	0	0.644305	0	105.86	0	134.272	0	0	0	0	128.501
WP_009279121.1	MVGHEHEQGERDVATKAVSLVVDGTPVTVPAGTSILGACRAAGSKVPTLCYLRELNEIGSCRVCVVEVKGRERLVASCNNCVEEGMEVLTNSPKVRCARRENVLLLLSQHDATCTTCVRSGNCSLQEVSNDLGLVGMPYPTILPHGSWPQGFPLIRNNDKCIRCMRCIQVCDKVQASHVWGITNRATHTTVDVADGASILNVDCTLCGQCITHCPVGALRERDDVSRVYDALQDPEVTTVVQIAPSVRTSWGDHWGLGETAGMGRLVSALRHMGFDYVVNTDVAADLTIMEEGTELLRHLGEGRPYPLMTSCCPAWVRFVKAHHPELVDDVSTSKSPQQMFGAVVKSYYAQLLGLDPHKVFSLSIMPCVAKKAECAYPNMNDACGDPDVDCALTVRELE…	[FeFe] Group A2	[FeFe] Group A2	Evolving	Labile	2	[FeFe]-centre, 3 x [4Fe4S] clusters, 1 x [2Fe2S] cluster	NADH-dependent glutamate synthase	0.960342	1.72416	0	2.71411	6.20501	0.573215	0.613694	6.36604	1.72832	2.74026	0.913509	0	0.644611	0	0.677647	0	0	1.29292	0	1.97418	0	0.985402	0	2.08095	0.309421	0.675704	0	0.891093	0.978197	0	0.200378	2.57722	0	0	1.34481	0	0	0	0.540998	3.68107	0.917866
WP_010250208.1	MTEYLVTKNSNCKNCYKCIRHCPVKSLKFTDGQAHIVKDECVLCGECYVVCPQNAKQIRQDVEKAKQLISENDVYVSLAPSFVAWFHDKSIYDMEQALKKLGFKGADETAKGAFIVKKQYEKMIEEKRSKVIISSCCHSVNTLIQRHYTDAIPYLADVISPMLAHAQLIKKEHAGCKVAFIGPCISKKEEAEKYEGFVDVTLTFDELEEWLGMENIAIESTGTESEKGRTKSFPRSGGIIDSMDKNENYHYLVVDGMENCINALDNIDKGELDNCFIEMSACRGSCINGPVLKRKNHNIIGAILAVNENTGANDYTIAMPDRKSLKKEIRLEGVKKIMPGSSAIEEILKKMGKTSKEQELNCGSCGYDTCRDKAMAVLTGKADLTMCLPYLKEKAESFS…	[FeFe] Group C	[FeFe] Group C3	Sensory	Labile	3	[FeFe]-centre, 2 x [4Fe4S] clusters, PAS domain	Phosphatase, thioredoxin	6.86281	5.7843	7.86076	13.5705	3.10251	13.1839	3.68216	3.18302	0.576106	7.30737	6.39456	1.89811	0	0	3.38823	0	19.1639	11.6363	0	0	5.78419	14.6403	4.04317	2.08095	3.71305	9.45985	10.6445	8.91093	8.31467	10.7533	3.80719	9.66458	0	0	2.68962	4.66222	2.43401	5.93061	2.70499	9.8162	0.917866
WP_012662530.1	MKDAIVAIDEALCTGCGRCKEICPVGAVSGTPGQPHKIDQKKCIICGQCVQICSGYESILEEYAIDRATRLEQRGMLDTVQEPLFAAHYRGDVKKLLAALEDEKTVTLVQCAPAVRVALGEEFGLAYGVLTPGKMATSLRRLGFDRVYDTNFAADLTIMEEGAELLARLEKNEGLPMFTSCCPGWVKYLEDHYPDLLPHLSSCKSPQQMGGVLFKTYGAELAGVEPGCVYSVAIMPCTCKKYECDRDGMDSSGFRDVDLVITTRELAQLLKHKGIKFAGLADGEFDQPLGAYSGAGNIFGSTGGVMEAALRSSLELATGVPLDSVELNYLRGGEGFRVAQVEHQGVQLKVGIVAGIQHVAPLLDKIQQGEADFHFIEVMCCPLGCVSGGGQPKTVLPQQ…	[FeFe] Group A4	[FeFe] Group A4	Evolving	Labile	3	[FeFe]-centre, 2 x [4Fe4S] clusters	FeS protein, FeS protein	0.432764	0.248517	0	0	1.55125	0	0	1.59151	0	0	0	0	0	3.01073	0	0	0	0	0	0	0	0.281543	0	2.08095	1.23768	0	0	0	0.489098	0.672082	1.8034	0.644305	0	0.526666	0	0.932444	0	0	0	0	2.7536
WP_005941153.1	MAFTNNIMIVRHKLLTELVKLWKNGELTTDKIDRLPLELSPRRSKHAGRCCVHKERAVWKYKSLPLLGLDMDDETDELTSLSEYAARALDRAENGMPKDNIMCVIDEACSACVQINYEITDLCRGCTARSCQYNCPKGAVHVHADTGKAWIDHDTCISCGICHKSCPYHAIVYIPVPCEESCPVKAISKDEHGIEHIDEDKCIYCGKCMNACPFGAIFEISQTFDVLQRIRKGEKVVAIVAPSILGQFSTTIEQVYGAFKQIGFTDVIEVAQGAMETVENEAHELIEKLEEGQKFMTTSCCPSYIELVNKYIPDMKKYVSTTGSPMYYAARIAKKKHPDAKIVFVGPCVAKRKEAQRDEAVDFVMTFEEISSIFDAMEVNLEIVQPYAMEFSSVREAHG…	[FeFe] Group B	[FeFe] Group B	Evolving	Labile	1	[FeFe]-centre, 3 x [4Fe4S] clusters, 1 x [2Fe2S] cluster	None	6.4482	7.81011	0.604674	2.71411	0	1.14643	0.613694	9.54906	5.76106	0	0	45.5545	34.809	0	6.77647	0	0	0.646459	0	1.97418	5.78419	27.5913	0	2.08095	0.618842	0	2.90305	0	0	5.37666	0	0	0	0	0	0.932444	0	0	0	9.20268	0
WP_013907653.1	MKKELSPVVKVDAEKCNNCHKCIAVCPVKFCNKASESAVEINHNMCIGCGACIEVCETGARQWVDDFDAFMKDVKKTNMVAIVAPAVAANFPHNYLRLNGWLKSIGIKAVFDVSFGAELTVKSYVEYLKKKQPNMIIAQPCPAIVTYMQIYQPELLEYLIPVQSPMLHTIIMIKHFYPEYKDFKVAVISPCLAKKREFDETGLGDYNVTFKSIDKYFREKNIQLSSYPEVDFDNPPAERAVLFSSPGGLMRTAERWIPDIKERTRKIEGVTMVYSYLKKLPELVRKGLNPLLVDCLNCELGCNGGPGSLRQHASPDEVEFYIEKRRKEMQERYKARFGNKVSAKKIEKVVNKYWKEGLYDRSYLNLKENNELKMPSERELKKVYETMHKYSEKDLYNCM…	[FeFe] Group C	[FeFe] Group C2	Sensory	Labile	1	[FeFe]-centre, 2 x [4Fe4S] clusters, PAS domain	Fusion with methyl-accepting chemotaxis protein	1.54796	1.59116	1.20935	0	1.55125	0	0.613694	0	2.30442	0	2.74053	0	0	0	2.71059	4.39775	0	6.46459	1.76515	0	2.89209	2.95621	0	4.16191	0.309421	0	2.90305	0	0	2.01625	0	1.28861	0	3.68666	2.68962	1.86489	0	2.9653	0	1.22702	4.58933
WP_029502581.1	MNVIGFKEAKCKNCYKCVRNCDVKAITVKDAQAYIMNDKCILCGHCLEVCPQNAKTLISDLERVKEYIKEGHQTIISLAPAYLGVLKYNTPGQVISALLKLGFTAVRETAEGAAYVTREYDKLIAAGEMENIITTCCPSLNDLVEIYYPSLTKYLAPVISPMIAHGKIIREEYGPNVKVVFLGPCISKKREAESDPRTVGIIDAVINFKELEEWLLEEGIDILEQPDTPPSNPNPLVNRLYPISSGVLSSVVASRNTSDRYRKFYVHGIKNCIDLLESMNRGEVTGCFIEANICNGGCIKGPAIDRARISRFKVKLDMEESIPKTPIKDEDFYAKFPILLEKHFFDRSPKDPVPTEEEIMQILRKIGKTKTEDMLNCGACGYATCRDKAIAVYQGKAEL…	[FeFe] Group C	[FeFe] Group C3	Sensory	Labile	3	[FeFe]-centre, 2 x [4Fe4S] clusters, PAS domain	Phosphatase, thioredoxin	2.13654	1.7374	0.604674	3.61881	1.55125	8.02501	0	0	0.576106	3.65368	3.65404	0	1.93383	0	0	0	0	0.646459	5.29544	0	0	0.84463	0	0	0.618842	0.675704	1.93537	14.2575	1.4673	2.01625	0.601135	2.57722	1.15221	2.63333	1.34481	5.59466	0.608504	1.97687	0	1.22702	2.7536
WP_028044437.1	MRGVYSSVTDIRRKIFTEIARMAYNGDYSVIEELPYKIIPGEVATYRESIFLERAIVGERLRLAMGLPLRPIDQHTILSTGITNSIIAEKYYEPPLINIIKFACHACPDNIVKVTDACQGCLAHPCKEVCPKNAIQIVNGRSVIDQDKCIKCGLCIKNCPYGAIMKMERPCAKACGMDAIKTDEHGHADIDYDKCVSCGMCLVNCPFGAISDKGQIFQLITAMKEGYKVYAAVAPAFVGQLGPKVTPEKLKGAMKTLGFEDTIEVAIGADLCTVEEAEDFLSKVPQEQPFMGTSCCPAWSVMAKKLFPEFKPYISMALTPMVLTARMIKKDHPDCKVVFIGPCAAKKLEASRKSVRSDVDFVLTFEEIMGMFEAKDIHFEDLTEVEQLGEASADGRGFA…	[FeFe] Group B	[FeFe] Group B	Evolving	Labile	1	[FeFe]-centre, 2 x [4Fe4S] clusters	None	67.281	60.5447	50.1879	56.0916	71.3576	96.8733	111.692	106.631	71.4371	58.4589	73.0807	32.2678	80.5764	60.2146	60.9882	10.6803	34.495	127.999	56.4847	35.5352	63.0477	37.1637	29.6499	143.586	54.7675	80.4088	55.158	98.0202	61.1373	78.6336	27.6522	75.3837	69.1323	95.8532	102.205	64.3386	139.347	59.3061	101.167	46.0134	85.3616
WP_007288799.1	MEMVNITIDGQKVQVPKNATVLEAARSCGVKIPSLCYHPELRPEGACRVCMVEVEGARTLVASCVYPVSEGMVVRTNTPAVRQARKLVVELLLANHPQDCLSCQRNLNCELQTIAADLGIRKIRFDGEKKSYPLDADNPSLVRDPSKCILCGRCIRACSERQGVHVYSFVNRGFNTTVAPAFNQGLHQVACTYCGQCASVCPTGAIVEKDDTAAVWQALSDPAKHVVVQTAPAVRVALGEALGMGTGSIVTGKMVAALRRLGFDKVFDTDFTADLTIMEEGSEFLDRLAKGGKLPMITSCSPGWVNFIELMYPDLLDHLSTAKSPQQMFGALAKTYYAERVGIDPKDIVSVSIMPCTAKKAEAVRPEMRASGYQDVDYVLTTRELARMIREAGIDFAGL…	[FeFe] Group A3	[FeFe] Group A3	Bifurcating	Labile	4	[FeFe]-centre, 3 x [4Fe4S] clusters, 1 x [2Fe2S] cluster	NADH dehydrogenase, thioredoxin, thioredoxin	1.19667	0.824606	0	0	6.20501	1.14643	0	3.18302	0	1.82684	0	0	2.57845	0	2.03294	1.2565	0	1.29292	0	0	0	0.281543	4.04317	8.32381	1.23768	1.35141	1.93537	0	0	4.03249	1.20227	1.93292	0	0	4.03442	0	0	3.95374	0	1.22702	0
WP_014296384.1	MNGNIIYTEPEKCTLCYNCIRVCPVHANKVYDDYVEPDSDLCIKCGQCILSCESQARRYRKDIDIFEDFKNKNEYLVAIIAPAYVGDLENTTPNQYAAALKKLGFNEVHEVAFGAELTTLEVLKEMEEKKPEYVIMSPCPSLINYLEKWQPDLLQYFSESYSPMLSTAAFVKKEKPNAKVVFISPCTAKKSEIEHESIKGLVDIVLTFEEINELFEKNNIKPSVLEEELFDGYQPNYATLFPVSGGLTKTAASYLKNKKIDDIMLEEDVLVIEGKERSIPFFKDFEKNIKAGKKDVTPKFIDILFCEGCIDGPATRKDIPLFEKRAKIIKYTKDRLVKNKFLTKDGKQVAQKTISLKDTKKIYEEMNLKRYFKAKPVNYKEPPESFIVKILEKTNRLND…	[FeFe] Group C	[FeFe] Group C3	Sensory	Labile	1	[FeFe]-centre, 2 x [4Fe4S] clusters, PAS domain	Fusion with methyl-accepting chemotaxis protein	6.35553	6.05955	7.86076	2.71411	12.41	2.29286	1.22739	0	6.91327	0.913421	4.56754	5.69432	0	0	12.1976	5.65425	3.83277	15.515	8.82573	7.8967	4.62735	7.17936	2.69545	8.32381	4.95073	0	9.67684	3.56437	0.978197	10.7533	7.81475	1.93292	3.45662	3.15999	8.06885	22.3786	6.69354	8.89591	2.16399	1.84054	9.17866
WP_013275360.1	MKTLKINGREVAFSDEKNLLEVIRKAGIELPTFCYHSELSTYGACRMCLVEDKRGNLIAACSTPPREGMEIKTHTKRLLKQRRMTLELILAEHDRDCTTCGKNGDCKLRKLSHDLGVEEIRFGTKENYLPIDDSSEAIVRNPNKCILCGDCVRMCEEVQGIGVIGFAHRGAKAVVTPAFNKNLCEVECVDCGQCSAVCPTGAIVVKSHIDKVWDALNDDNKVVIAQIAPAVRVAFGEAFGLRPGESTEYLIVSALKAMGFDMVFDTCFAADLTVIEEGHEFLERLEKGENLPLFTSCCPAWVKFVEFNYPSFLNNLSSCRSPHQMFGSFTKNYYAKELGVSRENVYVVSIMPCTAKKAEAAREELGVDGNPDVDAVLTTRELIRMVREAGIVFKDLKEE…	[FeFe] Group A3	[FeFe] Group A3	Bifurcating	Labile	3	[FeFe]-centre, 3 x [4Fe4S] clusters, 1 x [2Fe2S] cluster	NADH dehydrogenase, thioredoxin	0.990048	0.74961	0.604674	0.904703	6.20501	0.573215	1.84108	0	1.72832	2.74026	0.913509	0	0	0	2.71059	0.62825	0	0.646459	1.76515	0	0	1.12617	4.04317	0	1.23768	4.72993	1.93537	0	1.95639	0.672082	0	0.644305	0	0.526666	1.34481	2.79733	0.608504	0.988435	2.16399	0.613512	0.917866
WP_015528722.1	MVNITIDNQKISVPSGTTIMEAAAKLGTPIPKLCYLKDINEIAACRVCVVEIEGKDRLVTSCNNVVTEGMVIYTNSPKVRIARRQTVQLILSQHDCKCATCVRSGNCTLQQVANDLNLIDLPFKERFEDTPWDKTFPLIRDSRKCIKCMRCIQICDKIQGLNIWDVTSTGSRTTINVNGNKKINEVSCSLCGQCITHCPVGALRERDDTEDVWSAIADKKKVVVAQVAPAVRAAWGEALGLSREEATSGKIMDALKKIGVDYVFDTSFSADLTIMEEGNEFLQRFTKGELKLRPMFTSCCPGWIRFIKSQYPHLVPQLSTAKSPQQMFGAIMKTYFAQSIGVAPEDIYTVSVMPCVAKKGERNMELFYGEYAGHDIDTVLTTRELTRMIRAAHIDPKIL…	[FeFe] Group A2	[FeFe] Group A2	Evolving	Labile	2	[FeFe]-centre, 3 x [4Fe4S] clusters, 1 x [2Fe2S] cluster	NADH-dependent glutamate synthase	100.02	97.5871	55.63	79.6139	72.9089	81.9697	48.4818	92.3076	194.148	42.0173	94.0914	85.4148	18.6937	213.762	56.2447	120.624	61.3244	42.6663	31.7726	203.34	159.065	66.1627	56.6044	141.505	37.4399	116.221	108.381	17.8219	104.667	127.696	65.5237	65.0748	199.332	187.493	135.826	151.988	86.4075	32.6183	117.397	10.4297	273.524
WP_005367839.1	MITLEINSKAIEVEEGTTVLEAAKKMNIKIPTLCHMDLHDIRFMNKHASCRVCLVEQEDSGKLIPACATFVKDGMKIKTETARAVKARRTMVELLLSDHPNSCLTCARNLDCELQKLASDLGVRAIKYQGEQSTYEIDDNSHSIVRDANKCILCKRCETMCNEIQTVGALTDVGRGFNTYVGSAFNDAMYETTCTFCGQCLAVCPTGALTEVNNTPHVWDVLHSDKTVIVQVAPAVRVALGEEFGMEPGTIVTGKMINALKYLGFDKVFDTNFAADLTIMEEASEFVHRLNNGGKLPILTSCCPSWVNFFEHQFTDFLDIPSTCKSPHEMFGAIAKTYLAQKLNIDPKNMVLVSVMPCVAKKYEAARPELGNGAGKDVDYVITTRELALMIKEAGINFG…	[FeFe] Group A3	[FeFe] Group A3	Bifurcating	Labile	3	[FeFe]-centre, 3 x [4Fe4S] clusters, 1 x [2Fe2S] cluster	NADH dehydrogenase, thioredoxin	0.745343	0.632846	0	1.80941	0	1.14643	2.45477	6.36604	0	1.82684	0	0	1.28922	0	0.677647	0	0	1.93938	1.76515	0	0.578419	0	0	0	0	0	0.967684	0	0	0.672082	0.400756	0	0	0.526666	0	0	2.43401	1.97687	0	0.613512	0
WP_023162310.1	MSGQFMIIDNIPVEINGEKNILELIRKAGIDLPTFCYHSELSVYGACRMCMVEDKRGRMQAACSTPPQAGIEIYTNTPRLRKYRKNILELLLANHCRDCTTCEKNEHCKLQDLAKRFKIKKVRFKNTSINKKIDNSSVCIVRNRSKCILCGDCVRVCEEVQNVGAIDFVKRGSNMTVTTAFDEPIANSNCVGCGQCAAVCPTGAIVVKDDTAELWEALSDKNTKVVAQIAPAVRVGLNEELGEENGENEMGKIVAALRRMGFDEVFDTSTAADLTVLEETAEFTSRLEKNESLPLFTSCCSAWVNYVENTHPELMKYVSTCKSPMEMFASVLKEYYKNSDKKIVVVAVMPCTAKKYEAKREEFSKNGVPDVDYVITTQELISMIRQAGIVFPELEPEAV…	[FeFe] Group A3	[FeFe] Group A3	Bifurcating	Labile	3	[FeFe]-centre, 3 x [4Fe4S] clusters, 1 x [2Fe2S] cluster	NADH dehydrogenase, thioredoxin	5.48013	4.86308	4.23272	6.33292	20.1663	14.3304	1.84108	4.77453	4.03274	9.13421	12.7891	5.69432	5.15689	3.01073	12.8753	0.62825	0	20.6867	12.356	0	0	7.74244	6.73862	4.16191	1.5471	7.43274	5.8061	0.891093	9.29287	0	2.40454	0.644305	0	5.26666	5.37923	6.5271	3.65102	11.8612	0	12.2702	1.83573
WP_009145673.1	MAQIYEALQKAGFAEVVEVGIGADITSVKEAEEYLDKVPAKQGFMTSSCCPAFVKLIKTQVPEAADKISDTPSPMLTCAELIKEKYPYAVTVFIGPCIAKKVEAREHRETINYVLSFEEIMCMLEGKDIKFAEMSGDAAYERDASKLGLSFPLTAGVSAAVHDTVAAMGGEVHNAQYCSGLDKCRDTVKAAAAGKLDCSYIEGMACPNGCIDGPDTVGDFHITKVALTKYAAAAPNKQAAQDKHTK	[FeFe] Group B	[FeFe] Group B	Evolving	Labile	1	[FeFe]-centre, 2 x [4Fe4S] clusters	None	5.95811	1.58637	0.604674	0	0	0	5.52324	0	41.4796	0.913421	18.2702	0	2.57845	0	2.71059	0	0	0	0	177.676	0	41.3869	8.08635	0	0	0	0	0	12.7166	0	0	1.93292	0	0	0	0	0	0	0	0	0
WP_028026422.1	MTRSVIDPITRIEGHLRVEMEVDNGIVQDAWVSGGCFRGMELVVQDRTPEDAAQIVERICGVCPVSHAHASSIAGDKAYGITISNNARIVRNLLEGAQFLHSHILWLYNLAALDYVNPLNALNANVDEAYAVALENGLALHSDLNQLYDKLGAFAKNGQLSIFSGNWFEADKGQAYKLTPELDLILTSHYLEALKMQARASEMAALLGGKMPHVMTSIPGGNMWVPTESKLDDLLAMATEVRDWVNDTVLADTVALAGPYADALTWGKGCGRYIAWGVFEGQGWPYGDDYIEQMKNRYLPMGVLDEKFGVTDVQEDLIQEYMGRSWYEGSETYTSPYFVTDPAYTDYNVDDRYTWVKCPTYDGKPMEAGSMSRIFAAYVRGVPFIKENVDAVLGILGAK…	[NiFe] Group 1a	[NiFe] Group 1i	Anaerobic Uptake	Sensitive	3	[NiFe]-centre, 3 x [4Fe4S] clusters	Cytochrome b	0.506478	0.335929	0	0	0	0	2.45477	0	1.15221	0	1.82702	0	0.644611	0	0	0	0	0.646459	0	0	0	1.54849	2.69545	0	0	1.35141	0	0.891093	0.978197	0	0	0	0	0	1.34481	0	0	1.97687	1.62299	0.613512	3.67147
WP_002848484.1	MSELLIVRPDKCVGCNACVRSCPAPEANITKIIDGGRFITMVNNDRCIGCGECVKNCNHGARDYIDDTDECMSRMKKEKMIILATPAIKAVFPTKWKGILDWFRKQGCMIYDGSFGADICSWAHLRAIEQKKVGNVITQPCASIVKYVETYQPKLLANLSPIHSPTLCSATYIKKYLNRNNPIAALTSCIAKKYEFEETGLVDYNVTFKKLGEYFEKNGISIPVSNTDDYEYRFDDQQGQVGAVYSRPGGLRDNLWLHNPDINITTSEGVGKVYRELDMYAEMPDFKHPEVFDVLSCEFGCNIGPGAGANQTMFDVMVTMKEVENEAKSRRKSGFMGRGDDRLFKKFDDELKLNDFLRNYKPVTPTPVPTERQLENVYESMGKIEEDDKHFDCRACGYR…	[FeFe] Group C	[FeFe] Group C2	Sensory	Labile	1	[FeFe]-centre, 2 x [4Fe4S] clusters, PAS domain	Fusion with methyl-accepting chemotaxis protein	0.470027	0.276241	0	3.61881	0	0	0	0	0	0.913421	0	0	0	6.02146	0	0	0	0	0	0	0	0.281543	1.34772	0	0	0	0	0	0	0	2.40454	0	0	0	0	0	0	0	0	0	0.917866
WP_013979777.1	MGKATVIPFGPQHPVLPEPLHLDLVVEDETVIEAIPQIGFIHRGLEKLVETRDYNQFIYVAERICGICAFGHSMGYAETVEKLMGVEIPERAEYLRVIWHELSRIHSHVLWMGLAADAFGFESLFMHCWRLRERVLDIFEKTTGGRVIFSVVKVGGVVRDIDDAMFAEMKRTLEGIKDDYRQICNAFLKDSSVKNRTVGVGYISPEDAFALSMVGPFARASNVSNDARSLGNGGYGKLSDFQPVLDTQGDCYARVKVRALEVLQSIDIIEEMIAKIPAGDIAVDVKGSPSAGAEAANLVEQPRGECYYYARGNGSKYLERMRMRTPTSQNLAGMTSALAGCDLADVNMIVLTIDPCISCTER	[NiFe] Group 4e	[NiFe] Group 4e	Evolving	Sensitive	6	[NiFe]-centre, 1 x [4Fe4S] clusters	NuoL, NuoH, NuoC, [FeS] protein	2.02236	1.675	6.65141	0	0	9.17144	4.90955	4.77453	1.15221	1.82684	0	0	6.44611	0	0.677647	0	0	3.87876	5.29544	0	2.89209	5.20855	0	0	0.928262	2.02711	1.93537	2.67328	0	0	0.601135	2.57722	4.60882	1.58	0	0.932444	3.65102	0.988435	1.082	1.22702	2.7536
WP_015518595.1	MVNIKINGIEYAVEEGTTILEACRQNGIRIPTLCWLKDINAIGACRICVVEMTGARSLVASCVYPLSKFDEGKNILTHSPAVLQSRKMTLHLLLSDHNMDCLACSRNGSCELQELCKELGVDDTTFFEGEKNEYDIDYSSKHMFRDNNKCIHCRRCIAACDKLQGIGVIGANNRGFKTSIDCAFDLDLAETACVSCGQCITACPTGALAEKDDTDKVWDALADPEKVVVVQTAPAVRASLGEAFGYPMGTPVEGKMVAALRRLGFNAVFDTNFGADLTIMEESHEFLDRVTNGGVLPMITSCSPGWIRFCEAYFPEFIPNLSSCKSPQQMNGAITKTYWAKKMGIDPKNIVSVSVMPCTAKKFEIGREDQSAAGVPDVDISITTRELVKMINRAGLRFR…	[FeFe] Group A3	[FeFe] Group A3	Bifurcating	Labile	4	[FeFe]-centre, 3 x [4Fe4S] clusters, 1 x [2Fe2S] cluster	NADH dehydrogenase, thioredoxin, thioredoxin	16.8637	20.6871	1.81402	1.80941	4.65376	9.17144	1.22739	9.54906	2.88053	18.2684	3.65404	1.89811	1.93383	0	286.645	0	3.83277	4.52521	10.5909	1.97418	0.578419	4.08238	5.3909	2.08095	93.4451	4.05422	1.93537	7.12874	1.95639	10.7533	0	1.28861	1.15221	1.58	9.41366	3.72977	0.608504	13.8381	1.62299	45.3999	3.67147
WP_004627876.1	MQTFKDLYNRLVKAAVQNRVEEEVEEIRKQDFDPHQLDCLLHPKDYGPVWRLGDCDCCDDDGKNCPTKCLFDALEKDEKGNVSINVEKCVGCSGCVDRCKAEKLVGSRDILPTLDAVNNAQGPVYAMIAPAFTSQFSEEVTPGKLRSAFKRLGFAGMLEVALFADILTLKEALEFDRNILDEKDFLLTSCCCPMWIAMIRRVYSQYVPHVPGSVSPMIACGRSIKLLEPNAVTVFIGPCIAKKAEAREKDIADAVDFVLTFQEVQDIFEAAGIDPARLQEDSRDHSSKAGRIYARTGGVSEAVQTTVERLNPHRKISVKARQADGMPACKELLGALKEGRITENFLEGMGCVGGCVGGPKAILNREDGRKNVIAYGSQALYSTPIDNPYVIDLLHRLGF…	[FeFe] Group B	[FeFe] Group B	Evolving	Labile	1	[FeFe]-centre, 2 x [4Fe4S] clusters	None	0.515811	0.344005	0	2.71411	0	3.43929	0	0	0	0	0	0	0	0	0	0	0	0	1.76515	0	0	0	0	2.08095	0	0	1.93537	0.891093	0	0	0	0	0	0	1.34481	0	0	0	0	1.22702	0
WP_024286662.1	MRELSESDRFTITVNNREIQVFGGLTILQALVMEDIEVPSLCHDIRLKRSNGSCGLCVVEVGTEAPRDVKACLTPVQPDMVITTHSPRLEEYRKVRLQQLLCDHNADCVAPCVETCPANIDIQTYLSHVADGNYQAAIHVIKDRNPFPSVCGRVCPHPCESECRRSLVDEPVAINYVKRFAADWDMAQDEPWIPRVDAPTGKRIAVVGAGPSGLSAAYYSAISGHAVTVFEKQDHAGGMMRYGIPEYRLPKATLDQEIGVIQALGVQIVTGKALGTHLSLEDLKRDFDSVYLSIGSWRATPLGIDGDRNERVELGIDYLRHIAKGSTRSRGDTVVVIGGGNTAIDCVRTALRKGAKSVKLIYRRTRDEMPAEAFEVAEALHEGVEMIFLTAPTKITTAE…	[FeFe] Group A1	[FeFe] Group A1	Evolving	Labile	1	[FeFe]-centre, 3 x [4Fe4S] clusters, 1 x [2Fe2S] cluster	None	2.5998	2.76445	4.23272	2.71411	1.55125	3.43929	1.84108	3.18302	1.15221	0.913421	1.82702	1.89811	1.28922	0	2.71059	1.2565	0	3.2323	5.29544	1.97418	1.73526	2.11158	5.3909	2.08095	1.85652	4.05422	4.83842	1.78219	7.82557	1.34416	2.40454	6.44305	1.15221	0.526666	1.34481	2.79733	1.82551	0.988435	1.62299	3.06756	2.7536
WP_015513457.1	MNKKFFHSVYLDESLCKGCINCIKRCPTQAIRVRNGKARITSQFCIDCGECVRTCSHHAKKIHIDSLDILNNYAYTVALPAPSLYAQFNNLDDVNILLTALIYLGFDDVYEVGAAAELVSEASRKYVDEHKDQWPFISTACPSVVRLIRVRFPNLIDHLLPILPPIEVAATLARKRAMAKTGLPADKIGIIFISPCPSKVTYVKSPLGTTRSEVDGVLAVKDVYPLLLPHMKIAEQHPMDLAISGRIGIGWGCSGGEAGGMITDSYLAADGIENVIRVLEDLEDEKFAKLQFIELNACSGGCVGGVLNVENPYVAKAKIKRLNKYLPVARTHSEDIPQKVELGWHTTVEYEPVFRIGDTMLESITKMKQIEELCNEFPGLDCGSCGAPSCRALAEDIVR…	[FeFe] Group C	[FeFe] Group C1	Sensory	Labile	2	[FeFe]-centre, 2 x [4Fe4S] clusters, PAS domain	Histidine kinase	18.0667	16.2756	9.07011	19.9035	9.30752	37.259	27.6162	20.6896	25.3486	19.1818	33.7998	20.8792	10.9584	33.118	20.3294	11.9368	11.4983	31.03	40.5984	11.8451	11.5684	17.5965	6.73862	12.4857	11.758	18.244	1.93537	36.5348	26.9004	21.5066	12.6238	8.37597	18.4353	0.526666	1.34481	25.176	17.6466	22.734	20.0169	36.1972	25.7003
WP_022865058.1	MAEKVVIDPLTRIEGHLRIEMETEGEQIKKAWSVSTQFRGIETIVQNRDPRDVWAFVQRICGVCTSVHAIASITAVEDAIGSNPPENARLIRSLVLGSQEIQDHVIHFYHLHALDFVNVPNAAKADPAKALEFAHSIGSKWRGNNLKRFTEVRDTVKKILESGQLSVFTGGYWDHPDYRLPPEADLMCVAHYLDALEFQRSMIRINTVFGGKNPHPNFLVGGMACSIDPQSSESINQVQMDQVKTWVEEINEFVKDCYYPDILALGGVYKDYFDIGATHPNYLAVGLAGSMFAGDPNKSRLSSPHTAIKPGVIFDDDLTKVHPFDPHKIEEFITSAWYEYSVGDKKGLTPDKGETTVKYTGPQPPFKWLGDRDKYTWSKAPRYDGKPMQVGPVARMLLA…	[NiFe] Group 1f	[NiFe] Group 1f	Anaerobic Uptake	Unknown	3	[NiFe]-centre, 2 x [4Fe4S] clusters, 1 x [3Fe4S] cluster	Cytochrome b	0.318778	0.128195	0	0	0	2.86607	0	0	0	0	0	7.59242	0	0	0	0	0	0	0	0	0	0	0	0	0	0.675704	0	0	0	0	0	0	0	0	0	0	0	0	0	5.52161	0
WP_013403323.1	MKNLHSIMLDKEKCKGCTNCIKRCPTEAIRVRNSKARIIDQRCIDCGECIRTCPYHAKYAITDSLEEINKFQYKVALPAPSFYAQFEVDDVNKLLYALLELGFDDVFEVAKAAEIVTHFTKQFILSEKNKKPIISSACPAVVRLIQTKFPDLIENILPLASPMEVAAYIAKKKIHKEKGIEEDKIGAFFISPCAAKMTYVNSPLGFERSYVDGVIAIKDVYGLVRSKLREIKDVKPLSIASGKGIGWAASGGESLALEIEEYVNVDGIHNVAKVLEEIENGKLKDITYFEGLACSGGCVGGPLAVENPYVAKNRIKRLSSKLKDKEESLSAWTEEIINSFSLKLEDVLFEKELETNPVLELDSDIERAMEKFEKVNNILNMLPGLDCGACGSPTCKTLA…	[FeFe] Group C	[FeFe] Group C1	Sensory	Labile	2	[FeFe]-centre, 2 x [4Fe4S] clusters, PAS domain	Histidine kinase	0.183184	0.0047354	0	0	0	0	0	0	0	0.913421	0	0	0	0	0	0	0	3.87876	1.76515	0	0	0.140772	0	0	0.928262	0	1.93537	0	0	0	0	0	0	0	0	0	0	0	0	0	0
WP_013486450.1	MKDSIVIDGRRVELDGEKNLLEVVRKAGIDLPTFCYYSCMSVYGACRMCTVEDSRGRTMAACSTPPKPGMEIRTNTERLRKYRRMILELLLSNHNRDCTTCEKNGSCKLQELALRFGVRKVRFRQEVRDLPLDTSSPAILRDPQKCILCGDCVRMCAEVQGVGALAFAYRGSDMEVTTAFHRSLGDVGCVGCGQCAGVCPTGAITVRDDTARAWKALQDPQTRVVAQIAPAVRVAIGEEFGMEPGEVTLGKLVAAMRMLGFDEVYDTGLGADLTVTEEGNELLDRLQNGGRFPMFTSCCPGWVTYARNRHPELAENISTCRSPMGMFGAVLRDYFSGKDTAEGKKTFSVAVMPCTGKKLEAGWDEMVTEIGKDIDVVLTTQEIAQMIREGGIDFAALES…	[FeFe] Group A3	[FeFe] Group A3	Bifurcating	Labile	3	[FeFe]-centre, 3 x [4Fe4S] clusters, 1 x [2Fe2S] cluster	NADH dehydrogenase, thioredoxin	1.89689	1.55379	1.81402	1.80941	1.55125	2.29286	1.84108	0	2.88053	1.82684	0	3.79621	3.86767	0	2.03294	2.513	0	1.29292	1.76515	1.97418	0.578419	6.4755	6.73862	0	2.78479	3.37852	3.87074	2.67328	1.95639	0	0.601135	0.644305	0	0	4.03442	2.79733	1.21701	0.988435	1.082	4.29459	3.67147
WP_009146318.1	MVNLTIDGQKVSVPQGTTIMQAAATVGIEIPRLCYLKGINEISACKVCVVEIQGQNRVVTACTTPVQEGLVVYTNSPKARSIRRTNVELILSQHDCMCATCVRSGNCSLQTLANDLGIYDIPYERDVVDTPWNQEFPLIRDSKKCIKCMRCVQICDKVQKLHIWDVQNTGARTTVDVAGNVSIEDSDCSLCGQCITHCPVGALKERNDVPKIYDVLADPNKVTVVQVAPAVRTSWAEAFNLPPELATEGRMVATLKKIGFDYVFDTCYAADVTIMEEASELLEHLQKPQDHSWPMFTSCCPGWVSYVNKTHPYFVPNLSTTKSPQQIFGALAKSYFAQKKGLKPKEICSISIMPCVSKKREAALFSMRSSGTHDVDIVLTTREFIRLLRAEHINPAMLD…	[FeFe] Group A2	[FeFe] Group A2	Evolving	Labile	2	[FeFe]-centre, 3 x [4Fe4S] clusters, 1 x [2Fe2S] cluster	NADH-dependent glutamate synthase	12.677	7.40159	7.25609	7.23762	1.55125	2.86607	15.3423	0	67.4044	4.5671	48.416	0	7.73534	0	0.677647	6.2825	3.83277	18.1009	3.53029	258.617	4.04893	70.3859	9.43407	12.4857	1.5471	3.37852	3.87074	0.891093	16.6293	2.01625	3.40643	6.44305	1.15221	2.10666	5.37923	6.5271	1.82551	1.97687	0	4.29459	6.42506
WP_007748547.1	MAFTNNIMIVRHKLLADLVRLWKNDQLIEKIDRLPVELSPRRSKPMGRCCIHKERAVWRYKTFPLMGLDMTDEHDEVAPLSDYARMALSRPEPNKENIMCVIDEACSSCVQINYEITNLCRGCVARSCYMNCPKDAIRFKKNGQAMIDHDTCVSCGICHKSCPYHAIVYIPVPCEESCPVKAISKDEHGIEHIDESKCIYCGKCLNACPFGAIFEISQTFDVLQHIRKGEKLVAIVAPSILGQFNTTIEKVYGAFKEIGFADVIEVAEGAMQTTSNEAHELLEKLEEGQKFMTTSCCPSYIELVEKHIPGMKPYVSSTGSPMYYAARIAKEKHPDAKIVFVGPCIAKRKEVRRDEAVDYILTFEEIGSILDGFDIQLEQMQEFSILHTSVREAHGFAQA…	[FeFe] Group B	[FeFe] Group B	Evolving	Labile	1	[FeFe]-centre, 3 x [4Fe4S] clusters, 1 x [2Fe2S] cluster	None	4.55453	3.95472	0	9.95173	12.41	0	0	0	0.576106	54.8052	1.82702	7.59242	12.2476	0	0	0	0	0	17.6515	0	0	13.7956	0	0	10.5203	0	1.93537	0	7.82557	0	3.60681	0.644305	0	0	0	0	0	0	0	29.4486	0
WP_017752954.1	MITVVLDGKQIEAEENTTILQVARDNDVYIPTLCYLKDCYNFGKCGICLVEANGRTITACTAKVKEGMIINTKSDTVKERIKKRMSKLLDSHEFKCGPCPRRENCEFLKLVIQTKARASKPFLPKDKSEYIDARSTAIMLDRSKCVLCGRCVAACKTHSGTSVMKFIKKDGKRAVGIENDLCFDKSNCLLCGQCVIACPVAALTEKPHIDRVKKALADPKKHVIVAMAPSIRTAIGELFKMGFGKDVTGKLYTALRMLNFDKIFDINFGADMTIMEEATELLERIKNGGPFPMFTSCCPAWVRQAQNYYPELLKNLSSAKSPQQIFGTATKTYYPAISGIEAKDVYTVTVMPCNDKKYEADLPEMEVNGMRCIDAVITTRELAKMIKDAKIKFTSLEDG…	[FeFe] Group A1	[FeFe] Group A1	Evolving	Labile	1	[FeFe]-centre, 3 x [4Fe4S] clusters, 1 x [2Fe2S] cluster	None	0.210941	0.973507	0.604674	0	1.55125	0	0	1.59151	1.72832	0.913421	0.913509	0	0.644611	0	0.677647	0.62825	0	0	0	0	0	0	0	0	0	0	0	0	0	0	0	0.644305	0	0	0	0	0	0	0	0	0
WP_010234442.1	MSDKHQFTDIRVPIEKDNPSIMRHEELCIKCKLCKKVCTEEISVYGHYDLEKTGDKAICIYCGQCANICPVYSITEVSNVKEVKDAINDPDKIVVFQTSPSVRVSLGEAFGMEPGTYVEDKMVAVLKSLGADYVFDTTFGADLTITEEASELVKRITSGKNPLPQFTSCCPAWVEFVEIYYPELINNLSSSKSPILMQGPTIKTYFAKQAGIDPKKIVNVALTPCTAKKYEITRAEKNDSGKYYNDETMRDMDYVITVRELANWIKESNIDFQAIQGSKYDSLLSRGSGGGIIFGITGGVMESAIRTAYYYVTGENPPKDLYNLEVVGDMDGIREAQVTMGNYTVNIAIVHGTANARKLIEKVKSGEKKYDFVEVMTCRGGCIGGGGQPKVKIPMADKV…	[FeFe] Group A1	[FeFe] Group A1	Evolving	Labile	1	[FeFe]-centre, 2 x [4Fe4S] clusters	None	1.11654	0.761848	0.604674	0	3.10251	0.573215	0	1.59151	0	5.48052	0	0	5.15689	0	0	0	7.66555	3.87876	0	0	0	0.703859	0	2.08095	0.618842	1.35141	3.87074	0.891093	0.978197	0	0.601135	0	1.15221	0	1.34481	0	0	1.97687	0	0	0
WP_008711190.1	METKKYMTIDGLPVEISGEKNILEVIRKAGIKLPTFCYYSELSIYGACRMCMVENKWGGLDAACSTPPKEGMEIWTNTERLRKYRKMILELLLADHCRDCTTCGNNGKCKLQELAMRFNIDGVRFPNGAETPRRDESSLCITRDQNKCILCGDCVRMCNEIQRVGAIDFAGRGSKMTISTVFDIPISESVCVGCGQCAAVCPTGAIVIRNDSAKVWKALDEKETRVSVQIAPAVRVALGKELGIGDGENAMGKIVAALRRMGFNEVFDTSTGADLTVLEESSEFLARLDEGEHEMPLFTSCCPAWVKYAEKNDPDVVSNLSTCRSPMQMFAAVIKEHHKHSPRKQIHVAVMPCTAKKAEAAREEFRTEAGPDVDFVLTTQEIIQMIKESGLVFSELEPE…	[FeFe] Group A3	[FeFe] Group A3	Bifurcating	Labile	3	[FeFe]-centre, 3 x [4Fe4S] clusters, 1 x [2Fe2S] cluster	NADH dehydrogenase, thioredoxin	12.6419	11.4068	9.07011	25.3317	31.0251	31.5268	7.97802	6.36604	2.88053	20.0953	15.5296	32.2678	3.86767	18.0644	11.52	3.14125	0	91.1508	26.4772	3.94835	0.578419	11.2617	9.43407	8.32381	5.26015	6.75704	11.6122	6.23765	8.31467	9.40915	6.61248	1.93292	1.15221	13.6933	17.4825	9.32444	17.6466	20.7571	0	11.6567	1.83573
WP_005836595.1	MEKKQITLQIDRHYITVPEGATILEAARKIGIDIPTLCHIDLKGTCIKNNPASCRICVVEVEGRRNLAPACATRCTEGMVVRTSTLRVMNARKVVAELILSDHPNDCLTCPKCGNCELQTLALRFNIRTMPFNGGELSPRKREVTSSIVRNMDKCIFCRRCESVCNDVQTVGALGAIRRGFNTTIAPAFDKMMTDSECTYCGQCVAVCPVGALTERDHTNRLLEDLANPDKVVIVQTAPAVRAALGEEFGLPPGTLVTGKMVYALRELGFDYVFDTDFAADLTIMEEGAEILNRLTRYLQGDKSVRLPILTSCCPAWVNFFEHHFPDMLDIPSTARSPQQMFGSIAKTFWAKKMGIPREKLVVVSIMPCLAKKYECDREEFKTDGNPDVDYSISTRELA…	[FeFe] Group A3	[FeFe] Group A3	Bifurcating	Labile	2	[FeFe]-centre, 3 x [4Fe4S] clusters, 1 x [2Fe2S] cluster	NADH dehydrogenase	8.95683	64.5278	0	0	0	55.0286	4.29586	0	0	4.5671	0	18.9811	0	6.02146	35.9153	0	0	46.5451	0	0	0	0	0	0	10.5203	57.4348	0	0	17.6075	0	0.200378	5.15444	0	0	0	0	1.21701	27.6762	0.540998	7.97566	0
WP_006930451.1	MARLVVDPITRIEGHLRIEAVVENGVITDAFSSGTMVRGLEIILKGRDPRDAWAFTERVCGVCTTVHALASVRTVEDALNIKVPKNAELIRNLMFCAQMVQDHVIHFYHLHALDWVDVVSALKADPKETSQIAKSISSWPKSSPKYFKEVQDRLKAFVESGQLGIFANGYWGHPAYKLPPAVNLLAVTHYLEMLEWQKELIKIHTIFGGKNPHPNYLVGGVPCSINLNEVNAINMERLNHVKKLIDDAIEIVEKVYLPDLIAIAGFYKDWTKYGGGLKNYLAYGDLPTRSYGEPAHFKFPRGVVLDRNLNEVHEVDPRDQQEIQEYVTHSWYKYSVGDEQSLHPWDGETEFNFTGPKPPFKELNVEGKYSWLKTPRWKGKPMEVGPLARMLVAYASGNK…	[NiFe] Group 1d	[NiFe] Group 1d	Aerobic Uptake	Tolerant	3	[NiFe]-centre, 1 x [4Fe3S] cluster, 1 x [3Fe4S] cluster, 1 x [4Fe4S] cluster	Cytochrome b	0.623093	0.360655	0.604674	0.904703	0	0	0	0	0	0	0	0	0	9.03219	0.677647	0	0	0	1.76515	0	0	0.140772	2.69545	0	0	0	3.87074	0.891093	0	0	1.60303	0	0	0	0	0	0	0	0	0	0
WP_006190671.1	MQTIEDFYREALKKATGREEFEYDPEQLNCLFHPTVHEPVWDEEKLSDEGQKKALTKDARAVLEDVLAGKRAGRKAYILLAPAFLGQYHDVKTGQIRNAFRKMGFDGLVEVALFADILTLKEALEFDRNIQSESDYMLTSCCCPMWVAMIKKSFRHLMPHVPPSVSPMIAAGRTVKKLYPDALTVFLGPCMAKKTEAKDPDLVGAIDHVLTFQECKDIFDRLGIHPQDQSDKKRVYSSEAGRIYAYAGGVSQAVQMTLDRLSPERAIKVRSRHANGVAECKQMLNDLMEGEVKANFFEGMGCAGGCVGGPKKLIPQEEAKEHVKAYGKRSPYRTPLDNPYVLELLTRLGFYTLEGLLYDETFFSRKRFA	[FeFe] Group B	[FeFe] Group B	Evolving	Labile	1	[FeFe]-centre, 2 x [4Fe4S] clusters	None	0.320908	0.141171	0.604674	0	3.10251	0	0	0	0.576106	0.913421	0	1.89811	0	0	0.677647	3.7695	0	0	0	0	0.578419	0	0	0	0.309421	0	0	0	0.489098	0.672082	0.400756	0	1.15221	0	0	0	0	0	0	0	0
WP_004823125.1	MKETYQSIVDIRRKVFAEVARIAYYDVDISELEDSSYRIVPGEVAKYREDIFRERAVADERLRLAMGMDAREISVYKKLTDGFDKVDIDTNAYEKPLINVIKFACEACPTKAHVVTDNCRKCMAHPCTNVCPVNAVSVGRSRAHIDKEKCINCGRCKEACPYNAIVMYERPCAAVCGVDCISSDEYGRAEINHDNCVACGRCIASCPFGAIADKTQIYQLIKAIKSGKRIYAAVAPSFVGQFGANSSPAQIVEGIRQLGFEDVVEVSLGADVTTMNEAKEYIHRVPNDIPFMGTSCCFSWALMVKNKFPELSGQISDSGSPMRYTAEYIHEKDPEGIICFIGPCTSKKLEALDTKVKSHVDFVITFEELMGMFVAKGIEPSEIVIENDVKDASALGRGY…	[FeFe] Group B	[FeFe] Group B	Evolving	Labile	1	[FeFe]-centre, 2 x [4Fe4S] clusters	None	0.790835	3.19315	0	0.904703	0	1.14643	0.613694	6.36604	0.576106	1.82684	1.82702	0	2.57845	0	0	0	0	0	0	0	0.578419	0.84463	0	2.08095	0.309421	0.675704	0.967684	0	0.489098	0	0	0.644305	0	0	0	0	1.21701	2.9653	2.16399	0.613512	0
WP_003148188.1	MPGTMRGVYTNLTEIRRKVFREVSKLAYESGEKPLEEVAHKMEHLPYTIVPGEIATYRESVFLERAVAGERVRMTMGMPMQGVDHPEQLSEGIEKAAIPEVYYQPPLINIIKFACNACEDNVFRVSNACQGCLAHPCREICPKGAISFVDKKAFIDQEKCIKCGMCEKVCPYHAILHHLRPCAEACGMHAIGSDEHGRADIDYEKCVSCGQCLVNCPFGAIADKSQIFQVITAINQGNEVIATVAPSFVGQFGKGGVGKLREAFKQLGFASLEEVATGADMCTVQEAEDFLDEVPEKLPFMGTSCCPSWSAMAKMEFPDNADAISMALTPMVLSARLIRKNHPKAKIVFVGPCSAKKLEAMRRSVKSEVDFVLTFEELAGMMEAKGIAFESLADDKSDF…	[FeFe] Group B	[FeFe] Group B	Evolving	Labile	1	[FeFe]-centre, 2 x [4Fe4S] clusters	None	6.80493	6.39815	2.4187	4.52351	3.10251	2.29286	15.3423	22.2811	6.91327	8.22079	5.48105	3.79621	3.86767	3.01073	4.74353	4.39775	3.83277	1.93938	15.8863	3.94835	5.78419	2.67466	1.34772	6.24286	3.40363	4.72993	1.93537	3.56437	9.78197	11.4254	4.00756	4.51014	16.1309	17.9066	9.41366	5.59466	26.7742	8.89591	8.11497	4.9081	15.6037
WP_014901644.1	MDIQLTINDIALKVPEGTTILEAARTVNIDIPTLCYLKLNEMHYNNNIASCRVCVVEIEGRRNLASSCSTPVSSGMVVRTDSLRAIQARRAMVELLLSDHPKSCLTCAKNQDCDLQSLASELGVRHISYEGDESEFEIDTSSSSIVRDPNKCIRCRRCETMCNDVQTVGVYSAVGRGFETVVKTAFDLPLSKTACTFCGQCIAVCPTGALTELDQVDKVWKALNDPNQFVVVQTAPAVRVALGEGFGLEPGTIVTGKMVAALRRLGFDRVFDTDFAADLTIMEEATELVHRIQHGGRLPLLTSCCPAWVKFFEHQFPDLLDIPSTCKSPHEMLGVLIKSYYAKTLGIDPKTITVVSVMPCVAKKYEAARPELSQGAETADVDIVITTRELARMIREASI…	[FeFe] Group A3	[FeFe] Group A3	Bifurcating	Labile	3	[FeFe]-centre, 3 x [4Fe4S] clusters, 1 x [2Fe2S] cluster	NADH dehydrogenase, thioredoxin	0.649169	0.487207	0	0.904703	1.55125	0	0	0	2.30442	2.74026	0.913509	1.89811	0	0	0.677647	0	0	1.29292	0	0	0	0.422315	0	0	1.5471	1.35141	0	0	0	0	0.400756	1.28861	0	0	0	2.79733	0	0.988435	0	4.29459	1.83573
WP_005884626.1	MKHLSENIRVPIELDNPSIMRNESLCIKCGQCKEVCEKYIGVHNTYKLVDTNNIAVCINCGQCANVCPTSSITEKHEYQDIKKAILDSDKIVIFSTSPSVRVALGEEFGEEDGKFLEGKMISLLRKLGGDYILDTNFAADMTILEEASELIERVSKKTAPLPQFTSCCPSWVKYLETYLPDMRENLSSAKSPIGMQGPTIKTYFAKMKNIDPKKIVNVAVTPCTAKKFEIRREEMNAAGRYLDIPGMRDMDYVITTRELAKWAKEEGIDFSSLEDSKYDSLMGEASGAGVIFGNTGGVMEAALRTAYKYITGEDAPEVLLNFELVRGMKDVKTAIVKVKDLELKVAVIYGTKSAKDFIEKIKRENEEYHFIEVMTCPGGCIGGGGQPKGTLEKGDALRE…	[FeFe] Group A1	[FeFe] Group A1	Evolving	Labile	1	[FeFe]-centre, 2 x [4Fe4S] clusters	None	57.8111	53.8796	66.5141	62.4245	48.0888	48.1501	53.3914	38.1962	63.9477	55.7187	69.4267	60.7394	57.3704	69.2468	55.567	56.5425	45.9933	60.7672	75.9013	47.3802	66.5182	50.3963	49.8658	56.1857	61.8842	72.976	71.6086	56.1389	65.0501	63.1757	68.1286	47.6786	55.3059	90.5865	69.93	70.8657	50.5058	63.2598	34.0829	50.9215	62.4149
WP_026485859.1	MPYTHSVTLNKSRCMGCTNCIKRCPTEAIRVRDGKAFILQEKCIDCGECIRVCPYHAKEAVTDTMDVINGYRYKIALPAPTFYSQYKNYSVDRILGALIAIGFDEVFEVAAAAEIVSFYTARILKSEKVKKPVISSACPVVVRLIQIRFPSLIDNILKLESPMEVAAKVAKKLATKKTGLKEEDIGVFFISPCAAKVTSVKNPLGISKSYVNGVLSMQDVYSHTLDVIDRVEDGRQRFSGDVGVGWAVSGGEAYGTGTENCISVDGVQNCIKALEEIEMGKMNDIDFFEGLACTGGCVGGPLTVENCFIAKNRIKRLSGSKRGSPFLKDLLGYIDQEEIKLDKKIEKKDVMKLDSDLFEALRKMEEIDRIYKELPGLDCGSCGAPNCRALAEDIVMGHA…	[FeFe] Group C	[FeFe] Group C1	Sensory	Labile	2	[FeFe]-centre, 2 x [4Fe4S] clusters, PAS domain	Histidine kinase	2.0795	1.69312	0	5.42822	1.55125	1.14643	0	0	1.15221	1.82684	10.0486	0	0	0	1.35529	0	7.66555	1.29292	1.76515	0	0.578419	3.37852	0	2.08095	2.16595	4.05422	1.93537	8.01984	2.93459	13.4416	2.00378	3.22153	1.15221	0	0	0	3.65102	0.988435	0	1.84054	0.917866
WP_011940950.1	MEPIITLTEKCRKCYSCVRSCPVKAIKVEKNYSEIIFERCIGCGNCLSNCPQHAKVVTDKVGVTEKLLASDQTVIAVLGCSFPAFFHSVSSGQLVAGLKKLGFAEVHEGAAGVELIAGGYAEAIEKSAGSLISSHCPAIVDLIERHYPSLIKNLVGVISPMVAMGRFLKNVLGPDVKVVYLSSCIAAKFEIQAEETTGAIDTVLTYRELEEIFKNRAINPASLKEEPFDGLQPHLGRLFPISEGTFKAFSIATDPLDTEIVTAAGEVNVMGIIRDLASGRINPRIVDVRFCYEGCIGGPGKNSELTEFYKRNLIISHFKNEAPYRTAPHYLEQREPLPLTRSFANKYAKFKVPKGSDVKKVLHATNKFTQKDELNCRACGYRTCREYAVAVFQGLADLE…	[FeFe] Group C	[FeFe] Group C3	Sensory	Labile	1	[FeFe]-centre, 2 x [4Fe4S] clusters, PAS domain	Fusion with transcriptional activator	2.18403	2.08268	0.604674	8.14233	4.65376	0	0	7.95755	2.30442	3.65368	0.913509	1.89811	0.644611	6.02146	2.71059	0	0	1.93938	0	0	0	3.09698	2.69545	2.08095	3.09421	0.675704	0	0	2.44549	0	3.80719	0	0	0	0	3.72977	0	0.988435	0	1.84054	0
WP_029460554.1	MSMLTITIDGKTTSVPAGSTILDAARQLDIDIPTLCYLNLEDLRVNNKAASCRICVVEVEGRRNLAPACATPVTDNMVVKTNTLRVLNARRTVLELMLSDHPKDCLVCAKSGECELQTLAERFGIRESPYDGGEMSHYRKDISASIIRDMDKCIMCRRCETMCNVVQTCGVLSGVNRGFTAVVAPAFEMNLADTVCTNCGQCVAVCPTGALVEHDHSWEVVEALANPDKVVIVQTAPAVRAALGEDLGIAPGTSVTGKMAAALRRLGFAHVFDTDFAADLTIMEEGSEFLDRLGKHLAGDQTVKLPILTSCCPGWVKFFEHQFPDMLDVPSTAKSPQQMFGAIAKTYYADLLGISREKLVVVSVMPCLAKKYERARPEFAVDGNPDVDIVITTRELARL…	[FeFe] Group A3	[FeFe] Group A3	Bifurcating	Labile	4	[FeFe]-centre, 3 x [4Fe4S] clusters, 1 x [2Fe2S] cluster	NADH dehydrogenase, thioredoxin, thioredoxin	0.364206	0.297007	1.20935	0	0	1.71964	0	0	0	0	0	0	1.28922	0	0	0	0	0	0	0	0	0.563087	0	0	0	0	0.967684	0.891093	0	0.672082	0.400756	1.93292	0	0	0	0	0	0.988435	0.540998	0.613512	0.917866
WP_024988140.1	MAFTNNIMIVRHKLLADLVRLWKNDELVEKIDRLPIELSPRKSKPLGRCCIHKERAVWRYKTFPLMGLDMTDEHNEVTPLSEYARLALSRPEPEKENIMCVIDEACSSCVQINYEITNLCRGCVARSCYMNCPKGAIRFKKNGQAMIDHDTCVSCGICHRSCPYHAIVYIPVPCEEACPVKAISKDEHGIEHIDESKCIYCGKCMNACPFGAIFEISQTFDVLQRIRKGEKMVAIVAPSILGQFKTSIGQVYGAFKEIGFTDVIEVAEGAMATTSNEAHELLEKLEEGQPFMTTSCCPSYIELVEKHIPDMKPYVSTTGSPMYYAARIAKEKHPDAKVVFVGPCVAKRKEARRDEAVDYILTFEEIGSILDGLGIELEQVQEFSILHTSVREAHGFAQA…	[FeFe] Group B	[FeFe] Group B	Evolving	Labile	1	[FeFe]-centre, 3 x [4Fe4S] clusters, 1 x [2Fe2S] cluster	None	1.07144	0.761521	1.81402	2.71411	0	0	0	0	0	1.82684	0.913509	1.89811	0.644611	0	0	0	19.1639	0	1.76515	5.92253	1.15684	1.68926	0	0	3.09421	1.35141	0	0	0	0	0	0	0	0	1.34481	0	0	0	0	0	0
WP_022349360.1	MEAIPQIGFVHRGLEKLVQKRDFNQFVYVAERVCGICSFGHGYGYASATEKLMGIEIPRRAEYLRVILEELSRCHSHLLWLGLLADAFGFEALFNHCWRLRETVLDIFQRTCGARIILSITIVGGMAHDISDEDLKWVCEQLEGLKREYREIVDTMFNDVTVRERLCGVGYISFEDALELSMVGPFAKGSGIEHDMRTTGYGAYGDLEHFEPIISTECDCYARCKVRCEEVFQSIDIIEELVKKIPHDGIGGKPKAKVVPEGQSLVMIEQPRGEAFYYVRGNGTKNLDRFRMRTPTSQNLGGLVRALQGVDLADVPMIILTIDPCISCTER	[NiFe] Group 4e	[NiFe] Group 4e	Evolving	Sensitive	6	[NiFe]-centre, 1 x [4Fe4S] clusters	NuoL, NuoH, NuoC, [FeS] protein	0.780756	0.319945	0	0	0	0	0.613694	0	0.576106	0.913421	0	1.89811	0	21.0751	0	0	0	0	0	0	0	0	0	0	0	0	0	0	0.978197	0	0	0	0	0	10.7585	2.79733	0	1.97687	0	0	0
WP_027090514.1	MRGIYSSLTKIRRKVFVEVAKLAYEGNDYSRIEDLPYKIIPGEIATYRDSIFLERAIVGERLRLTMGLSLRPIDKPAPISKGIEDSIIADKYYEPPLINIIKFACNKCAEKKFEVSNGCQACLAHPCMEICPKKAISFKEGKAYIDQDKCIKCGLCKNACPYDAILKKERPCAKACGMNAIESDEYGNAQINYDKCVSCGMCLVSCPFGAIADKSQIFQLIQAIKEGDEIIAAVAPAFIGQFGAKVTPEILKKAMQELGFKDVVEVAIGADLCTIDEAKDFLEKVPDKQPFMATSCCPSWSMMAKKEFPEFKSYISMALTPMVLTARLIKEKHPNSRVVFIGPCAAKKLEASRKSVRSEVDFVLTFEEIGAMFEAKGIDFASLQPNEDDPFTQASSDGR…	[FeFe] Group B	[FeFe] Group B	Evolving	Labile	1	[FeFe]-centre, 2 x [4Fe4S] clusters	None	28.5226	26.2834	16.3262	24.427	15.5125	29.8072	58.9146	44.5623	37.4469	14.6147	23.7512	17.083	53.5027	36.1287	25.0729	6.2825	15.3311	31.6765	26.4772	15.7934	20.2447	15.2033	4.04317	24.9714	11.758	18.9197	16.4506	31.1883	42.0625	37.6366	16.6314	46.39	40.3272	60.0399	32.2754	31.7031	68.7609	22.734	44.3619	8.58917	51.4005
WP_015513462.1	MENITIKINGVEVSAPAGSTILEAARLAHIDIPTLCYLKEINEIGACRMCIVEVKGARSLVASCVYPINPGMEVWTNTPKVIESRKKTLELLLSNHKKECLSCVRSGNCELQQLCKELGVEDENYYSGEMTPAMIDTSAAHMVRDNSKCILCRRCSAVCEKVQGIGVIGPNERGFKSYIGTAFNMDLADTSCVSCGQCIAVCPTGALHEKDNTDEIFEAIADPDKYVVVQTAPSVRAGLGEEFGYPMGTDVEGKMVAALRRLGFDKVFDTDFAADLTIMEEAHEFLDRVQNGGKLPLITSCSPGWIKYCEHYFPDMTENLSSCKSPQQMFGATLKTYYAEKMGIDPKKIVSVSVMPCTAKKFEIGRDDEDAAGVPDVDIAITTRELARMIKKVGIMFTE…	[FeFe] Group A3	[FeFe] Group A3	Bifurcating	Labile	4	[FeFe]-centre, 3 x [4Fe4S] clusters, 1 x [2Fe2S] cluster	NADH dehydrogenase, thioredoxin, thioredoxin	27.0656	24.9621	24.7916	46.1398	20.1663	56.7483	36.2079	19.0981	20.1637	24.6624	32.8863	20.8792	9.66917	18.0644	31.1717	13.1933	19.1639	26.5048	22.9469	19.7418	13.3036	41.1053	26.9545	16.6476	16.3993	29.0553	12.5799	58.8121	38.1497	49.7341	17.2325	25.1279	11.5221	12.64	2.68962	44.7573	27.3827	38.549	22.7219	52.7621	27.536
WP_014903221.1	MSAACHIHTDIDKCQGCNNCIRHCPVHGNIAYLDTSGNVKVKISEENCIECGECLKVCSHSARYYQDDITSFFAELKGGSRVSILTAPAIRVNFPNYKRLFGYLKSLGAHAFYDVSLGADICTWAYLKTINEKNLKTLIAQPCPVVVNYIEKYVPELLEQLSPIHSPMMCTAVYIKQYVKDTSALAMLSPCIAKKTEFESTDNTISYNVTYNNLAKYLEAHNVNLNNYEEVEFNDLDCSLGLLFSRPGGLRENVEARNPDAWVRQVEGPQEACDYLKTYSSRLKQGKSAPLLVDILNCSHGCNIGTGTSLDKSVLDDIDNTLNSLKVVKREERVRNKHFSKMSRLNWLDEYFTKNLRLSDFFRAYDRNRALKPLSNPSESELNSIYIKMHKTTQEAKEL…	[FeFe] Group C	[FeFe] Group C2	Sensory	Labile	1	[FeFe]-centre, 2 x [4Fe4S] clusters, PAS domain	Fusion with methyl-accepting chemotaxis protein	17.5617	17.1554	12.0935	5.42822	12.41	3.43929	7.97802	0	12.0982	3.65368	18.2702	17.083	1.28922	3.01073	14.2306	49.0035	22.9966	25.8584	33.5378	49.3544	46.2735	15.4849	8.08635	27.0524	6.80726	4.05422	19.3537	6.23765	3.91279	31.5879	16.431	6.44305	6.91323	33.7066	41.689	27.0409	7.30204	2.9653	2.16399	6.74863	18.3573
WP_009203940.1	MVNITIDNHTIAVPSGTTIMEAAASIHIPIPKLCYLKDINEIGACRVCVVEIEGQDHLVTSCNNVVEEGMTIYTNSPKVRRNRKHTVEMILSQHDAQCATCVRSGNCTLQTVANDLNIVDSPYKKEICIEEWDTRYPLVRDASKCVKCMRCIQVCDKIQGMHIWDVSGTGARTTIGVSENRDIKTADCALCGQCITHCPTGALRERDDTDKLYRALEDKDTIVVAQIAPAVRAAWGESLGLSREEATVEKIVDALRRIGVDYVFDTTFSADLTIMEEGTEFVERFTNGDLDMYPMFTSCCPGWVRFIKSQYPQMVNRLSSAKSPQEMFGAVMKTAFAKKMNIDPDRIFALSIMPCVAKKDEREKPLFHGEFAGHGVDCVLTTRELDRLIRADHIDPKTL…	[FeFe] Group A2	[FeFe] Group A2	Evolving	Labile	2	[FeFe]-centre, 3 x [4Fe4S] clusters, 1 x [2Fe2S] cluster	NADH-dependent glutamate synthase	115.246	111.119	128.796	48.854	26.3713	63.0536	111.079	74.801	74.8937	69.42	110.535	212.588	3.22306	78.279	63.6988	15.7063	226.134	73.0499	194.166	197.418	206.496	66.585	32.3454	72.8334	89.732	108.788	56.1257	114.951	193.683	215.066	53.501	275.118	21.8919	541.412	181.549	179.962	210.542	106.751	103.872	151.538	136.762
WP_029502583.1	MLQTDNDIGTIKHEVLFEVAKLAFHKELAEKEDVLPFEMIPGPQANFRCCIYKEREIIRQRIRLAQGKSPSLSQDNSNIVQVISSACEECPITRFLVTDNCQKCMGKRCQKACNFQAISMSHDRAHIDPAKCKECGKCAQACPYNAIADLKRPCKKSCPVDAISMDENNIVVIDEEKCINCGQCIKNCPFGAISDRSFMVDVINLLNSEKEVYAMIAPAIEGQFGATASTGVITEALKQLGFTGVYEVALGADLVAASEAEEWAEAYKEGKKKTTSCCPAFVKMIKKHYPSLVDHISSTISPMQATAKYVKAIHKDAITVFIGPCIAKKGEVLDHIAEGGTDYALTFDELYAMLRAKEINLATIGENIQHGSIYAKNFAVAGGVTASVVEALKEKGIDA…	[FeFe] Group B	[FeFe] Group B	Evolving	Labile	1	[FeFe]-centre, 3 x [4Fe4S] clusters, 1 x [2Fe2S] cluster	None	3.36361	3.06279	1.20935	0.904703	4.65376	1.71964	4.29586	4.77453	6.33716	0.913421	0	1.89811	6.44611	12.0429	6.77647	0.62825	0	4.52521	3.53029	0	2.31368	9.57248	9.43407	0	0.309421	4.05422	2.90305	3.56437	2.93459	0	4.20794	3.86583	4.60882	1.05333	4.03442	4.66222	0	0.988435	1.62299	3.06756	3.67147
WP_004065781.1	MRCVQICDKVQSLNIWDIINTGKRTSVGVSKIRKITEADCALCGQCITHCPTGALRERDDVRKVMDAVNNPDKIVVAQIAPAVRASWGEGLGLAQHMATEKRMAAAARALGIDYVFDTNFSADLTIMEEANEFLERFTHRDEYRWPMFTSCCPGWVRFVKSQYPDMVKHLSTAKSPQQMFGAVAKSYFAEKILQTDPENIFCVSIMPCTAKKAEAALPNINDANAGRDVDAVLTTREFDRMLRSELITPANLEEEEFDSPLGTGSGAAVIFGATGGVMEAALRTAYYALHKENPKPDLFQSVRGLDGIKEATFDIAGTTIRTAVVHGLGNTRTLMERIKAKEADYDFVEVMACPGGCADGGGQPIIEGQEPAGERGAKLYALDQNNPLRFSHENPSVIA…	[FeFe] Group A2	[FeFe] Group A2	Evolving	Labile	2	[FeFe]-centre, 3 x [4Fe4S] clusters, 1 x [2Fe2S] cluster	NADH-dependent glutamate synthase	6.34334	5.73596	6.65141	4.52351	21.7175	4.58572	2.45477	0	13.8265	12.7879	8.22158	5.69432	5.8015	6.02146	8.80941	3.14125	11.4983	8.40397	3.53029	0	0	12.2471	13.4772	2.08095	27.8479	8.78415	4.83842	1.78219	9.29287	2.68833	6.01135	3.86583	2.30441	1.58	1.34481	5.59466	1.21701	18.7803	2.16399	17.7919	1.83573
WP_006524080.1	MQTGRVIIDGQAVEIAGAKNLLELVRRTGVELPTFCYHSELSVYGACRLCMVEVEKMGLVASCSTPPSEGMVIYTNTMRTKRLRKVILELLLANHDRECPTCVKSTTCKLQKLAKQYGVNKIRFGSRDVKLPIDDSSSSIVKDPNKCILCGDCVRMCKEIQGLGIWDFAFRGSKTQVTTAFGKELSEVDCINCGQCITVCPTGALTAKSEVEQAWKAILDPSKTVVFQIAPAVRVALGEEFGLSAGSAVTGKVVAALKKLGADKVFDTLFAADLTTIEESMEFISRLEKGDKLPLFTSCCPAWVKYCEQAHADLLANISSCRSPQQMFGSLVKKHYAQVIGKEPGEVVCVSVMPCTAKKFEATRPEFTTGGVRDVDIVLTTVELAQMIKEAGIVFNELE…	[FeFe] Group A3	[FeFe] Group A3	Bifurcating	Labile	3	[FeFe]-centre, 3 x [4Fe4S] clusters, 2 x [2Fe2S] cluster	NADH dehydrogenase, thioredoxin	0.655506	0.463511	0.604674	0	0	0.573215	0.613694	0	0	0.913421	0.913509	0	0.644611	0	3.38823	3.7695	0	0	0	0	0	0.703859	1.34772	0	0.309421	0.675704	0	0	1.4673	0	0.801513	1.28861	1.15221	0.526666	5.37923	0.932444	1.82551	0.988435	0	1.22702	0
WP_005028008.1	MSQTSSFSLPIGPVHVALEEPVYFHLDVDGETVRKVEITSGHVHRGMEGMATQRNFFKNTTLTERVCSLCSNSHSLTYCMAVENVLGMTPPPRAQYLRVLAEETKRVASHLFNIAIFAHNVGFKSLFLHIMEVRENMQDVKETIYGNRMNLSANCIGGVKFDMDDSLTMYMLERLDTVEEAVKRVEKVFRTDPLIAKRSRGVGVLSREDAWALGVVGPVARGSGLDIDVRKNTPYLVYPDLYFDIVKEQDGDVWSRAMVRVREVFESIRLLRQCLDKLPDGPLAVHMERIPESESVARSEAPRGELIYYLQTNGTDTPARLKWRVPSYMNWEALTVMMKDCQLADIPVIVNSIDPCVSCTER	[NiFe] Group 4c	[NiFe] Group 4c	Evolving	Sensitive	7	[NiFe]-centre, 1 x [4Fe4S] clusters	NuoL, NuoH, NuoC, [FeS] protein, polyferredoxin	0.470988	0.243045	0	0	0	0	0	0	2.30442	0	0	0	2.57845	0	0	0	0	0	7.06058	0	0	0.140772	0	2.08095	0	0.675704	0	0	0	0	0.400756	0	0	0	0	0	0	0.988435	0	0.613512	0
WP_013251691.1	MVRLTIDGREVEVEEHTTILDAARTAGVNIPTLCYLRDINEIGSCRVCAVEVEGIDQLVASCNNYVLDGMVVRTNSPKARAARKVNVELLLSRHKTACTSCVRSGNCTLQELANDLNIYYLDYAEHVPFVHWDKTYPLIRENHKCIDCMRCVQVCDKVQASRIWDATSRSTHRTVNVVGGRSFDDVDCTYCGQCITHCPTGALRERDDTERVFRALADPNVTTIVQVAPSVRTSWGDEFGLGADEGSLGRLVSALRPMGFDYIVNTDFSADLTIMEEGTELLAHMAREGDKDAAERLPMFTSCCPGWVRFVKAHYPQLVDHVSTSKSPQQMFGAVVKSYYADLLGLDPHGIFSVSIMPCVAKKAEADIECMNDACGDPDVDAVLTVREVTRMIRAEHVC…	[FeFe] Group A2	[FeFe] Group A2	Evolving	Labile	2	[FeFe]-centre, 3 x [4Fe4S] clusters, 1 x [2Fe2S] cluster	NADH-dependent glutamate synthase	2.72681	2.3236	2.4187	0.904703	6.20501	0.573215	1.84108	1.59151	3.45663	6.39394	3.65404	5.69432	3.22306	3.01073	5.42117	0	0	4.52521	0	0	0	3.51929	9.43407	2.08095	4.33189	8.10845	1.93537	0	2.44549	0.672082	2.8053	1.28861	0	0	2.68962	0.932444	0	3.95374	0	8.58917	1.83573
WP_025075971.1	MAFTNNIMIVRHKLLADLVRLWKTDQLVEKIDRLPIELSPRKSKPMGRCCVHKERAVWKYKTFPLMGFDMTDEHDELTPLSDYAKIALNRPEPVKENIMCVIDEACSSCVQINYEISNLCRGCVARSCYINCPKDAIRFKKNGQAMIDHDTCISCGICHKSCPYHAIVYIPVPCEEACPVKAISKDEHGIEHIDESKCIYCGKCMNACPFGAIFEISQTFDVLQRIRKGEKMVAIIAPSILGQFHTSIDRVYGAFKEIGFTDIIEVAEGAMMTTSNEAHELLEKLEEGQPFMTTSCCPSYIELVEKHLPGIKPYVSSTGSPMYYAARIAKEKYPDAKIVFVGPCVAKRKEVRRDEAVDFILTFEEVGSILDGLDIQLEEVQTFSVVQTSVREAHGFAQA…	[FeFe] Group B	[FeFe] Group B	Evolving	Labile	1	[FeFe]-centre, 3 x [4Fe4S] clusters, 1 x [2Fe2S] cluster	None	1.66388	2.43755	0	2.71411	3.10251	0	0	1.59151	1.15221	8.22079	0	0	1.93383	0	0	0	3.83277	0	1.76515	0	0	2.11158	0	0	0.618842	1.35141	2.90305	0	0.489098	0	5.61059	0	0	0.526666	0	0	0	0	0	4.29459	0
WP_012798774.1	MVKLTIDGKTIEVKDNATILGACKQAGADIPTLCWMKGLNDIGSCRVCVVDCDGELVPSCNTNVREGMVIKTGTPRVVAARKANIETLMESHRGECSSCVRQETCALRALASDFNVGESAYCLPEKGIWDEDFPLIRDASKCIKCMRCVAECSKVQYCSVWEHSGPGPHMNVFVKDGLAIDAAGCALCGQCITHCPTGALTARDDTGKVMKALLDPEVITVVQVAPAVRAAWGEGVGLTREQATPKRMASALRALGFDKVFDTDFAADLTIMEEGSEFVEFLSSDKPRPMFTSCCPGWVRFVKLHYPQFVPQLSSAKSPHQMEGAVVKNTMKAQAEEEGKRLFVVSVMPCVAKKYECDVPQLSTEAGRDVDAVLTVREFDRMLHMFRVDCAALEETDFD…	[FeFe] Group A2	[FeFe] Group A2	Evolving	Labile	2	[FeFe]-centre, 3 x [4Fe4S] clusters, 1 x [2Fe2S] cluster	NADH-dependent glutamate synthase	1.22718	1.08436	0.604674	0.904703	0	0	4.90955	0	2.88053	0.913421	1.82702	0	1.28922	0	0	0	0	0	0	0	1.15684	0.281543	2.69545	0	0.618842	6.75704	0.967684	0	3.91279	0	0.400756	0	10.3699	0.526666	0	1.86489	0	2.9653	5.95098	1.84054	0.917866
WP_006003971.1	MAKATIAIDPVTRIEGHLKAQVVVENGKVVDAHLTGGMFRGFEQILKGRDPRDSTQIVQRICGVCPTSHAMASALAQEDAFNIKVTGNGRITRNLILGANYLQSHILHFYHLAALDFVAGPDTAPFVPRFAQPDLRLPPEANKVGVDQYLEALEVRRIAHEMVALFGGRMPHVQGIVPGGATEMPTKEALLEYAARFKKVRQFIVEKYLPITYIVGSVYKDLFEQGQGVHGCSCFGVFPMTDDGKTHLLKAGVFLNGRDVEFDPKKITEDLKYAWYDDATTGKGADGAETNPNLDKKDAYSFVKAPRYDGEVIEVGPAARMWVANAPLSEVGVKMLKEKFGIEARTIRDLGWDKVFSIMGRHVARAEEALLIANAVEGWLKEVKPDGETFTPFEIPQSA…	[NiFe] Group 1a	[NiFe] Group 1a	Anaerobic Uptake	Sensitive	3	[NiFe]-centre, 3 x [4Fe4S] clusters	Cytochrome	1.22554	0.89283	0	0	23.2688	0	0	0	0	0	0	0	0	0	0	0	0	0	0	0	0	26.3243	0	0	0	0	0	0	0.978197	2.68833	0	0	0	0	0	0	0	0	0	0	0
WP_013757426.1	MSTSVKPVIRVDKSKCVNCHRCITVCPAKMCNDGSGNYVGVNTDLCIGCGECIEACSHGARVGLDDADDFFRAVKNGEPVVAVVSPAVAASFNGEYLRLNGWLKSVGVKAVFDVSFGAELAVQSYAEYMRRQDPKLVIAQTCPVLVSFIEIYRPELIPYLAPVDSPVLHTMKWIRQFKPEYASAKIAAITPCYAARLEFDETGTGDFNVTIKSLESYIESHGIDLSSFPETEFETPPAERAVTFSTPGGLTRTAERVMPGISGITRRIEGQPQIFTYLAHLSKAIKSGDAPVFKLVDCLNCEMGCNAGPATSNSTCNRDKVEGYIERRAVKAALKAGKRRKPITSAKMNKSLEKYRKPGLYDRTYVDRSDKFAESFHIPTDAELKNMYRAMRKETKNDM…	[FeFe] Group C	[FeFe] Group C2	Sensory	Labile	1	[FeFe]-centre, 2 x [4Fe4S] clusters, PAS domain	Fusion with methyl-accepting chemotaxis protein	3.22162	2.96804	0.604674	0.904703	0	1.14643	0.613694	1.59151	5.18495	0.913421	1.82702	1.89811	0	3.01073	5.42117	5.65425	0	3.2323	10.5909	11.8451	1.73526	6.89781	1.34772	8.32381	3.09421	0	3.87074	0	0	6.04874	3.80719	0.644305	1.15221	3.68666	4.03442	21.4462	0	1.97687	0	0.613512	2.7536
WP_013787823.1	MDKVRITIDGIPVEVPANYTVLQAAKYANIDIPTLCYLKEINEIGACRLCVVEIKGVRNLQTSCVYPVSDGMEIYTNTPRVREARKSNLELILSAHDRSCLTCVRSGNCELQDLSRKFGIDEIRFMGENIKYQKDESSPSIVRDPNKCVLCRRCVATCNNVQNVFAIGMVNRGFKTIVAPSFGRGLNESPCISCGQCIEACPVGAIYEKDHTKMVYDALLDEKKYVVAQTAPAVRVALGEEFGMPYGSIVTGKMVSALKRLGFDKVFDTDFAADLTIIEEGNELLKRLNEGGKLPMITSCSPGWINYCERYYPEFIDNLSTCKSPHMMMGAIIKSYFAEKEGIDPKDIFVVSIMPCTAKKGEIDRPQMIVDGMKDVDAVLTTRELARMIKQSGIDFVSL…	[FeFe] Group A3	[FeFe] Group A3	Bifurcating	Labile	4	[FeFe]-centre, 3 x [4Fe4S] clusters, 1 x [2Fe2S] cluster	NADH dehydrogenase, thioredoxin, thioredoxin	0.328711	0.171825	0	0	0	0.573215	0.613694	0	0.576106	0	0.913509	1.89811	0.644611	0	1.35529	0.62825	0	0	0	0	0	0	1.34772	2.08095	0.928262	0	0	0	0.489098	0	0	0	0	0	0	0	0	0	0	1.22702	0.917866
WP_012003383.1	MASVLVEINGKQHQVPSGATILEACNLAGVYIPTLCNHPRLEPTGACRVCVIEVEGARNLQPACATKVQDGMKIKTKTDRVEKAVKFNLALLLSRHPKDCMTCEVNGRCEFQDLIYRYDIQDLFPSEEKTSTVYDDSSPSIIRDLEKCVVCGRCVRACSELQGMDIYSMVDRGFETLPQTAFEMPVYETDCIACGQCSAFCPVGAITENSNVRKVLEELERHDKVLVVQTAPATRVALGEEFGLEPGSISTGKMVAALRKLGFDYVFDTNFAADLTIMEEGSEFLERLKNGGPFPMFTSCCPAWVNMAEKLYPQFLKNLSSAKSPHQMLGPLVKTYFAKKKGIDPENILVVSIMPCTAKKDDIIRPQHMVNGMPGVDIVLTTRELGKLIKMKKIPYASL…	[FeFe] Group A1	[FeFe] Group A1	Evolving	Labile	1	[FeFe]-centre, 3 x [4Fe4S] clusters, 1 x [2Fe2S] cluster	None	0.793114	0.528407	0	2.71411	1.55125	0.573215	0.613694	0	0.576106	0.913421	0	1.89811	0.644611	3.01073	0	0	0	0.646459	0	0	0	1.40772	6.73862	2.08095	1.23768	3.37852	0	0	1.4673	0	1.40265	1.28861	0	0.526666	0	0.932444	0	0	0	1.22702	0
WP_014254579.1	MFWKGVHKTMEMVNITIDNRKIQVPKDYTILEAAKAANIYIPTLCFLKDINEIGACRMCVVEVKGARSLQAACVYPVSEGLEIYTQSPAVREARKVTLELILSNHEKKCLTCVRSKNCELQTLAEELNVKDIRFEGETYKLPLDDFSPSVVRDPNKCILCRRCVSMCKNVQQVSVIDTTERGFKTIISSAFNKSLNEVPCTMCGQCINVCPVGALREKDDTDKVWEALANPELHVIVQTAPAVRVALGEEFGMPIGSRVTGNMIAALKLLGFDRVFDTDTAADLTIMEEGTEVINRIKNGGKLPVITSCSPGWIKFCEHYYPEFLDNLSTCKSPHEMFGAILKSYYAEKEGIDPSKVFVVSIMPCTAKKFEAARPELAANGYPDVDVVLTTRELARMIK…	[FeFe] Group A3	[FeFe] Group A3	Bifurcating	Labile	4	[FeFe]-centre, 3 x [4Fe4S] clusters, 1 x [2Fe2S] cluster	NADH dehydrogenase, thioredoxin, thioredoxin	2.84454	2.49879	2.4187	4.52351	4.65376	4.0125	5.52324	4.77453	8.06548	1.82684	2.74053	0	0.644611	0	6.77647	0	0	2.58584	3.53029	0	1.15684	2.67466	5.3909	0	1.85652	5.40563	4.83842	7.12874	6.35828	5.37666	2.00378	3.22153	1.15221	1.58	0	2.79733	0.608504	4.94217	2.16399	7.97566	0.917866
WP_012862886.1	MDEIKDADQIKNEVLQKTAEYAFKNILAEKAEDIPFEIISGIKPQFRCCVYREREIIRQRVRLSMGQLPRDAVYTELEPTQVVHVIPCACEGCPIVRFTVTDNCQNCLTKKCIKSCAFGAISATKKGAYIDKQLCKKCGKCVASCPYHAIVDIERPCKKSCPVDAIEIDENDIAIIDSTKCINCGLCINNCPFGAISDVSMMTNVINTLLTNDNVYAMIAPAIEGQFGPDASIGVIKNWIKKLGFKDVYEVALGADAVAYREAEELSENFKNGKKMTSSCCPSFVNLISKYYGNLVENISTTISPMVATARLIREKDPEAVTVFIGPCVTKKNEALSLYIKEVNYVITFEELAAMFAGKNIDLSAGECDENSATSYGKGFAKSGGVAAAVLKVLEEKGI…	[FeFe] Group B	[FeFe] Group B	Evolving	Labile	1	[FeFe]-centre, 3 x [4Fe4S] clusters, 1 x [2Fe2S] cluster	None	1.51556	0.756453	0.604674	0	1.55125	0.573215	0.613694	4.77453	0.576106	0	6.39456	0	0.644611	3.01073	0	0	0	0	5.29544	0	0	0.140772	0	0	2.78479	2.02711	0	1.78219	0.489098	0	0	0	0	0	0	0	0	0	0	0.613512	0
WP_002846126.1	MVNLIIDNVEVEVKEGTSIMDAAKFAGVDIPRLCFLKDLNEIGACRICIVELEGTNKLITSCNNKVEDGMVIRTNSPRVRKARRTNIEFILANHDFKCATCVRSGNCSLQDMANSMSIFNMPFEVKYEKKAWNKDFPLQKSFEKCIKCMRCIQVCNKVQSLGIWDVVNSGYRTSVDVSWNRTIEQTDCSLCGQCITHCPVGALTVRNDIDKVYRAMEDPSIVTVVQVAPAVRTAWAERLNIDEKDASTNLMVAALKKIGFDYVFDTNFSADLTIMEEATEFLNKFTAGPMEFPMFTSCCPGWVRFIKSQYPDLVKYLSTAKSPQQMFGTIAKTYYAKLLNINPKKIFCVSIMPCTAKKHEADIPSINDSEAPKDVDVVITTRGLEKMIRSENIKFDMLE…	[FeFe] Group A2	[FeFe] Group A2	Evolving	Labile	2	[FeFe]-centre, 3 x [4Fe4S] clusters, 1 x [2Fe2S] cluster	NADH-dependent glutamate synthase	1.32376	1.13173	1.20935	0.904703	1.55125	0.573215	0	14.3236	1.15221	0.913421	0	1.89811	2.57845	3.01073	2.03294	2.513	0	0.646459	0	0	0	0.84463	1.34772	0	1.5471	0.675704	0.967684	0	0.489098	0.672082	0.400756	1.28861	1.15221	2.10666	1.34481	0	0	1.97687	0	2.45405	3.67147
WP_027626440.1	MEEKALIITDEKTCVGCNQCIRYCPIFDANTAYIKDGENKVKINPDKCIHCGKCIEVCEHNCRDYIDDTEKFFNDLKNGKKISVLAAPAIRVNSANYKKLFGYLKSLGVKFFYDVSFGADITVWAYLKYIKENNINSIIAQPCPAIVNYIEKNNLDLLNSLCKVQSPLLCSAIYIKKYLKEDSSLAFLSPCIAKKDEIMNETSHGFVNYNVTFKKLLAYIINNNIDLSKYEEVNFNSDNGLGFLFSRPGGLKENIQAYDENLWVRQIEGQEVVYDYLDEYGERVKKNLQVPNVIDALNCEFGCNIGTGSIKERVFIDDIDVKFNNIKKEKNKKEISKIHKKFDKELNLKDFLRDYKVKSKEKVKEPSNAKYEEIFKDMLKYTQNSRSIDCAACGYVNCN…	[FeFe] Group C	[FeFe] Group C2	Sensory	Labile	1	[FeFe]-centre, 2 x [4Fe4S] clusters, PAS domain	Fusion with methyl-accepting chemotaxis protein	130.577	132.743	85.259	62.4245	82.2164	28.0875	65.0515	50.9283	100.242	20.0953	105.967	161.339	18.6937	66.236	140.273	358.731	114.983	133.817	250.651	292.178	296.15	136.126	55.2567	243.472	54.7675	62.1648	171.28	29.4061	26.9004	200.28	127.441	68.9407	49.5448	180.646	272.996	233.111	65.7184	36.5721	29.2139	25.7675	113.815
WP_009202817.1	MRGIQTPVRNVRRRIFKEIAKFGYEQRNLQDLEDLPYEIIPGEVAKYRDSIYRERAIVGERLRLAMGMSLNPADKPTRITKEIDESNISEKYYEPPLLQVIPSACNECKEKAFIVGEQCQGCMAHPCMEVCPKKAISFKDGYSYIDQEKCIKCGQCKKVCPYGAIYERKRPCANACGVGAIETDYAGRAKINPDKCVSCGMCMVNCPFGAIADKSQIYQLIKAMNEGAEVIAILAPAFVGQFGPKATPNKIKAALFDIGFADVWEVAVGADAGALEEAKHYVQSVATGKLPFLLTSCCPSWSMLGKKYFPEVIDEISNALTPMVATARAARITSPNAKIVFVGPCVAKKLEASRRTVRSEVDFVITFEELAGMFDAKEIDFNTYEKEEELNDAFGAGRG…	[FeFe] Group B	[FeFe] Group B	Evolving	Labile	1	[FeFe]-centre, 2 x [4Fe4S] clusters	None	78.3959	76.7231	92.5151	36.1881	9.30752	47.5768	79.7802	63.6604	46.0884	45.671	60.2916	142.358	16.7599	66.236	49.4682	11.3085	103.485	53.6561	141.212	148.063	143.448	46.3139	8.08635	43.7	62.8124	71.6246	52.2549	80.1984	98.7979	141.809	46.8885	198.446	23.0441	325.479	118.343	116.555	121.701	75.121	57.3458	102.457	118.405
WP_028856758.1	MELINVIIDGKSIEVPKGATILSAAESLGISIPTLCHLQIGGNGYKNDCASCRICVVEVEGRRNLAPSCATPVHEGMVVKTNTMNVMQKRRTIMELLLSDHPKDCLACSKNGECELQDLAIQLGVREVRFEGEMSTYRSDYSPSIIRDMDKCIMCRRCETMCNDVQTVGALSGVNRGFDSVVAPAFEQNLEDSVCTYCGQCVAVCPVGALHENDHTWKLVKDLADPKKKVIVQVAPAVRVALGEEFGEEPGVNVEGRMVTGLRQLGFDQVFDTNWAADLTIMEEASEFKDRLERFLAGDKDVKLPLLTSCCPAWVKFFEHNYPDMLDVPSSAKSPQQMFGAIAKGIWAKEEGIAREDLIVVSVMPCLAKKYETSRDEFKVDGNPDVDYSISTRELAKLL…	[FeFe] Group A3	[FeFe] Group A3	Bifurcating	Labile	3	[FeFe]-centre, 3 x [4Fe4S] clusters, 1 x [2Fe2S] cluster	NADH dehydrogenase, thioredoxin	0.432942	0.168681	0	0	0	0.573215	0.613694	3.18302	0	0.913421	0	0	0	9.03219	0	1.2565	0	0	0	0	1.15684	0	0	0	0	1.35141	0	0	0	0	0	0	0	0	1.34481	0	0	0.988435	0	0.613512	0
WP_006874974.1	MTRDKTGRSCKMRGIYTSVTDIRRKVFTEVARLAYEGGDYSRIEGLPYKIVHGETAQYRDSIFLERAIVGERLRLAIGLPLRPMDEHAPVSMGINQSAVAEKYYDPPLVNIIKFACNACPEKQYRVTDCCQGCLAHPCKEVCPRDAVSIVHGKSVIDQEKCIKCGRCAEVCPYGAILKLERPCASACGMDAISSDEHGRAVIDYDKCVSCGMCIVNCPFGAISDKGQIFQVIQSIKKGDRVIAIVAPAFVGQFGPAMTPEKFTAAMKQLGFDSVVEVAIGADLCTIEEAKDFMRAVPEEQPFMATSCCPSWSVMAKKLFPTLAPYISMALTPMVLTARLQKKEHKGCKIVFVGPCSAKKLEASRRTIRSDVDFVLTFEELMGMFVAKGVKFGDIKEEKP…	[FeFe] Group B	[FeFe] Group B	Evolving	Labile	1	[FeFe]-centre, 2 x [4Fe4S] clusters	None	49.9305	48.2942	42.3272	94.9938	77.5626	140.438	55.8461	49.3368	28.8053	37.4502	52.07	53.147	38.0321	45.1609	65.0541	3.14125	26.8294	206.867	121.795	15.7934	17.3526	35.6152	18.8681	18.7286	43.9378	55.4077	67.7379	63.2676	54.2899	11.4254	25.6484	36.0811	9.21764	37.3933	65.8956	36.3653	81.5395	59.3061	20.0169	79.1431	3.67147
WP_025912384.1	MSEEKKGQQYLAALHQAFPGVVLEESWQTKDQITVTIKVNYLPEVVEFLYYQQGGWLSVLFGNDERQLCGSYAVYYVMSMEQGEKCWITVRVEVDPNKPEYPSVTPRVPAAVWGEREVRDMYGLVPVGLPDERRLVLPDDWPDELYPLRKDSMDYRQRPAPTTDSETYEFINELGSKKNNVVPIGPLHVTSDEPGHFRLFVDGENIIDADYRLFYVHRGMEKLAETRMGYNEVTFLSDRVCGICGFAHSTAYTTSVENGMGIVVPERAQMIRAILLEVERLHSHLLNLGLACHFVGFDSGFMQFFRVREASMKMAEILTGARKTYGLNLIGGIRRDLLKNDMIQTRQLAQQMRRDVQELVDMLLSTPNIEQRTVGIGRLDPEIARDFSNVGPMVRASGH…	[NiFe] Group 4a	[NiFe] Group 4a	Evolving	Sensitive	6 or 9	[NiFe]-centre, 1 x [4Fe4S] clusters	NuoL, NuoH, two [FeS] proteins, (three antiporter subunits)	0	1.27523	0	0	0	0	0	0	0	0	0	0	0	0	0	0	0	0	0	0	0	0	0	0	0	0	0	0	0	0	0	0	0	0	0	0	0	0	0	0	0
WP_025151932.1	MSYQNYTDTLQGVRKGAGYLAQVREKFPHAVLEEEWQTANQLTITIKTEMLPEVVEFLYYGCGGWLPVLWGNDERPLNGQFAVYYALSMEEGEKCWVTVKAYVSPVTQEFPSVTPRVPAAVWGEREIRDMYGLRPVGLPDERRLVLPDDWPDDLYPLRKDTMDYRQRPAPTTDTETYEFINDSKKDARVVPIGPLHITSDEPGHFRLFVDGERIVDADYRMFYVHRGMEKLAETRMGYNEVTFLSDRVCGICGFTHSVAYTTSVENALGIYVPQRAHTIRSVLLEVERLHSHLLNIGLASHFTGFDTGFMQFFRVREKSMTMAELLTGARKTYGTNLIGGVRRDFLKEQRVKTIQLVREMRADVTQLVDMLLSTPNMEQRTVGVGRLDPKVARDYSPVG…	[NiFe] Group 4a	[NiFe] Group 4a	Evolving	Sensitive	6 or 9	[NiFe]-centre, 1 x [4Fe4S] clusters	NuoL, NuoH, two [FeS] proteins, (three antiporter subunits)	0	3.5069	0	0	0	0	0	0	0	0	0	0	0	0	0	0	0	0	0	0	0	0	0	0	0	0	0	0	0	0	0	0	0	0	0	0	0	0	0	0	0
WP_028726954.1	MAFTNNVMIVRHGLMAKLVRLWKENRLLDEIDRLPIELSPRKSKVIGRCCVHKERAVWKYKTLPLLGFDMQDEIDELTPLSEYAKRALLRPENKKENLMCVVDEACSSCVQVNYEITNLCRGCVARSCYMNCPKDAIQFKKNGQARIDHDTCISCGKCHQNCPYHAIVYIPIPCEEVCPVKAISKDEYGVEHIDESKCIYCGKCINACPFGAIFEISQVFDILQRLRNKEQMIAIVAPSILAQFSAPVEKVYGAIKAMGFEEIVEVAQGAMETTRREAEELKEKLEEGQPFMTTSCCPSYVQLAEKHIPDLKKYISSTGSPMYYTARLVKEKYPDCKVVFIGPCVAKRKEVKMDPAVDFTLTFEEIGSILEGLDIKVEEAKPFSILYNSVREAHGFAQS…	[FeFe] Group B	[FeFe] Group B	Evolving	Labile	1	[FeFe]-centre, 3 x [4Fe4S] clusters, 1 x [2Fe2S] cluster	None	8.93576	38.5918	6.65141	17.1894	9.30752	2.86607	0.613694	1.59151	1.72832	44.7576	4.56754	18.9811	7.73534	9.03219	5.42117	0.62825	19.1639	0	1.76515	0	0	15.3441	4.04317	2.08095	46.7225	6.08133	0.967684	0	5.86918	0	34.0643	0.644305	0	0	1.34481	0	0	7.90748	0	0.613512	0.917866
WP_028255372.1	MSFESRFQHIDRRVPIAEDNIAIIHDLDKCKNCTLCRRACADVMSVLDYYDLESTGDNPICIHCGQCAAACPFGAMYERTELDEVKAAIADPNKIVVIQTAPAVRVGIGEEFGYEPGTYLEGKMVGALRALGADYVVDTNFGADLTIMEEASELIERVLHGHGKLPQFTSCCPAWVKFCETYFPEYTSHISTTRSCIAMEAAALKTYFAKNMNIDPANIVSVSVAPCTAKKFEIRRPEQNKSAEYWGRDDLRDTDYCLTTREFAQWLRDENVDFTAVEDSEFDKYIGAASGGGVIFGNTGGVMEAAMRTAYKFITGKEPSPEPLTKLEAVRGMDGVKEAEVAIGDKTLKVAVVHGGKNIRDFLNEMKANGKEYDFVEMMACRGGCIGGGGQPRVKMPVA…	[FeFe] Group A1	[FeFe] Group A1	Evolving	Labile	1	[FeFe]-centre, 2 x [4Fe4S] clusters	None	0.301864	0.150928	0	0.904703	0	0.573215	0	0	0	2.74026	0	1.89811	1.28922	0	0	0.62825	0	0	0	0	0	0.281543	0	0	0.928262	0	0	0.891093	0	0.672082	0	0	0	0	0	0.932444	0	0	0	0	0
WP_003512584.1	MQMVNVTIDNCKIQVPANYTVLEAAKQANIDIPTLCFLKDINEVGACRMCVVEVKGARSLQAACVYPVSEGLEVYTQTPAVREARKVTLELILSNHEKKCLTCVRSENCELQRLAKDLNVKDIRFEGEMSNLPIDDLSPSVVRDPNKCVLCRRCVSMCKNVQTVGAIDVTERGFRTTVSTAFNKPLSEVPCVNCGQCINVCPVGALREKDDIDKVWEALANPELHVVVQTAPAVRVALGEEFGMPIGSRVTGKMVAALSRLGFKKVFDTDTAADLTIMEEGTELINRIKNGGKLPLITSCSPGWIKFCEHNYPEFLDNLSSCKSPHEMFGAVLKSYYAQKNGIDPSKVFVVSIMPCTAKKFEAQRPELSSTGYPDVDVVLTTRELARMIKEAGIDFNSL…	[FeFe] Group A3	[FeFe] Group A3	Bifurcating	Labile	4	[FeFe]-centre, 3 x [4Fe4S] clusters, 1 x [2Fe2S] cluster	NADH dehydrogenase, thioredoxin, thioredoxin	3.68437	3.27132	8.46543	2.71411	6.20501	9.17144	7.36432	7.95755	13.2504	7.30737	2.74053	0	0.644611	0	3.38823	0	3.83277	0.646459	3.53029	0	4.04893	4.78624	8.08635	0	4.64131	3.37852	0	5.34656	7.82557	1.34416	1.8034	7.08736	2.30441	0.526666	2.68962	0	1.21701	3.95374	3.78699	6.13512	3.67147
WP_026892188.1	MENITIKINGLDVSAPAGSTILEAARLAHIEIPTLCFLKEINEIAACRICTVEIGGGKLAASCVYPINAGMEVWTNTPKIRDYRKKTLQLILSNHDRSCLSCVRSGDCELQTLCKELGVDSENYFDGDKTPSTPDESAAHMVRDNSKCILCRRCSSICEKVQGIGVIGPNSRGFATFIGSPFEMGLGDTSCVSCGQCISVCPTGALYEKSSIQEVAAAIADPEKHVIVQTAPAVRAALGEEFNFPIGTNVEGKMVSVLRRLGFDKVFDTNFSADLTIMEEAHEFIERVQHGGVLPMITSCSPGWIKYCEHYFPDMTENLSSCKSPQQMFGAIAKSYYADKMGLKPEDIVSISVMPCTAKKFEIGRDDQDANGSPDVDYTITTRELARMIKQAGLRFETL…	[FeFe] Group A3	[FeFe] Group A3	Bifurcating	Labile	4	[FeFe]-centre, 3 x [4Fe4S] clusters, 1 x [2Fe2S] cluster	NADH dehydrogenase, thioredoxin, thioredoxin	3.72795	4.36366	9.07011	3.61881	0	13.1839	3.68216	1.59151	0.576106	6.39394	0.913509	0	2.57845	3.01073	0	0	0	5.17167	1.76515	0	0	0.84463	0	0	2.16595	0.675704	0.967684	16.9308	0.978197	4.70457	0.400756	7.08736	0	12.1133	1.34481	2.79733	7.91055	0	0	9.8162	0
WP_018085930.1	MSTGKVIIDGREMPIDGAKNILELVRRAGIELPTFCYHSELSVYGACRLCLVEVERMGLVASCSTPPADGMVIHTNTERTRRLRRMVIELLLANHDRECTTCEKSGRCKLQELAHKFGVKKVRFGNRDQKLPLDESSPSIVKDPNKCILCGDCVRMCKEVQGIGVWDFAHRGSKTVVTTAFDKPVSEVACVNCGQCVAVCPTGALTVKSEIDKVWAYLHDPSKVVVVQVAPAVRVAIGEEFGVKTHDMATGKMVTALRKLGFDKVFDTLFTADLTTIEESLEFLDRLQNGGKLPLFTSCCPGWIKYAEQFHADLLDNLSSCRSPQQMFGSLVKKHYAKSIGRAPQDVICVSIMPCTAKKFEAKRPEFMTGGVYDVDVVLTTVELARMIKEAGIVFEELE…	[FeFe] Group A3	[FeFe] Group A3	Bifurcating	Labile	3	[FeFe]-centre, 3 x [4Fe4S] clusters, 2 x [2Fe2S] cluster	NADH dehydrogenase, thioredoxin	0.558712	0.46619	1.20935	0.904703	1.55125	1.14643	0.613694	0	2.30442	0	0	0	1.93383	0	0	0	0	0	0	0	0	0.985402	0	0	0.618842	0.675704	0	0	0.978197	0	0.200378	0	0	0.526666	1.34481	0.932444	1.21701	0	1.62299	1.84054	0
WP_014256388.1	MKTLSIQNRIKVTVNGREIEVYDNLTILQALIQEDIHIPHLCYDIRLERSNGNCGLCVVTIIEPNGEREVKACQTPIKEGMVICTNSPKLENYRKVRLEQLLSDHNADCVAPCVMTCPANVDIQTYLRHVGNGNFEAAVRTIKERNPFPVVCGRVCPHPCEAACRRNLVDSPVAINYVKRFAADWDMSQPTQWLPKKNPPTGKKIAIVGAGPSGLSAAYYSAIKGHDVTVFERQPKAGGMMRYGIPEYRLPKATLDKEIDLIRSLGVKIMTEKALGTHIRLEDLSKDFDAVYLAIGSWTPTPLHIEGENLDGVWLGIRFLEQVTKNAEINLGDTVVVIGGGNTAIDCARTALRKGAKSVKLVYRRTRDEMPAEPYEVEEALHEGVEMLFLMAPTKITSV…	[FeFe] Group A1	[FeFe] Group A1	Evolving	Labile	1	[FeFe]-centre, 3 x [4Fe4S] clusters, 1 x [2Fe2S] cluster	None	4.59908	4.74113	4.83739	3.61881	4.65376	4.0125	4.29586	6.36604	4.60884	5.48052	0.913509	1.89811	3.22306	6.02146	3.38823	1.88475	7.66555	3.87876	10.5909	3.94835	2.31368	3.37852	2.69545	6.24286	1.5471	2.02711	3.87074	11.5842	9.29287	4.03249	1.8034	6.44305	6.91323	4.21333	8.06885	1.86489	1.82551	1.97687	3.24599	2.45405	6.42506
WP_013255981.1	MKQSLAPVIQIDESKCVNCHACIAACPVKYCIDGSGSTVTIHHDLCIGCGKCIEACTHNARSVVDDTEAFFDALSRKEPMIAIVAPSVASSFPDSYLRLNGYLGSLGIEAFFDVSFGAELTVASYINHIKRDDPDLVIAQPCPAIVTYIEIYHPELIPYLAPAHSPMLHTIAMIREYRKEFADHNVAVLSPCIAKKREFAETKMGDYNVTFLMLKAYMKAKGITLSSYPEVDFTGPDAERAVMFSTPGGLMQTVERSSPELLSGIRKIEGVPGMYEYLAELKAVLDKGMQPRLVDCLNCDLGCNGGTGTGLSQAHADEIEYPIKKRRSEAIRKYGKGPLKPKVQAKKVDKIISQYWNEGLYRRKYRDLSNNFSLKTPNAEELEQIYKSMLKENEEDFLN…	[FeFe] Group C	[FeFe] Group C2	Sensory	Labile	1	[FeFe]-centre, 2 x [4Fe4S] clusters, PAS domain	Fusion with methyl-accepting chemotaxis protein	1.47068	3.13782	6.04674	0	0	0.573215	1.84108	0	1.72832	0	1.82702	1.89811	0	0	4.74353	2.513	11.4983	1.93938	1.76515	3.94835	0	1.68926	0	6.24286	1.5471	0.675704	0.967684	0.891093	0.489098	0.672082	0.200378	1.93292	0	1.58	1.34481	0	0	0	1.62299	0	0
WP_013174329.1	MANVTIDGIQVSVPDGSTILQAAQVAGVHVPTLCYHPDQAIKANCRICVCEVEGQRLLQAACSQPVYDGMVIKTHSPKVIEARKTILELILAHHPQDCLGCIRNQNCELQALAEEYAIRDNPFEQMVRGLPKDTSTPSIVRDPDKCVLCRRCISACSVTQTVNALGIENRGNHAMVVPSLGKDLIESPCVMCGQCIHACPVGAISEKEQIDEFLAAVADPDKIVVTQIAPAVRTAIGEEVGMATGEMPMEVFVAGLRQIGFDYVLHTNFTADLTIMEEGNELLKRLKEGGKLPMFTSCSPGWINFCETFYPDLLEHLSTCKSPQQMFGALVKTYWAQKMGIDPSKIYSVSIMPCTAKKFEASRPEMKDSGYRDVDLVLTTREVGRLFRMAGIDFKTLTP…	[FeFe] Group A1	[FeFe] Group A1	Evolving	Labile	1	[FeFe]-centre, 3 x [4Fe4S] clusters, 1 x [2Fe2S] cluster	None	0.733452	0.548549	0	0.904703	1.55125	1.14643	0.613694	0	1.72832	0	1.82702	0	0.644611	0	0	0	0	0	0	0	0	0	2.69545	0	0.309421	2.70282	0.967684	0	0.489098	1.34416	0.400756	0.644305	1.15221	0	0	0.932444	0.608504	2.9653	1.62299	1.84054	0.917866
WP_028318925.1	MIKRQAATLTIDGRPVAIDGEKNLLELVRKVGIDLPTFCYHSDLSVYGACRLCLVDVDGRGILGACSTPPEPGLVVRTNTQELREIRKIAVELLLANHDRECTSCVRSGSCQLQDIARRLGITTIRYRSIHQPKPVDASSPSLIRDPNKCVLCGDCVRFCDEIQSVGAIDFAHRGHDAAVLPAFGRDLGAGECVNCGQCASVCPTGALAPASEIEAVWQAIYDPGTVVVAQIAPAVRVAIGEQFGSEYGLNTTGQVVAAMKRMGFDIVYDTSFTADLTVVEEANEFIARKSNGERLPLFTSCCPGWVKFAEQYFPQLLGNLSSCRSPQQMMGSMVKHTLPAQLGRERKDIVMVSIMPCTAKKFEARRPEFRTAGIPDVDYVLTTQELARMIEESGLSLN…	[FeFe] Group A3	[FeFe] Group A3	Bifurcating	Labile	3	[FeFe]-centre, 3 x [4Fe4S] clusters, 2 x [2Fe2S] cluster	NADH dehydrogenase, thioredoxin	0.273562	0.0552622	0	0	1.55125	0	0	0	0	0.913421	0	5.69432	0	0	0	0	0	0	0	0	0	0.563087	0	0	0	0.675704	0	0	1.4673	0	0	0	0	0	0	0	0	0	0	0	0
WP_020815562.1	MSTVNITIDGKKLQVEQGITILEAARQASIKIPTLCFLKDINEIGACRMCLVEIKGARALQASCVYPVAEGLEIYTQSPAVREARKVTLELILSNHDKKCLTCVRSKNCELQNLAEELNIKDIRFEGDSTNLPLDDFSPSIVRDPNKCVLCRRCVSMCKNVQTVSVISAAERGFKSTISCAFDRSLADVPCTMCGQCISVCPVGALREKDDTEKVWSALDDKELHVVVQTAPAVRVALGEEFGLPIGTRVTGKMAAALNHMGFAKVFDTDTAADLTIMEEGTELLNRIKNGGKLPVITSCSPGWIKFCEHNYPEFLENLSSCKSPHEMFGAVLKTYYAEKMGIDPKKIFVVSVMPCTAKKFEAQRPELSATGLPDVDVVITTRELARMIKEAGIDFNNL…	[FeFe] Group A3	[FeFe] Group A3	Bifurcating	Labile	4	[FeFe]-centre, 3 x [4Fe4S] clusters, 1 x [2Fe2S] cluster	NADH dehydrogenase, thioredoxin, thioredoxin	0.37614	0.481194	0	0	1.55125	0	1.22739	0	0	0	0.913509	0	0	0	2.71059	0	0	0	0	0	0	0.84463	0	0	0.618842	0	0	0.891093	0	1.34416	0	1.93292	0	0	0	0	0.608504	0.988435	0.540998	0	0.917866
WP_028586843.1	MAGCRAQSPPVAPVDLSSIQPVKEGTMREIEGVFYQSNAPKGVDPANIFFVQVDATKCEACGTCEEVCPTGIIQSINDDGIRQVVNTAACVNCGQCLVNCPFGAIYEGVSYVDEIFEKLRDPNTIVVSMPAPAVRYGLGECFGNPTGAYVGGKMHAALKAMGFDYVWDNEFTADVTIMEEGTELIQRVQEQGKKGARPLPQFTSCCPGWVKFAESFYPDLLPNMSSCKSPIGMLGPLAKTYGAHEIHAEGKKIYTVSIMPCIAKKFEGLRPELADSGFRDIDATIDTRELAYMIKTAGIDFNNLPDIQPDPVLGMSTGAATIFGNSGGVMEAALRLAYEVLSGKKLGDPDIKIVRTHEGINTADVDVPGFGTVKVAVASGLQNAAKLCDEVRAGTSPYH…	[FeFe] Group A1	[FeFe] Group A1	Evolving	Labile	2	[FeFe]-centre, 2 x [4Fe4S] clusters	Small subunit	0.237606	0.134966	0.604674	0.904703	0	0	0	0	0	0	0	0	0	0	0	0	0	0	0	0	0.578419	0	0	0	0	0	1.93537	0	0	0	2.40454	0	0	0	0	0	0	0	0	0	0
WP_012281726.1	MAERIVVDPITRIEGHLRVEAKVEGGKIIDAASSGTMIRGIEIIARDRDPRDVWALVQRICGVCTTTHALTSIRAVEEALQIRVPKNAELIRKIMLAVIHIHDHVVHFYHLHAPDWVDVPKALQADPRRTAELAQSISRWPKSTAGYFRDVQDKLKAFVANGQLGIFANAYWGHPAYKLPPEANLMAVAHYLEALDWQKEIVKIHTVFGGKNPHPNYLVGGMASAINIDGDNAINIERFNLVGKLIDEALEFVLEVYLPDLLAIAAFYKDTAAYGGGLGNYLCFGDFSTAPNNDPSGFLLPRGAILNKNLSEVLDVDPRDPQQILEYTDHSWYEKAPKGLHPWEGETNLKYTGPKAPYETLDETGAFDKPYSWIKSPRWKGHAMEVGPLARMLVGYAKK…	[NiFe] Group 1d	[NiFe] Group 1d	Aerobic Uptake	Tolerant	3	[NiFe]-centre, 1 x [4Fe3S] cluster, 1 x [3Fe4S] cluster, 1 x [4Fe4S] cluster	Cytochrome b	0.615245	0.527359	0	0	0	0	0	0	0	0	0	0	0	3.01073	0	0	3.83277	0	0	0	0	0.140772	0	0	0	0	0	0	0	0	2.8053	0	0	0	0	0	0	0	0	0	0.917866
WP_013486531.1	MILFDTDVQELKYKVLREVVRLARADKLDDGYYDIPRTIIPGPKATMRCCIYRERAIVEERVRAAMGRGDMPGIVSVIDSACDECPVQRFSVTDACRGCIAHKCHAACPFGAISYEKHRAVIDPEKCRECGRCMKACPYHAIIERQRPCVAGCAAKAIEIDDQKKAKINYDRCTSCGNCVYQCPFGAMVDKSFILDVLDLLRQAQENPDLHIYAVLAPAIASQFSYAKIGQVVAGIRQLGFHRAVEAALGADIVAQKEAHELAEKGFLTSSCCPSFVRYVEINHPDLKPFISHNVSPMVETALLIKHHDPGAKVVFIGPCIAKKMEISLEKTQGAVDSVLTFEELQALFDGMEIPVDQLEEGPMDDASCFGRAFARSGGVTEAVRSVIEDEGLDLVLDP…	[FeFe] Group B	[FeFe] Group B	Evolving	Labile	1	[FeFe]-centre, 3 x [4Fe4S] clusters, 1 x [2Fe2S] cluster	None	0.822866	0.649648	0	1.80941	0	0	1.84108	0	0.576106	1.82684	0	0	2.57845	0	2.03294	0	0	1.29292	0	3.94835	0	0.422315	0	2.08095	0.309421	0.675704	0	2.67328	0	0	0	5.15444	0	0	0	0.932444	0	0.988435	0	1.22702	0
WP_002843191.1	MSFKGIYTAINKVRRDVFTEVAKFAYEDIHDFSKLEQIPYQIIPGEIATHRESIFLERAIVGERIRLAMGLPLRKINEHAALSTGITEETVNNNIYKAPFVNIIKFACNSCPDNEFFTTNTCRGCLARPCVEVCPKNAISMVNGKSFIDQEKCIKCGRCKSSCPYGAIAKLERPCANACGMDAITSDKYGRAKIDYDKCVSCGLCMSSCPFGAISDKTQIYQLIKEMKSGSKVIAEIAPAFAGQFGPKVTPEKLRVAMIELGFFDVVEVAIGADLCTIEEAEDFLSKVPEKLDFMATSCCPAWSVMAKKQFPEFKENISMAMTPMVLSARFIKQAHPDSKVVFIGPCVAKKSEATRKSVKSHVDYVLTFEEVMGMFEAKGINLEEMVPDKEVNYGTGAG…	[FeFe] Group B	[FeFe] Group B	Evolving	Labile	1	[FeFe]-centre, 2 x [4Fe4S] clusters	None	0.845718	0.741471	0.604674	1.80941	1.55125	3.43929	3.06847	1.59151	0	0	0.913509	1.89811	0	0	0.677647	0.62825	0	3.87876	1.76515	0	0	0.703859	1.34772	0	0	0	0	0	0	0	0.801513	0	1.15221	0	0	0	3.04252	0	2.70499	0	0
WP_021625383.1	MVTVTIDGREIRVPERTTILDAAHEAGIEIPTLCYLKDVNEIGACRVCVVEVEGIDQLVASCNNCALDGMVVHTDTPKVRQARKVNTELLLSQHDSECTSCVRSGNCSLQSFANDLGLVGLPYEKHLPDIEWDQNFPLIRNNDKCINCLRCIQICDRVQDCHVWDLANRAAHTSVNVIGGLPIDSVACALCGQCITHCPTGALRERDDTDRVWEALEDPDITTIVQIAPSVRTAWGDHWGMSNKEATVERLVACLRPMGFDYIINTDFSADLTIMEEGTELLERLKEGPHDHPMFTSCCPGWVRYVKSHYPELVDDVSTSKSPQQMFGAIIKSYYAEKLGVDPHKIFSISIMPCVAKKSECALPTMNDACGDPDVDVVLTVREVDRMIRSEHIDPRRLE…	[FeFe] Group A2	[FeFe] Group A2	Evolving	Labile	2	[FeFe]-centre, 3 x [4Fe4S] clusters, 1 x [2Fe2S] cluster	NADH-dependent glutamate synthase	4.46222	5.04198	3.02337	5.42822	13.9613	4.58572	4.90955	0	5.76106	11.8745	11.8756	0	3.86767	0	6.77647	0.62825	0	2.58584	1.76515	0	1.15684	4.92701	9.43407	6.24286	13.3051	12.8384	2.90305	4.45547	4.89098	0.672082	2.00378	6.44305	8.06544	3.15999	0	3.72977	1.21701	24.7109	4.32799	14.1108	0.917866
WP_021167212.1	MEMVNLTIDGQQVAVPKTSTVLEAALSIGIKIPTLCYHPELRVEGACRVCMVEVEGARSLVASCVYPVNEGMVVHTNSAAAREARKSVVELLLANHPTDCLSCQRNLNCELQNIAADVGVREIRFDGEKKSYPLDNQNPSLVRDQNKCILCGRCIRACSERQGVHVYSFANRGFNTTVVPAFSLGLDQVACTFCGQCAIVCPTGAIVEKDDTEAVWAALSDPKKHVIVQTAPAVRVALGEALDLPNGSIVTGKMVAALKRLGFDKVFDTNFSADLTIWEEGSELIDRLTNGGTLPMITSCSPGWVNFIELKYPDLLDHLSTAKSPQQMFGAIAKTYYAEKAGIDPKDIVSVSIMPCTAKKAEAARPEMNSSGYQDVDYVLTTRELGRMVRAAGINFAKL…	[FeFe] Group A3	[FeFe] Group A3	Bifurcating	Labile	3	[FeFe]-centre, 3 x [4Fe4S] clusters, 1 x [2Fe2S] cluster	NADH dehydrogenase, thioredoxin	1.46881	1.29	1.81402	0	4.65376	1.71964	0	0	0.576106	2.74026	6.39456	0	3.86767	0	0.677647	0.62825	0	1.29292	5.29544	0	0	0.422315	0	0	4.95073	2.02711	0.967684	2.67328	0	1.34416	0.801513	0.644305	1.15221	0	2.68962	0	1.82551	3.95374	0	0	0
WP_009609852.1	MDKVRVTIDGITVEVPSYYTVLEAAKEAGIDIPTLCYLKEINQIGACRICLVEIEGVRNLQTSCTYPVFDGMKVYTNTPKIREARRLNLELILSNHDRNCLTCVRSTNCELQALAKRLGVEEIRFEGENIRYPIDDGSPAVVRDPNKCVLCRRCVAVCSEVQNVFAIGMVNRGFKTMVAPSFGRSLKDSPCISCGQCIMVCPVGAIYEKDHTKRVYEALADDKKYVVAQTAPAVRVALGEEFGMPVGTIVTGKMAAALRRMGFDAVFDTNFAADLTIMEEGSELLERIKHGGKLPMITSCSPGWIAFCEKYYPEFIDNLSTCKSPHMMMGALVKSYYAEKKGLDPKDIFVVSIMPCTAKKLEIEREEMIRNGMKDVDAVLTTRELARMIKEMGIDFVNL…	[FeFe] Group A3	[FeFe] Group A3	Bifurcating	Labile	4	[FeFe]-centre, 3 x [4Fe4S] clusters, 1 x [2Fe2S] cluster	NADH dehydrogenase, thioredoxin, thioredoxin	0.849193	0.652189	1.20935	0.904703	1.55125	1.71964	0.613694	0	0	2.74026	0.913509	0	1.28922	0	0	0	0	3.2323	1.76515	0	0.578419	0.985402	0	2.08095	0.618842	0	0	0.891093	1.4673	0	0.601135	0.644305	0	0	1.34481	0	0	1.97687	0	4.29459	0
WP_015720170.1	MARTTLPFGPQHPVLPEPIHFSLVLEDEIVVQAIPKLGYVHRGLEKMAEIRDHNQMIQIVERTCGICSTLHAMCYCQGIEALMGVQVPDRAKFLRTVWAEMHRIHSHLLWLGLLADAFGFESLFMQAWRIRERIMDLQEATSGNRVIVSVNQVGGVKRDIKPETQKWILDTLKLVEKEVLQLKSTLMDDYTVKKRTVGIGVLSKEKAFALGACGPMLRASGIPQDMRQLGYAAYPFLDFAPVVETDGDSYARTVCRFNEILQGIDLIRQAFAKLPEGELSVKVTGLPTGEVVSRVEQPRGECMYYIKANGKKFLDRLRIRTPTFSNVAPLLELLPGCELADVPVLILTIDPCISCTER	[NiFe] Group 4e	[NiFe] Group 4e	Evolving	Sensitive	6	[NiFe]-centre, 1 x [4Fe4S] clusters	NuoL, NuoH, NuoC, [FeS] protein	0.168844	0.0271141	0	0	0	0	0	0	0	1.82684	0	0	0	0	0	0	0	2.58584	0	0	0.578419	0	1.34772	0	0	0	0	0	0.978197	0	0	0	0	0	1.34481	0	0	0	0	0	0
WP_021726228.1	MVTQLTSHMNEGEAEEPVTLVVDGTRVTVPRSATILEACRQAGQDVPTLCFLKGINEIGSCRICMVEVEGSERLVASCNNYVAEGMVIHTNSPKVRLARRENTRLLLSQHDVECPTCTRSDSCHLLDIATSLGVIGKPRQQMLMHSPWPQGFPLIRDNDKCIRCMRCIQVCDKMQSSHVWDITNRATHTFVDVARGADINDVDCTLCGQCITHCPTGALRERDDVERVYDALADPTVTTIVQIAPSVRTSWGDFWGLDDEQATIEHLVAALRPMGFDYVVNTDFSADLTIMEESAELLVHMRRNASGEGSGYPMFTSCCPGWVRFCKAHYPQLVDGLSTSKSPQGMFGAVVKSYYAERLGIDPHRIFCLSIMPCLAKKAEVAYPNLNDACGDPDMDCSL…	[FeFe] Group A2	[FeFe] Group A2	Evolving	Labile	2	[FeFe]-centre, 3 x [4Fe4S] clusters, 1 x [2Fe2S] cluster	NADH-dependent glutamate synthase	1.98761	1.82736	1.20935	0.904703	1.55125	1.14643	3.68216	1.59151	2.88053	2.74026	0.913509	3.79621	2.57845	0	0.677647	0	7.66555	1.93938	0	1.97418	0.578419	2.11158	4.04317	4.16191	2.16595	2.70282	1.93537	1.78219	0.978197	0.672082	1.20227	1.28861	0	0	5.37923	2.79733	0.608504	5.93061	0.540998	3.06756	0.917866
WP_021626398.1	MADTMRGVYTNLTKIRRDVFREVAKICYSIPSHPESGDEYFDDAFENLPYKILPGDVATYRESVFLERAIISERIRLALGLPLQGVDKPRRVSEGIKEATTNGLDYYKPPLINVIKFACNACKDNVYEVTNSCQGCLAHPCREICPKQAISFHNKRAVIDQDLCIKCGRCAQICPYHAIHHHVRPCADACGMHCIGSDEHGRAEIDYEKCVSCGQCLINCPFGAIADKSQIAQVIFSILQGEEVIAAVAPAFVGQFGGKGNVGKLREAFKLLGFSGVEEVALGADLCTVQEAEDYLSEVPDKLPFMGTSCCPAWASMAKKEFPEHKEAISMALTPMVLTARMIRSQHPNAKIVFVGPCAAKKGEALRKSVRSEVDFVLTFEEMAGMMEAKDIDYLRLHD…	[FeFe] Group B	[FeFe] Group B	Evolving	Labile	1	[FeFe]-centre, 2 x [4Fe4S] clusters	None	3.00819	2.76414	1.20935	2.71411	1.55125	6.87858	3.06847	3.18302	3.45663	0.913421	0	1.89811	0	12.0429	2.71059	0	0	5.17167	3.53029	0	1.15684	1.12617	0	0	0.309421	3.37852	0.967684	5.34656	4.40189	2.68833	3.20605	5.15444	5.76103	4.21333	2.68962	1.86489	5.47653	6.91904	3.78699	0.613512	4.58933
WP_013810492.1	MEIEGSRNLQAACVYPVAEGLRVHTHTPRVRKARRRVVELLLSEHNRECPTCPRSANCELQALARKVGARYGKLASQPRCEPKIVKNPFIVRDYSKCVKCRRCEAVCKNMQGIGVYVPLNRGYETIIAPAFERNLAEVACIACGQCLLACPTASLTERSYIEEVWQALDDPAKHVVVQTAPAIQVSIGEEFGLPAGTVVSGKLAASLRRLGFDSVFSTDFAADLTIMEEAHELLHRLAKGGPLPLISSCSPGWIKFCEHFYPEFIDNLSTCKSPMEMFGALAKTYYAQKAGIDPKDMVVVAVMPCTAKKFEAARPEMTTYGLRDVDYVLTTRELAKMLRQADINLNKLPEEDFDQPLGLSSGAANIFATTGGVMEAAIRTALALTEGKELGRLEFKEFR…	[FeFe] Group A3	[FeFe] Group A3	Bifurcating	Labile	2	[FeFe]-centre, 3 x [4Fe4S] clusters, 1 x [2Fe2S] cluster	NADH dehydrogenase	0.145817	0.0197601	0	0	0	0	0	0	0	0	0	0	0	0	0	0	0	0.646459	0	0	0	0.563087	0	2.08095	1.5471	0	0.967684	0	0	0	0	0	0	0	0	0	0	0	0	0.613512	0
WP_023388270.1	MDMVHVKINNKEIMVPKGATILQAARELNINIPTLCHLDLHNIKMVNKGASCRVCVVEVEGRRNLAPACSTPVFEGMVIKTDSMRAIKSRRTMVELLISDHPKDCLVCLKNQDCELQQLAADLGVRNIRYSGEMSTYPVDAASKAIYRDLSKCVLCRRCETMCNDVQTVYALSGVGRGFDTVVGPAFNAPMHKTVCTFCGQCVAVCPTGALVEVDNVPKVWDLLENKKKTVVVQVAPAVRVALGELFGLAPGTIVTGKMVSALKTLGFDFVFDTDFAADLTIMEEAHELIERVTEGTNLPILTSCCPAWVKFFEHQFPDLLNIPSTCKSPHEMFGAVTKTYLASKLGLKREDMVVVSVMPCVAKKYEAARPELESKGLQDVDVVITTRELGRMIKEAGI…	[FeFe] Group A3	[FeFe] Group A3	Bifurcating	Labile	3	[FeFe]-centre, 3 x [4Fe4S] clusters, 1 x [2Fe2S] cluster	NADH dehydrogenase, thioredoxin	1.1236	1.61451	0.604674	0	3.10251	1.71964	1.84108	0	2.88053	4.5671	6.39456	0	0	0	1.35529	0	0	0	0	0	1.15684	0.140772	2.69545	0	0	2.02711	0.967684	0	0.489098	1.34416	0.400756	3.22153	5.76103	0.526666	1.34481	0.932444	0.608504	2.9653	0	1.84054	0
WP_013275513.1	MEMVTLTIDGEKVQVPKGTTILEAARKIGKKIPTLCFLKEINEIGACRMCVVEVKGARALQASCVYPVSEGMEVFTNTPAVRESRKITLELLLSDHNLECPTCIRNLNCELQKLAEELGIKSIHFEGEKHRSIYDDFSPSIVRDTSKCVLCRRCVSTCHKVQGVGVISPNHRGFETMVAPVFDMSLADVACVNCGQCILACPVGALKEKDDTDRVWKALADPEKHVIVQIAPAVRVSLGEEFGLGRGAIVTKKIPAALRRMGFDRVFDTDFSADLTIMEEGHEFIERLQHGGKLPLITSCSPGWIKFCEHYYPEFLENLSTCKSPQQMFGAVAKTYYAQKVGIDPSKIFVVSIMPCTAKKYECQRPEMRSSGYQDVDVVLTTRELSRMLKEAGINLAAM…	[FeFe] Group A3	[FeFe] Group A3	Bifurcating	Labile	3	[FeFe]-centre, 3 x [4Fe4S] clusters, 1 x [2Fe2S] cluster	NADH dehydrogenase, thioredoxin	2.38636	2.34514	3.02337	0.904703	7.75626	2.29286	2.45477	4.77453	5.76106	6.39394	2.74053	3.79621	2.57845	0	2.03294	3.14125	0	6.46459	0	0	0	2.53389	1.34772	4.16191	0.928262	6.75704	4.83842	3.56437	0	0	0.801513	3.22153	1.15221	0.526666	1.34481	0	0	5.93061	1.082	4.29459	0
WP_022362192.1	MVNLTINNRPVSVPEGTTILDAAAGIGIMIPHLCYLRDINEIAACRVCQVELQGKEKLITACNNKVEEGMVIFTNSPKVRETRKTIVRLILSQHDCRCAICVRSGNCELQKIANDLGCIENPYNGRIEHNDWNPEFPIIRDNAKCIKCMRCIQVCEKIQTLHVWDVVNTGSRTTVDVANGRKIEHADCAACGQCVTHCPVGALREKDDIGKVLAALNDPETITVVQVAPAVRTAWGEDLGMPGDVATEKRLASVLRHIGFDYVFDTNFSADLTIMEEGNEFIERLKNPDKSRLPMFTSCCPGWVRFVKSQYPEFVDNLSTAKSPQQMFGAVVKSYFAKKADIDPSRICSVSIMPCTAKKAEAAYDNMSSAGYGQDVDYVLTTREFARLVRGEAIIPEAL…	[FeFe] Group A2	[FeFe] Group A2	Evolving	Labile	2	[FeFe]-centre, 3 x [4Fe4S] clusters, 1 x [2Fe2S] cluster	NADH-dependent glutamate synthase	7.41211	12.0375	6.04674	6.33292	7.75626	4.58572	6.13694	6.36604	7.48937	1.82684	4.56754	5.69432	2.57845	0	18.2965	13.1933	26.8294	5.81813	10.5909	1.97418	1.73526	10.6987	14.825	6.24286	12.9957	12.1627	5.8061	6.23765	5.38008	6.72082	21.8412	5.79875	2.30441	5.26666	6.72404	4.66222	3.04252	16.8034	2.70499	12.8838	5.5072
WP_022847517.1	MAETVTIKIDGKKYTVESGQTILEICKKLGIYIPTLCFMEEISEGGHCGLCIVDVKGAKTFQRACITEVRDGMEIETNTPAVREVRKTVFEMILADHKVECPVCKRDETCEIRKVAKHLGFPDFEVEPIYRDEGVDNSIISREPAKCIKCQRCVNTCELIPGIGIYGYFGKGHDATVEPPESLSMSDTPCIVCGQCVVRCPTGALTERDDTEKVLEAIYDPDKVVFASFAPSVRVAIGEPFGMEPGEVVVGKLVSALRKLGFDRVYDVNFGADLTIVEEANELIERIKNGGVLPMATSCCPGWVSFVERFYPEFIPNLSSCKSPQAMLGALVKNYMKEVEGIPEENVVHVTIMPCTAKKYEASRPELSGDTDYVLTTRELARLLKRFDIDLSKLPEDEA…	[FeFe] Group A3	[FeFe] Group A3	Bifurcating	Labile	3	[FeFe]-centre, 3 x [4Fe4S] clusters, 1 x [2Fe2S] cluster	NADH dehydrogenase, thioredoxin	0.265819	0.133211	0	0	0	0	0.613694	0	0	1.82684	0.913509	0	0	0	0.677647	0	0	0	0	0	0	0	0	0	0.309421	0	0	0.891093	0	0.672082	0	0	0	0	0	0.932444	0	0.988435	0	0.613512	0
WP_008749893.1	MVNLTIDNIPVSVKENTTIMEAAAGINIEIPKLCFLKGLNEIAACRVCVVELKGKDKLITSCNNVCEEGMEIFTNSKKVIRDRRKTVELILSQHDNRCVICAKSGNCSLQKVANDLNILEIPFAVELEKQPWNKNFPLIRDSSKCIKCMRCIQVCDKMQTLSVWDLHGTGARTTVNVTGYKKIEDANCSLCGQCITHCPVGALSERDDTSKFWDAVADPEKTVVVQIAPAVRTAWGEVFGLKDKDATVGKIVDALKKMGADYVFDTSFSADLTIMEEANEFVHRYTNGLIGDRPMFTSCCPGWVRFAKSQFPRMAKSLSTAKSPQQMFGAVMKSYFAEKIGVNPENMVSVSIMPCVAKKGEREMELFHGEYAGHDVDIALTTRELTRMIRASHIDPKSL…	[FeFe] Group A2	[FeFe] Group A2	Evolving	Labile	2	[FeFe]-centre, 3 x [4Fe4S] clusters, 1 x [2Fe2S] cluster	NADH-dependent glutamate synthase	3.84819	5.74717	1.20935	1.80941	6.20501	5.15893	3.06847	6.36604	3.45663	0.913421	6.39456	7.59242	1.93383	3.01073	4.74353	0	3.83277	3.2323	1.76515	9.87088	2.89209	1.26695	2.69545	6.24286	2.47537	2.02711	0.967684	1.78219	6.35828	1.34416	3.40643	3.22153	1.15221	7.37332	4.03442	2.79733	4.25952	6.91904	2.16399	7.97566	10.0965
WP_012862884.1	MSYISVKSLNCKNCYKCLKYCTVKSIKYRNDKVEVIDEKCILCGECINICPQEAKKVISDIDKVKELVTNKNVKKIVSIAPSYISAYPDKNKLVSGLLKLGFDGVEETAVGAAYVTEEYKKLINKMEMDNILTSCCPTINLMISKYSPELINNLAPVLSPVLVHGKLIKEKYGPETSVIFIGPCLSKIYEINQDEDSRNVDFAITFQDLDKWLLDENINLETITPKEFDTDSPYSRVYPISQGILYDLKNHFKDKDSGDKISKYDLLSVSGLKDVENILNEISNGKIKNVFIEINACSNGCVNGPMMPKNRTSVLEDTIKIKRYAEEIKDNENKFDRNDLNKKFFNEKIEDFIPGEDKLKDILMQIGKIKKDDELNCGSCGYDTCRDKAIAVYQGKAEL…	[FeFe] Group C	[FeFe] Group C3	Sensory	Labile	2	[FeFe]-centre, 2 x [4Fe4S] clusters, PAS domain	Phosphatase	1.65573	1.59934	1.20935	0.904703	1.55125	2.86607	0.613694	3.18302	0	1.82684	9.13509	0	0	0	1.35529	0	0	0.646459	3.53029	0	1.73526	0.985402	2.69545	0	3.09421	0	0	1.78219	1.95639	1.34416	1.40265	1.93292	0	0	1.34481	3.72977	1.21701	1.97687	1.082	2.45405	0.917866
WP_015359537.1	MECLTLKKSNCKNCYKCIRHCPVKSIRFSGNQAYIIGDECIMCGQCFVVCPQNAKQIVDETEKVKVLLQSGAPVVVSLAPSFVANYEVGIEAMREAIKKLGFYDVEETAIGATIVKREYERLVKDEERDIIITSCCHSVNLLIQKHFPRCLPYLADIMSPMQVHCKDIKKRIPNAKTVFIGPCVAKKDEAQQYKGIVDAVLTFDELTAWLKAENITLEKKTDSNENSRARFFPTTGGILKTMDKKNPKYVYMAIDGAENCIAALRDIEKGNLHHCFIEMSACAGSCIGGPVMEKHHRSPVRDFAVISRYAGKKDFLVEQPSRAEIRKDFEIIEQRLREPTEEEILDTLRQMGKMKPSDELNCGSCGYNTCREKAIAICQGKAEISMCLPFLKEKAENFS…	[FeFe] Group C	[FeFe] Group C3	Sensory	Labile	3	[FeFe]-centre, 2 x [4Fe4S] clusters, PAS domain	Phosphatase, thioredoxin	20.7298	21.0272	1.81402	1.80941	99.2802	6.87858	5.52324	14.3236	41.4796	110.524	21.9242	17.083	16.1153	0	79.9623	0	3.83277	7.11105	0	0	0	21.6788	168.466	14.5667	95.611	21.6225	5.8061	2.67328	20.053	22.1787	0.200378	9.02027	8.06544	0	0	2.79733	6.08504	22.734	2.70499	93.2539	1.83573
WP_013120942.1	MITLSIDGQKVEVEPGTSILEAARLNGIYIPTLCYLKELNEIGACRVCLVEIKGARTLQPSCTYPVAQGMEVFTHSPRVIKARKLVLELYLSNHPFECLTCVRNQRCELQSLAERYHVRHLKVHGELKRYPIDDQSPAMVREPSKCVVCRRCIRVCKDVQEIGIYQLVERGFDTVASPAFKKSLAETPCIYCGQCLQLCPTAAIHEKEDLEAVWRALADPEKHVVIQTAPSIRGTLGEGFGMPAGSLVTGKMVAALKKLGFAKVFDDCFGADIVCIEEGAELIHRLENGGPLPQFTSCCPGWLRFALLFYPELIPHISSVKSPQQVFGALLKTYYAKQSGIDPKKIFSVSVMPCVAKKWERQRKIGTHDSGYQDVDVVLTTRELIQMLRSAGINLAELP…	[FeFe] Group A3	[FeFe] Group A3	Bifurcating	Labile	3	[FeFe]-centre, 3 x [4Fe4S] clusters, 1 x [2Fe2S] cluster	NADH dehydrogenase, thioredoxin	0.826505	0.670014	0	1.80941	3.10251	0	1.22739	1.59151	1.15221	0	0	0	0	3.01073	0	2.513	0	0.646459	0	0	1.15684	2.25235	0	0	0.309421	2.02711	0.967684	0	0.489098	0.672082	0.400756	0	2.30441	2.10666	0	0.932444	0	4.94217	1.082	1.22702	0.917866
WP_006566021.1	MSKHLPVDVRVPIDSDNPSIMRHEEKCIKCGQCKNICKDYISVLGTYSLAETKDRAVCINCGQCANVCPVESITETYEYQQVREAVKDPEKIVIVSTSPSVRAALGEEFGTEEGMFVQGKMVALLRALGADYVLDTNFSADLTIMEEASELIERITKGTKPLPQFTSCCPAWVKFAEIYYPELLDHISTAKSPIGMQGPTIKTYFAKLMGIDPEKIVNVALTPCTAKKFEIRREEMKDAGISYGKEDMRDMDYVITTREAALWANEEKIDFMGLEDSDFDKFMGEGSGAGVIFGNSGGVMEAALRTAYEFITKEKAPDILYDLKPVRGMEGVKEASLDIGDLTVNVAVVYGTGNARKMIDKVKSSDKQYHFIEVMTCPGGCIGGGGQPKDKEFKGQIIQ…	[FeFe] Group A1	[FeFe] Group A1	Evolving	Labile	1	[FeFe]-centre, 2 x [4Fe4S] clusters	None	279.032	296.236	209.822	198.13	212.522	261.386	302.551	276.923	250.606	203.693	271.312	269.531	293.298	319.137	265.637	240.62	249.13	316.119	351.264	238.875	321.022	216.788	163.075	305.9	182.868	241.902	242.889	341.289	209.823	413.33	209.395	336.972	395.207	571.959	363.098	396.288	401.004	225.363	338.665	187.121	328.596
WP_013823945.1	MGLITTNEAQCRDCYRCLRGCAVKAIRFSAGAESGALHARVIDELCVQDARCVLSCPQKAKKVARDLDEVRQLLKEGHPLAATVAPSFVAAFPLQDPEQMPALLRKLGFERVQETSLGAELVVQMHRRLGLDRPLISSACPVVVNLIERHYPALLPLLAPVVSPMIAHGRLLKKMYPGYRTVFIGPCVAKKAEARTEGINDAIDYVLGFDELWEWVQEEGLDPGSLPAGEFDPPRPGRARLFPVEGGLISALQFDLQREESYLTITGLQNCITFLNHLSHNKIPGPPALMELLACRGGCIDGPLSLCRAEDIYTRRGKVRDYYRSRSKEETPGTAGGVELPSSLMYREYSDRSVSLPLPDEHALRQILAQAGKYRPEDELNCGACGYDSCRDKAVAVYR…	[FeFe] Group C	[FeFe] Group C3	Sensory	Labile	2	[FeFe]-centre, 2 x [4Fe4S] clusters, PAS domain	Phosphatase	0.198213	0.00563623	0	0	4.65376	0	0	0	0	1.82684	0	0	0	0	0	0	0	0	0	0	0	0	1.34772	0	0	0	0	0	0.489098	0	0	0	0	0	0	0	0	0.988435	0	0	0
WP_013771726.1	MHEGQESEHVTVTVDGRSMQLREGTTLLRALQAEGVDVPSLCHDGRLERANGSCGLCVVEVGTGADGATRDVKACITPVSAGMVVTTVNPRLREYRAVRLEQLLCDHNADCVAPCVQTCPANIDIQTYLHHVATGNFEAAIRVIKDRNPFPSACGRVCPHPCEAECRRNLVDEPVAINHVKRFVADWDRAREEPWTPRLADPSGKRIAVVGAGPSGLSAAYYAALAGHRVTVFEKEDRPGGMMRYGIPEYRLPKATLDEEIAFMEAIGVEIVTGKALGTHLRLDDLRREHDAVYLAVGSWRATPLKLDGEHLPGVHLGIDWLRGVVQGVDEPVGDTVVVVGGGNTAIDCVRTALRRGARDVKLVYRRTRDEMPAEPLEIEEALHEGVDMVFLAAPTGIT…	[FeFe] Group A1	[FeFe] Group A1	Evolving	Labile	1	[FeFe]-centre, 3 x [4Fe4S] clusters, 1 x [2Fe2S] cluster	None	21.851	27.8204	23.5823	12.6658	21.7175	24.075	22.7067	23.8727	17.8593	8.22079	28.3188	13.2867	38.6767	18.0644	27.1059	3.7695	19.1639	25.8584	14.1212	7.8967	15.0389	25.1981	18.8681	10.4048	29.0856	36.488	32.9013	35.6437	22.9876	16.13	17.8337	23.8393	21.8919	24.7533	22.8617	24.2435	20.0806	21.7456	17.3119	20.8594	22.9467
WP_013738980.1	MVNLTINGLPVQAPESATILEAAALVNIHIPTICFLKDINEIGACRVCVVEIEGVDKLASACNNRVREGMVVLTNSPRVRQTRRTNVELILSEHDCFCATCVRSGNCALQKVANDLGILELPYERRPAPTKWDHSFPLFRDAAKCIKCMRCIQVCDKIQGLNIWDLVGTGSRTTVDVSFSRKITDADCALCGQCITHCPVGALRERDDTQRMFQAIANPKKITVIQIAPAVRAAWGEALGLPREKATVKRLVAALRKIGFDYVFDTTFSADLTIMEEGHEFLERLAGRNDHPWPMFTSCCPGWVRFIKSQYPDMTENLSTAKSPQQMFGAVAKTYYAQLLGANPADIFSVSIMPCVAKKSEAELPTMNDAEAAQDVDLVLTTREIVRMIRAEKIDVKSL…	[FeFe] Group A2	[FeFe] Group A2	Evolving	Labile	2	[FeFe]-centre, 3 x [4Fe4S] clusters, 1 x [2Fe2S] cluster	NADH-dependent glutamate synthase	6.50684	6.9351	9.67478	9.04703	15.5125	5.15893	4.90955	6.36604	10.3699	5.48052	5.48105	5.69432	7.73534	6.02146	3.38823	1.88475	7.66555	7.75751	3.53029	5.92253	3.47051	5.91241	21.5636	4.16191	5.56957	8.10845	3.87074	6.23765	8.80377	7.3929	5.20983	4.51014	3.45662	4.73999	6.72404	6.5271	1.21701	23.7224	1.082	11.6567	2.7536
WP_014184036.1	MDIQLTINDIPVKVPEGTTILDAARTVNIDIPTLCHLKLHEMHYNNNIASCRVCVVEVEGRRNLASSCSTPVTQGMVVKTDSLRAIQARRAMVELLLSDHPKSCLTCAKNINCDLRALAAELGVRAISYAGEESEFEIDHSSSSIVRDPNKCIRCRRCETMCSQVQTVGVYSAVGRGFETVIKTAFNLPLSQTACTFCGQCLAVCPTGALTELDQVDKVWKALNDPDKFVVVQTAPAVRVALGEEFGLEPGTIVTGKMVAALRRLGFDRVFDTDFAADLTIMEEATELVHRIQHGGRLPLLTSCCPAWVKFFEHQFPDLLDIPSTCKSPHQMLGVLTKSYYAKTLGIDPKSITVVSVMPCVAKKYEADRPELSQGTDTADVDIVITTRELARMVREASI…	[FeFe] Group A3	[FeFe] Group A3	Bifurcating	Labile	3	[FeFe]-centre, 3 x [4Fe4S] clusters, 1 x [2Fe2S] cluster	NADH dehydrogenase, thioredoxin	0.85484	0.690774	0	0.904703	3.10251	0	0	0	0	3.65368	0	1.89811	4.51228	0	0.677647	0.62825	0	1.29292	0	0	0	0.703859	1.34772	0	2.16595	0	1.93537	0	0.978197	0.672082	1.00189	0.644305	0	0	0	0	0	3.95374	0.540998	0.613512	0
WP_026894721.1	MRKFENQVQLIKYEVLKEVSKLAFKGTIKEERHKIPKTIIPGPEPRSRCCIYKERAIIEDRVELAMGGNKENKNIIEVLDIACDACPINRFVVTEACRGCLAHRCSEACPVGAIRHVGHKAYIDNNKCVECGRCREACQYNAIADVMRPCREACPVGALSIDKDKKAVIDNEKCIQCGACVYQCPFGAIVDKSFIVEVIDLLNRAKEEDIHVYAAIAPAISSQFYYAKIGQVVNGLKKLGFYDVVEVALGADIVAQHEAEEFKETIEDKGVMTSSCCPAFVSHINKNYPMLKDKVSSSVSPMIAISRLIKNIDDNAKVVFIGPCIAKKMEIKEKDLYGTTDYVITFEELAAMLDGAEIDLEYLEEDSLDNASFYGRVFARSGGLTEAIRHVVGKEKYDI…	[FeFe] Group B	[FeFe] Group B	Evolving	Labile	1	[FeFe]-centre, 3 x [4Fe4S] clusters, 1 x [2Fe2S] cluster	None	0.866862	0.751009	0.604674	0	3.10251	0	0	0	0	0.913421	0	1.89811	1.28922	0	0	0	0	1.29292	1.76515	5.92253	0	0.563087	1.34772	0	0	0	0	0	0	0	0	0	1.15221	0	1.34481	1.86489	0	2.9653	0	2.45405	0
WP_006571748.1	MRGVETRIQEIRHRIFREVARMAYHTEWPVDKRIEELPYKIIPGEVGNFRNDVFLERAIVGERLRLAMGLPCRSAAEHAPLSDNIEAADKDETYYTPPLINVIKFACNGCAEKKVMVTEGCQGCLAHPCEEVCPKDAIKLDRYNGRSHIDQDKCIKCGRCADVCSYKAIIIQERPCAVACGVDAIHTDINGKAEIDYDKCVSCGMCLVNCPFGAIADKSQIFQVIRAIQSGERVYAAVAPAFVGQFGPKVTPGKLRAAMKQLGFADVFEVAVGADLCATQEAEDFIREVPNELPFMGTSCCPAWSVMAKKSFPDHANCISMALTPMTLTARLIKHNHPNGKVVFIGPCAAKKLEAMRKSVRSEVDFVLTFEEMAGIFDAKHVDLATIEEDPTGVNDAST…	[FeFe] Group B	[FeFe] Group B	Evolving	Labile	1	[FeFe]-centre, 2 x [4Fe4S] clusters	None	36.0804	37.563	21.7683	42.521	13.9613	25.7947	21.4793	19.0981	22.4681	19.1818	27.4053	55.0451	50.2797	63.2253	10.1647	31.4125	45.9933	53.0097	63.5453	29.6126	85.606	16.4703	17.5204	37.4572	29.0856	12.8384	36.772	28.515	24.4549	43.6853	38.0719	43.1684	34.5662	67.9399	77.9989	53.1493	54.1568	23.7224	16.7709	25.154	37.6325
WP_015925729.1	MSIIQFKEANCKNCYKCIRSCPVNAIAFKNDQAEIIHDECMLCGNCLTVCPQNAKSVNSDVQKVKKFIQKREKVYVSLAPSFISAFDHDEKWVYYALKKLGFTHVEGTANGAYQVSRQYESLLKQRKMKNIITSCCSSIILLIEKYYPQLLDQLAPVVSPMIAHAKMLRETYGQRIRVVFIGPCISKKEEFDDLQNGNQIDAVLTFDDLDKWFEEEGLYESDEPIVGIKNFDTSARIYPIPGGILKTIDRKYKKNYRSISVDGVERCMDVLQSILEGDIENYFIEMSSCKGGCLGGPYMKNVPGGFLTARERLLNYAKRTGIKTETDLTSSVMALTKVDLSKKFIDRSKKLEIPSEAVIQGILNSIGKFSKDKELNCGACGYHSCREKAIAVFHGKAQV…	[FeFe] Group C	[FeFe] Group C3	Sensory	Labile	3	[FeFe]-centre, 2 x [4Fe4S] clusters, PAS domain	Phosphatase, thioredoxin	0.274334	0.136751	0	0	1.55125	0	0	1.59151	1.72832	0	0	0	0	0	0	0	0	2.58584	0	0	0	0	0	0	0.309421	1.35141	0	0	0.489098	0	0	0	0	0	0	0	0	0	0	0	0
WP_015707165.1	MAVIQIDKDICTGCQECTKVCPVYAIEGNPGEAQTLVAERCVMCGQCVQKCKSYVSLIDHGPEMYNKKREERMLPETVREPLFAAHNVSHLAEVIKALGDPSLFTIVQAAPAVRVGIAEDFGLPLGSLASGKMAAGLRRLGFKKVYDTNFSADLTIMEEGTELVKRVTEKGVLPMFTSCCPGWVRYMENNHPELTKHLSSCKSPQQMAGAVFKTYGAKLDGVKGAKVYNVSVMPCTCKTFEAARAEMNSSGWQDIDVVITTRELGYLLKYKGIDLATLPDEEFDMPLGEYTGAGAIFGVTGGVMEAAIRTGYTLITGKELKDVDINAVRGSDGFRRAEIKAGDLTLKVGVVTNLKNIDPVIEQLQAGTLDAHFVEVMTCPEGCISGGGQPKLLSDTDVP…	[FeFe] Group A4	[FeFe] Group A4	Bifurcating	Labile	6	[FeFe]-centre, 3 x [4Fe4S] clusters, 1 x [2Fe2S] cluster	NADP dehydrogenase, four FeS proteins	0.985442	0.855264	0	0	0	0.573215	0.613694	0	0	0	0.913509	0	0.644611	0	0	0	0	0	0	0	0.578419	0.140772	0	6.24286	0.928262	0	0	18.713	0	0	0	0.644305	0	10.0067	0	0	0	1.97687	0	0	0
WP_027723401.1	MARTIIPFGPQHPVLPEPLHVKLVVEDEIVQEAIPALGYVHRGLEKLAEIRDYHQMIQIVERVCGICSNIHSMCYCQGIEEIMGVEVPDRAKYLRTIWSELHRMHSHLLWLGLFADAFGFEALFMQFWRIRERIMDINEATTGSRVITSVNVVGGVRQDLTPEMCSWILSEVNTAEKEIKGLQNTILNDYTVCTRTKGVGVLTKEQAYDLGAAGPTLRGSGVASDMRLLKYAAFDKIDFEPVVENDGDCYARSTVRFRETLQSAELVRQALAGLPQGEIATKVKGNPEGEVITRVEQPRGECLYYIKGNGSKYLDRVRIRTPTFANIPPLLAMLPHCELADVPVIILSIDPCISCTER	[NiFe] Group 4e	[NiFe] Group 4e	Evolving	Sensitive	6	[NiFe]-centre, 1 x [4Fe4S] clusters	NuoL, NuoH, NuoC, [FeS] protein	0.313501	2.33588	0	1.80941	0	0	0	0	1.15221	0.913421	0	1.89811	1.28922	0	0	0	0	0	0	0	0	0.140772	0	2.08095	0	0	0	0	0	0	0.200378	0	0	0	0	0.932444	0	0	0	0	0
WP_023973103.1	MSKYMVIDGNRIEFDKEKNILDLVRKAGIDLPTLCYYTDLSVYGACRMCVVEDERGSILTSCSTPPKDMMSIRTNTPKLQKYRKVILELLLATHCRDCTICEKNGKCKLQKLASRFGLTNIRFKSIEGKKDLDTSSKSIIRDPNKCILCGDCVRMCNEIQSVGAIDFANRGSNMVVSPAFGKSLAETDCVNCGQCATVCPTGAIVVKSDIKNVWKAIYNHKQRVVAQVAPAVRVALGEEFGIKPGENVMGKIVAAMRKLGFENIYDTSLSADLTVIEESKEFLKKLESDDNKFPLFTSCCPAWVRYVENKYPELLPYVSSCKSPMEMFGSVVKAYFKEKDSLENRETISVAVMPCTAKKAEAAREEFIRDNIPDVDYVITTAELCAMIKEIGIQFDEIE…	[FeFe] Group A3	[FeFe] Group A3	Bifurcating	Labile	3	[FeFe]-centre, 2 x [4Fe4S] clusters	NADH dehydrogenase, thioredoxin	2.48833	4.16262	3.02337	2.71411	1.55125	4.0125	3.06847	0	4.03274	3.65368	1.82702	0	1.28922	0	7.45411	8.7955	0	8.40397	3.53029	1.97418	2.89209	4.36392	5.3909	0	3.09421	1.35141	7.74147	0	3.42369	0	3.00567	3.22153	0	0.526666	8.06885	1.86489	1.82551	0.988435	0.540998	2.45405	0
WP_028993715.1	MAAYETQGFKLDNSGKRVVVDPVCRIEGHLRVEVNLDSNNVIRNAVSTGTMWRGLEVILKGRDPRDAWAFTERICGVCTGTHALTSVRAVEDALNIQIPENANIIRNLMQLNLYIHDHLVHFYHLHALDWVDVVSSLKADPKKTSELAQSISSWPLSSPGYFRDIQNRLKKFVDSGQLGPFANAYWGNPAYKLPPEANLMAVAHYLEALDFQKEIVKVHTIFGGKNPHPNWLVGGVPCAINLEGAGAVGAINMERLNLVKSIIDRCTEFVEQVYIPDLLAIGSFYKGWLYGGGLSSKNLLSYGDLPLKANDYSAGNLMLPRGAIINGKLDEIHPVDLRDPEQVQEYVAHSWYKYPDENLGLHPWDGVTEPNFVLGPNTKGTKTNIKELDEGAKYSWIKA…	[NiFe] Group 1d	[NiFe] Group 1d	Aerobic Uptake	Tolerant	3	[NiFe]-centre, 1 x [4Fe3S] cluster, 1 x [3Fe4S] cluster, 1 x [4Fe4S] cluster	Cytochrome b	0.14495	0.0163189	0	1.80941	0	0	0	0	0	0	0	0	0	0	0	0	0	0.646459	0	0	0	0	0	0	0	0	1.93537	0	0	0	1.20227	0	0	0	0	0	0	0	0	0	0
WP_021724994.1	MPGTMRGVYTNLTKIRRDVFREVSKVCYQAGEDSSMTNADIDDAFDELPFKILPGDVATYRESVFLERAIIGERIRLAMGLPLQGVDRPQRISDGFNNAQIDNMSYYEPPLINIIKFACNACQDNVYEVTNMCQGCLAHPCREVCPKQAISFVDKRAHIDQDACVHCGMCERTCPYEAIHHHVRPCAAACGMGAIGSDEHGRADIDYEKCVSCGMCLVNCPFGAIADKSQIAQVIWSIQHGEEVIAAVAPSFVGQFGGKGNVGKLREAFKQLGFSGVEEVALGADLCTVQEAEDFLDEVPDKLPFMGTSCCPAWSVMAKREFPEYADTVSMALTPMTLTARMIRTQHPHAKIVFVGPCSAKKLEAMRKSVRSEVDFVLTFEEMAGMMDAREIDYLALED…	[FeFe] Group B	[FeFe] Group B	Evolving	Labile	1	[FeFe]-centre, 2 x [4Fe4S] clusters	None	2.22254	2.07772	2.4187	1.80941	7.75626	2.29286	0.613694	4.77453	2.88053	2.74026	3.65404	0	0.644611	0	2.71059	0	0	3.87876	1.76515	1.97418	1.73526	2.25235	1.34772	2.08095	2.16595	2.02711	0.967684	3.56437	2.44549	2.01625	1.40265	0	1.15221	1.58	1.34481	0	0.608504	5.93061	2.16399	7.97566	0.917866
WP_006874781.1	METTERSFDTNVQLLKYKVIKGVVEHFDKGTLESAYRDIPLAIAPGPKPTMRCCVYKERAIITERVRMAMGGDHENPNAIEVIRIACDECTVNRYHVGSACRGCIAHRCEHACPTGAISVHDGKAHIDQEKCVECGRCATACPYSAIMKYTRPCENACKIKAISMHRDNSAKIDNDKCIACGACVYQCPFGAIVDKSFVLDALTMMRDSENNAKYRVYAVVAPSISSQFSYAKTGQVVTGLKKLGFHSVVEAALGADMVAYDEAAELAEKGFLTSSCCPAFVAYVKSAFPDLANHISHNPSPMEAVARFIKRTDPTARCIFVGPCTAKKMEFQQEACTGIDCVITFEELQALFDARGVTIEHLEESVLDNASYYGRIFARSGGLSDAVAQALKEHGISE…	[FeFe] Group B	[FeFe] Group B	Evolving	Labile	1	[FeFe]-centre, 3 x [4Fe4S] clusters, 1 x [2Fe2S] cluster	None	10.0515	12.1694	15.1168	15.3799	7.75626	37.259	3.68216	1.59151	5.76106	9.13421	15.5296	3.79621	3.22306	3.01073	2.03294	0	11.4983	7.11105	10.5909	1.97418	5.20577	5.91241	8.08635	2.08095	10.5203	12.1627	3.87074	25.8417	4.89098	18.1462	3.20605	7.08736	1.15221	0.526666	5.37923	11.1893	5.47653	6.91904	5.95098	15.9513	0.917866
WP_006599253.1	MGNDGGIIALKHEVLYQVAKLAFEGKLESDRDTLPEKIIPGMIPHYRCCVYKEREIVRQRIRMAEGKAPGLEDDGNIIQVIEPACADCPISSYVVTDNCQNCLGKACLSACRFGAIHPGEKRSRIDANKCRECGMCATACPYNAIAHLVRPCKNSCPVDALTYDEMGLSVIDEEKCIRCGNCIHSCPFGAISTKSWIVDVIKAIQSDREVYVMIAPAVEGQFGKGITMTSWRKAMKELGFTDFVEVGLGGDLTTAAEAPEWYEAYQKGEKRTTSCCPGFVNMILRQYPELKDNMSTALSPMGELSRLIKSMHPDALTVFVGPCVAKKSEIIDQKIPGNADFALTFSELHALMRAKDIELTPMEEDYQRASTYGKRYADVGVADSCVQYIHEMGHDEELS…	[FeFe] Group B	[FeFe] Group B	Evolving	Labile	1	[FeFe]-centre, 3 x [4Fe4S] clusters, 1 x [2Fe2S] cluster	None	5.70542	6.02489	6.04674	2.71411	0	1.71964	3.68216	3.18302	7.48937	2.74026	3.65404	11.3886	0	6.02146	4.06588	0	7.66555	3.87876	14.1212	15.7934	15.0389	2.81543	0	0	4.64131	5.40563	3.87074	11.5842	3.42369	10.0812	2.8053	10.9532	0	27.9133	10.7585	6.5271	5.47653	3.95374	7.03298	7.36215	6.42506
WP_015359535.1	MRKFDTKVQHLKYKVLKEVARLAWNDTLLENLMDIPQMIIPGKTPTMRCCVYKERAIVAERVKLAMGGNKDNPNVIEVIEIACDECPMGGYEVTNACRGCLAHRCEDACKFGAIYFDQNHVAHIDKTKCRECGACSRVCPYSAIISLRRPCENACKIKAIHMSEAKTAAIDNKKCIACGACVYQCPFGAIMDKSYILDAIDIIKKSDNNRKYKVYAVVAPSISSQFTYAKLGQVITGLKELGFYTVIEAALGADMVAYSESRELVEKGFLISSCCPAFVSYVEKNFPGLAPSISHNLSPMATIAKYLKEREKNCKVIFIGPCTAKKAEVQKESVRPYVDVVLTFEELQALFDSKDIDITTLPEDVLDNASYYGRIFARSGGLTDAIAEGLKEHGFTDFE…	[FeFe] Group B	[FeFe] Group B	Evolving	Labile	1	[FeFe]-centre, 3 x [4Fe4S] clusters, 1 x [2Fe2S] cluster	None	21.6501	22.3895	11.4888	9.04703	35.6788	26.9411	9.20541	12.7321	28.8053	49.3247	36.5404	5.69432	15.4707	3.01073	53.5341	0	15.3311	12.2827	0	1.97418	8.67628	26.1835	82.2112	8.32381	63.4313	27.0282	12.5799	17.8219	15.1621	32.2599	3.40643	10.3089	2.30441	2.10666	5.37923	4.66222	9.12755	17.7918	5.40998	83.4377	19.2752
WP_012808500.1	MPGTMRGVYTNLTEIRRKVFKEVSTLAYEKADKSVDEIARQMEELPYKIIPGDIATYRESVFLERAIVGERIRMTMGMPMQGVDQPENISDGLEEASRPEVYYQPPLINIVKFACNACEDNVYRVTNACQGCLAHPCREICPKEAISFVDKKAYIDQEKCIQCGMCFKVCPYQAIHHHVRPCAAACGMDAIGSDEHGRADIDYEKCVSCGQCLVNCPFGAIADKSQIFQVIQAINEGYTVVPIVAPSFVGQFGKGSVGRLREAFKEMGFAEVEEVATGADLCTVQEAEDFVKEVPDKLPFMGTSCCPSWSAMAKKEYPEHADAISMALTPMVLTARLVRKQNPESKIVFIGPCTAKKLEALRRSVKSEVDFVLTFEELAGMMESKGIDYTKLDDDNSDF…	[FeFe] Group B	[FeFe] Group B	Evolving	Labile	1	[FeFe]-centre, 2 x [4Fe4S] clusters	None	3.35732	3.3423	0.604674	2.71411	4.65376	4.58572	6.75063	0	4.03274	2.74026	7.30807	0	5.8015	12.0429	3.38823	0	0	7.75751	0	3.94835	2.31368	4.64547	1.34772	2.08095	8.04494	0	2.90305	2.67328	6.84738	1.34416	2.00378	0.644305	4.60882	1.05333	0	0.932444	1.82551	7.90748	12.984	4.9081	0.917866
WP_026892187.1	MATSDATLHRITHQVLLEVAKYVWEDKIEESRNEIPYHIIPGPKAQFRCCIYREREIIRERVRLAEGLCPSGKDTTNIVQVINSACEGCPIARYVVTDNCQLCMGKACQASCNFGAITMGHDRAHIDPDKCKECGKCSQACPYNAIADLTRPCKKSCPVDAITMDENDIVVIDEKKCIQCGACVNGCPFGAIGTKTFLADVIRLIKAGKKVVAMVAPATEGQYGPDITMASWKTALKKAGFADMVEVALGGDLTAAAEAAEWAEAYEEGKKMTTSCCPAFVNMIRQHYPMLLENMSTTVSPMCAVSRMLKEKDPETVTVFIGPCIAKKSESLDLNVKDNADYVLTLGEAVALMQAKGVELEPEENTYQQASVFGKRFGNGGGVTAAVLECLKETEKNTD…	[FeFe] Group B	[FeFe] Group B	Evolving	Labile	1	[FeFe]-centre, 3 x [4Fe4S] clusters, 1 x [2Fe2S] cluster	None	5.45707	6.25408	6.04674	3.61881	9.30752	1.14643	9.20541	12.7321	2.88053	1.82684	1.82702	0	18.6937	15.0536	8.80941	1.88475	7.66555	5.17167	5.29544	1.97418	3.47051	16.8926	6.73862	6.24286	0.309421	6.08133	4.83842	0.891093	2.93459	4.70457	4.00756	0.644305	2.30441	0.526666	8.06885	8.39199	1.21701	2.9653	3.24599	7.97566	2.7536
WP_009141594.1	MSNSMRGVYTSLAQIRRTVFREVARLAYESQSGDYGWVDELPYEIIPGDVATYRESVFLERAIVGERIRLAMGLPLQGVDKPAKLSEGVAEAAKPETYYQPPLINVIKFACNACEENSYKVSDACQGCLAHPCREICPKGAITFKDKKAYIDQEKCIKCGRCANVCPYGAIQHHARPCAVACGMNAISSDEQGRAQIDYSKCVSCGQCLVNCPFGAIADKSQIFQVIQAILAGEEVIAEVAPAFVGQFGGKGNVDKLREAFKALGFTGMEEVALGADLCAVQEAEDFLEEVPDKIPFMGTSCCPAWSVMAKMEFPEHADCVSMALTPMTLTARLIRKQHPNAKIVFVGPCSAKKLEAQRKSVKSEVDFVLTFEEMAGMMEAKDIDYTRLAGEGSSDFEV…	[FeFe] Group B	[FeFe] Group B	Evolving	Labile	1	[FeFe]-centre, 2 x [4Fe4S] clusters	None	6.77887	9.27831	1.81402	3.61881	1.55125	2.29286	2.45477	14.3236	13.2504	1.82684	3.65404	7.59242	9.02456	0	7.45411	0	3.83277	2.58584	26.4772	0	1.15684	2.95621	4.04317	6.24286	8.9732	5.40563	0.967684	0.891093	17.1184	4.70457	2.20416	3.22153	49.5448	2.63333	2.68962	7.45955	3.04252	21.7456	44.9029	11.6567	3.67147
WP_008907580.1	MELVKLTIDGFEVEVPKGTTVLEAARKIGIEIPTLCYLKDVNKFGACRVCVVEVGPRLLASCTLEAENGMVVKTNTQKVREARKAVVELILSNHKRECTTCIRSENCELQKVSKELNIRDLRFEGEKTHEDIDSASASVVRDPEKCILCGRCIATCSEVQTVYAINFARRGFKTKVSPAFNKSLADTVCINCGQCIMACPVGALHEKENIKEVWMAISNPEKFVVVQTAPAVRVALGEEFGMPIGTRVTGKMVAALRRLGFDKVFDTDFGADLTIMEEGTELLNRLNKGERLPLMTSCCPGWVKFVEHYYPEMTENLSTCKSPSEMEGALIKTYFAEKMGIDPKNIVTVSIMPCVGKKFEGQREELSHNGLQDVDYVLTTRELAQMIKEAGIDFVNLPD…	[FeFe] Group A3	[FeFe] Group A3	Bifurcating	Labile	4	[FeFe]-centre, 3 x [4Fe4S] clusters, 1 x [2Fe2S] cluster	NADH dehydrogenase, thioredoxin, thioredoxin	3.53071	4.16157	3.62804	0.904703	7.75626	4.58572	4.29586	6.36604	2.30442	6.39394	7.30807	3.79621	0.644611	0	4.06588	0.62825	0	9.05043	3.53029	0	1.15684	1.40772	2.69545	0	4.95073	4.05422	1.93537	2.67328	7.82557	2.68833	1.20227	3.22153	4.60882	5.26666	5.37923	2.79733	6.69354	0	1.082	4.29459	4.58933
WP_027202827.1	MQLRPIYTEPDNCQDCYKCIRECPVKAIRMENNQASIIEDRCIYCGHCTQVCPTGAKKIRDGLTRAKLTLTQNPKVILSLAPSYVSEFEGVHSSVLIAAIKRLGFTSVSETALGAEIVTDRTEKFLEEAESGVYISSACPVVVEYIRKYSPDHVRFITPIISPMLAHAKILNQLYGEDVKIVFAGPCICKKLEADYFNNLVDVVITFKDLKKWFEQSDINLKNIAPNQPEARFVPYRSGMGAYYPIEGGMLKGMQEGKKQIHHMAFSELSTVKDVLKELDSHREDDSIFLELLACKGGCINGPAKLSHISPALKRYEIIHQSELGNPKDDFKNIDLQILFCKDPHVQDHTYTEEEIKQAMAVVGKTGPEDELNCSGCGYDSCRDFAIAMLEGRAEENMC…	[FeFe] Group C	[FeFe] Group C3	Sensory	Labile	3	[FeFe]-centre, 2 x [4Fe4S] clusters, PAS domain	Phosphatase, thioredoxin	2.13792	2.01721	0	0	0	1.71964	1.84108	1.59151	4.60884	3.65368	0.913509	11.3886	0.644611	0	0	0	0	0.646459	0	0	0	4.64547	1.34772	0	0.618842	0	0	0	0	2.68833	0.400756	0	0	0	4.03442	0	0	2.9653	2.16399	3.68107	0
WP_017890116.1	MSVISTIRTSCRDCYKCIRHCPVKAIRISLGHAEVVDERCIKDGRCVLVCPQGAKKVRSDLEEAKKLIASGGTVIASVAPSFVAAFPEATPGQVIRGLRMLGFSEVRETAEGAEWVAREHALLLQEGRENLITSSCPAVNFLITRYFPEHIEYLAPVVSPMVAHGRLLKREFPGASIVFIGPCIAKKAEAEEEEVRGDVDVVLTFSELREWFKEAHLELTALPEDRFSPGKVRFARAFPVEGGLIKSAALQGELLCRDILTITGVDRCKEFLKSFSPERSRFRIIEMMSCEGGCIDGPVLSSPLSPYERRERVLEYTEKFLKECEEPIVCLDPPSFRRTFSPSPVPRPEVPEEEIRRILALTGKFTPQDELNCGACGYNTCREKAEAVYQGMAEAEMCI…	[FeFe] Group C	[FeFe] Group C3	Sensory	Labile	2	[FeFe]-centre, 2 x [4Fe4S] clusters, PAS domain	Phosphatase	0.322434	0.224177	0	0	0	0	0	0	0	0.913421	3.65404	0	0	0	0.677647	0	0	0	0	0	0	0.140772	0	0	1.23768	0	0	0	0.489098	4.03249	0	0.644305	0	0	0	0.932444	0	0	0	0	0
WP_025801577.1	MNQQKTGQHYIQELRQQFPSAILDESWQTDTQATITIKTNMLPEVVEFLYYKQGGWLSVLFGNDERPLCGSYAVYYVLSMETGTKCWITVKALVDERTLEFPSVTPRVPAAVWGEREVRDMYGLIPVGLPDERRLVLPDDWPDELYPLRKDSMDYRQRPAPTTDVETYPFINESKSGKIVPIGPLHITSDEPGHFRLFVDGEDIVDADYRLFYVHRGMEKLAETRMGYNEVTFLSDRVCGICGFAHSTAYTSSVENAMGIQVPERAQAIRSILLEVERLHSHLLNLGLSCHFVGFDSGFMQFFRVREKSMKMAEILTGARKTYGLNLIGGIRRDLLKDDMIQTRKLAAEMRAEVKTLVDILFSTPNMEQRTVGVGRLDPQIARDFSNVGPMIRASGHAR…	[NiFe] Group 4a	[NiFe] Group 4a	Evolving	Sensitive	6 or 9	[NiFe]-centre, 1 x [4Fe4S] clusters	NuoL, NuoH, two [FeS] proteins, (three antiporter subunits)	0.207153	0.0155208	0.604674	0	0	0	0	0	0	0	0	0	0	0	0	1.88475	0	0	0	5.92253	0	0	0	0	0	0	0	0	0	0	0	0	0	0	0	0	0	0	0	0	0
WP_016147589.1	MVNVTINGITVSVPEGTTIKAAAAQAGIVIPTLCYLKDLNEIGACRVCCVEVEGERRMVTACNNPVREGMVVHTNSPRARETRRVNVELILSQHDCHCATCVRSGNCKLQELANDLGILVNPYEEDLPHGIHAMWTTTFPLYRDAKKCIKCMRCVQVCEKMQSLGIWELTGSGGRSTIDVSYNRRIKDADCALCGQCITHCPVGALRERDDVQRALDALADPDIVTVVQIAPAVRAAWGEAFGLAPEQATVARLTAALRRMGFDYIFDTTFSADLTIMEESAEFLERLKSGALRNGPMFTSCCPGWVRFLKSQYPDMTALLSSAKSPQQMFGATAKTWFAKKIGVDPKKLFCISIMPCLAKKSECDLSTMQNEDYGKDVDLVLTTREVDRMLRADQINV…	[FeFe] Group A2	[FeFe] Group A2	Evolving	Labile	2	[FeFe]-centre, 3 x [4Fe4S] clusters, 1 x [2Fe2S] cluster	NADH-dependent glutamate synthase	10.3875	10.6459	9.67478	10.8564	10.8588	8.59822	5.52324	14.3236	8.64158	9.13421	13.7026	13.2867	39.3213	9.03219	5.42117	2.513	19.1639	13.5756	12.356	1.97418	6.36261	14.4995	17.5204	2.08095	12.6863	14.1898	7.74147	3.56437	8.80377	4.70457	11.4216	10.3089	9.21764	3.68666	9.41366	9.32444	4.25952	21.7456	4.32799	23.3135	10.0965
WP_031366038.1	MKEVTIKINGKTYTAPEGTTILEAARLNNIDIPTLCFLKEINEIGACRICLTEVEGMNNLVTSCVYPITEGMSIKTNSDRVFKSRKTNLELILSTHERKCLSCIRNGNCELQKLCKAFNVDDEDYYNGENCEYEFDDSSVHMYRNNNKCILCRRCVAVCKKIQSVGVIGANDRGFNTHIGSAYEQDLGDVDCISCGQCIVVCPTGAIAEKDQTQEVWEALQDPTKHVVVQTAPSVRVTLGEAFQLPVGTNVEGKMVAALRRIGFDRVFDTNVAADFTIMEEATEFLQRVENNGPFPMFTSCSPGWVKYCEAYHPELIPNLSSCKSPQQMFGALIKTWYAQKNNIDPEDIFVVGIMPCTAKKFEVTRENQAAAGYTDVDIALTTRELARMIEKVGIRFNE…	[FeFe] Group A3	[FeFe] Group A3	Bifurcating	Labile	3	[FeFe]-centre, 3 x [4Fe4S] clusters, 1 x [2Fe2S] cluster	NADH dehydrogenase, thioredoxin	1.19358	1.10374	0	0.904703	0	1.71964	2.45477	0	1.15221	3.65368	0.913509	0	0.644611	0	1.35529	0	0	1.29292	0	0	2.31368	0.281543	1.34772	0	1.23768	2.02711	0	0.891093	0.489098	1.34416	0.400756	0	0	0	1.34481	2.79733	0	0	0.540998	3.06756	0
WP_015739748.1	MADVCLTIDGFSVTVPEGTTILKAARQVGVKIPTLCYLEGINEVGACRICVVEVEGREELVTSCNTPVEEGMVVRTNTPAVREARRMTLELILANHPMECPTCPRNGNCELQNLAQQLNIRTVRIPALPRKELPLDTSTVAIIRDPNKCIVCRRCESVCHNIQTVGAIALQGKGFAATVAPVGGRYLDETNCVQCGQCALVCPVGAIYERDDTDKVWAALADPTKHVVVQTAPAVHVTIGEMFGLPVGTDATGKIVAALRRLGFDAVFDTNFAADLTIMEEGTELLERIEKGGVLPQFTSCSPGWIKFIEHFYPELLPHVSTCKSPQQMFGAIVKTYYAQLKGINPANIVSVSIMPCTAKKFEAARPEMNASGYRDVDVVLTSRELGRMIKEAGIDFAN…	[FeFe] Group A3	[FeFe] Group A3	Bifurcating	Labile	3	[FeFe]-centre, 3 x [4Fe4S] clusters, 1 x [2Fe2S] cluster	NADH dehydrogenase, thioredoxin	0.905746	0.748387	0.604674	0	1.55125	1.71964	1.22739	1.59151	1.15221	3.65368	0	0	0	0	0.677647	0.62825	0	1.93938	1.76515	0	0	0.140772	0	0	1.85652	1.35141	0	1.78219	0.978197	1.34416	0.400756	1.28861	1.15221	0	0	0	1.82551	2.9653	1.082	0	1.83573
WP_018338305.1	MQLRPIYTEPDNCQDCYKCIRECPVKAIRMEDNKASIIEDRCIYCGHCTQVCPTGAKKIRDGLTRAKLTLTQNPKVLLSLAPSYVSEFEGIHSSVLIAAIKKLGFTDVSETALGAEIVSDRTEKFLEEADNGVYISSACPVVVEYIRKYSPEHVHNITPIISPMLAHAKILKQLYGEDIKIVFAGPCICKKLEADTFNNLVDVVITFKDLKKWFEQAEINLHQIAPGQPDAHFIPYRSGMGAYYPIEGGMLKGLHEPKKQVHNMAFSELSTVKDVLKSLDTRRENDSIFLELLACKGGCINGPAKLSHISPALKRYEIIHQSELGNPKDDFKYIDLQILFCKDPHIQDHVYTEEEIKQAMAVVGKTGPEDELNCSGCGYDTCRDFAIAMLEGRAEENMC…	[FeFe] Group C	[FeFe] Group C3	Sensory	Labile	3	[FeFe]-centre, 2 x [4Fe4S] clusters, PAS domain	Phosphatase, thioredoxin	0.72713	0.555748	0	0	3.10251	0	1.22739	0	3.45663	0.913421	0	1.89811	0	0	0.677647	0	3.83277	0	0	0	0	0.84463	0	0	1.85652	0	0	0	0	0.672082	0.200378	0	0	0	8.06885	0	0	0	0.540998	0.613512	0
WP_018249206.1	MDTITLTIDGQQVEVNQEATVLEAARKLGIEIPTLCYHPDLSLHGSCRVCVVEDEKSGRLLASCVAPVNDGMEISTNSSKARRARKTNVELLLANHPNDCLGCDRNGSCELQDITHDLGITKVSFEGEKRDLPVDASGPSLKREPNKCILCGRCVRVCEEVQGVSALEFTERGFNSIVSTGFDLPQSEVNCANCGQCATVCPTAAITEISEIDKVWAALEDDSKHVVVQTAPSIQSTMGEEFGIKAGTIVTGKLAASLRRLGFDRVFSTDFAADLTIMEEGNEFIQRFKGNKQLPHITSCCPGWVKFCEHNYHDLMDNLSSAKSPMSMFSAISKSYYAEQTDIDPESIYTVAIMPCTAKKFEKDREELVGDTDAVLTTRELARMIKEMGIQFATLENEE…	[FeFe] Group A3	[FeFe] Group A3	Bifurcating	Labile	4	[FeFe]-centre, 3 x [4Fe4S] clusters, 1 x [2Fe2S] cluster	NADH dehydrogenase, thioredoxin, thioredoxin	0.233218	0.0628257	0	0.904703	0	0	0	0	0	0.913421	0	0	0	0	0	0	0	0	1.76515	0	0.578419	0.422315	2.69545	2.08095	0	0	0	0	0	0	0	1.93292	0	0	0	0	0	0	0	0	0
WP_012635578.1	MSDKVNITLDGKSLTVDKDKTILEVAREAGIKIPTLCYLEEINEIGSCRVCVVEVNGKIQPACVTPVSEGLEITTTSPRIREARRISLELIISDHPMECLTCSRNGNCELQRLAEDFGISEITYEGEQSHFEPDLSSPSIVRDPDKCILCRRCVSVCEQVQGVAALTPNERGFSTIITPAFGQKLGEIACANCGQCINACPVGALSEKDDTEKVWEALANPDKHVVVQTAPAVRVSIGEVFGMKPGSLVTGKLMAGLRRLGFDKVFDTNFTADLTIMEEGHELIERLKNNERLPLITSCSPGWIKFIEHFYPSYLEHISSCKSPQQMFGALAKTYYPENNGIDPEDVFVVSVMPCTAKKFEITRPGMDSSGYQDVDVVLTTRELAKMFKQAGIDFVNLP…	[FeFe] Group A3	[FeFe] Group A3	Bifurcating	Labile	3	[FeFe]-centre, 3 x [4Fe4S] clusters, 1 x [2Fe2S] cluster	NADH dehydrogenase, thioredoxin	0.555786	0.459623	0	0.904703	1.55125	0	1.22739	1.59151	0	0	0	0	0	0	1.35529	0	0	0	0	0	0	0.422315	2.69545	0	0.309421	0.675704	0	0	0.489098	0.672082	0	0	3.45662	0	0	0.932444	0	0	4.32799	0.613512	0
WP_010251391.1	MDNNIIISKEEKCVGCNKCIYVCPVEGANISYIKDGKSYTKIDESKCITCGSCINACDHQARSYQDDLESFLNDLKNGEKISILAGPAFKISFPNYQQILGFLKSLGVINFYDVSIGADITTWAYLRAIKDRNLKSVVAQPCPAVVNYVQKYRHEILPYLSPIHSPMMCTAIYLNKYLKVNDKLGFLSPCIAKKSEMQDPNTNKLVKYNITFKNLFDYIKSKGIDLSSFSKWDFAVHSYLAGDIYSMPGGLKENVCLYTKDAFIKQVEGPQQAYKYLDEYAQRCTSGNTLPLLVDILNCQNGCNIGTGTIKENSITELEEKVHSLKTNKSSKFNKNPQNLFKYFNKELKLEDFTRNYSKEDIGLPKEPSEADYNNIFSKMLKTTYEDKNKNCFSCGYGN…	[FeFe] Group C	[FeFe] Group C2	Sensory	Labile	1	[FeFe]-centre, 2 x [4Fe4S] clusters, PAS domain	Fusion with methyl-accepting chemotaxis protein	121.288	138.882	68.3281	70.5668	80.6651	17.7697	44.7996	49.3368	97.3618	34.71	78.5618	121.479	30.9413	27.0966	138.918	255.07	130.314	125.413	197.696	294.152	264.916	170.897	51.2135	189.367	56.9334	79.0574	130.637	33.8615	20.5421	207.001	87.966	60.5647	57.6103	163.266	277.03	303.977	55.3738	41.5143	30.8369	31.2891	82.608
WP_012625129.1	MPRIIMEHIQYEPHVPPRGADGDKMLFVQIDDKKCIGCDLCQEYCPTGAVYGETGLAHTVAYPEPCINCGQCLTHCPEMAIYETQTWVPELQEKLKDKNVKCIAMPAPAVRYALGEAFGLPPGTVTTGKMLAALKALGFDHCWDTEFAADVTIWEEASEFVQRLGEKKHLPQFTSCCPGWQKYAETFYPDLLPYFSSCKSPVGMNGRLSKTYGAEKQGYDPAQVYTVSIMPCIAKKYEGLRPEMAAGGQRDIDATLTTRELAYLIRQAGIDFARLPEGQRDSLMGESTGGATIFGVSGGVMEAALRYAYEAVTGQRPDSWDFKEVRGLKGVKEYAVTINGTELRLAVVHGAKHFAAVCDQVRAGNSPYHFIEFMACPGGCVCGGGQPIMPNLLEYAERK…	[FeFe] Group A1	[FeFe] Group A1	Evolving	Labile	2	[FeFe]-centre, 2 x [4Fe4S] clusters	Small subunit	0.256694	0.0943712	0	0	1.55125	0	0.613694	0	0	0	0	0	0	0	0	0	0	0	0	0	0	0	5.3909	0	0	0	0	0	0	0	0	0	0	0	0	0	0	0	0.540998	0	0
WP_013626003.1	MSNVTLKIDGIEVSVPKDYTILQAARQANIEIPTLCYLQGLNEPASCRICVVEVEGWRGLQPACVTKVVEGIVVKTASKVVRETRKGILELILANHNRECLSCTRNQNCELQKMSEEMGVGEVYYQKKAARAAMDKTGPVVRDTSKCVLCGRCVSVCSSVQNVDAIDFAHRGPQTSVTTPYEEKLTARNCINCGQCIKVCPVGALSERDDTDLVWAALENSELNVVVQTAPAVRIALGEEFGLPVGTDVEGKMVTALKKLGFDKVFDTNFSADLTIMEEGTELISRINNGGKLPLITSCSPGWIKFCEHKYPDFLDNLSSCKSPQQMFGAVAKSYYPEKAGIDPKKVFVVSVMPCTAKKYEADREELVVDELKDIDVAITTRELAKMIKQAGIQFTDLA…	[FeFe] Group A3	[FeFe] Group A3	Bifurcating	Labile	4	[FeFe]-centre, 3 x [4Fe4S] clusters, 1 x [2Fe2S] cluster	NADH dehydrogenase, thioredoxin, thioredoxin	0.536409	0.480191	0	0	0	1.14643	3.06847	0	0	1.82684	0	0	2.57845	0	0.677647	0	0	0	0	0	0	0.563087	0	0	1.5471	0	0.967684	0.891093	0.489098	0	0	0	1.15221	0	1.34481	0	0	2.9653	0.540998	0.613512	1.83573
WP_027199847.1	MNENITLKIDNREISVPKGTTILEAARELGIDIPTLCYMNLKDLCIKNAPASCRICVVEVDGRKNLAPSCATRCENGMNVHTNTMRVLNARRTVLELMLSDHPSDCLVCAKSGSCELQAVAIKLGIREIPFQGTQTEYKVDLSPSIRRDATKCIYCRRCEMMCNDIQTVGALGAVNRGFDSVVMPAFDQALQDSECTFCGQCVAVCPVGALTELDHTNRLIKDLANPDKTVIVQTAPAVRAALGEEFGLPAGTSVTGKMVAALRKLGFAKVFDTDFAADLTIMEEGTELLGRLTAFLNGDKDVKLPIITSCCPGWVNFFEKQFPDLLDNPSSARSPQQMFGAIAKTYWAEKMGIKREDLIVVSVMPCLAKKFESERDEFRTNGDPDVNYSISTRELAAL…	[FeFe] Group A3	[FeFe] Group A3	Bifurcating	Labile	3	[FeFe]-centre, 3 x [4Fe4S] clusters, 1 x [2Fe2S] cluster	NADH dehydrogenase, thioredoxin	1.34437	1.24143	1.20935	0	1.55125	2.29286	0	0	0	1.82684	0	1.89811	1.93383	0	2.03294	0	0	0.646459	0	0	0	6.19396	1.34772	0	0.618842	0	0	0	0.978197	0	0	0.644305	0	0	0	0	0	1.97687	0	1.84054	0
WP_011641809.1	MVTIKVNGFETSVPEGSTVMQAAAAAGFMIPSLCSHPDLQVKDNCKVCVVDVNGEIKTACSEVVAPGMEVKTNTPRVIAEKRNNLKKILKVHPQDCLNCARNQNCELQTLAGTLIIRSFEHKPLKLPQDRSTPSIVRDPSKCTLCLRCVEMCNDVQTVGALEIKNGVPQTIDGKALIETKCVMCGQCALVCPVGAIIENEEVEEFLAAVADPEKIVITQIAPAVRVAVAEELGITTGALDMLNFVAGLRQLGFDYVFHTNFTADLTILEEGNELLKRLKEGGTLPMLTSCSPGWINFIETFYPDQLDHLSTCKSPQQMFGALAKTYWAEKMGIDPAKIYSVSIMPCTAKKFEAQRPEMNASGFRDVDLVLTTREVGKLFRMGGAYWDKLEPSNFDSLLG…	[FeFe] Group A1	[FeFe] Group A1	Evolving	Labile	1	[FeFe]-centre, 3 x [4Fe4S] clusters, 1 x [2Fe2S] cluster	None	0.779098	0.68741	0	1.80941	1.55125	0.573215	0	0	0.576106	3.65368	0.913509	0	0	0	0.677647	0	0	0	0	1.97418	0	0	0	0	0.928262	0.675704	0	3.56437	0	1.34416	0.200378	4.51014	0	3.15999	0	0.932444	2.43401	0.988435	0.540998	0.613512	0
WP_005026843.1	MAYEYTTQGYTVNDSGRRLVVDPVTRIEGHLRCEVNINDDNVITNAVSCGTMFRGLEIIVKDRDPRDIWAFVERICGVCTGTHALASVQAIEDALKIDIPDNANIIRNLMQLALWYHDHLVHFYQLGGLDWIDVVSASKADPKETSRLAQSLSPWPQSSPGYFASVKEKLVRIISTGQLGIFKNGYWGHPGYKFPPEANLMLVAHYIEALDFQKDVVQIHTVFGGKNPHPNWLVGGVPLALNINGKGGADVINMERLELVLSIIKRCREFSAQVLVPDSIALAKFYPEWLHLGTGLSNQSLLAYGAFPSIANDYSQKSLLIPGGAIINGNFNEVLPVDLSDEDQIREEVGRSWYTYPKGVTSLHPYQGETVPHFELGPATKGSRTDIKQLDENAPYSWI…	[NiFe] Group 1d	[NiFe] Group 1d	Aerobic Uptake	Tolerant	3	[NiFe]-centre, 1 x [4Fe3S] cluster, 1 x [3Fe4S] cluster, 1 x [4Fe4S] cluster	Cytochrome b	0.329317	0.354791	0	0.904703	1.55125	0	0	0	0.576106	3.65368	0	0	1.28922	0	0	0	0	0	0	0	0	0.140772	0	0	0	2.02711	0	0	0	0	0.801513	0	0	0	0	0	0	0	0	0	0
WP_002570587.1	MRGVETRIQEIRHRIFREVARMAYHTEWPVDKRIEELPYKIIPGEVGNFRNDVFLERAIVGERLRLAMGLPYRSAAEHAPVSDNIEAADRPETYYTPPLINVIKFACNACHEKRVFVTDGCQGCLAHPCEEVCPKDAIKLDRTNGRSHINDDKCIKCGRCADVCSYKAIIIQERPCAAACGMDAISTDENGKADIDYDKCVSCGMCLVNCPFGAIADKSQIFQVIRAIQSGERVYAAVAPAFVGQFGPKVTPGKLRAAMKALGFADVFEVAVGADLCATQEAIDFIQEVPEKLPFMATSCCPAWSMMAKKLFPEHADCISMALTPMTLTARLIKRHHSNAKVVFIGPCAAKKLEAMRTDIRSDVDFVLTFEEMDGIFDARHVDVEKIEEDPEGVNDASM…	[FeFe] Group B	[FeFe] Group B	Evolving	Labile	1	[FeFe]-centre, 2 x [4Fe4S] clusters	None	4.53552	4.64914	2.4187	4.52351	1.55125	6.30536	1.84108	6.36604	1.15221	1.82684	3.65404	3.79621	5.8015	12.0429	2.71059	2.513	0	12.2827	3.53029	1.97418	8.09786	3.80084	0	4.16191	5.879	2.02711	6.77379	5.34656	1.95639	3.36041	3.60681	6.44305	0	7.37332	2.68962	5.59466	9.12755	1.97687	5.95098	4.9081	5.5072
WP_005944276.1	MSFRGINTTVIQIRRQVFTEVARMAYANVKGEQANHLMRKIPYTIIPGEEGKLRKDIFLERAIVEERVRLAMGLPTRRMDEHNSVVSGLEDASIADKYYDPPLVNVIKFACNRCPEKLVKVSDLCQGCLAHPCMEVCPKKAITWESGRSIIDQDKCIKCGRCVGVCPYNAIVKTERPCAAACGMGAIHSDELGRAEIDYSKCVSCGQCLVNCPFGAIADKGQIYQLIQGFNRGDRIYALVAPAFINQFPGLASTGKLKAALKAVGFYDVVEVAIGADLCTVDEAHDFLEEVPGKLNFMATSCCPAWSMMAKTAFPDLAKNISMTMTPMVFTARMMKQKDPEARMCFIGPCAAKKLEASRRTVRSDVDFVLTFEELAGIIEAKDVDTSLLEVDEAEALHA…	[FeFe] Group B	[FeFe] Group B	Evolving	Labile	1	[FeFe]-centre, 2 x [4Fe4S] clusters	None	286.576	312.797	346.478	294.933	252.854	68.2126	284.14	208.488	131.352	64.8529	387.328	299.901	251.398	773.757	227.012	501.972	325.786	196.524	859.626	724.522	451.167	396.554	250.677	228.905	86.9472	240.551	371.591	47.2279	292.481	299.077	422.598	42.5241	577.255	18.4333	361.753	324.49	172.815	126.52	234.793	14.1108	367.147
WP_014186009.1	MLDGIVYTDMEQCQACSACLRVCRTKSIMMKEGKSKIIEESCLNCGACLKACSRGAKKYQSGLEAVEELLAKDKSAIILAPSYVIVAQKRYGCSPEQFGTALRKLGFALVYEASFGADVVTKVYLNYLWDFLNTQGREKTHVITSPCPSLMNFMEKHAPSLLDEFAPIMSPMAAQAVLVKQWNQGQVRIVGASPCMAKKSELLDPELGLYDQKLTFEELIQLLDRRGIVPACLEETEFDGIQALYGAGFPISGGLTKALEPFSGELGFNLLSNDYLIIEGEDRSTNFLKQMARHKQGSGGLAGYPLLIDILFCEGCIMGKSLGVEGDYWENKRLITDYTKKRFQKLQENSQECQGYITLVKNTVEVPEFQRWLAIVEELIADNQFTRPWQSREYHRKEP…	[FeFe] Group C	[FeFe] Group C3	Sensory	Labile	1	[FeFe]-centre, 2 x [4Fe4S] clusters, PAS domain	Histidine kinase	0.782607	0.655903	0	0	0	1.71964	1.22739	1.59151	0.576106	0.913421	1.82702	0	1.93383	6.02146	2.03294	0	3.83277	1.29292	0	0	0	0.281543	6.73862	0	0.309421	0	0	0	0.978197	0	0.200378	0	0	0	0	0.932444	0	0	0.540998	0.613512	0.917866
WP_027357333.1	MWINDQPAEVPEGMNLLEICRSRGIEIPSLCYLPGIHEAGICRVCLVEVEANGRRSLQASCVYPASEGIKVYTHSPRARRARKRVVELLLSEHGGECPTCVRNLNCELQRLADEMGIRRVRVTGERRRYPVANKNPFIIRDYNKCVRCRRCEAVCREVQGVGVLGPRNRGFDLVIGPPFGKDLGEVDCISCGQCVMVCPTGALTEREYIDEVWRAIEDPDKFVVVQVAPAIQVTLGEAFGLGTGTIVRGKLAAALRRLGFDRVFTTELAADLTIVEEAHELLERLKGHGKLPLISSCSPGWVKFCEHFYPEFVDNLSTCKSPMEMFGALAKTYYAEKEGLDPKKMVVVGVMPCTAKKFEAARPELVTRGLRDVDYVLTTRELARMIRQAGIRFDELPDE…	[FeFe] Group A3	[FeFe] Group A3	Bifurcating	Labile	3	[FeFe]-centre, 3 x [4Fe4S] clusters, 1 x [2Fe2S] cluster	NADH dehydrogenase, thioredoxin	0.128221	0.0558593	0	0	0	1.71964	0	0	0	0	0	0	0	0	0	0	0	0.646459	0	0	0	0	0	0	0	0	0	0	0	0	0	0	0	0	0	0	0	0	0	0	0
WP_013823363.1	MQQYFHSVRLDEEKCKGCTNCIKHCPTEAIRVRKGRARIIEERCIDCGECIRICPNQAKLAITDCLEKLKDFKYTVALPAPSFYGQFKPEVTPSQVLSALLALGFHDVFEVALAAEAVSWAIRHYMEVCVDRPRPLISSACPAVVRLIQVRFPSLLEHIIPIESPMEIAGRMAREQACRKTGLEPGEIGTFFITPCPAKVTEVKQPSEGRSSVDGAISMAVVYGALLKRLEMPAPYPVAPRASGVGIGWGRAGGENEAIKAGSLLAVDGIHSVISVLEEIERGGLTDIDYLEAQACTGGCIGGPLVPQNPFVARVRMGNLVKLYPAGEPWDFPRDFDYYRLKTPIPARPALTLAKDPQVALARLEEAERICAELPGLDCGSCGSPSCRALAEDIVQGYA…	[FeFe] Group C	[FeFe] Group C1	Sensory	Labile	2	[FeFe]-centre, 2 x [4Fe4S] clusters, PAS domain	Histidine kinase	0.258633	0.157607	0.604674	0	0	2.29286	0	0	0	0	0	0	0	0	0	0	0	0	0	0	0	0	0	0	0	0	0	0	0.489098	0	0	0	0	0	0	1.86489	0	0.988435	0	0.613512	0
WP_027308223.1	MGYTIPIGPYHPSLEEPIHAKLYTEGEVIKDAEVFIGYNHRGIEKLATERNFIQTLTLVERVCGICSHSHPFAYAMAIENIAQMEVPKRGQYIRVIMAELERLHSHYLWIGLACHLIGYDSLFMYVWNARERIMDILEEISGNRVNYGMVIIGGSRRDIDDEKRKKILNMLDDLIEPHNRMKDIFLNDKTAALRTKGVGVLPKDVAERMGTIGPHARASGVNVDVRKDAPYSCYDEFDFNVPVLNEGDVWARVVVRVLEIEESIKIIKQALENLPEGPINLGNKLPKVPAGEFTARHEAPRGQVVYYVVTDGGQTNYRISIHVPTFKTAPTVPYMLKNNTIADAGLIIASIDPCFSCLDR	[NiFe] Group 4d	[NiFe] Group 4g	Evolving	Sensitive	6	[NiFe]-centre, 1 x [4Fe4S] clusters	NuoL, NuoH, NuoC, [FeS] protein	0.24925	0.100355	0	0.904703	0	0	0	0	0	1.82684	0.913509	0	0	0	0	0	0	0	0	0	0	0.281543	0	0	0	1.35141	0	1.78219	0	0	0	0	0	0	0	0	0	3.95374	0	0	0
WP_013297601.1	MYFHSVTLDKDRCKGCTNCIKRCPTEAIRVRDGKAKIIKEKCIDCGECVRVCPYHAKIVVTDDTEMMKNYKYKIALPAPSLYGQFKDMTIGDILASLKSCGFDEVFEVAYAADIVSYITRTIVKIKNFKRPIISSACPAIVRLIQQRFPSLIDNILDIMPPVEVAGKIAKDEAKKKTGLNDEEIGVFFISPCAAKVTSVKNPIGIKKSYIDGVFSMHDIYSMILDNRRSRDKSVEHASSMIGVGWANAGGESYGTSLENCLFVDGIQNVINVLEEIELGKLNDIDFFEGLACIGGCVGGPLTVENNFVARNRIMKIKEKLNKEANIKKHLVADYREFMLNVELKKSDVLNLDDDIDKAIDKMKSIDEIYKNLPGLDCGSCGSPGCRALAEDIVKGYASE…	[FeFe] Group C	[FeFe] Group C1	Sensory	Labile	2	[FeFe]-centre, 2 x [4Fe4S] clusters, PAS domain	Histidine kinase	0.700931	0.559424	1.20935	0.904703	3.10251	2.86607	1.84108	0	0	1.82684	0	0	1.93383	0	1.35529	0	0	0.646459	0	0	0	0.140772	5.3909	0	0	0	1.93537	1.78219	0	0	0	0.644305	0	0	0	0.932444	0	0.988435	0	0.613512	0
WP_008025884.1	MAFTNNIMIVRHKLLADLVKLWKNDELVEKIDRLPIELSPRKSKPLGRCCVHKERAVWRYKTFPLMGLDMTDEHDEVTPLSEYARLALSRPEPDKENIMCVIDEACSSCVQINYEITNLCRGCVARSCYMNCPKDAIRFKKNGQAMIDHDTCVSCGICHKSCPYHAIVYIPVPCEEACPVKAISKDEHGIEHIDESKCIYCGKCMNACPFGAIFEISQTFDVLQRIRKGEKMVAIIAPSILGQFKTSIGQVYGAFKEIGFTDVIEVAEGAMATTSNEAHELLEKLEEGQKFMTTSCCPSYIELVEKHIPDMKPYVSTTGSPMYYAARIAKKKHPDAKVVFVGPCVAKRKEVRRDEAVDYILTFEEIGSILDGLGIELEQVQEFSVLHTSVREAHGFAQA…	[FeFe] Group B	[FeFe] Group B	Evolving	Labile	1	[FeFe]-centre, 3 x [4Fe4S] clusters, 1 x [2Fe2S] cluster	None	2.54532	4.22813	9.07011	2.71411	3.10251	1.14643	0	0	0	2.74026	0	0	0	6.02146	0	0	38.3277	1.29292	3.53029	11.8451	1.73526	4.08238	0	0	7.11668	0	0.967684	0	0	0.672082	0	0	1.15221	0	0	1.86489	0.608504	0	1.082	0	0.917866
WP_013778939.1	MDMVTLTIDGIKVQAPKDATVLEAARKAGIRIPTLCFLKGVNEIGACRMCVVEVKGAKSLQTACVLPVSDGMEVITNSAAVRESRKVTLELLLSDHNLECPTCIRNLNCELQKLSEELGVQAIRYPGEKSKAQYDDFSPSIVRDTSKCILCRRCVSTCHKVQGVGVISPNYRGFNTVIAPVYDMSLSEVSCVNCGQCIMACPVGALKEKDDTDKVWKALADPEKYVIVQTAPAIRVSLGEEFGGELGTIVTKKLPAALRRLGFDKVFDTDFSADLTILEEGSEFLDRLQNGGKLPLITSCSPGWIKFCEHYYPEFLDNLSTCKSPQQMFGALVKTYYAEKMGIDPSKIFSVSIMPCTAKKYECKRPEMFSSGYQDVDVALTTRELSRMLKEAGINPNKL…	[FeFe] Group A3	[FeFe] Group A3	Bifurcating	Labile	3	[FeFe]-centre, 3 x [4Fe4S] clusters, 1 x [2Fe2S] cluster	NADH dehydrogenase, thioredoxin	1.59553	1.68238	1.20935	0.904703	4.65376	0.573215	0	1.59151	2.88053	1.82684	1.82702	0	1.93383	0	5.42117	1.2565	0	3.87876	0	0	0.578419	2.81543	4.04317	0	2.78479	3.37852	0.967684	0	0.489098	1.34416	1.20227	3.22153	1.15221	0.526666	2.68962	0	0.608504	2.9653	0.540998	0.613512	0
WP_007862869.1	METINLKINGIAVTAPKGTTILEAARLAHIEIPTLCFLKEINEIGACRICIVELKNGKLVTSCVYPIEEGMEVFTNTPKVLDSRKKTLQLLLSNHNRSCLSCVRSGHCELQELAHELGVEDEAYYDGEKTPSEIDYSAAHMIRDNSKCILCRRCVAVCDNIQGIGVIGANHRGFATDIGSAFEMGLGETSCVSCGQCIAVCPTGALTEKDYTGDVFAAIADPAKHVIVQTAPAVRAGLGEEFGLPIGTDVEGKMAAALRRLGFDKVFDTNFSADLTIMEEAHEFLDRVQNGGVLPLITSCSPGWVKYCEHYFPDMTENLSSCKSPQQMFGAIAKSYYAEKAGIDPKNIVSVSVMPCTAKKFEIGRDDQDANGVPDVDISITTRELARMIKKSGIRFLDL…	[FeFe] Group A3	[FeFe] Group A3	Bifurcating	Labile	4	[FeFe]-centre, 3 x [4Fe4S] clusters, 1 x [2Fe2S] cluster	NADH dehydrogenase, thioredoxin, thioredoxin	8.29868	8.48652	9.67478	5.42822	4.65376	20.0625	4.90955	1.59151	4.60884	13.7013	5.48105	0	32.8752	6.02146	3.38823	1.88475	7.66555	7.11105	12.356	3.94835	9.83312	2.67466	5.3909	2.08095	2.47537	4.72993	3.87074	27.6239	2.44549	12.0975	4.00756	12.8861	3.45662	25.28	1.34481	6.5271	8.51905	5.93061	2.16399	9.20268	0
WP_019893070.1	MRGVYNSVTDIRRKVFAAIAEMAYEEDVNYTERLESIPYEIIEGKQAKYRDSIFLERAIIGERLRLGMGLPVRDITTAGAISDGVEESIIAEKFYDQPLINIISFACHACPEKKVMVTDGCQGCLSHQCVEVCPKKAVSIVNGRSEINQDLCIKCGKCQDVCPYNAIIKIERPCAASCGMNAITSDEDGKAKINYDKCVSCGQCLVNCPFGAIVDKGQIFQTIYAMREHEVIAAVAPAFIGQFGANVTPEQVIGGLKELGFADVVEVAIGADLCTIEEAEDFLKKVPEELDFMATSCCPAWSVLAKKEFPQFKDNISMALTPMVLTARMIKKDHPNAKVCFIGPCAAKKLEASRRSIRSDVDFVLTFEEVMGMFSAKKIDLPTITCEETFDKATAAGRE…	[FeFe] Group B	[FeFe] Group B	Evolving	Labile	1	[FeFe]-centre, 2 x [4Fe4S] clusters	None	24.4051	25.8826	13.9075	16.2847	20.1663	26.3679	69.9611	36.6047	23.6203	17.355	22.8377	36.064	18.6937	27.0966	25.7506	3.14125	3.83277	27.1513	10.5909	3.94835	7.51944	12.8102	14.825	18.7286	16.3993	30.4067	20.3214	73.9607	22.0094	16.8021	10.0189	14.819	124.438	19.4866	25.5514	10.2569	28.5997	23.7224	93.5927	20.8594	10.0965
WP_005034114.1	MSEMTNPDTSRRVPASQQAMSVPVPGNLDAIGATVGVNIDGVDVKVPLGTTILDAAKQAGIKIPTLCHHADLCVAGVCRICSVEVEGQRTLQASCSFPVTTPIKVKTHTQKVRQARRHILDLMLSEHCGDCYTCGRNGNCELQTLAKEYGVDSFRFGHVEKPVHEIDRSSYSVVRDNNKCILCRRCVRTCLDLQEVGTIEVLGRSHQSHIGTFLDKPLGDVVCINCGQCINRCPTGALRANDQTDEVWAAIEDPKKHVVIQTAPSPRAAIGECFGMEPGTAMTFELNTALKMAGFDQVFDTNFSADLTILEEGTELLLRLKQALLLREPGAVFPQFTSCSPGWIKYLEHFYPEYIPNLSTAKSPQQMFGAVIKTYYAEKQGIDPKDIVTVALMPCSAKK…	[FeFe] Group A3	[FeFe] Group A3	Bifurcating	Labile	3	[FeFe]-centre, 3 x [4Fe4S] clusters, 1 x [2Fe2S] cluster	NADH dehydrogenase, thioredoxin	0.191765	0.0953943	0	0	0	0.573215	0	0	0	0	0	0	0	0	0	0	0	1.93938	0	0	0.578419	0.281543	0	0	0	0	0	0	0	0	0.400756	0.644305	2.30441	0	0	0	0	0	0	0	0.917866
WP_019880479.1	MKTIYTAEVNCRDCHKCVRICPVKAIGIVNGHATLVANNCIFCGRCVQECPRGAKKVIDNSYKLLDLPKDKQRILSLAPSFIAAFPEYSFEELVSNLHKIGFDYVQETAVGAEIVSYAYKAELEQAKGPLISSCCPVTVNLIEKYYPTLVKYISPTRSPMLAHTALLREKFGQDAYIVFAGPCIGKFQEAESYPEIVDLVITFEHLKNLLKALPSELLNTKLPLDSLPELVEAPATANARFFPIRGGVIKSFMFSEETDIDIFSVSGIEDCMEVFDNLVSGDIKPRFIEAMACRGGCISGPCMLKNKCQPVKRMQVIKFATLSYSNFKDYQEFLPKIKRTFTPKPLKLKEPTEREIRDILRKIGKYSPADEKNCGACGYNTCREKAIATFQGLAEADMC…	[FeFe] Group C	[FeFe] Group C3	Sensory	Labile	2	[FeFe]-centre, 2 x [4Fe4S] clusters, PAS domain	Phosphatase	0.314904	0.153785	0.604674	0	1.55125	0.573215	0.613694	0	0	0.913421	0	1.89811	0	3.01073	0.677647	0	0	0	0	0	0.578419	0.140772	1.34772	0	0.618842	0	0.967684	0	0	0	0	0	0	0	0	0	0	0	0	0.613512	0
WP_012032547.1	MEKREFSPGPVVRSTGQLYDNPEKKVEKIRLIIDGREVEAEKGMSVLEAARLAGIEIPSLCYLRRINEIGSCRVCLVEIEMKGTRTLQASCVYPASGGLVVYTNTPRARRVRKTMVELLLSDHHRECTTCIRNLNCELQNLTDNLGIRNIRYTGEMKMLPVQNKNPFIVRDYNKCIKCRRCEAICSKVQEVNVYSALNRGYDTVIAPAFMQDLSRVACITCGQCVIACPTASLTEKECIDSVWEALEDPNKYVVVQTAPSIQVTLGEVFGYPVGTVVTGKVVAALRRLGFDKVFATDFTADLTIMEEAYELLERLEGRGRLPLLSSCSPGWVKFAEHFYPEFLENLSTCKSPHEMFGALTKTYFAEKEGLDPEKIVVVAVMPCTAKKFEASRPEMGTGK…	[FeFe] Group A3	[FeFe] Group A3	Bifurcating	Labile	3	[FeFe]-centre, 3 x [4Fe4S] clusters, 1 x [2Fe2S] cluster	NADH dehydrogenase, thioredoxin	0.189956	0.0849525	0	0	0	0	0	0	0	0	0	0	0	0	0.677647	0	0	0	0	0	0	0.140772	1.34772	0	0.309421	0	0	0	0	0	0	0	0	0	0	1.86489	0	0	0.540998	0.613512	0
WP_026327676.1	MKIMIELTIDSKKVQVEEGTTILKAARKAGVEIPTLCHFELCDMGIENKPGGCRICVVEVEGRRNLAPSCMTEAQNGMVIHTHNIRVLNARTTVLKLIISDHPFDCLVCAKSGQCELQSLAIQFGIRSQPYEGEQSRYRKDTSPSIIRDVDKCIMCRRCEMMCNEVQTVGALAAVNRGFMSVVAPAFEMNLEDSPCTYCGQCVSVCPTGALTEVDHTNDIIRALSDPTKTVVVQTAPAVRAALGEEFDLPPGTLVTGKMVSALRELGFDYIFDTDFSADLTIMEEGTELLQRLQRYLAGDTEVRLPILTSCCPGWVNFFEHNFPDLLDVPSTAKSPQQMFGAIAKSYFAEKIGVSRKDMIVVSIMPCLAKKYECQRDEFKADGNPDVDYSISTRELAAF…	[FeFe] Group A3	[FeFe] Group A3	Bifurcating	Labile	2	[FeFe]-centre, 3 x [4Fe4S] clusters, 1 x [2Fe2S] cluster	NADH dehydrogenase	0.895276	0.792352	1.81402	1.80941	6.20501	1.71964	0	1.59151	1.72832	2.74026	0	0	1.28922	0	1.35529	0	0	1.29292	0	0	0	1.68926	0	0	1.23768	2.02711	0	0	0.489098	0	0.400756	0.644305	1.15221	0	0	0	0	6.91904	0.540998	3.68107	1.83573
WP_014254572.1	MKGYFHSVTLDEEKCKGCTNCIKRCPTEAIRVRKGKARIIAERCIDCGECIRVCPYRAKKAITDPFENIYNFKFKVAIPAPTLYGQFKYMKSINHLLNAFKLIGFDHVYEVARAAEIISSATKELMKKNDLPKPLISSACPAVVRLIQVRFPNLIDNILKLESPMELAAKIVKDEIEKNKNIPREDIGVFFITPCAAKVTSIKAPYESEKSCVDGAISIKDIYLKLFNGLGEVKQEENLVMAGFTGIRWANSGGESLALGTENFLAVDGIHNVISILEELENDKLEDVDFIETLACQGGCLGGPLTVENLYVAKTRIKKFIDMAKKNVVQENPDNIYDYDLLWKRNVEYKPILKLDEDFEIAMKKLEALQSISEELPGLDCGACGAPNCRALAEDIVRG…	[FeFe] Group C	[FeFe] Group C1	Sensory	Labile	2	[FeFe]-centre, 2 x [4Fe4S] clusters, PAS domain	Histidine kinase	0.230635	0.131248	0.604674	0	0	0.573215	0.613694	0	0.576106	0.913421	0	0	0	0	2.03294	0	0	0	0	0	0	0	0	0	0.618842	0	0.967684	0	0	0	0	0.644305	0	0	0	0	0	0	0	1.22702	0
WP_027717491.1	MQPYFHSVRLDENKCKGCTNCIKRCPTEAIRVRKGRARIIEERCIDCGECIRVCPNQAKLAITDSLERLGEFRYTVALPAPSFLAQFKSEVAPEKVWGGLLTLGFDEVFEVALAAEAVSWAIREYLQSNPDRPRPLISSACPAVVRLIQVRFPSLLGHIIPIESPMEIAGRLARERVCRMTGFPGHQVGTFFITPCPAKVTEVKQPFGGISSVDGAISMSDLYGALLRRLETAKAYPLPLRASGLGIGWGRAGGENEAIRAGSLLAVDGIHNVIGVLEEIERGGLADIDYLEAQACTGGCIGGPLVPQNPFVARVRMGNLVKSHRSQEEWDFPRELGFYHRKVSISARPALKLAEDPQLALARLEEAEKISRELPGLDCGSCGSPSCRALAEDIVQGYA…	[FeFe] Group C	[FeFe] Group C1	Sensory	Labile	2	[FeFe]-centre, 2 x [4Fe4S] clusters, PAS domain	Histidine kinase	1.0623	0.949653	0	0	1.55125	0	0	0	0	0.913421	6.39456	0	0.644611	3.01073	2.03294	0	0	1.93938	0	0	0.578419	0.281543	4.04317	0	6.49784	0	0	0	0	2.68833	0.200378	0.644305	0	0	0	1.86489	1.82551	0	0.540998	0	0
WP_016310471.1	MVKKKAPLRVGETHVQAVRDTFPGAVLDAAWQAEDQVTVTVPKDMLPDVVEFLYYGRGGWLPNMVANDERPINGNYALYYLLSMEESDPGFVTVRAEVDPQSMEYPSVTPRVPACVWSEREAFDLFGLRAQGLPDERRLVLPDDWPADLYPLRKDSMDYRKRPAPVTDVENYSFLYEGQAEEVTEVPMGPLHITSDEPGHFRLFVEGEEIIDADYRLFYVHRGMEKVAESRLNYDAVTFLADRICGICGNAHSVAYAEAVEHAQGIEVPVRGQYIRAILLEVERLHSHLLNLGLVCHYCGFDTGFQHFFRVREKTMDLAVLLTGARKTYGLNLIGGVRRDILDEQKLATIKYVREIRNEVEALVDMLVSTANFESRTAGVGRLDPAVARDYSPVGPCVR…	[NiFe] Group 4a	[NiFe] Group 4a	Evolving	Sensitive	6 or 9	[NiFe]-centre, 1 x [4Fe4S] clusters	NuoL, NuoH, two [FeS] proteins, (three antiporter subunits)	0.128938	0.0255968	0.604674	0	0	0	0	0	0	0	0	0	0	0	0	0	0	0	0	0	0	0	0	0	0	3.37852	0	0	0	0.672082	0	0	0	0	0	0	0	0	0	0	0
WP_022418160.1	MRKFDTKVQHLKYKVLREVAKQAWADTLQDNLLDIPKIIVPGKIPTMRCCVYKERAILAERVKLAMGGNKQNPNVIEVLDIACDECPMGGYEVTNACRGCLAHRCEDVCKFGAITFDENHVAHIDKTKCKECGACSRVCPYSAIHNYRRPCETACKVKAIYMGDEKQACIDNGKCISCGACVYACPFGAINDKSFILNVIDMLKGSNGNRDYKIYAIVAPSISSQFTYAKLGQVITGLRKLGFHTVIEAALGADMVAQAESKELVEKGFLTSSCCPAFVDYINKNFPELKQFVSHNLSPMATIAKYIKSKEANCKTVFIGPCTAKKMEVQKESVKPYVDAVLTFEELQALFDSKEIDITTLEEGVLDNASYFGRIFARCGGLADAVAEGIKEQNLEFAL…	[FeFe] Group B	[FeFe] Group B	Evolving	Labile	1	[FeFe]-centre, 2 x [4Fe4S] clusters	None	21.9144	25.4388	15.7215	16.2847	48.0888	24.6482	7.36432	7.95755	30.5336	60.2858	19.1837	1.89811	15.4707	0	73.8635	0	3.83277	14.2221	0	1.97418	6.94103	31.6736	171.161	18.7286	103.347	21.6225	13.5476	16.9308	18.0966	13.4416	5.61059	16.7519	4.60882	1.05333	1.34481	8.39199	0.608504	25.6993	1.62299	104.911	5.5072
WP_012543804.1	MANNAGVYYHSVTLDEEKCKGCTNCIKRCPAEAIRVRNGKARIIDQLCIDCGECIRACPNHAKVAVTDSWDLMNDFKYRIALPAPSLYGQFKNVDVDNVLTALLEIGFDDVFEVALGADIVSKLTRQALMENRLRRPVISSSCPAVVRLVQIRFPSLLDNVLDLCTPMEVAATLAKDEAVRKTGLKREEIGTFFISPCGAKVTSVRKPIGTDKTDVDGVLSLASVYSAIADKVKKVQPMPLSKASMIGIGWAKSGGEAAGTLLENYIYVDGIQNVIKVLEEVELGKMEDLDFLEAMACVGGCVGGPLTVENNFVAQQRIKKLTEKWQKDRNNNKVPAKDEEQGIYNKMELGRARWKKPLERSDAMELSSDIAEALSMMQRIDEVLATLPGLDCGSCGAP…	[FeFe] Group C	[FeFe] Group C1	Sensory	Labile	2	[FeFe]-centre, 2 x [4Fe4S] clusters, PAS domain	Histidine kinase	1.48591	1.43444	0	3.61881	0	3.43929	0.613694	3.18302	1.72832	1.82684	0.913509	1.89811	1.28922	0	1.35529	0	0	0.646459	1.76515	0	2.89209	3.37852	1.34772	0	1.85652	1.35141	3.87074	5.34656	1.95639	1.34416	0.200378	0.644305	0	0	0	2.79733	0	1.97687	0.540998	3.06756	0
WP_010076791.1	MELIQLTINGRKVEVETGTTILEAAKKLNIEIPTLCHLKLQDGKHVSCTSSCRVCSVEVEGKKNLVAACSTPVAPYMVVKTNTQKVANARKTLVELLLSDHPQDCLKCQKNLKCELQKIASDLNIRQIRYEGERTKTPTDFSSVSITRDVDKCILCRRCVSVCNNIQTIGVLSPVFRGFETIISTAFMEPLAETNCTNCGQCVAVCPTGALRETNDEDRVWDALDDEDKYVIVQTAPAIRAALGEQFGLKPGTNVTGKMVSVLKALGFKKVYDTDFAADLTIMEEANELVNRIKNNKDLPLLTSCCPGWIKFLEHNYGEFLNLPSSCKSPQQMFGAIAKSYLAEKLGVDPKKMVVVSIMPCTAKKFEASRKEMEVDGIRDVDIVLTTRELSSMIRSAGL…	[FeFe] Group A3	[FeFe] Group A3	Bifurcating	Labile	3	[FeFe]-centre, 3 x [4Fe4S] clusters, 1 x [2Fe2S] cluster	NADH dehydrogenase, thioredoxin	0.681643	0.655878	0.604674	0	1.55125	1.14643	0	0	1.15221	0	0	1.89811	0	6.02146	0	0	0	0	0	0	0	2.11158	1.34772	2.08095	0.309421	0	0.967684	0	0	0	0.200378	0.644305	0	0	0	0	0	1.97687	6.49198	0	0
WP_005338995.1	MVNLTIDGRQISVEENTTIMEAARSVGIQIPSLCYLKGINEIGACRVCVVELEGKDRLITACNNICKEGMVIYTNSPKVRKDRRTTVELILSEHDCQCVTCMRSGNCSLQKIANDLDIIELPFHQYLEHQPWDKTFPLIRDSAKCIKCMRCVQVCDKVQGLGVWDVEGTGYHTTVNVSGHNSIREADCALCGQCITHCPVGALRERSDTNEVWKAIEDPDKIVVAQVAPAVRAAWGEELGLAPEDATVGKIIDALKRMGINYVFDTTFSADLTIMEEGNEFVKRFTSGELKDRPMFTSCCPGWVRFIKSQFPHLVKYLSSAKSPQQMFGAVMKTYFAEKLGVSPEKIYTVSVMPCVAKKAEREMDLYYEEYAGHDIDAVITTRELIRMIRSAHISPQTL…	[FeFe] Group A2	[FeFe] Group A2	Evolving	Labile	2	[FeFe]-centre, 3 x [4Fe4S] clusters, 1 x [2Fe2S] cluster	NADH-dependent glutamate synthase	32.6848	38.1946	16.9309	18.9988	21.7175	41.8447	57.0735	49.3368	66.8282	7.30737	36.5404	28.4716	3.86767	9.03219	29.8165	31.4125	15.3311	22.6261	72.371	37.5093	23.1368	12.6695	8.08635	33.2953	15.471	48.6507	18.386	29.4061	18.5857	53.0945	35.4669	56.6989	32.2618	23.1733	24.2065	61.5413	47.4633	33.6068	55.1818	27.6081	74.3472
WP_022094158.1	MAHRSVIPFGPQHPVLPEPLHLDLVIDDDRVIEAIPQIGFVHRGLEKLTEKRDMHQFGYIAERICGICAVGHSCGYASACERMLDIEVPGRVQYIRTILHELSRIHSHLLWLGLLADAFGFEALFYRSWTLREQILKIFESTCGGRVILSINEIGGLKHDIEDSELAGIVQTLDAMRPDYEALVHTFLDDNSCGERLHGVGVISKKDALELSMVGPFGRASGVDYDVRMFDDGAYADLAAFEPIVATDGDCYARCQVRCAEVTQAMDIIKELVGKIPHDGIGGRTKLTPADGARGEVVIEQPRGEAYYYVRGNGTKNLDRFRVRTPTSQNLAGLTHALQGVLLANVPMIILTIDPCISCTER	[NiFe] Group 4e	[NiFe] Group 4e	Evolving	Sensitive	6	[NiFe]-centre, 1 x [4Fe4S] clusters	NuoL, NuoH, NuoC, [FeS] protein	26.741	29.3418	15.1168	0	44.9863	31.5268	22.7067	17.5066	31.6858	14.6147	32.8863	28.4716	0.644611	0	11.52	0	15.3311	0	0	21.7159	0	18.8634	6.73862	10.4048	7.73552	21.6225	0	0	25.4331	20.8345	4.40832	14.819	240.811	0	21.5169	12.1218	69.9779	7.90748	92.5107	28.8351	55.072
WP_022660651.1	MSGKKPVAAPVKATPKSSYNGPVVVDPVTRIEGHLRIEVEVENGVVADVRSSSQLFRGLEIILKGRDPRDAQHFTQRSCGVCTYTHALASTRCVDNAVGVKIPKNATLIRNLVLAAQFMHDHIVHFYHLHALDWVNVANVLNADPKKAASLSNSLNENRKESAADFAAVKDTVKALIESGQLGPFTNAYFLREGGHDAYYLPAEADLMATKHYLDALKLQVKAARLMAVFGAKNPHTQFTVVGGVTCYEAMTEARLKEFTDLYAETSAFVRNFYIPDLLAVASFYKDWAGIGKTTNFNACGEFPEDEYDLNSRFLPQGTILNNDISKVYDFDPTQIEEHVKYSWYEYGSPKHPYAGETKPKYTKLGDKEHYSWMKAPRLDGKSTEVGPLAQVLVAFARG…	[NiFe] Group 1b	[NiFe] Group 1b	Anaerobic Uptake	Sensitive	3	[NiFe]-centre, 2 x [4Fe4S] clusters, 1 x [3Fe4S] cluster	Cytochrome	0.101648	0.00847503	0	0	0	0	0	0	0	0	0	0	0	0	0	0	0	0	0	0	0	0	0	0	0	0	0	0	0	0	0	0	0	0	0	0	0	0	0	0	0
WP_012158789.1	MVKLTIDGIQVEVPKGTTILEAARTLDIHIPTLCHLKGVNNSGSCRVCVVESGPRLVASCSIMAEDGMDIKTNTAKVRESRKTVVKLILSDHKRECTTCIRSENCELQSLSSELNIRDIEYDGERLQLGTDSLSPSVSRDPEKCILCGRCISTCSKVQEVHAIGFIERGFDTTVAPAYAKSLDDVFCTNCGQCITACPVGALYEKENIKDVWKAIYDKEKYVVVQTAPAIRAALGEEFGIPVGTSVTGKMVAALRRLGFDKVFDTDFTADLTIMEEGTELISRLTSGENLPLMTSCCPGWIKFAEHFYPDMLDNLSTCKSPHEMEGALIKSYFAEKMAMDPKKIVTVSIMPCTAKKFESARGELSNDGLQDVDLVLTTRELARMIKEAGIDFENLPVEE…	[FeFe] Group A3	[FeFe] Group A3	Bifurcating	Labile	4	[FeFe]-centre, 3 x [4Fe4S] clusters, 1 x [2Fe2S] cluster	NADH dehydrogenase, thioredoxin, thioredoxin	0.657628	0.617605	0.604674	0	1.55125	2.29286	1.22739	1.59151	1.72832	2.74026	0.913509	0	1.93383	0	0.677647	0	0	0.646459	0	0	0	0.422315	2.69545	0	2.47537	0	0	0	0	0.672082	0	0	0	0	0	0	0.608504	1.97687	1.082	3.68107	0.917866
WP_007039337.1	MNDKPMQTATHSHSTFIPGPDAAMIDISIDGIELKVAQGTSILDAARQVGVRIPTLCHHDDLCTAGVCRICVVEVEGARTLQASCATPVTQPISVKTNTPKVRSARRHIIDLLLAEHYGDCNTCKRNNNCELQSLAAEYGVDFYRFGHPTEPKYAIDRSSPSIVRDMNKCVLCRRCVRACEELQGVGCLTVASRSSRAHVATFASKPLANVVCINCGQCINHCPTGALTELDQTDEVWTMIEDPTKHVVIQTAPSPRAGMGECFGLEPGTPVTQQLNTALKRVGFDAVFDTNHTADLTIIEEGTELILRLYKALVEKDESVKLPQFTSCSPGWVKYMEHFHTNRLDHLSSAKSPQQMFGSLLKTYYAEKKGVDPADMVVVALMPCTAKKFECNRPEMNS…	[FeFe] Group A3	[FeFe] Group A3	Bifurcating	Labile	2	[FeFe]-centre, 3 x [4Fe4S] clusters, 1 x [2Fe2S] cluster	NADH dehydrogenase	0.262917	0.0959494	0	0	1.55125	0.573215	0	0	0	0	0	1.89811	0	0	0	1.2565	0	0	0	0	0	0	0	2.08095	0	0	0	0	0	0	0	0.644305	0	0	2.68962	0	0	0	0	0	0.917866
WP_007665069.1	MAFTNNIMIVRHRLLTELVKLWRDNELVEKIDRLPIELSPRRSKHAGRCCVHKERAVWKYKSLPLLGLDMEDEKDELTPLSEYAVHALDRAENGTPKDNIMCVIDEACSACVQINYEITNLCRGCTARSCQTNCPKKAVHVKESGQAWIDHDECISCGICHKSCPYHAIVYIPVPCEEACPVKAISKDKKGIEHIDESKCIYCGKCLNACPFGAIFEVSQVFDILHKIRKGEKIVAIVAPSILGQFKTTIEQVYGALKAVGFTDVIEVAQGAMDTVSNEAHELIEKLEEGQKFMTTSCCPSYIELVNKHIPGMKPYVSSTGSPMYYAARIAKEKYPDAKVVFIGPCVAKRKEAQRDEAVDFVMTFEEVASVLDGLDIQLEQSQPYTMSFASVREAHGFA…	[FeFe] Group B	[FeFe] Group B	Evolving	Labile	1	[FeFe]-centre, 3 x [4Fe4S] clusters, 1 x [2Fe2S] cluster	None	0.502214	0.520843	0	0	0	0	0	0	0	6.39394	0	0	10.3138	0	0	0	0	0	0	0	0	0	0	0	0	0.675704	0	2.67328	0	0	0	0	0	0	0	0	0	1.97687	0	0	0
WP_006007878.1	MSKLTTFNMPLGPVHVALEEPVYFNLTVEGETIRKVELTSGHVHRGMEALATQRNLIKNVTLTERVCSLCSNSHSFTYSMAVENVLGMEIPVRAHYLRVLAEEIKRVASHLFNTAIQAHIIGFKSLFMHVMEVREMMQDVKETVYGNRMNLASNCIGGVKCDVPPDMLTYILGMVDKVEPAVDEIREIYATNAMVLGRTKGLGLLPREDALRLGVVGPVARGSGIAIDVRKDSPYAAYPDLEFKSITHDGCCIHSRTMVRLDEIFESFKLIRQCCERMPEGPHCVPMRQIHTAEACARSEAPRGEVFYYIRTNGTDIPARLKWRVPSYMNWEALGVMMRDCAVADVALITNSIDPCVSCTER	[NiFe] Group 4c	[NiFe] Group 4c	Evolving	Sensitive	7	[NiFe]-centre, 1 x [4Fe4S] clusters	NuoL, NuoH, NuoC, [FeS] protein, polyferredoxin	1.24668	0.899622	0	0	20.1663	0	0	0	1.72832	0.913421	0	0	0	0	0.677647	0	0	0	0	0	0	27.3097	2.69545	0	0	0	0	0	0	0	0	0	0	0	0	0	0	0	0	0	0
WP_005929426.1	MAFTNNVMIVRHKLLADLVRLWKKDELTDKIDRLPIELSPRKSKPLGRCCIHKERAVWKYKCLPLLGLDMADEKDELTTLSEYARQALDRETCTKENILCVIDEACSSCVQINYEITNLCRGCVARSCYMNCPKDAIRFKKNGQAMIDHDTCVSCGICHKSCPYHAIVYIPVPCEEACPVKAISKDERGIEHINESKCIYCGKCMNACPFGAIFEISQAFDVLQHIRKGEKMVAIIAPSILGQFKTDIEHVYGAFKEIGFTDVIEVAQGAMDTTSNEAHELLEKLEEGQAFMTTSCCPSYIELVEKHIPDLKPYVSTTGSPMYYAARIAKEKHPDAKIVFVGPCVAKRQEIRRDEAVDFILTFEEIGSILDGMDIRLEQAQPFSLAYTSVREAHGFAQA…	[FeFe] Group B	[FeFe] Group B	Evolving	Labile	1	[FeFe]-centre, 3 x [4Fe4S] clusters, 1 x [2Fe2S] cluster	None	0.470816	0.219802	0	0.904703	0	0	0	0	0	0	0	0	0	0	0	0	0	0	0	0	0.578419	0	0	0	14.2334	0	0	0	0	0	0.200378	0	0	0	0	1.86489	0	0	0	0.613512	0
WP_010241437.1	MKKVIINGVQLEVNDNITILKLARDNNIDISTLCFLNNCSNTINKCEICTVEVEGTGLVTACDTYIEDGMIINTNSEAVTDKIKSRISELLDKHEFKCGPCVRRENCEFLKLVIKTKARASKPFLPKDKSEYVDLRSKSLTVDRTKCLLCGRCVNACRINTGTCAMKFIDKGDKTIIGAEDEKCFDDTNCILCGQCIIACPVAALTEKSHMDRVKDALNDPEKHVIVAMAPSVRASMGELFNMGFGVDVTGKIYTALRQLGFNKIFDINFGADMTIMEEATELVQRIKNNGPFPMFTSCCPGWVRQAENYYPELLNNLSSAKSPQQIFGAATKTYYPSITGLDPKNVVTVTVMPCTSKKFEADRPEMENDGLRNIDAVITTRELAKMIKDAKIPFAKLE…	[FeFe] Group A1	[FeFe] Group A1	Evolving	Labile	1	[FeFe]-centre, 3 x [4Fe4S] clusters, 1 x [2Fe2S] cluster	None	0.1143	0.450618	0	0	0	0	0	0	0	0	0	0	0	0	0	4.39775	0	0	0	0	0	0	1.34772	0	0	0	0	0	0	0	0	0	0	0	0	0	0	0	0.540998	0	0
WP_002683184.1	MAVVTTPNGFSLDDSGKRVVVDPVTRIEGHMRCEVNLDENNVIRNAVSTGTMWRGLEVILKGRDPRDAWAFCERICGVCTGTHALVSVRAVEDAAGIKIPTNANIIRNLMQLCLYAHDHLVHFYHLHALDWVDVVSALKADPKKTSELAQSISSWPLSSPGYFLDIQTRLKAFVESGQLGPFMNGYWGNPAYKLPPEANLMAVAHYLEALDFQKEIVKIHTVFGGKNPHPNWLVGGMPCAINLDNTGAVGAINMERLNMVSSIIDQTIDFIDKVYVPDLKAIAMFYKDWLYGGGLSGKNVLSYGEFPDIANDYTNKSLLMPAGAILNGDLSTVHDVDLRDPSQIQEFVSHSWYAYADESKGLHPWDGVTEPKFELGSKSKGTKTNIEQIDESAKYSWIK…	[NiFe] Group 1d	[NiFe] Group 1d	Aerobic Uptake	Tolerant	3	[NiFe]-centre, 1 x [4Fe3S] cluster, 1 x [3Fe4S] cluster, 1 x [4Fe4S] cluster	Cytochrome b	0.256872	0.302989	0	0.904703	0	0	0	0	0	0	0	0	0	0	0	0	0	0.646459	1.76515	0	0.578419	0.563087	0	0	0	0	0	0	0	0	1.40265	0	0	0	0	0	0	0	0	0	0
WP_014450900.1	MVTIYINGDKHEVEEGKTILEVASQLGYHIPTLCHHPELQPIGACRICVVEVEGFKTLQPACATKVADGMVIRTNTERVENAVKLNLELVMANHPHECMYCEADGRCELQKLVHMYDVQPTFGISVSFPKYIDTSSPSIHRDLTKCIKCQRCVRVCSEIQGMNIYSMIERGYETVPETEFGLPVYETNCISCGQCAYLCPVGAIYEAPTWKKLLHMLENKNGKVFIAQTAPSVRVAIGEEFGMEPGTVSTGKMVAALRRLGFDYVFDTNFGADLTIMEEAHELLHRLTKGGVLPMFTSCCPGWVNMVEKEFPEFIPNLSTTKSPMQIMSSTREYFAKKLGVAPENIVMVAVMPCTAKKDEIERSQHVVNGIKVTDYVITTREFAKMLRFKGISFVNLPE…	[FeFe] Group A1	[FeFe] Group A1	Evolving	Labile	1	[FeFe]-centre, 3 x [4Fe4S] clusters, 1 x [2Fe2S] cluster	None	0.675666	1.60891	0	0	0	0	1.22739	3.18302	0	1.82684	1.82702	0	0.644611	3.01073	0.677647	0	0	0	0	0	1.15684	0.281543	0	0	0	0	0	0.891093	0	0	0.400756	0	5.76103	0	0	0.932444	3.65102	5.93061	0.540998	1.22702	0
WP_020815721.1	MDMINLKIDGFDVSVPKNTTILEAAKQLNIDIPTLCFMKGVNEPGSCRVCVVEVAGWRGLHPACVTKVSEGIVVKTATSTVREARKNILELIMANHNRECLSCPRNLKCELQTLCNDNGIDAIPYEGKVDKGCLDTSGPIVRDPNKCVLCGRCVSVCSKIQDVSAIDFAFRGAHMTVTTAYEEGLANQECINCGQCIKICPVGALQERDDTEKVWKALENPELHVVVQTAPAVRVALGEEFGFAPGTNVEGEMVTALRRLGFNKVFDTNFSADLTIIEEGNELIDRIKNGGKLPLITSCSPGWIKYCEHNYHDFIENLSSCKSPQQMFGAIAKSYYPIKTDVDPKSVFVVSVMPCTAKKYEADREEMNVDGLKDIDAVITTRELAKMIRQAGIKFAELE…	[FeFe] Group A3	[FeFe] Group A3	Bifurcating	Labile	4	[FeFe]-centre, 3 x [4Fe4S] clusters, 1 x [2Fe2S] cluster	NADH dehydrogenase, thioredoxin, thioredoxin	0.262705	0.146901	1.20935	0	0	0	0.613694	0	0	0	0	0	0	0	2.03294	0	0	0	1.76515	0	0	0.140772	1.34772	0	0	0.675704	0	0	0.978197	0.672082	0	0.644305	0	0	0	0	0	0.988435	0	0	0
WP_018085928.1	MFPIITNQASCRDCYRCVRSCPVKAISIRSKNGNGEFYAQIIEDICVLDGRCVQVCPQQAKKVSPAQDRVRAMLKAGEKVAVSLAPSFAAALPLSRPRTLVSMLKKLGFAYVSETSLGAEMVSAAHKELGFKQPYISSACPVVVNLIEKHFPDLIPYLAPLVSPMIAHGRYLKRLLPDHKVVFIGPCIAKKAEITCPELAGAVDEVMGFQELWEWLTTECLCEEDCEEAGFDGPQPALARLYPVDGGMLRTIAPSTDILESKVITVTGLKNCWEFLQHLQGGFIDHPPYLMELLACNGGCISGPLSVTGDDIYVKRQKIQAYYRSCLLSTDETCSFACLSRPELPADLLRRSFTNKKLSLPNPSEQEIRDILAQTGKYTEADELNCGACGYNSCRDKAV…	[FeFe] Group C	[FeFe] Group C3	Sensory	Labile	2	[FeFe]-centre, 2 x [4Fe4S] clusters, PAS domain	Phosphatase	0.229829	0.139853	0	0	1.55125	0	0	0	0.576106	1.82684	0	0	0	0	0	0	0	0	0	0	0.578419	0.140772	0	0	0.309421	0	0	0.891093	0.489098	0	0	0	0	2.63333	0	0	0	0	0.540998	0	0
WP_011722917.1	MKFETELNRVKYEVLKEVAILAKEDRLDKENVENISYNLIKGDKPQYRCCVYHERAIVKERAKLVAGYIPNGDSPKYIKQDDNDGKIMYVIEAACDRCPINKYTITEACRGCVQHKCMEVCPVKAITKINGRAYINQDVCRECGMCKQVCPYNAISEVMRPCKKVCPTEAICISPQDRRAEINDEECISCGACMKACPFGAISDKSYIVPVVEAIKNNKKVYALVAPAITGQFGPKVTVGQVKDGLKKAGFVDMIEAACGADAVTCHEAEEFVERMEKGDNFMTNSCCPAFVSYIEKKFPDQVEKISGTVSPMIATGRWIKKKEEDAIVVFVGPCTAKKSEIGREGLKDAVDYVLTFEEIAAIFGAYNVEVEECEDLEVEDASALGRGFAQGGGLSAAV…	[FeFe] Group B	[FeFe] Group B	Evolving	Labile	1	[FeFe]-centre, 3 x [4Fe4S] clusters, 1 x [2Fe2S] cluster	None	0.198586	0.0778901	0	1.80941	1.55125	0	0	0	0	0	0	0	0	0	0	0	0	0	0	0	0	0	1.34772	0	0.309421	0.675704	0	0	0	0.672082	0	0	0	0	0	0	0	0	0	0	1.83573
WP_004092218.1	MSQRITIDPITRIEGHLRIDCEIENGKVTKAWSSGTMWRGMEEIVKGNDPRDAWMIVQRICGVCTTIHAIASVRAVENAIGAEVPVNAQYIRNLIVAAHSIHDHIVHFYQLSALDWVDITAALNADPKKCEAMLKGVSSWSLNSSEEFAKVQQKIRDLVASGQLGIFANGYWGHKAMKLSPEVNLIAVAHYLQALECQRDANRVVAILGGKSPHIQNLAVGGVANPINLDAPSVLNLERLMYVKMFIERLGEFIEQVYKVDAAIIAANYPEWLSLGEGAKHYLSVPELPTDAKGGSFLMPGGYIENGDMSNYRPITSHQDKWLIDGIAESCKHSWYKDDAILKPWEGKTEPNYTGWQDEGKYSWVKSPTFYGKVVEVGPLADLLVKLAAKHPDTVKHFN…	[NiFe] Group 1c	[NiFe] Group 1c	Anaerobic Uptake	Sensitive	4	[NiFe]-centre, 2 x [4Fe4S] clusters, 1 x [3Fe4S] cluster	[FeS] protein, TM subunit	0.26655	0	0	0	0	0	0	0	0	0	0	0	0	3.01073	0	0	0	0	1.76515	7.8967	0	0	0	0	0	0	0	0	0	0	0	0	0	0	0	0	0	0	0	0	0
WP_028263961.1	MSNTMRGVYTNLTEIRRNVFREVAAVAYGNAKDETTRLEELPYKIIPGEIATYRESVFLERAIVAERIRLALGLPLQGVDKPAPLTDGIEDALKPETYYEPPLINIIKFACNACADNVYRVTDGCQGCLAHPCREICPKGAISFVDKKAYIDQEKCIKCGRCFDVCPYHAIAHQERPCAAACGMHAISSDKNGHADIDYNKCVSCGQCLVNCPFGAIADKSQIFQVIQAMHYGEEVIAAVAPSFVGQFGGKGNVGKLREAFKQLGFGGVEEVALGADLCSVEEAHMFLEEVPQKQAFMATSCCPAWSVMAKKEFPEHADKVSMALTPMTLTARMIRREHPHAKIVFVGPCSAKKLEAMRKSVRSEVDFVLTFEELAGMMEAKHIDYSSLADDNKSDFNV…	[FeFe] Group B	[FeFe] Group B	Evolving	Labile	1	[FeFe]-centre, 2 x [4Fe4S] clusters	None	9.77807	10.5337	11.4888	9.04703	4.65376	6.87858	14.115	27.0557	6.91327	7.30737	9.13509	5.69432	10.3138	18.0644	7.45411	2.513	0	19.3938	12.356	1.97418	7.51944	4.64547	0	4.16191	5.26015	15.5412	7.74147	14.2575	5.86918	7.3929	6.4121	10.3089	11.5221	13.1666	17.4825	8.39199	17.0381	7.90748	19.4759	2.45405	11.0144
WP_013252233.1	MADTMRGVYTNLTKIRRDVFREVARVCYSLNDNPDGTDEDFDARFDELPFQILPGDVATYRESVFLERAIIGERIRLAMGLSLQGVDRPARISEGFANSEVGDLAYYEPPLINVIKFACNACKDNVYTVTDQCQGCLAHPCREICPKQAISFVDKRAHIDQDLCVQCGMCERTCPYHAIHHHVRPCAAACGMHAIGSDEHGRADIDYEKCVSCGQCLVNCPFGAIADKSQIGQVIWSILAGDEVIAAVAPSFVGQFGGKGNVGKLREAFKRLGFSGVEEVALGADLCTVQEADDFLDEVPDKLPFMGTSCCPAWSVMAKKEFPEHADCISMALTPMTLTARMIRTRHPNAKIVFVGPCAAKKLEAMRRSVRSEVDFVLTFEEMAGMMEARGIDYLALKD…	[FeFe] Group B	[FeFe] Group B	Evolving	Labile	1	[FeFe]-centre, 2 x [4Fe4S] clusters	None	3.41795	3.48421	1.81402	1.80941	1.55125	1.71964	3.06847	4.77453	7.48937	4.5671	1.82702	1.89811	5.15689	3.01073	4.74353	0	0	2.58584	3.53029	7.8967	1.15684	2.25235	4.04317	8.32381	4.64131	3.37852	1.93537	0.891093	7.82557	3.36041	2.40454	4.51014	11.5221	1.05333	2.68962	0	0	13.8381	5.95098	7.36215	0
WP_008382437.1	MTSSDVSAAPAGATATDTTARELSATINGQPVTGRAGESILECARRHGVYIPTLCELADIDHTPGTCRVCLVEIRTKGSSKTHLVTSCTTPMEDGIEIRTRTAALRAMQRLQVELLLADHDQDCATCIRHGKCDLQDVAQFVGLTQNRFFDPARVAARPVDDSSPALIRNMQRCIRCQRCIAICRDGQGVDALIQTGSGLETAVGLRYGLTQKNSACVTCGQCVLVCPTGALGERDETDRALEMMYDPELITVVQFAPAVRVGFGEEFGLPPGTNVEGQIITALRMLGADIVLDTNWGADLVIMEEGTELLHRLKKKQRPTFSSCCPAWINFVERHYPDIIPMLSSTKSPQQCVGTLAKTYLPEKMGIDPKKIRVISVMPCIAKKDEIARRQLSHDGVP…	[FeFe] Group A2	[FeFe] Group A2	Evolving	Labile	2	[FeFe]-centre, 3 x [4Fe4S] clusters, 1 x [2Fe2S] cluster	NADH-dependent glutamate synthase	0.155241	0.0827904	0	0	0	0.573215	0	0	0	0	1.82702	0	0	0	0	0	0	0	0	0	0	0.140772	0	0	0	0.675704	0	0	0	0.672082	0	0	0	0	0	0	0	0	0	0	0
WP_029502830.1	MANINIKINGMEVSAPAGSTILEAARLAHIEIPTLCYLKEINEIGACRICVVEVKGARSLVASCVYPINEGMEVFTNTPKVLKSRKRTLQLILSNHDRRCLSCVRSGDCELQKLCKDLGVEDESLYDGEKGIYELDESAAHMVRDNNKCILCRRCSAVCSQTQGIGVIGANERGFKTNIGSAFEMGLGETSCVSCGQCIAVCPTGALYEKDSVDEVLEAIADPEKFVFVQTAPAVRAGLGEAFGLPIGTNVEGQMIAALRRVGFDKVFDTNFSADLTIMEEATEFLDRVQNGGVLPLITSCSPGWIKYCEHYFPEMTENLSSCKSPQQMFGAIAKTYYAKKLGIDPEKMVSVSIMPCTAKKFELGRDDQSAAGVPDVDYSLTVRELARLIDKVGLNFLS…	[FeFe] Group A3	[FeFe] Group A3	Bifurcating	Labile	4	[FeFe]-centre, 3 x [4Fe4S] clusters, 1 x [2Fe2S] cluster	NADH dehydrogenase, thioredoxin, thioredoxin	7.20282	7.63724	10.8841	12.6658	6.20501	14.9036	6.13694	3.18302	2.88053	9.13421	0.913509	7.59242	3.86767	0	3.38823	0.62825	11.4983	3.87876	1.76515	1.97418	9.83312	11.121	13.4772	0	6.18842	8.10845	6.77379	26.7328	11.2493	4.03249	5.61059	5.79875	2.30441	1.58	9.41366	2.79733	1.21701	2.9653	3.24599	12.2702	0.917866
WP_022095197.1	MIETENKVYARRCESHVEALRRAVPGCIEKVEWQCEDQLTITVKQDKLPEAVHYLYYERYGWIPVIIGNDERSLCGRYAVYYVISMEGEDPGWVTVRTEVDPAKMTFPSVTPFVPACVWGERELRDMFGLIPEGLPDRRRLVLPDDWPSGLYPLRKDSMDYRFRPAPASDMENYEFLADTKGKETTLVPMGPLHITSDEPGHFRLFVEGETIVDADYRLFYVHRGMEKVAETRLNYDAVTFLADRICGICGCAHSVAYAEAVERAQGIHVPPRAQYIRAIMLEVERLHSHLLNIGLASHYTGFDSGFQQFFRVREKSMDLAEKLSGHRKTYGLNVIGGVRRDILAEQKLSTLTTIHQLRSEVQELVDVLLSTPNFIERTSGIGILDRKIARDFSPVGPL…	[NiFe] Group 4a	[NiFe] Group 4a	Evolving	Sensitive	6 or 9	[NiFe]-centre, 1 x [4Fe4S] clusters	NuoL, NuoH, two [FeS] proteins, (three antiporter subunits)	10.0814	10.9952	10.2795	0	12.41	22.3554	4.29586	0	23.6203	0	3.65404	11.3886	0	0	0	0	11.4983	0	0	0	0	7.17936	1.34772	4.16191	1.23768	8.10845	0	0	5.38008	14.1137	5.00946	4.51014	118.677	0	8.06885	16.784	8.51905	1.97687	49.7718	6.13512	20.1931
WP_020003846.1	MVKIKINGKQIEVEEGLTILKAAKKLGIKIPSLCYHPDIPPTSACGICVVKLANQGNKYVRSCSMIVEEGMDIITHDAEINTVRKGVLELVLSAHPNDCLNCIRNGECELQTAAADFGVRNSKYDNIKQNHPRDESAGSIVLNPEKCIKCGRCVVVCQEMQKVHALGFVNRGFDTYFAPSAVSLKDSPCVDCGQCAAHCPVAAIYEKDQTKEVEAAIDDPNTYVTVQMAPAVRVALGEYFGLKAGENITGKIYAAMRLMGFNAIFDTNFGADLTIIEEAHEFVKRFTESNGTSAMTTSCCPAWVKYAEEYYPDLLDNVSSAKSPHMMLAPMTKTYYSEKANVDPFTIFNVSIMPCTAKKNEIRKNETMYSSGYKDVDVVLTTREFARMIKHYGIDVAGI…	[FeFe] Group A3	[FeFe] Group A3	Bifurcating	Labile	3	[FeFe]-centre, 3 x [4Fe4S] clusters, 1 x [2Fe2S] cluster	NADH dehydrogenase, thioredoxin	0.149777	0.0722273	0	2.71411	0	0	0	0	0	0	0	0	0	0	0	0	0	0	0	0	0	0.563087	0	0	0.618842	0.675704	0.967684	0	0	0	1.00189	0	0	0	0	0	0	0	0	0	0
WP_015849571.1	MNSRIEYWVKIPIGPIHPALEEPEKFIITLDGERIIHVDIKLGYNLRGLEWIAMRRNYIQLLYLVERICGICSFSHNHTYTRAVEEMAGIEVPERAEYIRAIIGELERIHSHLLNLGVVGHAIGYDTVLHLSWLARERVMDILEAIGGNRVNYAMNTIGGVRRDIEEKHKRMILDMIKHYREEVMPKVEEIFLYDPTVEARLRDAGVIPKRIALEYSAQGPTARGSGIKKDVRYNERLGVYPELGIKPITPKEFTGVIKGDVFDRMVVRVGELWQSMEIIEKAFDQMPEGKIKTFSKDNVTLTKLKKAEGAGIGRYEAPRGETIHYVRANPGTDTPAKWKAREPTFPNLFAVARALVGEQLADVPVAIASIDPCLSCTDRVAIIDSETGKKRVLTEKDL…	[NiFe] Group 4b	[NiFe] Group 4d	Evolving	Sensitive	13	[NiFe]-centre, 1 x [4Fe4S] clusters	NuoL, NuoH, NuoC, two [FeS] proteins, seven MRP antiporter subunits, etc.	0.164206	0.0394952	0.604674	0	1.55125	0	0	0	0	0	0	0	0	0	0	0	0	0	0	0	0	0.281543	1.34772	0	0	1.35141	0	0.891093	0	0	0	0	0	0	0	0	0	1.97687	0	0	0
WP_027305891.1	MSQKIIVDPITRIEGHLRVEVIIDENNVVQEAYSGSTLWRGIEVIVKGRDPRDVAFMTQRICGVCTFSHYKAGIVAVEDALGIVPPLNAQLTRTLMNAALFLHDHIVHFYQLHALDWVDIVSALSADVKKASDIAFLYTPNPYATGADKLLEVQQRIKTFVEKGNLGPFANAYYGHSTYHLSPEENLIALSHYLECLRIQRIVAQCMAIFGAKNPHPQSLTVGGVTCVMDLLNPSRMGEYLVKFQEVADFVNRAYYPDLVMAGKAYANEASVLNDVGVSNLFTFKEFQIGKDEWLFESGIIKNGDISKVYEVEEDKITEEATHSWYADDEPLHPYDGKTNPNYTGLIDGESIDQHGQNTHSKVFDTKGKYSWIKAPRYDGEPMQVGPLANVVVNYAKGN…	[NiFe] Group 1b	[NiFe] Group 1b	Anaerobic Uptake	Sensitive	3	[NiFe]-centre, 2 x [4Fe4S] clusters, 1 x [3Fe4S] cluster	Cytochrome	0.169754	0.141781	0	0.904703	0	0	0	0	0	0	0	0	0	0	0.677647	0	0	0.646459	0	0	0	0	0	0	0	0	0.967684	0	0	0	1.20227	0	0	0	0	0	0	0	0	0	0
WP_016308760.1	MGKATVIPFGPQHPVLPEPLHLDLVVQDETVVDVLPQIGFVHRGLEKLVETRDYNQFIYIAERICGICATGHSIGYAETVESLMGVEIPKRAEYLRIIWHELSRVHSHLLWLGLAADAFGFESMFMHCWRLRERVLDLFEKTTGGRVILSVVKVGGVVRDIDATQMAEIIAVLDGLKDDYTKIMNTLLTDASVKNRTVGVGHISTEDARSLSMVGPFARASNLPYDVRSFGKGAYGDLADFQPIVATEGDCYARVKVRCLEVLQSIEIIKELAAKIPAGDIEVAVKGAPADGAQASNVLEQPRGECYYYARGNGSKNLERMRIRTPTSQNLAGMTVALKGCDLADVNMIILTIDPCISCTER	[NiFe] Group 4e	[NiFe] Group 4e	Evolving	Sensitive	6	[NiFe]-centre, 1 x [4Fe4S] clusters	NuoL, NuoH, NuoC, [FeS] protein	0.302634	0.187409	0	0.904703	0	0	2.45477	0	0.576106	0	0	0	0	0	0.677647	0	0	0	5.29544	0	0	0	0	0	0	0	0	1.78219	0	0	0	0.644305	0	0	0	0	0	0	0	0	0.917866
WP_024276826.1	MTIQTPNGFSLDTSGKRIVVDPVTRIEGHMRCEVNVDSNNIIRNAVSTGTMWRGLEVILKGRDPRDAWAFVERICGVCTGCHALTSVRAVEDALQIKIPNNAFLIREIMAKVLQWHDHVVHFYHLHALDWVNPVNALKADPKATSVLQQSISAHSKSSPGYFRDVQNRLKKFVESGQLGIFKNGYWDNPAYLLPPEADLLAVTHYLEALDFQREIVKVHTIFGGKNPHPNYLVGGVPCAINMNGDMAAGAPLNMERLNFVKLKLQEAFEFSQNVYVPDVIAIASFYKGWLYGGGLSGQNVMDYGDYEAIQGQKKTDRLPGGVILNGNWNEVHPIDPRDPAQVQEFVAHSWYTYGEGNNDKGLHPWDGVTDPQYKLGPAAKGTRTDIQEIDENAKYSWIK…	[NiFe] Group 1d	[NiFe] Group 1d	Aerobic Uptake	Tolerant	3	[NiFe]-centre, 1 x [4Fe3S] cluster, 1 x [3Fe4S] cluster, 1 x [4Fe4S] cluster	Cytochrome b	0.237413	0.121876	0	0	0	0	0	0	0	0	0	0	0	0	0	0	3.83277	0	0	0	0	0.140772	0	0	0	0	0	0	0	0	1.00189	0	0	0	0	0	0	0	0	0	0
WP_014450901.1	MVTIYINDKPYQVPENKTVLEAAADLGFKIPTLCHHPELEPIGACRICVVEIEGARTLQPACTTKVADGMKIKTNTERVESAVKFNLSLIMSNHPHECMYCEADGRCELQKLVHMYDVQPIFGVNVNIEKEIDMSSPSVHRDLSKCIKCQRCVRVCSEIQGMNIYSMIERGYESLPETEFGVPLYETDCISCGQCANLCPVGAIYEAPDWKKVWKMLNSKEPGKVYVAQTAPSVRVAIGEEFGMEPGSISTGKMVAALRRLGFDYVFDTNFAADLTIMEEGYELIGRLQNGGKFPMFTSCCPGWVNEMEKEWPELREHLSTAKSPQQMMSSVVKTYFAQKIGVKPEDIVMVSIMPCTAKKDEITRPQQLVDGIKVTDYVITTRELGKLIKLKGIPFVNL…	[FeFe] Group A1	[FeFe] Group A1	Evolving	Labile	1	[FeFe]-centre, 3 x [4Fe4S] clusters, 1 x [2Fe2S] cluster	None	0.759595	0.717233	0	0.904703	1.55125	0	0	0	0.576106	0	0	0	4.51228	0	0.677647	0	0	0	0	0	0	0.140772	0	2.08095	0.928262	0	0	6.23765	0	0	0	0	0	8.95332	1.34481	0	0	0	0	0.613512	0
WP_013625216.1	MGERTIIPFGPQHPVLPEPLHLDLILEDEKVVGAVPSIGFVHRGLEKLVEKRDFNEMAYVIERVCGICSFMHGQGYVQTVEGIMGVEIPDRAKYLRTIWAELSRIHSHLLWLGLMADAFGFESLFMHCWRVREKVLDIFEETTGGRVIFSVCKVGGVWKDIDNDTLKRIVNVLKVVETETKELTKVFVKDFTVQKRTKGVGVLTYKEAFELGAAGPVARGSGIAMDLRKLGYAAYSDLSFEPIVEKDGDCYARCNVRIGELFQAIDLIRQAVERIPDGEIEVKVKGNPPKGEYMSRLEQPRGQVVYYARGNGTKFLDRVRVRTPTFANIPPLLKMIPGSDLADIPILALTIDPCISCTER	[NiFe] Group 4e	[NiFe] Group 4e	Evolving	Sensitive	6	[NiFe]-centre, 1 x [4Fe4S] clusters	NuoL, NuoH, NuoC, [FeS] protein	0.382354	0.336949	0	0.904703	0	1.14643	0	0	0.576106	0.913421	0	0	1.28922	0	0	0	0	0	0	0	1.73526	0.703859	0	0	0	0	0.967684	0.891093	2.44549	0	0.200378	0.644305	1.15221	0	0	0	0.608504	0.988435	0	0	0
WP_022349260.1	MVEITIDGNVYEAEEGATILEVAREHRVDIPTLCYLREINEIGACRVCLVEVEGIDHLVAACNNEVTDGMVVYTDTPRVRRARVANLQLILSRHDRRCPTCFRNGTCQLQALTDRMGVHEVPYTTFFETKPIDARFPLVREPEKCVNCLRCVSTCQKVQALGVWDLVDSGSRAHVDAVAPDDCAFCGQCIANCPTGALHERDDTERVFDAIFDPDTITIAQVAPAVRSSWAELLDLGGKPPTPGRMVAAIRRLGFDYVFDTDFAADVTIMEEASELIEHLKEGAEGPMFTSCCPGWVRFAKTRYPELAKKLSTTKSPQQIFGALAKTYYAEILGVDPAKIFVVSYMPCVAKKMEAAYPGMDSTGTGPDVDAVLSVRELTRQLRQRFVNVDLLEEEDFDR…	[FeFe] Group A2	[FeFe] Group A2	Evolving	Labile	2	[FeFe]-centre, 3 x [4Fe4S] clusters, 1 x [2Fe2S] cluster	NADH-dependent glutamate synthase	2.52086	2.59174	0	2.71411	0	1.14643	6.13694	0	5.76106	10.0476	2.74053	0	0	21.0751	0.677647	0	0	0	0	0	2.31368	1.68926	0	2.08095	2.47537	8.10845	0.967684	0	4.40189	0	1.20227	1.93292	19.5875	0	8.06885	3.72977	0	4.94217	5.40998	1.84054	0
WP_008410059.1	MSGKITINGQVIDFTDEKNILSVARKAGIEIPTLCYHPELTIAGACRLCVVEIERMGIQASCSTAPVDGMVVYTNSERVNRVRKMVLELLLANHDRECTTCESSGACKLQKYASDYGIKRLRYPGRTAPAPLDTSSLSVVRDPNKCILCGLCVRVCKEIQGIGVWDFKNRGSRTEIVAAMDQPLAESACINCGQCIAVCPCGALTSNSTAIDEVWAAIRNPKKTVICQIAPAPRAALGEEFGLGSVDVTKKIVAALRKIGFDKVFDTVFTADMTTIEEANEFLSRLVKGEKLPLFTSCCPGWVKYAEQFHPELLNNLSSCRSPQQMFGSLLKKKYAKELGIAPQDMFVVSIMPCTAKKYEAKRPEFMTEGAYDVDAVLTTVEAARMFREAGIIFSSLAD…	[FeFe] Group A3	[FeFe] Group A3	Bifurcating	Labile	3	[FeFe]-centre, 3 x [4Fe4S] clusters, 2 x [2Fe2S] cluster	NADH dehydrogenase, thioredoxin	0.338454	0.196097	0	0	0	0	0	1.59151	0	2.74026	0	0	0	0	0.677647	0	0	0	1.76515	0	0	0.703859	0	2.08095	0.928262	1.35141	0	0	0	0	0	0.644305	0	0.526666	0	0	0.608504	0.988435	0	0	0.917866
WP_027629995.1	MQTFKDLYNRLVKAAVQNRVEEEVEEIRKQDFDPHQLDCLLHPKDYGPVWRLGDCDCCDDDGKNCPTKCLFDALEKDEKGNVSINVEKCVGCSGCVDRCKAEKLVGSRDILPTLDAVNNAQGPVYAMIAPAFTSQFSEEVTPGKLRSAFKRLGFAGMLEVALFADILTLKEALEFDRNILDEKDFLLTSCCCPMWIAMIRRVYSQYVPHVPGSVSPMIACGRSIKLLEPNAVTVFIGPCIAKKAEAREKDIADAVDFVLTFQEVRDIFEAAGIDPARLKEDSRDHSSKAGRIYARTGGVSEAVQTTVERLNPHRKISVKARQADGMPACKELLGALKEGRITENFLEGMGCVGGCVGGPKAILNREDGRKNVMAYGSQALYSTPIDNPYVIDLLHRLGF…	[FeFe] Group B	[FeFe] Group B	Evolving	Labile	1	[FeFe]-centre, 2 x [4Fe4S] clusters	None	0.290627	0.211681	0	0	0	4.0125	0	0	0	0	0	0	0	0	0	0	0	0	0	0	0	0	0	0	0.618842	0	0.967684	1.78219	0	0	0.200378	0	0	0	0	0.932444	0	0	0	0.613512	0
WP_008409712.1	MLKQVVYTDKERCRLCSACLQVCHTKSIKTDQGKAEIIADSCLSCGLCIGVCSKGAKRYLDSTQAVQQLLAARQCALVLAPSYVIVAKKRYGCSPEQFAAAMKKLGFSLVYEAGFGADVVTKVYLDYLAQRINEKGRENTHVITSPCPSLMNYVEKHVPELIEEFAPVLSPMAAQALLVKHWTKDKAAIIGASPCVAKKSELLDEQLGLFDAVLRFEELCNWLDNANIKPSVLPPIEGDGIEALYGAGFPISGGLTKTLEQFSGKLELNPIGDDILILEGEDRSIEFLKHMALDKKKDNNLKGYPLLIDILYCEGCIVGKAMGVKGSLLENKKIVADYTRHRFAKMQKKGLFKKYNGYRFVVKNTVQAPEFKEWLAVVEKLIQEKRFWRSWQNRKYMRK…	[FeFe] Group C	[FeFe] Group C3	Sensory	Labile	2	[FeFe]-centre, 2 x [4Fe4S] clusters, PAS domain	Histidine kinase	1.06568	8.11062	1.20935	0	1.55125	0	1.22739	0	2.30442	0.913421	0.913509	0	0	0	1.35529	5.026	0	1.93938	0	0	8.09786	1.9708	1.34772	4.16191	0	0.675704	0	0.891093	2.44549	0	0.400756	0.644305	0	0.526666	1.34481	1.86489	0	0	0	0.613512	0
WP_018660435.1	MEMVKLTIDGIEVEVPRGTTVIEAARQIGINIPSLCYLKGVSHTSSCRVCVVEVGPRLIASCTLPCENGMEVKTNTPKVREARRTVVELLLSNHKRECTSCNRSENCELQTLAKELNIRDLRFEGERISYEIDNSSPSLVRDQEKCVLCGRCINTCKNVQTVGAIDFSRRGFNTRVSTALDKNIADTVCVNCGQCIMACPVGALTEKENIKEVWKALADPEKFVVVQTAPAVRVALGEEFGMPIGTRVTGKMAAALRRLGFDKVFDTDFAADLTIMEEGTELLTRLEKGERLPLMTSCCPGWVKFVEHFYPELIDNLSTCKSPHEMEGALIKHYLAEKLGVDKKNVVVVSIMPCVAKKFEGQREELSNENLQDVDYVLTTRELAQMIKEAGIDFTKLPD…	[FeFe] Group A3	[FeFe] Group A3	Bifurcating	Labile	4	[FeFe]-centre, 3 x [4Fe4S] clusters, 1 x [2Fe2S] cluster	NADH dehydrogenase, thioredoxin, thioredoxin	3.39105	3.54783	0	8.14233	4.65376	11.4643	1.22739	1.59151	2.30442	4.5671	4.56754	1.89811	4.51228	0	1.35529	0	3.83277	2.58584	0	0	2.89209	5.91241	4.04317	2.08095	7.4261	4.05422	3.87074	9.80202	1.95639	4.03249	1.8034	1.28861	1.15221	0.526666	0	3.72977	0.608504	2.9653	0.540998	10.4297	0
WP_029725248.1	MVALTIDNLAVEVPEGSTILEAARSAGIHIPSLCTLAEIQHSPGACRVCVVEVERARSLVASCVYPVANGMKVKTNTRRVREARQQVIGFLLSDHPKDCNICQKHGNCELQQVAELVGQREITVPCTDFIVHDIDDSTDVLVRDMAKCIHCLRCVTVCADVQGVSLLTPEGRGFDSRVVPAMGHCLADSACTFCGQCTVVCPTGAIVEKDHTDRVWAALEDPAKHVVVQEAPAIRAQLGEEFGMAPGNLVTGKMITALRRLGFDRVFDTNFTADLTIVEEGHELLHRAKTGGKLPMITSCSPGWIKFIEHFYPDLLPHLSTCKSPQQMFGALAKTYYAQKQGIDPADIFVVSIMPCTAKKFEATRPEMRSSGHRDVDVVLTTRELGRMLRQAGIDLAIL…	[FeFe] Group A3	[FeFe] Group A3	Bifurcating	Labile	3	[FeFe]-centre, 3 x [4Fe4S] clusters, 1 x [2Fe2S] cluster	NADH dehydrogenase, thioredoxin	0.311986	0.247911	0.604674	0	1.55125	0	0	0	0	0.913421	0	0	0	0	0	0	0	0	0	0	0	0.422315	0	0	2.47537	0	0.967684	0	0	0	0.200378	0	0	0	0	0	0	0.988435	1.082	1.22702	0
WP_028828670.1	MSTVNVKINNISYQFPKGLTILQACNQINIEVPTLCYLKEINEIGACRICVVEVKGAKNLVASCVHPLSEGMDILTHSEKVLKARKITLELILSTHDRSCLSCIRSDNCELQKLCHDFKVDDEAKYDGHNQVYKTDDSAIHMYRDDNKCILCRRCVAACSKLQSVGVIGVNERGFKTHIGCAFEEDLGKTDCVSCGQCIVVCPTGAIAEKDDTDKVWAALADESKHVIVATAPSIRVTLGEAFGMPVGTNVKGKMVTALKHLGFAGVYDTDIAADLTIIEESQELITRIQNGGPLPLITSCSPGWIKFCEHNFHDFIPNLSSCKSPQQMFGAVVKTWYAEKNNLDPHDIVVVSVMPCTAKKFEARRDNQSAAGVYDIDIAITTRELARMIKRAGIQFKK…	[FeFe] Group A3	[FeFe] Group A3	Bifurcating	Labile	3	[FeFe]-centre, 3 x [4Fe4S] clusters, 1 x [2Fe2S] cluster	NADH dehydrogenase, thioredoxin	4.43394	6.88849	6.65141	3.61881	0	11.4643	0	0	3.45663	2.74026	8.22158	0	0	0	0	1.88475	3.83277	1.93938	1.76515	0	2.89209	2.81543	4.04317	2.08095	12.6863	2.70282	1.93537	7.12874	0.489098	14.7858	2.20416	2.57722	0	0.526666	1.34481	0	2.43401	0.988435	1.62299	1.84054	0.917866
WP_026485852.1	MDKVSVTIDGVKVEVPKNYTILQAAKEAGVDIPTLCYLKGINEIGACRICVVEVQGAKALQASCVAPVSDGMVVRTNTPVVREARKATLELILSDHDRSCLTCIRNGNCELQALANEFNISELRFEGARHQSEIDDLSASIVRNSNKCVLCRRCVSMCSNVQTVNAIGVNERGFRSVVSPIYGMSLADSPCINCGQCVISCPTGALYEKDHTARVWEALADPEKYVVAQTAPAVRVALGEEFGMPIGTRVTGKMVAALKRLGFDKVFDTNFGADLTIMEEGNELLHRLKNGGKLPMITSCSPGWVKFCEHYYPEFLDNLSTCKSPHQMLGAIIKSYYAEKMGIDPSKIYVVSIMPCTAKKFEIDRPEMEHDGLRDVDAVLTTRELARMIKEANINFNRL…	[FeFe] Group A3	[FeFe] Group A3	Bifurcating	Labile	4	[FeFe]-centre, 3 x [4Fe4S] clusters, 1 x [2Fe2S] cluster	NADH dehydrogenase, thioredoxin, thioredoxin	3.73698	5.61599	2.4187	1.80941	12.41	8.59822	7.97802	6.36604	9.79379	10.0476	4.56754	3.79621	0	0	12.8753	0	3.83277	1.29292	0	0	2.89209	8.16476	13.4772	0	2.16595	2.70282	0.967684	0	5.38008	2.01625	0.601135	6.44305	1.15221	0.526666	6.72404	0.932444	0	2.9653	7.57397	1.22702	9.17866
WP_004610270.1	MRGIYSSLTKIRRKVFVEVAKLAYEGNDYSRIEDLPYKIIPGEVATYRDSIFLERAIVGERLRLTMGLSLRPIDEPAPISKGIEESIIADKYYEPPLINIIKFACNKCEENKYEVSNGCQACLAHPCIEICPKNAISFKNGKAYIDQDKCIKCGLCKNNCPYDAILKKERPCAKACGMNAIESDEYGNAHINYDKCVSCGMCLVSCPFGAIADKSQIFQLIQAIKNGDEIIAAVAPAFIGQFGPKVTPEVLKKAMRELGFKDVVEVAIGADLCTIDEANDFLEKVPEKQPFMATSCCPSWSMMAKKEFPEFKSYISMALTPMVLTARLIKEKHPNSRVVFIGPCAAKKLEASRKSVRSEVDFVLTFEEVGAMFEAKGIDLSTLEADPNDSFTQASGDGR…	[FeFe] Group B	[FeFe] Group B	Evolving	Labile	1	[FeFe]-centre, 2 x [4Fe4S] clusters	None	17.1643	18.6938	10.8841	12.6658	20.1663	20.0625	27.6162	17.5066	19.0115	20.0953	12.7891	15.1848	25.7845	6.02146	15.5859	3.7695	30.6622	26.5048	5.29544	5.92253	9.2547	9.57248	6.73862	16.6476	18.8747	17.5683	6.77379	24.9506	18.5857	17.4741	8.41589	18.0405	53.0015	23.7	13.4481	10.2569	20.0806	23.7224	32.4599	17.7919	25.7003
WP_011735399.1	MTRFADTTVYINNRPVVMEGERNLLELIRKTGIDLPTFCYQSDLSVYGSCRLCLVEIEGRGIVGSCSTPPEAGMRVHTHTEEIRELRKIAIELFLANHDSNCPTCLKSDDCQLQNLARRLGVDAVRFQSVLVKKPIDNSSPAIIRDPNKCVLCGDCARMCSEIQGIGAIDFAHRGHDAAVLPAFGKKIGEVECVNCGQCTIVCPTGSLCLKPEMEEVWKSLTDKQTYTVAAIAPAVRVAIGEIFGMEAGAVSTGQMLAALKLLGFDQVYDVSFAADLTTIEEGSEFLERRSAGVRLPHFTSCCPAWVKYVEHFHPHLIGNLSTCKSPLQMFGALLKDRLPDLVQIPRERVKVVSITPCTAKKFEAKRPEFTHDGIPDIDHVITTIELGRMIKAAGIQFN…	[FeFe] Group A3	[FeFe] Group A3	Bifurcating	Labile	3	[FeFe]-centre, 3 x [4Fe4S] clusters, 1 x [2Fe2S] cluster	NADH dehydrogenase, thioredoxin	0.214362	0.11747	0	0	0	0	0	0	0	0	0.913509	0	0	0	0	0	0	0	0	0	0	0.422315	1.34772	2.08095	0.618842	0	0.967684	0	0	0	1.00189	0	0	0	1.34481	0	0	0	0	1.22702	0
WP_011879575.1	MPDNQDNHENKRKIHVSINDQELTVPEGITILEAAHEAGVKIPTLCHLDLHDFQLYNKTASCRVCMVELVDARNNRNKLVPSCVTKVQEGMMVRTDTIRAIQARRMAVELLLSNHPNECFTCPKNLECELQALADELNVRKIRWEGERMDYPKDMSSDAIVKDANKCIYCRRCETACNEVQTCGILSGIGRGFNAFVGPFANIPMVESSCTYCGQCVMVCPTAALTEVYHTDKVWEAINDPDKHVIVQTAPAVRVALGELFGMEAGTVVTGKMVTALKRMGFDEVFDTDFGADLTIMEEASELIYRLKNNKTLPILTNCCPAWVKFIEHQFPELIHVPSTCKSPHIMFGTIAKTYYAEKNGLDPDNIVVVSVMPCIAKKAEAKRPELTKDAHNNVDIVI…	[FeFe] Group A3	[FeFe] Group A3	Bifurcating	Labile	3	[FeFe]-centre, 3 x [4Fe4S] clusters, 1 x [2Fe2S] cluster	NADH dehydrogenase, thioredoxin	0.452642	0.557222	0	0	6.20501	0	0	0	0	0.913421	1.82702	1.89811	0	0	0	0	0	0	1.76515	0	0	0	2.69545	0	0	0	0	0.891093	0	0	0	0	0	1.58	0	0	0.608504	0	0	1.22702	0.917866
WP_022184401.1	MARSVIDPVTRIEGHLRVEMEVENGVVSDAWVSGGCFRGMELVVKDRTPEDAAHIVQRICGVCPVSHSHAATIAAEKAYGITISNNARIIRNLIEGAQFLHSHILWFYTLAALDYVNPLNALKANVGSAYDLVEAAGTSCQSDLKALQERLTKFAENGQLSIFSGNWWKNGQSDTEFKLPAELDLIATAHYIEALTMQSKASEVCALLGGKMPHVMTIVPGGTSFVPTEEKLDDLWSLVHELRDWIKATIIPDTKAIAPYYKEALSFGKGCGRYVAWGVFERPSFALADRYLPSGVIDENLKLSEVDTDLIKEYIGHSWYVGDSDLNPREGVTEPEFTEYYKAGTLREENGHEIGDINDRYSWSKAPSYDGKCMEAGPFSRVLAAYLRGNEFVKPAVDG…	[NiFe] Group 1a	[NiFe] Group 1i	Anaerobic Uptake	Sensitive	3	[NiFe]-centre, 3 x [4Fe4S] clusters	Cytochrome b	12.7703	12.7743	0	0.904703	0	0.573215	93.8951	1.59151	23.6203	0	0	0	2.57845	0	16.9412	0	0	0	1.76515	3.94835	13.8821	3.51929	14.825	0	6.49784	106.086	0	0	48.4207	0	3.80719	0	209.701	0	0	0	1.21701	4.94217	53.5588	10.4297	7.34293
WP_013788347.1	MFKFNTDVQMLKYEVLYNVAKLTLEDRLEDEYDEIPYEIIPGTKPRFRCCVYKERAIIEQRTKVAMGKNLKRTMKHAVDGEEPIIQVLDIACEECPIKRYRVTEACRGCITHRCTEVCPKGAITIINKKANIDYDKCIECGRCKDACPYNAISDNLRPCIRSCSAKAITMDEELKAAINYEKCTSCGACTVACPFGAITDKSYIVDIIRAIKSGKKVYALVAPAIASQFKDVTVGQIKSALKEFGFVDVIEVALGADFVAMEEAKEFSHKIKDIKVMTSSCCPAFVAHIKKSYPELSQNISTTVSPMTAISKYIKKHDPMAVTVFIGPCTAKKSEVMRDDVKGITDFAMTFEEMVAVLDAAKIDMKEQPDVEVDDATLFGRKFARSGGVLEAVVEAVKE…	[FeFe] Group B	[FeFe] Group B	Evolving	Labile	1	[FeFe]-centre, 3 x [4Fe4S] clusters, 1 x [2Fe2S] cluster	None	0.477884	0.439375	0.604674	0	0	0.573215	0	0	0.576106	0	0	0	0	0	0	0	0	0	0	0	0	0.281543	0	0	0.928262	0	0	0	0	1.34416	0	0	1.15221	3.68666	0	0	1.21701	0.988435	0.540998	0.613512	0
WP_013623612.1	MGERLTDLVNTHEEKCQGCNKCIRHCPVDANVAYADEEGKIKVKVQAELCINCGECIEVCDHEAREFYDDTEAFFADLKNGKKITVISAPAVRTNFEDYKKIFGFLKARGVEYIYDVSFGADITTWAYLKAIKEKKLTSVIAQPCPAIVGYVEKYKPGLLNYLSPIHSPMMCTAIYLRKYKKISSSIAFLSPCIAKKNEMEKTNGIISYNVTYKNIEKYMKDNGLAMNSFEDKDFDFIDLSLGFLYSRPGGLKENIEAVIDHAWVKQIEGTEIAYEYLDHYQERIHNQKPVPLVVDILNCSQGCNIGSAACADRKMIDDIDHKFNQMKTETIDKNTKGRLTKKFRWIGEKFDKELKLDDFVREYDKDGAVPAKRIPSDSEAEQIFKSMYKNDEAACNIN…	[FeFe] Group C	[FeFe] Group C2	Sensory	Labile	1	[FeFe]-centre, 2 x [4Fe4S] clusters, PAS domain	Fusion with methyl-accepting chemotaxis protein	25.7115	74.2994	23.5823	8.14233	24.82	7.45179	13.5013	14.3236	25.9248	10.961	21.0107	37.9621	0.644611	15.0536	42.6917	51.5165	15.3311	60.7672	24.712	43.4319	54.3714	47.8624	13.4772	31.2143	17.3276	11.487	37.7397	7.12874	6.84738	31.5879	33.4632	15.4633	13.8265	27.3866	37.6546	28.9057	6.08504	25.6993	5.40998	11.0432	22.0288
WP_028529172.1	MVTITINGKKMQVEEGTTILKAAAAAGMPVPSLCYLKEINEIGACRVCVVEVKGVARLVTACNNLVQNGMEILTNSPRVRQARRTNVELILSQHNSSCTSCVRGGNCSLQRIANDLGIYASEYTKVIPKKHWPVSFPLIRDSSRCIKCMRCLQICDKVQDLHVWDIAKTGSRATVGVSHNLQITEADCAICGQCLTHCPTGALRERDDTLKLLSAQGAFADPEKVTIVQVAPAVRAAWGEELGLTREEATPKRLVAALKALGFDYVFDTDFGADLTIMEEGSEFLERLNHRDDYKFPMFTSCCPGWVRFLKSQYPEMTGQLSTAKSPHQMQGAVTKTYIAEKFGIDADRIFNISIMPCIAKKQEAEIPNINDSGHGRDVDLVLTTREIARMIRADHLDV…	[FeFe] Group A2	[FeFe] Group A2	Evolving	Labile	2	[FeFe]-centre, 3 x [4Fe4S] clusters, 1 x [2Fe2S] cluster	NADH-dependent glutamate synthase	6.6442	7.14969	3.62804	5.42822	18.615	14.9036	11.0465	4.77453	4.03274	7.30737	6.39456	1.89811	7.09072	3.01073	5.42117	1.2565	0	14.2221	7.06058	3.94835	5.20577	7.17936	9.43407	6.24286	6.18842	15.5412	7.74147	4.45547	6.84738	3.36041	6.01135	9.66458	3.45662	4.21333	8.06885	5.59466	0.608504	16.8034	1.62299	15.9513	4.58933
WP_002849014.1	MRSCLTLKKSNCKNCYKCIRYCPVKSIRFSGNQAHIIEQECILCGQCVVVCPQDAKQIVDESEKVRVLLQSGSPVVVSLAPSFIANYDGAGIEQMRDALKKLGFYDVEETAVGATHVKREYERILKEENRDVVISSCCHSVNLLIQKYFPDLLPMLADVISPMQAHCADIKRRIHDAKTVFIGPCVSKKDEAQHYGDTVDAVLTFEELSVWLKEENIEIERGFSADENSRARFFPTAGGILKTMDCDLPDYTYIAIDGIEKCISVLRELEKGSIHKCFIEMSACKGSCIGGPVMENARYTPVEDQMLIARYAGSKDYDVEQPDKLYMKKQFTLIDLGHAQPTEPEIHQILAQMGKFDTSDELNCGSCGYNTCREKAIAIYQGKADISMCLPFLKDKAES…	[FeFe] Group C	[FeFe] Group C3	Sensory	Labile	3	[FeFe]-centre, 2 x [4Fe4S] clusters, PAS domain	Phosphatase, thioredoxin	13.0328	14.4295	9.07011	12.6658	44.9863	17.7697	4.29586	7.95755	14.4026	46.5845	10.9621	5.69432	13.5368	0	28.4612	0	7.66555	5.81813	1.76515	1.97418	9.2547	13.3733	56.6044	2.08095	39.2964	10.8113	13.5476	8.01984	12.7166	18.1462	3.20605	6.44305	2.30441	2.10666	10.7585	7.45955	9.73606	16.8034	1.082	47.854	3.67147
WP_025863484.1	MKMVTLTIDNKTVEVPKGTTVLEAAAKVGVEIPTLCHMKLDNLEIENKPGGCRVCLVEIQGRKNLAPSCVTEATDGMVIKSSSIRVINTRRTIVELILSDHPAECLTCAKSGNCDLQSLAIKMGIRELHFSGEKSVHREDKSPAIIRDMDKCIMCRRCETMCNEVQTVGVLSAINRGFNSVVSPAFEQDLQDSACTYCGQCVAVCPVGALTERDQTGAVIRALSNPDKTVVVQTAPAVRAALGEEFGQEAGTLVTGKMAAALRRLGFNYVFDTDFAADLTIMEEGTELLDRLTRHLNGDSTVKLPILTSCCPAWVKFIEHNFPSLLDVPSTAKSPQQMFGAVAKNYFAEKLNVDRKKLVVVSIMPCVAKKYERGRDEFAVDGNSDVDFVLTTRELSHLI…	[FeFe] Group A3	[FeFe] Group A3	Bifurcating	Labile	3	[FeFe]-centre, 3 x [4Fe4S] clusters, 1 x [2Fe2S] cluster	NADH dehydrogenase, thioredoxin	0.565795	0.738673	0	0	1.55125	1.71964	0	0	0	0	0.913509	0	0.644611	0	1.35529	0.62825	0	0.646459	0	0	0	0.281543	1.34772	0	0	3.37852	0	0	0	0.672082	0.200378	0	0	0	0	0.932444	1.21701	0.988435	0	0.613512	0
WP_013314154.1	MKTITATINGIKVEVPEGTSILDAAKKMQVKIPTLCHHPDLPAWGACGICVVKVAGSPKMLRACATPLEDGMEVITHDPEIVQVRKTVIELILSTHPDDCLYCPRNQNCELQRLAAEFGVREQPYEKNIVELPKDTSTPSLVLDPSKCVKCGRCVNVCQGMQNVWALEFLGRGDGTRIAPAGDIALNDSPCIKCGQCSAHCPVGAIYEKDDTRRVWEAIMDPEIHTVVQIAPAVRVAIGEAFGYEPGTLLTGKTYAALRRLGFDAIFDTNFGADLTIMEEASEFVERFAHGKGPIPLITTCCPSWVDYLEKYYPEMIPHFSSAKSPQMMLAAMVKTYYAQKKGIDPSKIFMVSVMPCTSKKYEIERDENMYSSGYKDQDASITTRELARMIKSAGIDFH…	[FeFe] Group A3	[FeFe] Group A3	Bifurcating	Labile	3	[FeFe]-centre, 3 x [4Fe4S] clusters, 1 x [2Fe2S] cluster	NADH dehydrogenase, thioredoxin	0.399427	0.406203	0	0	0	0	0	0	0.576106	0	0	0	3.22306	0	0	0	0	0	0	0	0	0.422315	0	4.16191	1.23768	1.35141	0	1.78219	0	0	0	0.644305	0	1.58	0	0	0	0	0	0	0.917866
WP_021433568.1	MGDNKSTIIQSSLGSVFTVFSEEELKQITDSSRKIAISGKINNPGIIEVPESATLKDIIDLAGGIIKNRDFKAAQLGIPFGGFLTEDSLDKELDFTLFNSECSRTIIILSQEDCIVQYAKFYIDFLMGKMKDDKFKKYAKVKNEIMEMWKILDRISKGRSNMRDIFILRELANEVKNTLNQKHNIMQEIIDKFYGEIEEHIEDEKCYTAQCNNLVKLTITGKCIGCGACKRACPVDCIVGERKEQHYIDYNRCTHCGQCIASCPVDAITAGDNTLKFLRDLATPNKIVITQMAPAIRVAIGEAFGFEPGTNVEKKIAAALRKLGVDYVFDTTWAADLTIMEEAAELQERLEKHFAGDEDVKLPILTSCCPAWVKFIEQNYGDMLDVPSSAKSPMQMFAT…	[FeFe] Group A1	[FeFe] Group A1	Evolving	Labile	1	[FeFe]-centre, 2 x [4Fe4S] clusters	None	2.88167	9.30253	4.23272	1.80941	0	1.14643	2.45477	42.9708	0.576106	2.74026	0.913509	1.89811	2.57845	6.02146	0.677647	0.62825	0	0	1.76515	1.97418	2.89209	0.281543	0	0	0	0	0	0	0.978197	2.01625	0	0	34.5662	5.79332	1.34481	1.86489	11.5616	11.8612	0	1.84054	0
WP_015518171.1	MDKKLRKFDTKVQYLKYKVLREVARHAWTTEGTEKPADSFSFFNDVAKKIVKDKPTMRCCIYKERAIVSERIKIAMGGDPTNPNVIEVIDIACDECPVGGYDVTEACRGCIAHRCEDVCRMGAITFDEHQKAHIDKSKCVNCGQCAKVCPYGAILEFKRPCERACKIGAISRATDTSSAAAHIDNDKCISCGACVYTCPFGAISDKSYIVDIIETLKGSDNSKNYKVYAVVAPSIASQFSYAKLDQVVTAIKQLGFHSVVEAALGADMVAYKESKELAEKGFLTSSCCPAFVMYIEKAFPTMTDKISHNLSPMAEIAKYIKDSDPTAKVVFIGPCTAKKMEVQWDKVKPYVDYAMTFEELQAIFDSKDIEVSELEGTVLDNASYYGRIFARCGGLADAV…	[FeFe] Group B	[FeFe] Group B	Evolving	Labile	1	[FeFe]-centre, 3 x [4Fe4S] clusters, 1 x [2Fe2S] cluster	None	45.2494	52.0165	28.4197	60.6151	31.0251	49.2965	11.6602	28.6472	27.077	63.026	52.07	5.69432	17.4045	21.0751	270.381	1.2565	68.9899	16.8079	17.6515	5.92253	19.6662	51.9448	17.5204	2.08095	118.508	42.5693	29.0305	56.1389	42.0625	81.3219	19.6371	36.0811	3.45662	3.68666	13.4481	16.784	11.5616	44.4796	7.57397	101.843	16.5216
WP_021800870.1	MNKVVINEKIVEFNEATTILKLAGENGIDISTLCFLDDCNEIGNCGVCVVEIEGRDELATSCTTYVEDGMVINTNSEKVQNAVKDRISTLLDKHEFKCGPCKRRENCEFLKLVIKHKARASKPFIVADKTPYVDDRSKSIVIDRTKCVLCGRCEAACEKKTGTGSIKLVDNGDGLKVTTTENKCFDDTNCILCGQCVAACPVDALSEKSHMERVKEALADPEKHVIVAMAPSVRTAMGELFKMGYGVDVTGRLYTSMRKLGFDKIFDINFGADMTIMEEATELAQRLENNGPFPMFTSCCPAWVRQVENYYPEFLDNISTAKSPQQIFGTASKTYYPKLEGLDPKNVFTVTIMPCTAKKFEADRPEMEYEGLRNIDAVITTREFAKMIKDAKIDFANLE…	[FeFe] Group A1	[FeFe] Group A1	Evolving	Labile	1	[FeFe]-centre, 3 x [4Fe4S] clusters, 1 x [2Fe2S] cluster	None	0.117278	2.47477	0	0	0	0	0	0	0	0	0	0	0	0	0	5.65425	0	0	0	0	0	0.140772	0	0	0	0	0	0	0	0	0	0	0	0	0	0	0	0	0	0	0
WP_027406274.1	MPEAILMAAEKMSDGGKHPLTAMFGRDETATGVGYVIYCYFEIPEEKTVDGFKVVFNPNGSLEYDSITHVVPAAAWYEREIKDMFGLVPKGHPDLRPLVLHETFPEDFFPLRKNVKVNAKVRGERQFKVRTAKGEGLFEVPVGPIHAGIIEPGHFRFSQAGEAMLQLDAKLFYTHRGIEKAVEGKIPYEALPIVERICGACSIANTWSFCQAVEKTVAVKVPRRAEIIRTLLMELERITNHVGDIGNIPAGVGFNPAISLGGRLKEKLMRLNETVAGNRFLRGMIIPGGVAKDITFELCENIHQVMDEVADGVEDMATMFREQENFQNRVQTTGIVRNQTAIDLAMVGVGARASGYAHDSRSDFSYGVYDELDFKPYTKSMGDVAARLLVRIGELSASF…	[NiFe] Group 4f	[NiFe] Group 4f	Evolving	Sensitive	6	[NiFe]-centre, 1 x [4Fe4S] clusters	NuoL, NuoH, two antiporter subunits	0.20417	0.0766412	0	0	0	0	0	0	1.15221	0	0.913509	0	0	0	0	0	0	0	0	7.8967	0	1.26695	0	0	0	0	0	0	0	0	0	0	0	0	0	0	0	0	0	0	0
WP_013824004.1	MGMSTGKVTVDGHVVEINDARNILEVVRRAGIKLPTFCYHSELSVYGACRMCMVEVEGRGLVASCSTPPADGMVIHTSTPRTRRLRRMIIELLLANHDRECTSCGRSGSCKLQQLARQMGVTEVRFGQRDKKMPVDNTSPALVKNPNKCILCGDCVRMCKEVQGLGIWDFAFRGSKTQVTTAFGKPLQEVACVSCGQCVAVCPTGALTVKSEVDKVWDAIHDPDKVVVVQVAPAVRVAIGEEFGLLPGEKATGQMVAALRKIGFDRVFDTLFTADMTTIEEGMELLGRLEKGGRLPLFTSCCPAWVKYAEQFHADLLENLSTCRSPQQMFGSLVKKHYAREIGRSPEQVVCVSVMPCTAKKFEARRPEFTTGGVPDVDFVLTTMELAQMIKEAGIVFNE…	[FeFe] Group A3	[FeFe] Group A3	Bifurcating	Labile	3	[FeFe]-centre, 3 x [4Fe4S] clusters, 2 x [2Fe2S] cluster	NADH dehydrogenase, thioredoxin	0.276296	0.129501	0	0	0	0	0.613694	0	0.576106	0.913421	0	0	0	6.02146	0	0	0	0	0	0	0	0.703859	0	0	0	0	0	0	0	0	0.200378	0	2.30441	0	0	0	0	0	1.082	1.22702	0
WP_028109440.1	MTATTYQAGEIQGLIEIDASKCKGCDACKKFCPTQAIVGASGAAHSIDKDRCLSCGQCMINCPFGAIKETHSALDTVIRKLADKDTTVVGIIAPAVRVAIGEEFGLGTGELVTGKLYGAMNKAGFKIFDCNFAADLTIMEEGSEFIHRLHATVKGEEHAGALPQFTSCCPAWVRYLEGNFPSLLPNLSTAKSPQQMAGTVAKTYGAKVYDMEPEKIFTIAVMPCTAKKVEASRPEFNSAWHYNHEHGAHAAEYPDVDAVLTTREMAQLLKLLKIDLATTPAYEGDSLFAQYTGAGTIFGTTGGVMEAALRTAHKVLTDTEMAKLDLEPVRGLEGVKEADVTLFDKQLGQEVTVKVAVVHDMGNNIEPILRDVAAGTSPYHFIEVMNCAGGCVNGGGQPV…	[FeFe] Group A1	[FeFe] Group A1	Evolving	Labile	3	[FeFe]-centre, 2 x [4Fe4S] clusters	Small subunit, cytochrome b	0.209455	0.18295	0	0	0	0	0	0	0	0	0	0	0.644611	0	0	0	0	0	0	0	0	0.140772	0	0	0	0.675704	0.967684	0	0	0	1.00189	0.644305	0	0	0	0	0	0	0	0	0
WP_013708979.1	MADMMRGAYTGLAEIRRMVFREVAKLAYADADDDADYRWVDELPYRIIPGDVATYRESVFLERAVVGERIRLTMGLPLQDVDRPARLSEGVAAAARPETYYQPPLINVIKFACNACEEECYEVTNMCQGCLAHPCREICPTGAVTFVDKKAHIDKDACINCGRCASICPYTAIAHRERPCAAACGMNAIASDEWGRAEIDYDRCVSCGQCLVNCPFGAIADKSQIFQVIQAITTGDEVIAAVAPAFVGQFGGRGNVDKLREAFLRLGFCGMEEVAIGADLCTVQEAEYFVDEVPDKLPFMGTSCCPAWSVMAKREFPEHAQCISMALTPMVLTARLIRERHPDAKIVFVGPCAAKKLEARRTSVKSEVDFVLTFEEMAGMMEAKEIDYRQLSGDGSTDF…	[FeFe] Group B	[FeFe] Group B	Evolving	Labile	1	[FeFe]-centre, 2 x [4Fe4S] clusters	None	2.88017	3.08406	1.20935	4.52351	0	2.29286	6.75063	9.54906	2.88053	0.913421	0.913509	3.79621	0.644611	3.01073	2.03294	0	7.66555	7.11105	1.76515	0	1.73526	1.68926	2.69545	4.16191	1.5471	2.02711	0.967684	2.67328	2.44549	7.3929	1.8034	2.57722	0	3.15999	0	2.79733	9.12755	4.94217	5.40998	1.22702	5.5072
WP_012543947.1	MDKVTVTIDGITLEVPSNYTVLQACREAGIDIPTLCYAEVINEIGSCRLCVVEVDGVRNLPASCIYPVQNGMNIRTNTPRVREARRVNLELILSNHDRSCLTCIRNTKCELQDLAERFGITDIEFQGENVNYPLDDASPAIVRNPNKCVLCRRCIAECQEVQNVFAIGAVNRGFDTLVSAPFYVSLNDSPCISCGQCITACPTGALYEKDHIQRVYRALADKRKHVVVQTAPAVRVALGEEFGMPVGSIVTGKMVAALRRLGFEVVFDTDFGADLTIMEEGSELIERLKYGGKLPMITSCSPGWINFCEKYYPDFVENLSTCKSPHMMLGALIKTYYAEKMGWNPEDVYVVSVMPCTAKKVEIERPENMHDGLQDVDAVLTTRELARMIKEAGIDFVNL…	[FeFe] Group A3	[FeFe] Group A3	Bifurcating	Labile	4	[FeFe]-centre, 3 x [4Fe4S] clusters, 1 x [2Fe2S] cluster	NADH dehydrogenase, thioredoxin, thioredoxin	0.758031	0.645069	0	0	0	2.29286	4.29586	0	0	1.82684	0	7.59242	0	0	0	0	0	2.58584	1.76515	0	0.578419	0.703859	0	0	1.23768	0	0	2.67328	0.489098	0	0.200378	0	0	0	0	1.86489	0	0.988435	0	0	0
WP_005836589.1	MAFTSNIMIVRHRLLKELVKLWNNNELVDKIDRLPIELSPRRSKHAGRCCVHKERAVWKYKSLPLLGLDMEDETDELTPLSEYAARALDRAENGRPKDNIMCVIDEACSACVQINYEITNLCRGCTARSCQVNCPKKAVHVKESGQAWIDHDACISCGICHKSCPYHAIVYIPVPCEEACPVKAISKDEKGIEHIDESKCIYCGKCLNACPFGAIFEISQVFDVLHRIRKGEQVVAIVAPSILGQFKTTIEQVYGALKQVGFTDVIEVAQGAMDTVSNEAHELIEKLEEGQKFMTTSCCPSYIELVNKHIPAMKPYVSGTGSPMYYAARIAKEKYPDAKVVFIGPCVAKRKEAQRDEAVDFIMTFEEVASVLAGLDIQMEQAQPYSMSFTSVREAHGFA…	[FeFe] Group B	[FeFe] Group B	Evolving	Labile	1	[FeFe]-centre, 3 x [4Fe4S] clusters, 1 x [2Fe2S] cluster	None	33.1262	67.6653	33.2571	0	17.0638	27.5143	5.52324	36.6047	20.1637	0.913421	21.9242	24.6754	28.3629	138.494	23.04	1.2565	160.976	33.6159	33.5378	3.94835	8.09786	9.29093	2.69545	6.24286	48.8885	58.1105	57.0934	11.5842	21.5203	19.4904	0	0	3.45662	0	0	28.9057	0	34.5952	0.540998	9.20268	3.67147
WP_023920491.1	MGYMTINNRRVAFTDEKNVLSVIRKSGIDLPTFCYHSELSTYGACRMCVVEDERGKVFASCSEVPRDGMVIYTNTPRLQHHRKMIIELLLSSHCRDCTTCAKNGVCTLQKLASQLGISEIRFENHKKPLPLDTSSDCVIRDPNKCILCGDCVRTCDEIQGLGILDFAFRGSKMQVMPAFNRELAETDCVGCGQCRAVCPTGAISIRQDVDPVWKALADKNIRVVAQIAPAVRVAIGDKFGIPKGENTLGRLVAALRHMGFDEVYDTNFGADLTVMEESAELLERLKSGKNLPLFTSCCPGWVKFCENRYPEFRENISTCRSPQAMFGALLKEEARMKEAEAEKEGRSLRKTVVISIMPCTAKKAEIKRPEHFTEGQQDVDYVLTTTEVTRMIKEAGIDL…	[FeFe] Group A3	[FeFe] Group A3	Bifurcating	Labile	3	[FeFe]-centre, 3 x [4Fe4S] clusters, 1 x [2Fe2S] cluster	NADH dehydrogenase, thioredoxin	28.3168	33.3509	10.2795	9.04703	60.4989	47.0036	68.12	9.54906	13.2504	16.4416	3.65404	13.2867	70.9072	87.3111	16.9412	8.16725	11.4983	44.6057	93.5527	21.7159	39.9109	36.4599	56.6044	20.8095	4.95073	17.5683	12.5799	26.7328	12.7166	17.4741	3.40643	11.5975	9.21764	1.58	10.7585	18.6489	12.1701	13.8381	28.1319	17.1783	25.7003
WP_013643876.1	MNENNKITEKNVIETEVTMGPVHSAAIEPYRVRLFVEDEMVKDAEITVGVNHRGIERIMEGLPVEKANSLTEKICGICSNSHIWNSVLVAEKAIGIDVPERAQYIRVIMEELERLHSHLLYLAHGNEVLGHETFAMRIFYIRETVMELLRMIGGNRVQYGASIIGGVRPRCELDAMRIQKISEGMDIIEEKILDFADRFVSDPMIMSRITGVGVLTRKQAIELAASGPTLRSTGVETDVRTEMEAYEPFDFNVITQDDGDVKSNLLMRVLEIPEAINIIRQAIKHLPDGKITNRSWDMQDAPITKSYIEVPRGKLYHSYALEDGRVRNSIVRTPSITNIGAMQYAAVGHHITDAQLAIVQCDPCFTCTDRAIQIIKI	[NiFe] Group 4d	[NiFe] Group 4i	Evolving	Sensitive	16	[NiFe]-centre, 1 x [4Fe4S] clusters	NuoH, NuoL, polyferredoxin, nine TM proteins, two hypotheticals	0.0740662	0.076114	0	0	0	0	0	0	0	0	0	0	0	0	0	0	0	0	0	0	0	0	0	0	0	0	0	0	0	0	0	0.644305	0	0	0	0	0	0	0	0	0
WP_013780878.1	MDEKMVTLTIDGQKVTVPAYYTILEAARSANIRIPTLCFLKDINEIGACRMCIVEIKGAKALQASCVYPVADGIEVSTNSPAVRDARKVTLELILSNHDRSCLTCVRNRNCELQQLADELNIKEIPFEGERLTLPIDDLSPAIVRDPNKCILCRRCISTCRNVQEIGVIGATERGFNTMVEPPFKMSINQVPCINCGQCIEACPVGALREKDDTERVWTALADPELHVVVQTAPAVRAALGEEFGMPIGTRVTGKMAAALRRLGFDKVFDTDFAADLTIMEEGTELLDRLKNGGKLPLITSCSPGWVKYCEHYYPEFLDNLSSCKSPHEMMGAVLKSYYAQKMNIDPSKIFVVSVMPCTAKKFEAQRPELAANGHPDVDVVITTRELARMIKEAGINFL…	[FeFe] Group A3	[FeFe] Group A3	Bifurcating	Labile	4	[FeFe]-centre, 3 x [4Fe4S] clusters, 1 x [2Fe2S] cluster	NADH dehydrogenase, thioredoxin, thioredoxin	2.55502	2.68948	3.62804	1.80941	3.10251	11.4643	0.613694	3.18302	0.576106	4.5671	2.74053	3.79621	1.93383	0	2.71059	0	0	0.646459	0	0	0	2.81543	6.73862	0	2.78479	2.02711	1.93537	1.78219	2.44549	2.01625	0.200378	3.22153	0	3.15999	1.34481	6.5271	0.608504	4.94217	0.540998	6.74863	1.83573
WP_028830146.1	MKGIFSDIINYRRKVFAEVADFAYGDKDLSELPKSVFNIIPGEEARFRTDVFKERAIVGERIRLAMGLDIRDAATFGLISDGIENVDVDKRIYEPPLVNVITFACEACPTKTYEVTSNCRRCIGHPCQNVCPVNAITINKKQAVIDKEKCIKCGKCKDICPYGAIIKYDRPCAEACGVNAIESDSLGRAKINYDKCVSCGQCMQACPFAAIGDKSQIYQLVKAIRNQENMYAIVAPAFVGQFGPIANPTQIFEAIKRLGFKEVLEVGIGADIGTIHEAEEFLDEVPNKVPYMGTSCCPAWLSMVQKMFPDQARYISDTSTPMIATAQFIKKNNEDAKVVFIGPCIAKKLEALGEKVHKYVDFVITFEELMGLFVSRGIEVSEIEVDYKIQDASKLGRGF…	[FeFe] Group B	[FeFe] Group B	Evolving	Labile	1	[FeFe]-centre, 2 x [4Fe4S] clusters	None	0.358838	0.282698	2.4187	0	0	0	0	0	0	0	0.913509	0	0	0	0	0	0	0	0	0	4.04893	0.422315	1.34772	0	0	0.675704	0.967684	0	0	0	0	0.644305	0	0.526666	2.68962	0	0	0	0	0.613512	0.917866
WP_013277223.1	MIKLKINNEEIEVEEGTTILKAAEELGYKIPTLCYQEDLSITGSCRICVVEIKGQQKLVPSCATAVEEGMEIITNSEEVKQVRRDIFELIIANHPFDCKLNCLTCARHGDCELQEVAQVIGVEEIEYEFIEKEWDTDTTSPSVMRENTKCITCGRCVKTCEEIQHAGVLTLTNRGPATEVSTFMDKGMGNVDCTNCGQCLTACPTGAIHEVYRINEVISALHDPDKHVVVQTAPAVRVALGEEFDMESGINTEGKMVTAMKKMGFDKVFDTNFTADLTIMEEGFEFIDRLKNDGPLPLITSCSPGWIKFAEHNYSDLLDNISSCKSPQQMFGALTKSFYPEKVDVDPADVVSVSIMPCTAKKFEAEREEMTDTGYQDVDHVLTTRELAEMIKEYGLNFV…	[FeFe] Group A3	[FeFe] Group A3	Bifurcating	Labile	3	[FeFe]-centre, 3 x [4Fe4S] clusters, 1 x [2Fe2S] cluster	NADH dehydrogenase, thioredoxin	0.197841	0.139524	0	0.904703	0	0.573215	0.613694	0	0	0	0.913509	0	0	0	0.677647	0	0	0.646459	0	0	0	0.422315	0	0	0.618842	0	0	0	0	0.672082	0	0	0	0	0	0	0	0	0	0.613512	0.917866
WP_003512576.1	MSPYFHSVTLDEVKCKGCTNCIKRCPTEAIRVRKSKARIINERCIDCGECIRVCPYHAKKAITDPIGLINDYKYKVAIPAPSLYGQLKSAPSRDHILTALKMCGFDDVFEVARAAEIITSETKKILAQQRFEKPLISSACPAVVRLIQVRFPNLIDNILKLKSPMEVAAKIAKDEISRNRKIRQEDIGVFFITPCAAKVTSIKAPLDKEKSFVDGAISISEIYLKILSALGKIDKPEKLSRAGFVGVRWANSGGESIALGTDKFLAVDGIHNVIAILEEIEDEKLEDIDFVEALACQGGCLGGPLNVENMYVARKTIKKFIDDAKEKGLETAADENCNYDIAWTGKVEYKPVMKLDKDFDVAMKKLETLNVINSGLPGLDCGACGAPSCRALAEDIVRG…	[FeFe] Group C	[FeFe] Group C1	Sensory	Labile	2	[FeFe]-centre, 2 x [4Fe4S] clusters, PAS domain	Histidine kinase	1.24576	1.43944	1.20935	1.80941	3.10251	3.43929	0	0	1.15221	1.82684	3.65404	0	1.93383	0	0	0	0	0.646459	0	0	0	1.12617	0	0	1.85652	0.675704	0.967684	4.45547	0.978197	2.01625	0.200378	0	0	0.526666	0	0.932444	1.82551	0	0	0.613512	0
WP_005980462.1	MRMIRLKIDGKIVLAPEGTTILNAALKAGIHIPHLCYMQMDDIGYKNNCASCRVCVVEVKGMNRLLPSCTTPIVEGMEVVTNSLQVMQKRRMVVELMLSDHPKDCLICGKNGECELQKLAISFGLREMRFEGKEAVHDMQHSISITRDITKCIMCRRCETMCGDIQTCGILTGIDRGFNVVVNTAFNRNLIETDCTFCGQCVAVCPVGALYETDNSFKLSRDLINPNKKVIVQVAPAVRVAIGELFGIPAGTNSTGKMVTALKKLGFDGVFDTNFAADITIMEEATELKHRLDDYLAGKQDVKLPLYTSCCPSWVRFAELNFPEILDNLSTTRSPQQIFGSLAKHVWAEKMGIDKKDLVCVSIMPCISKKYEASREEFTVEQNPDVDYSLTTRELGRIL…	[FeFe] Group A3	[FeFe] Group A3	Bifurcating	Labile	3	[FeFe]-centre, 3 x [4Fe4S] clusters, 1 x [2Fe2S] cluster	NADH dehydrogenase, thioredoxin	0.137469	0.0500466	0	0	0	0	0	0	0	1.82684	0	0	0	0	0	0	0	0	0	0	0	0.281543	0	0	0.309421	0.675704	0	0	0	0	0	1.28861	0	0	0	0	0	0.988435	0	0.613512	0
WP_009380768.1	MNSADDFRSGQSLRREPSRQGMKFMVERNHINVLRREVLRRVAESFLHDADFGKSVERIPFVMRPKNTKPSRCCIYKDRAILRFRVMAALGFRLEDEEDDSTPLSVYAEKALEREQPSAPILTVCDTACQGCIPARYYVTDACQNCIAHPCIGSCHFGAIQHIKGRSYIDPEKCRNCGMCHDACPYQAIVRLSVPCEDACPVKAIHKGENGRAEIDITKCISCGRCMRACPFGTVIERSEIVDVLSAMKAGKHLTAMMAPAIVGQFPGNLKRVVEALRELGFSEVLEVASGADVTTKREAAEFVERMKHGERFMTTSCCPGYVEAVRLHLPEMAPFVSSTSTPMHYCAEIAKERFPSTTTVFIGPCVAKRREALYDPIVDYVLTFEEVGALLEAKNIDV…	[FeFe] Group B	[FeFe] Group B	Evolving	Labile	1	[FeFe]-centre, 3 x [4Fe4S] clusters, 1 x [2Fe2S] cluster	None	1.64784	1.71487	0	2.71411	0	0.573215	0	0	1.72832	1.82684	2.74053	1.89811	5.15689	9.03219	0	1.2565	0	4.52521	3.53029	0	0	0.281543	0	0	0	4.72993	0	0	0.978197	0	0.200378	0.644305	0	0	0	1.86489	0	0	0	0	0
WP_027129041.1	MINFSSIGSIFSNIAGPELKKALSQGRNVVAISGMVVKPGVYDILETTTLSELIEMAGGITGHKKFKAAQFGLPFRNLVQEDYLDKPIDLELFEDGSTRNIIILSEEDCMVSFSKFYLEYLLANKQRRGYLEYSKVENEMERSWRTLDRISKGKGNIRDLFLLRQLCGAIKDTLGRKRNLVLESLDKFYHEFEEHVENKTCPAGQCIQLLQFKITDKCIGCTACARACPVGCISGSIKQKHTIDNDKCTHCGQCVIACPVGAIFEGDHTTQLLRDIATPNKIVVAQIAPAVRVAIGEAFGYEAGENVEKKLVAALKAIGIDYVFDTSWAADLTIMEEAKEFQERLEKYYEGDPNVKLPILTSCCPAWIKFFEQNYPDMLDVPSTVKSPMEIFSTVAKDI…	[FeFe] Group A1	[FeFe] Group A1	Evolving	Labile	1	[FeFe]-centre, 2 x [4Fe4S] clusters	None	0.308321	0.320334	0.604674	0	0	1.14643	0	0	0.576106	0	0	0	0	0	1.35529	3.14125	0	0.646459	0	1.97418	0.578419	0.140772	0	0	0.309421	0.675704	0	0.891093	0.489098	0	0	1.93292	0	0	0	0	0	0	0	1.84054	0
WP_005941255.1	MEEQQITLQIDHHFITVPAGTTLLEAARKIGIDIPTLCHINLKGTCIKNNPASCRICVVEVEGRKNLAPACATRCTDGMVVRTSTLRVMNARKIVAELILSDHPNECLTCPKSGNCELQNLALRFNIREMPFNGGELSPRKREVTSSIVRNMDKCIFCRRCESVCNDVQTVGALGAIRRGFNTTIAPAFDKMMTDSECTYCGQCVAVCPVGALTERDHTNRLIEDLSNPDKIVIVQTAPAVRAALGEEFGLPAGTLVTGKMVYALRELGFNYVFDTDFAADLTIMEEGSEILNRLTRYLNGDRSVRLPILTSCCPAWVNFFEHQFPDMLDIPSTARSPQQMFGSIAKTYWAEKMGIPREKLVVVSIMPCLAKKYECDRDEFKTNGNPDVDYSISTRELA…	[FeFe] Group A3	[FeFe] Group A3	Bifurcating	Labile	2	[FeFe]-centre, 3 x [4Fe4S] clusters, 1 x [2Fe2S] cluster	NADH dehydrogenase	10.4245	11.9584	0	2.71411	1.55125	1.14643	0	15.9151	19.5876	0	0	47.4526	48.9905	6.02146	14.9082	0	0	3.2323	0	0	5.78419	53.634	0	0	1.85652	4.72993	0.967684	1.78219	1.4673	4.03249	1.60303	0.644305	1.15221	0	0	2.79733	0	0	0	14.1108	0.917866
WP_011189620.1	MYFKSYHSTINHEVLNLITKAFFSDDFAGNVNAIPIQMRPRDQKASSRCCIWRERAIIRYRCMAFLGFAIEQDDDELKSLAEYAEMALKRDSVTSTTLTFIDEACNACVRTHYEVTNACQGCLAQACIQSCPKDAITMVQGKSHIDSNLCINCGKCLKVCPYHAIVQIPIPCEVACPIGAISKDVSGRQVIDYDLCIFCGKCMAQCPFAAVLEKSQMLDVLKAMRSGEKLVAMVAPAIAGEFDASMAKLVTALKKIGFAQAAEVSSGADITAHKEAEEFVERMEEGAPFMTTSCCPAYTMLVRKHLTDLGEFVSDTRTPMHYTAAKVKAVDSNYKTVFIGPCVAKRKEGARDEGVDYVLTFQELGSLFAALEIDFEQCEDGEYMFPAMREGRSFPVTGG…	[FeFe] Group B	[FeFe] Group B	Evolving	Labile	1	[FeFe]-centre, 3 x [4Fe4S] clusters, 1 x [2Fe2S] cluster	None	0.135751	0.0479168	0	0	1.55125	0	0	0	0.576106	0.913421	0	0	0	0	0	0	0	0	0	0	0	0.140772	1.34772	0	0.618842	0	0	0	0	0	0	0	0	0	0	0	0	0	0.540998	0.613512	0
WP_013708694.1	MVKLTIDGRDVEVAEHTTILEAALAAGIRIPTLCYLKNLNEIGSCRVCVVEVEGIDQLVAACNNYVLDGMVVHTNSPSVRIARKVNVEFLLSQHDSECTSCVRSGNCSLQTLSNDLGIAQLPFDKHLAGEHWNLSFPLIRNNDKCIKCMRCIQVCDKVQATGVWDITNRAGHTMVNTVGGKPIEETGCSLCGQCITHCPVGALRERDDTEQVFDALGDPERICLVQIAPAVRTAWGETFGLAPGQATVERLAAALRMVGFDYIFDTSFSADLTIMEEASELLERLKRAGESGEHPTFPMFTSCCPGWVRYVKDHYPELVDQLSTSKSPQQMFGAIAKTYYAQALGVDPSKIFSVSIMPCVAKKAEAALPSMTGADGAPDVDVALTVREVCRMVKACHID…	[FeFe] Group A2	[FeFe] Group A2	Evolving	Labile	2	[FeFe]-centre, 3 x [4Fe4S] clusters, 1 x [2Fe2S] cluster	NADH-dependent glutamate synthase	1.88964	3.20792	0.604674	0.904703	0	2.29286	2.45477	0	2.30442	1.82684	2.74053	1.89811	7.73534	0	2.71059	2.513	0	1.93938	1.76515	0	0	1.9708	1.34772	0	1.85652	2.02711	0.967684	4.45547	1.4673	0.672082	0.601135	5.15444	0	0.526666	4.03442	0.932444	0	12.8497	1.62299	3.06756	2.7536
WP_015943803.1	MKEVTKQQRIRVTVNGRQMEVYGDLTILQALLQEDIHIPHLCYDIRLERSNGNCGLCVVELGEGSEQQDVKACHTPIQEGMIIHTNSPRLEHYRKIRLEQILADHNADCVAPCVMTCPANIDIQSYLSHAGNGNFETAIKVIKERNPFPIVCGRVCPHSCEAQCRRNLIDEPVAINHVKRFIADWDIAHEQPWAPRKKAATGKKIAVVGAGSSGLSAAYYSAIQGHDVTVFERHPRAGGMMRYGIPEYRLPKETLDREIGLIADLGVKIMTNKALGTHIRLEDLHQDFDAVYLAIGSWRATPLQIEGDNLEGVWLGINFLEQVTKGADIKLGEHVVVIGGGNTAIDCARTALRKGAGSVKLVYRRTREEMPAESYEVEEAIHEGVEMYFLTAPHKIVAE…	[FeFe] Group A1	[FeFe] Group A1	Evolving	Labile	1	[FeFe]-centre, 3 x [4Fe4S] clusters, 1 x [2Fe2S] cluster	None	4.86934	6.17685	1.20935	7.23762	7.75626	7.45179	2.45477	3.18302	8.06548	4.5671	3.65404	9.49053	6.44611	0	0	2.513	0	10.9898	0	1.97418	1.73526	6.05318	4.04317	6.24286	4.64131	6.08133	6.77379	2.67328	6.35828	4.03249	5.61059	3.86583	12.6743	4.21333	6.72404	5.59466	9.73606	5.93061	3.24599	3.06756	2.7536
WP_012057804.1	MAKIFLNGREYEVPDGLTVLEAAEKLGVKIPTLCHHPELEPIGACRVCVVEIEGARTLQPACTTKITDGMKIKTNSDRVENAVKFNLSLIMANHPNDCMYCEADQRCELKKLVHKYDVRPIFNPTDLSDIFDDSSPSIQRDLSRCIKCQRCVRVCSEIQGMNIYSMVERGYKTVPQTAFDQPVYETECISCGQCAYLCPVGAIYETPDWKKVLKLLERKEKILVAQTAPSVRVALGEEFGMEPGSVSTGKMVASLKKLGFDYVFDTNFAADLTIVEEGTELVERFKEGGPFPMFTSCCPGWINLLEKIYPEFIPNVSSAKSPQQMMSSVVKTYFAKKIGVDPEDIIMVSVMPCTAKKDEIKRPQQKIKLEDGREIQTTDYVITTRELAKLIKLKEINFA…	[FeFe] Group A1	[FeFe] Group A1	Evolving	Labile	1	[FeFe]-centre, 3 x [4Fe4S] clusters, 1 x [2Fe2S] cluster	None	0.317124	0.295257	0	0	0	0	0	0	0	0	0	0	0.644611	0	0.677647	0	0	0	0	0	0	0.422315	0	0	0	0	0	1.78219	0	0	0.200378	0	0	3.68666	0	0	0	0	0	0	0.917866
WP_009277946.1	MAGSMRGVYTNLTEIRRNVFREVAKVCYAMGDDPGKTDSDIDDAFDELPFKILPGDVATYRESVFLERAIIGERIRLAMGLPLQGVERPARISDGFKEAETADLAYYEPPLINVIKFACNACKDNVYEVTNTCQGCLAHPCREICPKNAISFVDKRAFIDQDACIHCGMCAKTCPYQAIHHHVRPCAAACGMNAIGSDEHGRADIDYEKCVSCGQCLVNCPFGAIADKSQIAQVIWAIHSGQEVIAAVAPSFVGQFGGKGNVGKLREAFKLLGFSGVEEVALGADLCTMQEAEDFLEEVPDKLPFMGTSCCPAWSVMAKREFPEHANCVSMALTPMTLTARMIRAQHPNAKIVFVGPCAAKKLEAMRRSVRSEVDFVLTFEEMAGMMASKDIDYLSLED…	[FeFe] Group B	[FeFe] Group B	Evolving	Labile	1	[FeFe]-centre, 2 x [4Fe4S] clusters	None	2.033	3.23983	0.604674	0	3.10251	1.14643	1.22739	3.18302	2.88053	1.82684	4.56754	0	0.644611	0	3.38823	0.62825	0	3.2323	1.76515	0	2.31368	1.26695	0	0	3.09421	4.05422	2.90305	0.891093	5.86918	0.672082	2.00378	2.57722	6.91323	0	0	4.66222	1.21701	1.97687	0.540998	9.8162	3.67147
WP_002848990.1	MKNKRVFDTKVQYLKYKVLREVAREAWDDTLLEDLLDIPKKIVSGKTPTMRCCVYKERAIIAERVKIAMGGDKENPNVIEVIDIACDECPAAGYEVTDSCRGCLAHRCEDVCPRGAISFDHNHVAHIDKSKCVECGRCSKVCPYSAITNRVRPCQNACKIKAISINEDGGAAIDNEKCISCGACVYQCPFGAITDKSFILDVIDMIKKNSRDKKSKLYAVVAPSISSQFTYAKLGQVVSGLKTLGFHAVVEAALGADMVAYSESKELVEKGFLTSSCCPAFVSYVKSAFPELTEHISHNPSPMAAIAKYIKDIEPSAKVVFIGPCTAKKAEAQLKEVKAYVDSVLTFEELQALFDSRDLDITQLEEEALDNASYFGRIFARSGGLSDAVAEAIKEQGIE…	[FeFe] Group B	[FeFe] Group B	Evolving	Labile	1	[FeFe]-centre, 3 x [4Fe4S] clusters, 1 x [2Fe2S] cluster	None	9.83147	11.2367	8.46543	8.14233	18.615	20.0625	4.90955	6.36604	6.33716	30.1429	18.2702	3.79621	10.3138	0	14.9082	0	11.4983	5.81813	1.76515	0	1.15684	7.03859	25.6068	0	22.2783	8.78415	5.8061	8.01984	14.673	16.8021	1.00189	8.37597	3.45662	1.58	2.68962	0.932444	7.30204	11.8612	2.70499	31.9026	0.917866
WP_026893765.1	MNKYFHSVVLEEEKCKGCTHCMRKCPMEAIRVRDKRAIIIKERCIDCGECIIVCPYHAQNAITDDLSRLQDFEMNIAILSTTMYGQFTDNIDMNKVYQGIKNMGFDYVYDEGIAADISSIILRNIIEKEKIPKPIISSMCPAILRIIQVRFPTLLKNIVNIESPMEIAARLAKREIMKKNNIKEDNIGVFYLTPCPAKVTSIKQPIGIEKSELTGAISIKKIYGDIVSNTKHITDYDKFNKGSHLGIGWSSVGGQSKAIGIKNYISADGIDNVIDVLEEIELGKLNNIDFFEGYACIGGCVGGPLNVENPFIASSRIRKISNNEEYKSKVKDSYAMDLYKTKAVCWTNELKPKEIMQLDDDFETAVKKIEKLKYILDILPGLDCGSCGAPSCRALAEDI…	[FeFe] Group C	[FeFe] Group C1	Sensory	Labile	2	[FeFe]-centre, 2 x [4Fe4S] clusters, PAS domain	Histidine kinase	1.11736	1.13798	1.20935	1.80941	0	0.573215	1.22739	0	0	1.82684	1.82702	0	1.28922	0	0	0	3.83277	0.646459	0	0	0	4.36392	1.34772	0	0.309421	1.35141	1.93537	3.56437	0.978197	0.672082	0	1.28861	0	0.526666	1.34481	0.932444	0	2.9653	0	1.22702	0.917866
WP_018703126.1	MAHITEIVSIRRSVLAELAKLTREGNLVAEIENSAFSLVSENGSRYRCCVHKERAVLKERFNLAMGQEVDMPLAEAAQRTLAGQYAQMPIISVLPEACDQCPIDKFFVTNACRNCIAHNCKNSCPKNAIMIVQNQAYIDKTKCVECGMCKKSCSYGAIIEVNRPCEGACELKAIKAGADRKAVIDYDKCVQCGGCKVACPFGAISDRTYLVQVLRAIDAGKQVHALLAPAFIGQFGAKVQPGQVVAGLKKIGFSEIEEVSFAADIVTLEEAKEFAETVPQERPFMTTSCCPAFVGMVDKHLPQVKELVSSTVSPMIAAGKVVKEKNPEAVTVFIGPCVAKKYEAEVKGQGVIDYVLTFEELQGIFEGLEIDLSAIEAVPFQTAASRDGNIFARAGGVEQ…	[FeFe] Group B	[FeFe] Group B	Evolving	Labile	1	[FeFe]-centre, 3 x [4Fe4S] clusters, 1 x [2Fe2S] cluster	None	0.115139	0.0548771	0	0	0	0	0	0	0	0	0	0	0	0	0	0	0	0	0	0	0	0	1.34772	0	0.309421	0	0	0.891093	0	0	0	0	0	0	1.34481	0	0	0	0	0	0
WP_013278831.1	MVSVTVDGQEVEVEEGATVLDAAEKLDIDIPTLCYLEDLNEPGSCRVCLVEIEGEENYQPSCVYNVTDGLEVRTNTPGVIEARKKMIELLLSDHPFDCLTCAANQNCELQSIAKQHGIRDIDFDGERNEFPVDDLSPALVREPSKCIRCRRCISVCSEIQEVHIYDINERGFDSVAAPAFNESLMDTPCITCGQCIMVCPTGALHGQDDKQKVWDALADDTKHVVIQTAPAIRVTIGEMFGMEVGSLVTGKLVSALKRVGFDRVFDDCFGADVVVMEEGRELMERLESGKDLPQFTSCCPGWVKFCESFYPSLLDNLSSCKSPQQVFGALAKTYYAEKAGIDPDNIFSVSTMPCVAKKYEAQRPEMDDSGRQDVDAVLTTRELGEMIKQIGIDIENLPE…	[FeFe] Group A3	[FeFe] Group A3	Bifurcating	Labile	3	[FeFe]-centre, 3 x [4Fe4S] clusters, 1 x [2Fe2S] cluster	NADH dehydrogenase, thioredoxin	0.0977112	0.056119	0	0	0	0	0	0	0	0	0	0	0	0	0	0	0	0	0	0	0.578419	0	0	0	0	0	0	0	0	0	0.801513	0	0	0	0	0	0	0	0	0.613512	0
WP_013607980.1	MSIVHVKINGIPVEVEEGTSVLNAAKKAGVKIPTLCYHEDLKPFGSCGLCIVKQEGSAKIIRACAAPVNEGLSVITHDHELFEARKTILELILSTHPSSCLTCIRNGECELQDLAAEFGIREQPFEVRLNDRAKDTSSASIVLDPEKCIKCGRCVQVCQDLQGVFALEFIGRGDETCMAPAAMLKLEDSPCVRCGQCAAHCPVGAIYEKDEIATFLAAAADPQKQVVVQIAPSIRVGLSESFGLPAGTVTTKKIYAALRRLGAKAVHDTNFGADLTIMEEGTELVTRLTKGGALPQMTSCCPAWVDYVQKYYPDLLDHVSSAKSPMQMVGAIEKTFYAEKMGMDPAKMYTVAIMPCTAKKYESDRDEHMYASGFRDVDLVLTTREFARLIKSQGIDFLS…	[FeFe] Group A3	[FeFe] Group A3	Bifurcating	Labile	4	[FeFe]-centre, 3 x [4Fe4S] clusters, 1 x [2Fe2S] cluster	NADH dehydrogenase, thioredoxin, thioredoxin	0.182577	0.0901825	0	0	1.55125	0	0	0	0	0	0	0	0.644611	0	0.677647	0	0	0	0	0	0	0.422315	0	0	0	0	0	0	0	0	0	0	0	0	0	0	1.21701	0.988435	0	0	1.83573
WP_004630049.1	MSMVNITIDGKKLQVEKDMTILEAARQANIKIPTLCFLKDINEIGACRMCVVEIKGARALQAACVYPVAEGLEIYTQSPNVREARKVTLELILSNHDKKCLTCVRNRNCELQTLSEELNINELRFEGESTDMPLDNFSPSIVRDPNKCILCRRCVSVCRNVQTVSVISAAERGFKSVISCAFDKSLADVPCTMCGQCISVCPVGALKERDDTGRVWEALADPELHVVVQTAPAVRVAIGEEFGLPIGSRVTGKMVSALSRLGFAKVFDTDTAADLTIMEEGTELLNRIRNGGKLPVITSCSPGWIKFCEHNYPEFLDNLSSCKSPHEMFGAVLKTYYAEKTGIDPAKIFVVSIMPCTAKKFEAQRPELSAAGFADVDVVLTTRELAKMIKEAGIDFNSL…	[FeFe] Group A3	[FeFe] Group A3	Bifurcating	Labile	4	[FeFe]-centre, 3 x [4Fe4S] clusters, 1 x [2Fe2S] cluster	NADH dehydrogenase, thioredoxin, thioredoxin	0.132424	0.0556986	0	0	0	0	0	0	0.576106	0	0	0	0	0	0	0	0	1.93938	0	0	0	0.281543	1.34772	0	0.618842	0	0	0	0	0	0	0	0	0.526666	0	0	0	0	0	0.613512	0
WP_013273987.1	MENITIKINGMDVSAPAGSTILEAARLAHVEIPTLCFLKDMNEIAACRICTVEINGGRLAASCVYPINPGMEVLTNTPKLREYRKKTLQLILSNHDRSCLSCVRSGNCELQTLCKELGVDADDYYDGAKTPSTLDESAAHMVRDNSKCILCRRCSAVCEKVQGIGVIGPNERGFATIIGSAFDMGLGDTSCVSCGQCIAVCPTGALYEKSSIDEVAAAIADRSKHVIVQTAPAVRAGLGEEFGYPIGTNVEGKMAAALRRLGFDKVFDTNFSADLTIMEEAHEFIDRVQNGGVLPMITSCSPGWIKYCEHYFPDMTENLSSCKSPQQMFGAIAKSYYAEKMGLKPEDIVSVSVMPCTAKKFEIGRDDQDANGSPDVDYSMTTRELARMIKQAGIRFTEL…	[FeFe] Group A3	[FeFe] Group A3	Bifurcating	Labile	3	[FeFe]-centre, 3 x [4Fe4S] clusters, 1 x [2Fe2S] cluster	NADH dehydrogenase, thioredoxin	5.01965	5.6139	8.46543	3.61881	4.65376	14.9036	1.22739	0	6.33716	10.0476	0.913509	3.79621	9.66917	0	2.03294	1.88475	7.66555	4.52521	5.29544	1.97418	2.89209	5.4901	4.04317	2.08095	3.09421	6.08133	1.93537	15.1486	2.93459	3.36041	2.40454	9.66458	2.30441	5.79332	4.03442	3.72977	3.65102	6.91904	0.540998	15.9513	0.917866
WP_014450582.1	MSVYETQGFRMDNSGRRVVVDPVTRIEGHLRCEVNLDSNNIIRNAVSSGTMWRGIETILKGRDPRDAWAFTQRICGVCTGVHALVSVRTVEDALGITIPDNANIIRNLMHLTLMVQDHLVHFYHLHAMDWVDVPNALKADPRQTSAIAQKISRWPNSSPGYFRDVQNRLKKFVESGQLGPFMNGYWGNPSYKLPAEVNLLAVTHYLEALDFQKEIVKIHTIFGGKNPHPNWLVGGVPCAINIDGDLSAGAPLNMERLNYVSQIIERTITFIDQVYIPDLVAIASYYKDWLYGGGLSSQNVMSYGEFPDHPNDYSPRNLLLPRGAIIGGDLSTVHPVDLKNPTEIEEFVVHSWYRYPDETRGIHPWDGITDPNYILGKNAKGTPTDIKELDEEGKYSFIK…	[NiFe] Group 1d	[NiFe] Group 1d	Aerobic Uptake	Tolerant	3	[NiFe]-centre, 1 x [4Fe3S] cluster, 1 x [3Fe4S] cluster, 1 x [4Fe4S] cluster	Cytochrome b	0.232855	0.118409	0	0.904703	0	0	0	0	0	0	0	0	0	3.01073	0	0	0	0.646459	0	0	0	0.140772	2.69545	0	0	0	0	0	0	0	1.40265	0	0	0	0	0	0	0	0	0	0
WP_028308066.1	MELVSLKIDNRLVEVHPGATILEAAEIAGVNIPTLCYMKDINKVGACRICVVEVVGARTLAAACVVPVAQGMEVLTNTEKVRNARKFNLELLLSDHDVECLTCIRNQNCELQKMAELLGVRDMRFVGKRNLSAKDMSTPALIRDPQKCILCRRCVSVCKQVQSVEAIVPLGRGFKTLIGTQFNEALSYSVCVQCGQCVLVCPTGALVEKENTEEVWKALSDPRKHVVVQTAPATRVSIGQEFGLEPGTVSTGQMVAALKLIGFDKVMDTDFTADLTIMEEGSELIERLTNNGTLPMITSCSPGWIKFIEHFYPELTEHLSTCKSPQQMFGALLKTYYAEKVKIDPADIVSVSIMPCTAKKFEADRPEMTDSGYTDVDYVLTTRELARMFKQAGIQLNKL…	[FeFe] Group A3	[FeFe] Group A3	Bifurcating	Labile	3	[FeFe]-centre, 3 x [4Fe4S] clusters, 1 x [2Fe2S] cluster	NADH dehydrogenase, thioredoxin	1.31185	1.3903	0.604674	0	1.55125	0.573215	0	0	1.72832	6.39394	4.56754	0	0	0	2.71059	0	3.83277	1.29292	0	0	0.578419	0.422315	0	2.08095	4.33189	1.35141	0	0.891093	0.978197	3.36041	1.8034	2.57722	1.15221	0	0	0.932444	2.43401	0.988435	0.540998	1.22702	0.917866
WP_012635141.1	MSDTLVINGKTVAINGEKNLLELIRKQGIELPTFCYHSELSVYGACRMCLVEEENMGIIATCSTAPQPGMNIKTHSPRVQRIRKMALELLLANHDRDCTTCSRNGNCKLQDLAQRFGIDEVRFGTREEVLPVDNSSPSIVRNPNKCILCGDCVRTCQEIQGIGVLDFANRGSKSIVAPAFNKDLIEVDCVACGQCVAVCPTGALTIKSDISRVWEAINDPAKTVVVQIAPAVRVAIGEEFGMEPGEIQMGQLVAALKRLGFDKVFDTSFAADLTVMEETAEFIERFKEGKKLPQFTSCCPAWVKYAEEYAQDFLDNLSSCKSPQQMFGSVAKRFYSQDLGIDPEDMVVVSIMPCTAKKFEAQRPEFITDGVPDVDVVITTQEVASMIKKSGLVFSELGI…	[FeFe] Group A3	[FeFe] Group A3	Bifurcating	Labile	3	[FeFe]-centre, 3 x [4Fe4S] clusters, 2 x [2Fe2S] cluster	NADH dehydrogenase, thioredoxin	0.741391	0.747283	0	0.904703	0	0	0	3.18302	2.30442	0.913421	0.913509	1.89811	0.644611	0	0	0	0	0.646459	0	0	1.73526	0.84463	2.69545	6.24286	0.928262	2.02711	0	0.891093	0.489098	0.672082	0.801513	0.644305	2.30441	0	0	0	0.608504	0	1.62299	0.613512	0
WP_005035184.1	MDHLSSHKRIKVNVNHREIQVYSDLTILQALLQENLHIPHLCYDIRLERSIGNCGLCVVEVVEGEVIREVKACQTPIREGMVIHTQNPKLESYRKVRLQQILADHNADCVAPCVQTCPAGIDIQKYLRHASHGNFENALRVIKDRNPFPQACGRVCPHPCETQCRRNLVDTPVAINHVKRFIADWDISRDTAWLPEKEAPTGKRIAIVGGGPSGLSAAYYSAINGHEVTVFERQPEAGGMMRYGIPEYRLPKVTLDAEINHIQKLGVRLETGRSLGTHLRLEELRNNFDAVFLAIGSWRATSMNLEGENQDGVWQGINFLAAVTKRAPVHLGETVVVVGGGNTAIDCARVAQRMGAKKVQLLYRRTQEEMPAEPMEIEEALHEGVEMLFLTAPQAITAA…	[FeFe] Group A1	[FeFe] Group A1	Evolving	Labile	1	[FeFe]-centre, 3 x [4Fe4S] clusters, 1 x [2Fe2S] cluster	None	20.4926	25.9655	15.1168	19.9035	15.5125	24.075	15.3423	14.3236	23.0442	23.7489	16.4432	17.083	17.4045	6.02146	11.52	5.026	26.8294	19.3938	12.356	21.7159	9.2547	23.3681	25.6068	18.7286	18.2558	37.1637	18.386	13.3664	15.1621	18.1462	16.6314	16.7519	43.7838	18.96	17.4825	25.176	20.0806	26.6877	33.5419	30.0621	22.0288
WP_015518172.1	MSYLRLKKSNCKNCYKCIRHCPVKSIRFSDGQANIVEDECILCGMCFVACPQNAKQIRNDVGKAKELIVSGTPVYVSIAPSFVANYDGIGITALNDALKKLGFAGAEETAEGAQLVTEQYEKLVADGEHKIIISSCCHTVNTLIQKYYPQALPYLAQVKSPMLAHGEILKKKYPGCHTVFIGPCLSKKAEADAYAGAIDCVLTFEELTGWLKEENIEVCPVSDNAGRSNRAKTRLYPTTSGILRSMNKDNPEYLYMAIDGVENCRNALRDIIDGNVGKCFIEMSACVNSCIGGPAMDKKHEGVIHERRAVDEFAGSGRFDTVELADMTKSLPFISMQKTMPGSKAIEEILRKMNKSDPSQELNCGSCGYDTCREKAIAILQGKADLTMCLPYLKEKAES…	[FeFe] Group C	[FeFe] Group C3	Sensory	Labile	2	[FeFe]-centre, 2 x [4Fe4S] clusters, PAS domain	Phosphatase	29.6032	35.5576	15.1168	17.1894	7.75626	29.8072	3.06847	19.0981	5.18495	42.0173	30.1458	3.79621	5.15689	3.01073	355.087	0	3.83277	8.40397	10.5909	0	10.99	11.2617	12.1295	2.08095	118.199	8.10845	4.83842	15.1486	5.86918	49.7341	4.6087	11.5975	1.15221	0.526666	24.2065	7.45955	7.91055	29.653	3.24599	79.1431	0.917866
WP_010939208.1	MGGCKAKTAPGVPVTPQSSYTGPITIDPVTRIEGHLRIEVEVENGKVKRAYSSSTLFRGLEIILKGRDPRDAQHFTQRTCGVCTYTHALASTRCVDNAVGVHIPKNATYIRNLVLGAQYLHDHIVHFYHLHALDFVDVTNALKADPAKAAKIASSISPRKTTAADLKAVQDKLKAFVASGQLGPFTNAYFLGGHPAYYLEPELDLIATAHYLEALRLQVKAARAMAVFGAKNPHTQFTVVGGVTCYDALTPKRIQEFTDLWKETKAFVDEVYIPDLLAVASRYKDWTQYGGTTNFITFGEFPKDEYDLNSRFFKPGAVFKRDFQNIKPFDPMQIREHVRHSWYEGAEARHPWKGATEPKYTDLHGEDRYSWMKAPRYMDDPMETGPLAQVLVAYAQGHK…	[NiFe] Group 1b	[NiFe] Group 1b	Anaerobic Uptake	Sensitive	3	[NiFe]-centre, 2 x [4Fe4S] clusters, 1 x [3Fe4S] cluster	Cytochrome	0.107399	0.0203261	0	0	0	0	0	0	0.576106	0	0	1.89811	0	0	0.677647	0	0	0	0	0	0	0	0	0	0	0	0.967684	0	0	0	0	0	0	0	0	0	0	0.988435	0	0	0
WP_021800342.1	MFQFETQLNKLKHEVLKNVAILAKENRLNQEELEKIPYEIITDETPRYRCCVYKERAIVAERAKLAAGYLADGDKINCELIDIRPNEQIIYVIEAACDRCPINRYTVTDQCRNCLAHRCLESCAVNSISMVGGRAYINQETCKECGRCKSACPYNAISEVMRPCKVSCPTGALAVNTEDRRAMIKEEDCINCGACVSACPFGAISDKSLIAPVAKRLAKGRKMYAVVAPAISGQFGMKVSYGQIKNAIKKLGFEDMVEAACGADAVTVHESNEFVERMENGDKYMTNSCCPGFLSYIEKKFPDQVERISGTVSPMVATGRYIKEKDPEAKVVFIGPCTAKKSEAVRESVADAVDYVLTFEELFALLEAFDVDPANCEAEVVEDASIFGRGFGIHGGLTS…	[FeFe] Group B	[FeFe] Group B	Evolving	Labile	1	[FeFe]-centre, 3 x [4Fe4S] clusters, 1 x [2Fe2S] cluster	None	0.400034	0.285698	0	0	0	0	0	11.1406	0	0.913421	0	0	0	0	0.677647	0	0	0	0	0	0	0.140772	1.34772	0	0.618842	0	0.967684	0	0	0	0.200378	0	0	0	0	0	0	0.988435	0	1.22702	0.917866
WP_012635165.1	MGLVITSEAKCRDCYKCIRYCPVKAIGIKDGQAWVDEDRCILCGRCIEACPQNAKKTEQYLDKFKNYIASGNKVVVSLAPSYLASGYFSTPWKLVGALKELGVDVVEETAIGAEVIADEYRDLLNKKELIISSCCPTVVNLVEKYFPGLCDYLAPVISPMIAHGRLIKQEMGENCRVVFIGPCYAKKEEALTRGEGSIDAVLTFEEIFNYLDRLNQDIPPRNIFPDRTSNRARRFPLPGGALRTGGLNELNIKPDDIVSISGLEDCMETFRDIEKGLIKPRFIEAMACRGGCLGGPAMGEDAGILARKQRLYNNLNRGQQSCRGANNKGIIVSWSYTPREIDYKVPDEEEIKRILALTGKTSPEDETNCGGCGYPSCRDKAIAVYNGLANPEMCIPYMR…	[FeFe] Group C	[FeFe] Group C3	Sensory	Labile	2	[FeFe]-centre, 2 x [4Fe4S] clusters, PAS domain	Phosphatase	0.252923	0.182211	0	0	0	1.14643	0	0	0	0	0	0	0	0	0	0	0	0	0	0	0	0.563087	0	0	0	0.675704	0	0	0	0	0	0.644305	0	0	0	0.932444	1.21701	0.988435	0	0	0
WP_010250212.1	MNSKQYMTIDGIPVEINGEKNLLELIRKVGIKLPTFCYHSELSIYGACRMCMIENEWGGLDAACSTPPKAGMNIKTNTARLQKYRKMILELLLANHCRDCTTCSNNGKCKLQDLAMRYNINSVRFPNTASEPMVDDSSLCITRDQNKCILCGDCVRVCNEVQNVGAIDFGYRGSKMKICTAFDKPIAQSNCVGCGQCALACPTGAIVIKNNTDKVWKEIYDNNTKVTVQIAPAVRVALGKELGLNDGENAIGRIVAALRRMGFDEIYDTSTGADLTVLEESAELLKRIKDGNNDMPLFTSCCPAWVNFCEKHYPELLPNVSTCRSPMQMFASVIKEQNSNSSRRVVHVAVMPCTAKKFEAAREEFKVNGVPNVDYVISTQELIQMIKESGIIFTDLEPE…	[FeFe] Group A3	[FeFe] Group A3	Bifurcating	Labile	3	[FeFe]-centre, 3 x [4Fe4S] clusters, 1 x [2Fe2S] cluster	NADH dehydrogenase, thioredoxin	7.26268	8.41684	6.04674	8.14233	9.30752	18.3429	7.97802	1.59151	0.576106	10.0476	8.22158	7.59242	1.28922	3.01073	4.06588	1.2565	0	53.0097	15.8863	0	0	24.3535	4.04317	2.08095	0.618842	12.8384	2.90305	1.78219	7.33648	1.34416	5.20983	3.22153	0	6.84666	12.1033	10.2569	13.3871	8.89591	1.082	7.97566	18.3573
WP_006778913.1	MVTNDATVLRIKHDVLYEVAKLAWEGALDEKKEDIPYKLIPGPQARFRCCIYREREIIRQRVRLAEGLCPADGKDTTNIVQVIGAACEGCPIARFTVTDNCQLCMGKACQNSCNFGAISMGRDRAYIDPDKCKECGKCAQACPYNAIADLTRPCRKACPVDAITMDENGLVEIDESKCIQCGACIHGCPFGAIGSKSFMVDVIDMIRAGKKVVAMVAPATEGQFGADITMASWKTALKKIGFADMVEVGLGGDLTAAAEAAEWAEAYRDGKKMTTSCCPAFVNMIKQHFPMLLENMSTTVSPMCAVSRMLKEKDPETVTVFIGPCIAKKSETLDLNIKDNADYALTYSEIRAAMKAKNVNLEPEENIYQESSVFGKRFGNGGGVTAAVLECLKETGENT…	[FeFe] Group B	[FeFe] Group B	Evolving	Labile	1	[FeFe]-centre, 3 x [4Fe4S] clusters, 1 x [2Fe2S] cluster	None	15.1385	18.6152	9.07011	17.1894	23.2688	8.02501	7.97802	31.8302	16.7071	4.5671	21.9242	9.49053	15.4707	15.0536	23.04	7.539	22.9966	12.9292	28.2423	23.6901	14.4605	32.9406	5.3909	20.8095	4.33189	18.244	13.5476	10.6931	5.38008	8.06498	18.034	10.9532	4.60882	8.42665	16.1377	22.3786	1.21701	6.91904	3.78699	2.45405	4.58933
WP_006442445.1	MENMENINLKINGLDVSAPAGSTILEAARLAGIKIPTLCFLKEINEIGACRMCIVEVKGARNLVAACVHPVNEGMEVFTNTPQLIASRRRTLQLLLSNHDQKCLSCVRSGNCELQQLCKEYGVDDADYYEGDMTHYDLDESAAHMVRDNNKCILCRRCVATCEKTQGIGVIGANNRGFDTMIGSAFEMGLGETSCVSCGQCIAVCPTGALYEKDYTQQILDAIADPDKYVVVQTAPSVRAGLGEEFGYPMGTDVEGKMAAALRRVGFDKVFDTDWAADLTIMEEATELLDRVKNGGVLPLITSCSPGWIKYCEHYFPDMTEHLSSCKSPQQMFGAMLKTYFAEKEGIDPKKIVSVSVMPCTAKKFEIGRDDQDAAGVPDVDIAITTRELARLIKRCGIE…	[FeFe] Group A3	[FeFe] Group A3	Bifurcating	Labile	4	[FeFe]-centre, 3 x [4Fe4S] clusters, 1 x [2Fe2S] cluster	NADH dehydrogenase, thioredoxin, thioredoxin	13.1922	15.482	21.7683	11.7611	6.20501	36.6858	9.8191	4.77453	7.48937	21.9221	24.6647	5.69432	34.809	3.01073	4.74353	1.88475	11.4983	11.6363	7.06058	1.97418	5.20577	8.02399	8.08635	0	11.1391	12.1627	1.93537	44.5547	13.2057	24.195	3.60681	27.0608	1.15221	30.5466	8.06885	3.72977	17.0381	5.93061	3.24599	12.2702	6.42506
WP_014553742.1	MGQNTISEVVKLKRRLYVELLKLVRSGELVKKIASLSQKMITKESTRYRCCEFKERAILDERIKAVLGFNIAENKEKSLEDLAALLPHKNESDKIVQVIETACDSCPIDKYIVTDACRNCVAHKCVNACPVDAIVIIQNKAYIDQHKCIECGKCAKTCSYNAILENQRPCSRACELEAISSNADRQAKIDREKCVSCGSCINACPFGAITEISDLVQVAIEICDGKSNLAALLAPAFVGQFGYQQSAAKVKYALKKIGFSQVREVAAGAEETAYLEAEELKEKIELNQTLLSSCCPAFKKMVEKEFKELSNLISETESPMALTARAVKSESKNTKTVFIGPCTAKKEEALKNKEVDYVITFTELVALFTAYNINLAELEAEEALTDAGKLGRQFAFAGG…	[FeFe] Group B	[FeFe] Group B	Evolving	Labile	1	[FeFe]-centre, 3 x [4Fe4S] clusters, 1 x [2Fe2S] cluster	None	0.130943	0.0361294	0	0	0	0	0	0	0	0	0	0	0	0	0	0	0	0	1.76515	0	0.578419	0.140772	0	0	0	0	0.967684	1.78219	0	0	0	0	0	0	0	0	0	0	0	0.613512	0
WP_028515986.1	MENITVKINGVELEVPKGTTVLEAAHMAGFEIPTLCYMKEINEIGACRICVTEVNEGRGFRLVAGCVYPCSNNMEILTNSPKVIESRKRTLELILSTHDRKCLSCVRSGNCELQKLAKDYGVEDATVYDGVKNEYEVDNSAPHMYRDNNKCILCRRCVAVCAKTQGIGVIGANERGFKTYIGSAFDMGLGETSCVSCGQCIAVCPVGALSEKDYTKEVMAAIADPEKTVLVQTAPAVRAGLGECFGNPIGTNAEGKMVAALRRLGFDKVFDTDFAADLTIMEEANEFLDRFKNGGTLPLITSCSPGWVKFCEHYYPDLLDHLSTCKSPQQMFGATAKTYWAQKMGIDPKNIVMVSIMPCTAKKFEIGRPDQSAAGVPDVDYALTTRELGRMIERAGILF…	[FeFe] Group A3	[FeFe] Group A3	Bifurcating	Labile	3	[FeFe]-centre, 3 x [4Fe4S] clusters, 1 x [2Fe2S] cluster	NADH dehydrogenase, thioredoxin	9.54409	13.2651	10.2795	9.95173	9.30752	30.3804	7.97802	0	3.45663	13.7013	10.9621	0	8.37995	3.01073	9.48705	0.62825	11.4983	1.29292	1.76515	0	2.89209	7.74244	5.3909	0	15.7805	7.43274	4.83842	25.8417	3.91279	23.5229	3.00567	14.1747	0	13.6933	12.1033	5.59466	10.9531	5.93061	3.24599	17.7919	0.917866
WP_013780872.1	MDNNYFHSVTLNKEKCRGCTNCIKRCPTEAIRVRAGKANITAERCIDCGECIRVCPYHAKLAVTDPVDVISKYKYTIALTAPTLYGQFKRIEDALAVDDALKALGFDDVFEVAKAADIAAHFIKQRIESADIPRPIISSSCPVIVRLIQVRFPSLIEHMVDVWSPMEIAGYIAKQRAIETTGYDPDDIGAFFITPCPAKMTAIRHPIERRTSSVDGAIAISDIFGHIVAEVGGISSSRGAIEASSFGLGWANSGGESLSIGADNSLAVDGIQNVIKVLEEIEDDKMNDLDFFEGLSCPGGCVGGPLTVENGFVARNRIRKWAKSLSGQLYMTSLPRAPYFEQPILPNPAMKLDDDINAAMEKMQRIEIITDELPGLDCGSCGSPSCRALAEDIVQGKAS…	[FeFe] Group C	[FeFe] Group C1	Sensory	Labile	2	[FeFe]-centre, 2 x [4Fe4S] clusters, PAS domain	Histidine kinase	0.898537	0.895545	0	0.904703	0	0	1.22739	0	0	0	3.65404	0	0	0	0	0	0	2.58584	0	0	0	1.26695	2.69545	4.16191	4.02247	2.70282	0.967684	0	1.4673	4.03249	0	0.644305	0	0	0	0	3.04252	0.988435	0	0.613512	0
WP_010690649.1	MVNLTIDNIKISAKENMTIMEAAESAGIPIPKLCFLKGINEIAACRVCVVELEGKEKLITACNNSVEEGMVVYTNSPKVRIDRRRTVQMILSQHDCKCAICVRSGNCTLQTLANDLNIQDVLYEEQLEDQPWDKNFPLIRDSKKCIKCMRCIQVCDKIQSLNIWELEGTGARTTINVSGSRTIADADCSLCGQCITHCPVGALRERDDTEKFWRAVANPDKVVVVQVAPAIRTAWGEHIGLDLKDASVNKIFDALKRIGADYVFDTAFSADLTIMEEAYEFIERFSKGELKDKPMFTSCCPGWVRFIKSQYPHLVSHLSSAKSPMQMFGAVMKSYFAEKIGKKPEDIFSVAIMPCVAKKGEISMELFYGEYAGHDMDCVLTTREFVRMIKSAHILPETL…	[FeFe] Group A2	[FeFe] Group A2	Evolving	Labile	2	[FeFe]-centre, 3 x [4Fe4S] clusters, 1 x [2Fe2S] cluster	NADH-dependent glutamate synthase	5.31588	8.04154	4.23272	1.80941	1.55125	3.43929	1.84108	3.18302	8.06548	2.74026	3.65404	7.59242	0.644611	6.02146	1.35529	1.2565	7.66555	7.11105	12.356	9.87088	8.09786	5.06778	6.73862	6.24286	1.85652	3.37852	2.90305	8.01984	3.91279	5.37666	3.60681	3.86583	3.45662	15.8	8.06885	13.9867	4.25952	0.988435	1.62299	3.06756	2.7536
WP_013175699.1	MAKNGEHREEVKTLSLTAADTGIIKVTSDCHGCDHCTSVCPSHAIKGRIGEQHHIDTRKCLNCGQCLISCPFGAIEDASMVSQVKKALTDPDIFVVVQEAPSVRVALGEEFGMAPGTNVKGKMYAALRKLGFDRVYDTEFAADLTIMEEGTELIHRIFKHLGIPGYEHVGPLPQFTSCCPAWVKYAEDNYPEVLPHISSAKSPQQMFGAVAKTYAAQKLNVDPANMFVVSVMPCTAKKYECNRPEMIASGYKDVDAVITTRELAQMIKEAGIDFASLPDEKADKFVGLSTGAATIFGATGGVMEAALRTAYEVLSGQSLEQIDFKNVRGLRPIREASVEIPIKDLGKTLPVKVCVVSGTKHVDGVIKDVLKGRSPYHFIEVMNCPGGCVNGGGQPIRRD…	[FeFe] Group A1	[FeFe] Group A1	Evolving	Labile	3	[FeFe]-centre, 2 x [4Fe4S] clusters	Small subunit, cytochrome b	0.204906	0.15323	0	0.904703	0	0	0	0	0	0	0	0	0.644611	0	0	0	0	0.646459	0	0	0.578419	0.281543	0	0	0	0	0	0	0	0.672082	0.400756	0	0	0	0	0	0	0.988435	0	0.613512	0
WP_022746312.1	MSKSKKHRVQEDNIIQMNKKKCIGCTACAFTCAKETKISVLKAVDNGRRTVDPKQVTFGASGCIYCGQCTLACPTTAINVRNDVSLVKEALNSGKYLILTAAPAVKATLGEEFSLPIGTNVGGKIAPSAKKMGFQNVFDTDFGADMTVIEEGTELIKRIVSKENLPMFTSCCPAWVRYVELFHPEILKNVSTSKSPQQMMGASIKTYFADTYNVLPTNIVTVSVKPCTAKKYEAQRDEMGRNGYKDIDIVLTIREYAQLLKEKGINITAIPDESSDPFMGEYTGAAVIFGASGGVMQATLRTVANYLKGDVAEVNNIKFNKIDGYEDIKESIISLGGQNYKVAIVNGLKEIEKFLSGRKWKEYLFVEVMACPGGCINGGGTPRIEMKSKINEKLCIACG…	[FeFe] Group A1	[FeFe] Group A1	Evolving	Labile	1	[FeFe]-centre, 2 x [4Fe4S] clusters	None	5.86081	11.6811	2.4187	28.0458	1.55125	4.58572	0	1.59151	1.15221	2.74026	2.74053	3.79621	1.93383	12.0429	3.38823	0.62825	15.3311	9.05043	28.2423	0	0.578419	7.74244	4.04317	2.08095	9.28262	5.40563	2.90305	0.891093	2.93459	1.34416	11.4216	0.644305	0	0	0	1.86489	0	0.988435	1.62299	4.9081	0.917866
WP_006352873.1	MVAMQELNDIVEIKSQVLYETARHAFKGDLETSWFDIPYEMIKGGKPNFRCCVYRERAIIRQRVKMAMGKLPHDTDQENVDSDQIVYVISSACEGCPITKITVTQNCRGCLAKKCIKACPFGAISTSDGHAVIDKKKCRECGKCVAACPYNAIVDIERPCKNSCAVGAISMDENDVATIDPNKCINCGSCVTGCPFGAISDLSMMTDVIKVLNNKERKIYAMVAPAIEGQFGDVRLPEIKAAIKKLGFDGVYEVALGADIVAYNEAQELVERTQEGKKMTSSCCPAFVNLINKHYPELSENVSTTVSPMVAIERYIKANEPDAMVVFIGPCIAKKNEVVHLYQDEIEFALTFEELNAMLAAKEIKFEDVIPYDDKATRYGKGFAMSGGVSQAVGEVLRE…	[FeFe] Group B	[FeFe] Group B	Evolving	Labile	1	[FeFe]-centre, 3 x [4Fe4S] clusters, 1 x [2Fe2S] cluster	None	0.660398	0.709745	0.604674	0	0	0	0	0	0	0	2.74053	0	1.28922	0	0	0	0	1.29292	1.76515	0	0	0.563087	0	0	0.928262	1.35141	1.93537	0	0.489098	0	0	0	0	0	1.34481	0	0	0.988435	0	0	0
WP_006567084.1	MCVVEDDRGRIFASCSETPRDKMVIYTNTPRLKHHRKMIIELLLASHCRDCTTCTKNGVCVLQKLSRQLGIKEVRFENNKKQLPKDLSSECIIRDPNKCILCGDCVRTCDEIQGMGILDFAFRGSKMQVTTAFNKDLAQTDCVGCGQCRAVCPTGAITIKQDIERVWDALSDPKIRVVVQIAPAVRVAVGDKFGIPKGENVLGRLVAALRRIGFDEVYDTNFGADLTVMEESKELVERLESGDNLPLFTSCCPAWVKFCENRYPQFRKKISTCRSPQEMFGALIKEEARMDEAGDSRKTVVVSIMPCTAKKAEITRPEHFNEGEQNVDYVLTTTEASRMIQESGIDLSQVEPEALDMPFGISSGAGAIFGVTGGVTEAVLRRLMNSDRAEDLEAISFTG…	[FeFe] Group A3	[FeFe] Group A3	Bifurcating	Labile	3	[FeFe]-centre, 3 x [4Fe4S] clusters, 1 x [2Fe2S] cluster	NADH dehydrogenase, thioredoxin	4.06098	8.98849	9.67478	4.52351	0	16.6232	1.84108	1.59151	1.72832	3.65368	1.82702	1.89811	36.0982	0	2.71059	0	0	5.81813	0	0	4.62735	3.37852	6.73862	2.08095	2.47537	3.37852	2.90305	8.91093	2.93459	2.01625	1.20227	6.44305	1.15221	6.31999	2.68962	1.86489	2.43401	0.988435	2.16399	7.97566	0
WP_013842589.1	MTNLTYDQIFSKLVKSAYDGNLSEEIDRLQQEQDEQLNQYIHYATGKGDPERVVFKVKDCGFDCGCEEDGCQVSCLLEAIERDEQGRVVINGNTCTDCGQCVDECKYGCLVDKKEFIPLVEVLKDRKVPVFGIIAPAFIGQFGPDVTPGKMRAALKKLGFYGMVEVALFADILTFREALEFDSHVHKEGDFVITSMCCPMWVSMIKRVYRKMAFHITPSVSPMIACGRGVKKLHSEAKVVFIGPCIAKKAEAKEPDVKDAVDVVITFKELKQIFEATGIQPAEMPEDEKEHSSTGGRIYARTGGVSKAVADTLKRIRPDKPIQIKAVQAHGVKACRQMLQEALEGKITANFYEGMGCVGGCIGGPHVLIDAEEGRRWVDQYGEEASSLTPADNKYVLAL…	[FeFe] Group B	[FeFe] Group B	Evolving	Labile	1	[FeFe]-centre, 2 x [4Fe4S] clusters	None	0.129977	0.0699003	0	0	0	0	0.613694	0	0	0	0	0	0	0	0	0	0	0	0	1.97418	0	0	0	0	0.309421	0	0	0	0	0	0	0	0	1.58	0	0	0	0	0.540998	0	0
WP_015710040.1	MAHYNNNAVLIKRQLLVSIIKLLLEDKLEDEVDRIPYEMTKGADYESIRCCVYHDRSILKTRILARLGFSIEDYIEDGSSLVPQVRKALKRKKIEGPILTVLDEACNACIKTQYLITDACQGCLARPCTMNCPKKAISFSRNRADIDKAKCINCGICLQACPYHAIIKIPVPCEEACPVDAIAKDNDGKERIDFTKCVFCGNCIRTCPFGAMMDKSQIVDVINAMKSGKKLSAMIAPAIAGQFRATLEKLVGALKQAGFDEVYEVALGADITARKEAEEFAERMERDESFMTTSCCPSYIEMVKKHLPDLKSHVSNTRTPMHYTAEIAKKDHPDYGRVFIGPCLAKRKEGIDDPLIDYVLTAEEIGALFTAMDINVMEAEDGIAAGGNARKEGRSFPWS…	[FeFe] Group B	[FeFe] Group B	Evolving	Labile	1	[FeFe]-centre, 3 x [4Fe4S] clusters, 1 x [2Fe2S] cluster	None	0.0873951	0.0572973	0	0	0	0	0	0	0	0	0	0	0	0	0	0	0	0	0	0	0	0	0	0	0	0	0	0	0	0	0.601135	0	0	0	0	0	0	0	0	0	0
WP_012302631.1	MQQETTTTETGIKRVTDKEAQASGHKVKLIIDGREVTAPEGANLVDTAREHGIDIPTLCYLKGVSEPGCCRVCLVEVEGARTLPAACVTPVREGMVVRTNTSRVRRTRRRVVELLLTEHHADCPVCPRAETCELRAVAARVGLNRLRLPNRRRRRQLLEENPFMVRDPEKCIKCRRCVEVCRKIQGVDALGAAGRGFDTVIGPAFGDNSVEAACISCGQCLMSCPTGALTEREYIHEVWKAIDDPDRQVVVQTAPAIQVTLGEEFGMPVGTVVTGKMVSALRRIGFDTVFSTEFAADLTIMEEAHELLERLEGKGDLPLISSCSPGWVKFCEHYYPEFLDNLSTCKSPQEMLGALVKSYYAEKEGLDPARLVTVAVMPCTAKKFEAARPELVSREGRRD…	[FeFe] Group A3	[FeFe] Group A3	Bifurcating	Labile	3	[FeFe]-centre, 3 x [4Fe4S] clusters, 1 x [2Fe2S] cluster	NADH dehydrogenase, thioredoxin	0.160711	0.0813219	0	0	0	0	0	0	0	0	0.913509	0	0	0	1.35529	0	0	0	0	0	0.578419	0	1.34772	0	0.618842	0	0	0	1.4673	0	0	0	0	0	1.34481	0	0	0	0	0	0
WP_012277350.1	MNKRVVIDPITRIEGHLRIEVEVDQNNVITKAWASSTLWRGIEVILKGRTPMDVGLIVQRICGVCTYSHYRCGTEAVENALGVKIPPNAKYLRSLMQSSLHMHDHIVQFYQLHGLDWVDVVSALSADPALAAQEAMKYTANPISAGEGDLRAVQERVTKLVETGQLGPFSNAYWGNRTYKFTPEQNLIALSHYLKALEVQRVAAEMLAIFGGKSPHPQSIVVGGVTSVRDMLSPARLQEWKQKHEFVNDFIIRAYKADIVMAAAAFGSEPSVLGGLNVPNFLATEDFVTTDGQFMFNQGVIMNGDLANVSDLDPMQIVEDVTHAWYKADAPQHPYDGTTIPDYTSLVERETVYGKLPTLNEDGKYSWVKSPRYNGEPIEVGPLASILVSYARGNQVVVD…	[NiFe] Group 1b	[NiFe] Group 1b	Anaerobic Uptake	Sensitive	3	[NiFe]-centre, 2 x [4Fe4S] clusters, 1 x [3Fe4S] cluster	Cytochrome	0.0553318	0	0	0	0	0	0	0	0	0	0	0	0	0	0.677647	0	0	0	0	0	0	0	0	0	0	0	0	0.891093	0	0	0.400756	0	0	0	0	0	0	0	0.540998	0	0
WP_003493654.1	MNYIDISGLNCKNCYKCLRACPVKAIKFKNEKAEIVEERCISCGRCLVICPQNAKKDKPDIKHVKEAIRSGKKVVASVSSVFAGVFNVEEGKIVSALKELGVSYVEETALGGEIVTELYKDYVETTKLNNYITTSCPSAVNLIEKYFPSLIKYMIPIASSMTAHGKILKEIWGKDAFVVFIGPCIAKKTESDIYKKEKVVDAVINFDELKNWFKEMNIDLNSMPIGEFDRNAYKKTRSFTLSGGIINSMGNIIENNNLISMSVSGVEESIQVLKSMEIGEISNTFLEITACRGNCIGGPNMIKNEVSYYTRLNKVKNYIKNRDTSNTIRLLSVPDSIDFSTSFKDRHFEKKKASRKDLLKIMKSMGKHTKEDELNCGVCGYNTCIEKAQAIYEGMAETN…	[FeFe] Group C	[FeFe] Group C3	Sensory	Labile	2	[FeFe]-centre, 2 x [4Fe4S] clusters, PAS domain	Phosphatase	0.194529	0.144452	0	0	0	0.573215	0	0	1.15221	1.82684	0	0	0	0	0	0	0	0	0	0	0	0.140772	0	0	0	0	0	1.78219	0	0	0.400756	0	0	0	0	0	0	0.988435	0	0.613512	0
WP_017873317.1	MSVISTIRTSCRDCYKCIRHCPVKAIRISSGHAEVVDERCVKDGRCVLVCPQKAKKVRSDLEEARALLGKGGRVVASIAPSFVTAFPEATPGQVVQGLKMLGFSEVRETAEGAEWVAKEHALLLAEGRTNVISSSCPAVNFLITRYFPKCIEHLAPVVSPMVAHGRLLKKEDPHTRVVFIGPCIAKKAEAEEEEVRGDVDVVLTFEELREWFQEAHLDLATLPEAPFSRRRVRWARAFPVEGGLLQSASFEVHLLSRDVVTITGIDRCKEFLERFSPERYKFRIIEMMSCEGGCIDGPMLSSSLSPYERRERVLLYTEESLEPEESLVCVDPPSFRRAFVPAPVPSPEVPEEELRKILALTGKFTPQDELNCGACGYNTCREKARAVYQGMAEAEMCIP…	[FeFe] Group C	[FeFe] Group C3	Sensory	Labile	2	[FeFe]-centre, 2 x [4Fe4S] clusters, PAS domain	Phosphatase	0.145592	0.0473441	0	0	0	0	0	0	0	0	0	0	0	0	0	0	0	0	0	1.97418	0.578419	0.422315	0	0	0	0	0	0	0	0	0	0	0	0.526666	1.34481	1.86489	0	0	0	0	0
WP_013608542.1	MIHPIYTELTECRDCYKCVRGCPVKAIQVKDGSAVVVKDRCIYCGHCVDICPSHAKKIRNDLARVRQFLISGRKIYCSLAPSAASEFPEGVDALVLALERLGFTAVSETALGAALVNESIEEYAKEHDGTCSWISTACPTVVQNIKKYHPSLVPALSKVPSPLQCHSAYLRKLYGQDIGVVFVGPCIAKKVEADETPGYPDFALTFEELRTWLKLESLDLSLLAEQIEADPSLVPPFVPCKAGKSTLYPIEGGMIASLSWGSDPFQTKAVAISGSTQVVGTLEGMEKGQRNSDFLELLFCEGGCINGPGCEKGRSSAAKKGCSSRYTRSRITDDAPVFAGDRAFVSTLLEQGYALIEKPGSVAMNPPVSSFVSVHSEAQIERALKSLGKRDKAEELNCG…	[FeFe] Group C	[FeFe] Group C3	Sensory	Labile	3	[FeFe]-centre, 2 x [4Fe4S] clusters, PAS domain	Phosphatase, thioredoxin	0.169128	0.0833111	0	0	0	0.573215	0	0	1.72832	0	0.913509	0	0	0	0	0	0	0	0	0	0	0.140772	1.34772	0	0	0	0	0	0.489098	0	0	0	0	0	1.34481	0	0	0	0	0.613512	0
WP_011993425.1	MVTVYINDKPYEVSENKTVLEVAQELGYYIPTLCHHPELEPIGACRICVVEVEGARTLQPACTTKVSDGMKIRTNTERVESAVKFNLSLIMANHPHECMYCEADGRCELQKLVHMYDIKPIFGVNVDMDKEIDISSPSINRELSKCIKCQRCVRVCSEIQGMNIYSMVDRGYESLPETEFGIPVYETNCISCGQCAYLCPVGAIYEAPDWKKVLNLLNKKEPGKVYVAQTAPSVRVAIGEEFGVEPGTVSTGKMVAALRRLGFDYVFDTNFAADLTIMEEGYELIHRLQNGGKFPMFTSCCPGWVNEMEKEWPELRENLSTAKSPQQMMSSVVKTYFAQKIGVKPEDIVMVSVMPCTAKKDEITRPQQLVDGIKVTDYVITTRELGKLIKLKGIPFVNL…	[FeFe] Group A1	[FeFe] Group A1	Evolving	Labile	1	[FeFe]-centre, 3 x [4Fe4S] clusters, 1 x [2Fe2S] cluster	None	0.184181	0.14395	0	0	0	1.71964	0	0	0	0	0	0	1.28922	0	0	0	0	0.646459	0	0	0	0.140772	0	0	0	0	0	0.891093	0	0	0	0	0	0	0	0.932444	0	0.988435	0	1.84054	0
WP_006520976.1	MSTSRYDEIFKKLVKTAYRGDMAEEVAKIRDGDSVTDQYLLYASGGGDPNTVVFKVRDCSGKCDAGDDNCEASCLFGAIVRDMEGNVVIAPNNCTGCGKCVEVCKHYSLVDKKEFVPLIKILTDRKVPVFAIMAPAFIGQFGPGVTPGKMRAALKRLGFYGMVEVALFADILTLKEALEFERHVTREEDFMLTSMCCPIWVSMVKRVYQDLVPHISPSVSPMVACGRGVKHLHPGARVVFIGPCIAKKAEAKEADIQDAVDAVITFRELEQIFEAVGINPAELEEDESEHSSSAGRIYARTGGVSQAISDTLSRLRPDRKIKIRAIQADGVQDCRRMLKDVLEGRINGNFLEGMGCNGGCVGGPKVIIDPADGRKSVEDYSREAGSMTPVDNKYVMELL…	[FeFe] Group B	[FeFe] Group B	Evolving	Labile	1	[FeFe]-centre, 2 x [4Fe4S] clusters	None	0.143027	0.0789183	0	0.904703	1.55125	1.14643	0	0	0.576106	0	0	0	0	0	0	1.2565	0	0	0	0	0	0.140772	0	0	0.618842	0	0	0	0	0	0.200378	0	0	0	0	0	0	0.988435	0	0	0
WP_015945149.1	MESSASLRNYFEERVLKQPEDFSFGLWTKNEGLVWLKPACLPEVMEQLWLKVPSRPLLMTHVGNDERSLGHGFVIYLLLQFPGDFTLTLGARGIEKSFPSLTLLCPALNWPEREVRDLLGLHPDGHPDPRPLVLHPGWTEGFYPLRKPCPETPVSIGGECPGEALKEVSFNPQPLSFTEAEGEGTFEIPVGPVHAGIIEPGHFRFQTIGETVLHLDAQLFYTHKGIEKLLEGKDLEEGLKIVERVCGVCAVSHALAYCEAVEKLKGMEVPRWILGWRTVLAELERLYNHVGDIGNLCAGVGFALGNGNALQNKEQLQRLNHQLFGHRFLRGNITPGGVKKIPQREERAYLQRRLAELEQDFEEWLPLILEHDGFRQRAITTGVLSKQSALDLGVTGPAA…	[NiFe] Group 4f	[NiFe] Group 4f	Evolving	Sensitive	6	[NiFe]-centre, 1 x [4Fe4S] clusters	NuoL, NuoH, two antiporter subunits	0.0882429	0.0270198	0	0	0	0	0	0	0	0	0	0	0	0	0	0	0	0	0	1.97418	0	0.84463	0	0	0	0	0	0	0	0	0	0.644305	0	0	0	0	0	0	0	0	0
WP_026895551.1	MNMVNITIDGQNIQVPQDYTVLEAARSAGIDIPTLCYLKDINEVGACRMCIVEVKGARRLEASCVLPVSEGMVVKTNTKKIREARKATLELILSNHNGDCKTCERSGKCELETLANELGVTDIGFTGEMNTYTIDDLSPSIVRDPNKCILCGRCVNVCKNVQNVGVLSFVERGFNTMVAPSFNMSLSEVPCINCGQCIAACPVGALKEKNEIDLVWEALEDDSKHVVVQTAPAVRAALGEEFGLPIGTRVTGKMAASLRRLGFDKVFDTDFAADLTIIEEGYELLGRLKNDGKLPMITSCSPGWIKYCEYNYPDFLDNLSSCKSPHEMMGAVIKSYYAEQNDIDPKDIFVVSVMPCTAKKFEADREELAATGYPDVDAVITTRELAKMIKEGRVDFLSL…	[FeFe] Group A3	[FeFe] Group A3	Bifurcating	Labile	4	[FeFe]-centre, 3 x [4Fe4S] clusters, 1 x [2Fe2S] cluster	NADH dehydrogenase, thioredoxin, thioredoxin	3.94566	4.48216	2.4187	9.95173	10.8588	6.30536	3.06847	7.95755	4.03274	4.5671	0.913509	3.79621	3.22306	0	5.42117	0	11.4983	2.58584	0	0	1.73526	8.4463	2.69545	0	9.59205	4.05422	3.87074	8.01984	6.84738	2.68833	1.60303	7.08736	3.45662	1.58	1.34481	2.79733	1.82551	5.93061	0.540998	11.0432	1.83573
WP_013276251.1	MREDIIKLRRKIYRLIAEHARTLDNLQDVYTAVVESISDEINREEAEARVRAALGTFEEGQIPETVNFPFISVIEKACEGHGEKCGCRITCEPKAVKVNEEGKPSIDLNECISCGLCIVACPEGAITDKTEIAQTINMIKKHRRVYAVVAPAFAGQFGPEVSEEQVKTALLMLGFYDVIEVALGADMITVKEAEEFIRRMDRGDKFMITSCCCPPFVRLARSYSGRIAGMVSDSVSPMVAIARFIKAEDEAAKVVFIGPCIAKKTEAKLPELRDAVDCVLTFEELAAMFEGYKINLKELKVEVPFADASHDGRIYAHTGGVTTAIVSSIKTLRPDIDVKARQGNGIKECKKILDAIEDGTLDANFVEGMACVGGCVGGPGVLIPPEEGAKAVDEFAARS…	[FeFe] Group B	[FeFe] Group B	Evolving	Labile	1	[FeFe]-centre, 2 x [4Fe4S] clusters	None	0.136947	0.0132104	0	0	3.10251	0	0	0	0	0	1.82702	0	0	0	0	0	0	0	0	0	0	0	1.34772	0	0	0	0	0	0	0	0	0	0	0	0	0	0	0.988435	0	0	0
WP_017414827.1	MKEQYSELFQCIIKAYYNGRFEEKINELFQEENIDKQHLAAVISSLCGVGVSLSDNYIEELKEAIRVYELNHKVVNKVKKCGMDCKVDKDGKTRCQESCPFDAILVDEVENTTYISSEKCTDCGFCVEGCPTGSILDRVEFIPLVNLLQGNAPVVAAVAPAIMGQFGDEVTINQLRTAFKTMGFTDMVEVAFFADMLTLKEAIEFDAHVKTKDDFMITSCCCPMWVAMLKRVYEDLVKHVSPSVSPMIAAGRVLKHLNPTVKVVFIGPCVAKKAEIKEPDLLGDIDFVLTFAELKEIFDALEITPSALPETESVEYASRGGRLYARTGGVSIAIAECVERMFPEKYELVNSVQGNGVKECKEMLNNLQKGIMTGNFIEGMGCVGGCVGGPKAIIPRDKG…	[FeFe] Group B	[FeFe] Group B	Evolving	Labile	1	[FeFe]-centre, 2 x [4Fe4S] clusters	None	0.165484	0.104659	0	0	0	1.14643	0	0	0	0	0	0	0	0	0	0	0	0	0	0	0	0	0	0	0	0	0	1.78219	0	0	0	0	0	0	0	1.86489	0	0	0	0	0
WP_018084282.1	MSLVTLTIDGQEVRVPPGTTILAAAKEAGVKIPTLCYLEEINVIGACRLCLVQVEGARTLVASCVAQVSEGMVVHTNTPEVRRARAINMELILSNHPQDCLTCTRSTNCELQQLAAELGVREVRFAGALPPYEPDESSLSLVRDPKKCVLCRRCVAVCDRVQGVNAIDVQERGFATVVAPAFLAPLGDVACVNCGQCSLVCPTAAIREKDQTAEVWAALSDPQKHVVVQTAPAVRVSIGEMFGLPPGSIVTGKLVAALRRLGFDRVFDTDFTADLTIMEEGSEFIHRLQNGGTLPLITSCSPGWIKFIEHFYPGLLPHLSTCKSPQQMFGALAKTYYAQKAGIDPANIFVVSIMPCTAKKFEAARPEMMASGFADVDVVLTTRELGRMLKQAGIDFAAL…	[FeFe] Group A3	[FeFe] Group A3	Bifurcating	Labile	3	[FeFe]-centre, 3 x [4Fe4S] clusters, 1 x [2Fe2S] cluster	NADH dehydrogenase, thioredoxin	0.726334	0.64814	0	2.71411	1.55125	0	0.613694	0	0	0.913421	0.913509	1.89811	1.28922	0	0	0	3.83277	0	0	0	0.578419	0.422315	0	2.08095	0	0.675704	0	0.891093	0.489098	2.01625	0.601135	0	0	0.526666	2.68962	0.932444	0	2.9653	0	0	0
WP_005487095.1	MSKVKLTIDEQTVEVEEDSTLLEAAKKIGINIPILCYHPDLSLHGACRVCVVEDEESGNLLASCATPVRDGMSINTRSMKARKARRRNVELLLANHPNDCLGCDRNGHCELQDLTYELGIKSEDVAKFAGEQSEYELDTVGPALKRDPNKCILCGRCVRICEEVQGVSALQFTDRGFNSIVTTAFDLPQAEINCVNCGQCATVCPVGAITEFSEIDKVWAALEDDDKHVLVQTAPSIQATLGEEFGMETGTIVTGKMVAALRRFGFDQVFSTDFAADLTILEEGSEFLKKLNGEGELPHITSCCPGWVKGAEHNFPDLLKHLSSAKSPMQMFSALSKTYYPEQTGVDPEKIYTVAIMPCTAKKFEKDREEINGSDFKDTDAVLTTREFARMIKEMGIDF…	[FeFe] Group A3	[FeFe] Group A3	Bifurcating	Labile	4	[FeFe]-centre, 3 x [4Fe4S] clusters, 1 x [2Fe2S] cluster	NADH dehydrogenase, thioredoxin, thioredoxin	0.142628	0.0770594	0.604674	0	0	0	0	0	0	0.913421	0	0	0	0	0	0	0	0	1.76515	0	0	0	0	0	0.309421	1.35141	0	0	0	0.672082	0.200378	0	0	0	0	0	0	0	0	0	0
WP_011877994.1	MATVTLTIDNVKVEVEQGSTILDAAKKIGINIPTLCYMKEINAIGACRICVVEVVGARALQAACVTPATEGMVVKTNSAAVRASRKMTLELIQSNHPQECNTCLRNNNCELQALSEAMGLKEVRFIRPSQSHSKDDIDNSSPSIVRDPRKCILCRRCVAVCEKVQGVKCISAVNRGFETTIAPPFNQGLFDVNCTMCGQCTLVCPTGAITEVDDTGKVWRALDDSTKHVVVQTAPAVRVAIAEEFGMEPGTVSTGKLVAALRRLGFDSVMDTDFAADLTILEEGNEFIKRVTEGGVLPMITSCSPGWIKYIEMYYPDLLAHLSTCKSPQQMFGALVKSFYAEKKAIDPANIVSVSIMPCTAKKFEAQRDELRDSGYQDVDIVLTTRELARMLREIGIDW…	[FeFe] Group A3	[FeFe] Group A3	Bifurcating	Labile	3	[FeFe]-centre, 3 x [4Fe4S] clusters, 1 x [2Fe2S] cluster	NADH dehydrogenase, thioredoxin	0.341757	0.251354	0	0.904703	3.10251	0.573215	0	0	0	4.5671	0	0	0.644611	0	0.677647	0	0	0	0	0	0	0	0	0	0	0	0	0	2.93459	0	0.200378	0	0	0	0	0	0	3.95374	0	0.613512	0
WP_014423937.1	MPRSYQENELSSIIRIDETKCKGCDTCKSFCPADAIDGPYGANHRINSDRCLQCGQCLVNCPFGAIEDTADVVDQVIEKLQDGKTTVVATVAPAVRVALGEEFGMEPGKLITEQMYGALKQAGFKIMDVNFAADNTILEEGTELIHKIQKYVLNKPVTEELGPLPQFTSCCPAWVRYMELYHPDLRQHLSSAKSPQGMAGPVAKIYGAKEIWKVEPERIFCVGVYPCTAKKLEASRPEFTAAADYWKKQGHTAAYQDTDVVLTTRDLARLLKKLDIDIRNVQPAEEKDNPLAEYTGAGTIFGATGGVMEAALRTAYFVLTGQELADLDYEPVRGLDEVKSAEIPLKLKDGGQEITLKIAVVHGTKNVEPLLAEIKAGKSSYHFIEVMNCPGGCVNGGGQ…	[FeFe] Group A1	[FeFe] Group A1	Evolving	Labile	3	[FeFe]-centre, 2 x [4Fe4S] clusters	Small subunit, cytochrome b	0.101666	0.0211461	0	0	1.55125	0	0	0	0	0	0	0	0	0	1.35529	0	0	0	0	0	0	0.422315	0	0	0	0	0	0	0	0	0	0.644305	0	0	0	0	0	0	0	0	0
WP_027398115.1	MGIIQFKKANCKHCYKCVRKCYVKAIALKDEQAQIIERECILCGQCFLVCPQNAKYIKTDIYKIKNYIKRGEKVYVSLAPSFASAFDGISFRVMSSALKRLGFMGVEETAIGAGMVTAEYEKILKSGKMRNMITTCCPTVNLLIENYFPDLLQYAAPVVSPAIAHGQVLKKVYGKDIKVVFVGPCISKKYEAEKSISINATLMFDELLNWLEEENISLNKLDENPTEMHGIVNRLYPIPGGILKTVSNDSKKTYKSIAVDGLDRCIQMLEALREDLYARKEIKGYFIEMSACPGSCSYGPALKDYDKPLLLARENIIENARKCTHTKIPKTETEKVDLFYEYENLQAPEDLPSEDELNAILESMGKTSEKNIYNCGACGYDTCREKAIAVWQGKAEIKM…	[FeFe] Group C	[FeFe] Group C3	Sensory	Labile	3	[FeFe]-centre, 2 x [4Fe4S] clusters, PAS domain	Phosphatase, thioredoxin	0.396748	0.385641	0	2.71411	0	0.573215	0	0	0.576106	0.913421	0.913509	0	0	0	0	0	0	1.29292	0	0	0	0.281543	1.34772	0	0.618842	0	1.93537	0	0	0	0	1.93292	0	0	0	0.932444	0	0	0	0.613512	0
WP_015759215.1	MPQVQEYTPGPVIEGAGHLFEKDEKNLEKVRLFIDGKEVTALKGISVLEAARSVGITIPSLCYLKGINEIGSCRVCMVEVEVNGVMTLQASCVYPVAEGIRVYTNTPQARRVRRTMVELLLSDHHRECTACIRNLNCELQNLADDLGIRNIKYTGETNYVPIFANNPFIMRDYNKCIKCRRCEAICSKVQEVNVYSALGRGFEVKIAPAFIQDLSAVACITCGQCVIACPTGSLVEKECIEEVWDALADKDKYVVVQTAPSIQVTLGESFGLPVGTIVTGKLVSALRRMGFDKVFATDFTADLTIMEEAHELLDRLNGHGRLPLLSSCSPGWVKFCEHFYPEFTENMSTCKSPHEMFGALTKTYFAEKEGLDPEKIVVVAIMPCTAKKYEASRPEFGNK…	[FeFe] Group A3	[FeFe] Group A3	Bifurcating	Labile	3	[FeFe]-centre, 3 x [4Fe4S] clusters, 1 x [2Fe2S] cluster	NADH dehydrogenase, thioredoxin	0.0682355	0.0101283	0.604674	0	0	0	0	0	0	0	0	0	0	0	0	0	0	0	0	0	0	0.140772	0	0	0	0	0	0	0.489098	0	0	0	0	0	0	0	0	0	0	0	0
WP_018661973.1	MGYTIPIGPYHPSLEEPIHAKLYTEGEVIKDAEVFIGYNHRGIEKLATERNFIQTLTLVERVCGICSHSHPFTYAMAIENIAQMEVPKRGQYIRVIMAELERLHSHYLWIGLACHLIGYDSLFMYVWDAREKVMDILEEISGNRVNYGMVIIGGSRRDINDEMRRKVLKMLDDLNEPHNRMKEIFLNDKTAALRTKGVGVLPKDVAERMGTIGPHARASGIRVDVRKDAPYSCYDEFDFDIPVLEDGDVWARVVVRVLEIEESVKIIRQALENLPEGPINLGNKLPKVPAGEFTARHEAPRGQVIYYVVTDGGQTNYRISIHVPTFKTAPTVPYMLKNNTVADAGLIIASIDPCFSCLDR	[NiFe] Group 4d	[NiFe] Group 4g	Evolving	Sensitive	6	[NiFe]-centre, 1 x [4Fe4S] clusters	NuoL, NuoH, NuoC, [FeS] protein	0.823257	0.83074	0.604674	0	3.10251	8.59822	0.613694	1.59151	0.576106	1.82684	0	0	2.57845	0	1.35529	0	0	0	0	0	0	0.422315	2.69545	0	1.23768	1.35141	0	0.891093	0	0	0	2.57722	0	0	0	0	0	1.97687	0	0	0
WP_008410113.1	MGLIYTGARCRDCYRCIKTCQLKAIRMNSNGAQGRLHAQVIDELCVHCGQCILACPQQAKKPVSDLKQVQQLISQGTPVVAVVAASFVSALPLPNPDVLPTLLRELGFAEVQETSVGAGLVTKKYLELGFAQPLIVSYCPVVVNLIERHYPELIPMLAPVVSPMVAQGRIIKSLNPDASVVYIGPCAAKRDEAQLLGLNDTVDYFLGFNELWAWAQTAGIAVEKLSPGSFQSFSPCHNRIYPVEGGMIWTVADELREAGENFITMSGLDNCIEFLKHLSRQTIVNPPKLMELWACKGGCINGPLSLCLEESLFMRQRKLLEYYNSSGECDFAIDNYKLPEIDLGRSFKNRKINLPLPSEAEIKAILARTGKHTPAQEFNCGNCGYDSCRAKAVAVYQGK…	[FeFe] Group C	[FeFe] Group C3	Sensory	Labile	2	[FeFe]-centre, 2 x [4Fe4S] clusters, PAS domain	Phosphatase	0.0708685	0.00311054	0	0	0	0	0	0	0	0	0.913509	0	0	0	0	0	0	0	0	0	0	0.140772	0	0	0	0	0	0	0	0	0.200378	0	0	0	0	0	0	0	0.540998	0	1.83573
WP_006352890.1	MPIGTNVKGKMVAALRRLGFDKVFDTDFGADLTIMEEANEFIERVQNGGKLPMITSCSPGWINYCEHYFPDMLDNLSTCKSPQQMTGAMIKTWYAEQNGLDPKDIVVVSIMPCTAKKYEIHRADQDAAGYPDIDIVLTTRELARMINRAHINFTDLPDEEFDPALGITTGAGAIFGATGGVMEAALRTAADWITGKDLSVIDYYTDVRGTDGIKTATYDIKDLTIKVGVASGLANAKELLNRVREGEHFDFIEIMCCPGGCVNGGGQPLQPSSIYNFTDLKTKRAKALYDEDKELPIRKSHKSPIIEKLYKEYLEKPGSHKAHELLHTSYSAKVKPVK	[FeFe] Group A3	[FeFe] Group A3	Bifurcating	Labile	4	[FeFe]-centre, 2 x [4Fe4S] clusters	NADH dehydrogenase, thioredoxin, thioredoxin	7.21255	8.56646	4.23272	10.8564	9.30752	6.30536	4.29586	4.77453	4.60884	11.8745	3.65404	3.79621	6.44611	0	2.03294	0.62825	11.4983	2.58584	1.76515	1.97418	10.4115	12.3879	1.34772	8.32381	9.28262	8.78415	7.74147	8.91093	5.38008	6.04874	3.00567	6.44305	1.15221	0	5.37923	3.72977	3.04252	5.93061	2.70499	19.6324	1.83573
WP_004007712.1	MAEKVVIDPFTRIEGHLRIEMETEGKQIKKAWSVSTQFRGIETIVQNRDPRDVWAFVQRICGVCTSVHAIASISAVEDAIGSNPPENARLIRSLVLGSQEIQDHVIHFYHLHALDFVNVVNAAKADPQKTLEFAHSIGSKWRGNNLKRFTEVRDTVKQILESGQLSIFTGGYWDHPDYRLPPEADLMCVAHYLDALEFQRSMIRICTVFGGKNPHPNFLVGGMACSIDPNSSESINQVQMDQIKTWIDEIIEFVNDCYYPDVLAIAGVYKDYFDIGATHPNYLAVGLAGSIFSGDPNKSRISSAHTAIKPGVILGGDITKVHPFDPHKIEEYISSAWYEYSVGDDKPLTPDKGETTVKYTGPQPPFEWLGDNDKYTWSKAPRYDGKPMQVGPIARMILA…	[NiFe] Group 1f	[NiFe] Group 1f	Anaerobic Uptake	Unknown	3	[NiFe]-centre, 2 x [4Fe4S] clusters, 1 x [3Fe4S] cluster	Cytochrome b	0.184768	0.00938211	0	0	0	0	0	6.36604	0	0	0	3.79621	0	0	0	0	0	0	0	0	0	0	0	0	0	0	0	0	0	0	0	0	0	0	0	0	0	0	0	0	0
WP_007560478.1	MAFTNNVMIVRHKLLENLVALWKENQLVEKIDRIPLEISPRRSQPVGRCCIHKERAVTKYKLLPLLGWDMTDETDELTPLSEYARKTLERKERIKENILCVIDEACSSCVQVNYEVSNLCRGCVARSCYMNCPKGAVHFNKKTGQAQIDHDKCISCGICHKSCPYHAIVYIPVPCEEACPVKAISKDEHYIEHIDESKCIYCGKCLNACPFGAIFEISQVFDVLEAIRKGEQVIAIPAPSVLGQFKATIEQVYGALKEIGFADVIEVAEGAMHTTSNEAHELLEKLEEGQKFMTTSCCPSYIELVNKHIPDMKPYVSSTGSPMYYAARIAKKKYPNAKVVFIGPCIAKRKEAQRDECVDYVLTFEELHPMFRGLGIELEQANPYKVAYESVCEAHGFAQ…	[FeFe] Group B	[FeFe] Group B	Evolving	Labile	1	[FeFe]-centre, 3 x [4Fe4S] clusters, 1 x [2Fe2S] cluster	None	16.0005	14.1165	4.83739	16.2847	13.9613	5.15893	2.45477	152.785	4.03274	10.0476	5.48105	13.2867	10.3138	12.0429	0.677647	1.2565	7.66555	3.87876	5.29544	1.97418	1.73526	10.4171	5.3909	4.16191	7.73552	8.78415	4.83842	0	4.40189	2.01625	13.8261	2.57722	0	0	1.34481	2.79733	0.608504	0	1.082	15.9513	0.917866
WP_027175156.1	MSGCKAKAAPVMATPKSNYTGPVVVDPVTRIEGHLRIEVQVENGVVKDVRSSSQLFRGLEIILKGRDPRDAQHFTQRSCGVCTYVHALASTRCVDNAVKVKIPDNARLMRNLVLAAQFMHDHIVHFYHLHALDWVNVANALKADPVKAAKIANSISPRPTTAEGLKAVQDKVGALVKSGQLGIFTNAYFLGGHEAYYLPAEVDLIATAHYLEALHLQVKAARAMAIYGAKNPHTQFTVVGGVTNYEGLKPERFAEFAALYKEVKAFIEQVYIPDLIAVAGYYKDWAGIGAGCKNYLSCGDFPDVEGNLDSNWMAPGVLYGADLTKIDKMDGTKITEAIKHSWYKGNQAPLHPYKGVTDPQYTSLNDKERYSWMKAPRYDGKPMEVGPLAQVLVAYAKGV…	[NiFe] Group 1b	[NiFe] Group 1b	Anaerobic Uptake	Sensitive	3	[NiFe]-centre, 2 x [4Fe4S] clusters, 1 x [3Fe4S] cluster	Cytochrome	0.0722714	0.00889103	0	0.904703	0	0	0.613694	0	0	0	0	0	0	0	0	0	0	0	0	0	0	0	0	0	0	0	0	0	0	0	0	0	0	0	0	0	0	0	0.540998	0	0
WP_012414922.1	MREILKLKKSNCKNCYKCIRHCPVKSIRVSGNQAHIINDECILCGQCFVVCPQGAKQIESDIEKVKVMLYGKEPVIASLAPSFIANYGGAGIKSLSKALKKLGFHSAEETAIGATMVKNEYENILAKKEHDILISSSCHSVNLLIQKHFPSALKYLANVMSPMQAHCRDIKKRYPGAKTVFIGPCVSKKDEAQRYPDIVDAVLTFEELTQWFKEEKITVEPEKNKTAEGKARFFPTSGGILKTMRGTAKKGEYKYIAVDGTEACIDALNDIKDGNIFRCFIEMSACKGSCIGGPIMEKYNRSPIKGYMQVAAYAGEKDFKVEDYSGKITQKRNPLHFNKKEIPPHEIEEILKQMGKTKPEHELNCASCGYNTCREKAAAVYLGNANISMCLPFLKDKAE…	[FeFe] Group C	[FeFe] Group C3	Sensory	Labile	2	[FeFe]-centre, 2 x [4Fe4S] clusters, PAS domain	Phosphatase	6.94862	8.23248	3.62804	5.42822	10.8588	5.73215	0	1.59151	6.33716	12.7879	24.6647	3.79621	0	3.01073	14.2306	0	3.83277	1.93938	1.76515	0	4.62735	9.57248	18.8681	2.08095	19.8029	5.40563	8.70916	12.4753	8.80377	12.7696	3.40643	5.79875	0	0	6.72404	0	3.65102	9.88435	1.082	15.9513	0.917866
WP_011640436.1	MVNLTIDGIKVSVPEGSTILQAASEVGIKIPTLCFHPDQSIKANCRVCVCEVEGNRLLQAACAMPVFEGMVVKTRTPKVLDARKTILELILSNHPQDCLNCIRNGNCELQDLAQEYCIRENPFEYKVRGFAKDFSTPSLFRDQDKCILCRRCIEACSVIQSVNALGMEGRGYNSMVVPTLGKALIDSPCVMCGQCIHACPVGAIGEREQIDEFLAAVANPDKVVITQIAPAVRVAIAEEIGMMTGELPMGTFVQGLRQIGFDHVLHTNFTADLTILEEGNELLKRLKEGGTLPMFTSCSPGWINFCETFYPDLLDNLSTCKSPQQMFGALAKTYWAEKMGIDPSKIYSVSIMPCVAKKFEAARPEMNDSGYQDVDLVLTTREIGRLFRMSGLDFSKLPA…	[FeFe] Group A3	[FeFe] Group A3	Bifurcating	Labile	3	[FeFe]-centre, 3 x [4Fe4S] clusters, 1 x [2Fe2S] cluster	NADH dehydrogenase, thioredoxin	0.485484	0.46679	0.604674	0	0	1.14643	0	0	0	1.82684	2.74053	0	0	0	0	0	0	0	0	0	1.15684	0.422315	1.34772	0	0	1.35141	0	0	0	0	0.801513	0	0	0	0	0.932444	0	1.97687	0	1.84054	0
WP_015358633.1	MSEMVTLTIDGVEVKAPAGSTVLEAAKLAGIRIPTLCYLKGINEIGACRICVVDVGARSLQAACVYPVSEGLKVVTNSPKVREARKVTLELILSNHERTCLTCVRSGNCELQQLANELNVGEIRFDGERTDLPVDDLSPSVVRDPNKCVLCRRCISVCNNVQSVAAIGTAERGFKTVIASPFNMALKDTPCVNCGQCINVCPVGALREKSSIEKVWDALANPDLHVVVQTAPAVRVAIGEEFGLPIGTRCTGKMVAALKRLGFDKVFDTDTGADLTIMEEGNELIQRIKNGGKLPMITSCSPGWIKFCEHNYPDLLDNLSTCKSPQNMFGALLKSYYAEKMGIDPSKIFVVSVMPCTAKKFEIQRPELASTGYPDVDVSITTRELARMIKEAGIDFVNL…	[FeFe] Group A3	[FeFe] Group A3	Bifurcating	Labile	4	[FeFe]-centre, 3 x [4Fe4S] clusters, 1 x [2Fe2S] cluster	NADH dehydrogenase, thioredoxin, thioredoxin	4.81743	5.49694	3.02337	1.80941	18.615	9.74465	4.29586	1.59151	6.91327	9.13421	4.56754	11.3886	7.09072	0	4.06588	0	3.83277	2.58584	1.76515	0	1.73526	4.08238	6.73862	4.16191	5.879	8.10845	2.90305	11.5842	7.82557	5.37666	0.400756	2.57722	0	3.15999	6.72404	1.86489	3.65102	1.97687	5.95098	9.20268	2.7536
WP_019225928.1	MVNLRINNKSVSALEGATILEAAKQNNIHIPNLCYLEGVHKFGSCRLCVVEVEGAKSLQPSCMVTVREGMVVKTNTEKVRKARKVLYELILSDHPKDCLNCERNQSCELQEMGNMLGVSEARFEGKRSAGCIDKSPSITRDMSKCILCRRCITVCNEIQQVGILNAQNRGFKTVVGPAMDLPINSVNCAYCGQCTVVCPVGALKETDAIQDVWQAINDPNKRVVVQVAPAIRAAIGEEFGLEPGTLVTGKLASALRELGFDDVFDTNFTADLTIMEEGTEFLTRVKNVLTGGQAALPMITSCSPGWIKYVEHAYPEELDHLSTCKSPHTMLGALAKSYYADKIEVDPKDMYVVSIMPCTAKKFEISRPEMQNNGVPNVDAVLTTRELAKMIKEAGIDFV…	[FeFe] Group A3	[FeFe] Group A3	Bifurcating	Labile	3	[FeFe]-centre, 3 x [4Fe4S] clusters, 1 x [2Fe2S] cluster	NADH dehydrogenase, thioredoxin	0.334128	0.203375	0	0	0	0.573215	0.613694	0	0	0	0.913509	0	0	3.01073	0	0	3.83277	0.646459	1.76515	0	0	0	0	0	0.928262	0.675704	0	0	1.4673	0	0	0.644305	0	0	0	0.932444	0	0	0	0	0
WP_003020884.1	MIMGFMTIDGRKVEFTDEKNVLSVIRKAGIDLPTLCYHSELSTFGACRLCTVEDDRGRTFASCSEEPRDGMVIYTNSGRIKKYRKMIVELLLSAHCRDCTTCVKSGECKLQELAHRMNITTVRFQNTREEKPLDTSSPALIRDPNKCILCGNCVRACRELQGLEVLGFTHRGTDAMVTPAFDKPLSETDCVSCGQCRVFCPTGAISIRTNMDEVWDAINDPDTRVIAQVAPAVRVAVGDAFGLTKGHSVMGKLVAVLHRMGFDEVYDTTFAADLTIMEESKEFLNRVEKNEKLPLLTSCCPAWVKFVCDQYPEFKDNLSTCRSPQGMFSAVIKEYYKNPERSQNKKTFVVSIMPCTAKKMEILRSNNFTHGEQDTDIVLTTTEIIRMINNSGIDFASQE…	[FeFe] Group A3	[FeFe] Group A3	Bifurcating	Labile	3	[FeFe]-centre, 3 x [4Fe4S] clusters, 1 x [2Fe2S] cluster	NADH dehydrogenase, thioredoxin	40.3511	55.6988	13.9075	13.5705	7.75626	14.9036	49.0955	17.5066	38.023	17.355	31.9728	26.5735	119.253	24.0858	21.007	7.539	22.9966	21.9796	26.4772	29.6126	52.0577	20.5527	10.7818	24.9714	3.71305	12.8384	22.2567	102.476	41.0843	43.6853	4.40832	20.6178	51.8493	464.519	33.6202	61.5413	45.0293	27.6762	74.6578	11.0432	44.9755
WP_016314690.1	MDTVKLWIDDIETEVPKGTTVLQAARGLGIHIPTLCHLQGMNHPSSCRVCLVESGPRLIASCTLVAEDGMRIRTNTPRVRKARKTTVELILSDHHRECLTCLRSGTCELQEVANQIGVRDVRYAGGQARSTVDFSSPSIVRDTSKCLLCGRCVSVCSEVQTVGAIGFMNRGFNTVIGPALGRPIGESVCVNCGQCIMACPVGALQERENVGDVWQAIADPHKFVVVQTAPAVRVALGEEFGMPIGTRVTGKMVAALRRLGFNKVFDTDFAADLTIMEEGTELMHRLATGENLPLMTSCCPGWVKFVEHFFPDMRENLSSCKSPHEMEGAMIKSYFAQMMGIDPGNLVVVSIMPCTAKKFEAQREELAHESFPDVDYVLTTRELARMIKEAGIDFVNLKG…	[FeFe] Group A3	[FeFe] Group A3	Bifurcating	Labile	4	[FeFe]-centre, 3 x [4Fe4S] clusters, 1 x [2Fe2S] cluster	NADH dehydrogenase, thioredoxin, thioredoxin	0.395788	0.462958	0.604674	0.904703	0	0	0	0	2.30442	0	0	0	1.28922	0	2.71059	0	0	0	0	0	0	0.563087	2.69545	0	0.309421	0	0.967684	0	0.489098	0	0.200378	0	2.30441	0	0	0	0	0	0	3.06756	0
WP_015738331.1	MEVEKLLEEALKQKEVTRRTFLKMMAGLGLAGLAGSVGGCLRQHQVAAGGEGWLPYQYDVAGTWPAHVRGRVPIDPNNPSIMRDDRKCVLCGQCLEICHRVQSVYGYYELPIRDDIVCINCGQCSLACPTGAIQERDDTEKVLKALKDPNKFVVVQTAPSIRVALGEEFGMPPGTWVAGKMVAALRRLGFNAVLDTNFAADLTIMEEATELIKRIKGELPGRPLPQFTSCSPGWVKFCEYFYPDLIPHLSSCKSPQQMFGATVKTYYAEKRGIDPRKIVSVSIMPCTAKKFEAQRPEMISAKKYWEKKDPKIAEGVTRDVDIVLTTRELAKLIKQAKIDFPRLPDEDFDPLMGKCTGGAIIFGASGGVMEAAIRTAYFFITGKEPPQQLLDLKPVRGLA…	[FeFe] Group A3	[FeFe] Group A3	Bifurcating	Labile	3	[FeFe]-centre, 2 x [4Fe4S] clusters	NADH dehydrogenase, thioredoxin	0.46184	0.424639	0	0	0	1.14643	0	1.59151	0	0	6.39456	0	0	0	0	0	0	0	1.76515	0	0	0.140772	1.34772	0	0.618842	0	0	0.891093	0	0.672082	0.200378	0	0	0	0	0.932444	1.82551	0	0	0.613512	0
WP_004613839.1	MRGLETPIRRIRRQVFTKVAKLAFESTPETLIDDIEAVPYELINEDTEKYRESIYRSRAIVRERMRLAMGMSLRPEDKPVHLTAGIEESNISEKYYEPPLMQVIPSACAACEEKGYEVSDMCKGCVAHPCREVCPVGAISMKKGRSYIDQEKCIKCGKCKSVCPYDAISKKERPCAKACGVNAIGSDKMGRAHIDNDKCVSCGMCMVSCPFGAISDKSQIFQLGRALKEGGEIIAEIAPAFVGQFGPNITPRHIKAALQELGFAEVYEVALGADIGAIAEAHHYVEKVVTGELPFLLTSCCPAWSMLAKKYFPDLADQVSQELTPMVATARTIKLEHPNAKVVFIGPCASKKLEASRRTVRSDVDFVITFEELQAMFDAREIDLTEYEAESSFHDATGA…	[FeFe] Group B	[FeFe] Group B	Evolving	Labile	1	[FeFe]-centre, 2 x [4Fe4S] clusters	None	24.1388	44.8469	25.3963	8.14233	18.615	25.7947	39.2764	11.1406	41.4796	27.4026	23.7512	18.9811	58.015	12.0429	42.0141	14.4498	11.4983	11.6363	30.0075	15.7934	45.1167	34.0668	16.1727	22.8905	21.35	15.5412	31.9336	57.03	16.1402	18.1462	14.828	37.3697	16.1309	63.1999	13.4481	19.5813	16.4296	16.8034	15.1479	24.5405	32.1253
WP_004064152.1	MKVMNELLNTADKLIYTNDKCTGCNKCVRVCPTLVSNIAQEGKIWVNRDSCIACGACLDACGHDARSYHDDTQQFFSDLKSGRKISVIIAPAFLANYPKEYKRVLGYLKSLGVNHIYSVSFGADITTWGYLKYITENNFKGGISQPCPAVVDYVEKYIPELLPRMMPVQSPMMCMAIYIKKYLKLTDDLAFISPCIAKKVEIEDKNNHGYVKYNVTFLKLMQHIGRDYTKSPEYTDELEYGLGSLYPMPGGLRENVEHFLGKEQVVRQVEGEREAYHYLQEYLKRVKSKAQLPLMVDILNCSKGCIYGTATDPAKNTDDVLLTLSKMRAMDKQEIHGKGPFRKTNKSPWSQQSTPKERMANLMEAFHELNLTDFIRKYDTSKQIKVNEPSAGELDEIYR…	[FeFe] Group C	[FeFe] Group C2	Sensory	Labile	1	[FeFe]-centre, 2 x [4Fe4S] clusters, PAS domain	Fusion with methyl-accepting chemotaxis protein	43.7458	59.343	17.5355	10.8564	48.0888	13.7572	23.9341	35.0132	50.6973	10.961	41.1079	102.498	1.28922	27.0966	49.4682	120.624	65.1572	93.0901	33.5378	51.3286	120.89	48.1439	26.9545	95.7238	33.4174	18.244	43.5458	8.01984	9.29287	110.894	30.2571	19.9735	41.4794	111.126	96.8262	66.2035	3.65102	21.7456	2.70499	11.6567	39.4683
WP_021434166.1	MSLVNLTINGKNISVENETTILDAAKNLNIKIPTLCHLHMDEINMHNKCASCRVCMVDTKRGLVPACATNVKEGMEVQTNTPRALNARRTVVELLLSDHPQDCLVCDKNGNCELQTIAHDLGVRNISYQGEKTNLGIDNSSKSIVKNHDKCILCRRCETMCSEIQKVGVLSGVNRGFETMVSTFFNEDMAKTNCSFCGQCVAVCPTGALSEVNNIDLVWDEINNPKKTTVVQVAPAVRVALGEEFGLAPGTITTGKMVSALKLLGFTYVFDTNFAADITILEEASEFINRLKENKNLPILTSCCPAWINYLEHHYPECLNLASSCKSPQNMFGAIAKNYFTSKINISPKDITVVSVMPCIAKKYEVSRTELGNDGILDVDVSITTRELAKMIKESGIDF…	[FeFe] Group A3	[FeFe] Group A3	Bifurcating	Labile	3	[FeFe]-centre, 3 x [4Fe4S] clusters, 1 x [2Fe2S] cluster	NADH dehydrogenase, thioredoxin	3.64861	10.198	4.23272	0	0	0.573215	3.06847	30.2387	1.72832	5.48052	0.913509	3.79621	2.57845	0	0.677647	0	0	0	1.76515	3.94835	4.04893	0.281543	0	0	0	0	0	0	0	3.36041	0	4.51014	53.0015	14.22	0	1.86489	19.4721	19.7687	0.540998	4.29459	0
WP_007049858.1	MINLTVDNIEVKVKEGTTILEAAKKAKIEIPTLCYLKDLNRPASCRMCMVDVGGKLLPACVTHASEGMEVKTHTKRLRNIRKTILELTLANHNCECTTCEKSGNCKLQTMANKYLTGPGEFEVEFEKGIDNSFSAVTRDLSKCIKCNRCVSMCSDKVGASAISLINRSEETTVATPFNIPIIHSDCIGCGQCITVCPTGALIERGTTEEIYDLLGEDTYYNICLLSHGTYETLAEGVGVDNALMKAKVVDVLNKLGFSEVIDYEEYLIKEMNAVAYLLKENMLEGKPLIYSCSSGIRREIEDVYPEADDLFVNLSKIRKDINTRFKEGYLDRNIDKDVHLTRVENCTAFLPETNETSGIDISITTRQLAKLIKTSGIDLNKADNKPLDNLDYTGVFNPY…	[FeFe] Group A3	[FeFe] Group A3	Bifurcating	Labile	3	[FeFe]-centre, 3 x [4Fe4S] clusters, 1 x [2Fe2S] cluster	NADH dehydrogenase, thioredoxin	1.72141	1.99754	0.604674	0.904703	0	1.14643	0	0	1.72832	0	0	1.89811	0	0	2.71059	1.2565	3.83277	0	5.29544	0	2.31368	0.563087	0	2.08095	0	2.02711	1.93537	10.6931	1.95639	4.03249	0.400756	2.57722	1.15221	0	1.34481	1.86489	0.608504	0	3.78699	0	0
WP_008152383.1	MAFTNNVMIVRHGLLAKLVKLWKENRLLEEIDRLPIELSPRKSKVIGRCCVHKERAVWKYKTLPLLGFDMQDEVDELTPLSEYAKQALLRSENKKENLMCVVDEACSSCVQVNYEITNLCRGCVARSCYMNCPKDAIRFKKNGQAEIDHDTCISCGKCHQNCPYHAIVYIPIPCEEVCPVKAISKDEYGVEHIDESKCIYCGKCVNACPFGAIFEISQVFDILQRLRNKEPMVAIVAPSILAQFAAPVEKVYGAIKSLGFLEVVEVAQGAMETTRREAEELKEKLAEGQPFMTTSCCPSYIQLAEKHIPDLKKYISTTGSPMYYTARIVKEKYPDAKIVFVGPCVAKRKEVKMDPCVDFTLTFEEIGSVLTGMDIKVEEAQPFSVLFNAVREAHGFAQT…	[FeFe] Group B	[FeFe] Group B	Evolving	Labile	1	[FeFe]-centre, 3 x [4Fe4S] clusters, 1 x [2Fe2S] cluster	None	17.6907	48.6554	7.86076	66.0433	18.615	1.71964	6.13694	1.59151	0.576106	14.6147	2.74053	47.4526	19.3383	3.01073	21.6847	1.2565	42.1605	11.6363	5.29544	0	0	47.1585	10.7818	6.24286	51.0544	7.43274	16.4506	3.56437	7.33648	2.01625	30.6579	0	3.45662	0	0	0	0	1.97687	1.082	15.9513	0.917866
WP_021876669.1	MKNIIIDGKKIEAKDDQSILKIAKENGIEIPALCFLEECNNIGQCGTCLVEIEGQERLARACCVKPKEGDVISTNSERVQEEVKKTVSALLDKHEFKCGPCKRRENCEFLKLVIKTKGRASKPFVVADKSEYIDDRSKSIVLDRTKCVNCGRCVAACRVKTGTRAITFQKVNDERIVGPENLKCFDDTNCLLCGQCVAACPVDALSEKSHTERVKDALENPEKHVIVAMAPAVRTSMGELFKMGYGVDVTGKLYTALRKLGFNKIFDINFGADMTIMEEATELIQRIKANGPFPMFTSCCPSWVRQVENYYPELLENLSTAKSPQQIFGAASKTYYPETYDIDPSRVFTVTVMPCTAKKYEADRKEMQNNNLRNIDAVITTRELAKLIKEAKIDFANLE…	[FeFe] Group A1	[FeFe] Group A1	Evolving	Labile	1	[FeFe]-centre, 3 x [4Fe4S] clusters, 1 x [2Fe2S] cluster	None	0.156886	0.183059	0	0	0	0	0	0	0	0.913421	0	0	0	0	0	5.65425	0	0	0	0	0	0.140772	0	0	0	0	0	0	0	0	0	0	0	0	0	0	0	0	0	0.613512	0
WP_007656801.1	MEDTKFYHALKIDKERCIGCTHCMTKCPTRAVRIRDGKAVIRKDWCVDCGECLKACPTEAIYVEQDDFQKIFDYECRVALVPTVFIGQFSKYTTEEEIFSALYELGFTHVYQVEFTADMIHREMLRQMEQAEEKPVISSFCPAIVRLIQIRFPALVDNILLVKSPVNATATYYHQVLTEEGHSPDQIGLFYVTPCAAKIAALKSADGYSSTINGVINMDTLYNKVYHILQNRPKGYKPDCVLPPTLTKKEMRWSQTGGEAKHFSGRCLAIDEIHNVIDFLERMETTTEVRNVDFLELRACDRSCAGGVLAVANRFLTAERIMKRSMKRDKAPLIYASERLGALAYLKQHITIRPLQPNPKLLYDGSIEEVLKKMEQVRRLMCYLPGIDCGACGNPNCQS…	[FeFe] Group C	[FeFe] Group C1	Sensory	Labile	2	[FeFe]-centre, 2 x [4Fe4S] clusters, PAS domain	Histidine kinase	5.14308	15.4413	4.23272	10.8564	4.65376	1.14643	0	0	1.72832	46.5845	3.65404	13.2867	3.22306	3.01073	0	0	0	0.646459	1.76515	0	0	5.77164	0	0	22.5877	1.35141	0	0	0	0.672082	13.4253	0	0	0	0	0	0	3.95374	0	1.22702	0.917866
WP_003514900.1	MKTLENHNRIKVTVNGREIEVYDNLTILQALLQEDIHIPHLCYDIRLERSNGNCGLCVVTLISPDGERDVKACQTPIKEGMVICTNTPKLENYRKIRLEQLLSDHNADCVAPCVMTCPANIDIQSYLRHVGNGDFEAAIRVIKERNPFPIVCGRVCPHTCESQCRRNLVDAPVAINYVKRFAADWDMARPEPWTPEKKPPTGKKIAIVGAGPSGLSAAYYSAIKGHDVTVFERQPHPGGMMRYGIPEYRLPKAILDKEIEMIKKLGVKIMTEKALGIHIRLEDLSKDFDAVYLAIGSWQATPMHIEGEKLDGVWAGINYLEQVAKNVDIPLGDNVVVIGGGNTAIDCARTALRKGAKSVKLVYRRTREEMPAAPYEVEEAIHEGVEMIFLMAPTKIIVK…	[FeFe] Group A1	[FeFe] Group A1	Evolving	Labile	1	[FeFe]-centre, 3 x [4Fe4S] clusters, 1 x [2Fe2S] cluster	None	7.00653	8.87786	9.07011	3.61881	0	11.4643	4.29586	6.36604	7.48937	1.82684	7.30807	3.79621	9.66917	0	8.13176	1.88475	15.3311	7.11105	5.29544	3.94835	5.20577	7.4609	9.43407	14.5667	8.66378	4.72993	5.8061	5.34656	3.42369	8.73707	5.00946	11.5975	6.91323	5.26666	8.06885	8.39199	3.04252	0	4.86898	6.74863	7.34293
WP_006062526.1	MATERVVIDPLTRIEGHLRIELECDDNQIKNAWSESTQFRGIETIVEGRDPRDVWAFVGRICGVCTGTHSVASVTAVEDAIGSNPPKQAQLIRDLVMASQEIHDHVVHFYHLHALDWVNVVSAADADPAKAVEFAKSINSTWKGNTETQFAKVRDTIRGVLDSGQLSIFTGGYWDHPDYRLPPEANLMAVSHYLDALQFQRSIIRINTIFGGKNPHPNFLVGGMACSIDPDKSETVNQVQLDQMGVWVNEILDFINGCYYPDALAIMSVYKDYFDIGASSPTFIAAGMGGARYEGGTERPVSSGHTDIKGGVIMDGDYTTVHPLDPKKIKEYISSAWYTYTEGDDAGVTPDVGETTVRYTGPKPPYDWLADNDKYTWSKAPRYDGRPAQVGPIARVLVA…	[NiFe] Group 1f	[NiFe] Group 1f	Anaerobic Uptake	Unknown	3	[NiFe]-centre, 2 x [4Fe4S] clusters, 1 x [3Fe4S] cluster	Cytochrome b	0.126928	0.1651	0.604674	0	0	0	0	0	0	0	0	0	2.57845	0	0.677647	0	0	0	0	0	0	0.140772	0	0	0	0	0	0	0	0	0	0	0	0.526666	0	0	0	0	0.540998	0.613512	0
WP_004608286.1	METMENINLKINGLDVSAPAGSTILEAAHLAGIKIPTLCFLKEINEIGACRMCVVEVKGARNLVAACVHPINEGMEVYTNTPQLIKARKKTLQLLLSNHDKKCLSCVRSGNCELQQLCREYGVDDENFFEGKVNHYELDTSAAHMVRDNNKCILCRRCVAVCEKVQGIGVIGTNNRGFSTMIGSAFEMGLGETSCVSCGQCIAVCPTGALYEKDYTQKILDAIADPDKYVVVQTAPSVRAGLGEEFGYPMGTDVEGKMAAALRRVGFDKIFDTDWAADLTIMEEATELLDRIKNGGVLPMITSCSPGWIKYCEHYFPDMTENLSTCKSPQQMFGAMLKTYFAEKEGIDPKKIVSVSVMPCTAKKFEIGRDDQDAAGVPDVDIAITTRELARLIRRCGID…	[FeFe] Group A3	[FeFe] Group A3	Bifurcating	Labile	4	[FeFe]-centre, 3 x [4Fe4S] clusters, 1 x [2Fe2S] cluster	NADH dehydrogenase, thioredoxin, thioredoxin	15.6869	19.3796	11.4888	9.04703	10.8588	26.9411	19.6382	9.54906	17.2832	18.2684	31.9728	7.59242	122.476	9.03219	8.80941	4.39775	15.3311	15.515	7.06058	3.94835	9.2547	6.61627	14.825	2.08095	8.9732	27.0282	8.70916	37.4259	18.0966	23.5229	1.8034	24.4836	8.06544	16.8533	8.06885	7.45955	23.7316	9.88435	7.57397	15.9513	5.5072
WP_013486154.1	MVNVTINGTPVQAGEDTTILEAAASAGIHIPTLCYLKGLNEIGACRVCLVEIEGIEKLVTACGNKVAEGMVISTNSPRVREARRTNVELILSQHDCYCASCARSGNCNLQSLSNDLGILDLPYRREMPVSEWNKSFPLIRDFSKCIKCMRCVQVCDKIQDMNIWDIANTGSRTTVDVSQNRKMEESDCTLCGQCITHCPVGALRERDDTDKAFAALADPDTITVVQIAPAVRAAWGESLGLPREQATAKRLVAALRKIGFRYIFDTTFSADLTIMEEGSEFLAKLRNRENETFPMFTSCCPGWVRFLKSQYPDMVRQLSTAKSPQQMFGAITKSYYAKLLDVEPERICSISVMPCLAKKQEAALPTMDTAGAGPDVDIVLTTREIDRMIRAEDIHPGEL…	[FeFe] Group A2	[FeFe] Group A2	Evolving	Labile	2	[FeFe]-centre, 3 x [4Fe4S] clusters, 1 x [2Fe2S] cluster	NADH-dependent glutamate synthase	7.07432	9.56093	3.62804	1.80941	17.0638	5.15893	3.68216	4.77453	7.48937	5.48052	7.30807	7.59242	14.8261	6.02146	2.03294	8.7955	11.4983	10.9898	7.06058	1.97418	2.31368	5.06778	9.43407	4.16191	14.5428	6.08133	8.70916	11.5842	4.40189	3.36041	4.20794	14.1747	1.15221	12.64	8.06885	3.72977	0.608504	11.8612	0	9.8162	5.5072
WP_006299828.1	MISLNIDGKYVKVPEGSTILDAAKALGIEIPTLCHLDLHAVGLVNKGASCRICVVEVKGRRNLAPACATPAVEGMEVKTNTIRVLNARKTVLELLLSDHPKDCLTCAKSGNCELQEMAERFCLRENRYEGGLQSTYKKDHSPSLERDMDKCVMCRRCETMCNEVQTVGVLSGVNRGFTSVVAPAFEKPLEESVCTFCGQCAAVCPTGALVERDYSWQVIEALADPEKVVVVQTAPAVRAALGEEFGLEPGTLVTGKMAAALRALGFDHVFDTDFAADLTIMEEASEFLDRLTRHLNGDKDVRLPILTSCCPAWVKFFEHQFPDMLDVPSTAKSPQQMFGAIAKSYFAQKLGIPREKMVVVSIMPCLAKKYECSRPEFAENGNPDVDISISTRELAHLIK…	[FeFe] Group A3	[FeFe] Group A3	Bifurcating	Labile	4	[FeFe]-centre, 3 x [4Fe4S] clusters, 1 x [2Fe2S] cluster	NADH dehydrogenase, thioredoxin, thioredoxin	0.430782	0.569972	0	0	0	0.573215	0	1.59151	0.576106	0.913421	0.913509	0	0	0	0	0	0	0	0	0	1.15684	1.68926	0	0	0	0	0	0.891093	0.489098	0	0.400756	2.57722	0	0	1.34481	0.932444	0	1.97687	1.082	0.613512	0
WP_006778965.1	MENITIKINGTEVSAPKGSTILEAARIAHIEIPTLCFLKEINEIGACRMCVVEVKGARSLVASCVYPINPGMEVFTNTPKVLDSRKKTLQLLLSNHERKCLSCVRSGNCELQTLAKELGVEDEAYYDGAVTQSCPDDSAAHMIRDNSKCILCRRCVAVCEKVQGIGVIGANDRGFDTNIGSAFKMGLGETSCVSCGQCIAVCPTGALREKDYIDDVLAAIADPDKHVIVQTAPAVRAGLGEEFGYPIGTNVEGKMAAALRRIGFDKVFDTNFSADLTIMEEAHEFIERVQHGGVLPMITSCSPGWIKYCEHYFPDMTENLSSCKSPQQMFGAIAKSYYAEKQGLKPKDIVSVSIMPCTAKKFEIGRNDQAANGVPDVDYSLTTRELARMIKKLGIRFNE…	[FeFe] Group A3	[FeFe] Group A3	Bifurcating	Labile	4	[FeFe]-centre, 3 x [4Fe4S] clusters, 1 x [2Fe2S] cluster	NADH dehydrogenase, thioredoxin, thioredoxin	6.53403	7.81183	4.83739	6.33292	7.75626	13.1839	1.22739	1.59151	6.91327	14.6147	6.39456	3.79621	5.8015	3.01073	3.38823	0.62825	15.3311	5.17167	3.53029	7.8967	6.36261	5.77164	5.3909	4.16191	3.40363	4.05422	1.93537	30.2972	1.95639	11.4254	1.8034	7.73166	1.15221	7.89999	4.03442	4.66222	4.25952	2.9653	1.082	7.97566	2.7536
WP_028580885.1	MGKVITIQPVTRIEGHASIAIELDDNGNVSDAKMHLTSLRGFEKFIQGRPAEEVPRIVNRICGICPWMHHLASNKAVDGCFGVVPSPAGHKLRELCQAMAHINDKILHFFFLAAPDFMIGPDSDYSVRNVMGIVKQAPELASQVVRMRQLGQMMIEKFAGKAIHPIAAVTGGFAKPILESERQEMLQACRTLLDFSCFALDFARKNVFRQFQDVIQQVGVIHTGFLGTVDDTGGLNIYDGKLRLMKGSGEYVEFAADRYADYIGEHVEPWSYGKMPYAKVWDEGFSMDLDQPKGIYRSNTLARLNVCDHIGTPKAQAALEEFRSAFGRYPQYTLLYHYARLIELIYVCERSLELLSDASITDTNVRSKVEPKAGRGVGMVEAPRGTLIHDYETDDNGCI…	[NiFe] Group 3c	[NiFe] Group 3c	Bifurcating	Sensitive	4	[NiFe]-centre, 3 x [4Fe4S] clusters	Polyferredoxin, [FeS] protein	0.0623396	0	0	0	0	0	0	0	0	0	0	0	0	0	0	0	0	0	0	0	0	0	0	0	0	1.35141	0	0	0	0	0	0	0	0	0	0	0	0	0	0	1.83573
WP_026881775.1	MKSNLNNIFKGLVDSYYNNTFEQYISQLLSDSSIDKDALSSSISSLCGVQLKYSDSEDYIKSLKGAIKSYNSNHKIVNKVNQCKMECADENGITPCQKSCPFDAIYVDGDTLSTKISEERCIDCGLCIEACPSGSILDKVEFIPLVELLRSNTPIIAAVAPAIIGQFGDNVTMDNLRSAFKKLGFSDMVEVAFFADMLTLKEACEFDAKVNSKEDLMITSCCCPMWVGMLKKSYNEMVKYVSPSVSPMIAAGRVIKTLNNNCKVVFIGPCIAKKAERKDKDLIGAIDFVLTFAEVKDIFQSLNIIPSELPEDPSLDYASREGRLYARTGGVSIAVHEAVAVLFPKKDHLFKSAQANGVRECKDILEKAKNKEIDVNFIEGMGCVGGCVGGPKALIPKEQ…	[FeFe] Group B	[FeFe] Group B	Evolving	Labile	1	[FeFe]-centre, 2 x [4Fe4S] clusters	None	0.0775918	0.00847503	0	0	1.55125	0	0	0	0	0.913421	0	0	0	0	0	0	0	0	0	0	0	0.140772	0	0	0	0	0	0	0	0	0	0	0	0	0	0	0	0	0	0	0
WP_008709061.1	MKYINVAEANCKNCYKCLKVCPVKSIKYSNNHVEVLENECILCGRCIRNCPQHAKSLVNDISAIKQAVGEQGAARTADASAGLPPEVFSNVRQGEQGAARVIAALAPSYIASFGAENRFRLAGALHRLGFDAVEETSVGAHAVTKEYARILESDSMDNMITTCCPSVVFLVQKYFPQLTPQLAQVLSPMEAHGEFLRKKYGDDALIVFFAPCISKIEEARVSEKRFIDGVVTFKQLARWFIKEDIELEKCAEGYFGNDPSSSAIYPVFEGIVKDVRANLPEDSHVFNKYTFLSVQGAKDVIELLEEISEGRIHNCFIEASTCYGSCINGPEKPDTEYHPVSTGIDMIRYLRAEKNIREADISSLDLRRHIEPKPLREDIPDEETIRSILAEIGKTKPEH…	[FeFe] Group C	[FeFe] Group C3	Sensory	Labile	2	[FeFe]-centre, 2 x [4Fe4S] clusters, PAS domain	Phosphatase	2.30455	2.72365	10.8841	1.80941	1.55125	8.02501	0	0	0.576106	5.48052	0	0	1.28922	3.01073	0	0	0	3.2323	1.76515	0	1.15684	1.40772	0	0	2.47537	0.675704	4.83842	11.5842	1.4673	3.36041	1.00189	0.644305	2.30441	0.526666	2.68962	0.932444	0	0.988435	2.16399	2.45405	0.917866
WP_008860581.1	MAEITTVPFGPQHPVLPEPIHLDLELKDEKVVRAVPSIGYVHRGLEKLVEKRDFKQFIYVAERVCGICSFGHGWGYAKAVEGLMNIEIPERASCLRTMWHELSRLHSHLLWFGLAADAMGFESLFMNAWRIREIVLDIFEETTGGRVIFSVCKIGGVRRDINDTQRKEILEKMKELRKEIQQMAMVFLYDNTIQSRLEGVGVLSMNDAMDMGCVGPMARASGLPVDYRMAEDEGFYKKLHFHPVTETAGDCLARVKVRLGELTQSIDLICGCLELLPEGAIEAPVRGLPPAGEYFTRVEQPRGEALYYVKGNGTKNLERFRLRTPTNVNLAALVKMLKGCELADVPNIILTIDPCISCCER	[NiFe] Group 4e	[NiFe] Group 4e	Evolving	Sensitive	6	[NiFe]-centre, 1 x [4Fe4S] clusters	NuoL, NuoH, NuoC, [FeS] protein	2.69714	1.33956	0	0	0	0	0	0	0	0	0	0	0	0	0	0	0	0	0	0	0	0.140772	36.3886	106.129	0	0	0	0.891093	0	0	0	0	0	0	0	0	0	0	0	0	0
WP_010863916.1	MSYEYQTQGFTLSNAGRRLVVDPITRIEGHMRCEVNIDSNNVITNAVSCGTMFRGLEIILQGRDPRDAWAFIERICGVCTGVHALASVYAVEDALKINVPDNANIIRNIMLATLWCHDHLVHFYQLAGMDWIDVISALKADPKKTSELAQSLSSWPMSSPGYFFDVQNRLKRFVESGQLGIFRNGYWGNPEYKMPPEANLMGFAHYLEALDFQKEIVKIHAVFGGKNPHPNWIVGGMPCAINIDDSGAVGAVNMERLNLVQSVITRTSEFINQVLMPDALAIGHFYKDWSKIGTGLSNQSVLSYGAFPDIANDFGDSSLLLPRGAVINGDFNNILPVDLYDPEQVQEFVDHSWYQYPDDHKGRHPFDGLTDPYFNVGAAKGTDTNILQLDEQARYSWIK…	[NiFe] Group 1d	[NiFe] Group 1d	Aerobic Uptake	Tolerant	3	[NiFe]-centre, 1 x [4Fe3S] cluster, 1 x [3Fe4S] cluster, 1 x [4Fe4S] cluster	Cytochrome b	0.0954864	0.20191	0	0	0	0	0	0	0	0	0	0	0	0	0	0	0	0	0	0	0	0	0	0	0	0	0	0	0	0	1.40265	0	0	0	0	0	0	0	0	0	0
WP_016147607.1	MRTFETDVQLLKYRVLKAVAKRAYEGTLMESYYEIPKLISPGPKPTMRCCVYKERAIVQERVRLAMGGDRRNPNIIEVIEIACDECPVERYMVSESCRGCISQRCIKTCPKQAISKKNGKAHIDFDLCIECGRCAKVCPYGAITEHVRPCERSCKVGAIHMNEEKKAEINPEKCISCGACSYACPFGAIMDKSFMVDAINIIRNKKENYKTVAIVAPAIAAQFDGVTLGQVATAIRQLGFDYVVEAAIGADMVADKEAEELVEKGFLTSSCCPAFVDYIKKHVPELADKISHNLSPMAEIGKFVKLGGESPVKCIFIGPCTAKKAEMRLPNVDLWIDSVLTFEELQAMIDAREIEMESLEETSMNDASYFGRIFGRSGGLTEAVLEVIKEKGLDFEVKA…	[FeFe] Group B	[FeFe] Group B	Evolving	Labile	1	[FeFe]-centre, 3 x [4Fe4S] clusters, 1 x [2Fe2S] cluster	None	2.91393	3.35537	0.604674	1.80941	10.8588	4.58572	1.84108	1.59151	4.60884	2.74026	0.913509	5.69432	10.9584	0	2.71059	0	3.83277	1.29292	0	5.92253	1.73526	3.66006	6.73862	0	1.85652	2.70282	0.967684	5.34656	3.42369	1.34416	1.40265	3.22153	0	1.05333	5.37923	0.932444	1.21701	5.93061	0.540998	3.06756	0
WP_007063270.1	MSNDTAIIRIDEELCTGCRRCSEVCPVDAIEGKDGVPQHIDTDKCVMCGQCVQVCKGYYSVYDEPATPLSKKYYDRGMLDNVEEPIFAAYKACQVKKIKDLLENKDLFKVVQCAPAVRVGISEDFGLPLGTLNPKKMAAALRKLGFDRVYDTNFSADLTIMEEGSELIERVTKGGTLPMFTSCCPAWVKYLEQTYPELLDHLSTCKSPQQMAGAIFKTYGAKINNVNPAKMLSVSVMPCTCKDFESGREEMKDSGYRDVDLVITTRELAYLIKDSGIDFKELEEEEFDDPLGMYTGAGTIFGATGGVMEAALRTGYELITKKQIPSVDLSAVRGGEGFRTAEVQVGDLKLKVGIVSGLKNAAPVLESIKKGECDLHFIEFMTCPIGCVSGGGQPKLLLD…	[FeFe] Group A4	[FeFe] Group A4	Bifurcating	Labile	6	[FeFe]-centre, 3 x [4Fe4S] clusters, 1 x [2Fe2S] cluster	NADP dehydrogenase, four FeS proteins	0.256904	0.238431	0	0	0	0	0	0	0	0	0	0	0.644611	0	0	0	0	0	0	0	0	0	0	0	0	0.675704	0	4.45547	0	0	0.400756	0	0	2.10666	0	0	0	0	0	0.613512	0
WP_033162999.1	MVNNVRIWIDGHSYHVPERTTILDAAKMAGIQIPTLCYWKGLNEIGACRVCVVEVEGYERLFTACNNTVDEGMVIWTNSKKVREARIVNVQLILSQHNANCTMCTRSGNCSLQKVANDLGIMDSPYKKDIPAQKGNPNFPLIRDYTKCIKCMRCIQVCDKIQNSHIWDVVNTGSRTTVDVRDVYSLEDSKCALCGQCITHCPVNALHERDDTDSVYEAIDDPKKVVIAQIAPSIRTAWGEEFGLSPDVATVERLAEALHMIGFDFILDTDFSADLTIMEEASEFLDHLQHPTDHKFPMFTSCCPGWVRFVKAHYPEFVDQLSTSKSPQQMFGAIAKSYYAKLLQVEPENIYSVSIMPCLAKKQECDIPVMNDACGDPDVDVVLTTREVNRMIRRAYIIP…	[FeFe] Group A2	[FeFe] Group A2	Evolving	Labile	2	[FeFe]-centre, 3 x [4Fe4S] clusters, 1 x [2Fe2S] cluster	NADH-dependent glutamate synthase	1.95822	4.45518	1.81402	4.52351	4.65376	3.43929	0.613694	3.18302	3.45663	0.913421	6.39456	0	1.93383	0	4.06588	1.88475	0	2.58584	1.76515	3.94835	0	2.53389	1.34772	0	0.928262	0	1.93537	1.78219	0.978197	0	0.801513	7.73166	0	5.26666	2.68962	0.932444	1.21701	7.90748	0	0.613512	0
WP_007524167.1	MSRTIIPFGPQHPVLPEPLHLKLVVEDETIVEAIPALGYVHRGLETLASIRDYNQMVYIVERVCGICSCIHAMCYCQGLETMMNVEVPSRAKYLRVIWSELHRIHSHLLWLGLFADGFGFESLFMQFWKIRERVMDINEATAGNRVVISVNVVGGVRRDLDKTQQRWILDELDKLEKELRQLMKTMLDDYTVKKRTVGVGVLTAEQALQLGAVGPTLRGSGVAQDARQLGYAAFDELDFEPVTSPEGDSWARSKVRFMETLQSMDLVRQAISRLPDTELAAKVPGKPTGEVVCRVEQPRGELLYYLKGNGSKNMERVRIRTPTFANIPPLLAMLPGAQLADVPIAALTIDPCISCTER	[NiFe] Group 4e	[NiFe] Group 4e	Evolving	Sensitive	6	[NiFe]-centre, 1 x [4Fe4S] clusters	NuoL, NuoH, NuoC, [FeS] protein	0.426515	0.3468	0	1.80941	0	0.573215	0	0	0.576106	1.82684	0	0	0.644611	3.01073	0	0.62825	3.83277	0	0	0	0	0.140772	0	0	0	0.675704	0	0	0	0	0.200378	0	0	0	0	0	0	0	0	0	0
WP_010293869.1	MFIFETQLKKVKHNVLKSVAILAKEDRLTTEELSKIHETIVDEDKPQYRCCVYKERVIVGQRAKLAAGYLPKGDDMNHLEDIKNRDQVIYVVEAACDKCPINKYTVTEACRGCVAHKCMEVCPTKAMVRVNGKAFINQELCKECGLCKKQCPYHAISEVLRPCKVVCPTGALSVAEDRRALIKEELCIECGACMKACPFGAISDKSLIEPVARRLANKENLYAVVAPAIAGQFGPNVTLGQIKAALINVGFKDMYEAACGADIVTINESNEFVHRMNNGSKYMTNSCCPAFLTYINKKFPKESINISSTVSPMIATGKYIKSIDPEAKIVFIGPCTAKKAEMRRDDVKDIIDYVLTFEEISALLDAFNMDPENCETLPADDASIYGRGFAAGGGLTSAI…	[FeFe] Group B	[FeFe] Group B	Evolving	Labile	1	[FeFe]-centre, 3 x [4Fe4S] clusters, 1 x [2Fe2S] cluster	None	0.121136	0.085314	0	0	0	0	0	0	0	0	0	0	0	0	0	0	0	0	0	0	0	0.281543	0	0	0	0	0	0.891093	0	0	0.200378	0	1.15221	0	0	0	0	0.988435	0	1.22702	0
WP_016182069.1	MKEVMITINGKVCTAPEGSTILEAARVNNIEIPTLCFLKEINEIGACRMCVVEVKGARSLVTACVYPISEGMDIKTNSKKVFESRKTTLELILSTHERKCLSCIRSGNCELQKLCKEFNVADEDYFNGENCEYEFDDSAVHMVRNNNKCILCRRCVAACSKWQAVGVIGPNNRGFETHIGSAYEQNLSEVPCISCGQCIVVCPTGAIHEKDQTQEVWDALEDPTKHVIVQTAPSIRVTLGEAFNMPIGTNVEGKMIAALRQIGFDRVFDTNVAADFTIMEEANEFLERVGNNGPFPMFTSCSPGWVKYCEHYHPELIPNLSTCKSPQQMFGALAKTWYAEKEGIDPKDIFVVGIMPCTAKKFEVTREDEAAAGYSDCDVALTTRELARMIDKAGVRFVD…	[FeFe] Group A3	[FeFe] Group A3	Bifurcating	Labile	3	[FeFe]-centre, 3 x [4Fe4S] clusters, 1 x [2Fe2S] cluster	NADH dehydrogenase, thioredoxin	0.904947	1.03394	0.604674	0	0	0.573215	0.613694	0	1.15221	0	2.74053	0	0.644611	0	2.03294	2.513	0	0.646459	0	0	0	1.26695	1.34772	0	4.95073	0	1.93537	0	0	2.68833	0.200378	0	0	0.526666	0	0	0	0	0	1.84054	0
WP_012283632.1	MQPKFETTVQLLRHEVLTHVAKLAMEKTLDQHKELIPYMIVQGKKPRFRCCVYKERAVLKERVSLACGNDVRGSSGIIQVMQTACEECPVERFTVTEACRGCIAHPCMEACPVGAISQINRRAIINQEKCIECGRCRQACPYGAITDTQRPCIKACPVKAISYSEDKLATIDQKKCINCGQCAYRCPFGAISDKSFITQVIGTLQAKDRPVYALLAPAVVAQFPEADLGQIRTALKQIGFFDVVEAALGADMIVPEEAKELEEKIHAGSFLTTSCCPAFFDMVDKHFPALKGNVSTTVSPMIAAARYIKAKNAHAVVVFIGPCIAKKAEITRESVAGAVDYTLTFEELFALFHATDIDPAECESHLREETSPFSRAFARSGGVTAAVIQSLKEDNKQLE…	[FeFe] Group B	[FeFe] Group B	Evolving	Labile	1	[FeFe]-centre, 3 x [4Fe4S] clusters, 1 x [2Fe2S] cluster	None	0.109967	0.0410682	0	0	0	0	0	1.59151	0	0	0	0	1.28922	0	0	0	0	0	0	0	0	0	0	0	0	0	0.967684	0	0.978197	0	0	0	0	0	0	0	0	0	0.540998	0	0
WP_012208968.1	MKVKINNREYEFDHEISILDATKKAHIKIPTLCYSEKLEPFGSCRLCSVEIKGERTLKPACVTKITDGMEIFTHSQRVRKTRKTIIELIIASHGINCNLNCLTCSKSGSCEIKEVAEEIGVTEIRVPPISNGLPEDRSSYSVVREPQKCIVCNRCVRKCSEVQSVNILTIANRGPDTYVTTFMDKGMGNVDCTNCGQCILECPTGALHEVYQMDQVWTALSDESKYVIVQTAPAVRVAIAEEFDAEPGKIATKQMVAGLRLLGFDKVFDTNFAADLTIMEEANEFIERFKNNGKLPLFTSCSPGWVKFLEHNYPEFIDNLSSCKSPQQMFGAIAKTYYANKLGISKEDMVVVSVMPCTAKKFERVRPEIKGDVDYVLTTRELAKMFKLAGIDLLNVPPE…	[FeFe] Group A3	[FeFe] Group A3	Bifurcating	Labile	3	[FeFe]-centre, 3 x [4Fe4S] clusters, 1 x [2Fe2S] cluster	NADH dehydrogenase, thioredoxin	0.67525	0.594215	0	0	0	0.573215	0	3.18302	0.576106	1.82684	0	3.79621	2.57845	0	2.03294	0	0	0	3.53029	0	0	0.703859	8.08635	2.08095	0.928262	0.675704	0	0.891093	0	0	0	0	0	0	0	0	0	0.988435	0	1.22702	0.917866
WP_012302431.1	MAVTLTIDGRPVTVEPGTTVLDAARQLGIAIPTLCYLKQLNHRAGACRMCIVEVEGARTYLASCTLPATEGMVVRTGTPGVREARRMILELMLSDHPNECLLCIRSGSCELQAAANLMGLREIRFQRMSRTLYKKDDSSPAIIREPQKCIYCRRCVTVCAEVQTVHAIGPQLRGFATVIAPPYNLPLGDSVCVHCGQCALVCPVGAIYERDDTGAVWAALADPAKHVVVQTAPATRVTLGEAFGLPPGTPVTGKMVAALRRLGFDRVFDTDFTADLTIVEEGNELIHRLTKGGPLPMITSCSPGWIKFIEHFYPEFLPHLSTAKSPQQMFGALAKTYYAEQAGIDPKDMVVVSIMPCTAKKFEAGRPEMNASGYRDVDMVLTTRELVRMLHEACIDLNN…	[FeFe] Group A3	[FeFe] Group A3	Bifurcating	Labile	3	[FeFe]-centre, 3 x [4Fe4S] clusters, 1 x [2Fe2S] cluster	NADH dehydrogenase, thioredoxin	0.292974	0.248773	0	0	0	0.573215	0.613694	0	1.72832	0.913421	0	0	0.644611	0	0.677647	0	3.83277	0	0	0	0.578419	0.422315	1.34772	0	0	0	0	0	0.489098	0	0.200378	0	0	0	0	0	0	0	0	0	0
WP_024788990.1	MKKTAKVKTFSPTEKNYVNIATGTYRAGELKGIIKINSQSCVGCDTCRHVCPADAINGAIGVAHSIDEMKCIACGQCLINCPFGAIEQLSFVEEVMKNLENKEKTVVAVIAPAVRVAIAEEFGAPPGTLTVGKLHNALKKAGFKIYENNLAADQTIMEEGSEFIAKVKYWLLGERSEELNKMANHPLPHFTSCCPGWVRYAEIYYPGLIPHISGTKSPMQIAGPSAKTWAALDIWKVDPRNVYTVGIMPCTAKIFEASRPEFKSSWKFLKEKGYIPEDTPPFPDTDVVLTTRDLATLLKMKGINPLELPEKENETETEIYTGAGTIFGNSGGVMEAALRTVYYILSEKEPPKWDFYAVRGHTDGLREAEIPITLKSGKTIVVKAAVVNGIKNHLDKIVK…	[FeFe] Group A1	[FeFe] Group A1	Evolving	Labile	3	[FeFe]-centre, 2 x [4Fe4S] clusters	Small subunit, cytochrome b	0.302832	0.243568	0	0	0	0	0	0	0	0	0	0	0	0	0	0	3.83277	0	1.76515	0	0	0	0	0	0	0	0.967684	0	0	0	3.20605	0	0	0	0	0	0	0	0	0	0
WP_014758969.1	MDKVRITIDGIPAEVPANYTVLQAAKYAKIEIPTLCYLEEINEIGACRLCVVEIKGVRNLQASCVYPVSDGMEIYTNTPRVREARRSNLELILSAHDRSCLTCVRSGNCELQDLSRKSGIDEIRFMGENIKYQKDESSPSIVRDPNKCVLCRRCVATCNNVQNVFAIGMVNRGFKTIVAPSFGRGLNESPCISCGQCIEACPVGAIYEKDHTKIVYDALLDEKKYVVVQTAPAVRVALGEEFGMPYGSIVTGKMVSALKRLGFDKVFDTDFAADLTIIEEGNELLKRLNEGGKLPMITSCSPGWINYCERYYPEFIDNLSTCKSPHMMMGAIIKSYFAEKEGIDPKDIFVVSIMPCTAKKYEIDRPQMIVDGMKDVDAVLTTRELARMIKQSGIDFVNL…	[FeFe] Group A3	[FeFe] Group A3	Bifurcating	Labile	4	[FeFe]-centre, 3 x [4Fe4S] clusters, 1 x [2Fe2S] cluster	NADH dehydrogenase, thioredoxin, thioredoxin	0.0657295	0.00960024	0	0	0	0	0	0	0.576106	0	0	0	0	0	0	0	0	0	0	0	0	0.140772	0	0	0	0	0	0	0	0	0	0	0	0	0	0.932444	0	0	0	0	0
WP_008410184.1	MTKLTYDQIFKDLVKSAYDGKLDEGIAKLKKQGDGDVEKYIQYAVGGGDPDRVVYKVRDCSCGCEDEGCQVSCLMGAIERDEQGHVVIRGSHCTDCGQCVEVCQHDCLVDRKEFIPLVEILKNRKVPVYAIIAPAFIGQFGEEVSPGQLRAALKRLGFYGMVEVALFADILTFREALEFDAHVQKSGDFVLTSMCCPMWVSMVKKVYTRLSSHITPSVSPMVACGRSVKKLHPDAKVVFIGPCIAKKAEAKEPDVRDAVDVVITFKELQQIFEAVGIDPAAMVADEKEHSSTGGRIYARTGGVSKAVADTLKRIRPDKQIQIKAVQAHGVKECKQLLQDALDGKIIANFYEGMGCVGGCVGGPHVLIDPARGTELVNRYGEQANSLTPADNKYVLALLK…	[FeFe] Group B	[FeFe] Group B	Evolving	Labile	1	[FeFe]-centre, 2 x [4Fe4S] clusters	None	0.0614129	0.0403601	0.604674	0	0	0.573215	0	0	0	0	0	0	0	0	0	0	0	0	0	0	0	0.281543	0	0	1.23768	0	0	0	0	0	0	0	0	0	0	0	0	0	0	0	0
WP_012447299.1	MRKFENKIQESKYEVLREVSKAAFEGTLDKELIHIPKRIDLEPKIRCCIHKERVVTYERIKVALGGNKENNNIIEVIDEACDECFDTRYVITEACRGCLANHCVSYCPVGAIEFVQHKAKIDGQKCIECGKCKDACPYNAIVDVMRPCKKACGVNAINIEVNKKATIDNDKCIQCGACVYQCPFGAIMDKSYITEVIELLKNADENNKVYAIIAPAIASQFTYASIGQVITGIKKLGFHDVIEVALGADMVAVKETHEYAQTIENKKTITSSCCPSFVQYILNEYPELKDNISSMISPMIAISKLIKDLDPKSKVVFIGPCTAKKMEIQQKDLQGITDYALTFEELAAMIDSKGLELQDQEESLLDNASYYGRIFARTGGISQAIENIIKEEKLDVPFD…	[FeFe] Group B	[FeFe] Group B	Evolving	Labile	1	[FeFe]-centre, 3 x [4Fe4S] clusters, 1 x [2Fe2S] cluster	None	0.234317	0.182528	0.604674	0	0	1.14643	0	0	0	0	0	0	3.22306	0	0.677647	0	0	0.646459	0	0	0	0	0	2.08095	0	0	0	0	0	0	0	0.644305	0	0.526666	0	0	0.608504	0	0	1.22702	0
WP_024851245.1	MIKVTVNGRSVNLDDGATLLDAAREADVHIPTLCYYPRLPSHAVCRLCLVNVSSENKPQPACKTKAKNGDIVETDTKELIEYRKADAQWLLARHPNDCIRCEVNGSCQFQNLISEYQLEDRWEKLPRGSEEHPEHQLTDHTSPSIWRDISKCIECGLCADACGEPGQQQNIIGFAEHGSGRIPVTVFDQPLSETKCISCGQCTLVCPVGALIETPHWHDVLHTLDAHRRVSAVQVAPATRVAISEEFGMKPGTVSTGRMINALRQIGFDYVFDTNFAADLTIMEEGTEFLTRIKHQKNLPLFTSCCPGWVNWVELNRPDLLPHLSTTKSPQQMHGALTKRGAFARSLGAEFESGETEPYVVSIMPCTAKKDEAARPGVSDDVDRVLTTRELARMIKARG…	[FeFe] Group A1	[FeFe] Group A1	Evolving	Labile	1	[FeFe]-centre, 3 x [4Fe4S] clusters, 1 x [2Fe2S] cluster	None	0.15881	0.132737	0	0	0	0	0.613694	0	0	0	0	0	0	0	1.35529	0	0	0	0	0	0	0.140772	0	0	0.309421	0	0	1.78219	0	0.672082	0.200378	0	0	0.526666	0	0.932444	0	0.988435	0	0	0
WP_013931422.1	MTVKVFINGKQYEVPANSTVLEACNLAGVYVPTLCNHPRLEPTGACRVCVVEVEGSRNLQPACATKVADGMRIITRSERVERAVKFNLSLLLSRHPKDCMTCEVNGRCEFQDLIYRYNIKDIFGGEQPLSKVYDDSSPAIIRDLEKCIVCGRCVRACSELQGMDIYSMVDRGFESLPQTAFEMPVYDTDCIACGQCSVFCPVGAITENSQVRKVLEELEKHDKVLIVQTAPATRVALGEEFGLEPGSISTGKMVAALRRLGFDYVFDTNFAADLTIMEEGSEFLERLKNGGPFPMFTSCCPAWINMMEKLYPQFIPNVSSAKSPHQMLGAVVKTYFAKKINVDPKNIFLVSIMPCTAKKDDIIRPQHMINGVPAVDVVLTTRELAKLIKIKKIPFATLP…	[FeFe] Group A1	[FeFe] Group A1	Evolving	Labile	1	[FeFe]-centre, 3 x [4Fe4S] clusters, 1 x [2Fe2S] cluster	None	0.754487	0.71518	0	0	0	1.71964	0	0	0	1.82684	1.82702	0	0	0	0.677647	0	3.83277	3.87876	1.76515	0	0	1.9708	1.34772	0	0.309421	0.675704	0.967684	0	0	0	0.400756	0	0	0	1.34481	0	1.21701	2.9653	0	0.613512	0
WP_002945014.1	MLSVYKIKTFPPAPNSRGGEADFEGTYRKGELRGIIRIDQDSCVGCDTCRSFCPTDAIDGSLGVAHKIDQNLCVACGQCLINCPFAVIEQMSFVDEVMQKLDDEKTFVVAHPSPAVRVSLAEEFGGKPGELTVNKMYNAFEKAGFNMYDVNFAADQTILEEGTELIKKIKYWLLGERSHDLEHVSHHPFPHFTSCCPAWVRNAEIFHPELIPHISGAKSPIQMGGPLAKTWAAKFVWDKDPRDIYVATVTPCTAKIYEASRPEFNSAYEYLKERGEIPADTKSFPDIDATLTARDIAEILRKKGINPLEMSDEYPEKTMNVYTGGGTIFGNSGGVMEAALRTAYFLLSGQELKDPDLTPVRGYDKDLTEAVIPIPLKDYDGKTLELKVAVVNGASRNLN…	[FeFe] Group A1	[FeFe] Group A1	Evolving	Labile	1	[FeFe]-centre, 2 x [4Fe4S] clusters	None	0.321835	0.335877	0	0.904703	1.55125	0	0	0	0	0	0	0	0	3.01073	0	0	0	0.646459	0	0	0	0.281543	0	0	0	0	0	0	0	0	4.00756	0	0	0	0	0	0	0	0	0	0
WP_012635168.1	MAGEVSEVTRIRRKVLTEIARLTFEDRLVEEVDYIPRRLTENGISNYRCCVYKERAILKERVKLALGVAPDEVDDEEKSLSEIASNVLQGQLGNSDRNIAIIEEACDQCSIDKIVVTNACRNCVAHHCVNSCPRGAITIVNNQAYVIREKCVECGLCVKACPYGAILEVERPCTSACSLDAVVPGEKSTAEIDDNNCIECGSCIEACPFGAISYKSEIVRVVQMLKSGDINTVALVAPSYIGQFGPRVDWEKLCTGLKRLGFHDVIPVALGADKVIEEESREFQAMTDKPMFNSCCPSFVNLIELKFPEYLSQVSTTESPMLKAAYLAKEDGELVQCVFIGPCLAKKSEARNKGQGLIDAVLTFEEIAAMLVAKGINLAKITETGDLSEEHRSPSIPAQ…	[FeFe] Group B	[FeFe] Group B	Evolving	Labile	1	[FeFe]-centre, 2 x [4Fe4S] clusters	None	0.146962	0.0855181	0	0	0	0	0	0	0	0	0.913509	0	1.93383	0	0	0	0	0	0	1.97418	0	0.563087	0	0	0	0	0	0	0	0	0	0.644305	0	0	0	0	0	0	0	0.613512	0
WP_017890120.1	MRDAEKKVVIVDGQEIPLEGEKNILEVAKKADIDIPTFCYHSDLSVYGACRMCLVEVEGRGLMPSCSTPPEPGMVIHTNTARVLAARKMIVELYLANHDRDCTVCERNLNCRLQEMASRMGITRVRFGERTEKDPKDDSTFALVRDPNRCILCGDCVRACREIEGIGIYDFTHRGARARVEPAFGKKLSEVECVYCGQCAIRCPTAALVVKSEVDAAWKAVLDPEKFVVAQIAPAVRVAIGEAFGLPPGEITTGKIVAALKKIGFDRVYDTSFSADLVVIEEAEEFFRRLQSNSRLPQFTSCCPSWVVFAERNYPFYLEHLSSVRSPQQVFGSVIRNFVSQMEDVPNERLVSVSIMPCVAKKFEARRAEYVHDGTPDVDIVLSAQETIKMIKMANIDFR…	[FeFe] Group A1	[FeFe] Group A1	Evolving	Labile	1	[FeFe]-centre, 3 x [4Fe4S] clusters, 2 x [2Fe2S] cluster	None	0.414786	0.441359	0	0	1.55125	0	0	0	1.72832	1.82684	0	0	0	0	0.677647	0	0	0	0	0	0	0.84463	0	0	1.23768	2.02711	0.967684	0	0	0	0.801513	0	0	0	0	0.932444	0	0	0	1.22702	0
WP_018126002.1	MSGCTPKGAPGMAHGEKVIVDPVTRIEGHLRVEAVVDNGKIVDVRSSSQLFRGLEIILKGRDPRDAQHFTQRSCGVCTYVHALGSIRCVDNAVGVDKVLPHNATIIRNLVLASQFMHDHIVHFYHLHALDFVNVANVLNADVNTAAEMANANYKMVNKDSSRVTTPADLQKVKDTIKGIIDSGRLGIFNNAYFLKPGGHPAYKLTPEVDLIGTAHYLEALHLQVKAARMMAVYGAKNPHTQFTVMGGVTCYEGLQEDTIQTFLDIYEEVKNFVVECYIPDLITVASFYKDWASIGGTRNFMSFGEFPAQGGEADLDSRYVKPGVIYDRNLGNVMDFDPSKIEEHVKHSWYKEDTPKHPYEGVTDPMYTSLDDPQRYSWMKAPRYEDKSVEVGPLATALV…	[NiFe] Group 1b	[NiFe] Group 1b	Anaerobic Uptake	Sensitive	3	[NiFe]-centre, 2 x [4Fe4S] clusters, 1 x [3Fe4S] cluster	Cytochrome	0.0371769	0.0023677	0	0	0	0	0	0	0	0	0	0	0	0	0	0	0	0	0	0	0	0	0	0	0	0	0	0	0	0	0.200378	0	0	0	0	0	0	0	0	0	0
WP_012414703.1	MVKAIINGTEIQVKEGTTILEAARLVNINIPTLCKHPDLVADAGCGICVVRVQGTGKMLRACCTALEEGMKITTHDPEIVKVRKNVLELILSNHPKDCLICARNNDCELQRLSSEFGIRDAYYPLIVGRKKHKHDESTKTIDIEGSKCILCGRCVQVCQKNQNVWALSFLGRGINTVLSPAGEIELNDSPCVKCGQCSNHCPVGAIVEHDETQKVWDALSNPDLFPVVQIAPAVRVSIGEAFGYPIGTNLTGKLISSLKKLGFKGVFDTNMGADMTIMEEGNEFVHRFKKKDNMPLITSCCPAWVDFLEKFHSDMLDNFSTCKSPHEIIGVLSKTYYAKKHNVDPSKIFMVSIMPCTAKKYEIHRSEEMFASGHQDIDISLTTRELARMIKQSGIDFKN…	[FeFe] Group A3	[FeFe] Group A3	Bifurcating	Labile	1	[FeFe]-centre, 3 x [4Fe4S] clusters, 1 x [2Fe2S] cluster	NADH dehydrogenase, thioredoxin	0.0932706	0.0353258	0	0	0	0	0	0	0	0	0	0	0.644611	0	0	0	0	0	0	0	0	0.140772	0	0	0	0.675704	0	0	0	0	0	0	0	0	0	0	0	0.988435	0.540998	0.613512	0
WP_016358530.1	MIVPIGPVHPGLKEPLRLKLETQGERVVKAEIDYGYVHRGIEKIMEGKTWQKCIYLAERICGICSYEHTQSFAEVLEHMAGVYAPPRAQFLRVITNELDRIQSHYLANSTFFKCLDHELLFMKVLELREYAMDSIELLTGNRVNMGWNVLGGVRMDANEEHFNAILENLKVIEENHDRIVELFSEGSVLALRTKGVGEMTREEALKGRAVGPIGRASGLKHDCREFHPTYRDHLDFSPIWRKEGDNYARAMNRFDEIPQSIDLIKQAIDNMPKGDIRVPVEVNTGYSEWVNEAPRGEVKYMCETNGNLIKHISIRTPSITNIDSCAKYMLTNVPTVADAVATYASCDPCIACAERVQVLNRDTNEKIVKDMF	[NiFe] Group 4d	[NiFe] Group 4h	Evolving	Sensitive	20	[NiFe]-centre, 1 x [4Fe4S] clusters	NuoH, NuoL, Two polyferredoxins, eleven TM proteins, three hypotheticals	0.0694775	0.0176694	0	0	0	0	0	0	0	0	0	0	0	0	1.35529	0	0	0	0	0	0	0	0	0	0	0	0	0	0.489098	0	0	0	0	0	0	0	0	1.97687	0	0	0
WP_013174729.1	MVSVVINGSKVDVPEDFTVMQAAAQAGFMIPSLCSHPDLKVKENCNVCVVEVNGELKNACAEKVSPGMEVKTFTPRVIEAKRENLKKILKVHPQDCLQCARNQNCELQALTATLTVRSFEHKPLQLTKDTSTPSIVRDPSKCTLCGRCVEVCNDIQTVGALEIKDGVVQTVDGKPLIETKCVMCGQCALACPVGAITEKEEIDRFLEAIADPEKIVVTQIAPAVRVAVAEEVGMETGSLDMLTFVAGLRQLGFDYVFHTNFTADLTIMEEGNELLKRLKEGGTLPMLTSCSPGWINFIETFYPEQLPHLSTCKSPQQMFGALVKTYWADKMGIDPAKIFSVSIMPCTAKKYEATRPEMRDSGYQDVDLVLTTREVGRLFRMCGVGFDKLQPSNFDSLMG…	[FeFe] Group A3	[FeFe] Group A3	Bifurcating	Labile	3	[FeFe]-centre, 3 x [4Fe4S] clusters, 1 x [2Fe2S] cluster	NADH dehydrogenase, thioredoxin	0.262507	0.223322	0	1.80941	0	0	0	0	0	0	0	0	0	0	1.35529	0	0	0	0	0	0	0.140772	0	0	0.618842	0	0	1.78219	0	0	0	0.644305	0	0	0	1.86489	0	0.988435	0	1.22702	0
WP_006584326.1	MISLNIDGKYVKVPEGSTILDAAKQLGIDIPTLCHLKLDDAVGMVNKSASCRICVVEVKGRRNLAPACATPVVEGMEVRTNTIRVMNARKTVLELLLSDHPKECLTCAKSGNCELQELAERFCIREVRFQGEESTYKKDHSPALERDMDKCVMCRRCETMCNDVQTVGVLSGINRGFSSVVAPAFERPLVDTVCTFCGQCAAVCPTGALVERDYSWQVIEALADPDKVVVVQTAPAVRAALGEEFGLEPGTLVTGKMVAALRQMGFDYVFDTDFAADLTIMEEASEFLDRLNRFLAGDKDVRMPILTSCCPAWVKFFEHQFPELLDVPSSAKSPQQMFGAVAKNFFAKKLGIPREKLVVVSVMPCLAKKYEASRPEFSENGNPDVDISISTRELAHLIK…	[FeFe] Group A3	[FeFe] Group A3	Bifurcating	Labile	4	[FeFe]-centre, 3 x [4Fe4S] clusters, 1 x [2Fe2S] cluster	NADH dehydrogenase, thioredoxin, thioredoxin	0.505885	0.849233	0	0	0	1.14643	0.613694	4.77453	1.72832	0.913421	0	0	0	0	0	0	0	1.29292	1.76515	0	0.578419	0.422315	0	0	0	0	0	1.78219	0	2.68833	0	0.644305	2.30441	0.526666	0	0.932444	0.608504	1.97687	0	1.22702	0
WP_018962513.1	MPDSNISFIPFGPQHPVLPEPIHLRLVVENEKVVEALPTVGYVHRGLEKMVEAKDVNQMIYVVERICGICSCMHAMAYCQGIEELMNVEIPERAKYLRVIWAELHRMHSHLLWLGLLADSFGYESLFMQTWRIRERVMDILDKTAGNRVIISVNVIGGVRRDIDTEMQKWVLQSLDAIEKDLREIYNVMKDDYTVKQRTVGVGVLSADDARELGLVGPMLRASGVASDHRMTGYAAYKDLDFEPVVETAGDSYARMIVRMKELFQSIDLIRKAFARMPEGDIAVKVRGNPTGEVISRVEQSRGEVLYYIKADGTKNLSRLRVRTPTFANIAALFKILPGCSLSDVPVLVLTIDPCISCTER	[NiFe] Group 4e	[NiFe] Group 4e	Evolving	Sensitive	6	[NiFe]-centre, 1 x [4Fe4S] clusters	NuoL, NuoH, NuoC, [FeS] protein	0.0980871	0.0464652	0	0	1.55125	0	0	0	0	0	0	0	1.28922	0	0	0	0	0	0	0	0	0	0	0	0	0	0	0	0	0	0	0	0	0	0	0	0	0	0	0.613512	0
WP_005886368.1	MSDKGFILQSSYGSVFSVVEDLEEKVVEQNNEKLVTIAGRVNNPGTIEIPENSTLRDVIGLVGGIKNKKNFKAAQFGLPFGGFLTAGSLDKVIDFSLFPEGVEKNIIILSEEDCIITFAKFYVEFLIAKVKNSEYEQYFQVENEIERIWRILDRISKGKATMRDVYLLRYLSDIIKTKLNQRHNLILESIEQFYDEIEEHIEEHRCPAGECIHLLKFRITEKCIGCTACARVCPVKCIDGKLKEKHTIDTDRCTHCGQCVAACPVGAIFEGDHTLNLLRDLATPRKKVVVQVAPAVRVAIGEAFGFEPGTNVEKKLVGALKKLGVDYVFDTTWAADMTIMEEAAEFQERLERYYKGDDTVKLPILTSCCPAWVKFIEQNYPDMMDVPSTAKSPMEIFST…	[FeFe] Group A1	[FeFe] Group A1	Evolving	Labile	1	[FeFe]-centre, 2 x [4Fe4S] clusters	None	0.101829	0.115371	0	0	0	0	0	1.59151	0	0	0	0	0	0	0.677647	1.2565	0	0	0	0	0	0	0	0	0	0.675704	0	0	0	0	0	0.644305	0	0	0	0	0	0	0	0	0
WP_027202830.1	MLYDNFAMLTKRELLIRIVKLLKEENLVDGVKYIPVEMRPKNKRPIKCCVHKDRYILKHKIISILGFEITDEEIDLIPLSEFAQKALDNKNTKENILSVVHEACSACMQSQYFVTNMCRGCEGRPCLMNCPKAAISFKGGKACITQEDCVGCGLCSKVCPYHAIVYTPVPCEDVCPVKAITKGEDGTEHIDKDKCIYCGKCMQTCPYGAIMERSKVIDVYKSITAPDKKIIAIPAPAIYGQFNATPGQILSAIKAIGFDDVVEVALGAEDTSRNEAAEFLERMEEGKPFMTTSCCPAYVGWVDKHAPMVKPFVSDTRSPMVYAARRVKEQYPDAEVVFIGPCLAKRYEAEMYVPEVDYVMSFEELGAFMVAYDINPETCEELPLDPEVTKFARGYAQAG…	[FeFe] Group B	[FeFe] Group B	Evolving	Labile	1	[FeFe]-centre, 3 x [4Fe4S] clusters, 1 x [2Fe2S] cluster	None	1.29741	1.4646	0	0	0	0.573215	1.22739	0	2.88053	2.74026	0	7.59242	0	0	2.71059	0	0	0.646459	0	0	0	3.37852	0	0	1.5471	2.02711	0	0.891093	0.489098	0	0	0	0	0	5.37923	0	0	0	0	0	0
WP_005952705.1	MFWNFFSFDVTLKFGAGAFVCGEETALIQSMQGERGEPKSKPPYPAQSGYLGKPTVVNNVETLLNVPLIIRYGSDWFREIGTESSPGTKVFALAGKVNNVGLVEVPMGTTLREIIFDIGGGIKNGKRFKAVQTGGPSGGCLTNKDLDISIDFDSLSAKGSIMGSGGMIIMDEDDCMVSIAKFFLEFTLDESCGKCTPCRIGNTRLYEILSRITEGEGRMEDLKLLEELSDTIKEASLCGLGQTSPNPVLSTLKEFREEYIQHIEDKTCLAGVCQKLTHYRITDKCVGCTLCARNCPVHAIVGTVKNNILFHKRFALNAEFVTTDVSLEQLQGHKGGRKDMVRLEIDGKRVEIREGKTILEAAKEIGIEIPHLCYMHLEEVGFKNDCSSCRICVVEVEGQ…	[FeFe] Group A3	[FeFe] Group A3	Bifurcating	Labile	3	[FeFe]-centre, 3 x [4Fe4S] clusters, 1 x [2Fe2S] cluster	NADH dehydrogenase, thioredoxin	124.304	173.205	94.3291	168.275	152.023	137.572	123.352	116.18	137.689	186.338	90.4374	193.607	124.41	105.376	117.233	24.5018	137.98	112.484	58.2498	69.0961	82.7139	166.533	128.034	76.9953	166.468	142.574	88.0592	163.07	101.243	121.647	151.085	131.438	49.5448	104.806	72.6196	72.7306	108.922	135.416	70.8708	146.629	78.0186
WP_013970147.1	MVNLTINGMPVQVEEGTSILDAAKKTNIKIPTLCYNPDLPPWAACGICIVRMEGSPKMVRACTTPVAEGMKVITHDPEIIQVRRTVVELILSNHPNDCLQCPRNGNCELQTLAAEFGIREVPFQNIVKDLKKDESNPSIILDPKKCVRCGRCVKVCQDMQNVWAIEFLGRGISGRIASAADVPLGESPCIKCGQCSAHCPVGAIYERDDTRKVWAALQNKDIHPVVQIAPAVRVALGEEFGLEPGTIITKKIYAALRRLGFKTVFDTNFAADLTIMEEGTELVKRLTEGKGDIPLITSCCPAWVDYLEKYYPEMIPHFSTAKSPQQMMGAMIKAYWAQKAGVDPAKVFSVSIMPCTAKKWEIDRNDDMKSSGYQDVDVSITTRELARMIKQAGIDILNL…	[FeFe] Group A3	[FeFe] Group A3	Bifurcating	Labile	4	[FeFe]-centre, 3 x [4Fe4S] clusters, 1 x [2Fe2S] cluster	NADH dehydrogenase, thioredoxin, thioredoxin	0.302317	0.323604	0	0.904703	0	1.14643	0.613694	0	0	0.913421	0.913509	0	0	0	0	0	0	0.646459	0	0	0	0	0	0	0.618842	0.675704	0	0.891093	0	0.672082	0.200378	0	0	0	0	0	0.608504	0	0	1.22702	0
WP_020490880.1	MVNFKINNKSVSVPEGATILEAAKQNNIHIPNLCYLEGVHKFGSCRLCVVEVEGAKSLQPSCMVTVREGMVVKTNTEKVRKARKVLYELILSDHPKDCLNCERNQSCELQEMGNMLGVGEARFEGKRSAGCIDKSPSITRDMSKCILCRRCITVCNEIQQVGILNAQNRGFKTVVGPAMDLPINSVNCAYCGQCTVVCPVGALKETDAIQDVWQAINDSNKRVVVQVAPAIRAAIGEEFGLEPGTRVTGKLASALRELGFDDVFDTNFTADLTIMEEGTEFLTRVKNALTGGQATLPMITSCSPGWIKYVEHAYPEELDHLSTCKSPHTMLGALVKSYYADKIKVDPKDMYVVSIMPCTAKKFEISRPEMQNNGVPNVDAVLTTRELAKMIKEAGIDFV…	[FeFe] Group A3	[FeFe] Group A3	Bifurcating	Labile	3	[FeFe]-centre, 3 x [4Fe4S] clusters, 1 x [2Fe2S] cluster	NADH dehydrogenase, thioredoxin	0.218731	0.172182	0	0	3.10251	1.71964	0	0	0.576106	0	0	0	0	0	0	0	0	0	0	0	0	0.281543	1.34772	0	0.309421	0	0	0	1.95639	0	0	0	0	0	0	0	0	0	0	0.613512	0
WP_013823947.1	MVTLTIDGLKVQAEEGSTILEAARRANIRIPTLCYLPEVQAIGACRVCLVEIEGNRNLQPACVFPVSEGLVVHTNNVRVRRARKFSVEMILSDHPMDDCLTCTRNQRCELQKLADELGIREVKFTGEKSEGRLDNLSPSIVRDQSKCILCRRCVTVCKEIQEVAAISIQGRGFKTRVEPAFGESLNDVACALCGQCILVCPVGAIHEKEHIEEVWHAIFDPSKFVVVQDAPAVRAALGEEFGYPPGTLVTGKMLAAVRRLGFDRVFDTNFAADLTIIEEGHELLKRIKEGGVLPMITSCSPGWVKFIEHFYPELLPHLSTCKSPHQMLGALVKTYYAQKVGVDPKDMVVVSVMPCTAKKFECNRPEMNGSGYKDVDYVITTRELAKMIKQAGIDFASLE…	[FeFe] Group A1	[FeFe] Group A1	Evolving	Labile	2	[FeFe]-centre, 3 x [4Fe4S] clusters, 1 x [2Fe2S] cluster	Thioredoxin	0.433811	0.473313	0	0	0	1.14643	0	0	0	0.913421	0	1.89811	0	0	0.677647	0	0	0	0	0	0.578419	0.281543	0	0	0.618842	0	0	0	0	0	0.400756	0.644305	0	0	0	0	0	0	0.540998	1.84054	0.917866
WP_005958327.1	MTAKKNILLQSALGSVFSISEQLSLETQTVETGKKVIIAGRVEKPGVVEIEDGMTLQDVITAVGGIKNKKQFKAAQFGIPFGGFLTSKHLEHPIDFSLFPENERNIIILSEEDCIISFSKFYIEFLQDMISEKEEKYAAYHQVTHEVERIGRILDRISKGKSNMRDVYLLRYLSDIIKTKLQQKHNMVLEIIDTFYDEIEEHVEDLKCPAGQCIHLLKFKITEKCIGCTACARVCPVKCIAGAPKKRHFLDTSRCTHCGQCVSACPVGAIFEGDHTLKLLKDLATPKRLVVAQIAPAVRVAIGEAFGFEAGENVEKKLVSALKTIGFDYVFDTAWAADITIMEEASEFQERLERFYAEDPTVRLPILTSCCPAWVKFIEQNYPDMLDVPSTVKSPMQIF…	[FeFe] Group A1	[FeFe] Group A1	Evolving	Labile	1	[FeFe]-centre, 2 x [4Fe4S] clusters	None	0.401586	0.370097	0	1.80941	0	0	0	1.59151	2.30442	0	0.913509	1.89811	0	0	0	0.62825	0	0	0	0	0	0.140772	2.69545	0	0.928262	2.70282	0	0	0	0	0.601135	0.644305	0	0	0	0	0	0.988435	0	0	0.917866
WP_022746500.1	MVNKNTSFIQSSLGSVFSTFSEEELKQITNNQKRSIAICGKINKPGIIDVPEGATLKQIIDICGGLINNSGFKAAQVGIPFGGFLTEESLNKELDFELFDKNVSRNIIILSQEDCIIQYEKFYIEYLLGKIKDGSYKKYIIVEEELVEMLKILDRISKGVSNMREIYSLRNLTQTKKLKLKQSHNIMEEIIEKFYDEIKEHIEEKKCYTSQCNHLIKLTITKKCIGCSNCKRACPVDCINGEVKKRHNINYKRCTHCGACISACPVDAITAGDNTLLFLRDLATPNKIVITQMAPAIRVAIGEAFGFDPGDNVEKKLAAGLRKLGVDYVFDTTWGADLTIMEEAAEFQERLEKYLKGDKNVRLPILTSCCPSWIKFIEQNYPDMLDVPSSAKSPMQMLA…	[FeFe] Group A1	[FeFe] Group A1	Evolving	Labile	1	[FeFe]-centre, 2 x [4Fe4S] clusters	None	0.49793	2.46315	0.604674	0	0	0.573215	0	4.77453	0	0.913421	0	0	0	3.01073	0	0	0	0	1.76515	0	0.578419	0.281543	0	0	0	0	0.967684	0	0.489098	0	0	0	2.30441	0.526666	0	1.86489	2.43401	2.9653	0	0	0
WP_010940798.1	MAMIVVDPITRIEGHLRIQAEVNGGRITDAWSSCTMFRGIEKILKGRDPRDAWYFTQRFCGVCTTVHSIASIRAVENALNVKIPLNAELIRNLIIGSQVVQDHVIHFYHLHALDWVDVVSALKADPSKTATLAASISDWPLNSPTYFKSIQDRLAAFVNKGRLGPFGNAYWGHPAYKLPPEANLMATAHYLEALDWQREIIKIHAILGSKNPHPQTFLVGGMAVPIDPNSQNALNADKIAEIGQLLKKTRAFVEKVYIPDLLAVASFYTEWAGIGGGVGNYLSYGEYPLDNSGKPEKLWLPQGIILNRDLSRVYPIDQRKITESVAHSWYEGEAAGVHPYDETTEARYTGPTPPYEMLDTDGKYSWVKSPRYDGKPMETGPLATILVAYAAGHPGARGA…	[NiFe] Group 1f	[NiFe] Group 1f	Anaerobic Uptake	Unknown	3	[NiFe]-centre, 2 x [4Fe4S] clusters, 1 x [3Fe4S] cluster	Cytochrome b	0.0747281	0.0467709	0	0	0	0	0	0	0	0	0	0	0	0	0	0	0	0	1.76515	0	0	0	0	0	0	0	0	0	0	0	0.601135	0	0	0	0	0	0	0	0	0	0
WP_004093662.1	MQTFKDLHRKIAEATAGGEPVKSLFDDFDKSELNCLFNPEIHPVFWSLEACLVKAAEAGKKISRDVQSCMESLHGKKKLAYALIAPAFIGQFSEEVTPGMLRNVFKQMGFDGMVEVAVFADILTLKEALEFDKNINTERDYQLTSCCCPMWIAMIRKIYSDLMPHVPATVSPMIAAGRTVKILQPGAVTVFVGPCVAKKAEAKEPDLQGAIDHVLTFQETKELFDLLNVDLTLFAANEKENSSRAGRIYARVGGVSEAVKNTVERLNPNRRIAIKTRQADGVVNCKAMINELMSGQVNANFFEGMGCIGGCVGGPKSIIDKEAAREQVNAYGEKALYPTPIDNPYVIELLHRLGFDTTESLIEDNQFFTRKF	[FeFe] Group B	[FeFe] Group B	Evolving	Labile	1	[FeFe]-centre, 2 x [4Fe4S] clusters	None	0.60807	0.654456	0	0.904703	0	3.43929	0	0	0	0	0	0	0	0	1.35529	0	0	0	1.76515	0	0	0.563087	0	0	0	1.35141	0.967684	1.78219	1.4673	0	0	0.644305	0	0	0	0	0	0.988435	0	1.22702	0
WP_021167302.1	MKHIVVDPINRIEGHLRVEIKVDEATGKVEDALSSGTAWRGIELVLKGRDPRDAWLFAQRICGVCTTVHALGCLRAVEDALGIEIPKNANYIRNIIAASQMVHDHIVHFYHLHALDWVSPVAALKADPAAAAVLQNTVLEKYSLKFEGPVSFATNAYPKDFPKATTAYFREIQNKIKAIVESGQLGIFAGHYWDHPDYNVLPPEAHLMAVSHYLNMLDRQRELVYSHLVFGGKNPHPHYIVGGMPCSISLNDMNAPVNTERLALVDTSVNLGIDLVNNFYIPDLLVIGDLFVKAGYVDGGGLAGQRVLSFGDYPEEGYNGVANGEYFKNLLVNSSGVVENFNQGVAKASFYPLEGKDLTDPNVLAEGVEHSWYNYPEAGKDLHPWSGVTNPQFTGPKEG…	[NiFe] Group 1d	[NiFe] Group 1d	Aerobic Uptake	Tolerant	3	[NiFe]-centre, 1 x [4Fe3S] cluster, 1 x [3Fe4S] cluster, 1 x [4Fe4S] cluster	Cytochrome b	0.0456909	0	0	0	0	0	0	0	0	0	0	0	0	0	0	2.513	0	0	0	0	0	0	0	0	0	0	0	0	0	0	0	0	0	0	0	0	0	0	0	0	0
WP_003138680.1	MAKIVNMNLMIAQFICIEITINVFYVDVVSLFVKKLQAVGVIGANDRGFNTHIGSAYEQDLGDVDCISCGQCIVVCQTGAIAEKDQTQEVWAALQDPSKHVVVQTAPSVRVTLGEAFQLPVGTNVEGKMVAALCRIGFDRVFDTNVAADFTIMEEATEFLQRVENNGPFPMFTSCSPGWVKYCEAYHPELIPNLSSCKSPQQMFGALIKTWYAQKNNIEPKDIFVVGIMPCTAKKFEVTRENQAAAGFTDVDIALTTRELARMIDKVGIRFNELPDETFDQPLGDATGAGYIFGATGGVMEAALRTASETLAGHALEAVDFEEVRGTKGIKEATYEMSGQTVKVAVASGINNAKRLIEQIEKGEAFYHFVEIMACPGGCVNGGGQPVQPGSVRNFVDLQ…	[FeFe] Group A3	[FeFe] Group A3	Bifurcating	Labile	3	[FeFe]-centre, 2 x [4Fe4S] clusters	NADH dehydrogenase, thioredoxin	0.0959958	0.0660723	0.604674	0	0	0	0	0	0	0	0	0	0	0	0	0	0	0	0	0	0	0	0	0	0	0	0	0	0	0	0	0	0	3.68666	0	0	0	0.988435	0	0	0
WP_013778946.1	MIFLQQHYHSVTLDVDKCKGCTNCIKGCPTEAIRVRNGKAHILDNKCIDCGECIRICPNSAKYAATDSISRLKEFKFKVALPAPSLFGQFKEGTSTKNIIYALKKIGFDEVYEVPLAAEEVTIAIREYISTHKDVRPLISSSCPAVMRLIQVRFPELIKNIIPIKSPMEIAARRAKEILNKEFGYKAEEIGVFFISPCPAKATSVRQPIGSDKSYVDGVISISGIFGDIVKNLDGEEFESIFNSSSGLGIGWGRAGGENLAIGGDNYLAVDGIHNCIEVLEEVEMNKLFDIDYIECQACIGGCIGGALTVESQYIARVKIRRLSEKLGSNSPINKNEVVEQFKNGYFNLEGKILPKSSLKLDDDLVEAIRKMELLEKTVKDLPGLDCGSCGSPNCRALA…	[FeFe] Group C	[FeFe] Group C1	Sensory	Labile	2	[FeFe]-centre, 2 x [4Fe4S] clusters, PAS domain	Histidine kinase	0.548277	0.588953	3.62804	0.904703	1.55125	2.86607	0	0	0.576106	0	0.913509	0	1.28922	0	1.35529	0	0	0	0	1.97418	0	0.563087	0	0	0.618842	0	0	3.56437	0	0	0	0	0	0	0	0	0	0	0	1.22702	0
WP_028308064.1	MSGNQEKQEARKQVKVQINDQHITVPEGITVLEAAHEIGVKIPTLCHLDLHDLQLYNKTASCRVCLVEMIQGNSNHNKLVPSCVTRMEEGMMVRTDTIKAITARRIAVELLLSNHPNECFTCPKNLECDLQSLAQELKVREIRWAGERMSYPMDISSDAIAKNSNKCIYCRRCETGCNVVQTCGILSGIGRGFNVFVGPFANIPMAESSCTYCGQCVQSCPTAALTEVYHTDKVWKAIYDPDKFVIVQTAPAIRVALGELFGMKAGTIVTGKMVTALKRIGFDAVFDTNFGADLTVMEEASELIYRLQNNKNLPILTNCCPAWVKFIEHQFPDLIHVPSTCKSPHIMLGQIAKTYYAEKKGLNPDNIVVVSIMPCIAKKAEAKRPELTKDARNNVDISI…	[FeFe] Group A3	[FeFe] Group A3	Bifurcating	Labile	3	[FeFe]-centre, 3 x [4Fe4S] clusters, 1 x [2Fe2S] cluster	NADH dehydrogenase, thioredoxin	0.0929608	0.0219957	0	0	0	0	0	0	0	0	0	0	0	0	0	0	0	0	0	0	0	0	0	0	0	0	0	0	0	0	0	0	0	0	0	0	0	0	0	0	0
WP_013842583.1	MENRTTTPKPVTRRGFLKMLGGVGLAGVAATITGCSTDQAGGKGWLPQQYQVASSWPVQVKGRIPIDPNNPSITRDDQKCILCGQCIEACERIQTVYGYYETPIKDDITCVNCGQCTLWCPTAAITEVDDIDKVVKALEDENVHVVVQTAPATRVALGEEFGMPAGSIVEGKQVAALKKLGFDGVFDTNFSADLTIMEEGTELVKRVTGELDHPLPQFTSCSPGWVKFCEYFYPDLLGHMSSAKSPQQMLGAVVKTYYAEQKGLDPEKIVSVSIMPCTAKKYECQRPEMNDAGHKIGKPQIRDVDIVLTTRELARLIKSKGIDLTKLEDAQYDSILGEGTGAAVIFGTTGGVMEAAVRSAYFLITKQNPPDALLNLTPVRGLNGVKEASLEIPGVGQVN…	[FeFe] Group A3	[FeFe] Group A3	Bifurcating	Labile	3	[FeFe]-centre, 2 x [4Fe4S] clusters	NADH dehydrogenase, thioredoxin	0.061362	0.011764	0	0	0	0	0	0	0	0	0	0	0	0	0	0	0	0	0	0	0	0	0	0	0	0	0	0	0	0	0	0	0	0	0	0	0	0	0	0	0
WP_009617408.1	MDIQLTINDIPLSVPEGMSILDAARTVNIDIPTLCYLNLHEMNMNNHIASCRVCVVEVEGRRNLAPACSTPVFSGMIVKTDTPRAIQGRRTMVELLLSDHPKSCLTCSKNLDCDLQALAADLGVRNISYEGEESEYEIDKSSLAIIRDPNKCIRCRRCETMCNEVQTVGVFSAVGRGFETVVKTAFDLPQHDTSCTFCGQCVAVCPTGALMELDQVDKVWKALSDPTRFVVVQTAPAVRVALGEGFGLEPGTIVTGKMVAALRRLGFDRVFDTDFAADVTIMEEASELVHRLKHGGRLPILTSCCPAWVKFFEHQFPDLLDIPSTCKSPHQMLGVLTKSYYAKTYGIDPQKITVVSIMPCIAKKYEAARPELGQDSVTPDVDIVITTRELARMIREAGI…	[FeFe] Group A3	[FeFe] Group A3	Bifurcating	Labile	3	[FeFe]-centre, 3 x [4Fe4S] clusters, 1 x [2Fe2S] cluster	NADH dehydrogenase, thioredoxin	0.107843	0.14748	0	0	0	0	0	0	0.576106	0	0	0	0.644611	0	0.677647	0	0	0	0	0	0	0	0	0	0.309421	0	0	0	0	0	0	0	0	0	0	0	0	0	0	0	0
WP_008824689.1	MNKVNVKINGMSFDVPQDYTVLDACREASIDVPTLCFFKDMNETGACRMCVVEVEGARTLLASCVTPVRDGMNIKTSSKRVQNARKTNLELILANHNRECLLCDRNKSCELQDFADSMNVKDIAFKGDTREGRFVDATPSIVRDTSKCILCGRCISVCKKSAGMGILSFVERGFDTYVAPAFDFDMGEAGCIYCGQCINACPVSALKEKPEIDRVWDAINDEKKYVVFQTAPAVRAALGEEFGMEIGNRVTGKMVAALRRLGGNKVFDTNFAADLTIMEEANELLDRIKNGGTLPLITSCSPGWVRILENYYPEFIPNLSTCKSPHQMLGAVTKSYYAEKIGVNPKNMYVVSVMPCIAKKFEKDREEMEVNGIRDIDAVITTRELAKMIKEAGIDFNKL…	[FeFe] Group A3	[FeFe] Group A3	Bifurcating	Labile	4	[FeFe]-centre, 3 x [4Fe4S] clusters, 1 x [2Fe2S] cluster	NADH dehydrogenase, thioredoxin, thioredoxin	1.87672	2.3821	0	2.71411	3.10251	3.43929	6.13694	1.59151	3.45663	1.82684	0.913509	0	0	0	0.677647	0	0	0	3.53029	3.94835	2.89209	5.91241	5.3909	0	3.40363	3.37852	1.93537	1.78219	3.91279	0.672082	2.20416	3.86583	1.15221	1.05333	1.34481	0.932444	1.21701	0	1.082	2.45405	3.67147
WP_020585229.1	MSNRTVIPFGPQHPVLPEPIHLKLVVEDEIVKEAVPALGYVHRGLEMLAARRDFHQMVNVCERVCGICSMIHGACFSQSIENIMGIEVPERAQFLRVIWSELHRMHSHLLWLGLYADAFGFEALFMQFWKVRERIMDINEATAGNRVIVSVNVVGGVRKDLSPEQLDWILKELVLVEKELKALESTLLDDYTVKSRTVGIGVMTYDQAYELGAAGPTLRGSGVEQDMRMTGYGAYKHLDFQPVTHPDGDCYARSWVRFHEAYQSIDLVRQAITALPAGSLAAKVKGNPEGESIMRVEQPRGECLYYVKGNGTKLLDRVRIRTPTFANIPCLLTMLPECELADVPVIVLSIDPCISCTER	[NiFe] Group 4e	[NiFe] Group 4e	Evolving	Sensitive	6	[NiFe]-centre, 1 x [4Fe4S] clusters	NuoL, NuoH, NuoC, [FeS] protein	0.0498472	0	0	0.904703	0	0	0	0	0	0	0	0	0	0	0	0	0	0	0	0	0	0	0	0	0	0	0	0	0	0	0	0	0	0	0	0	0	0	0	0	0
WP_013613427.1	MDLKPIYTEPENCQDCYKCVRECPVKAIQIEDNKAYIIEERCIYCGHCTQVCPTGAKKIRDGVSRTRLILQNYPRVILSLAPSWACEFEDLSIGQLIAAIRKLGFSGVSETAIGAELVSSRVSDYLQQSQPGVYISSACPVVVEYIRKYSAEHTPAITPMLSPMLAHARILKDYYGNDLKVIFAGPCICKKLEADHFKELVEVAITFKDLKNWFEKENIHPEQLTPAAEDHFIPWQAGIGSLYPVEGGMLPGIDGESKKIVKMAFSDLSNIKDVIKNLDTRREKDTIFLELLACKGGCINGPAKLSQTSLAIKRYNIQQHRAAHPESTVPDLGHIDLTTTFKAYDCSTARHTEEEIKQALSAVGKNSPEDELNCSGCGYDSCRDFAVALVEGRAEENMC…	[FeFe] Group C	[FeFe] Group C3	Sensory	Labile	3	[FeFe]-centre, 2 x [4Fe4S] clusters, PAS domain	Phosphatase, thioredoxin	4.91807	6.13607	0	0	12.41	2.86607	1.84108	4.77453	6.33716	9.13421	2.74053	5.69432	0	6.02146	0	0	15.3311	2.58584	1.76515	0	0	11.4025	18.8681	0	0.928262	0.675704	5.8061	0	0.489098	0.672082	19.8374	0	0	0	4.03442	0.932444	0	3.95374	0.540998	5.52161	2.7536
WP_014115957.1	MRGIHSAVDDIRRNVFTEVARLAYEGGDYSRIDLIPYKIVPGEESQYRSNVFLARAIVQERLRLACGLPLQPVNVRAPASAGIEEAAAADDKFFEEPLVNVITFACNACPPKQVRVTDSCQGCMSHPCQVVCPKDAIYLDAQKRSHIDQSKCIKCGKCVNQCPYHAITKIERPCAAACGMDAIESDEKGRAKINYNKCVSCGMCLVNCPFAAIADKSQIFQIINAMKRHNKLIACVAPAFVSQFGKEVSPAKLKAAMRLCGFADVVEVAIGADLCTIEEAGDFLENVPKNQPFMGTSCCPAWSVMAKKLFPEFKDYISMALTPMVITARLVKKRYPDARICFIGPCAAKKLEANRKSVRSDVDYVLTFEELQGMFDAKDIDFSQLPEDPADDFTIGTGA…	[FeFe] Group B	[FeFe] Group B	Evolving	Labile	1	[FeFe]-centre, 2 x [4Fe4S] clusters	None	21.3952	27.5352	7.86076	40.7116	23.2688	23.5018	12.8876	7.95755	31.6858	16.4416	17.3567	20.8792	35.4536	24.0858	18.9741	5.65425	11.4983	13.5756	22.9469	7.8967	4.04893	39.1345	51.2135	29.1333	47.3414	14.1898	28.0628	15.1486	6.35828	17.4741	17.8337	12.8861	8.06544	18.96	21.5169	10.2569	11.5616	24.7109	10.82	32.5162	8.2608
WP_018525843.1	MPKITINAKTLEVPPGTTVLDAAMEAGYRIPTLCHVAGRAALGACRVCVVEIGGYPRLQAACSTPVAEGMEIQTNSPQVRXARRTVMELLLSEHQGLCTICDRDEDCELRKIAGTLGIQETPYEGARASMVLDESTAALYRNTGKCIKCRRCVSVCHEMQGVGALFPQGRGFDTLIGPAFSSPLAEVVCVQCGQCAAACPVGAIGERQQVDAVWRALSDPSTHVVVQTAPAIRAALGECFGYPPGTVVTGKMVAALRRLGFDAIFDTNFTADLTIMEEGSELLSRLRTVLADHQEAALPLFTSCSPGWINYAETFFPEILPNISSCKSPQQMFGALAKTYYADKIGVDPAKMVVVSVMPCTAKKAEAERPEMRSSGYQDVDHVLTTRELALMIKTIGLD…	[FeFe] Group A3	[FeFe] Group A3	Bifurcating	Labile	3	[FeFe]-centre, 3 x [4Fe4S] clusters, 1 x [2Fe2S] cluster	NADH dehydrogenase, thioredoxin	0.333368	0.292165	0	0	1.55125	0	0	0	0.576106	0	0	1.89811	0	0	0	0	0	0	0	0	0.578419	0.140772	0	2.08095	0.309421	2.02711	0	0	0	0	0	0.644305	1.15221	0	0	0.932444	0	0.988435	0	0	0.917866
WP_005990603.1	MSMLTITIDGKTTSVPEGSTILDAAKTLDIDIPTLCYLNLEALSINNKAASCRVCVVEVEGRRNLAPSCATPVTDNMVVKTNTLRVLNARRTVLELLLSDHPKDCLVCAKSGECELQTLAERFGIRESPYDGGEMSHYRKDISASIIRDMDKCIMCRRCETMCNTVQTCGVLSGVNRGFTAVVAPAFEMNLADTVCTNCGQCVAVCPTGALVEHEYIWEVVEALANPDKVVIVQTAPAVRAALGEDLGVAPGTSVTGKMAAALRRLGFDHVFDTDFAADLTIMEEGSEFLDRLGKHLAGDTNVKLPILTSCCPGWVKFFEHQFPDMLDVPSTAKSPQQMFGAIAKTYYADLLGIPREKLVVVSVMPCLAKKYECARPEFSVNGNPDVDIVITTRELAKL…	[FeFe] Group A3	[FeFe] Group A3	Bifurcating	Labile	4	[FeFe]-centre, 3 x [4Fe4S] clusters, 1 x [2Fe2S] cluster	NADH dehydrogenase, thioredoxin, thioredoxin	0.253548	0.254579	0	0.904703	3.10251	0.573215	0	0	0.576106	1.82684	0	0	0	0	0.677647	0	0	0	0	0	0.578419	0.281543	0	0	0.309421	2.02711	0	0	0	0	0	0	1.15221	0	0	0	0	0.988435	0	0	0
WP_009379319.1	MTRVVMEHVEYELNVPETGVQPDSLTFVEIDQEKCIGCDTCQQYCPTGAIYGETFEPHTIKYRELCINCGQCLTHCPSMAIYEVRSWVPKLEEKLKDSHVKCVAMPAPSVRYALGEAFGLPVGTVTTGKMLSALKALGFSHCWDTEFAADVTIWEEASEFVERLGGQKDLPQFTSCCPGWQKYAETFYPELLPHFSSCKSPIGMNGALAKTYGAQRMQYAPKDIYTVSIMPCIAKKYEGLRPELNSSGQQDIDATLTTRELAYLIRKAGIDFASLPDGERDSLMGESTGGATIFGVTGGVMEAALRFAYQAVTGIRPDSWDFKQVRGLSGLKEYTVTLNGTELRLAVVHGAKRFAEICEQVKAGNSPYHFIEFMACPGGCVCGGGQPLMPSLFASLERK…	[FeFe] Group A1	[FeFe] Group A1	Evolving	Labile	2	[FeFe]-centre, 2 x [4Fe4S] clusters	Small subunit	0.375105	0.336771	0	0.904703	1.55125	0.573215	0	0	0.576106	0	0	3.79621	0.644611	0	0	0	0	0	1.76515	0	0	0.422315	0	0	0	0.675704	0	0	0	0	0	0	0	0	0	0	0	0	0	0.613512	0
WP_013275594.1	MAIIEINQELCKGCTLCSQVCSVEACSGEPLIPHGIDERRCVNCGQCVVTCPAGAARDRSDLERVKEALEDDSIIKVVQSAPAMRVTLGEEFGMEPGTIVPGRMASAFRKMGFDRVYDTCFAADLTVMEEGHEFLERMEKGGPFPMFTSCCPAWVFFMEKNYPDLVHHLSSCKSPQQMFGAVVKAYMAEKEGIDPARIFMLSAMPCTAKKFEAARSEMNSSGARDVDAVLTTRELAQLIKDRQLELADLPEEDFDIPFGEYTGAGALFGTSGGVMEAALRTVAKKLTGKPLKSIAFEPLRKGGAFREAVIDIGNKKVKIAVVHGLKNIIPVLEEIRKGNSDYHFIEVMTCPDGCIGGGGQPRIPKRSLRQKTVRKRKEALYFYELGLPKIEAGDNPSIK…	[FeFe] Group A4	[FeFe] Group A4	Evolving	Labile	3	[FeFe]-centre, 2 x [4Fe4S] clusters	FeS protein, FeS protein	0.265117	0.261402	0.604674	0.904703	0	0	0	0	3.45663	0.913421	0	0	0.644611	0	0	0	0	0	0	0	0	0.703859	0	0	1.85652	0	0	0	0	0	0	0	0	0	0	2.79733	0	0	0	0	0.917866
WP_015393615.1	MVNNNTSFIQSSLGSVFSVFSEEELKQLKDGRKIAICGKVNKPGIIEVPEGATLNDIIELCGGLINKSGFKAAQIGLPFGGFLTEDSLNKEFDFNLFYENIAKTIIVLSQEDCIIQFEKFYIRYLLAKIKDGSYKNYEIVKEDITEMYNVLNRISKGVSNMRELYTLRNLAITVKTKMNQKHNIMEEIIDKFYEEIEEHIEEKKCPTSQCSHLIKLKITKKCIGCGACKRACPVDCIDGELKKQHVIDDNRCTHCGACVSACPVDAIFTGDNTLLFLRNLATPNKVVITQMAPAVRVAIGEAFGFEPGENVEKKLAAGLRKLGVDYVFDTSWGADLTIMEEAAELQERLEKHLAGDENVKLPILTSCCPSWIKFIEQNYGDMLEVPSSAKSPMEMFGIV…	[FeFe] Group A1	[FeFe] Group A1	Evolving	Labile	1	[FeFe]-centre, 2 x [4Fe4S] clusters	None	0.254753	1.16049	0.604674	0	0	0	0	0	2.88053	0	0	0	0	0	0	3.14125	0	0	0	0	0	0.140772	0	0	0	0	0	0	0	0.672082	0	1.28861	0	0.526666	0	0	1.82551	0	0	1.22702	0
WP_015718812.1	MSKIVVDPITRIEGHLRVEAEVTDGKISNAWVSGTMFRGIEKVLQGRDPRDAWYFTQRFCGVCTTVHSIASIRAVEDALKIPVPPNAQLIRNIIIAIQNTQDHVIHFYHLHALDWVDITSGLKADPVKTAQLASSISDWPNNSPTYFKAVQDKVKAFVASGRLGPFANAYWGHPAYKLPPEANLMATAHYLEALEWQKDIIKIHAILGSKNPHPQTFLVGGMAIPIDPDSQNALNADKLIEVKRLLHKAQEFVEKVYIPDLLAVASFYKEWAAIGAGVGNYMCYPEFPDAAGNFWLPGGAILNRDISKVVPLDQKKITEHVEHSWYQDADGEGKGLHPWEGSTEPNYTGPKPPYQYLDTDKKYSWVKAPRYEERPMEVGPLSRVLVAYVSGHKETKAAV…	[NiFe] Group 1f	[NiFe] Group 1f	Anaerobic Uptake	Unknown	3	[NiFe]-centre, 2 x [4Fe4S] clusters, 1 x [3Fe4S] cluster	Cytochrome b	0.102035	0.0202326	0	0	0	0	0	0	0	0	0	0	0	0	0	0	3.83277	0	0	0	0	0	0	0	0	0	0	0	0	0	0.200378	0	0	0	0	0	0	0	0	0	0
[truncated: 1,042 more rows]
[truncated: 92 more columns]
